# Supplementary material for: Reinvestigating the phylogeny of Myriapoda with more extensive taxon sampling and novel genetic perspective
Source: PeerJ. 2021 Dec 23;9:e12691. doi: 10.7717/peerj.12691 (PMC8710254; doi:10.7717/peerj.12691)
Supplement: Supplemental Information 1 [file peerj-09-12691-s001.xls]

## Sheet: Sheet1
Single_copy_orthologs(arthropoda_odb10)	Confirmed by OrthoFinder	Species_num	Occupacy(%)	Drosophila melanogaster	Eupolybothrus cavernicolus	Epanerchodus sp.	Skleroprotopus sp.	Scolopendra sp.	Strigamia maritima	Cryptops hortensis	Scutigera coleoptrata	Clinopodes flavidus	Himantarium gabrielis	Ommatoiulus sabulosus	Scolopendra cingulata	Scolopocryptops rubiginosus	Thalassisobates littoralis	Craterostigmus tasmanianus	Craterostigmus crabilli	Glomeris marginata	Narceus americanus	Eudigraphis taiwanensis	Cyliosoma sp.	Scutigerella sp	Acopauropus ornatus	Callipus foetidissimus	Craspedosoma sp.	Cryptops anomalans	Eupolybothrus fasciatus	Eupolybothrus tridentinus	Glomeridella minima	Hanseniella nivea	Haploglomeris multistriata	Henia illyrica	Polydesmus complanatus	Polyxenus lagurus	Polyzonium germanicum	Schendyla carniolensis	Strigamia acuminata	Symphylella sp.	Pauropus huxleyi	Hanseniella sp.	Brachycybe sp.
10573at6656	FALSE	40	100	FBpp0087438	TRINITY_DN66757_c0_g1_i1.p1	TRINITY_DN55606_c0_g1_i1.p1	TRINITY_DN51676_c0_g1_i1.p1	c83095_g1_i1.p1	SMAR012908-PA	TRINITY_DN28657_c0_g1_i4.p1	TRINITY_DN41641_c0_g1_i1.p1	TRINITY_DN9089_c0_g1_i1.p1	TRINITY_DN3864_c0_g1_i3.p1	TRINITY_DN5440_c0_g1_i1.p1	TRINITY_DN839_c0_g1_i2.p1	TRINITY_DN27763_c0_g1_i1.p1	TRINITY_DN29285_c0_g1_i2.p1	TRINITY_DN895_c0_g1_i5.p1	TRINITY_DN5483_c0_g1_i1.p1	TRINITY_DN32515_c1_g1_i2.p1	TRINITY_DN70796_c0_g1_i1.p2	TRINITY_DN82956_c0_g1_i1.p1	TRINITY_DN41091_c0_g1_i1.p1	TRINITY_DN71708_c0_g1_i1.p1	TRINITY_DN6700_c1_g1_i1.p1	TRINITY_DN19259_c0_g1_i1.p1	TRINITY_DN3225_c0_g1_i3.p1	TRINITY_DN15971_c0_g1_i2.p1	TRINITY_DN1661_c0_g1_i10.p1	TRINITY_DN21079_c0_g1_i1.p1	TRINITY_DN3890_c0_g1_i1.p1	TRINITY_DN12304_c0_g1_i3.p1	TRINITY_DN5226_c0_g1_i1.p1	TRINITY_DN14099_c0_g1_i1.p1	TRINITY_DN3285_c0_g2_i1.p1	TRINITY_DN925_c0_g1_i5.p1	TRINITY_DN1454_c0_g1_i1.p1	TRINITY_DN409_c0_g1_i13.p1	TRINITY_DN215_c1_g1_i37.p1	TRINITY_DN25973_c0_g1_i2.p1	TRINITY_DN28799_c1_g1_i1.p1	TRINITY_DN92189_c0_g1_i1.p1	TRINITY_DN13114_c0_g1_i1.p1
109325at6656	TRUE	40	100	FBpp0087186	TRINITY_DN2218_c0_g1_i1.p1	TRINITY_DN23409_c0_g1_i1.p1	TRINITY_DN48613_c0_g1_i1.p1	c93524_g5_i1.p1	SMAR002119-PA	TRINITY_DN24946_c0_g1_i1.p1	TRINITY_DN32713_c0_g1_i1.p1	TRINITY_DN758_c0_g1_i1.p1	TRINITY_DN4721_c0_g1_i1.p1	TRINITY_DN427_c0_g1_i1.p1	TRINITY_DN1709_c0_g1_i1.p1	TRINITY_DN1606_c0_g1_i3.p1	TRINITY_DN3926_c0_g1_i1.p1	TRINITY_DN4887_c0_g1_i1.p1	TRINITY_DN26271_c0_g1_i1.p1	TRINITY_DN25837_c1_g1_i1.p2	TRINITY_DN71587_c0_g1_i1.p1	TRINITY_DN85903_c1_g1_i1.p1	TRINITY_DN42677_c0_g1_i1.p1	TRINITY_DN60085_c1_g1_i1.p1	TRINITY_DN4000_c0_g1_i16.p1	TRINITY_DN2127_c0_g1_i1.p1	TRINITY_DN678_c0_g1_i4.p1	TRINITY_DN422_c0_g1_i3.p1	TRINITY_DN72222_c0_g1_i1.p1	TRINITY_DN50920_c0_g1_i2.p1	TRINITY_DN34720_c0_g1_i1.p1	TRINITY_DN4312_c0_g1_i1.p1	TRINITY_DN3544_c0_g1_i2.p1	TRINITY_DN28774_c0_g1_i1.p1	TRINITY_DN553_c0_g1_i1.p1	TRINITY_DN17617_c0_g1_i20.p1	TRINITY_DN3771_c0_g2_i3.p3	TRINITY_DN6308_c0_g1_i5.p2	TRINITY_DN4266_c0_g1_i2.p1	TRINITY_DN25358_c1_g1_i2.p1	TRINITY_DN39900_c0_g1_i1.p1	TRINITY_DN85376_c0_g1_i1.p1	TRINITY_DN9734_c0_g1_i1.p1
110129at6656	FALSE	40	100	FBpp0079597	TRINITY_DN4439_c0_g1_i1.p1	TRINITY_DN32351_c0_g1_i1.p2	TRINITY_DN52034_c0_g1_i3.p2	c39072_g1_i1.p1	SMAR014793-PA	TRINITY_DN40790_c0_g2_i1.p1	TRINITY_DN103435_c0_g1_i1.p1	TRINITY_DN5221_c0_g1_i1.p1	TRINITY_DN4369_c0_g1_i2.p1	TRINITY_DN1991_c0_g1_i3.p1	TRINITY_DN18222_c0_g1_i1.p1	TRINITY_DN2930_c0_g1_i1.p1	TRINITY_DN1930_c1_g1_i10.p1	TRINITY_DN3406_c0_g1_i1.p1	TRINITY_DN24710_c0_g1_i1.p1	TRINITY_DN27407_c0_g1_i3.p1	TRINITY_DN59024_c0_g2_i1.p1	TRINITY_DN81467_c0_g1_i1.p1	TRINITY_DN19741_c0_g1_i1.p1	TRINITY_DN15642_c0_g1_i1.p1	TRINITY_DN4356_c7_g1_i1.p1	TRINITY_DN38146_c0_g1_i1.p1	TRINITY_DN3346_c0_g1_i4.p1	TRINITY_DN41820_c0_g1_i1.p1	TRINITY_DN62803_c0_g1_i1.p1	TRINITY_DN4899_c0_g1_i1.p1	TRINITY_DN18586_c0_g2_i2.p2	TRINITY_DN10380_c0_g1_i3.p1	TRINITY_DN14892_c0_g1_i10.p1	TRINITY_DN2461_c0_g1_i1.p1	TRINITY_DN1870_c0_g1_i1.p1	TRINITY_DN7578_c0_g1_i2.p1	TRINITY_DN2986_c0_g1_i2.p1	TRINITY_DN4594_c0_g1_i5.p2	TRINITY_DN4281_c0_g1_i2.p1	TRINITY_DN17518_c0_g1_i1.p1	TRINITY_DN57279_c0_g1_i1.p1	TRINITY_DN58248_c0_g1_i1.p1	TRINITY_DN12043_c0_g1_i1.p1
113604at6656	FALSE	40	100	FBpp0087511	TRINITY_DN7149_c0_g1_i1.p1	TRINITY_DN28455_c0_g1_i1.p1	TRINITY_DN50444_c0_g1_i1.p1	c81606_g1_i1.p1	SMAR004524-PA	TRINITY_DN21464_c0_g2_i1.p1	TRINITY_DN106289_c0_g1_i1.p1	TRINITY_DN2414_c0_g1_i1.p1	TRINITY_DN15376_c0_g1_i1.p1	TRINITY_DN2144_c0_g1_i2.p1	TRINITY_DN28638_c0_g1_i1.p1	TRINITY_DN5734_c0_g1_i4.p1	TRINITY_DN3811_c0_g1_i3.p1	TRINITY_DN10859_c0_g1_i1.p1	TRINITY_DN20484_c0_g1_i1.p1	TRINITY_DN20598_c0_g1_i2.p1	TRINITY_DN72051_c0_g1_i1.p1	TRINITY_DN84777_c1_g1_i2.p1	TRINITY_DN66096_c0_g1_i1.p1	TRINITY_DN22314_c0_g1_i1.p1	TRINITY_DN3052_c0_g1_i1.p1	TRINITY_DN40508_c0_g1_i1.p1	TRINITY_DN3446_c0_g1_i2.p1	TRINITY_DN3932_c0_g1_i1.p1	TRINITY_DN9871_c0_g1_i2.p1	TRINITY_DN1216_c0_g1_i10.p1	TRINITY_DN8048_c0_g2_i1.p1	TRINITY_DN2210_c0_g1_i3.p1	TRINITY_DN4411_c0_g1_i1.p1	TRINITY_DN6566_c0_g1_i1.p2	TRINITY_DN4640_c0_g1_i2.p1	TRINITY_DN3253_c0_g1_i2.p1	TRINITY_DN1726_c0_g2_i1.p1	TRINITY_DN5998_c0_g1_i2.p1	TRINITY_DN2334_c0_g1_i2.p2	TRINITY_DN20149_c0_g1_i1.p1	TRINITY_DN29331_c0_g1_i1.p1	TRINITY_DN134764_c0_g1_i1.p1	TRINITY_DN7336_c0_g1_i1.p1
118496at6656	FALSE	40	100	FBpp0078381	TRINITY_DN53483_c0_g1_i1.p1	TRINITY_DN27798_c0_g1_i1.p1	TRINITY_DN36228_c0_g1_i1.p1	c98576_g6_i1.p1	SMAR013013-PA	TRINITY_DN21699_c0_g2_i1.p1	TRINITY_DN41839_c1_g1_i1.p1	TRINITY_DN25653_c0_g1_i1.p1	TRINITY_DN4749_c0_g2_i1.p1	TRINITY_DN643_c0_g1_i2.p1	TRINITY_DN2674_c0_g1_i2.p1	TRINITY_DN1514_c0_g1_i1.p1	TRINITY_DN8084_c0_g1_i1.p1	TRINITY_DN1303_c0_g1_i1.p1	TRINITY_DN21863_c0_g2_i1.p1	TRINITY_DN32700_c8_g3_i1.p5	TRINITY_DN58590_c0_g1_i1.p1	TRINITY_DN81802_c0_g1_i1.p1	TRINITY_DN47405_c0_g4_i1.p1	TRINITY_DN27413_c0_g2_i1.p1	TRINITY_DN22369_c0_g2_i1.p1	TRINITY_DN1646_c0_g1_i1.p1	TRINITY_DN4243_c0_g1_i2.p2	TRINITY_DN1173_c0_g1_i3.p2	TRINITY_DN49945_c0_g1_i1.p1	TRINITY_DN20569_c0_g1_i1.p1	TRINITY_DN176_c3_g1_i1.p1	TRINITY_DN502_c0_g1_i12.p1	TRINITY_DN4530_c0_g1_i7.p2	TRINITY_DN28387_c0_g1_i1.p1	TRINITY_DN2140_c0_g1_i5.p1	TRINITY_DN1058_c0_g1_i1.p1	TRINITY_DN5594_c0_g1_i1.p3	TRINITY_DN3489_c0_g1_i3.p1	TRINITY_DN2659_c0_g1_i1.p1	TRINITY_DN18224_c0_g1_i1.p1	TRINITY_DN29684_c0_g1_i1.p1	TRINITY_DN85799_c1_g1_i1.p1	TRINITY_DN13137_c0_g1_i1.p2
120958at6656	TRUE	40	100	FBpp0086051	TRINITY_DN1197_c0_g2_i2.p1	TRINITY_DN25318_c0_g1_i1.p1	TRINITY_DN48425_c0_g1_i1.p2	c87223_g1_i1.p1	SMAR009211-PA	TRINITY_DN22399_c0_g1_i2.p1	TRINITY_DN86447_c0_g1_i1.p1	TRINITY_DN465_c0_g1_i1.p1	TRINITY_DN23794_c0_g1_i1.p1	TRINITY_DN3441_c0_g1_i2.p1	TRINITY_DN5075_c0_g1_i5.p1	TRINITY_DN990_c0_g1_i1.p1	TRINITY_DN1563_c0_g1_i1.p1	TRINITY_DN7283_c0_g2_i2.p1	TRINITY_DN30904_c0_g1_i5.p1	TRINITY_DN56336_c0_g1_i1.p1	TRINITY_DN73360_c0_g1_i3.p1	TRINITY_DN136701_c0_g1_i1.p1	TRINITY_DN33414_c0_g1_i1.p1	TRINITY_DN72716_c0_g1_i1.p1	TRINITY_DN3000_c0_g2_i1.p1	TRINITY_DN13069_c0_g1_i1.p1	TRINITY_DN2144_c0_g1_i1.p1	TRINITY_DN2187_c0_g1_i5.p1	TRINITY_DN27547_c0_g1_i7.p1	TRINITY_DN4906_c0_g1_i7.p1	TRINITY_DN3616_c0_g1_i1.p1	TRINITY_DN3295_c0_g1_i1.p1	TRINITY_DN129_c5_g1_i1.p1	TRINITY_DN28775_c0_g1_i1.p1	TRINITY_DN4764_c0_g1_i5.p1	TRINITY_DN560_c0_g1_i10.p1	TRINITY_DN3125_c0_g1_i1.p1	TRINITY_DN2834_c0_g1_i1.p1	TRINITY_DN514_c0_g1_i1.p1	TRINITY_DN22685_c0_g1_i1.p1	TRINITY_DN27918_c0_g1_i2.p1	TRINITY_DN6054_c0_g2_i1.p1	TRINITY_DN2545_c0_g1_i1.p1
12383at6656	TRUE	40	100	FBpp0075982	TRINITY_DN3381_c0_g1_i1.p1	TRINITY_DN19739_c0_g1_i1.p1	TRINITY_DN51863_c0_g1_i1.p1	c97332_g4_i1.p1	SMAR009998-PA	TRINITY_DN25175_c0_g3_i1.p1	TRINITY_DN38725_c0_g1_i1.p1	TRINITY_DN5790_c0_g1_i1.p1	TRINITY_DN5615_c0_g1_i4.p1	TRINITY_DN6616_c0_g1_i3.p1	TRINITY_DN4396_c0_g1_i2.p1	TRINITY_DN10723_c0_g1_i1.p1	TRINITY_DN37883_c0_g1_i1.p1	TRINITY_DN17659_c0_g1_i1.p1	TRINITY_DN72579_c0_g1_i1.p1	TRINITY_DN33198_c2_g2_i2.p1	TRINITY_DN130802_c0_g1_i1.p1	TRINITY_DN79796_c0_g2_i1.p1	TRINITY_DN67722_c0_g1_i1.p1	TRINITY_DN20359_c0_g1_i1.p1	TRINITY_DN30009_c0_g1_i3.p1	TRINITY_DN12609_c0_g1_i2.p1	TRINITY_DN2120_c0_g1_i3.p1	TRINITY_DN5259_c0_g1_i2.p1	TRINITY_DN60428_c0_g1_i1.p1	TRINITY_DN64790_c0_g1_i1.p1	TRINITY_DN10509_c0_g1_i1.p1	TRINITY_DN2578_c0_g1_i7.p1	TRINITY_DN1381_c0_g1_i4.p1	TRINITY_DN18743_c0_g1_i1.p1	TRINITY_DN33265_c0_g1_i1.p1	TRINITY_DN2223_c0_g1_i3.p1	TRINITY_DN26118_c0_g1_i1.p1	TRINITY_DN24378_c0_g1_i1.p1	TRINITY_DN5402_c0_g2_i1.p1	TRINITY_DN11854_c0_g1_i1.p1	TRINITY_DN30020_c0_g1_i1.p1	TRINITY_DN86774_c0_g1_i1.p1	TRINITY_DN10198_c0_g1_i1.p1
125446at6656	FALSE	40	100	FBpp0292157	TRINITY_DN13755_c0_g1_i1.p1	TRINITY_DN56156_c0_g1_i1.p1	TRINITY_DN52949_c0_g1_i1.p2	c51579_g1_i1.p1	SMAR014401-PA	TRINITY_DN54419_c0_g2_i1.p1	TRINITY_DN21722_c1_g1_i1.p1	TRINITY_DN45647_c0_g1_i1.p1	TRINITY_DN1707_c0_g1_i1.p1	TRINITY_DN25215_c0_g1_i1.p1	TRINITY_DN27683_c0_g1_i1.p1	TRINITY_DN8656_c0_g1_i1.p1	TRINITY_DN4301_c0_g1_i1.p1	TRINITY_DN2036_c0_g3_i1.p1	TRINITY_DN19358_c0_g1_i1.p1	TRINITY_DN28197_c1_g1_i1.p1	TRINITY_DN49327_c0_g1_i1.p1	TRINITY_DN42581_c0_g1_i1.p1	TRINITY_DN85666_c0_g1_i1.p1	TRINITY_DN42029_c0_g2_i1.p1	TRINITY_DN1926_c0_g1_i1.p1	TRINITY_DN8138_c0_g1_i2.p1	TRINITY_DN2531_c0_g2_i11.p1	TRINITY_DN22785_c0_g1_i1.p1	TRINITY_DN1273_c0_g1_i14.p1	TRINITY_DN2605_c0_g1_i1.p1	TRINITY_DN32255_c0_g1_i2.p1	TRINITY_DN2534_c0_g1_i2.p2	TRINITY_DN1261_c0_g1_i25.p2	TRINITY_DN1063_c0_g1_i12.p1	TRINITY_DN754_c0_g1_i1.p1	TRINITY_DN1325_c0_g1_i2.p1	TRINITY_DN2110_c1_g1_i1.p1	TRINITY_DN5819_c0_g1_i5.p1	TRINITY_DN341_c0_g1_i1.p1	TRINITY_DN25213_c0_g1_i1.p1	TRINITY_DN15105_c0_g1_i1.p1	TRINITY_DN90715_c10_g2_i1.p1	TRINITY_DN4869_c0_g1_i1.p2
127998at6656	TRUE	40	100	FBpp0070877	TRINITY_DN1553_c0_g1_i1.p1	TRINITY_DN7000_c0_g1_i1.p1	TRINITY_DN49524_c0_g1_i1.p1	c62186_g1_i1.p1	SMAR010540-PA	TRINITY_DN18006_c0_g1_i1.p1	TRINITY_DN757_c1_g1_i1.p1	TRINITY_DN5553_c0_g1_i1.p1	TRINITY_DN361_c0_g1_i1.p1	TRINITY_DN816_c0_g1_i2.p2	TRINITY_DN59_c0_g1_i1.p1	TRINITY_DN13249_c0_g1_i1.p1	TRINITY_DN9580_c0_g1_i2.p1	TRINITY_DN13021_c0_g1_i1.p1	TRINITY_DN11687_c0_g1_i1.p1	TRINITY_DN30996_c4_g1_i2.p1	TRINITY_DN70630_c0_g1_i1.p1	TRINITY_DN80545_c0_g1_i1.p1	TRINITY_DN45817_c0_g1_i2.p1	TRINITY_DN65798_c0_g1_i1.p1	TRINITY_DN4344_c0_g2_i1.p1	TRINITY_DN647_c0_g1_i1.p1	TRINITY_DN402_c0_g1_i1.p1	TRINITY_DN1044_c0_g1_i2.p1	TRINITY_DN651_c0_g1_i1.p1	TRINITY_DN2877_c0_g1_i1.p1	TRINITY_DN189_c0_g1_i4.p2	TRINITY_DN48437_c0_g1_i1.p1	TRINITY_DN10179_c0_g1_i1.p1	TRINITY_DN472_c0_g1_i5.p1	TRINITY_DN661_c0_g1_i1.p1	TRINITY_DN42265_c0_g1_i1.p1	TRINITY_DN4689_c0_g1_i1.p1	TRINITY_DN9213_c0_g1_i1.p1	TRINITY_DN2053_c0_g1_i1.p1	TRINITY_DN31144_c0_g1_i1.p1	TRINITY_DN25254_c0_g1_i1.p1	TRINITY_DN50228_c0_g1_i1.p1	TRINITY_DN14367_c0_g1_i1.p1
134708at6656	TRUE	40	100	FBpp0075700	TRINITY_DN3575_c0_g1_i1.p1	TRINITY_DN28382_c0_g1_i1.p1	TRINITY_DN45961_c0_g1_i1.p1	c89811_g1_i1.p1	SMAR014176-PA	TRINITY_DN9659_c0_g1_i1.p1	TRINITY_DN34626_c1_g2_i1.p1	TRINITY_DN101_c0_g1_i1.p1	TRINITY_DN5834_c0_g1_i2.p1	TRINITY_DN400_c0_g1_i2.p1	TRINITY_DN2422_c0_g1_i1.p1	TRINITY_DN129_c0_g1_i2.p1	TRINITY_DN32_c0_g1_i1.p1	TRINITY_DN12767_c0_g1_i1.p1	TRINITY_DN28855_c0_g1_i1.p1	TRINITY_DN33623_c0_g1_i1.p1	TRINITY_DN78933_c0_g2_i1.p1	TRINITY_DN31561_c0_g1_i1.p1	TRINITY_DN45790_c0_g1_i1.p1	TRINITY_DN52479_c0_g1_i1.p1	TRINITY_DN1043_c0_g1_i2.p1	TRINITY_DN50_c0_g1_i2.p1	TRINITY_DN217_c0_g1_i1.p1	TRINITY_DN1235_c0_g4_i2.p1	TRINITY_DN1960_c0_g1_i1.p1	TRINITY_DN3890_c0_g1_i1.p1	TRINITY_DN1902_c0_g2_i2.p1	TRINITY_DN316_c0_g1_i4.p1	TRINITY_DN3442_c0_g1_i1.p1	TRINITY_DN2116_c0_g1_i3.p1	TRINITY_DN26_c0_g1_i1.p1	TRINITY_DN62_c0_g1_i1.p1	TRINITY_DN46_c0_g1_i1.p1	TRINITY_DN327_c1_g1_i2.p1	TRINITY_DN20_c0_g1_i1.p1	TRINITY_DN19438_c0_g1_i1.p1	TRINITY_DN30708_c6_g1_i2.p1	TRINITY_DN91431_c24_g1_i1.p1	TRINITY_DN2003_c0_g1_i1.p1
135107at6656	TRUE	40	100	FBpp0075111	TRINITY_DN13194_c0_g1_i1.p1	TRINITY_DN5453_c0_g1_i1.p1	TRINITY_DN60046_c0_g1_i1.p1	c87709_g2_i1.p1	SMAR014679-PA	TRINITY_DN23835_c0_g1_i2.p1	TRINITY_DN3077_c0_g1_i2.p1	TRINITY_DN38668_c0_g1_i1.p1	TRINITY_DN1444_c0_g1_i1.p1	TRINITY_DN917_c0_g1_i6.p1	TRINITY_DN533_c0_g1_i3.p1	TRINITY_DN29174_c0_g1_i1.p1	TRINITY_DN45950_c0_g1_i1.p1	TRINITY_DN12865_c0_g1_i1.p1	TRINITY_DN22938_c0_g1_i1.p1	TRINITY_DN14852_c0_g2_i1.p1	TRINITY_DN125346_c0_g1_i1.p1	TRINITY_DN96710_c0_g1_i1.p1	TRINITY_DN41760_c0_g1_i1.p1	TRINITY_DN74835_c0_g1_i1.p1	TRINITY_DN1930_c0_g1_i1.p1	TRINITY_DN26516_c0_g1_i1.p1	TRINITY_DN2572_c0_g1_i10.p5	TRINITY_DN612_c0_g1_i1.p1	TRINITY_DN1700_c0_g1_i1.p1	TRINITY_DN5964_c0_g1_i5.p1	TRINITY_DN6175_c0_g1_i2.p1	TRINITY_DN1296_c0_g1_i1.p1	TRINITY_DN1363_c0_g1_i1.p1	TRINITY_DN3559_c0_g1_i1.p1	TRINITY_DN499_c0_g1_i1.p1	TRINITY_DN28589_c0_g1_i3.p1	TRINITY_DN3217_c0_g1_i1.p1	TRINITY_DN5458_c0_g1_i1.p1	TRINITY_DN5788_c0_g1_i1.p1	TRINITY_DN11492_c0_g2_i1.p1	TRINITY_DN27551_c0_g1_i4.p1	TRINITY_DN84416_c3_g3_i2.p1	TRINITY_DN9589_c0_g1_i1.p1
137050at6656	TRUE	40	100	FBpp0075612	TRINITY_DN6893_c0_g1_i1.p1	TRINITY_DN28071_c0_g1_i1.p2	TRINITY_DN32926_c0_g1_i1.p1	c68083_g1_i1.p1	SMAR001472-PA	TRINITY_DN32231_c1_g2_i1.p1	TRINITY_DN22969_c0_g1_i1.p1	TRINITY_DN14261_c0_g1_i3.p3	TRINITY_DN4909_c0_g1_i2.p1	TRINITY_DN15377_c0_g1_i1.p1	TRINITY_DN27945_c0_g1_i1.p1	TRINITY_DN3938_c0_g1_i1.p1	TRINITY_DN262_c0_g1_i2.p1	TRINITY_DN509_c0_g1_i1.p1	TRINITY_DN50110_c0_g2_i1.p1	TRINITY_DN12083_c2_g3_i1.p1	TRINITY_DN103052_c0_g1_i1.p1	TRINITY_DN51214_c0_g1_i1.p1	TRINITY_DN19536_c0_g1_i1.p1	TRINITY_DN29262_c0_g1_i1.p1	TRINITY_DN347_c0_g1_i1.p1	TRINITY_DN733_c0_g2_i1.p1	TRINITY_DN2821_c0_g1_i1.p1	TRINITY_DN481_c0_g1_i4.p2	TRINITY_DN72707_c0_g1_i1.p1	TRINITY_DN1309_c0_g1_i1.p1	TRINITY_DN4087_c0_g1_i1.p1	TRINITY_DN5087_c0_g2_i1.p1	TRINITY_DN39684_c1_g1_i1.p1	TRINITY_DN12783_c0_g1_i1.p1	TRINITY_DN692_c0_g1_i1.p1	TRINITY_DN1573_c0_g1_i3.p1	TRINITY_DN11966_c0_g1_i1.p1	TRINITY_DN164_c0_g1_i4.p2	TRINITY_DN12157_c0_g1_i1.p1	TRINITY_DN31076_c0_g1_i1.p1	TRINITY_DN16078_c0_g1_i1.p1	TRINITY_DN81172_c0_g1_i1.p1	TRINITY_DN15581_c0_g1_i1.p1
137338at6656	FALSE	40	100	FBpp0297827	TRINITY_DN6287_c0_g1_i1.p1	TRINITY_DN21333_c0_g2_i2.p1	TRINITY_DN45986_c0_g1_i1.p1	c73552_g1_i1.p1	SMAR008109-PA	TRINITY_DN23839_c0_g1_i1.p1	TRINITY_DN51816_c0_g1_i1.p1	TRINITY_DN3674_c1_g1_i1.p1	TRINITY_DN308_c0_g1_i18.p1	TRINITY_DN1934_c0_g1_i1.p1	TRINITY_DN3253_c0_g1_i1.p1	TRINITY_DN783_c0_g1_i1.p1	TRINITY_DN836_c0_g1_i1.p1	TRINITY_DN11225_c0_g1_i1.p2	TRINITY_DN335_c0_g1_i1.p1	TRINITY_DN31100_c0_g1_i10.p1	TRINITY_DN68697_c0_g1_i1.p1	TRINITY_DN77781_c0_g2_i1.p1	TRINITY_DN39949_c0_g1_i1.p1	TRINITY_DN58208_c0_g1_i1.p1	TRINITY_DN2716_c0_g1_i3.p1	TRINITY_DN27250_c0_g1_i1.p1	TRINITY_DN15329_c0_g1_i1.p1	TRINITY_DN4149_c0_g1_i1.p1	TRINITY_DN38308_c0_g1_i1.p1	TRINITY_DN22639_c0_g1_i2.p1	TRINITY_DN3671_c4_g1_i2.p1	TRINITY_DN5370_c0_g1_i4.p2	TRINITY_DN8197_c0_g1_i2.p1	TRINITY_DN4039_c0_g1_i2.p1	TRINITY_DN693_c0_g1_i10.p1	TRINITY_DN6548_c0_g1_i13.p1	TRINITY_DN2518_c0_g1_i16.p1	TRINITY_DN2246_c0_g1_i3.p1	TRINITY_DN1167_c0_g1_i3.p1	TRINITY_DN3101_c0_g1_i1.p1	TRINITY_DN31812_c0_g3_i2.p1	TRINITY_DN67883_c0_g1_i1.p1	TRINITY_DN4221_c0_g1_i1.p1
140693at6656	TRUE	40	100	FBpp0077209	TRINITY_DN26227_c0_g1_i1.p1	TRINITY_DN29595_c0_g1_i3.p2	TRINITY_DN36830_c0_g1_i1.p1	c72420_g1_i1.p1	SMAR007507-PA	TRINITY_DN17041_c0_g1_i1.p1	TRINITY_DN36533_c0_g1_i2.p1	TRINITY_DN4758_c0_g1_i1.p1	TRINITY_DN744_c0_g1_i3.p1	TRINITY_DN168_c0_g1_i1.p1	TRINITY_DN12347_c0_g1_i1.p1	TRINITY_DN5445_c0_g1_i7.p1	TRINITY_DN12392_c0_g1_i3.p1	TRINITY_DN22859_c0_g1_i1.p1	TRINITY_DN4435_c1_g1_i1.p1	TRINITY_DN30184_c0_g3_i4.p2	TRINITY_DN68775_c1_g1_i2.p1	TRINITY_DN67769_c0_g1_i1.p1	TRINITY_DN36660_c0_g1_i1.p2	TRINITY_DN49219_c0_g1_i1.p1	TRINITY_DN7971_c0_g1_i1.p1	TRINITY_DN5753_c0_g1_i1.p1	TRINITY_DN649_c0_g1_i1.p2	TRINITY_DN18362_c0_g1_i1.p1	TRINITY_DN4764_c0_g1_i1.p1	TRINITY_DN50880_c0_g1_i1.p1	TRINITY_DN2088_c0_g1_i1.p2	TRINITY_DN1922_c0_g1_i1.p1	TRINITY_DN34145_c0_g1_i1.p1	TRINITY_DN469_c0_g1_i1.p1	TRINITY_DN39_c0_g1_i4.p1	TRINITY_DN2059_c2_g3_i3.p1	TRINITY_DN4639_c0_g1_i1.p1	TRINITY_DN3059_c0_g1_i4.p1	TRINITY_DN834_c0_g1_i1.p1	TRINITY_DN22282_c0_g1_i1.p1	TRINITY_DN26307_c0_g1_i1.p2	TRINITY_DN89974_c6_g4_i1.p1	TRINITY_DN14403_c0_g1_i1.p1
142415at6656	FALSE	40	100	FBpp0071767	TRINITY_DN1702_c0_g1_i1.p1	TRINITY_DN5778_c0_g1_i1.p1	TRINITY_DN43283_c0_g1_i1.p1	c80380_g1_i1.p1	SMAR007394-PA	TRINITY_DN24894_c0_g2_i1.p1	TRINITY_DN43303_c1_g1_i3.p1	TRINITY_DN3565_c0_g1_i1.p2	TRINITY_DN4788_c0_g1_i2.p1	TRINITY_DN30256_c0_g1_i2.p1	TRINITY_DN92_c0_g1_i1.p1	TRINITY_DN15636_c0_g2_i1.p1	TRINITY_DN3398_c0_g1_i1.p1	TRINITY_DN3696_c0_g1_i17.p1	TRINITY_DN11698_c0_g1_i1.p2	TRINITY_DN27814_c2_g1_i9.p1	TRINITY_DN68967_c0_g1_i2.p1	TRINITY_DN49344_c0_g1_i1.p1	TRINITY_DN66162_c0_g1_i1.p2	TRINITY_DN29097_c0_g1_i1.p1	TRINITY_DN47722_c0_g1_i1.p1	TRINITY_DN38488_c0_g1_i1.p1	TRINITY_DN5048_c0_g1_i1.p1	TRINITY_DN6323_c0_g1_i7.p1	TRINITY_DN60952_c0_g1_i1.p1	TRINITY_DN17835_c0_g1_i1.p1	TRINITY_DN2687_c0_g1_i3.p1	TRINITY_DN7105_c0_g1_i1.p1	TRINITY_DN2133_c1_g1_i1.p1	TRINITY_DN1042_c0_g1_i18.p2	TRINITY_DN1524_c0_g1_i11.p1	TRINITY_DN75559_c0_g1_i1.p1	TRINITY_DN617_c0_g1_i1.p1	TRINITY_DN34460_c0_g1_i1.p1	TRINITY_DN3942_c0_g1_i2.p1	TRINITY_DN2968_c0_g1_i1.p1	TRINITY_DN27399_c0_g2_i1.p2	TRINITY_DN68028_c0_g1_i2.p1	TRINITY_DN10620_c0_g1_i1.p1
146102at6656	TRUE	40	100	FBpp0086269	TRINITY_DN25284_c0_g1_i1.p1	TRINITY_DN63317_c0_g1_i1.p1	TRINITY_DN46212_c1_g1_i1.p1	c81524_g2_i1.p1	SMAR012012-PA	TRINITY_DN15988_c0_g1_i1.p1	TRINITY_DN18418_c0_g1_i1.p1	TRINITY_DN2628_c0_g1_i1.p1	TRINITY_DN22840_c0_g1_i1.p1	TRINITY_DN23808_c0_g1_i1.p1	TRINITY_DN11820_c0_g1_i1.p1	TRINITY_DN4329_c0_g1_i1.p3	TRINITY_DN10736_c0_g1_i1.p1	TRINITY_DN3095_c0_g1_i1.p2	TRINITY_DN19888_c0_g1_i1.p1	TRINITY_DN7208_c87_g1_i1.p1	TRINITY_DN42547_c0_g1_i1.p1	TRINITY_DN75360_c0_g1_i1.p1	TRINITY_DN40320_c0_g2_i1.p1	TRINITY_DN55174_c0_g1_i1.p1	TRINITY_DN1482_c0_g2_i1.p1	TRINITY_DN5507_c0_g1_i1.p1	TRINITY_DN126_c0_g1_i1.p1	TRINITY_DN608_c0_g2_i1.p2	TRINITY_DN85420_c0_g1_i1.p1	TRINITY_DN1846_c0_g1_i8.p1	TRINITY_DN44681_c0_g1_i1.p3	TRINITY_DN31807_c0_g1_i1.p1	TRINITY_DN39584_c0_g1_i1.p1	TRINITY_DN226_c0_g1_i1.p1	TRINITY_DN24394_c0_g1_i1.p1	TRINITY_DN5891_c0_g5_i1.p1	TRINITY_DN790_c0_g1_i1.p1	TRINITY_DN2662_c1_g1_i1.p1	TRINITY_DN27632_c0_g1_i2.p1	TRINITY_DN44296_c0_g1_i1.p1	TRINITY_DN21328_c0_g1_i1.p1	TRINITY_DN89763_c1_g2_i1.p1	TRINITY_DN16242_c0_g1_i1.p1
146103at6656	TRUE	40	100	FBpp0077142	TRINITY_DN42001_c0_g1_i1.p1	TRINITY_DN44205_c0_g1_i1.p1	TRINITY_DN37485_c0_g1_i1.p1	c75181_g1_i1.p1	SMAR006824-PA	TRINITY_DN29171_c0_g2_i1.p1	TRINITY_DN84927_c0_g1_i1.p1	TRINITY_DN1608_c0_g1_i1.p2	TRINITY_DN13054_c0_g1_i1.p1	TRINITY_DN307_c0_g1_i1.p1	TRINITY_DN29093_c0_g1_i2.p1	TRINITY_DN396_c0_g1_i1.p1	TRINITY_DN30069_c0_g1_i2.p1	TRINITY_DN5932_c0_g1_i1.p1	TRINITY_DN14587_c0_g1_i1.p1	TRINITY_DN27542_c0_g1_i1.p1	TRINITY_DN54842_c0_g1_i1.p1	TRINITY_DN151206_c0_g1_i1.p1	TRINITY_DN38521_c0_g1_i1.p1	TRINITY_DN14472_c0_g1_i1.p1	TRINITY_DN4289_c0_g1_i1.p1	TRINITY_DN2859_c0_g1_i1.p1	TRINITY_DN13546_c0_g1_i1.p1	TRINITY_DN7336_c0_g1_i2.p1	TRINITY_DN52444_c0_g1_i1.p1	TRINITY_DN1960_c0_g3_i1.p1	TRINITY_DN6_c0_g1_i2.p1	TRINITY_DN3094_c0_g1_i3.p1	TRINITY_DN258_c0_g1_i15.p1	TRINITY_DN14733_c0_g1_i1.p1	TRINITY_DN2586_c0_g1_i1.p1	TRINITY_DN13649_c0_g1_i2.p1	TRINITY_DN19005_c0_g1_i1.p1	TRINITY_DN354_c0_g1_i1.p1	TRINITY_DN26774_c0_g1_i1.p1	TRINITY_DN23534_c0_g1_i1.p1	TRINITY_DN22838_c0_g1_i1.p1	TRINITY_DN117834_c0_g1_i1.p1	TRINITY_DN16104_c0_g1_i1.p1
150585at6656	FALSE	40	100	FBpp0084306	TRINITY_DN14773_c0_g2_i1.p1	TRINITY_DN21661_c0_g1_i1.p1	TRINITY_DN84097_c0_g1_i1.p1	c1904_g1_i1.p1	SMAR007372-PA	TRINITY_DN32085_c0_g1_i1.p1	TRINITY_DN7754_c0_g1_i1.p1	TRINITY_DN577_c0_g1_i3.p2	TRINITY_DN781_c0_g1_i2.p1	TRINITY_DN22_c0_g1_i1.p1	TRINITY_DN27183_c0_g1_i1.p1	TRINITY_DN35587_c0_g1_i1.p1	TRINITY_DN43912_c0_g1_i1.p1	TRINITY_DN189_c0_g2_i1.p1	TRINITY_DN23695_c0_g1_i1.p1	TRINITY_DN19530_c1_g1_i1.p1	TRINITY_DN65907_c0_g1_i1.p1	TRINITY_DN43716_c0_g1_i1.p1	TRINITY_DN42451_c0_g1_i1.p1	TRINITY_DN88_c0_g1_i1.p1	TRINITY_DN9743_c0_g1_i2.p2	TRINITY_DN47472_c0_g1_i2.p1	TRINITY_DN497_c0_g1_i1.p1	TRINITY_DN1923_c0_g3_i1.p2	TRINITY_DN5468_c0_g1_i2.p1	TRINITY_DN2433_c0_g1_i2.p2	TRINITY_DN30809_c0_g1_i1.p1	TRINITY_DN30858_c0_g1_i2.p1	TRINITY_DN1579_c0_g2_i1.p2	TRINITY_DN3176_c0_g1_i10.p1	TRINITY_DN12310_c0_g1_i1.p2	TRINITY_DN44841_c0_g1_i1.p1	TRINITY_DN1213_c0_g1_i4.p1	TRINITY_DN404_c0_g2_i3.p1	TRINITY_DN360_c0_g1_i3.p3	TRINITY_DN28682_c0_g1_i1.p1	TRINITY_DN46114_c0_g1_i1.p1	TRINITY_DN80276_c0_g1_i1.p1	TRINITY_DN2212_c0_g1_i1.p1
153534at6656	TRUE	40	100	FBpp0080102	TRINITY_DN6996_c0_g2_i1.p1	TRINITY_DN55727_c0_g1_i1.p1	TRINITY_DN36488_c0_g1_i1.p1	c183114_g1_i1.p1	SMAR008577-PA	TRINITY_DN3625_c0_g2_i1.p1	TRINITY_DN33838_c0_g1_i1.p1	TRINITY_DN5085_c0_g1_i1.p1	TRINITY_DN5150_c0_g1_i1.p1	TRINITY_DN332_c0_g1_i1.p1	TRINITY_DN29656_c0_g1_i1.p1	TRINITY_DN36205_c0_g1_i2.p1	TRINITY_DN1179_c0_g1_i2.p1	TRINITY_DN32596_c0_g1_i1.p1	TRINITY_DN3941_c0_g1_i1.p1	TRINITY_DN27059_c0_g1_i1.p1	TRINITY_DN59265_c0_g1_i1.p1	TRINITY_DN80207_c1_g2_i1.p1	TRINITY_DN45529_c0_g1_i1.p1	TRINITY_DN78773_c0_g1_i1.p1	TRINITY_DN7709_c0_g1_i1.p1	TRINITY_DN5769_c0_g1_i1.p1	TRINITY_DN1007_c0_g1_i1.p1	TRINITY_DN40830_c0_g1_i1.p2	TRINITY_DN943_c0_g1_i1.p1	TRINITY_DN42037_c0_g1_i1.p1	TRINITY_DN2394_c0_g2_i1.p1	TRINITY_DN5877_c0_g1_i1.p2	TRINITY_DN4527_c1_g1_i1.p1	TRINITY_DN941_c0_g3_i1.p1	TRINITY_DN34832_c0_g1_i1.p1	TRINITY_DN68360_c0_g1_i1.p1	TRINITY_DN11199_c0_g1_i1.p1	TRINITY_DN463_c0_g1_i1.p1	TRINITY_DN2186_c0_g1_i3.p2	TRINITY_DN1635_c0_g1_i1.p1	TRINITY_DN56801_c0_g1_i1.p1	TRINITY_DN87633_c11_g1_i1.p1	TRINITY_DN14366_c0_g1_i1.p1
154415at6656	TRUE	40	100	FBpp0072246	TRINITY_DN12449_c0_g1_i1.p1	TRINITY_DN39045_c0_g1_i1.p1	TRINITY_DN60180_c0_g1_i1.p1	c53382_g1_i1.p1	SMAR015053-PA	TRINITY_DN19298_c0_g1_i1.p1	TRINITY_DN19336_c0_g2_i1.p1	TRINITY_DN625_c0_g1_i1.p2	TRINITY_DN3506_c0_g1_i1.p1	TRINITY_DN4038_c0_g1_i1.p1	TRINITY_DN18750_c0_g1_i1.p1	TRINITY_DN43576_c0_g1_i1.p1	TRINITY_DN797_c0_g1_i1.p1	TRINITY_DN11118_c0_g1_i1.p1	TRINITY_DN17194_c0_g1_i1.p1	TRINITY_DN31085_c0_g2_i1.p3	TRINITY_DN64171_c0_g1_i1.p1	TRINITY_DN137232_c0_g1_i1.p1	TRINITY_DN47317_c0_g3_i2.p2	TRINITY_DN35053_c0_g1_i1.p1	TRINITY_DN42005_c0_g1_i1.p1	TRINITY_DN46845_c0_g1_i1.p1	TRINITY_DN164_c0_g1_i3.p1	TRINITY_DN461_c0_g1_i1.p1	TRINITY_DN88558_c0_g1_i1.p1	TRINITY_DN1673_c0_g1_i2.p1	TRINITY_DN4476_c0_g1_i1.p1	TRINITY_DN1731_c0_g1_i1.p1	TRINITY_DN8801_c0_g1_i1.p1	TRINITY_DN637_c0_g1_i1.p2	TRINITY_DN740_c1_g1_i1.p1	TRINITY_DN5531_c0_g1_i3.p2	TRINITY_DN26126_c0_g1_i1.p1	TRINITY_DN1857_c0_g1_i2.p1	TRINITY_DN17887_c0_g1_i1.p3	TRINITY_DN23301_c1_g1_i1.p1	TRINITY_DN28666_c1_g1_i1.p1	TRINITY_DN72667_c0_g1_i1.p1	TRINITY_DN3644_c0_g1_i1.p1
2456at6656	TRUE	40	100	FBpp0112471	TRINITY_DN18650_c0_g2_i1.p1	TRINITY_DN33409_c0_g1_i1.p1	TRINITY_DN51490_c0_g1_i1.p1	c99809_g1_i1.p1	SMAR007809-PA	TRINITY_DN29053_c0_g2_i1.p1	TRINITY_DN35477_c0_g1_i1.p1	TRINITY_DN4022_c0_g1_i3.p1	TRINITY_DN3828_c0_g1_i2.p1	TRINITY_DN31986_c0_g1_i1.p1	TRINITY_DN21621_c0_g1_i1.p1	TRINITY_DN12850_c0_g1_i1.p1	TRINITY_DN44924_c0_g1_i1.p1	TRINITY_DN1492_c0_g1_i4.p1	TRINITY_DN16665_c0_g1_i1.p1	TRINITY_DN19264_c0_g1_i1.p1	TRINITY_DN63281_c0_g1_i1.p1	TRINITY_DN86595_c1_g1_i2.p1	TRINITY_DN57830_c0_g1_i1.p1	TRINITY_DN82884_c0_g1_i1.p1	TRINITY_DN1298_c0_g1_i3.p1	TRINITY_DN38068_c0_g1_i1.p1	TRINITY_DN3801_c0_g2_i1.p1	TRINITY_DN11607_c0_g1_i2.p1	TRINITY_DN1249_c0_g3_i1.p1	TRINITY_DN6578_c0_g1_i1.p1	TRINITY_DN9370_c0_g1_i1.p1	TRINITY_DN4182_c0_g1_i1.p1	TRINITY_DN4545_c1_g1_i9.p2	TRINITY_DN4048_c0_g1_i2.p1	TRINITY_DN13689_c0_g1_i1.p1	TRINITY_DN4271_c0_g1_i2.p1	TRINITY_DN3570_c0_g1_i1.p1	TRINITY_DN23977_c0_g1_i1.p1	TRINITY_DN22735_c0_g1_i1.p1	TRINITY_DN24843_c0_g1_i1.p1	TRINITY_DN31956_c1_g3_i6.p1	TRINITY_DN92928_c0_g1_i2.p1	TRINITY_DN12443_c0_g1_i1.p1
32694at6656	TRUE	40	100	FBpp0086013	TRINITY_DN14721_c0_g1_i1.p1	TRINITY_DN30157_c0_g3_i1.p1	TRINITY_DN45528_c0_g1_i1.p1	c100885_g1_i1.p2	SMAR006439-PA	TRINITY_DN25904_c0_g2_i1.p1	TRINITY_DN14146_c0_g2_i1.p1	TRINITY_DN621_c0_g1_i1.p1	TRINITY_DN94_c0_g1_i7.p1	TRINITY_DN1511_c0_g1_i1.p1	TRINITY_DN84_c0_g1_i2.p1	TRINITY_DN411_c0_g1_i2.p1	TRINITY_DN66_c0_g1_i1.p1	TRINITY_DN31205_c0_g1_i1.p1	TRINITY_DN30723_c0_g1_i7.p1	TRINITY_DN32540_c0_g1_i5.p1	TRINITY_DN73739_c0_g1_i3.p1	TRINITY_DN84915_c0_g1_i2.p1	TRINITY_DN11389_c0_g1_i1.p1	TRINITY_DN49174_c0_g1_i1.p1	TRINITY_DN2800_c0_g1_i4.p1	TRINITY_DN2734_c0_g1_i1.p1	TRINITY_DN905_c0_g1_i1.p1	TRINITY_DN132_c0_g1_i2.p1	TRINITY_DN8702_c0_g2_i2.p1	TRINITY_DN1441_c0_g1_i7.p1	TRINITY_DN5783_c0_g1_i2.p1	TRINITY_DN3252_c1_g1_i4.p1	TRINITY_DN2952_c0_g1_i11.p1	TRINITY_DN193_c0_g1_i2.p1	TRINITY_DN5902_c0_g1_i1.p1	TRINITY_DN872_c0_g1_i24.p1	TRINITY_DN698_c0_g1_i1.p1	TRINITY_DN1907_c0_g1_i12.p1	TRINITY_DN101_c0_g1_i7.p1	TRINITY_DN14876_c0_g1_i1.p1	TRINITY_DN31532_c0_g2_i1.p1	TRINITY_DN12554_c0_g1_i1.p1	TRINITY_DN13415_c0_g1_i1.p1
50740at6656	FALSE	40	100	FBpp0087958	TRINITY_DN18021_c0_g2_i1.p1	TRINITY_DN21637_c0_g4_i1.p1	TRINITY_DN49934_c0_g1_i1.p1	c96935_g5_i2.p1	SMAR001914-PA	TRINITY_DN22977_c0_g3_i2.p1	TRINITY_DN34756_c0_g3_i1.p1	TRINITY_DN3037_c0_g1_i5.p1	TRINITY_DN2702_c0_g1_i2.p1	TRINITY_DN4000_c0_g1_i2.p1	TRINITY_DN11457_c0_g1_i2.p1	TRINITY_DN1484_c0_g2_i1.p1	TRINITY_DN23165_c0_g1_i1.p1	TRINITY_DN26863_c0_g1_i1.p1	TRINITY_DN15395_c0_g2_i1.p1	TRINITY_DN32300_c14_g10_i2.p1	TRINITY_DN72995_c0_g2_i1.p1	TRINITY_DN77298_c1_g2_i1.p1	TRINITY_DN64758_c0_g1_i1.p1	TRINITY_DN4657_c0_g1_i1.p1	TRINITY_DN3561_c2_g2_i1.p1	TRINITY_DN11734_c0_g1_i1.p1	TRINITY_DN22141_c0_g1_i1.p1	TRINITY_DN8031_c0_g1_i3.p1	TRINITY_DN36124_c0_g1_i1.p1	TRINITY_DN7923_c0_g1_i12.p1	TRINITY_DN1380_c0_g2_i1.p1	TRINITY_DN2868_c0_g1_i1.p1	TRINITY_DN9798_c0_g1_i2.p1	TRINITY_DN2974_c0_g1_i1.p1	TRINITY_DN1738_c0_g1_i1.p1	TRINITY_DN7876_c0_g1_i2.p1	TRINITY_DN11477_c0_g1_i1.p1	TRINITY_DN3889_c0_g2_i7.p1	TRINITY_DN3087_c0_g1_i1.p1	TRINITY_DN25495_c0_g3_i6.p1	TRINITY_DN31050_c0_g1_i3.p1	TRINITY_DN89449_c5_g5_i2.p1	TRINITY_DN1824_c0_g1_i1.p1
53298at6656	FALSE	40	100	FBpp0070395	TRINITY_DN13150_c0_g1_i1.p1	TRINITY_DN31813_c0_g1_i2.p1	TRINITY_DN49200_c1_g2_i2.p1	c96330_g1_i1.p1	SMAR005908-PA	TRINITY_DN23867_c0_g5_i1.p1	TRINITY_DN43146_c0_g1_i3.p1	TRINITY_DN2336_c0_g1_i3.p1	TRINITY_DN3327_c0_g1_i2.p1	TRINITY_DN895_c0_g1_i7.p1	TRINITY_DN16582_c0_g1_i2.p1	TRINITY_DN15618_c0_g1_i1.p1	TRINITY_DN53019_c0_g1_i1.p1	TRINITY_DN3616_c0_g1_i1.p1	TRINITY_DN24858_c0_g1_i2.p1	TRINITY_DN31979_c1_g3_i3.p1	TRINITY_DN73526_c0_g1_i1.p1	TRINITY_DN82453_c0_g1_i2.p1	TRINITY_DN47620_c0_g1_i2.p1	TRINITY_DN69884_c0_g1_i1.p1	TRINITY_DN1316_c0_g1_i3.p1	TRINITY_DN214_c0_g1_i1.p1	TRINITY_DN2948_c0_g1_i3.p1	TRINITY_DN436_c0_g1_i1.p1	TRINITY_DN4043_c2_g1_i1.p1	TRINITY_DN8258_c0_g1_i3.p1	TRINITY_DN1316_c0_g1_i1.p1	TRINITY_DN1120_c0_g1_i4.p1	TRINITY_DN691_c0_g2_i31.p1	TRINITY_DN2692_c0_g1_i3.p1	TRINITY_DN5619_c0_g1_i1.p1	TRINITY_DN1402_c0_g1_i3.p1	TRINITY_DN2270_c0_g1_i3.p1	TRINITY_DN530_c0_g1_i3.p2	TRINITY_DN2267_c0_g1_i5.p1	TRINITY_DN25817_c0_g1_i2.p1	TRINITY_DN31118_c0_g1_i2.p1	TRINITY_DN92821_c3_g1_i1.p1	TRINITY_DN12876_c0_g1_i1.p1
55450at6656	TRUE	40	100	FBpp0071279	TRINITY_DN4699_c0_g1_i1.p1	TRINITY_DN61786_c0_g1_i1.p1	TRINITY_DN47368_c0_g1_i1.p1	c34051_g1_i1.p1	SMAR000991-PA	TRINITY_DN19600_c0_g1_i1.p1	TRINITY_DN16047_c0_g2_i1.p1	TRINITY_DN1137_c0_g1_i2.p1	TRINITY_DN26248_c0_g1_i1.p1	TRINITY_DN2442_c0_g1_i1.p1	TRINITY_DN575_c0_g1_i1.p1	TRINITY_DN33998_c0_g1_i1.p1	TRINITY_DN4682_c0_g1_i1.p1	TRINITY_DN10310_c0_g1_i1.p1	TRINITY_DN32366_c0_g1_i1.p1	TRINITY_DN19971_c0_g1_i1.p1	TRINITY_DN49392_c0_g1_i1.p1	TRINITY_DN71529_c0_g1_i1.p1	TRINITY_DN31287_c0_g1_i1.p1	TRINITY_DN82347_c0_g1_i1.p1	TRINITY_DN425_c0_g1_i1.p1	TRINITY_DN23927_c0_g1_i1.p1	TRINITY_DN2677_c0_g1_i1.p1	TRINITY_DN0_c0_g1_i1.p1	TRINITY_DN87954_c0_g1_i1.p1	TRINITY_DN51840_c0_g1_i1.p1	TRINITY_DN3608_c0_g1_i1.p1	TRINITY_DN2121_c0_g1_i11.p1	TRINITY_DN3152_c1_g1_i7.p1	TRINITY_DN18735_c0_g1_i2.p1	TRINITY_DN943_c0_g1_i1.p1	TRINITY_DN712_c0_g1_i5.p1	TRINITY_DN12_c0_g2_i1.p1	TRINITY_DN1559_c0_g1_i3.p1	TRINITY_DN9275_c0_g1_i1.p1	TRINITY_DN17602_c0_g1_i1.p1	TRINITY_DN3512_c0_g1_i1.p2	TRINITY_DN82962_c0_g1_i1.p1	TRINITY_DN14259_c0_g1_i1.p1
5616at6656	TRUE	40	100	FBpp0077728	TRINITY_DN16728_c0_g1_i1.p1	TRINITY_DN30233_c0_g1_i2.p1	TRINITY_DN51446_c4_g2_i1.p1	c98764_g3_i1.p1	SMAR005248-PA	TRINITY_DN24454_c0_g7_i3.p1	TRINITY_DN42076_c0_g5_i2.p1	TRINITY_DN2135_c0_g1_i2.p1	TRINITY_DN749_c0_g1_i8.p1	TRINITY_DN10814_c0_g1_i1.p1	TRINITY_DN1057_c0_g1_i4.p1	TRINITY_DN3327_c0_g1_i6.p1	TRINITY_DN5446_c0_g1_i1.p1	TRINITY_DN2974_c1_g1_i1.p1	TRINITY_DN19927_c0_g1_i1.p1	TRINITY_DN22148_c7_g1_i1.p1	TRINITY_DN71480_c1_g1_i1.p1	TRINITY_DN85857_c2_g1_i1.p1	TRINITY_DN43934_c0_g1_i1.p1	TRINITY_DN71257_c0_g1_i1.p1	TRINITY_DN316_c1_g2_i1.p1	TRINITY_DN2104_c0_g1_i1.p1	TRINITY_DN2208_c0_g1_i8.p1	TRINITY_DN986_c0_g1_i1.p1	TRINITY_DN2194_c0_g1_i3.p1	TRINITY_DN486_c0_g1_i1.p1	TRINITY_DN657_c0_g1_i4.p1	TRINITY_DN800_c0_g1_i9.p1	TRINITY_DN1935_c0_g1_i44.p1	TRINITY_DN109_c0_g1_i3.p1	TRINITY_DN32070_c0_g1_i1.p1	TRINITY_DN2362_c0_g1_i8.p1	TRINITY_DN2197_c0_g1_i6.p1	TRINITY_DN1664_c0_g1_i13.p1	TRINITY_DN898_c0_g1_i4.p1	TRINITY_DN25746_c0_g3_i2.p1	TRINITY_DN51329_c0_g1_i1.p1	TRINITY_DN90703_c0_g1_i1.p1	TRINITY_DN15478_c0_g2_i1.p1
59681at6656	FALSE	40	100	FBpp0302793	TRINITY_DN53999_c0_g1_i1.p1	TRINITY_DN22446_c0_g1_i1.p1	TRINITY_DN42434_c0_g1_i1.p1	c99881_g1_i2.p1	SMAR011566-PA	TRINITY_DN23124_c0_g2_i1.p1	TRINITY_DN7756_c0_g1_i2.p1	TRINITY_DN7077_c0_g1_i3.p1	TRINITY_DN563_c0_g1_i1.p1	TRINITY_DN3571_c0_g1_i1.p1	TRINITY_DN33203_c0_g1_i2.p1	TRINITY_DN35255_c0_g1_i1.p1	TRINITY_DN25_c0_g1_i16.p1	TRINITY_DN1744_c0_g3_i1.p1	TRINITY_DN15240_c16_g3_i1.p1	TRINITY_DN22952_c1_g1_i1.p1	TRINITY_DN66768_c0_g1_i1.p1	TRINITY_DN77406_c0_g2_i3.p1	TRINITY_DN47355_c1_g1_i2.p1	TRINITY_DN62557_c4_g1_i4.p2	TRINITY_DN16167_c1_g1_i1.p1	TRINITY_DN2828_c1_g2_i1.p2	TRINITY_DN2149_c0_g1_i7.p1	TRINITY_DN3903_c0_g2_i2.p1	TRINITY_DN1249_c0_g1_i15.p1	TRINITY_DN3301_c0_g1_i1.p1	TRINITY_DN6658_c0_g1_i1.p1	TRINITY_DN3304_c0_g1_i4.p1	TRINITY_DN6203_c0_g1_i4.p1	TRINITY_DN4641_c0_g1_i2.p1	TRINITY_DN1881_c0_g1_i1.p1	TRINITY_DN18655_c0_g1_i1.p1	TRINITY_DN5380_c0_g1_i1.p1	TRINITY_DN2425_c0_g1_i17.p1	TRINITY_DN993_c0_g1_i2.p1	TRINITY_DN17388_c0_g1_i2.p1	TRINITY_DN31022_c1_g1_i6.p1	TRINITY_DN84274_c0_g1_i1.p1	TRINITY_DN11631_c1_g1_i1.p1
65508at6656	TRUE	40	100	FBpp0072135	TRINITY_DN8221_c0_g2_i1.p1	TRINITY_DN30919_c0_g1_i1.p1	TRINITY_DN51099_c0_g3_i1.p1	c98333_g7_i1.p1	SMAR006925-PA	TRINITY_DN24847_c0_g2_i2.p1	TRINITY_DN41481_c0_g1_i1.p1	TRINITY_DN694_c0_g1_i2.p1	TRINITY_DN11652_c0_g1_i1.p1	TRINITY_DN5464_c0_g1_i1.p1	TRINITY_DN1926_c0_g1_i1.p1	TRINITY_DN1656_c0_g1_i2.p1	TRINITY_DN2450_c0_g1_i1.p1	TRINITY_DN31365_c0_g1_i1.p1	TRINITY_DN29213_c0_g2_i1.p1	TRINITY_DN27278_c0_g1_i1.p1	TRINITY_DN113778_c0_g1_i1.p1	TRINITY_DN84376_c0_g1_i1.p1	TRINITY_DN9338_c0_g1_i1.p1	TRINITY_DN55127_c0_g2_i1.p1	TRINITY_DN13680_c0_g1_i17.p1	TRINITY_DN500_c0_g1_i1.p1	TRINITY_DN453_c0_g1_i1.p1	TRINITY_DN3747_c0_g2_i8.p1	TRINITY_DN742_c0_g1_i1.p1	TRINITY_DN2142_c0_g1_i1.p1	TRINITY_DN3539_c0_g2_i2.p1	TRINITY_DN683_c0_g1_i1.p3	TRINITY_DN1218_c0_g1_i1.p1	TRINITY_DN1791_c0_g1_i1.p1	TRINITY_DN4088_c0_g1_i1.p1	TRINITY_DN11132_c0_g1_i13.p1	TRINITY_DN2344_c0_g1_i1.p1	TRINITY_DN1111_c0_g1_i5.p1	TRINITY_DN2780_c0_g1_i1.p1	TRINITY_DN31414_c0_g1_i1.p1	TRINITY_DN27141_c0_g1_i1.p1	TRINITY_DN84489_c2_g1_i1.p1	TRINITY_DN13663_c0_g1_i1.p1
74836at6656	FALSE	40	100	FBpp0082352	TRINITY_DN39618_c0_g1_i1.p1	TRINITY_DN4873_c0_g2_i1.p1	TRINITY_DN49826_c0_g1_i1.p1	c84563_g1_i1.p1	SMAR002284-PA	TRINITY_DN24898_c0_g2_i2.p1	TRINITY_DN35922_c0_g1_i1.p1	TRINITY_DN6505_c0_g1_i2.p1	TRINITY_DN4699_c0_g1_i2.p1	TRINITY_DN499_c0_g1_i1.p1	TRINITY_DN32566_c0_g1_i1.p1	TRINITY_DN42155_c0_g1_i1.p1	TRINITY_DN30704_c0_g1_i1.p1	TRINITY_DN4524_c0_g1_i1.p1	TRINITY_DN26870_c0_g1_i1.p1	TRINITY_DN31424_c0_g1_i6.p1	TRINITY_DN61619_c1_g1_i1.p3	TRINITY_DN82522_c0_g1_i2.p1	TRINITY_DN43864_c0_g1_i1.p1	TRINITY_DN58882_c0_g2_i1.p1	TRINITY_DN14557_c0_g3_i1.p1	TRINITY_DN38195_c0_g1_i1.p1	TRINITY_DN16957_c0_g1_i1.p1	TRINITY_DN41100_c0_g1_i1.p1	TRINITY_DN3880_c0_g2_i1.p1	TRINITY_DN31141_c0_g1_i1.p1	TRINITY_DN2205_c0_g1_i2.p1	TRINITY_DN4412_c0_g1_i5.p1	TRINITY_DN713_c0_g3_i6.p1	TRINITY_DN1675_c0_g1_i4.p1	TRINITY_DN1457_c0_g1_i1.p1	TRINITY_DN3018_c0_g1_i1.p1	TRINITY_DN5404_c0_g1_i1.p1	TRINITY_DN8246_c0_g1_i1.p1	TRINITY_DN24221_c0_g1_i3.p1	TRINITY_DN22373_c0_g1_i2.p1	TRINITY_DN31546_c2_g10_i8.p1	TRINITY_DN89945_c0_g1_i4.p1	TRINITY_DN10253_c0_g1_i1.p1
90931at6656	TRUE	40	100	FBpp0084761	TRINITY_DN80923_c0_g1_i1.p1	TRINITY_DN31684_c0_g2_i1.p2	TRINITY_DN52029_c1_g1_i1.p1	c34113_g1_i1.p1	SMAR015365-PA	TRINITY_DN13778_c1_g1_i1.p1	TRINITY_DN31703_c0_g1_i1.p1	TRINITY_DN131_c0_g1_i1.p1	TRINITY_DN26291_c0_g1_i1.p1	TRINITY_DN3143_c0_g1_i1.p1	TRINITY_DN76_c0_g1_i1.p1	TRINITY_DN3929_c0_g2_i5.p1	TRINITY_DN10711_c0_g2_i1.p1	TRINITY_DN31260_c0_g1_i1.p1	TRINITY_DN1322_c0_g1_i1.p1	TRINITY_DN30426_c11_g1_i1.p1	TRINITY_DN60472_c0_g1_i1.p2	TRINITY_DN67453_c0_g1_i1.p1	TRINITY_DN61068_c0_g1_i1.p1	TRINITY_DN27580_c0_g1_i1.p1	TRINITY_DN268_c0_g1_i2.p1	TRINITY_DN4409_c0_g1_i1.p1	TRINITY_DN589_c0_g1_i1.p1	TRINITY_DN793_c0_g1_i1.p1	TRINITY_DN41_c0_g1_i2.p1	TRINITY_DN653_c0_g1_i3.p1	TRINITY_DN1288_c0_g2_i1.p1	TRINITY_DN132_c0_g1_i3.p1	TRINITY_DN2651_c0_g1_i3.p1	TRINITY_DN408_c0_g1_i1.p1	TRINITY_DN21_c0_g1_i1.p1	TRINITY_DN7914_c0_g1_i1.p1	TRINITY_DN3266_c0_g1_i1.p1	TRINITY_DN2728_c0_g1_i2.p2	TRINITY_DN376_c0_g1_i1.p1	TRINITY_DN22490_c0_g1_i1.p1	TRINITY_DN28610_c0_g1_i1.p1	TRINITY_DN70485_c0_g1_i1.p1	TRINITY_DN13685_c0_g1_i1.p1
91002at6656	TRUE	40	100	FBpp0110421	TRINITY_DN53646_c0_g1_i1.p1	TRINITY_DN43426_c0_g1_i1.p2	TRINITY_DN71932_c0_g1_i1.p1	c166569_g1_i1.p1	SMAR003483-PA	TRINITY_DN11236_c0_g2_i1.p1	TRINITY_DN120882_c2_g1_i1.p1	TRINITY_DN19008_c0_g1_i1.p1	TRINITY_DN5209_c0_g1_i1.p1	TRINITY_DN374_c0_g1_i2.p1	TRINITY_DN32064_c0_g1_i1.p1	TRINITY_DN16579_c1_g1_i1.p1	TRINITY_DN3179_c0_g1_i1.p1	TRINITY_DN5416_c0_g1_i1.p1	TRINITY_DN18838_c0_g2_i1.p1	TRINITY_DN16556_c2_g1_i1.p1	TRINITY_DN71001_c0_g1_i1.p1	TRINITY_DN79967_c0_g1_i1.p1	TRINITY_DN41964_c0_g3_i1.p1	TRINITY_DN55490_c0_g1_i1.p1	TRINITY_DN3324_c0_g1_i1.p2	TRINITY_DN38119_c0_g1_i1.p1	TRINITY_DN278_c0_g1_i1.p1	TRINITY_DN1196_c0_g1_i1.p1	TRINITY_DN1258_c0_g1_i1.p1	TRINITY_DN571_c0_g1_i1.p1	TRINITY_DN7422_c0_g1_i1.p1	TRINITY_DN329_c0_g1_i1.p1	TRINITY_DN3387_c0_g1_i1.p1	TRINITY_DN4111_c0_g1_i2.p1	TRINITY_DN3168_c0_g1_i1.p2	TRINITY_DN1701_c0_g1_i1.p1	TRINITY_DN19041_c0_g1_i1.p1	TRINITY_DN729_c0_g1_i4.p1	TRINITY_DN2065_c0_g1_i1.p1	TRINITY_DN847_c0_g1_i1.p1	TRINITY_DN28688_c0_g1_i1.p1	TRINITY_DN85785_c0_g2_i1.p1	TRINITY_DN7396_c0_g1_i1.p1
99519at6656	TRUE	40	100	FBpp0084617	TRINITY_DN838_c0_g1_i1.p1	TRINITY_DN61698_c0_g1_i1.p1	TRINITY_DN49277_c0_g2_i1.p1	c76587_g1_i2.p1	SMAR006896-PA	TRINITY_DN2759_c0_g1_i1.p1	TRINITY_DN34232_c1_g1_i1.p2	TRINITY_DN248_c0_g1_i1.p1	TRINITY_DN119_c0_g1_i5.p1	TRINITY_DN1559_c0_g1_i1.p1	TRINITY_DN11593_c0_g1_i1.p1	TRINITY_DN1363_c0_g1_i1.p1	TRINITY_DN53644_c0_g1_i1.p1	TRINITY_DN1891_c0_g1_i1.p1	TRINITY_DN25978_c0_g1_i1.p1	TRINITY_DN7291_c1_g1_i1.p1	TRINITY_DN89815_c0_g1_i1.p1	TRINITY_DN81225_c0_g1_i1.p1	TRINITY_DN46722_c0_g4_i1.p1	TRINITY_DN78254_c0_g1_i1.p1	TRINITY_DN1165_c0_g1_i1.p1	TRINITY_DN861_c0_g1_i14.p1	TRINITY_DN2495_c0_g1_i1.p1	TRINITY_DN5827_c0_g1_i1.p1	TRINITY_DN936_c0_g1_i2.p1	TRINITY_DN1956_c0_g1_i1.p1	TRINITY_DN1686_c0_g2_i1.p1	TRINITY_DN1057_c0_g1_i1.p2	TRINITY_DN3901_c0_g3_i2.p1	TRINITY_DN210_c0_g1_i1.p1	TRINITY_DN3542_c0_g1_i1.p1	TRINITY_DN413_c0_g1_i4.p1	TRINITY_DN1043_c6_g1_i1.p1	TRINITY_DN9_c0_g1_i5.p1	TRINITY_DN18191_c0_g1_i1.p1	TRINITY_DN471_c0_g1_i1.p1	TRINITY_DN30200_c0_g1_i1.p1	TRINITY_DN71456_c0_g1_i1.p1	TRINITY_DN9767_c0_g1_i2.p1
103479at6656	TRUE	40	100	FBpp0081434	TRINITY_DN18367_c0_g2_i1.p1	TRINITY_DN19174_c0_g1_i1.p1	TRINITY_DN52633_c0_g4_i1.p1	c91800_g2_i2.p1	SMAR015677-PA	TRINITY_DN23078_c0_g2_i1.p1	TRINITY_DN41336_c0_g2_i1.p1	TRINITY_DN4471_c0_g1_i1.p1	TRINITY_DN8964_c0_g1_i7.p3	TRINITY_DN4009_c0_g1_i3.p1	TRINITY_DN743_c0_g1_i1.p1	TRINITY_DN3182_c0_g1_i2.p1	TRINITY_DN24366_c0_g1_i1.p1	TRINITY_DN6761_c0_g1_i1.p1	TRINITY_DN22333_c0_g2_i1.p1	TRINITY_DN28347_c1_g1_i1.p2	TRINITY_DN58852_c0_g1_i2.p1	TRINITY_DN88141_c0_g1_i2.p1	TRINITY_DN45499_c0_g4_i1.p1	TRINITY_DN34166_c1_g1_i1.p1	TRINITY_DN3751_c0_g1_i4.p1	TRINITY_DN12512_c0_g1_i3.p1	TRINITY_DN3575_c0_g1_i1.p1	TRINITY_DN15776_c0_g1_i3.p2	TRINITY_DN1870_c0_g1_i1.p2	TRINITY_DN3448_c0_g1_i2.p2	TRINITY_DN21412_c0_g1_i2.p1	TRINITY_DN5519_c0_g1_i1.p1	TRINITY_DN14424_c0_g1_i25.p1	TRINITY_DN3375_c0_g1_i1.p2	TRINITY_DN6330_c0_g1_i2.p1	TRINITY_DN6397_c0_g1_i7.p1	TRINITY_DN1312_c0_g1_i6.p3	TRINITY_DN6916_c0_g1_i5.p1	TRINITY_DN2506_c0_g1_i2.p2	TRINITY_DN18898_c0_g1_i1.p1	TRINITY_DN31269_c0_g2_i9.p1	TRINITY_DN19294_c0_g1_i1.p1	TRINITY_DN5817_c0_g1_i1.p1
103908at6656	TRUE	40	100	FBpp0086705	TRINITY_DN76611_c0_g1_i1.p1	TRINITY_DN14778_c0_g2_i1.p1	TRINITY_DN46402_c0_g1_i1.p1	c95209_g2_i1.p1	SMAR005822-PA	TRINITY_DN20624_c1_g4_i1.p1	TRINITY_DN50907_c0_g1_i1.p1	TRINITY_DN5907_c0_g1_i2.p2	TRINITY_DN15241_c0_g1_i1.p1	TRINITY_DN25626_c0_g1_i1.p1	TRINITY_DN776_c0_g1_i1.p1	TRINITY_DN16439_c0_g1_i1.p1	TRINITY_DN17896_c0_g1_i2.p1	TRINITY_DN458_c0_g1_i1.p1	TRINITY_DN27837_c0_g1_i2.p1	TRINITY_DN30939_c6_g1_i2.p2	TRINITY_DN63784_c0_g1_i1.p1	TRINITY_DN78327_c0_g2_i1.p1	TRINITY_DN42181_c0_g2_i1.p1	TRINITY_DN71583_c0_g1_i1.p1	TRINITY_DN1446_c0_g1_i2.p1	TRINITY_DN13637_c0_g1_i1.p1	TRINITY_DN25245_c0_g1_i1.p1	TRINITY_DN3159_c0_g1_i1.p1	TRINITY_DN19005_c0_g1_i1.p1	TRINITY_DN50592_c0_g1_i1.p1	TRINITY_DN3363_c0_g1_i1.p1	TRINITY_DN3272_c0_g1_i1.p1	TRINITY_DN6652_c0_g1_i1.p1	TRINITY_DN6122_c0_g1_i1.p1	TRINITY_DN9777_c1_g1_i1.p1	TRINITY_DN1700_c0_g1_i2.p1	TRINITY_DN3119_c0_g1_i1.p1	TRINITY_DN12595_c0_g1_i3.p1	TRINITY_DN18471_c0_g1_i1.p1	TRINITY_DN25767_c1_g2_i1.p1	TRINITY_DN29093_c0_g1_i2.p1	TRINITY_DN86349_c0_g2_i1.p1	TRINITY_DN5687_c0_g1_i1.p1
104410at6656	TRUE	40	100	FBpp0078532	TRINITY_DN100_c0_g1_i1.p1	TRINITY_DN45613_c0_g1_i1.p1	TRINITY_DN47120_c0_g1_i1.p2	c61412_g1_i1.p1	SMAR010932-PA	TRINITY_DN21485_c0_g3_i1.p1	TRINITY_DN85197_c0_g1_i1.p1	TRINITY_DN1560_c0_g1_i1.p1	TRINITY_DN957_c0_g1_i14.p1	TRINITY_DN1681_c0_g1_i4.p1	TRINITY_DN33457_c0_g1_i1.p1	TRINITY_DN637_c0_g1_i1.p1	TRINITY_DN32197_c0_g1_i1.p1	TRINITY_DN638_c0_g1_i14.p1	TRINITY_DN37536_c0_g1_i1.p1	TRINITY_DN38250_c2_g1_i1.p1	TRINITY_DN55675_c2_g1_i1.p1	TRINITY_DN71715_c0_g2_i2.p1	TRINITY_DN26226_c0_g2_i1.p1	TRINITY_DN79388_c0_g1_i1.p1	TRINITY_DN1637_c0_g1_i1.p1	TRINITY_DN13957_c0_g1_i1.p1	TRINITY_DN17504_c0_g1_i1.p1	TRINITY_DN4030_c0_g1_i1.p1	TRINITY_DN74210_c0_g1_i1.p1	TRINITY_DN4042_c0_g1_i1.p1	TRINITY_DN1626_c0_g1_i1.p1	TRINITY_DN1751_c0_g1_i1.p1	TRINITY_DN6801_c0_g1_i1.p1	TRINITY_DN5285_c0_g1_i1.p1	TRINITY_DN23038_c0_g1_i1.p1	TRINITY_DN3400_c0_g1_i1.p1	TRINITY_DN856_c0_g1_i4.p1	TRINITY_DN1667_c0_g1_i2.p1	TRINITY_DN2214_c0_g1_i1.p1	TRINITY_DN35934_c0_g1_i1.p1	TRINITY_DN24511_c0_g1_i1.p1	TRINITY_DN39823_c0_g2_i1.p1	TRINITY_DN5906_c0_g1_i1.p1
108207at6656	TRUE	40	100	FBpp0079711	TRINITY_DN28427_c0_g1_i1.p1	TRINITY_DN28534_c0_g1_i1.p2	TRINITY_DN71536_c0_g1_i1.p1	c79897_g1_i1.p1	SMAR003975-PA	TRINITY_DN20210_c0_g2_i1.p1	TRINITY_DN26410_c0_g1_i1.p1	TRINITY_DN4059_c0_g1_i1.p1	TRINITY_DN24173_c0_g1_i1.p1	TRINITY_DN359_c0_g1_i1.p1	TRINITY_DN561_c0_g1_i1.p1	TRINITY_DN11532_c0_g1_i1.p1	TRINITY_DN7176_c0_g1_i1.p1	TRINITY_DN3091_c0_g1_i1.p1	TRINITY_DN27268_c0_g1_i1.p1	TRINITY_DN25680_c0_g1_i1.p1	TRINITY_DN72388_c0_g1_i1.p1	TRINITY_DN65116_c1_g1_i1.p1	TRINITY_DN46486_c0_g1_i1.p1	TRINITY_DN37673_c0_g1_i1.p1	TRINITY_DN46827_c0_g1_i1.p1	TRINITY_DN33718_c0_g1_i1.p1	TRINITY_DN1826_c0_g1_i1.p1	TRINITY_DN7884_c0_g1_i1.p1	TRINITY_DN8212_c0_g1_i1.p1	TRINITY_DN8767_c0_g1_i7.p1	TRINITY_DN1099_c0_g1_i4.p1	TRINITY_DN2233_c0_g2_i1.p1	TRINITY_DN2295_c0_g1_i5.p1	TRINITY_DN24464_c0_g1_i1.p1	TRINITY_DN296_c0_g2_i1.p1	TRINITY_DN10025_c0_g1_i3.p1	TRINITY_DN3884_c0_g1_i4.p1	TRINITY_DN4092_c0_g1_i1.p1	TRINITY_DN18465_c0_g1_i2.p1	TRINITY_DN16693_c0_g1_i1.p1	TRINITY_DN30031_c5_g3_i1.p1	TRINITY_DN86944_c1_g4_i1.p1	TRINITY_DN15574_c0_g1_i1.p1
135075at6656	TRUE	40	100	FBpp0079328	TRINITY_DN42701_c0_g1_i1.p1	TRINITY_DN43429_c0_g1_i1.p1	TRINITY_DN40771_c0_g1_i1.p1	c118484_g1_i1.p1	SMAR007244-PA	TRINITY_DN19396_c0_g1_i1.p1	TRINITY_DN49363_c2_g1_i1.p1	TRINITY_DN11788_c0_g1_i1.p1	TRINITY_DN15548_c0_g1_i1.p1	TRINITY_DN5553_c0_g1_i2.p1	TRINITY_DN28482_c0_g1_i1.p1	TRINITY_DN34689_c0_g1_i1.p1	TRINITY_DN46454_c0_g1_i1.p1	TRINITY_DN22377_c0_g1_i1.p1	TRINITY_DN48921_c0_g1_i1.p1	TRINITY_DN38225_c0_g3_i1.p1	TRINITY_DN13751_c0_g1_i1.p1	TRINITY_DN78971_c0_g1_i1.p1	TRINITY_DN16458_c0_g1_i1.p1	TRINITY_DN79211_c0_g1_i1.p1	TRINITY_DN25015_c0_g1_i1.p1	TRINITY_DN33575_c0_g1_i1.p1	TRINITY_DN732_c0_g1_i1.p1	TRINITY_DN888_c0_g1_i2.p1	TRINITY_DN873_c0_g1_i1.p1	TRINITY_DN1486_c0_g1_i1.p1	TRINITY_DN3408_c0_g1_i2.p1	TRINITY_DN25770_c0_g1_i1.p1	TRINITY_DN7785_c0_g1_i1.p1	TRINITY_DN3601_c0_g1_i1.p1	TRINITY_DN29688_c0_g1_i1.p1	TRINITY_DN74962_c0_g1_i1.p1	TRINITY_DN1100_c0_g2_i1.p6	TRINITY_DN204_c0_g1_i17.p2	TRINITY_DN22870_c0_g1_i1.p1	TRINITY_DN6614_c0_g1_i1.p1	TRINITY_DN40298_c0_g1_i1.p1	TRINITY_DN67584_c0_g1_i1.p1	TRINITY_DN13764_c0_g1_i1.p1
109444at6656	FALSE	39	97.5	FBpp0087352	TRINITY_DN11979_c0_g1_i1.p1	TRINITY_DN23699_c0_g1_i1.p1	TRINITY_DN60853_c0_g1_i1.p1	c97114_g4_i2.p2	SMAR010189-PA	TRINITY_DN13064_c0_g2_i1.p1	TRINITY_DN41568_c1_g1_i1.p1	TRINITY_DN37246_c0_g1_i1.p1	TRINITY_DN1942_c0_g1_i1.p1	TRINITY_DN3417_c0_g1_i1.p1	TRINITY_DN3968_c0_g1_i1.p1	TRINITY_DN6902_c0_g1_i1.p1	TRINITY_DN10424_c0_g1_i1.p1	TRINITY_DN5168_c0_g1_i1.p1	TRINITY_DN16937_c0_g1_i2.p1	TRINITY_DN33504_c5_g2_i7.p1	TRINITY_DN30720_c0_g2_i1.p1	TRINITY_DN43737_c0_g2_i1.p1		TRINITY_DN407_c0_g1_i1.p1	TRINITY_DN10093_c0_g1_i1.p1	TRINITY_DN1356_c0_g2_i1.p1	TRINITY_DN559_c0_g1_i7.p1	TRINITY_DN43196_c0_g1_i1.p1	TRINITY_DN23273_c0_g1_i1.p1	TRINITY_DN1453_c0_g2_i1.p1	TRINITY_DN3916_c0_g1_i3.p1	TRINITY_DN1998_c0_g1_i15.p1	TRINITY_DN40_c0_g1_i5.p1	TRINITY_DN2187_c0_g1_i1.p1	TRINITY_DN396_c0_g1_i5.p1	TRINITY_DN5083_c1_g1_i1.p1	TRINITY_DN183_c0_g1_i1.p1	TRINITY_DN568_c0_g1_i3.p1	TRINITY_DN1565_c0_g1_i2.p1	TRINITY_DN25782_c1_g4_i1.p1	TRINITY_DN27867_c0_g1_i1.p1	TRINITY_DN89892_c3_g2_i1.p1	TRINITY_DN11494_c1_g1_i1.p1
135373at6656	TRUE	40	100	FBpp0078694	TRINITY_DN10905_c0_g3_i1.p2	TRINITY_DN33310_c0_g1_i1.p2	TRINITY_DN47928_c0_g1_i1.p2	c80826_g1_i1.p1	SMAR000495-PA	TRINITY_DN22268_c0_g2_i1.p1	TRINITY_DN107789_c0_g1_i1.p1	TRINITY_DN5507_c0_g1_i14.p2	TRINITY_DN1979_c0_g1_i1.p1	TRINITY_DN1692_c0_g1_i1.p1	TRINITY_DN22810_c0_g1_i2.p1	TRINITY_DN5035_c0_g1_i2.p1	TRINITY_DN240_c0_g1_i1.p1	TRINITY_DN3448_c0_g1_i3.p2	TRINITY_DN27780_c0_g1_i2.p1	TRINITY_DN31671_c0_g1_i5.p1	TRINITY_DN62760_c0_g2_i1.p1	TRINITY_DN73614_c0_g2_i1.p1	TRINITY_DN4614_c0_g1_i1.p1	TRINITY_DN42037_c0_g1_i1.p1	TRINITY_DN10294_c1_g1_i2.p1	TRINITY_DN1199_c0_g1_i2.p1	TRINITY_DN12632_c0_g1_i4.p2	TRINITY_DN1740_c0_g1_i7.p2	TRINITY_DN72863_c0_g1_i1.p1	TRINITY_DN6700_c0_g1_i4.p1	TRINITY_DN5125_c0_g1_i1.p1	TRINITY_DN42342_c0_g1_i1.p1	TRINITY_DN4762_c0_g4_i1.p1	TRINITY_DN6377_c0_g3_i1.p1	TRINITY_DN19859_c0_g1_i1.p1	TRINITY_DN2960_c0_g1_i1.p1	TRINITY_DN701_c0_g1_i1.p1	TRINITY_DN20103_c0_g1_i2.p1	TRINITY_DN312_c0_g1_i2.p1	TRINITY_DN6360_c0_g1_i1.p1	TRINITY_DN18104_c0_g1_i1.p1	TRINITY_DN79925_c0_g1_i2.p1	TRINITY_DN12796_c1_g1_i1.p1
118527at6656	FALSE	39	97.5	FBpp0081488	TRINITY_DN3588_c0_g2_i1.p1	TRINITY_DN50333_c0_g1_i1.p1	TRINITY_DN36547_c0_g1_i1.p1	c86054_g1_i1.p1	SMAR015231-PA	TRINITY_DN18894_c0_g1_i1.p1	TRINITY_DN39255_c0_g1_i1.p1	TRINITY_DN7703_c0_g1_i1.p1	TRINITY_DN5317_c0_g1_i5.p1	TRINITY_DN3220_c0_g1_i1.p1	TRINITY_DN1661_c0_g1_i1.p1	TRINITY_DN1994_c0_g1_i2.p1		TRINITY_DN13897_c0_g1_i1.p1	TRINITY_DN21185_c0_g1_i2.p1	TRINITY_DN22162_c0_g2_i1.p1	TRINITY_DN62727_c0_g1_i1.p1	TRINITY_DN81089_c0_g1_i1.p1	TRINITY_DN34683_c0_g1_i1.p1	TRINITY_DN13131_c0_g1_i1.p1	TRINITY_DN2095_c0_g1_i1.p1	TRINITY_DN5584_c0_g1_i1.p1	TRINITY_DN3829_c0_g1_i1.p1	TRINITY_DN2192_c0_g1_i1.p1	TRINITY_DN7412_c0_g1_i1.p1	TRINITY_DN1893_c0_g1_i2.p1	TRINITY_DN3825_c0_g1_i1.p1	TRINITY_DN2088_c0_g1_i1.p1	TRINITY_DN23368_c0_g1_i1.p1	TRINITY_DN2803_c0_g1_i3.p1	TRINITY_DN1046_c0_g1_i1.p1	TRINITY_DN946_c0_g1_i1.p1	TRINITY_DN5145_c0_g3_i1.p2	TRINITY_DN2862_c0_g1_i1.p2	TRINITY_DN952_c0_g1_i2.p1	TRINITY_DN3653_c0_g2_i1.p1	TRINITY_DN25767_c1_g2_i1.p1	TRINITY_DN54406_c0_g1_i1.p1	TRINITY_DN13360_c14_g1_i1.p1
142388at6656	TRUE	40	100	FBpp0074926	TRINITY_DN3022_c0_g1_i1.p1	TRINITY_DN1548_c0_g1_i1.p1	TRINITY_DN51916_c2_g5_i1.p1	c81317_g1_i2.p1	SMAR009225-PA	TRINITY_DN22887_c0_g2_i1.p1	TRINITY_DN27092_c1_g1_i1.p1	TRINITY_DN139_c0_g1_i1.p1	TRINITY_DN467_c0_g1_i1.p4	TRINITY_DN3515_c0_g1_i1.p1	TRINITY_DN2118_c0_g1_i1.p1	TRINITY_DN1197_c0_g1_i5.p1	TRINITY_DN72_c0_g1_i1.p1	TRINITY_DN8594_c0_g1_i1.p1	TRINITY_DN9894_c0_g1_i1.p1	TRINITY_DN27718_c3_g1_i1.p2	TRINITY_DN39661_c1_g1_i1.p1	TRINITY_DN83749_c0_g1_i1.p1	TRINITY_DN33061_c0_g1_i1.p1	TRINITY_DN70648_c0_g1_i1.p1	TRINITY_DN4703_c0_g1_i1.p1	TRINITY_DN6206_c1_g1_i3.p1	TRINITY_DN487_c0_g1_i1.p1	TRINITY_DN2995_c0_g1_i1.p1	TRINITY_DN1856_c0_g1_i3.p1	TRINITY_DN7716_c0_g1_i2.p1	TRINITY_DN3486_c0_g1_i1.p2	TRINITY_DN135_c0_g1_i1.p1	TRINITY_DN223_c0_g1_i12.p3	TRINITY_DN6605_c1_g1_i1.p1	TRINITY_DN508_c0_g1_i5.p1	TRINITY_DN4994_c0_g1_i1.p1	TRINITY_DN3757_c0_g1_i2.p1	TRINITY_DN1663_c0_g1_i4.p1	TRINITY_DN452_c0_g1_i2.p1	TRINITY_DN15038_c0_g1_i1.p1	TRINITY_DN24528_c0_g2_i1.p1	TRINITY_DN78812_c0_g2_i1.p1	TRINITY_DN10973_c0_g1_i1.p1
130663at6656	FALSE	40	100	FBpp0078354	TRINITY_DN16724_c0_g1_i1.p2	TRINITY_DN35121_c0_g1_i1.p1	TRINITY_DN42063_c0_g2_i1.p1	c88838_g1_i1.p1	SMAR009408-PA	TRINITY_DN34047_c0_g1_i1.p1	TRINITY_DN43221_c1_g1_i1.p2	TRINITY_DN6612_c0_g1_i1.p1	TRINITY_DN15580_c0_g1_i1.p1	TRINITY_DN850_c0_g1_i1.p1	TRINITY_DN8962_c0_g1_i1.p1	TRINITY_DN23052_c0_g1_i1.p1	TRINITY_DN2035_c0_g2_i2.p1	TRINITY_DN26406_c0_g1_i1.p1	TRINITY_DN14812_c0_g1_i1.p1	TRINITY_DN33239_c8_g1_i4.p1	TRINITY_DN58234_c0_g1_i1.p1	TRINITY_DN79074_c0_g1_i1.p1	TRINITY_DN45801_c0_g1_i1.p1	TRINITY_DN65715_c0_g1_i1.p1	TRINITY_DN44276_c0_g1_i1.p2	TRINITY_DN192_c0_g1_i1.p1	TRINITY_DN834_c0_g1_i1.p1	TRINITY_DN2280_c0_g1_i1.p1	TRINITY_DN86251_c0_g1_i2.p1	TRINITY_DN1274_c0_g1_i1.p1	TRINITY_DN9185_c0_g1_i3.p1	TRINITY_DN6139_c0_g1_i19.p1	TRINITY_DN4447_c0_g1_i3.p1	TRINITY_DN4291_c0_g2_i4.p1	TRINITY_DN1492_c0_g1_i1.p1	TRINITY_DN56491_c0_g1_i1.p1	TRINITY_DN602_c0_g1_i1.p2	TRINITY_DN607_c0_g1_i1.p2	TRINITY_DN698_c0_g1_i1.p1	TRINITY_DN44388_c0_g1_i1.p1	TRINITY_DN28159_c0_g1_i1.p1	TRINITY_DN101670_c0_g1_i1.p1	TRINITY_DN10436_c0_g1_i1.p1
132340at6656	FALSE	40	100	FBpp0076602	TRINITY_DN4546_c0_g1_i1.p1	TRINITY_DN38304_c1_g1_i1.p1	TRINITY_DN45972_c0_g1_i1.p1	c65981_g1_i2.p1	SMAR015055-PA	TRINITY_DN39513_c0_g1_i1.p1	TRINITY_DN32695_c1_g1_i1.p2	TRINITY_DN742_c0_g1_i1.p1	TRINITY_DN18253_c0_g1_i1.p1	TRINITY_DN2023_c0_g1_i1.p1	TRINITY_DN327_c0_g1_i1.p1	TRINITY_DN28268_c0_g1_i1.p1	TRINITY_DN4700_c0_g2_i1.p1	TRINITY_DN249_c0_g2_i1.p1	TRINITY_DN49503_c0_g1_i1.p1	TRINITY_DN27215_c0_g2_i1.p2	TRINITY_DN69470_c0_g1_i1.p1	TRINITY_DN95982_c0_g1_i1.p1	TRINITY_DN42537_c0_g2_i1.p1	TRINITY_DN27173_c0_g1_i1.p1	TRINITY_DN32938_c0_g1_i1.p1	TRINITY_DN13377_c0_g1_i1.p1	TRINITY_DN597_c0_g1_i1.p1	TRINITY_DN4372_c1_g1_i1.p1	TRINITY_DN10303_c0_g2_i2.p1	TRINITY_DN25010_c0_g1_i1.p1	TRINITY_DN43157_c0_g1_i1.p1	TRINITY_DN5759_c0_g1_i1.p3	TRINITY_DN4875_c0_g1_i1.p1	TRINITY_DN1460_c0_g1_i1.p1	TRINITY_DN2143_c1_g1_i1.p1	TRINITY_DN738_c0_g1_i1.p1	TRINITY_DN11022_c0_g1_i1.p2	TRINITY_DN1052_c0_g1_i5.p1	TRINITY_DN1827_c0_g1_i1.p1	TRINITY_DN43832_c0_g1_i1.p1	TRINITY_DN23438_c0_g1_i1.p1	TRINITY_DN84074_c0_g2_i1.p1	TRINITY_DN9799_c0_g1_i1.p1
148134at6656	TRUE	40	100	FBpp0085585	TRINITY_DN16206_c0_g1_i1.p2	TRINITY_DN49815_c0_g1_i1.p1	TRINITY_DN39135_c0_g1_i1.p1	c59271_g1_i1.p1	SMAR006192-PA	TRINITY_DN41326_c0_g1_i1.p1	TRINITY_DN32200_c0_g1_i1.p1	TRINITY_DN37695_c0_g1_i1.p1	TRINITY_DN15331_c0_g1_i1.p1	TRINITY_DN1523_c0_g1_i2.p1	TRINITY_DN435_c0_g1_i2.p1	TRINITY_DN22782_c0_g1_i1.p1	TRINITY_DN8523_c0_g1_i1.p1	TRINITY_DN21996_c0_g1_i1.p1	TRINITY_DN62200_c0_g1_i1.p1	TRINITY_DN2266_c0_g1_i1.p1	TRINITY_DN91196_c0_g1_i1.p1	TRINITY_DN109978_c0_g1_i1.p1	TRINITY_DN41568_c0_g1_i1.p1	TRINITY_DN78078_c0_g1_i1.p1	TRINITY_DN8431_c0_g1_i1.p2	TRINITY_DN33843_c0_g1_i1.p1	TRINITY_DN1292_c0_g1_i1.p1	TRINITY_DN74_c0_g1_i8.p1	TRINITY_DN9904_c0_g1_i1.p1	TRINITY_DN494_c0_g1_i3.p1	TRINITY_DN3477_c1_g3_i1.p1	TRINITY_DN3436_c0_g1_i1.p1	TRINITY_DN12096_c0_g1_i2.p1	TRINITY_DN10131_c0_g1_i1.p2	TRINITY_DN27392_c0_g1_i1.p1	TRINITY_DN1835_c0_g3_i3.p2	TRINITY_DN485_c0_g1_i4.p1	TRINITY_DN1144_c2_g1_i5.p1	TRINITY_DN220_c0_g1_i1.p1	TRINITY_DN22916_c0_g1_i1.p1	TRINITY_DN39710_c0_g1_i1.p1	TRINITY_DN51255_c0_g1_i1.p2	TRINITY_DN15108_c0_g1_i1.p1
155285at6656	TRUE	40	100	FBpp0086965	TRINITY_DN70314_c0_g1_i1.p1	TRINITY_DN15280_c0_g1_i1.p1	TRINITY_DN35446_c0_g1_i1.p1	c87480_g1_i1.p2	SMAR005875-PA	TRINITY_DN25982_c0_g1_i3.p1	TRINITY_DN1206_c0_g2_i1.p1	TRINITY_DN1075_c0_g1_i2.p2	TRINITY_DN3931_c0_g1_i3.p1	TRINITY_DN11694_c0_g1_i1.p1	TRINITY_DN1353_c0_g1_i2.p1	TRINITY_DN5897_c0_g1_i1.p1	TRINITY_DN526_c0_g1_i2.p1	TRINITY_DN4319_c1_g1_i1.p2	TRINITY_DN24021_c0_g1_i1.p2	TRINITY_DN23331_c0_g1_i1.p1	TRINITY_DN66477_c0_g2_i1.p1	TRINITY_DN74762_c0_g1_i1.p1	TRINITY_DN67156_c0_g1_i1.p1	TRINITY_DN84826_c0_g1_i1.p1	TRINITY_DN2305_c0_g2_i2.p1	TRINITY_DN3664_c0_g1_i6.p1	TRINITY_DN1768_c0_g1_i1.p1	TRINITY_DN28592_c0_g1_i1.p1	TRINITY_DN87664_c0_g1_i1.p1	TRINITY_DN56437_c0_g1_i1.p1	TRINITY_DN5105_c2_g1_i1.p1	TRINITY_DN3578_c0_g1_i1.p1	TRINITY_DN520_c0_g1_i4.p2	TRINITY_DN3064_c0_g1_i1.p2	TRINITY_DN787_c0_g1_i1.p1	TRINITY_DN7473_c0_g1_i1.p1	TRINITY_DN1405_c0_g1_i1.p2	TRINITY_DN8950_c0_g1_i2.p1	TRINITY_DN873_c0_g1_i1.p2	TRINITY_DN9977_c0_g2_i1.p1	TRINITY_DN23020_c0_g2_i2.p1	TRINITY_DN138579_c0_g1_i1.p1	TRINITY_DN176_c0_g1_i1.p2
136055at6656	FALSE	40	100	FBpp0075209	TRINITY_DN14392_c0_g1_i1.p2	TRINITY_DN62793_c0_g1_i1.p1	TRINITY_DN60709_c0_g1_i1.p1	c83375_g1_i1.p1	SMAR012714-PA	TRINITY_DN62837_c0_g1_i1.p1	TRINITY_DN122083_c2_g1_i1.p1	TRINITY_DN2344_c0_g1_i1.p2	TRINITY_DN4633_c0_g1_i5.p2	TRINITY_DN31650_c0_g1_i3.p1	TRINITY_DN331_c0_g1_i1.p1	TRINITY_DN5813_c0_g1_i2.p2	TRINITY_DN37153_c0_g1_i2.p1	TRINITY_DN176_c0_g2_i1.p1	TRINITY_DN31246_c0_g2_i1.p2	TRINITY_DN3357_c1_g1_i1.p1	TRINITY_DN72881_c0_g2_i1.p1	TRINITY_DN74988_c0_g1_i1.p1	TRINITY_DN42089_c0_g1_i1.p1	TRINITY_DN78221_c0_g1_i1.p1	TRINITY_DN179_c0_g2_i1.p1	TRINITY_DN594_c0_g1_i1.p1	TRINITY_DN1679_c0_g1_i1.p1	TRINITY_DN165_c0_g1_i9.p3	TRINITY_DN6505_c0_g1_i1.p2	TRINITY_DN8401_c0_g1_i2.p1	TRINITY_DN2380_c0_g2_i1.p1	TRINITY_DN9347_c0_g1_i1.p1	TRINITY_DN4348_c0_g1_i27.p1	TRINITY_DN3691_c0_g1_i4.p2	TRINITY_DN1248_c0_g1_i1.p1	TRINITY_DN84147_c0_g1_i1.p1	TRINITY_DN510_c0_g1_i20.p2	TRINITY_DN1750_c0_g1_i1.p1	TRINITY_DN3429_c0_g1_i1.p1	TRINITY_DN21983_c0_g1_i1.p1	TRINITY_DN23663_c1_g1_i1.p1	TRINITY_DN89593_c2_g1_i1.p1	TRINITY_DN7973_c0_g1_i1.p1
137688at6656	FALSE	40	100	FBpp0081322	TRINITY_DN13192_c0_g1_i1.p1	TRINITY_DN25600_c0_g1_i1.p2	TRINITY_DN52173_c0_g1_i1.p1	c92494_g1_i1.p1	SMAR006018-PA	TRINITY_DN25530_c0_g2_i2.p1	TRINITY_DN87418_c0_g1_i1.p1	TRINITY_DN16876_c0_g1_i1.p1	TRINITY_DN118_c0_g1_i10.p2	TRINITY_DN3644_c1_g1_i2.p1	TRINITY_DN4327_c0_g1_i3.p1	TRINITY_DN15781_c0_g1_i1.p1	TRINITY_DN50941_c0_g1_i1.p1	TRINITY_DN2419_c0_g1_i3.p1	TRINITY_DN18104_c0_g2_i1.p1	TRINITY_DN11442_c0_g1_i1.p1	TRINITY_DN66989_c0_g2_i1.p1	TRINITY_DN82677_c0_g1_i2.p1	TRINITY_DN43690_c0_g1_i1.p1	TRINITY_DN45715_c1_g1_i1.p1	TRINITY_DN52246_c1_g1_i1.p1	TRINITY_DN40807_c0_g1_i2.p1	TRINITY_DN1048_c0_g1_i11.p1	TRINITY_DN1054_c0_g1_i4.p1	TRINITY_DN1521_c0_g1_i2.p1	TRINITY_DN5170_c0_g1_i1.p1	TRINITY_DN8618_c0_g1_i1.p1	TRINITY_DN5107_c0_g1_i9.p2	TRINITY_DN8331_c0_g2_i1.p1	TRINITY_DN31609_c0_g1_i1.p1	TRINITY_DN1313_c0_g1_i2.p2	TRINITY_DN6591_c0_g1_i3.p1	TRINITY_DN15379_c0_g1_i1.p2	TRINITY_DN523_c0_g2_i5.p2	TRINITY_DN20027_c0_g1_i1.p1	TRINITY_DN22667_c0_g1_i1.p1	TRINITY_DN29387_c0_g1_i3.p1	TRINITY_DN84449_c1_g1_i2.p1	TRINITY_DN2046_c0_g1_i1.p1
19208at6656	TRUE	40	100	FBpp0074835	TRINITY_DN13129_c0_g1_i1.p1	TRINITY_DN27352_c0_g1_i1.p1	TRINITY_DN50318_c0_g1_i1.p1	c68437_g1_i1.p1	SMAR015292-PA	TRINITY_DN27916_c0_g2_i1.p1	TRINITY_DN41777_c0_g1_i1.p1	TRINITY_DN618_c0_g1_i1.p1	TRINITY_DN2330_c0_g1_i1.p1	TRINITY_DN16080_c0_g1_i1.p1	TRINITY_DN3374_c0_g2_i4.p1	TRINITY_DN9972_c0_g1_i1.p1	TRINITY_DN1547_c0_g1_i1.p1	TRINITY_DN26260_c0_g1_i1.p1	TRINITY_DN28135_c0_g1_i1.p1	TRINITY_DN24148_c0_g2_i1.p1	TRINITY_DN64726_c0_g1_i1.p1	TRINITY_DN71988_c0_g1_i1.p1	TRINITY_DN55854_c0_g1_i1.p1	TRINITY_DN72290_c0_g1_i1.p1	TRINITY_DN6852_c0_g1_i3.p1	TRINITY_DN5149_c0_g1_i2.p1	TRINITY_DN2993_c0_g1_i3.p1	TRINITY_DN6956_c0_g1_i3.p1	TRINITY_DN56620_c0_g1_i1.p1	TRINITY_DN57567_c0_g1_i1.p1	TRINITY_DN1207_c0_g1_i5.p1	TRINITY_DN5169_c0_g1_i1.p1	TRINITY_DN1772_c0_g1_i1.p1	TRINITY_DN1951_c0_g1_i1.p2	TRINITY_DN32216_c0_g1_i1.p1	TRINITY_DN4563_c0_g1_i3.p1	TRINITY_DN20_c0_g1_i3.p1	TRINITY_DN4715_c0_g1_i18.p1	TRINITY_DN23672_c0_g1_i1.p1	TRINITY_DN15766_c0_g1_i1.p1	TRINITY_DN31003_c1_g1_i1.p1	TRINITY_DN84056_c0_g1_i1.p1	TRINITY_DN9903_c0_g1_i1.p1
67113at6656	TRUE	40	100	FBpp0078278	TRINITY_DN6641_c0_g1_i1.p1	TRINITY_DN28963_c0_g1_i1.p1	TRINITY_DN50053_c1_g1_i1.p1	c91102_g1_i1.p1	SMAR007398-PA	TRINITY_DN3842_c0_g1_i1.p1	TRINITY_DN36018_c0_g2_i1.p1	TRINITY_DN4445_c0_g1_i1.p1	TRINITY_DN280_c0_g1_i231.p1	TRINITY_DN1306_c0_g1_i1.p1	TRINITY_DN5592_c0_g1_i2.p1	TRINITY_DN2286_c0_g1_i2.p1	TRINITY_DN5233_c0_g1_i2.p1	TRINITY_DN17569_c0_g1_i1.p1	TRINITY_DN27017_c0_g1_i2.p1	TRINITY_DN22828_c1_g1_i1.p1	TRINITY_DN70496_c0_g2_i1.p1	TRINITY_DN84051_c0_g1_i1.p1	TRINITY_DN2176_c0_g1_i1.p1	TRINITY_DN70230_c0_g1_i1.p1	TRINITY_DN1520_c0_g1_i3.p1	TRINITY_DN26214_c0_g1_i1.p1	TRINITY_DN2633_c0_g1_i1.p1	TRINITY_DN1620_c0_g1_i2.p1	TRINITY_DN48194_c0_g1_i2.p1	TRINITY_DN19944_c0_g1_i3.p1	TRINITY_DN1809_c0_g1_i6.p1	TRINITY_DN3130_c0_g1_i6.p1	TRINITY_DN7285_c0_g1_i1.p2	TRINITY_DN1421_c0_g1_i7.p2	TRINITY_DN3123_c0_g1_i3.p2	TRINITY_DN8581_c0_g1_i1.p1	TRINITY_DN26259_c0_g1_i1.p1	TRINITY_DN1237_c0_g1_i5.p2	TRINITY_DN14790_c0_g1_i2.p1	TRINITY_DN16159_c0_g1_i1.p1	TRINITY_DN24684_c0_g1_i1.p1	TRINITY_DN24225_c0_g1_i1.p1	TRINITY_DN799_c0_g1_i1.p1
147002at6656	FALSE	39	97.5	FBpp0078598	TRINITY_DN11347_c0_g2_i1.p1	TRINITY_DN5515_c0_g1_i1.p1	TRINITY_DN51748_c0_g1_i1.p1	c166892_g1_i1.p1	SMAR000799-PA	TRINITY_DN21514_c0_g1_i2.p1	TRINITY_DN40307_c0_g1_i1.p1	TRINITY_DN2378_c0_g3_i2.p1	TRINITY_DN1677_c0_g1_i2.p1	TRINITY_DN2024_c0_g1_i2.p1	TRINITY_DN18172_c0_g1_i1.p1	TRINITY_DN739_c0_g1_i1.p1	TRINITY_DN51540_c0_g1_i1.p1	TRINITY_DN19587_c0_g1_i1.p1	TRINITY_DN32155_c1_g1_i1.p1	TRINITY_DN18198_c0_g1_i2.p1	TRINITY_DN71813_c0_g2_i1.p1	TRINITY_DN79810_c0_g2_i1.p1		TRINITY_DN48877_c0_g1_i1.p1	TRINITY_DN54209_c0_g1_i1.p1	TRINITY_DN7247_c0_g1_i3.p1	TRINITY_DN861_c0_g1_i1.p1	TRINITY_DN3098_c0_g1_i1.p1	TRINITY_DN31046_c0_g1_i1.p1	TRINITY_DN4775_c0_g1_i5.p1	TRINITY_DN1508_c0_g1_i8.p1	TRINITY_DN190_c0_g1_i15.p1	TRINITY_DN1100_c0_g3_i6.p1	TRINITY_DN27689_c0_g1_i1.p1	TRINITY_DN1425_c0_g1_i2.p1	TRINITY_DN5640_c0_g3_i1.p1	TRINITY_DN5830_c5_g1_i1.p1	TRINITY_DN2485_c0_g1_i2.p1	TRINITY_DN605_c0_g2_i1.p1	TRINITY_DN17883_c0_g1_i1.p1	TRINITY_DN27473_c0_g1_i2.p1	TRINITY_DN89912_c0_g1_i1.p1	TRINITY_DN15552_c0_g1_i1.p1
69394at6656	TRUE	40	100	FBpp0072166	TRINITY_DN16260_c0_g3_i1.p1	TRINITY_DN23848_c0_g1_i1.p1	TRINITY_DN53154_c2_g1_i1.p1	c95137_g3_i3.p1	SMAR008633-PA	TRINITY_DN20157_c0_g2_i1.p1	TRINITY_DN35122_c0_g2_i2.p1	TRINITY_DN5981_c0_g1_i1.p1	TRINITY_DN562_c0_g1_i2.p1	TRINITY_DN3956_c0_g1_i4.p1	TRINITY_DN1827_c0_g1_i1.p1	TRINITY_DN1040_c0_g1_i1.p1	TRINITY_DN60_c0_g1_i1.p1	TRINITY_DN1759_c0_g1_i1.p1	TRINITY_DN41513_c0_g1_i1.p1	TRINITY_DN23861_c0_g1_i1.p1	TRINITY_DN66576_c0_g1_i1.p1	TRINITY_DN83980_c0_g1_i1.p1	TRINITY_DN15295_c0_g1_i1.p1	TRINITY_DN20888_c0_g1_i1.p1	TRINITY_DN2487_c2_g2_i1.p1	TRINITY_DN512_c0_g1_i2.p1	TRINITY_DN1818_c0_g1_i1.p1	TRINITY_DN649_c0_g1_i1.p1	TRINITY_DN1175_c0_g1_i2.p1	TRINITY_DN1454_c0_g1_i6.p1	TRINITY_DN1562_c0_g1_i2.p1	TRINITY_DN2974_c1_g1_i2.p1	TRINITY_DN1274_c1_g1_i21.p2	TRINITY_DN1325_c0_g1_i1.p1	TRINITY_DN3295_c0_g1_i1.p1	TRINITY_DN4066_c0_g1_i8.p1	TRINITY_DN5180_c0_g1_i16.p1	TRINITY_DN10971_c0_g1_i1.p1	TRINITY_DN773_c0_g1_i2.p1	TRINITY_DN7717_c0_g1_i1.p1	TRINITY_DN30788_c1_g1_i4.p1	TRINITY_DN74680_c0_g1_i1.p1	TRINITY_DN10995_c0_g1_i1.p1
73084at6656	TRUE	40	100	FBpp0075104	TRINITY_DN65491_c0_g1_i1.p1	TRINITY_DN43522_c0_g1_i1.p1	TRINITY_DN45183_c0_g1_i1.p1	c78703_g1_i1.p1	SMAR013786-PA	TRINITY_DN22548_c0_g2_i1.p1	TRINITY_DN41589_c0_g1_i1.p1	TRINITY_DN38243_c0_g1_i1.p1	TRINITY_DN4956_c0_g1_i2.p1	TRINITY_DN3454_c0_g1_i1.p1	TRINITY_DN2647_c0_g1_i1.p1	TRINITY_DN568_c0_g1_i1.p1	TRINITY_DN53329_c0_g1_i2.p1	TRINITY_DN17374_c0_g1_i1.p1	TRINITY_DN3644_c0_g1_i1.p1	TRINITY_DN28435_c0_g1_i1.p1	TRINITY_DN66141_c0_g1_i1.p1	TRINITY_DN85497_c8_g9_i1.p1	TRINITY_DN52215_c0_g1_i1.p1	TRINITY_DN78419_c0_g1_i1.p1	TRINITY_DN17129_c0_g1_i1.p1	TRINITY_DN12809_c0_g1_i1.p1	TRINITY_DN2383_c0_g1_i1.p1	TRINITY_DN1353_c0_g1_i1.p1	TRINITY_DN21230_c0_g1_i3.p1	TRINITY_DN1521_c0_g1_i1.p1	TRINITY_DN1623_c0_g1_i3.p1	TRINITY_DN3591_c0_g1_i14.p1	TRINITY_DN33_c0_g2_i1.p1	TRINITY_DN4303_c0_g1_i1.p1	TRINITY_DN23190_c0_g1_i1.p1	TRINITY_DN981_c0_g1_i5.p1	TRINITY_DN26705_c0_g1_i1.p1	TRINITY_DN1398_c0_g1_i3.p1	TRINITY_DN4455_c0_g1_i5.p1	TRINITY_DN8766_c0_g1_i1.p1	TRINITY_DN29214_c0_g1_i1.p1	TRINITY_DN81434_c0_g1_i1.p1	TRINITY_DN9035_c0_g1_i1.p1
73301at6656	TRUE	40	100	FBpp0075754	TRINITY_DN54206_c0_g1_i2.p1	TRINITY_DN61872_c0_g1_i1.p1	TRINITY_DN50355_c0_g1_i2.p2	c88480_g1_i2.p2	SMAR006441-PA	TRINITY_DN27856_c2_g1_i6.p1	TRINITY_DN42039_c0_g1_i1.p1	TRINITY_DN45106_c0_g1_i1.p1	TRINITY_DN6618_c0_g1_i3.p1	TRINITY_DN25328_c0_g1_i1.p1	TRINITY_DN105_c1_g1_i12.p2	TRINITY_DN494_c1_g1_i7.p1	TRINITY_DN13815_c0_g1_i1.p1	TRINITY_DN1645_c0_g1_i10.p2	TRINITY_DN31090_c0_g2_i2.p1	TRINITY_DN33722_c1_g1_i1.p1	TRINITY_DN73388_c4_g3_i1.p1	TRINITY_DN53945_c0_g1_i1.p1	TRINITY_DN43453_c0_g2_i1.p1	TRINITY_DN52078_c0_g1_i2.p1	TRINITY_DN1816_c0_g1_i1.p1	TRINITY_DN551_c0_g1_i4.p1	TRINITY_DN3356_c0_g1_i1.p1	TRINITY_DN68_c0_g1_i17.p2	TRINITY_DN49998_c0_g1_i1.p1	TRINITY_DN40995_c0_g1_i1.p1	TRINITY_DN4607_c0_g2_i1.p1	TRINITY_DN2100_c0_g1_i15.p1	TRINITY_DN2695_c0_g1_i1.p1	TRINITY_DN2614_c0_g1_i2.p1	TRINITY_DN493_c0_g1_i2.p2	TRINITY_DN426_c0_g1_i3.p1	TRINITY_DN15505_c0_g1_i1.p1	TRINITY_DN2376_c0_g1_i11.p1	TRINITY_DN17850_c0_g1_i1.p1	TRINITY_DN31652_c0_g1_i1.p1	TRINITY_DN19179_c0_g1_i1.p1	TRINITY_DN88815_c0_g1_i1.p1	TRINITY_DN13367_c9_g1_i1.p1
83372at6656	TRUE	40	100	FBpp0088527	TRINITY_DN14838_c0_g1_i2.p1	TRINITY_DN9577_c0_g1_i1.p1	TRINITY_DN51617_c0_g1_i1.p1	c77197_g1_i1.p1	SMAR004228-PA	TRINITY_DN17975_c0_g1_i1.p1	TRINITY_DN31433_c0_g1_i1.p1	TRINITY_DN1299_c0_g1_i1.p1	TRINITY_DN311_c0_g2_i1.p1	TRINITY_DN21496_c0_g1_i1.p1	TRINITY_DN2811_c0_g1_i1.p1	TRINITY_DN40963_c0_g1_i1.p1	TRINITY_DN9123_c0_g1_i1.p1	TRINITY_DN21686_c1_g1_i1.p1	TRINITY_DN28436_c0_g2_i1.p1	TRINITY_DN26816_c0_g1_i1.p1	TRINITY_DN43248_c0_g1_i1.p1	TRINITY_DN8978_c0_g1_i1.p1	TRINITY_DN12974_c0_g2_i1.p1	TRINITY_DN61365_c1_g1_i1.p1	TRINITY_DN363_c0_g1_i2.p1	TRINITY_DN3413_c0_g1_i1.p1	TRINITY_DN1010_c0_g1_i6.p1	TRINITY_DN273_c0_g1_i14.p1	TRINITY_DN2143_c0_g1_i1.p1	TRINITY_DN58_c0_g1_i4.p1	TRINITY_DN30360_c0_g1_i1.p1	TRINITY_DN663_c0_g1_i9.p1	TRINITY_DN1927_c0_g1_i5.p1	TRINITY_DN19074_c0_g1_i1.p2	TRINITY_DN479_c0_g1_i1.p2	TRINITY_DN3960_c0_g1_i4.p1	TRINITY_DN2523_c0_g1_i1.p1	TRINITY_DN2255_c0_g1_i1.p1	TRINITY_DN462_c0_g1_i1.p1	TRINITY_DN43665_c0_g1_i1.p1	TRINITY_DN30377_c0_g1_i1.p1	TRINITY_DN90109_c1_g3_i2.p1	TRINITY_DN12811_c0_g1_i2.p1
84097at6656	TRUE	40	100	FBpp0083570	TRINITY_DN41485_c0_g1_i1.p1	TRINITY_DN23327_c0_g1_i1.p2	TRINITY_DN45734_c1_g1_i1.p1	c78283_g1_i1.p1	SMAR011899-PA	TRINITY_DN22751_c0_g1_i2.p1	TRINITY_DN42069_c1_g1_i1.p1	TRINITY_DN433_c0_g1_i2.p1	TRINITY_DN5017_c0_g1_i1.p1	TRINITY_DN569_c0_g1_i3.p1	TRINITY_DN33535_c0_g1_i1.p1	TRINITY_DN15611_c0_g1_i1.p1	TRINITY_DN2455_c0_g1_i1.p1	TRINITY_DN1978_c0_g1_i1.p1	TRINITY_DN30840_c2_g1_i3.p1	TRINITY_DN28368_c0_g1_i1.p1	TRINITY_DN69206_c0_g1_i1.p1	TRINITY_DN57942_c0_g1_i1.p1	TRINITY_DN95445_c0_g1_i1.p1	TRINITY_DN12851_c0_g2_i1.p1	TRINITY_DN32945_c0_g1_i1.p1	TRINITY_DN1655_c0_g2_i3.p1	TRINITY_DN1287_c0_g1_i1.p1	TRINITY_DN40031_c0_g2_i1.p1	TRINITY_DN25224_c0_g2_i1.p1	TRINITY_DN1145_c0_g1_i1.p1	TRINITY_DN8277_c0_g1_i1.p1	TRINITY_DN9370_c0_g1_i1.p1	TRINITY_DN887_c0_g1_i3.p1	TRINITY_DN12819_c0_g1_i1.p1	TRINITY_DN81_c0_g2_i1.p1	TRINITY_DN5484_c0_g1_i5.p1	TRINITY_DN152_c0_g1_i41.p1	TRINITY_DN1520_c0_g1_i1.p1	TRINITY_DN9955_c0_g1_i1.p1	TRINITY_DN27851_c0_g1_i1.p1	TRINITY_DN45588_c0_g1_i1.p1	TRINITY_DN91358_c3_g3_i4.p1	TRINITY_DN2457_c0_g1_i1.p1
25554at6656	FALSE	39	97.5	FBpp0075148	TRINITY_DN17547_c0_g1_i1.p1	TRINITY_DN24695_c0_g2_i1.p1	TRINITY_DN50166_c0_g1_i1.p1	c89103_g1_i1.p1	SMAR012696-PA	TRINITY_DN22290_c167_g6_i1.p1	TRINITY_DN15700_c2_g1_i1.p1	TRINITY_DN1599_c0_g2_i3.p1	TRINITY_DN1010_c1_g1_i2.p1	TRINITY_DN997_c0_g1_i3.p1	TRINITY_DN1120_c0_g1_i1.p1	TRINITY_DN2457_c0_g1_i1.p1		TRINITY_DN12708_c0_g1_i1.p1	TRINITY_DN29478_c0_g1_i1.p1	TRINITY_DN27852_c0_g2_i2.p1	TRINITY_DN71585_c0_g1_i1.p1	TRINITY_DN84493_c2_g1_i1.p1	TRINITY_DN46207_c0_g3_i1.p1	TRINITY_DN60093_c0_g1_i1.p1	TRINITY_DN5805_c0_g2_i1.p1	TRINITY_DN17378_c0_g1_i1.p1	TRINITY_DN13626_c0_g1_i1.p1	TRINITY_DN40088_c0_g1_i1.p1	TRINITY_DN4714_c0_g1_i1.p1	TRINITY_DN30792_c0_g2_i1.p1	TRINITY_DN6202_c0_g1_i1.p1	TRINITY_DN9103_c0_g1_i7.p1	TRINITY_DN2637_c0_g1_i2.p1	TRINITY_DN4210_c0_g1_i1.p1	TRINITY_DN27319_c0_g1_i1.p1	TRINITY_DN150_c0_g1_i1.p1	TRINITY_DN6271_c0_g1_i2.p1	TRINITY_DN478_c0_g1_i2.p1	TRINITY_DN9355_c0_g1_i1.p1	TRINITY_DN25778_c1_g1_i1.p1	TRINITY_DN30917_c1_g1_i1.p1	TRINITY_DN92439_c3_g1_i1.p1	TRINITY_DN11078_c0_g1_i1.p1
3585at6656	FALSE	39	97.5	FBpp0072539	TRINITY_DN17348_c0_g1_i1.p1	TRINITY_DN31208_c4_g1_i1.p1	TRINITY_DN52157_c1_g4_i1.p1	c99097_g2_i1.p1	SMAR005845-PA	TRINITY_DN28990_c0_g2_i5.p1	TRINITY_DN42378_c0_g1_i2.p1	TRINITY_DN616_c0_g2_i8.p1	TRINITY_DN2472_c0_g1_i6.p1	TRINITY_DN10541_c0_g1_i1.p1	TRINITY_DN2119_c0_g1_i7.p1	TRINITY_DN41026_c0_g1_i1.p1	TRINITY_DN13038_c0_g1_i1.p1	TRINITY_DN17231_c0_g1_i1.p1	TRINITY_DN27204_c0_g1_i1.p1	TRINITY_DN33350_c0_g2_i1.p1	TRINITY_DN69398_c0_g1_i2.p1	TRINITY_DN73283_c0_g2_i1.p1	TRINITY_DN29163_c1_g1_i1.p1		TRINITY_DN8086_c2_g2_i1.p1	TRINITY_DN16381_c0_g1_i1.p1	TRINITY_DN1792_c0_g2_i2.p1	TRINITY_DN150_c0_g1_i27.p1	TRINITY_DN904_c0_g1_i1.p1	TRINITY_DN1550_c0_g1_i4.p1	TRINITY_DN1248_c0_g1_i3.p1	TRINITY_DN542_c0_g1_i9.p1	TRINITY_DN1500_c0_g1_i20.p1	TRINITY_DN832_c0_g1_i5.p1	TRINITY_DN651_c0_g1_i1.p1	TRINITY_DN23342_c0_g1_i9.p1	TRINITY_DN3103_c0_g1_i42.p1	TRINITY_DN943_c0_g1_i1.p1	TRINITY_DN22083_c0_g1_i2.p1	TRINITY_DN22265_c0_g1_i1.p1	TRINITY_DN31994_c0_g3_i4.p1	TRINITY_DN92440_c0_g1_i1.p1	TRINITY_DN13105_c0_g2_i1.p1
40092at6656	FALSE	40	100	FBpp0087219	TRINITY_DN13772_c0_g3_i1.p1	TRINITY_DN25543_c0_g2_i1.p1	TRINITY_DN49485_c0_g2_i1.p1	c93269_g1_i1.p1	SMAR013096-PA	TRINITY_DN23863_c0_g1_i1.p1	TRINITY_DN21091_c0_g1_i1.p1	TRINITY_DN675_c0_g2_i2.p1	TRINITY_DN17_c0_g1_i4.p1	TRINITY_DN26214_c0_g1_i1.p1	TRINITY_DN14417_c0_g1_i1.p1	TRINITY_DN16304_c0_g1_i1.p1	TRINITY_DN48809_c0_g1_i1.p1	TRINITY_DN5663_c0_g1_i1.p1	TRINITY_DN21478_c0_g1_i1.p1	TRINITY_DN33880_c2_g1_i1.p1	TRINITY_DN72104_c0_g2_i1.p1	TRINITY_DN80434_c2_g1_i1.p1	TRINITY_DN44712_c0_g1_i1.p1	TRINITY_DN95_c1_g1_i1.p1	TRINITY_DN1818_c0_g2_i2.p1	TRINITY_DN16886_c0_g1_i2.p1	TRINITY_DN6425_c0_g1_i2.p1	TRINITY_DN7056_c0_g1_i2.p1	TRINITY_DN51961_c0_g1_i1.p1	TRINITY_DN42261_c0_g1_i1.p1	TRINITY_DN10180_c0_g1_i9.p1	TRINITY_DN1651_c0_g1_i7.p1	TRINITY_DN1516_c0_g1_i6.p1	TRINITY_DN247_c0_g1_i1.p1	TRINITY_DN459_c0_g1_i2.p1	TRINITY_DN5931_c0_g1_i1.p1	TRINITY_DN1497_c0_g1_i3.p1	TRINITY_DN5077_c0_g1_i1.p1	TRINITY_DN1017_c0_g1_i3.p1	TRINITY_DN14486_c0_g1_i1.p1	TRINITY_DN14227_c0_g1_i1.p1	TRINITY_DN13546_c0_g1_i1.p1	TRINITY_DN11985_c0_g1_i1.p1
44630at6656	FALSE	39	97.5	FBpp0085201	TRINITY_DN12103_c0_g2_i1.p1	TRINITY_DN50381_c0_g1_i1.p1	TRINITY_DN35820_c0_g1_i1.p1	c83921_g1_i1.p1	SMAR003099-PA	TRINITY_DN22651_c1_g3_i1.p1	TRINITY_DN41492_c0_g1_i1.p1	TRINITY_DN1201_c0_g3_i1.p1	TRINITY_DN531_c0_g3_i2.p2	TRINITY_DN10696_c0_g1_i4.p1	TRINITY_DN4127_c3_g1_i1.p1	TRINITY_DN585_c0_g1_i1.p1	TRINITY_DN29804_c0_g1_i1.p1	TRINITY_DN624_c0_g2_i1.p1	TRINITY_DN24149_c0_g1_i2.p1	TRINITY_DN7220_c0_g1_i1.p1	TRINITY_DN54110_c0_g1_i1.p1	TRINITY_DN86263_c0_g1_i1.p1		TRINITY_DN31363_c0_g1_i1.p1	TRINITY_DN2862_c0_g1_i1.p1	TRINITY_DN50474_c0_g1_i1.p1	TRINITY_DN1248_c0_g1_i2.p1	TRINITY_DN8018_c0_g1_i2.p1	TRINITY_DN75726_c0_g1_i1.p1	TRINITY_DN1907_c0_g1_i3.p1	TRINITY_DN1003_c0_g1_i3.p1	TRINITY_DN5685_c0_g1_i2.p1	TRINITY_DN1048_c0_g1_i4.p1	TRINITY_DN2569_c2_g1_i1.p1	TRINITY_DN1849_c0_g1_i2.p1	TRINITY_DN1572_c0_g1_i1.p1	TRINITY_DN1318_c0_g1_i18.p1	TRINITY_DN1887_c0_g1_i3.p1	TRINITY_DN2011_c0_g1_i23.p2	TRINITY_DN25370_c0_g1_i4.p1	TRINITY_DN24290_c0_g2_i2.p1	TRINITY_DN88183_c14_g1_i1.p1	TRINITY_DN10168_c0_g1_i1.p1
45556at6656	FALSE	40	100	FBpp0084044	TRINITY_DN40528_c0_g1_i1.p1	TRINITY_DN28126_c2_g1_i1.p1	TRINITY_DN51646_c0_g1_i2.p1	c100235_g4_i1.p1	SMAR004303-PA	TRINITY_DN25060_c0_g3_i1.p1	TRINITY_DN51606_c0_g1_i1.p1	TRINITY_DN17481_c0_g1_i1.p1	TRINITY_DN11998_c0_g1_i1.p1	TRINITY_DN4420_c0_g1_i4.p1	TRINITY_DN4821_c0_g1_i2.p1	TRINITY_DN15688_c0_g1_i1.p1	TRINITY_DN56171_c0_g1_i1.p1	TRINITY_DN10208_c0_g1_i3.p1	TRINITY_DN26328_c0_g1_i1.p1	TRINITY_DN32519_c4_g1_i6.p1	TRINITY_DN65074_c0_g1_i1.p1	TRINITY_DN87609_c0_g1_i1.p2	TRINITY_DN38185_c0_g4_i1.p1	TRINITY_DN41373_c0_g1_i2.p1	TRINITY_DN35290_c0_g1_i1.p1	TRINITY_DN5553_c0_g1_i2.p1	TRINITY_DN4057_c0_g1_i1.p1	TRINITY_DN8233_c0_g1_i1.p1	TRINITY_DN10778_c0_g1_i1.p1	TRINITY_DN2193_c0_g1_i3.p1	TRINITY_DN5764_c0_g2_i1.p1	TRINITY_DN7828_c0_g1_i3.p1	TRINITY_DN1693_c1_g1_i33.p2	TRINITY_DN14594_c0_g1_i1.p1	TRINITY_DN7321_c0_g1_i2.p1	TRINITY_DN3693_c0_g1_i3.p1	TRINITY_DN4373_c0_g1_i1.p3	TRINITY_DN5872_c0_g1_i4.p1	TRINITY_DN27457_c0_g1_i1.p1	TRINITY_DN21980_c0_g1_i2.p1	TRINITY_DN15520_c0_g3_i1.p1	TRINITY_DN84946_c0_g2_i1.p1	TRINITY_DN13384_c15_g1_i1.p1
84169at6656	TRUE	40	100	FBpp0078664	TRINITY_DN76264_c0_g1_i1.p1	TRINITY_DN3716_c0_g1_i1.p1	TRINITY_DN44415_c0_g1_i1.p1	c167438_g1_i1.p1	SMAR003005-PA	TRINITY_DN21280_c0_g1_i1.p1	TRINITY_DN37955_c0_g1_i1.p1	TRINITY_DN7806_c0_g1_i1.p1	TRINITY_DN6561_c0_g1_i2.p1	TRINITY_DN1420_c0_g1_i1.p1	TRINITY_DN3172_c0_g1_i1.p1	TRINITY_DN41720_c0_g1_i1.p1	TRINITY_DN46546_c0_g1_i1.p1	TRINITY_DN742_c0_g1_i3.p2	TRINITY_DN20604_c0_g1_i1.p1	TRINITY_DN29273_c2_g1_i3.p1	TRINITY_DN56834_c0_g3_i1.p1	TRINITY_DN151895_c0_g1_i1.p1	TRINITY_DN51034_c0_g1_i1.p1	TRINITY_DN47315_c2_g1_i1.p1	TRINITY_DN16921_c0_g5_i1.p1	TRINITY_DN49432_c0_g1_i1.p1	TRINITY_DN2051_c0_g1_i1.p1	TRINITY_DN4188_c0_g1_i1.p1	TRINITY_DN4877_c0_g1_i2.p1	TRINITY_DN41251_c0_g1_i1.p1	TRINITY_DN1715_c0_g2_i1.p1	TRINITY_DN6669_c0_g1_i2.p1	TRINITY_DN860_c0_g1_i31.p2	TRINITY_DN1775_c0_g1_i1.p1	TRINITY_DN9923_c0_g1_i2.p1	TRINITY_DN2151_c0_g1_i6.p1	TRINITY_DN3959_c0_g1_i1.p2	TRINITY_DN5020_c0_g1_i1.p1	TRINITY_DN3705_c0_g1_i1.p1	TRINITY_DN25661_c2_g2_i1.p1	TRINITY_DN23277_c0_g1_i1.p1	TRINITY_DN79144_c1_g3_i1.p1	TRINITY_DN13280_c8_g1_i1.p1
86889at6656	TRUE	40	100	FBpp0081618	TRINITY_DN12031_c0_g3_i1.p1	TRINITY_DN25972_c0_g2_i1.p1	TRINITY_DN49682_c0_g1_i1.p1	c87041_g1_i1.p1	SMAR011676-PA	TRINITY_DN19913_c0_g1_i3.p1	TRINITY_DN39632_c0_g2_i2.p1	TRINITY_DN992_c0_g1_i1.p1	TRINITY_DN2373_c0_g1_i1.p1	TRINITY_DN7516_c0_g1_i1.p1	TRINITY_DN3759_c0_g1_i2.p1	TRINITY_DN5956_c0_g3_i2.p1	TRINITY_DN44803_c0_g1_i1.p1	TRINITY_DN1421_c0_g1_i12.p1	TRINITY_DN18787_c0_g2_i1.p1	TRINITY_DN26731_c14_g1_i1.p1	TRINITY_DN72780_c0_g1_i1.p1	TRINITY_DN83422_c1_g1_i1.p1	TRINITY_DN30573_c0_g1_i1.p1	TRINITY_DN71491_c0_g1_i1.p1	TRINITY_DN46874_c0_g1_i1.p1	TRINITY_DN26805_c0_g1_i1.p1	TRINITY_DN24790_c0_g1_i1.p1	TRINITY_DN2546_c0_g1_i1.p1	TRINITY_DN13890_c0_g1_i1.p1	TRINITY_DN581_c0_g2_i1.p1	TRINITY_DN1653_c0_g1_i1.p1	TRINITY_DN4245_c0_g1_i5.p1	TRINITY_DN10125_c0_g1_i26.p1	TRINITY_DN8595_c0_g1_i3.p1	TRINITY_DN1296_c0_g1_i1.p1	TRINITY_DN3297_c0_g1_i2.p1	TRINITY_DN7266_c0_g1_i2.p1	TRINITY_DN5834_c0_g1_i1.p1	TRINITY_DN1231_c0_g1_i2.p1	TRINITY_DN24668_c0_g1_i1.p1	TRINITY_DN3683_c0_g1_i1.p1	TRINITY_DN90910_c2_g2_i2.p1	TRINITY_DN10267_c0_g1_i1.p1
87014at6656	TRUE	40	100	FBpp0075117	TRINITY_DN9581_c0_g1_i2.p1	TRINITY_DN10087_c0_g1_i1.p1	TRINITY_DN107714_c0_g1_i1.p1	c86259_g1_i1.p1	SMAR005161-PA	TRINITY_DN25365_c0_g1_i1.p1	TRINITY_DN14567_c0_g2_i1.p1	TRINITY_DN4595_c0_g1_i2.p1	TRINITY_DN847_c0_g1_i1.p1	TRINITY_DN25239_c0_g1_i2.p1	TRINITY_DN4683_c0_g1_i1.p1	TRINITY_DN594_c0_g1_i2.p1	TRINITY_DN7972_c0_g1_i2.p1	TRINITY_DN11889_c0_g1_i1.p1	TRINITY_DN22158_c0_g1_i1.p1	TRINITY_DN25533_c1_g1_i1.p1	TRINITY_DN68272_c0_g1_i1.p1	TRINITY_DN87553_c0_g1_i7.p2	TRINITY_DN15572_c0_g1_i1.p1	TRINITY_DN60500_c1_g1_i1.p1	TRINITY_DN13211_c0_g2_i1.p1	TRINITY_DN2569_c0_g1_i3.p1	TRINITY_DN4945_c0_g5_i1.p1	TRINITY_DN1204_c0_g1_i4.p1	TRINITY_DN19594_c0_g1_i1.p1	TRINITY_DN57028_c0_g1_i1.p1	TRINITY_DN396_c0_g1_i12.p1	TRINITY_DN3762_c0_g1_i12.p1	TRINITY_DN712_c0_g1_i15.p3	TRINITY_DN1316_c0_g1_i4.p1	TRINITY_DN2323_c0_g1_i1.p1	TRINITY_DN3296_c0_g1_i7.p1	TRINITY_DN1177_c0_g1_i4.p1	TRINITY_DN377_c0_g1_i3.p1	TRINITY_DN2605_c0_g1_i2.p1	TRINITY_DN22510_c0_g1_i2.p1	TRINITY_DN29852_c0_g3_i1.p1	TRINITY_DN68055_c0_g1_i1.p1	TRINITY_DN9093_c0_g2_i1.p1
125234at6656	TRUE	40	100	FBpp0086599	TRINITY_DN69606_c0_g1_i1.p1	TRINITY_DN61653_c0_g1_i1.p1	TRINITY_DN52672_c0_g3_i2.p2	c78197_g1_i2.p1	SMAR015326-PA	TRINITY_DN21842_c0_g2_i2.p1	TRINITY_DN88251_c0_g1_i1.p1	TRINITY_DN41225_c0_g1_i1.p1	TRINITY_DN2344_c0_g1_i4.p1	TRINITY_DN16200_c0_g1_i1.p1	TRINITY_DN4599_c0_g1_i2.p1	TRINITY_DN3941_c0_g1_i1.p1	TRINITY_DN3093_c0_g1_i3.p1	TRINITY_DN3405_c0_g1_i1.p1	TRINITY_DN24354_c0_g1_i1.p2	TRINITY_DN17740_c0_g1_i1.p1	TRINITY_DN68130_c0_g2_i1.p1	TRINITY_DN53293_c0_g2_i1.p1	TRINITY_DN26098_c0_g1_i1.p1	TRINITY_DN43562_c0_g2_i1.p1	TRINITY_DN1985_c2_g1_i5.p1	TRINITY_DN25287_c0_g1_i1.p1	TRINITY_DN3732_c0_g1_i11.p1	TRINITY_DN466_c0_g1_i1.p1	TRINITY_DN30667_c0_g1_i1.p1	TRINITY_DN61190_c0_g1_i2.p1	TRINITY_DN43205_c0_g1_i1.p1	TRINITY_DN2502_c0_g1_i1.p1	TRINITY_DN29248_c0_g1_i1.p1	TRINITY_DN28675_c0_g1_i1.p1	TRINITY_DN4166_c0_g1_i2.p1	TRINITY_DN2429_c0_g1_i3.p1	TRINITY_DN3546_c1_g1_i12.p1	TRINITY_DN5347_c0_g1_i2.p1	TRINITY_DN2355_c0_g1_i1.p1	TRINITY_DN23566_c0_g2_i1.p2	TRINITY_DN24850_c0_g2_i1.p1	TRINITY_DN75120_c3_g1_i1.p1	TRINITY_DN12319_c1_g2_i1.p1
132441at6656	TRUE	40	100	FBpp0100150	TRINITY_DN16964_c0_g1_i2.p1	TRINITY_DN49780_c0_g1_i1.p1	TRINITY_DN49865_c0_g1_i1.p1	c96381_g1_i1.p1	SMAR003050-PA	TRINITY_DN26724_c0_g3_i1.p1	TRINITY_DN42844_c0_g1_i1.p1	TRINITY_DN12772_c0_g1_i1.p1	TRINITY_DN11583_c0_g1_i1.p1	TRINITY_DN4026_c0_g2_i1.p1	TRINITY_DN33393_c0_g1_i1.p1	TRINITY_DN3738_c0_g1_i1.p1	TRINITY_DN971_c0_g1_i1.p3	TRINITY_DN32138_c0_g1_i1.p1	TRINITY_DN27480_c0_g1_i1.p1	TRINITY_DN20638_c0_g1_i1.p1	TRINITY_DN79721_c0_g1_i1.p1	TRINITY_DN44002_c0_g1_i1.p1	TRINITY_DN10432_c0_g1_i1.p1	TRINITY_DN32722_c1_g1_i1.p1	TRINITY_DN4017_c1_g1_i1.p1	TRINITY_DN3571_c0_g1_i1.p1	TRINITY_DN1006_c0_g1_i4.p1	TRINITY_DN40757_c0_g1_i1.p1	TRINITY_DN4491_c0_g1_i2.p1	TRINITY_DN12028_c0_g1_i1.p1	TRINITY_DN2120_c0_g2_i1.p1	TRINITY_DN181_c0_g1_i4.p1	TRINITY_DN2252_c0_g1_i2.p1	TRINITY_DN3723_c0_g1_i5.p1	TRINITY_DN2611_c0_g1_i1.p1	TRINITY_DN92673_c0_g1_i2.p1	TRINITY_DN2154_c2_g1_i2.p1	TRINITY_DN7592_c0_g1_i3.p1	TRINITY_DN23307_c0_g1_i1.p1	TRINITY_DN9705_c0_g1_i1.p1	TRINITY_DN29419_c0_g10_i1.p1	TRINITY_DN50431_c0_g1_i1.p1	TRINITY_DN2395_c0_g1_i1.p1
148890at6656	TRUE	40	100	FBpp0075755	TRINITY_DN40700_c0_g1_i1.p1	TRINITY_DN14963_c0_g1_i1.p1	TRINITY_DN45932_c0_g1_i1.p1	c70303_g1_i1.p1	SMAR014139-PA	TRINITY_DN47966_c0_g1_i1.p1	TRINITY_DN12304_c0_g1_i1.p1	TRINITY_DN3345_c0_g1_i2.p1	TRINITY_DN10432_c0_g1_i1.p1	TRINITY_DN3998_c0_g1_i2.p1	TRINITY_DN262_c0_g1_i9.p1	TRINITY_DN1917_c0_g1_i3.p1	TRINITY_DN8473_c0_g1_i2.p1	TRINITY_DN2906_c0_g1_i1.p1	TRINITY_DN5520_c0_g1_i1.p1	TRINITY_DN33123_c4_g1_i1.p1	TRINITY_DN58213_c0_g1_i1.p1	TRINITY_DN153231_c0_g1_i1.p1	TRINITY_DN19547_c0_g1_i1.p1	TRINITY_DN33216_c1_g1_i1.p1	TRINITY_DN14745_c0_g1_i1.p1	TRINITY_DN2055_c0_g1_i1.p1	TRINITY_DN626_c0_g1_i2.p1	TRINITY_DN13593_c0_g1_i2.p1	TRINITY_DN14141_c1_g1_i1.p1	TRINITY_DN6340_c0_g1_i1.p1	TRINITY_DN2305_c0_g2_i1.p1	TRINITY_DN404_c0_g1_i8.p1	TRINITY_DN24308_c0_g1_i1.p1	TRINITY_DN152_c1_g1_i1.p1	TRINITY_DN791_c0_g1_i1.p1	TRINITY_DN511_c0_g1_i1.p1	TRINITY_DN117_c0_g1_i14.p4	TRINITY_DN1360_c0_g1_i4.p1	TRINITY_DN6586_c0_g1_i2.p1	TRINITY_DN40684_c0_g1_i1.p1	TRINITY_DN51884_c0_g1_i1.p1	TRINITY_DN84271_c0_g2_i1.p1	TRINITY_DN959_c0_g2_i1.p1
150765at6656	TRUE	40	100	FBpp0082735	TRINITY_DN390_c0_g1_i1.p1	TRINITY_DN15128_c0_g1_i1.p1	TRINITY_DN41488_c0_g1_i1.p1	c76339_g1_i1.p1	SMAR012523-PA	TRINITY_DN21717_c0_g1_i2.p1	TRINITY_DN85375_c2_g1_i1.p1	TRINITY_DN1928_c0_g1_i2.p1	TRINITY_DN22711_c0_g1_i1.p1	TRINITY_DN16414_c0_g1_i1.p1	TRINITY_DN16574_c0_g1_i1.p1	TRINITY_DN18387_c0_g1_i1.p1	TRINITY_DN38177_c0_g1_i1.p1	TRINITY_DN1735_c0_g1_i1.p1	TRINITY_DN919_c0_g1_i1.p1	TRINITY_DN25521_c0_g2_i1.p1	TRINITY_DN70958_c0_g1_i1.p1	TRINITY_DN79920_c0_g1_i1.p1	TRINITY_DN31270_c0_g1_i1.p1	TRINITY_DN84670_c0_g1_i1.p1	TRINITY_DN3161_c0_g1_i1.p1	TRINITY_DN8586_c0_g1_i1.p1	TRINITY_DN1967_c0_g1_i3.p1	TRINITY_DN1579_c0_g1_i1.p1	TRINITY_DN1378_c0_g1_i1.p1	TRINITY_DN1360_c0_g1_i2.p1	TRINITY_DN4631_c0_g1_i1.p1	TRINITY_DN1980_c0_g1_i2.p1	TRINITY_DN1329_c0_g1_i2.p2	TRINITY_DN4148_c0_g1_i9.p1	TRINITY_DN3290_c0_g1_i1.p1	TRINITY_DN7171_c0_g1_i2.p1	TRINITY_DN3134_c1_g4_i1.p2	TRINITY_DN1188_c0_g2_i1.p1	TRINITY_DN3522_c0_g1_i3.p1	TRINITY_DN23727_c0_g1_i1.p1	TRINITY_DN26616_c0_g2_i1.p1	TRINITY_DN76182_c0_g1_i1.p1	TRINITY_DN16360_c0_g1_i1.p1
77976at6656	FALSE	39	97.5	FBpp0077720	TRINITY_DN9521_c0_g2_i1.p1	TRINITY_DN22819_c0_g1_i1.p1	TRINITY_DN51753_c0_g1_i1.p2	c161210_g1_i1.p1	SMAR006446-PA	TRINITY_DN22419_c0_g1_i1.p1	TRINITY_DN22149_c2_g1_i1.p1	TRINITY_DN18873_c0_g1_i1.p1	TRINITY_DN2049_c0_g1_i1.p1	TRINITY_DN22266_c0_g1_i1.p1	TRINITY_DN28458_c0_g1_i1.p1	TRINITY_DN7980_c0_g1_i2.p2		TRINITY_DN656_c0_g1_i1.p1	TRINITY_DN4987_c0_g1_i1.p1	TRINITY_DN29510_c0_g8_i1.p1	TRINITY_DN69678_c0_g1_i1.p1	TRINITY_DN77523_c0_g1_i1.p1	TRINITY_DN72026_c0_g2_i1.p1	TRINITY_DN34526_c1_g1_i1.p1	TRINITY_DN5103_c0_g1_i4.p1	TRINITY_DN16256_c0_g1_i1.p1	TRINITY_DN845_c0_g1_i43.p2	TRINITY_DN4676_c0_g1_i3.p2	TRINITY_DN589_c0_g1_i1.p1	TRINITY_DN60793_c0_g1_i1.p1	TRINITY_DN5721_c0_g1_i2.p1	TRINITY_DN731_c1_g1_i11.p1	TRINITY_DN5478_c0_g1_i1.p1	TRINITY_DN28183_c0_g1_i1.p1	TRINITY_DN2205_c0_g1_i1.p1	TRINITY_DN4838_c0_g1_i3.p1	TRINITY_DN1558_c0_g1_i2.p2	TRINITY_DN1444_c0_g1_i2.p1	TRINITY_DN6262_c0_g1_i1.p1	TRINITY_DN2578_c0_g2_i1.p1	TRINITY_DN21138_c0_g1_i1.p1	TRINITY_DN87337_c0_g1_i1.p1	TRINITY_DN13399_c20_g1_i1.p1
156081at6656	TRUE	40	100	FBpp0071373	TRINITY_DN57536_c0_g1_i1.p1	TRINITY_DN37758_c0_g1_i1.p1	TRINITY_DN30798_c0_g1_i1.p1	c88530_g1_i2.p1	SMAR007602-PA	TRINITY_DN21852_c0_g2_i1.p1	TRINITY_DN8825_c0_g1_i1.p1	TRINITY_DN1020_c0_g1_i1.p1	TRINITY_DN11574_c0_g1_i1.p1	TRINITY_DN1584_c0_g1_i1.p1	TRINITY_DN17856_c0_g1_i1.p1	TRINITY_DN781_c0_g1_i1.p1	TRINITY_DN29386_c0_g1_i1.p1	TRINITY_DN21650_c0_g1_i1.p1	TRINITY_DN22668_c0_g1_i1.p1	TRINITY_DN33523_c2_g1_i1.p2	TRINITY_DN114573_c0_g1_i1.p1	TRINITY_DN51473_c0_g1_i1.p1	TRINITY_DN46088_c0_g1_i1.p1	TRINITY_DN57049_c0_g1_i1.p1	TRINITY_DN412_c0_g1_i1.p1	TRINITY_DN1238_c0_g2_i1.p1	TRINITY_DN2471_c0_g1_i1.p1	TRINITY_DN6686_c0_g1_i1.p1	TRINITY_DN37861_c0_g1_i1.p1	TRINITY_DN5584_c0_g1_i1.p1	TRINITY_DN1001_c0_g2_i3.p1	TRINITY_DN51910_c0_g1_i1.p1	TRINITY_DN4752_c0_g2_i3.p2	TRINITY_DN588_c0_g1_i1.p1	TRINITY_DN5688_c0_g1_i1.p1	TRINITY_DN285_c0_g2_i1.p1	TRINITY_DN3920_c0_g1_i3.p2	TRINITY_DN1362_c0_g1_i3.p1	TRINITY_DN22906_c0_g1_i1.p1	TRINITY_DN4743_c0_g1_i1.p1	TRINITY_DN31935_c0_g3_i1.p1	TRINITY_DN82966_c0_g1_i1.p1	TRINITY_DN13793_c0_g1_i1.p1
30822at6656	TRUE	40	100	FBpp0073965	TRINITY_DN15438_c0_g2_i2.p1	TRINITY_DN30516_c0_g1_i1.p1	TRINITY_DN51578_c1_g1_i1.p1	c97735_g1_i1.p1	SMAR003229-PA	TRINITY_DN24200_c0_g2_i1.p1	TRINITY_DN7567_c0_g2_i1.p1	TRINITY_DN2964_c0_g1_i11.p1	TRINITY_DN6970_c0_g1_i1.p1	TRINITY_DN20486_c0_g1_i1.p1	TRINITY_DN3304_c0_g1_i1.p1	TRINITY_DN9406_c0_g1_i2.p1	TRINITY_DN53118_c0_g1_i1.p1	TRINITY_DN5003_c0_g1_i1.p1	TRINITY_DN60974_c0_g1_i1.p1	TRINITY_DN33538_c0_g2_i8.p1	TRINITY_DN67959_c0_g1_i1.p1	TRINITY_DN56108_c0_g1_i1.p1	TRINITY_DN81665_c0_g1_i1.p1	TRINITY_DN72159_c0_g1_i1.p1	TRINITY_DN3423_c0_g1_i1.p1	TRINITY_DN1991_c0_g1_i1.p1	TRINITY_DN1504_c0_g1_i2.p1	TRINITY_DN7060_c0_g1_i3.p1	TRINITY_DN74353_c0_g1_i1.p1	TRINITY_DN4910_c0_g2_i5.p1	TRINITY_DN8903_c0_g1_i5.p1	TRINITY_DN3837_c0_g1_i5.p1	TRINITY_DN3441_c0_g1_i1.p1	TRINITY_DN2220_c0_g1_i1.p1	TRINITY_DN6421_c0_g1_i1.p1	TRINITY_DN3532_c0_g1_i12.p1	TRINITY_DN7417_c1_g1_i3.p1	TRINITY_DN4751_c0_g1_i9.p1	TRINITY_DN18213_c0_g1_i1.p1	TRINITY_DN20615_c0_g1_i1.p1	TRINITY_DN7635_c0_g1_i1.p1	TRINITY_DN87901_c0_g1_i1.p1	TRINITY_DN14325_c0_g1_i1.p1
68731at6656	TRUE	40	100	FBpp0079650	TRINITY_DN10465_c0_g1_i1.p1	TRINITY_DN28549_c0_g1_i1.p1	TRINITY_DN43839_c0_g1_i4.p1	c44559_g1_i1.p1	SMAR005807-PA	TRINITY_DN13534_c0_g3_i1.p1	TRINITY_DN28272_c0_g1_i1.p1	TRINITY_DN803_c0_g1_i1.p1	TRINITY_DN2_c0_g1_i2.p1	TRINITY_DN1392_c0_g1_i6.p1	TRINITY_DN11867_c0_g1_i1.p1	TRINITY_DN9778_c0_g1_i2.p1	TRINITY_DN2817_c0_g1_i1.p1	TRINITY_DN713_c0_g1_i4.p1	TRINITY_DN25312_c0_g2_i1.p1	TRINITY_DN33546_c1_g3_i2.p1	TRINITY_DN72379_c0_g2_i1.p1	TRINITY_DN86789_c0_g1_i2.p1	TRINITY_DN37897_c0_g2_i1.p1	TRINITY_DN20794_c0_g1_i1.p1	TRINITY_DN5214_c0_g1_i3.p1	TRINITY_DN3776_c0_g1_i1.p1	TRINITY_DN2098_c0_g1_i1.p1	TRINITY_DN23924_c0_g1_i1.p1	TRINITY_DN49545_c0_g1_i1.p1	TRINITY_DN31549_c0_g1_i1.p1	TRINITY_DN16381_c0_g1_i1.p1	TRINITY_DN2522_c0_g1_i2.p1	TRINITY_DN2435_c0_g1_i1.p1	TRINITY_DN6078_c0_g1_i1.p1	TRINITY_DN885_c0_g1_i2.p1	TRINITY_DN753_c0_g1_i2.p1	TRINITY_DN2318_c0_g1_i3.p1	TRINITY_DN1135_c0_g1_i3.p1	TRINITY_DN1996_c1_g2_i1.p1	TRINITY_DN24499_c0_g1_i2.p1	TRINITY_DN30682_c0_g1_i3.p1	TRINITY_DN152574_c0_g1_i1.p1	TRINITY_DN3343_c0_g1_i1.p1
69742at6656	TRUE	40	100	FBpp0083860	TRINITY_DN15082_c0_g3_i1.p1	TRINITY_DN24960_c0_g1_i1.p1	TRINITY_DN45555_c0_g1_i1.p1	c74814_g1_i1.p1	SMAR013372-PA	TRINITY_DN24140_c0_g1_i1.p1	TRINITY_DN23482_c0_g1_i1.p1	TRINITY_DN10161_c0_g1_i3.p1	TRINITY_DN483_c0_g1_i19.p3	TRINITY_DN16835_c0_g1_i1.p1	TRINITY_DN32535_c0_g1_i1.p1	TRINITY_DN34841_c0_g1_i1.p1	TRINITY_DN39412_c0_g1_i1.p1	TRINITY_DN22242_c0_g1_i1.p1	TRINITY_DN22780_c0_g2_i1.p1	TRINITY_DN24625_c0_g1_i1.p1	TRINITY_DN72140_c0_g1_i1.p1	TRINITY_DN84898_c0_g1_i1.p1	TRINITY_DN63592_c0_g1_i1.p1	TRINITY_DN18290_c0_g1_i1.p1	TRINITY_DN2829_c0_g1_i2.p1	TRINITY_DN17137_c0_g1_i1.p1	TRINITY_DN1000_c0_g1_i1.p1	TRINITY_DN2857_c0_g1_i1.p1	TRINITY_DN9824_c0_g1_i1.p1	TRINITY_DN30468_c0_g1_i1.p1	TRINITY_DN3143_c0_g1_i1.p1	TRINITY_DN7288_c0_g1_i4.p1	TRINITY_DN5586_c0_g1_i1.p1	TRINITY_DN2505_c0_g1_i1.p1	TRINITY_DN11769_c0_g1_i1.p1	TRINITY_DN1471_c0_g1_i6.p1	TRINITY_DN27025_c0_g1_i1.p1	TRINITY_DN4865_c0_g1_i2.p1	TRINITY_DN4869_c0_g1_i1.p2	TRINITY_DN16210_c0_g3_i1.p1	TRINITY_DN30212_c0_g1_i1.p1	TRINITY_DN9697_c0_g1_i1.p1	TRINITY_DN3048_c0_g1_i1.p1
78919at6656	TRUE	40	100	FBpp0083658	TRINITY_DN11397_c0_g1_i1.p1	TRINITY_DN16107_c0_g1_i1.p2	TRINITY_DN45202_c0_g1_i1.p2	c64989_g1_i2.p1	SMAR006772-PA	TRINITY_DN20363_c0_g1_i2.p1	TRINITY_DN34118_c0_g2_i1.p1	TRINITY_DN1211_c2_g1_i9.p2	TRINITY_DN2369_c0_g1_i5.p1	TRINITY_DN1516_c0_g1_i1.p1	TRINITY_DN4217_c0_g1_i1.p1	TRINITY_DN3529_c0_g1_i1.p1	TRINITY_DN3682_c0_g1_i1.p1	TRINITY_DN2248_c0_g1_i1.p1	TRINITY_DN25365_c0_g1_i1.p1	TRINITY_DN21108_c0_g1_i1.p1	TRINITY_DN69683_c0_g1_i1.p1	TRINITY_DN84319_c0_g1_i2.p1	TRINITY_DN33372_c0_g2_i1.p1	TRINITY_DN55755_c0_g2_i1.p1	TRINITY_DN5262_c0_g1_i1.p1	TRINITY_DN30770_c0_g1_i1.p1	TRINITY_DN3549_c0_g1_i2.p1	TRINITY_DN6533_c0_g1_i1.p1	TRINITY_DN32293_c0_g1_i1.p1	TRINITY_DN16155_c0_g1_i1.p1	TRINITY_DN7941_c0_g2_i1.p1	TRINITY_DN8966_c0_g1_i1.p1	TRINITY_DN4077_c0_g1_i1.p2	TRINITY_DN6509_c0_g1_i1.p1	TRINITY_DN1501_c0_g1_i3.p1	TRINITY_DN3456_c0_g1_i1.p1	TRINITY_DN3458_c0_g1_i3.p2	TRINITY_DN8737_c0_g1_i2.p2	TRINITY_DN19679_c0_g1_i1.p1	TRINITY_DN3986_c0_g1_i1.p1	TRINITY_DN25546_c0_g1_i4.p1	TRINITY_DN75509_c0_g1_i1.p1	TRINITY_DN13464_c0_g1_i1.p1
87142at6656	TRUE	40	100	FBpp0079234	TRINITY_DN1225_c0_g1_i1.p1	TRINITY_DN29076_c0_g1_i2.p1	TRINITY_DN51991_c0_g1_i1.p1	c89243_g1_i1.p1	SMAR011475-PA	TRINITY_DN25482_c0_g2_i1.p1	TRINITY_DN73086_c0_g1_i1.p1	TRINITY_DN2498_c0_g1_i3.p1	TRINITY_DN5103_c0_g1_i3.p1	TRINITY_DN6812_c0_g1_i1.p1	TRINITY_DN17731_c0_g1_i2.p1	TRINITY_DN13579_c0_g1_i1.p1	TRINITY_DN40109_c0_g1_i1.p1	TRINITY_DN17724_c0_g1_i1.p1	TRINITY_DN16497_c0_g1_i1.p1	TRINITY_DN28214_c0_g1_i1.p1	TRINITY_DN53655_c0_g1_i1.p1	TRINITY_DN84678_c0_g1_i2.p1	TRINITY_DN24435_c0_g1_i1.p1	TRINITY_DN83625_c0_g1_i1.p1	TRINITY_DN1321_c1_g2_i3.p1	TRINITY_DN2647_c0_g4_i1.p1	TRINITY_DN13702_c0_g1_i1.p1	TRINITY_DN4583_c0_g1_i2.p1	TRINITY_DN76969_c0_g1_i1.p1	TRINITY_DN64753_c0_g1_i2.p1	TRINITY_DN12015_c0_g1_i1.p1	TRINITY_DN9868_c0_g1_i2.p1	TRINITY_DN1697_c0_g1_i6.p2	TRINITY_DN738_c0_g1_i3.p2	TRINITY_DN18334_c0_g1_i2.p1	TRINITY_DN5514_c0_g1_i13.p1	TRINITY_DN18889_c0_g1_i1.p1	TRINITY_DN13137_c0_g1_i1.p1	TRINITY_DN11659_c0_g1_i1.p1	TRINITY_DN24117_c0_g1_i1.p1	TRINITY_DN30726_c0_g4_i5.p1	TRINITY_DN81602_c0_g2_i1.p1	TRINITY_DN7208_c0_g1_i1.p1
133362at6656	TRUE	40	100	FBpp0087227	TRINITY_DN39303_c0_g1_i1.p1	TRINITY_DN61819_c0_g1_i1.p1	TRINITY_DN45386_c0_g1_i1.p1	c81252_g1_i1.p1	SMAR000507-PA	TRINITY_DN22997_c0_g1_i1.p1	TRINITY_DN24144_c0_g1_i2.p1	TRINITY_DN10757_c0_g1_i1.p1	TRINITY_DN20024_c0_g1_i1.p1	TRINITY_DN4973_c0_g1_i2.p1	TRINITY_DN5509_c0_g1_i1.p1	TRINITY_DN34165_c0_g1_i1.p1	TRINITY_DN1832_c0_g1_i1.p1	TRINITY_DN1411_c0_g1_i2.p1	TRINITY_DN30283_c0_g1_i1.p1	TRINITY_DN64060_c0_g1_i1.p1	TRINITY_DN56874_c0_g1_i1.p1	TRINITY_DN79344_c0_g2_i5.p1	TRINITY_DN60217_c0_g1_i1.p1	TRINITY_DN53794_c0_g1_i1.p1	TRINITY_DN42801_c0_g1_i1.p1	TRINITY_DN4848_c0_g1_i1.p1	TRINITY_DN1832_c0_g1_i1.p1	TRINITY_DN40077_c0_g1_i1.p1	TRINITY_DN92038_c0_g1_i1.p1	TRINITY_DN6726_c0_g2_i1.p1	TRINITY_DN4348_c0_g1_i2.p1	TRINITY_DN537_c0_g1_i2.p1	TRINITY_DN18561_c0_g1_i1.p1	TRINITY_DN14182_c0_g1_i1.p1	TRINITY_DN17946_c0_g1_i1.p1	TRINITY_DN409_c0_g1_i2.p1	TRINITY_DN26192_c0_g1_i1.p1	TRINITY_DN30551_c0_g1_i1.p1	TRINITY_DN1415_c0_g1_i1.p1	TRINITY_DN15079_c0_g1_i1.p1	TRINITY_DN26149_c0_g1_i1.p1	TRINITY_DN72790_c0_g1_i1.p1	TRINITY_DN12115_c0_g1_i1.p1
101886at6656	TRUE	39	97.5	FBpp0072801	TRINITY_DN6640_c0_g1_i1.p1	TRINITY_DN49825_c0_g1_i1.p2	TRINITY_DN107552_c0_g1_i1.p1	c80223_g1_i1.p1	SMAR005519-PA	TRINITY_DN39898_c0_g1_i1.p2	TRINITY_DN103146_c2_g1_i1.p1	TRINITY_DN1319_c0_g1_i2.p2	TRINITY_DN12005_c0_g2_i1.p1	TRINITY_DN587_c0_g1_i1.p1	TRINITY_DN17549_c0_g1_i1.p1	TRINITY_DN77_c0_g1_i1.p1	TRINITY_DN4580_c0_g1_i1.p1	TRINITY_DN513_c0_g1_i1.p1	TRINITY_DN26521_c0_g1_i2.p1	TRINITY_DN25802_c0_g1_i2.p1	TRINITY_DN61555_c0_g1_i1.p1	TRINITY_DN78265_c0_g1_i2.p1		TRINITY_DN54183_c0_g1_i1.p1	TRINITY_DN6325_c0_g1_i1.p2	TRINITY_DN620_c0_g1_i1.p1	TRINITY_DN1903_c0_g1_i1.p1	TRINITY_DN16014_c0_g1_i1.p1	TRINITY_DN84511_c0_g1_i1.p1	TRINITY_DN41485_c0_g1_i1.p1	TRINITY_DN6468_c0_g3_i1.p1	TRINITY_DN153_c0_g1_i1.p1	TRINITY_DN1255_c0_g1_i1.p4	TRINITY_DN285_c0_g1_i1.p2	TRINITY_DN13818_c0_g1_i1.p1	TRINITY_DN21811_c0_g1_i4.p1	TRINITY_DN2087_c0_g1_i3.p1	TRINITY_DN725_c0_g1_i2.p1	TRINITY_DN18149_c0_g1_i1.p1	TRINITY_DN26171_c0_g1_i1.p1	TRINITY_DN51526_c0_g1_i1.p1	TRINITY_DN85379_c0_g1_i1.p1	TRINITY_DN2075_c0_g1_i1.p1
98927at6656	FALSE	40	100	FBpp0077043	TRINITY_DN7087_c0_g1_i1.p1	TRINITY_DN6692_c0_g1_i1.p1	TRINITY_DN30608_c0_g1_i1.p1	c91591_g1_i2.p1	SMAR002680-PA	TRINITY_DN23945_c1_g1_i1.p2	TRINITY_DN25995_c0_g1_i1.p1	TRINITY_DN52_c0_g1_i1.p2	TRINITY_DN141_c0_g1_i26.p2	TRINITY_DN18651_c0_g1_i1.p1	TRINITY_DN1004_c0_g1_i17.p1	TRINITY_DN8135_c0_g2_i2.p1	TRINITY_DN9310_c0_g1_i2.p1	TRINITY_DN1689_c0_g1_i1.p1	TRINITY_DN1673_c0_g1_i1.p1	TRINITY_DN32641_c10_g7_i11.p3	TRINITY_DN70777_c0_g2_i4.p1	TRINITY_DN75414_c0_g1_i1.p1	TRINITY_DN43350_c0_g2_i1.p1	TRINITY_DN82307_c0_g1_i1.p1	TRINITY_DN7215_c0_g1_i2.p1	TRINITY_DN9951_c1_g1_i2.p1	TRINITY_DN4239_c0_g1_i1.p1	TRINITY_DN6830_c0_g1_i2.p1	TRINITY_DN6636_c0_g1_i1.p1	TRINITY_DN54916_c0_g1_i1.p1	TRINITY_DN4293_c0_g1_i3.p1	TRINITY_DN11259_c0_g1_i1.p1	TRINITY_DN1190_c0_g1_i1.p1	TRINITY_DN2122_c0_g1_i1.p1	TRINITY_DN1518_c0_g5_i1.p1	TRINITY_DN1890_c0_g1_i1.p1	TRINITY_DN1890_c1_g1_i13.p2	TRINITY_DN14126_c0_g1_i1.p1	TRINITY_DN153_c0_g1_i1.p2	TRINITY_DN8407_c0_g1_i1.p1	TRINITY_DN24016_c0_g1_i1.p1	TRINITY_DN64679_c0_g2_i1.p1	TRINITY_DN11932_c1_g1_i1.p1
100760at6656	FALSE	39	97.5	FBpp0071240	TRINITY_DN413_c0_g1_i1.p1	TRINITY_DN30846_c0_g1_i3.p1	TRINITY_DN52937_c6_g2_i2.p1	c94503_g2_i1.p1	SMAR013619-PA	TRINITY_DN24447_c0_g2_i1.p1	TRINITY_DN52637_c0_g1_i1.p1	TRINITY_DN12867_c0_g1_i1.p1	TRINITY_DN1728_c0_g1_i1.p1	TRINITY_DN7430_c0_g1_i1.p1	TRINITY_DN1905_c0_g1_i1.p1	TRINITY_DN2393_c0_g1_i1.p1	TRINITY_DN22682_c0_g1_i1.p1	TRINITY_DN13282_c0_g1_i1.p1	TRINITY_DN9921_c0_g1_i1.p1	TRINITY_DN33328_c2_g5_i3.p2	TRINITY_DN25945_c0_g2_i1.p1	TRINITY_DN90710_c0_g1_i1.p1		TRINITY_DN63467_c5_g3_i1.p1	TRINITY_DN33987_c0_g1_i1.p1	TRINITY_DN4292_c0_g1_i1.p1	TRINITY_DN2806_c0_g1_i3.p1	TRINITY_DN8133_c0_g1_i1.p1	TRINITY_DN72076_c0_g1_i1.p1	TRINITY_DN9922_c0_g1_i1.p1	TRINITY_DN10772_c0_g1_i1.p1	TRINITY_DN2624_c0_g1_i20.p1	TRINITY_DN4062_c0_g2_i14.p1	TRINITY_DN28040_c0_g1_i1.p1	TRINITY_DN5296_c0_g1_i1.p1	TRINITY_DN94115_c0_g1_i6.p1	TRINITY_DN2729_c0_g1_i1.p1	TRINITY_DN4590_c0_g1_i2.p1	TRINITY_DN4329_c0_g1_i2.p1	TRINITY_DN25032_c0_g1_i3.p1	TRINITY_DN29679_c1_g4_i2.p1	TRINITY_DN65017_c0_g2_i1.p1	TRINITY_DN13146_c9_g3_i1.p1
109484at6656	TRUE	39	97.5	FBpp0079607	TRINITY_DN14395_c0_g1_i1.p1	TRINITY_DN27546_c0_g2_i1.p1	TRINITY_DN47030_c0_g1_i1.p1	c89880_g1_i3.p1	SMAR003339-PA	TRINITY_DN13188_c0_g2_i1.p1	TRINITY_DN38836_c2_g1_i2.p1	TRINITY_DN1466_c0_g2_i1.p1	TRINITY_DN787_c0_g1_i1.p1	TRINITY_DN8815_c0_g1_i1.p1	TRINITY_DN19307_c0_g1_i1.p1	TRINITY_DN4499_c1_g1_i1.p1	TRINITY_DN2361_c0_g2_i2.p1	TRINITY_DN76_c0_g1_i1.p1	TRINITY_DN81584_c0_g1_i1.p1	TRINITY_DN8251_c0_g1_i1.p1	TRINITY_DN63302_c0_g1_i1.p1	TRINITY_DN82988_c0_g1_i1.p1		TRINITY_DN31269_c1_g1_i1.p1	TRINITY_DN1084_c0_g1_i1.p1	TRINITY_DN31637_c0_g1_i2.p1	TRINITY_DN3416_c0_g1_i1.p1	TRINITY_DN19_c0_g2_i1.p1	TRINITY_DN32776_c0_g1_i1.p1	TRINITY_DN1419_c0_g1_i2.p1	TRINITY_DN5696_c0_g1_i1.p1	TRINITY_DN2298_c0_g1_i1.p1	TRINITY_DN1488_c0_g2_i1.p1	TRINITY_DN19_c0_g1_i2.p1	TRINITY_DN3622_c0_g3_i1.p1	TRINITY_DN2781_c0_g1_i7.p1	TRINITY_DN206_c0_g1_i1.p1	TRINITY_DN112_c0_g2_i1.p1	TRINITY_DN167_c0_g2_i1.p2	TRINITY_DN1289_c0_g1_i1.p1	TRINITY_DN30344_c0_g2_i1.p1	TRINITY_DN27996_c0_g1_i1.p1	TRINITY_DN2345_c0_g1_i1.p1
125452at6656	TRUE	39	97.5	FBpp0074964	TRINITY_DN16908_c0_g1_i2.p1	TRINITY_DN33619_c0_g1_i1.p2	TRINITY_DN52593_c8_g4_i1.p2	c88540_g1_i1.p2	SMAR015661-PA	TRINITY_DN25902_c0_g1_i1.p1	TRINITY_DN41758_c2_g4_i1.p1	TRINITY_DN1155_c0_g1_i2.p1	TRINITY_DN4082_c0_g1_i29.p2	TRINITY_DN21744_c0_g1_i1.p1	TRINITY_DN5092_c0_g2_i1.p1	TRINITY_DN9883_c0_g1_i1.p2	TRINITY_DN1253_c0_g1_i1.p1	TRINITY_DN12715_c0_g1_i1.p1	TRINITY_DN11471_c0_g1_i1.p1	TRINITY_DN31598_c19_g1_i1.p1	TRINITY_DN65254_c0_g1_i2.p1	TRINITY_DN61884_c0_g1_i1.p1		TRINITY_DN66919_c0_g1_i1.p1	TRINITY_DN6089_c0_g1_i1.p1	TRINITY_DN26990_c0_g1_i1.p1	TRINITY_DN22644_c0_g1_i1.p1	TRINITY_DN700_c0_g1_i1.p1	TRINITY_DN90144_c0_g1_i1.p2	TRINITY_DN63476_c0_g1_i1.p1	TRINITY_DN2432_c0_g1_i2.p1	TRINITY_DN1740_c0_g1_i11.p1	TRINITY_DN2655_c0_g2_i36.p1	TRINITY_DN5957_c0_g1_i2.p2	TRINITY_DN18566_c0_g1_i1.p1	TRINITY_DN3538_c0_g1_i10.p1	TRINITY_DN285_c0_g1_i2.p1	TRINITY_DN1516_c0_g2_i8.p1	TRINITY_DN10406_c0_g1_i1.p1	TRINITY_DN15673_c0_g2_i1.p1	TRINITY_DN28088_c0_g1_i4.p1	TRINITY_DN84438_c2_g1_i1.p1	TRINITY_DN6260_c0_g1_i1.p1
139638at6656	TRUE	39	97.5	FBpp0077282	TRINITY_DN40601_c0_g1_i1.p1	TRINITY_DN28754_c0_g2_i1.p2	TRINITY_DN84946_c0_g1_i1.p2	c80589_g1_i1.p1	SMAR010562-PA	TRINITY_DN12459_c0_g1_i1.p1	TRINITY_DN104403_c0_g1_i1.p1	TRINITY_DN26496_c0_g1_i1.p1	TRINITY_DN10177_c0_g1_i1.p2	TRINITY_DN5424_c0_g1_i1.p1	TRINITY_DN3809_c0_g1_i1.p1	TRINITY_DN29327_c0_g1_i1.p1	TRINITY_DN4971_c0_g1_i3.p1	TRINITY_DN30834_c0_g1_i1.p1	TRINITY_DN1109_c0_g1_i1.p1	TRINITY_DN26261_c1_g2_i1.p1	TRINITY_DN58923_c0_g1_i1.p1	TRINITY_DN66819_c0_g1_i1.p1	TRINITY_DN23374_c0_g1_i1.p1		TRINITY_DN37258_c0_g1_i1.p1	TRINITY_DN2833_c0_g2_i1.p1	TRINITY_DN4161_c0_g1_i1.p1	TRINITY_DN12328_c0_g1_i2.p2	TRINITY_DN183_c0_g1_i13.p1	TRINITY_DN2224_c0_g1_i1.p1	TRINITY_DN12171_c0_g1_i2.p1	TRINITY_DN21540_c0_g1_i15.p2	TRINITY_DN3873_c1_g1_i10.p2	TRINITY_DN31822_c0_g1_i1.p2	TRINITY_DN501_c0_g1_i1.p2	TRINITY_DN296_c0_g1_i13.p1	TRINITY_DN2969_c0_g2_i2.p2	TRINITY_DN1426_c0_g1_i3.p1	TRINITY_DN651_c0_g2_i1.p1	TRINITY_DN23447_c0_g2_i1.p1	TRINITY_DN22509_c0_g1_i1.p1	TRINITY_DN1840_c0_g1_i1.p1	TRINITY_DN11998_c0_g2_i1.p1
107806at6656	FALSE	39	97.5	FBpp0070205	TRINITY_DN903_c0_g1_i1.p1	TRINITY_DN30900_c0_g1_i1.p1	TRINITY_DN51227_c0_g1_i1.p1	c97697_g1_i1.p2	SMAR010400-PA	TRINITY_DN27354_c0_g1_i1.p1	TRINITY_DN24719_c0_g1_i1.p1	TRINITY_DN1914_c0_g1_i1.p1	TRINITY_DN753_c0_g1_i1.p1	TRINITY_DN1322_c0_g1_i3.p1	TRINITY_DN678_c0_g1_i1.p1	TRINITY_DN426_c0_g1_i1.p1	TRINITY_DN100_c0_g1_i1.p1	TRINITY_DN798_c1_g2_i3.p1		TRINITY_DN31968_c1_g3_i1.p1	TRINITY_DN73486_c0_g1_i1.p1	TRINITY_DN51035_c0_g1_i1.p1	TRINITY_DN76126_c0_g1_i1.p1	TRINITY_DN78086_c0_g1_i1.p1	TRINITY_DN3878_c0_g1_i3.p1	TRINITY_DN5940_c0_g1_i2.p1	TRINITY_DN5690_c0_g1_i1.p1	TRINITY_DN7844_c0_g1_i1.p1	TRINITY_DN85250_c0_g1_i1.p1	TRINITY_DN2259_c0_g1_i1.p1	TRINITY_DN17359_c0_g1_i1.p1	TRINITY_DN8468_c0_g1_i1.p1	TRINITY_DN939_c0_g1_i4.p1	TRINITY_DN3558_c0_g1_i3.p1	TRINITY_DN1496_c0_g1_i4.p1	TRINITY_DN6868_c0_g1_i2.p1	TRINITY_DN323_c0_g1_i1.p1	TRINITY_DN4847_c0_g1_i16.p1	TRINITY_DN2312_c1_g2_i1.p1	TRINITY_DN15794_c0_g3_i1.p1	TRINITY_DN29256_c1_g1_i2.p1	TRINITY_DN90358_c4_g1_i1.p1	TRINITY_DN12839_c0_g1_i1.p1
147723at6656	TRUE	39	97.5	FBpp0079324	TRINITY_DN60539_c0_g1_i1.p1	TRINITY_DN38241_c0_g1_i1.p1	TRINITY_DN52346_c5_g4_i1.p1	c63976_g1_i1.p1	SMAR004196-PA	TRINITY_DN18035_c0_g1_i1.p1	TRINITY_DN85050_c0_g1_i1.p1	TRINITY_DN6480_c0_g1_i2.p1	TRINITY_DN13173_c0_g1_i1.p1	TRINITY_DN17326_c0_g1_i1.p1	TRINITY_DN8806_c0_g1_i1.p1	TRINITY_DN3178_c0_g1_i1.p1		TRINITY_DN340_c0_g1_i1.p1	TRINITY_DN33238_c0_g1_i1.p2	TRINITY_DN17593_c0_g1_i1.p1	TRINITY_DN4235_c0_g1_i1.p1	TRINITY_DN74457_c1_g1_i1.p1	TRINITY_DN45346_c0_g1_i1.p1	TRINITY_DN30423_c0_g1_i1.p1	TRINITY_DN1902_c1_g4_i1.p1	TRINITY_DN110_c0_g1_i1.p1	TRINITY_DN14062_c0_g1_i1.p1	TRINITY_DN3011_c0_g1_i1.p1	TRINITY_DN2266_c0_g1_i1.p1	TRINITY_DN976_c0_g1_i1.p1	TRINITY_DN39891_c0_g1_i1.p1	TRINITY_DN48367_c0_g1_i1.p1	TRINITY_DN858_c0_g1_i4.p5	TRINITY_DN12861_c0_g1_i1.p1	TRINITY_DN5018_c0_g1_i1.p1	TRINITY_DN1335_c0_g1_i8.p1	TRINITY_DN406_c2_g2_i1.p1	TRINITY_DN687_c0_g1_i1.p1	TRINITY_DN11079_c0_g1_i1.p2	TRINITY_DN9246_c0_g1_i1.p1	TRINITY_DN24871_c0_g1_i1.p1	TRINITY_DN76133_c0_g1_i2.p1	TRINITY_DN6235_c0_g1_i1.p1
109793at6656	FALSE	38	95	FBpp0087342	TRINITY_DN77784_c0_g1_i1.p1	TRINITY_DN24594_c0_g1_i1.p1	TRINITY_DN47637_c0_g1_i1.p1	c77537_g1_i1.p1	SMAR006112-PA	TRINITY_DN20933_c0_g2_i1.p1	TRINITY_DN31325_c0_g1_i1.p1	TRINITY_DN6427_c0_g1_i1.p1	TRINITY_DN23091_c0_g1_i1.p1	TRINITY_DN20605_c0_g1_i1.p1	TRINITY_DN13562_c0_g1_i1.p1	TRINITY_DN284_c0_g1_i1.p1	TRINITY_DN1885_c0_g1_i4.p1	TRINITY_DN23496_c0_g1_i1.p1	TRINITY_DN17429_c0_g1_i1.p1	TRINITY_DN38199_c2_g1_i1.p1	TRINITY_DN64949_c0_g2_i2.p1	TRINITY_DN86859_c1_g2_i1.p1			TRINITY_DN38231_c0_g1_i1.p1	TRINITY_DN1006_c1_g1_i1.p1	TRINITY_DN1329_c0_g1_i10.p2	TRINITY_DN33739_c0_g1_i1.p1	TRINITY_DN1902_c0_g1_i1.p1	TRINITY_DN4772_c0_g1_i1.p1	TRINITY_DN4365_c0_g2_i2.p1	TRINITY_DN1835_c0_g1_i2.p1	TRINITY_DN2124_c0_g1_i2.p2	TRINITY_DN114_c0_g1_i1.p1	TRINITY_DN1451_c0_g1_i1.p1	TRINITY_DN1780_c0_g1_i18.p1	TRINITY_DN1492_c4_g1_i1.p1	TRINITY_DN2441_c0_g1_i2.p1	TRINITY_DN27011_c0_g1_i1.p1	TRINITY_DN27432_c0_g1_i1.p1	TRINITY_DN29211_c0_g1_i1.p1	TRINITY_DN86478_c2_g1_i1.p1	TRINITY_DN5961_c0_g2_i1.p1
111851at6656	FALSE	39	97.5	FBpp0070765	TRINITY_DN15873_c0_g3_i1.p1	TRINITY_DN33300_c0_g1_i3.p1	TRINITY_DN52119_c0_g1_i2.p1	c98760_g3_i2.p1	SMAR002227-PA	TRINITY_DN26813_c0_g3_i2.p1	TRINITY_DN27424_c0_g3_i1.p1	TRINITY_DN1205_c0_g1_i2.p1	TRINITY_DN79_c0_g1_i12.p1	TRINITY_DN456_c0_g1_i5.p1	TRINITY_DN1289_c0_g2_i1.p1	TRINITY_DN552_c0_g1_i9.p1	TRINITY_DN73_c0_g1_i1.p1	TRINITY_DN798_c1_g1_i3.p1	TRINITY_DN29107_c0_g9_i1.p1	TRINITY_DN29076_c3_g1_i1.p1	TRINITY_DN19278_c0_g1_i1.p1	TRINITY_DN59462_c0_g1_i1.p1	TRINITY_DN33392_c0_g2_i1.p1		TRINITY_DN1969_c1_g1_i4.p1	TRINITY_DN136_c0_g1_i31.p1	TRINITY_DN1389_c0_g1_i8.p1	TRINITY_DN759_c0_g1_i2.p1	TRINITY_DN100_c0_g1_i5.p1	TRINITY_DN789_c0_g1_i10.p1	TRINITY_DN4323_c0_g1_i1.p1	TRINITY_DN1502_c0_g2_i7.p1	TRINITY_DN301_c0_g1_i12.p1	TRINITY_DN2947_c0_g1_i24.p1	TRINITY_DN3863_c0_g1_i4.p1	TRINITY_DN5355_c0_g1_i9.p2	TRINITY_DN2782_c0_g1_i3.p1	TRINITY_DN1873_c0_g1_i51.p1	TRINITY_DN1919_c0_g1_i1.p1	TRINITY_DN25878_c0_g1_i2.p1	TRINITY_DN29672_c2_g4_i1.p1	TRINITY_DN92521_c0_g1_i5.p1	TRINITY_DN13345_c0_g1_i1.p1
112281at6656	FALSE	38	95	FBpp0078268	TRINITY_DN3665_c0_g1_i1.p1	TRINITY_DN26361_c0_g1_i2.p1	TRINITY_DN51366_c0_g1_i1.p1	c92812_g1_i2.p1	SMAR007307-PA	TRINITY_DN26023_c0_g2_i2.p1	TRINITY_DN39494_c3_g1_i1.p1	TRINITY_DN11952_c0_g1_i1.p1	TRINITY_DN5956_c0_g1_i2.p1	TRINITY_DN2365_c0_g1_i1.p1	TRINITY_DN1145_c0_g1_i2.p1	TRINITY_DN3502_c0_g1_i1.p1		TRINITY_DN1796_c0_g1_i1.p1	TRINITY_DN30450_c0_g1_i1.p1	TRINITY_DN31323_c0_g3_i1.p1	TRINITY_DN73047_c0_g1_i1.p1	TRINITY_DN86213_c3_g1_i4.p1	TRINITY_DN36896_c0_g1_i1.p1	TRINITY_DN85434_c0_g1_i1.p1	TRINITY_DN16927_c0_g1_i1.p1	TRINITY_DN12977_c0_g1_i1.p1	TRINITY_DN1075_c0_g1_i5.p1	TRINITY_DN2325_c0_g1_i2.p1	TRINITY_DN1672_c0_g2_i1.p1	TRINITY_DN3880_c0_g1_i1.p1	TRINITY_DN662_c0_g1_i1.p1	TRINITY_DN1766_c0_g1_i53.p2	TRINITY_DN3266_c0_g1_i2.p1	TRINITY_DN4892_c0_g1_i5.p2	TRINITY_DN2605_c0_g2_i1.p1	TRINITY_DN54_c0_g1_i4.p1	TRINITY_DN277_c0_g2_i1.p1	TRINITY_DN3422_c0_g1_i3.p1	TRINITY_DN27016_c0_g1_i1.p1		TRINITY_DN31095_c1_g11_i33.p1	TRINITY_DN161256_c0_g1_i1.p1	TRINITY_DN11295_c0_g1_i1.p1
156111at6656	TRUE	39	97.5	FBpp0080329	TRINITY_DN31830_c0_g1_i1.p1	TRINITY_DN31426_c1_g1_i1.p2	TRINITY_DN86198_c0_g1_i1.p1	c718_g1_i1.p1		TRINITY_DN26749_c0_g1_i1.p3	TRINITY_DN28092_c0_g1_i1.p1	TRINITY_DN1151_c0_g1_i1.p2	TRINITY_DN2390_c0_g1_i1.p2	TRINITY_DN3509_c0_g1_i2.p2	TRINITY_DN2009_c0_g1_i1.p1	TRINITY_DN2074_c0_g1_i2.p1	TRINITY_DN429_c0_g1_i2.p1	TRINITY_DN26490_c0_g1_i1.p2	TRINITY_DN18982_c0_g1_i1.p2	TRINITY_DN31070_c0_g2_i2.p2	TRINITY_DN70406_c0_g1_i1.p1	TRINITY_DN74312_c0_g1_i3.p1	TRINITY_DN46858_c0_g1_i1.p1	TRINITY_DN82492_c0_g2_i1.p1	TRINITY_DN6583_c0_g1_i1.p1	TRINITY_DN12968_c0_g1_i1.p1	TRINITY_DN1036_c0_g1_i1.p2	TRINITY_DN735_c0_g1_i2.p2	TRINITY_DN38553_c0_g1_i1.p1	TRINITY_DN1219_c0_g1_i2.p1	TRINITY_DN2656_c0_g1_i2.p2	TRINITY_DN56755_c0_g1_i1.p1	TRINITY_DN1273_c0_g1_i1.p2	TRINITY_DN3034_c0_g1_i1.p2	TRINITY_DN1951_c0_g1_i11.p2	TRINITY_DN95_c0_g1_i7.p1	TRINITY_DN192_c0_g1_i12.p1	TRINITY_DN1786_c0_g1_i2.p1	TRINITY_DN8455_c0_g1_i1.p1	TRINITY_DN27459_c0_g1_i1.p1	TRINITY_DN1056_c0_g1_i1.p1	TRINITY_DN9144_c0_g1_i1.p1	TRINITY_DN11898_c0_g1_i1.p2
56836at6656	TRUE	39	97.5	FBpp0087935	TRINITY_DN16509_c0_g5_i1.p1	TRINITY_DN5907_c0_g1_i1.p1	TRINITY_DN85005_c0_g1_i1.p1	c24240_g1_i1.p1	SMAR015749-PA	TRINITY_DN25532_c0_g2_i1.p1	TRINITY_DN27218_c0_g2_i1.p1	TRINITY_DN9459_c0_g1_i2.p1	TRINITY_DN7793_c0_g1_i1.p1	TRINITY_DN3313_c0_g1_i1.p1	TRINITY_DN26934_c0_g1_i1.p1	TRINITY_DN1890_c0_g1_i5.p1		TRINITY_DN6543_c0_g1_i1.p1	TRINITY_DN62045_c0_g1_i1.p1	TRINITY_DN29290_c0_g1_i1.p1	TRINITY_DN72417_c0_g1_i3.p1	TRINITY_DN83093_c0_g2_i1.p1	TRINITY_DN44692_c0_g2_i1.p1	TRINITY_DN35027_c0_g1_i1.p1	TRINITY_DN5751_c0_g1_i2.p1	TRINITY_DN2079_c3_g1_i2.p1	TRINITY_DN1612_c0_g1_i1.p1	TRINITY_DN2352_c0_g1_i5.p1	TRINITY_DN682_c0_g1_i1.p1	TRINITY_DN1281_c0_g1_i12.p1	TRINITY_DN2888_c0_g1_i14.p1	TRINITY_DN1781_c0_g1_i4.p2	TRINITY_DN2457_c0_g1_i1.p2	TRINITY_DN1461_c0_g1_i2.p1	TRINITY_DN13629_c0_g1_i1.p1	TRINITY_DN3034_c0_g1_i2.p1	TRINITY_DN1046_c0_g1_i4.p1	TRINITY_DN2734_c0_g1_i2.p1	TRINITY_DN13686_c0_g1_i1.p1	TRINITY_DN19282_c0_g1_i1.p1	TRINITY_DN13280_c0_g3_i1.p1	TRINITY_DN67945_c0_g1_i1.p1	TRINITY_DN13378_c20_g1_i1.p1
68876at6656	TRUE	39	97.5	FBpp0079462	TRINITY_DN11986_c0_g1_i1.p1	TRINITY_DN44167_c1_g1_i1.p1	TRINITY_DN44253_c0_g1_i1.p1	c87682_g1_i1.p1	SMAR004282-PA	TRINITY_DN28864_c1_g1_i1.p1	TRINITY_DN19153_c0_g1_i1.p1	TRINITY_DN101_c1_g1_i1.p1	TRINITY_DN132_c0_g1_i2.p1	TRINITY_DN811_c0_g1_i1.p1	TRINITY_DN64_c0_g1_i1.p1	TRINITY_DN189_c0_g2_i4.p1		TRINITY_DN2567_c0_g1_i2.p1	TRINITY_DN30614_c0_g1_i1.p1	TRINITY_DN25810_c0_g1_i1.p1	TRINITY_DN73157_c0_g1_i3.p1	TRINITY_DN85856_c0_g1_i2.p1	TRINITY_DN41746_c0_g3_i1.p1	TRINITY_DN60838_c1_g1_i1.p1	TRINITY_DN1126_c3_g1_i1.p1	TRINITY_DN108_c0_g1_i4.p1	TRINITY_DN2264_c0_g1_i1.p1	TRINITY_DN4923_c0_g1_i2.p1	TRINITY_DN1088_c0_g1_i1.p1	TRINITY_DN452_c0_g2_i1.p1	TRINITY_DN6395_c0_g1_i1.p1	TRINITY_DN133_c0_g2_i4.p1	TRINITY_DN483_c0_g1_i6.p1	TRINITY_DN798_c0_g3_i1.p1	TRINITY_DN94_c0_g1_i2.p1	TRINITY_DN542_c0_g1_i9.p1	TRINITY_DN106_c0_g2_i2.p1	TRINITY_DN98_c0_g1_i7.p1	TRINITY_DN304_c0_g1_i2.p1	TRINITY_DN7234_c0_g1_i1.p1	TRINITY_DN29997_c0_g5_i4.p1	TRINITY_DN61087_c0_g2_i1.p1	TRINITY_DN11558_c0_g1_i1.p1
117399at6656	FALSE	39	97.5	FBpp0075118	TRINITY_DN27475_c0_g1_i1.p1	TRINITY_DN22601_c0_g1_i1.p1	TRINITY_DN52323_c0_g1_i1.p1	c90068_g1_i2.p1	SMAR005236-PA	TRINITY_DN26629_c0_g3_i1.p1	TRINITY_DN26180_c0_g2_i1.p1	TRINITY_DN17384_c0_g1_i1.p1	TRINITY_DN943_c0_g1_i5.p2	TRINITY_DN8041_c0_g1_i1.p1	TRINITY_DN557_c0_g1_i4.p1	TRINITY_DN686_c0_g1_i10.p2	TRINITY_DN3204_c0_g1_i3.p1	TRINITY_DN3806_c0_g1_i1.p1	TRINITY_DN4871_c0_g2_i2.p1	TRINITY_DN25791_c0_g1_i3.p1	TRINITY_DN36585_c0_g1_i1.p2	TRINITY_DN75096_c0_g1_i1.p1		TRINITY_DN3432_c0_g1_i1.p1	TRINITY_DN13857_c1_g1_i1.p1	TRINITY_DN6207_c0_g1_i1.p1	TRINITY_DN3848_c0_g1_i1.p1	TRINITY_DN991_c0_g1_i1.p2	TRINITY_DN85419_c0_g1_i1.p1	TRINITY_DN2179_c0_g1_i1.p1	TRINITY_DN42750_c0_g1_i1.p1	TRINITY_DN5172_c0_g1_i1.p1	TRINITY_DN3275_c0_g1_i2.p1	TRINITY_DN4636_c0_g1_i3.p1	TRINITY_DN13995_c0_g1_i1.p1	TRINITY_DN1896_c0_g1_i2.p1	TRINITY_DN1043_c2_g1_i1.p1	TRINITY_DN5355_c0_g1_i1.p1	TRINITY_DN17815_c0_g1_i1.p1	TRINITY_DN17279_c0_g1_i1.p1	TRINITY_DN30300_c1_g1_i3.p1	TRINITY_DN91748_c0_g1_i1.p1	TRINITY_DN13254_c1_g1_i1.p1
71110at6656	TRUE	39	97.5	FBpp0073134	TRINITY_DN17214_c0_g1_i1.p1	TRINITY_DN33771_c0_g1_i1.p2	TRINITY_DN98246_c0_g1_i1.p1	c91694_g1_i1.p1	SMAR000435-PA	TRINITY_DN22788_c0_g1_i1.p1	TRINITY_DN40622_c0_g2_i3.p1	TRINITY_DN1521_c0_g1_i6.p1	TRINITY_DN2913_c0_g1_i2.p1	TRINITY_DN386_c0_g1_i2.p1	TRINITY_DN18296_c0_g1_i1.p1	TRINITY_DN34839_c0_g1_i1.p1	TRINITY_DN55616_c0_g1_i1.p2	TRINITY_DN5124_c0_g2_i2.p1	TRINITY_DN29686_c0_g1_i1.p1	TRINITY_DN29198_c0_g2_i1.p1	TRINITY_DN70214_c0_g1_i4.p1	TRINITY_DN81283_c0_g2_i2.p2	TRINITY_DN43758_c0_g1_i1.p1	TRINITY_DN55260_c1_g1_i1.p1	TRINITY_DN4369_c0_g1_i1.p1	TRINITY_DN6548_c2_g1_i2.p1	TRINITY_DN2708_c0_g1_i1.p1	TRINITY_DN8951_c0_g1_i1.p1		TRINITY_DN7860_c2_g1_i1.p1	TRINITY_DN515_c1_g1_i10.p1	TRINITY_DN1977_c0_g1_i12.p1	TRINITY_DN398_c0_g2_i9.p1	TRINITY_DN621_c0_g1_i1.p1	TRINITY_DN3979_c0_g1_i1.p1	TRINITY_DN21162_c0_g1_i5.p1	TRINITY_DN2187_c0_g1_i11.p1	TRINITY_DN4270_c0_g1_i1.p1	TRINITY_DN3024_c0_g1_i17.p1	TRINITY_DN16743_c0_g1_i1.p1	TRINITY_DN29185_c0_g1_i2.p1	TRINITY_DN91550_c1_g1_i1.p1	TRINITY_DN13331_c1_g1_i1.p1
118904at6656	FALSE	39	97.5	FBpp0079332	TRINITY_DN12353_c0_g1_i1.p1	TRINITY_DN5546_c0_g1_i1.p1	TRINITY_DN45471_c0_g1_i1.p1	c78617_g1_i2.p1	SMAR008336-PA	TRINITY_DN16756_c0_g1_i1.p1	TRINITY_DN67352_c0_g1_i1.p1	TRINITY_DN31113_c0_g1_i1.p1	TRINITY_DN1516_c0_g1_i1.p3	TRINITY_DN25732_c0_g1_i1.p1	TRINITY_DN42_c0_g1_i1.p2	TRINITY_DN5979_c0_g1_i1.p1	TRINITY_DN3071_c0_g1_i1.p1	TRINITY_DN9509_c0_g1_i1.p3	TRINITY_DN75073_c0_g1_i1.p1	TRINITY_DN12917_c0_g2_i1.p1	TRINITY_DN51524_c0_g1_i2.p1	TRINITY_DN86519_c0_g1_i2.p2	TRINITY_DN18613_c0_g1_i1.p1		TRINITY_DN279_c3_g1_i1.p1	TRINITY_DN6445_c0_g2_i2.p1	TRINITY_DN3007_c0_g1_i1.p1	TRINITY_DN434_c0_g1_i2.p3	TRINITY_DN61201_c0_g1_i2.p1	TRINITY_DN56295_c0_g1_i1.p1	TRINITY_DN5061_c0_g2_i1.p1	TRINITY_DN11172_c0_g1_i2.p1	TRINITY_DN29326_c0_g1_i1.p1	TRINITY_DN31599_c0_g1_i1.p1	TRINITY_DN9736_c0_g1_i4.p1	TRINITY_DN6758_c0_g1_i3.p1	TRINITY_DN526_c1_g1_i12.p2	TRINITY_DN3105_c0_g1_i1.p1	TRINITY_DN3455_c0_g1_i2.p1	TRINITY_DN27633_c0_g2_i1.p1	TRINITY_DN25406_c0_g1_i2.p1	TRINITY_DN16378_c0_g1_i1.p1	TRINITY_DN10614_c1_g1_i1.p1
124730at6656	FALSE	39	97.5	FBpp0081882	TRINITY_DN10160_c0_g1_i1.p1	TRINITY_DN57270_c0_g1_i1.p1	TRINITY_DN72424_c0_g1_i1.p1	c29509_g1_i1.p1	SMAR006145-PA	TRINITY_DN22970_c0_g1_i3.p1	TRINITY_DN11658_c0_g2_i1.p1	TRINITY_DN5588_c0_g1_i3.p1	TRINITY_DN1342_c0_g1_i1.p1	TRINITY_DN20814_c0_g1_i1.p1	TRINITY_DN2291_c0_g1_i1.p1	TRINITY_DN978_c0_g1_i2.p1	TRINITY_DN19046_c0_g1_i1.p2	TRINITY_DN30855_c0_g1_i1.p1	TRINITY_DN16112_c0_g1_i1.p1	TRINITY_DN31894_c4_g1_i1.p1	TRINITY_DN73020_c0_g1_i4.p1	TRINITY_DN81302_c0_g1_i3.p1	TRINITY_DN9143_c0_g2_i1.p1		TRINITY_DN46838_c0_g1_i1.p1	TRINITY_DN7913_c0_g1_i1.p1	TRINITY_DN1939_c0_g1_i2.p2	TRINITY_DN40540_c0_g1_i1.p1	TRINITY_DN13941_c0_g1_i2.p1	TRINITY_DN2411_c0_g1_i2.p1	TRINITY_DN34562_c0_g1_i1.p1	TRINITY_DN49394_c0_g1_i1.p1	TRINITY_DN1515_c0_g1_i4.p1	TRINITY_DN2745_c0_g1_i1.p1	TRINITY_DN1995_c0_g1_i1.p1	TRINITY_DN347_c0_g1_i12.p1	TRINITY_DN378_c0_g1_i1.p1	TRINITY_DN4228_c0_g1_i4.p1	TRINITY_DN266_c0_g1_i1.p1	TRINITY_DN3516_c0_g1_i1.p1	TRINITY_DN24314_c0_g1_i1.p1	TRINITY_DN78803_c0_g1_i1.p1	TRINITY_DN13693_c0_g1_i1.p1
81650at6656	TRUE	39	97.5	FBpp0082743	TRINITY_DN3259_c0_g1_i1.p1	TRINITY_DN25283_c0_g2_i1.p1	TRINITY_DN44680_c0_g1_i1.p1	c80713_g1_i1.p1	SMAR009200-PA	TRINITY_DN26581_c0_g2_i3.p1	TRINITY_DN36107_c0_g1_i1.p1	TRINITY_DN3160_c0_g1_i1.p1	TRINITY_DN537_c0_g1_i4.p1	TRINITY_DN2003_c0_g1_i1.p1	TRINITY_DN2933_c0_g1_i1.p1	TRINITY_DN34470_c0_g1_i1.p1	TRINITY_DN36248_c0_g1_i1.p1	TRINITY_DN117_c0_g1_i1.p1	TRINITY_DN92437_c0_g1_i1.p1	TRINITY_DN8381_c0_g1_i1.p1	TRINITY_DN73003_c0_g1_i1.p1	TRINITY_DN137022_c0_g1_i1.p1	TRINITY_DN6449_c0_g1_i1.p1		TRINITY_DN5237_c1_g1_i1.p1	TRINITY_DN2867_c0_g1_i1.p1	TRINITY_DN7274_c1_g1_i1.p1	TRINITY_DN197_c0_g1_i2.p1	TRINITY_DN72159_c0_g1_i1.p1	TRINITY_DN41731_c0_g1_i1.p2	TRINITY_DN8400_c0_g1_i3.p1	TRINITY_DN48428_c0_g1_i1.p1	TRINITY_DN1341_c0_g1_i1.p1	TRINITY_DN6608_c0_g1_i2.p1	TRINITY_DN27674_c0_g1_i1.p1	TRINITY_DN4383_c0_g1_i2.p1	TRINITY_DN280_c0_g1_i2.p1	TRINITY_DN7600_c0_g1_i2.p2	TRINITY_DN19805_c0_g1_i1.p1	TRINITY_DN19367_c0_g1_i1.p1	TRINITY_DN29690_c0_g1_i1.p1	TRINITY_DN79699_c0_g1_i1.p1	TRINITY_DN2310_c0_g1_i1.p1
93085at6656	TRUE	39	97.5	FBpp0074075	TRINITY_DN4521_c0_g1_i1.p1	TRINITY_DN23717_c0_g2_i1.p1	TRINITY_DN50235_c1_g2_i1.p2	c85038_g1_i1.p1	SMAR010146-PA	TRINITY_DN14242_c0_g4_i1.p1	TRINITY_DN31629_c0_g1_i1.p1	TRINITY_DN8289_c0_g1_i1.p1	TRINITY_DN5582_c0_g1_i1.p1	TRINITY_DN2246_c0_g1_i1.p1	TRINITY_DN21713_c0_g1_i1.p1	TRINITY_DN7721_c0_g1_i1.p1	TRINITY_DN36776_c0_g1_i1.p1	TRINITY_DN17704_c0_g1_i1.p1		TRINITY_DN20920_c0_g1_i1.p1	TRINITY_DN72662_c0_g1_i1.p1	TRINITY_DN83433_c0_g1_i1.p1	TRINITY_DN16615_c0_g1_i1.p1	TRINITY_DN75307_c0_g1_i1.p1	TRINITY_DN2322_c0_g1_i1.p1	TRINITY_DN13649_c0_g1_i1.p1	TRINITY_DN12005_c0_g1_i2.p2	TRINITY_DN1171_c0_g1_i1.p1	TRINITY_DN73440_c0_g1_i2.p1	TRINITY_DN52592_c0_g1_i1.p1	TRINITY_DN2315_c0_g1_i2.p1	TRINITY_DN4075_c0_g1_i1.p1	TRINITY_DN1470_c0_g3_i2.p1	TRINITY_DN2494_c0_g1_i1.p1	TRINITY_DN2331_c0_g1_i1.p1	TRINITY_DN2530_c0_g1_i4.p1	TRINITY_DN4158_c0_g1_i1.p2	TRINITY_DN1523_c0_g1_i1.p1	TRINITY_DN26649_c0_g1_i1.p1	TRINITY_DN40699_c0_g1_i1.p1	TRINITY_DN29338_c0_g1_i1.p1	TRINITY_DN86561_c1_g1_i2.p1	TRINITY_DN11398_c0_g1_i1.p1
93535at6656	TRUE	39	97.5	FBpp0076738	TRINITY_DN66812_c0_g1_i1.p1	TRINITY_DN32133_c0_g1_i1.p2	TRINITY_DN37688_c0_g1_i1.p1	c95054_g1_i1.p1	SMAR000105-PA	TRINITY_DN54667_c0_g2_i1.p1	TRINITY_DN68879_c0_g1_i1.p1	TRINITY_DN1708_c0_g1_i2.p2	TRINITY_DN2340_c0_g1_i4.p2	TRINITY_DN5681_c0_g1_i1.p1	TRINITY_DN239_c0_g1_i1.p1	TRINITY_DN12546_c0_g1_i1.p1	TRINITY_DN3048_c0_g1_i6.p1	TRINITY_DN3965_c0_g1_i4.p1	TRINITY_DN12724_c0_g1_i1.p1	TRINITY_DN7299_c0_g1_i1.p1		TRINITY_DN71387_c0_g1_i1.p1	TRINITY_DN36097_c0_g1_i1.p1	TRINITY_DN2790_c0_g1_i1.p1	TRINITY_DN1296_c0_g1_i1.p1	TRINITY_DN40722_c0_g1_i1.p1	TRINITY_DN14598_c0_g1_i1.p1	TRINITY_DN2892_c0_g1_i2.p2	TRINITY_DN2488_c0_g1_i1.p1	TRINITY_DN2012_c0_g1_i4.p1	TRINITY_DN1605_c0_g1_i1.p1	TRINITY_DN9279_c0_g1_i1.p1	TRINITY_DN14761_c0_g1_i5.p1	TRINITY_DN14047_c0_g1_i1.p2	TRINITY_DN4073_c0_g1_i2.p2	TRINITY_DN2272_c0_g1_i4.p1	TRINITY_DN22679_c0_g1_i1.p1	TRINITY_DN3019_c0_g2_i1.p1	TRINITY_DN2685_c0_g1_i1.p1	TRINITY_DN23712_c0_g2_i1.p1	TRINITY_DN28778_c0_g1_i2.p1	TRINITY_DN90998_c0_g9_i1.p1	TRINITY_DN2323_c0_g1_i1.p1
104769at6656	TRUE	39	97.5	FBpp0112122	TRINITY_DN15650_c0_g2_i1.p1	TRINITY_DN21633_c0_g1_i1.p1	TRINITY_DN45382_c0_g1_i1.p1	c99583_g1_i2.p1	SMAR013846-PA	TRINITY_DN22219_c0_g1_i1.p1	TRINITY_DN40396_c3_g1_i1.p1	TRINITY_DN11479_c0_g1_i1.p1	TRINITY_DN4246_c0_g1_i8.p1	TRINITY_DN22108_c0_g1_i3.p1	TRINITY_DN195_c0_g2_i1.p1	TRINITY_DN1338_c0_g1_i2.p1	TRINITY_DN24044_c0_g1_i1.p1	TRINITY_DN3799_c0_g1_i2.p1	TRINITY_DN15516_c0_g1_i1.p1	TRINITY_DN27365_c0_g1_i2.p1	TRINITY_DN70107_c0_g1_i3.p1	TRINITY_DN82061_c1_g3_i5.p1	TRINITY_DN38746_c0_g2_i1.p1		TRINITY_DN3536_c0_g1_i2.p1	TRINITY_DN2541_c0_g1_i4.p1	TRINITY_DN13581_c0_g1_i1.p1	TRINITY_DN27985_c0_g1_i1.p1	TRINITY_DN32834_c0_g1_i1.p1	TRINITY_DN4661_c0_g1_i1.p1	TRINITY_DN3790_c0_g1_i4.p1	TRINITY_DN6922_c0_g1_i1.p1	TRINITY_DN11106_c0_g1_i1.p1	TRINITY_DN33920_c0_g1_i3.p1	TRINITY_DN2127_c1_g1_i1.p1	TRINITY_DN12110_c0_g1_i1.p1	TRINITY_DN91_c1_g1_i2.p1	TRINITY_DN1323_c0_g1_i3.p1	TRINITY_DN14148_c0_g1_i1.p1	TRINITY_DN7774_c0_g1_i1.p1	TRINITY_DN27885_c0_g1_i2.p1	TRINITY_DN87252_c0_g1_i2.p1	TRINITY_DN2037_c0_g1_i1.p1
106788at6656	TRUE	39	97.5	FBpp0076000	TRINITY_DN15149_c0_g3_i1.p1	TRINITY_DN24801_c0_g2_i1.p2	TRINITY_DN47768_c0_g1_i1.p1	c88804_g1_i2.p1	SMAR014880-PA	TRINITY_DN21492_c0_g1_i1.p1	TRINITY_DN40752_c0_g2_i1.p1	TRINITY_DN3249_c0_g1_i1.p1	TRINITY_DN2379_c0_g1_i3.p1	TRINITY_DN1397_c0_g1_i2.p1	TRINITY_DN22341_c0_g1_i1.p1	TRINITY_DN22124_c0_g1_i1.p1	TRINITY_DN29145_c0_g1_i1.p1	TRINITY_DN3535_c0_g1_i5.p1	TRINITY_DN4036_c0_g1_i1.p1	TRINITY_DN33800_c3_g1_i1.p1	TRINITY_DN114337_c0_g1_i1.p1	TRINITY_DN76372_c0_g1_i1.p1	TRINITY_DN88605_c0_g1_i1.p1		TRINITY_DN13507_c0_g1_i3.p2	TRINITY_DN33719_c0_g1_i1.p1	TRINITY_DN14668_c0_g1_i1.p1	TRINITY_DN3263_c0_g1_i5.p1	TRINITY_DN21782_c0_g1_i1.p1	TRINITY_DN2915_c0_g1_i1.p1	TRINITY_DN26380_c0_g1_i1.p1	TRINITY_DN9882_c0_g1_i7.p1	TRINITY_DN24996_c0_g1_i1.p1	TRINITY_DN1327_c0_g1_i11.p1	TRINITY_DN1417_c0_g1_i2.p1	TRINITY_DN1833_c0_g1_i1.p1	TRINITY_DN26371_c0_g1_i1.p1	TRINITY_DN8549_c0_g1_i1.p1	TRINITY_DN17820_c0_g1_i1.p1	TRINITY_DN2975_c0_g1_i1.p1	TRINITY_DN26569_c0_g1_i12.p1	TRINITY_DN89419_c0_g6_i3.p1	TRINITY_DN2429_c0_g1_i1.p1
133015at6656	FALSE	38	95	FBpp0076172	TRINITY_DN1637_c0_g1_i1.p1	TRINITY_DN27327_c0_g1_i1.p1	TRINITY_DN44226_c0_g1_i2.p1	c92989_g1_i1.p1	SMAR013246-PA	TRINITY_DN22553_c0_g1_i3.p1	TRINITY_DN132428_c0_g1_i1.p1	TRINITY_DN182_c0_g1_i1.p1	TRINITY_DN809_c0_g1_i11.p2	TRINITY_DN7519_c0_g1_i1.p1	TRINITY_DN3769_c0_g1_i1.p1	TRINITY_DN2192_c0_g1_i1.p1	TRINITY_DN23713_c0_g1_i1.p1	TRINITY_DN26198_c0_g1_i1.p1	TRINITY_DN2308_c0_g1_i1.p1	TRINITY_DN30793_c1_g2_i4.p2	TRINITY_DN42762_c0_g1_i1.p1	TRINITY_DN68094_c0_g1_i2.p1			TRINITY_DN32592_c0_g1_i1.p1	TRINITY_DN11149_c0_g2_i1.p1	TRINITY_DN5167_c0_g2_i1.p1	TRINITY_DN1798_c0_g1_i5.p1	TRINITY_DN53554_c0_g1_i1.p1	TRINITY_DN22444_c0_g1_i1.p1	TRINITY_DN1707_c0_g1_i15.p2	TRINITY_DN55408_c0_g1_i1.p1	TRINITY_DN682_c0_g1_i3.p1	TRINITY_DN3022_c0_g1_i10.p1	TRINITY_DN33456_c0_g1_i1.p1	TRINITY_DN1722_c0_g1_i1.p1	TRINITY_DN4200_c0_g1_i2.p1	TRINITY_DN3513_c0_g1_i3.p1	TRINITY_DN2083_c0_g1_i1.p2	TRINITY_DN24097_c0_g1_i2.p1	TRINITY_DN29778_c0_g3_i10.p1	TRINITY_DN170775_c0_g1_i1.p1	TRINITY_DN8947_c0_g1_i1.p1
135391at6656	FALSE	38	95	FBpp0079586	TRINITY_DN68440_c0_g1_i1.p1	TRINITY_DN20102_c0_g1_i1.p1	TRINITY_DN52784_c2_g3_i4.p4	c11413_g1_i1.p1	SMAR014823-PA	TRINITY_DN20610_c0_g1_i1.p2	TRINITY_DN121943_c0_g1_i1.p1	TRINITY_DN770_c1_g1_i9.p1	TRINITY_DN544_c0_g1_i7.p2	TRINITY_DN25350_c0_g1_i1.p1	TRINITY_DN12647_c0_g1_i1.p1	TRINITY_DN662_c0_g1_i1.p3	TRINITY_DN22924_c0_g1_i1.p1	TRINITY_DN9752_c0_g1_i3.p1	TRINITY_DN31708_c0_g2_i1.p1	TRINITY_DN25537_c0_g3_i1.p1	TRINITY_DN67165_c0_g1_i1.p1	TRINITY_DN79089_c0_g1_i1.p1			TRINITY_DN1243_c0_g1_i10.p1	TRINITY_DN45815_c0_g1_i1.p1	TRINITY_DN615_c0_g1_i2.p1	TRINITY_DN913_c0_g1_i1.p2	TRINITY_DN49439_c0_g1_i1.p1	TRINITY_DN51529_c0_g1_i2.p1	TRINITY_DN4608_c1_g1_i4.p1	TRINITY_DN2187_c0_g3_i2.p1	TRINITY_DN1356_c0_g3_i1.p1	TRINITY_DN4654_c1_g1_i1.p1	TRINITY_DN823_c1_g1_i1.p1	TRINITY_DN64362_c0_g1_i1.p1	TRINITY_DN4758_c0_g3_i1.p4	TRINITY_DN736_c0_g1_i13.p2	TRINITY_DN3997_c0_g1_i2.p1	TRINITY_DN10245_c0_g2_i1.p1	TRINITY_DN30163_c0_g1_i1.p1	TRINITY_DN92553_c3_g1_i1.p1	TRINITY_DN10317_c0_g1_i1.p1
108162at6656	TRUE	39	97.5	FBpp0071587	TRINITY_DN56944_c0_g1_i1.p1	TRINITY_DN35108_c0_g1_i1.p1	TRINITY_DN46797_c0_g1_i1.p1	c70095_g1_i1.p1	SMAR003364-PA	TRINITY_DN22001_c0_g3_i4.p1	TRINITY_DN17988_c0_g1_i1.p1	TRINITY_DN2529_c0_g1_i1.p1	TRINITY_DN2674_c0_g1_i1.p1	TRINITY_DN6348_c0_g1_i2.p1	TRINITY_DN9272_c0_g1_i1.p1	TRINITY_DN16193_c0_g1_i1.p1	TRINITY_DN52258_c0_g1_i1.p1	TRINITY_DN2349_c0_g1_i2.p1	TRINITY_DN26871_c0_g1_i1.p1	TRINITY_DN17784_c1_g1_i1.p1	TRINITY_DN73051_c0_g1_i1.p1	TRINITY_DN76464_c0_g1_i1.p1		TRINITY_DN83809_c0_g1_i1.p1	TRINITY_DN1422_c1_g1_i1.p1	TRINITY_DN45385_c0_g1_i1.p1	TRINITY_DN413_c0_g1_i1.p1	TRINITY_DN3211_c0_g1_i1.p1	TRINITY_DN31_c0_g3_i1.p1	TRINITY_DN8374_c2_g1_i3.p1	TRINITY_DN35830_c0_g1_i1.p1	TRINITY_DN1456_c0_g1_i1.p1	TRINITY_DN3866_c0_g1_i1.p1	TRINITY_DN4147_c0_g1_i1.p1	TRINITY_DN31842_c0_g1_i1.p1	TRINITY_DN1227_c0_g1_i1.p1	TRINITY_DN1966_c0_g1_i1.p1	TRINITY_DN3952_c0_g1_i2.p1	TRINITY_DN287_c0_g1_i1.p1	TRINITY_DN8794_c0_g1_i1.p1	TRINITY_DN19996_c0_g1_i1.p1	TRINITY_DN65430_c0_g1_i2.p1	TRINITY_DN13231_c18_g1_i1.p1
112634at6656	TRUE	39	97.5	FBpp0087332	TRINITY_DN718_c0_g1_i1.p1	TRINITY_DN25056_c0_g1_i1.p1	TRINITY_DN49466_c0_g3_i1.p1	c53705_g1_i1.p1	SMAR000121-PA	TRINITY_DN20360_c0_g1_i2.p1	TRINITY_DN56742_c0_g1_i1.p1	TRINITY_DN10145_c1_g1_i1.p1	TRINITY_DN6895_c0_g1_i3.p1	TRINITY_DN7311_c0_g1_i2.p1	TRINITY_DN8822_c0_g1_i1.p1	TRINITY_DN3250_c0_g1_i3.p1	TRINITY_DN8234_c0_g1_i3.p1	TRINITY_DN27894_c0_g1_i1.p1	TRINITY_DN22822_c0_g1_i1.p1	TRINITY_DN22874_c0_g1_i1.p1	TRINITY_DN50895_c0_g1_i1.p1	TRINITY_DN131943_c0_g1_i1.p1		TRINITY_DN67576_c0_g1_i1.p1	TRINITY_DN10814_c0_g2_i1.p1	TRINITY_DN6399_c0_g1_i17.p1	TRINITY_DN6643_c0_g1_i1.p1	TRINITY_DN5161_c1_g1_i1.p1	TRINITY_DN10801_c0_g1_i3.p1	TRINITY_DN3874_c0_g1_i1.p1	TRINITY_DN8545_c0_g1_i5.p1	TRINITY_DN11140_c0_g1_i2.p1	TRINITY_DN9171_c0_g1_i1.p1	TRINITY_DN6507_c0_g1_i1.p1	TRINITY_DN13759_c1_g1_i1.p1	TRINITY_DN7852_c0_g2_i1.p1	TRINITY_DN1432_c0_g1_i1.p1	TRINITY_DN7055_c0_g1_i14.p1	TRINITY_DN6424_c0_g2_i1.p1	TRINITY_DN16981_c0_g1_i1.p1	TRINITY_DN29863_c0_g12_i3.p1	TRINITY_DN12633_c0_g2_i1.p1	TRINITY_DN16313_c0_g1_i1.p1
138553at6656	FALSE	39	97.5	FBpp0073806	TRINITY_DN14492_c0_g1_i1.p1	TRINITY_DN52325_c0_g1_i1.p1	TRINITY_DN48175_c0_g1_i2.p1	c184482_g1_i1.p1	SMAR007829-PA	TRINITY_DN19150_c0_g1_i2.p1	TRINITY_DN657_c0_g1_i1.p1	TRINITY_DN33881_c0_g1_i2.p1	TRINITY_DN5921_c1_g1_i2.p3	TRINITY_DN1899_c0_g1_i1.p1	TRINITY_DN13461_c0_g1_i1.p1	TRINITY_DN18511_c0_g1_i1.p1	TRINITY_DN23855_c0_g1_i2.p1	TRINITY_DN1832_c0_g1_i10.p4	TRINITY_DN38178_c0_g1_i1.p1	TRINITY_DN25654_c2_g1_i1.p2	TRINITY_DN65938_c0_g1_i1.p1	TRINITY_DN61764_c0_g1_i2.p1		TRINITY_DN53072_c0_g1_i1.p1	TRINITY_DN4804_c0_g1_i1.p1	TRINITY_DN2674_c0_g1_i1.p1	TRINITY_DN2418_c0_g1_i1.p1	TRINITY_DN11139_c0_g1_i1.p1	TRINITY_DN655_c0_g1_i2.p1	TRINITY_DN7627_c0_g1_i1.p1	TRINITY_DN2923_c0_g1_i2.p1	TRINITY_DN11816_c0_g1_i2.p1	TRINITY_DN13456_c1_g1_i1.p2	TRINITY_DN7716_c0_g1_i1.p1	TRINITY_DN2632_c0_g1_i1.p1	TRINITY_DN1235_c0_g3_i2.p1	TRINITY_DN3301_c0_g2_i8.p1	TRINITY_DN7480_c0_g1_i1.p1	TRINITY_DN24485_c0_g1_i1.p1	TRINITY_DN24275_c0_g3_i1.p1	TRINITY_DN28146_c2_g1_i1.p1	TRINITY_DN89445_c3_g1_i1.p1	TRINITY_DN1825_c0_g1_i1.p1
115229at6656	TRUE	39	97.5	FBpp0083959	TRINITY_DN15990_c0_g1_i1.p1	TRINITY_DN10206_c0_g1_i1.p1	TRINITY_DN50613_c0_g1_i1.p3	c75015_g1_i1.p1	SMAR011435-PA	TRINITY_DN19904_c0_g2_i2.p1	TRINITY_DN27231_c0_g2_i1.p1	TRINITY_DN16524_c0_g1_i1.p3	TRINITY_DN2133_c0_g3_i3.p2	TRINITY_DN18335_c0_g1_i2.p1	TRINITY_DN52_c0_g1_i1.p1	TRINITY_DN273_c0_g1_i1.p1	TRINITY_DN19451_c0_g1_i1.p2	TRINITY_DN1742_c2_g1_i1.p1	TRINITY_DN66634_c0_g1_i1.p1	TRINITY_DN24142_c0_g1_i1.p1	TRINITY_DN61750_c0_g1_i1.p1	TRINITY_DN62773_c0_g3_i1.p1	TRINITY_DN5392_c0_g1_i1.p1		TRINITY_DN38154_c0_g1_i1.p1	TRINITY_DN31032_c0_g1_i1.p1	TRINITY_DN3660_c0_g1_i1.p1	TRINITY_DN4631_c0_g1_i1.p1	TRINITY_DN2999_c0_g1_i2.p1	TRINITY_DN4513_c0_g1_i2.p1	TRINITY_DN726_c0_g1_i6.p2	TRINITY_DN2997_c0_g1_i1.p1	TRINITY_DN90_c4_g2_i1.p1	TRINITY_DN1871_c0_g2_i1.p1	TRINITY_DN9926_c0_g2_i1.p1	TRINITY_DN2538_c0_g2_i1.p1	TRINITY_DN2198_c0_g1_i3.p2	TRINITY_DN5540_c0_g1_i3.p1	TRINITY_DN3151_c0_g1_i1.p1	TRINITY_DN23172_c0_g1_i1.p1	TRINITY_DN39975_c0_g1_i1.p1	TRINITY_DN77596_c0_g1_i1.p1	TRINITY_DN14450_c0_g1_i1.p2
118014at6656	TRUE	39	97.5	FBpp0086795	TRINITY_DN11823_c0_g1_i2.p1	TRINITY_DN7937_c0_g1_i1.p1	TRINITY_DN46428_c1_g1_i3.p1	c97444_g1_i1.p1	SMAR006442-PA	TRINITY_DN24528_c0_g1_i1.p1	TRINITY_DN32321_c0_g1_i1.p1	TRINITY_DN10910_c0_g1_i1.p1	TRINITY_DN26424_c0_g1_i1.p1	TRINITY_DN2599_c0_g1_i3.p1	TRINITY_DN1124_c0_g1_i2.p1	TRINITY_DN13136_c0_g1_i1.p1	TRINITY_DN3724_c0_g1_i1.p1	TRINITY_DN26286_c0_g1_i1.p1		TRINITY_DN27956_c0_g1_i1.p1	TRINITY_DN64790_c0_g1_i1.p1	TRINITY_DN82185_c0_g1_i1.p1	TRINITY_DN54392_c0_g1_i1.p1	TRINITY_DN78382_c0_g1_i1.p1	TRINITY_DN1063_c1_g2_i1.p1	TRINITY_DN48713_c0_g1_i1.p1	TRINITY_DN3828_c0_g1_i1.p1	TRINITY_DN28812_c0_g1_i1.p1	TRINITY_DN3442_c0_g1_i2.p1	TRINITY_DN62102_c0_g1_i1.p1	TRINITY_DN5898_c0_g1_i4.p1	TRINITY_DN5085_c0_g1_i6.p1	TRINITY_DN4061_c0_g1_i1.p1	TRINITY_DN32157_c0_g1_i1.p1	TRINITY_DN2569_c0_g1_i1.p1	TRINITY_DN4540_c0_g1_i1.p1	TRINITY_DN652_c0_g1_i1.p3	TRINITY_DN4713_c0_g1_i5.p1	TRINITY_DN5044_c0_g1_i1.p1	TRINITY_DN21344_c0_g1_i1.p1	TRINITY_DN27178_c0_g2_i1.p1	TRINITY_DN14820_c0_g1_i1.p1	TRINITY_DN7957_c0_g1_i1.p1
125414at6656	TRUE	39	97.5	FBpp0079470	TRINITY_DN30196_c0_g1_i1.p1	TRINITY_DN30457_c0_g1_i1.p3	TRINITY_DN51938_c0_g2_i1.p2	c73156_g1_i1.p1	SMAR005681-PA	TRINITY_DN23836_c0_g1_i1.p1	TRINITY_DN126473_c0_g1_i1.p1	TRINITY_DN6266_c0_g1_i1.p1	TRINITY_DN3876_c0_g1_i13.p2		TRINITY_DN27585_c0_g1_i1.p1	TRINITY_DN8093_c0_g1_i1.p1	TRINITY_DN1643_c0_g1_i1.p1	TRINITY_DN1907_c0_g1_i5.p1	TRINITY_DN23062_c0_g1_i1.p1	TRINITY_DN24121_c2_g2_i2.p1	TRINITY_DN67978_c0_g1_i2.p1	TRINITY_DN85934_c2_g1_i3.p1	TRINITY_DN42651_c0_g1_i1.p1	TRINITY_DN74962_c0_g1_i1.p1	TRINITY_DN645_c3_g1_i2.p1	TRINITY_DN1331_c0_g1_i3.p1	TRINITY_DN3595_c0_g1_i2.p1	TRINITY_DN5893_c0_g1_i3.p1	TRINITY_DN8976_c0_g1_i2.p1	TRINITY_DN2916_c0_g1_i6.p1	TRINITY_DN6461_c0_g1_i10.p1	TRINITY_DN3951_c0_g1_i8.p1	TRINITY_DN1304_c0_g1_i4.p1	TRINITY_DN490_c0_g1_i1.p1	TRINITY_DN11481_c0_g1_i1.p1	TRINITY_DN905_c0_g1_i1.p1	TRINITY_DN1448_c0_g2_i5.p1	TRINITY_DN19581_c0_g1_i1.p1	TRINITY_DN4633_c0_g1_i1.p1	TRINITY_DN14849_c0_g1_i1.p1	TRINITY_DN25452_c0_g1_i1.p1	TRINITY_DN79914_c0_g1_i1.p1	TRINITY_DN8903_c0_g1_i1.p2
145610at6656	FALSE	39	97.5	FBpp0303170	TRINITY_DN17870_c0_g1_i2.p1	TRINITY_DN20255_c0_g1_i1.p1	TRINITY_DN47905_c0_g3_i1.p1	c55955_g1_i1.p1	SMAR009529-PA	TRINITY_DN16684_c1_g4_i1.p1	TRINITY_DN37213_c0_g1_i3.p1	TRINITY_DN5147_c0_g1_i3.p1	TRINITY_DN1106_c0_g1_i2.p1	TRINITY_DN1017_c0_g2_i2.p1	TRINITY_DN948_c0_g1_i2.p1	TRINITY_DN1168_c0_g1_i3.p2	TRINITY_DN3395_c0_g1_i2.p1	TRINITY_DN2185_c0_g1_i1.p1	TRINITY_DN31992_c0_g1_i2.p1	TRINITY_DN27750_c2_g2_i1.p2	TRINITY_DN70460_c0_g1_i2.p2	TRINITY_DN78926_c0_g1_i1.p1		TRINITY_DN60571_c0_g1_i1.p1	TRINITY_DN14653_c0_g1_i1.p1	TRINITY_DN1404_c0_g1_i1.p2	TRINITY_DN1941_c0_g1_i1.p1	TRINITY_DN3552_c0_g1_i1.p2	TRINITY_DN36294_c0_g1_i1.p1	TRINITY_DN1621_c0_g1_i6.p1	TRINITY_DN1181_c0_g1_i1.p1	TRINITY_DN11925_c0_g1_i1.p1	TRINITY_DN12096_c0_g1_i6.p3	TRINITY_DN3900_c1_g1_i1.p1	TRINITY_DN733_c0_g1_i2.p1	TRINITY_DN2651_c0_g1_i10.p1	TRINITY_DN481_c0_g1_i1.p2	TRINITY_DN3969_c0_g1_i2.p2	TRINITY_DN9306_c0_g1_i1.p1	TRINITY_DN2299_c0_g1_i1.p1	TRINITY_DN25392_c0_g3_i1.p1	TRINITY_DN40128_c0_g2_i1.p1	TRINITY_DN13384_c16_g1_i1.p1
147657at6656	FALSE	39	97.5	FBpp0075358	TRINITY_DN19204_c1_g1_i3.p4	TRINITY_DN27824_c0_g1_i2.p2	TRINITY_DN45851_c0_g1_i2.p2	c99570_g1_i1.p1	SMAR013812-PA	TRINITY_DN23297_c0_g1_i1.p1	TRINITY_DN13336_c1_g1_i1.p1	TRINITY_DN4658_c0_g1_i1.p1	TRINITY_DN491_c0_g1_i25.p2	TRINITY_DN7490_c0_g1_i1.p1	TRINITY_DN1737_c0_g1_i1.p2	TRINITY_DN2143_c0_g1_i1.p1	TRINITY_DN2186_c0_g1_i3.p1	TRINITY_DN13029_c0_g1_i1.p1		TRINITY_DN32869_c2_g6_i3.p5	TRINITY_DN62909_c0_g4_i1.p1	TRINITY_DN84310_c0_g1_i2.p1	TRINITY_DN43213_c0_g1_i2.p1	TRINITY_DN41311_c1_g1_i1.p1	TRINITY_DN8096_c0_g1_i3.p1	TRINITY_DN9064_c0_g1_i1.p1	TRINITY_DN3923_c0_g1_i1.p1	TRINITY_DN899_c0_g1_i7.p2	TRINITY_DN3303_c0_g2_i2.p2	TRINITY_DN7707_c0_g1_i6.p1	TRINITY_DN1289_c1_g1_i3.p2	TRINITY_DN3303_c0_g1_i10.p1	TRINITY_DN1525_c0_g1_i1.p2	TRINITY_DN4979_c0_g1_i3.p2	TRINITY_DN3083_c0_g1_i2.p2	TRINITY_DN3246_c0_g1_i12.p1	TRINITY_DN1301_c2_g1_i2.p2	TRINITY_DN3823_c0_g1_i3.p1	TRINITY_DN3888_c0_g1_i1.p1	TRINITY_DN22094_c0_g1_i1.p1	TRINITY_DN16203_c0_g1_i1.p1	TRINITY_DN40147_c0_g2_i1.p1	TRINITY_DN13224_c5_g1_i1.p2
127511at6656	TRUE	39	97.5	FBpp0078831	TRINITY_DN10223_c0_g1_i1.p1	TRINITY_DN23251_c0_g1_i1.p2	TRINITY_DN102838_c0_g1_i1.p1	c46371_g1_i1.p1	SMAR005473-PA	TRINITY_DN21168_c0_g2_i1.p1	TRINITY_DN32223_c0_g1_i1.p1	TRINITY_DN30909_c0_g1_i1.p1	TRINITY_DN4209_c0_g1_i2.p1	TRINITY_DN16786_c0_g1_i1.p1	TRINITY_DN21818_c0_g1_i1.p1	TRINITY_DN671_c0_g1_i1.p2	TRINITY_DN11846_c0_g1_i1.p1	TRINITY_DN26545_c0_g1_i1.p1	TRINITY_DN29041_c0_g1_i1.p1	TRINITY_DN32078_c0_g1_i2.p3	TRINITY_DN67632_c0_g1_i1.p1	TRINITY_DN66987_c0_g2_i1.p1		TRINITY_DN8005_c0_g1_i1.p2	TRINITY_DN47952_c0_g1_i1.p1	TRINITY_DN458_c18_g1_i1.p1	TRINITY_DN1687_c0_g1_i1.p1	TRINITY_DN1921_c0_g1_i2.p2	TRINITY_DN539_c0_g1_i1.p1	TRINITY_DN3380_c0_g1_i1.p1	TRINITY_DN1154_c0_g1_i1.p1	TRINITY_DN3356_c0_g1_i1.p1	TRINITY_DN10090_c2_g1_i2.p2	TRINITY_DN10841_c0_g1_i1.p1	TRINITY_DN4105_c0_g1_i5.p2	TRINITY_DN773_c0_g1_i11.p1	TRINITY_DN14959_c0_g1_i1.p1	TRINITY_DN2822_c0_g1_i1.p1	TRINITY_DN15084_c0_g1_i1.p1	TRINITY_DN44155_c0_g1_i1.p1	TRINITY_DN16141_c0_g1_i2.p1	TRINITY_DN77893_c0_g1_i1.p1	TRINITY_DN12035_c0_g1_i1.p1
130126at6656	TRUE	39	97.5	FBpp0071259	TRINITY_DN41570_c0_g1_i1.p1	TRINITY_DN26965_c0_g2_i2.p2	TRINITY_DN49330_c0_g1_i1.p3	c94091_g2_i3.p1	SMAR006739-PA	TRINITY_DN27387_c0_g1_i1.p1	TRINITY_DN28552_c0_g1_i3.p1	TRINITY_DN260_c0_g1_i2.p1	TRINITY_DN5291_c0_g1_i1.p1	TRINITY_DN25343_c0_g1_i1.p1	TRINITY_DN28424_c0_g1_i1.p1	TRINITY_DN5172_c0_g2_i1.p1	TRINITY_DN1174_c0_g1_i1.p1	TRINITY_DN5349_c0_g1_i1.p1	TRINITY_DN61890_c0_g1_i1.p1	TRINITY_DN30158_c1_g2_i4.p2	TRINITY_DN54159_c0_g1_i1.p1	TRINITY_DN75702_c0_g1_i1.p1	TRINITY_DN39189_c0_g1_i1.p1		TRINITY_DN3401_c1_g1_i1.p1	TRINITY_DN38902_c0_g1_i1.p1	TRINITY_DN19969_c0_g1_i1.p1	TRINITY_DN3264_c0_g1_i1.p2	TRINITY_DN62110_c0_g1_i1.p1	TRINITY_DN10356_c1_g2_i2.p1	TRINITY_DN1947_c0_g1_i1.p1	TRINITY_DN41665_c0_g1_i1.p1	TRINITY_DN222_c1_g1_i2.p1	TRINITY_DN14128_c0_g1_i1.p1	TRINITY_DN14143_c0_g1_i1.p2	TRINITY_DN2201_c0_g1_i11.p2	TRINITY_DN911_c0_g1_i1.p2	TRINITY_DN8081_c0_g1_i1.p1	TRINITY_DN13612_c0_g1_i1.p1	TRINITY_DN16263_c0_g1_i2.p1	TRINITY_DN25171_c0_g2_i2.p1	TRINITY_DN74636_c0_g1_i1.p1	TRINITY_DN16232_c0_g1_i1.p1
149126at6656	FALSE	39	97.5	FBpp0084135	TRINITY_DN18884_c0_g2_i3.p1	TRINITY_DN9457_c0_g1_i1.p1	TRINITY_DN53160_c2_g1_i1.p2	c75516_g1_i1.p1	SMAR004963-PA	TRINITY_DN28762_c0_g8_i9.p1	TRINITY_DN34205_c0_g2_i1.p1	TRINITY_DN566_c0_g1_i1.p1	TRINITY_DN5730_c0_g1_i1.p1	TRINITY_DN26_c0_g1_i4.p1	TRINITY_DN29353_c0_g1_i1.p1	TRINITY_DN5025_c0_g1_i3.p1	TRINITY_DN2870_c0_g1_i2.p1	TRINITY_DN3707_c2_g1_i1.p1	TRINITY_DN32155_c0_g1_i1.p1	TRINITY_DN29918_c1_g2_i2.p1	TRINITY_DN73026_c7_g7_i1.p1		TRINITY_DN4971_c0_g1_i1.p1	TRINITY_DN45144_c0_g1_i1.p1	TRINITY_DN4829_c0_g4_i1.p1	TRINITY_DN7620_c0_g1_i1.p1	TRINITY_DN4556_c0_g1_i1.p1	TRINITY_DN586_c0_g1_i2.p1	TRINITY_DN63331_c0_g1_i1.p1	TRINITY_DN51876_c0_g1_i1.p1	TRINITY_DN6600_c0_g1_i8.p1	TRINITY_DN1000_c0_g1_i3.p1	TRINITY_DN3024_c0_g1_i2.p1	TRINITY_DN2679_c0_g1_i3.p1	TRINITY_DN33626_c0_g1_i1.p1	TRINITY_DN64158_c0_g1_i1.p1	TRINITY_DN811_c0_g1_i10.p4	TRINITY_DN3235_c0_g1_i8.p1	TRINITY_DN22145_c0_g1_i1.p1	TRINITY_DN18942_c0_g1_i1.p1	TRINITY_DN18754_c0_g1_i1.p1	TRINITY_DN90802_c0_g1_i1.p1	TRINITY_DN12108_c1_g1_i1.p1
135828at6656	TRUE	39	97.5	FBpp0076859	TRINITY_DN16793_c0_g1_i3.p1	TRINITY_DN32268_c6_g1_i1.p1	TRINITY_DN49574_c0_g1_i2.p2	c135080_g1_i1.p1	SMAR014236-PA	TRINITY_DN25506_c0_g3_i1.p1	TRINITY_DN29633_c0_g1_i1.p1	TRINITY_DN19222_c0_g1_i1.p1	TRINITY_DN3517_c0_g1_i1.p1	TRINITY_DN929_c0_g1_i1.p1	TRINITY_DN33852_c0_g1_i1.p1	TRINITY_DN595_c2_g1_i1.p1		TRINITY_DN18474_c0_g1_i1.p1	TRINITY_DN88020_c0_g1_i1.p1	TRINITY_DN24471_c0_g1_i1.p1	TRINITY_DN55609_c0_g1_i1.p1	TRINITY_DN85696_c4_g1_i1.p1	TRINITY_DN43472_c0_g1_i1.p1	TRINITY_DN78048_c0_g1_i1.p1	TRINITY_DN2121_c0_g1_i2.p1	TRINITY_DN24656_c0_g1_i1.p1	TRINITY_DN18627_c0_g1_i1.p1	TRINITY_DN1675_c1_g1_i2.p1	TRINITY_DN6949_c0_g1_i1.p1	TRINITY_DN1044_c0_g1_i1.p1	TRINITY_DN3055_c0_g2_i1.p1	TRINITY_DN5332_c0_g1_i16.p1	TRINITY_DN2107_c0_g1_i1.p3	TRINITY_DN780_c0_g1_i1.p1	TRINITY_DN4588_c0_g1_i1.p1	TRINITY_DN4696_c0_g2_i2.p1	TRINITY_DN1078_c0_g1_i20.p6	TRINITY_DN1383_c0_g1_i1.p1	TRINITY_DN2702_c0_g1_i5.p1	TRINITY_DN9339_c0_g1_i1.p1	TRINITY_DN5535_c0_g1_i1.p1	TRINITY_DN89966_c3_g4_i1.p1	TRINITY_DN13409_c18_g1_i1.p1
151658at6656	FALSE	39	97.5	FBpp0070650	TRINITY_DN67632_c0_g1_i1.p1	TRINITY_DN19834_c0_g1_i1.p1	TRINITY_DN45899_c0_g1_i1.p1	c99643_g1_i1.p2	SMAR008132-PA	TRINITY_DN23944_c0_g2_i1.p1	TRINITY_DN34086_c0_g1_i1.p1	TRINITY_DN8000_c0_g1_i1.p1	TRINITY_DN2301_c0_g1_i1.p1	TRINITY_DN1263_c0_g1_i1.p1	TRINITY_DN1517_c0_g1_i1.p1	TRINITY_DN3717_c0_g1_i1.p1	TRINITY_DN6950_c0_g1_i1.p1	TRINITY_DN6138_c0_g1_i2.p1	TRINITY_DN13622_c0_g1_i1.p1	TRINITY_DN20114_c0_g1_i1.p1	TRINITY_DN66093_c0_g1_i2.p1	TRINITY_DN74946_c0_g2_i1.p1		TRINITY_DN74423_c0_g1_i1.p1	TRINITY_DN2150_c1_g1_i1.p1	TRINITY_DN8563_c0_g1_i4.p1	TRINITY_DN17479_c0_g1_i1.p1	TRINITY_DN10607_c0_g1_i2.p2	TRINITY_DN37191_c0_g1_i1.p1	TRINITY_DN10382_c0_g1_i2.p1	TRINITY_DN15638_c0_g1_i9.p2	TRINITY_DN5874_c0_g1_i3.p1	TRINITY_DN517_c0_g1_i15.p3	TRINITY_DN21818_c0_g1_i1.p1	TRINITY_DN23127_c0_g1_i2.p1	TRINITY_DN828_c0_g1_i1.p1	TRINITY_DN3360_c0_g1_i1.p2	TRINITY_DN12068_c1_g2_i5.p1	TRINITY_DN3586_c0_g1_i2.p1	TRINITY_DN20974_c0_g2_i1.p1	TRINITY_DN28834_c0_g1_i2.p1	TRINITY_DN78557_c0_g1_i1.p1	TRINITY_DN8979_c0_g1_i1.p1
138401at6656	TRUE	39	97.5	FBpp0075967	TRINITY_DN1123_c0_g1_i1.p1	TRINITY_DN1213_c0_g1_i1.p1	TRINITY_DN75477_c0_g1_i1.p1	c104188_g1_i1.p1	SMAR000223-PA	TRINITY_DN17514_c0_g1_i1.p1	TRINITY_DN23822_c0_g1_i1.p1	TRINITY_DN12529_c0_g1_i1.p1	TRINITY_DN15866_c0_g1_i1.p1	TRINITY_DN11173_c0_g1_i1.p1	TRINITY_DN17013_c0_g1_i1.p1	TRINITY_DN34070_c0_g1_i1.p1	TRINITY_DN19899_c0_g1_i1.p1	TRINITY_DN14479_c0_g1_i1.p1	TRINITY_DN15177_c0_g1_i1.p1	TRINITY_DN33757_c7_g2_i1.p1	TRINITY_DN72764_c0_g2_i1.p1	TRINITY_DN83654_c2_g1_i2.p2	TRINITY_DN41423_c0_g1_i1.p1	TRINITY_DN3274_c1_g1_i1.p1	TRINITY_DN2546_c1_g1_i1.p1	TRINITY_DN1690_c1_g3_i1.p1	TRINITY_DN4192_c0_g3_i1.p1	TRINITY_DN21944_c0_g1_i1.p1	TRINITY_DN52562_c0_g1_i1.p1	TRINITY_DN32811_c0_g1_i1.p1	TRINITY_DN12913_c0_g3_i1.p1	TRINITY_DN525_c0_g2_i1.p1	TRINITY_DN16528_c0_g1_i1.p1	TRINITY_DN20776_c0_g1_i1.p1	TRINITY_DN490_c0_g1_i1.p1	TRINITY_DN7254_c0_g1_i11.p2	TRINITY_DN4718_c0_g1_i2.p1	TRINITY_DN3976_c0_g1_i2.p1	TRINITY_DN4768_c0_g1_i1.p1		TRINITY_DN6801_c0_g1_i1.p1	TRINITY_DN84843_c0_g1_i1.p1	TRINITY_DN2563_c0_g1_i1.p1
156882at6656	FALSE	39	97.5	FBpp0071771	TRINITY_DN9372_c0_g2_i1.p1	TRINITY_DN25075_c0_g1_i1.p1	TRINITY_DN46258_c0_g1_i1.p1	c84702_g1_i2.p2	SMAR006105-PA	TRINITY_DN22262_c0_g1_i2.p1	TRINITY_DN30630_c1_g1_i1.p1	TRINITY_DN609_c0_g1_i3.p1	TRINITY_DN683_c0_g1_i13.p5	TRINITY_DN6676_c0_g1_i2.p1	TRINITY_DN5890_c0_g1_i1.p1	TRINITY_DN15603_c0_g1_i1.p1	TRINITY_DN7074_c0_g1_i1.p1	TRINITY_DN2492_c0_g1_i1.p1	TRINITY_DN6697_c0_g1_i1.p1	TRINITY_DN33484_c8_g1_i3.p4	TRINITY_DN56640_c0_g2_i1.p1	TRINITY_DN80555_c0_g1_i1.p1	TRINITY_DN67986_c0_g1_i1.p1		TRINITY_DN5335_c0_g1_i6.p1	TRINITY_DN32109_c0_g1_i1.p1	TRINITY_DN2667_c0_g1_i2.p1	TRINITY_DN4361_c0_g1_i1.p1	TRINITY_DN75345_c0_g1_i1.p1	TRINITY_DN5100_c0_g2_i1.p1	TRINITY_DN3844_c0_g1_i3.p1	TRINITY_DN7068_c0_g1_i6.p1	TRINITY_DN10270_c0_g1_i4.p1	TRINITY_DN28550_c0_g1_i5.p1	TRINITY_DN2349_c0_g1_i3.p1	TRINITY_DN3446_c0_g1_i7.p1	TRINITY_DN6526_c0_g1_i9.p2	TRINITY_DN3921_c0_g1_i1.p1	TRINITY_DN17314_c0_g1_i1.p1	TRINITY_DN21533_c0_g1_i1.p1	TRINITY_DN29102_c0_g1_i1.p1	TRINITY_DN75208_c1_g3_i1.p1	TRINITY_DN12730_c0_g1_i1.p1
141175at6656	TRUE	39	97.5	FBpp0078864	TRINITY_DN2103_c0_g1_i1.p1	TRINITY_DN34480_c0_g9_i1.p2	TRINITY_DN49540_c0_g1_i1.p3	c67069_g1_i2.p1	SMAR002451-PA	TRINITY_DN3789_c0_g1_i1.p1	TRINITY_DN42761_c2_g1_i1.p1	TRINITY_DN9260_c0_g1_i1.p1	TRINITY_DN146_c0_g1_i1.p1	TRINITY_DN2417_c0_g1_i2.p1	TRINITY_DN1291_c0_g1_i2.p1	TRINITY_DN116_c0_g1_i2.p1	TRINITY_DN634_c0_g1_i1.p1	TRINITY_DN12787_c0_g1_i1.p1	TRINITY_DN4416_c0_g1_i1.p1	TRINITY_DN9539_c0_g1_i1.p1	TRINITY_DN42615_c0_g1_i1.p1	TRINITY_DN84355_c0_g1_i1.p1		TRINITY_DN48335_c1_g1_i1.p1	TRINITY_DN306_c0_g1_i1.p1	TRINITY_DN7638_c0_g1_i2.p1	TRINITY_DN604_c2_g2_i5.p1	TRINITY_DN4591_c0_g1_i1.p1	TRINITY_DN780_c0_g1_i4.p1	TRINITY_DN764_c0_g2_i1.p1	TRINITY_DN3126_c0_g1_i3.p1	TRINITY_DN1376_c0_g1_i1.p1	TRINITY_DN4572_c0_g2_i4.p2	TRINITY_DN419_c0_g1_i2.p1	TRINITY_DN481_c0_g1_i2.p1	TRINITY_DN2504_c0_g1_i2.p1	TRINITY_DN2378_c0_g3_i1.p1	TRINITY_DN412_c0_g1_i13.p1	TRINITY_DN289_c0_g1_i1.p1	TRINITY_DN15672_c0_g1_i1.p1	TRINITY_DN30276_c0_g2_i1.p2	TRINITY_DN89341_c11_g2_i1.p1	TRINITY_DN8893_c0_g1_i1.p1
143930at6656	TRUE	39	97.5	FBpp0078450	TRINITY_DN17034_c0_g1_i1.p1	TRINITY_DN16831_c0_g1_i1.p1	TRINITY_DN46486_c0_g1_i1.p2	c65529_g1_i1.p1	SMAR010608-PA	TRINITY_DN20881_c0_g2_i1.p1	TRINITY_DN36755_c0_g1_i2.p1	TRINITY_DN1178_c0_g1_i1.p1	TRINITY_DN637_c0_g1_i2.p1	TRINITY_DN25366_c0_g1_i1.p1	TRINITY_DN8517_c0_g1_i1.p1	TRINITY_DN861_c0_g1_i2.p1	TRINITY_DN12031_c0_g1_i1.p1	TRINITY_DN6179_c2_g2_i1.p1	TRINITY_DN20655_c0_g1_i1.p1	TRINITY_DN23950_c3_g1_i1.p1	TRINITY_DN56330_c0_g1_i3.p1	TRINITY_DN98252_c0_g1_i1.p1	TRINITY_DN67894_c0_g1_i1.p1		TRINITY_DN38_c0_g1_i4.p1	TRINITY_DN5968_c0_g1_i1.p1	TRINITY_DN22120_c0_g1_i1.p1	TRINITY_DN1121_c0_g1_i1.p1	TRINITY_DN72020_c0_g1_i1.p1	TRINITY_DN40846_c0_g1_i2.p1	TRINITY_DN3769_c0_g1_i1.p1	TRINITY_DN3983_c0_g1_i1.p1	TRINITY_DN1178_c0_g1_i27.p1	TRINITY_DN5314_c0_g1_i1.p1	TRINITY_DN248_c0_g1_i2.p1	TRINITY_DN1052_c0_g1_i3.p1	TRINITY_DN2730_c0_g1_i1.p1	TRINITY_DN3870_c0_g1_i1.p1	TRINITY_DN28457_c0_g1_i1.p1	TRINITY_DN43501_c0_g1_i1.p1	TRINITY_DN29705_c0_g1_i1.p1	TRINITY_DN87739_c4_g1_i1.p1	TRINITY_DN13819_c0_g1_i1.p1
144836at6656	TRUE	39	97.5	FBpp0080943	TRINITY_DN6622_c0_g1_i1.p1	TRINITY_DN63163_c0_g1_i1.p1	TRINITY_DN43616_c0_g1_i1.p1	c40941_g1_i1.p1		TRINITY_DN19408_c0_g2_i1.p1	TRINITY_DN30732_c0_g1_i1.p1	TRINITY_DN41322_c0_g1_i1.p1	TRINITY_DN18935_c0_g1_i1.p1	TRINITY_DN872_c0_g1_i1.p1	TRINITY_DN23714_c0_g1_i1.p1	TRINITY_DN326_c0_g1_i1.p1	TRINITY_DN8119_c0_g1_i1.p1	TRINITY_DN3381_c0_g1_i3.p1	TRINITY_DN51613_c0_g1_i1.p1	TRINITY_DN55720_c0_g1_i1.p1	TRINITY_DN45045_c0_g1_i1.p1	TRINITY_DN48966_c0_g1_i1.p1	TRINITY_DN52136_c0_g1_i1.p1	TRINITY_DN34086_c0_g1_i1.p1	TRINITY_DN12998_c0_g1_i1.p1	TRINITY_DN2669_c0_g1_i1.p1	TRINITY_DN14739_c0_g1_i1.p1	TRINITY_DN14308_c0_g1_i1.p1	TRINITY_DN62646_c0_g1_i1.p1	TRINITY_DN2883_c0_g1_i1.p1	TRINITY_DN3257_c0_g1_i2.p1	TRINITY_DN3442_c0_g1_i1.p1	TRINITY_DN3296_c0_g1_i1.p1	TRINITY_DN23389_c0_g1_i1.p1	TRINITY_DN1039_c0_g1_i2.p1	TRINITY_DN8976_c0_g1_i12.p1	TRINITY_DN3228_c0_g1_i1.p1	TRINITY_DN9436_c0_g1_i2.p1	TRINITY_DN11269_c0_g1_i1.p1	TRINITY_DN40735_c0_g1_i1.p1	TRINITY_DN14878_c0_g1_i1.p1	TRINITY_DN35543_c0_g1_i1.p1	TRINITY_DN11440_c0_g1_i1.p1
148619at6656	TRUE	39	97.5	FBpp0305494	TRINITY_DN2620_c0_g1_i1.p1	TRINITY_DN24399_c0_g1_i2.p3	TRINITY_DN102193_c0_g1_i1.p1	c100020_g1_i6.p1	SMAR003306-PA	TRINITY_DN17330_c0_g1_i1.p1	TRINITY_DN26043_c0_g1_i1.p1	TRINITY_DN7650_c0_g1_i1.p1	TRINITY_DN4552_c0_g1_i2.p1	TRINITY_DN16153_c0_g1_i1.p1	TRINITY_DN13231_c0_g1_i3.p1	TRINITY_DN2072_c0_g1_i1.p1	TRINITY_DN3599_c0_g1_i1.p1	TRINITY_DN12948_c0_g1_i1.p1	TRINITY_DN21830_c0_g1_i1.p1	TRINITY_DN23482_c0_g1_i1.p1	TRINITY_DN61430_c0_g1_i1.p1	TRINITY_DN81845_c0_g1_i2.p1	TRINITY_DN40709_c0_g1_i1.p1		TRINITY_DN1608_c0_g3_i2.p1	TRINITY_DN668_c0_g1_i1.p1	TRINITY_DN25324_c0_g1_i1.p1	TRINITY_DN22956_c0_g1_i1.p1	TRINITY_DN63252_c0_g1_i1.p1	TRINITY_DN2002_c0_g1_i12.p1	TRINITY_DN27909_c0_g1_i1.p1	TRINITY_DN6596_c0_g1_i4.p3	TRINITY_DN11334_c2_g2_i5.p1	TRINITY_DN9959_c0_g1_i1.p1	TRINITY_DN3206_c0_g1_i1.p2	TRINITY_DN596_c0_g1_i3.p2	TRINITY_DN779_c0_g2_i1.p1	TRINITY_DN11284_c0_g1_i1.p1	TRINITY_DN2194_c0_g1_i1.p1	TRINITY_DN1789_c0_g1_i1.p1	TRINITY_DN25318_c0_g1_i3.p1	TRINITY_DN3381_c0_g1_i1.p1	TRINITY_DN13116_c9_g1_i1.p2
159542at6656	TRUE	39	97.5	FBpp0082333	TRINITY_DN40008_c0_g1_i1.p1	TRINITY_DN3701_c0_g1_i1.p1	TRINITY_DN97875_c0_g1_i1.p1	c72931_g1_i1.p1	SMAR012784-PA	TRINITY_DN17017_c0_g1_i1.p1	TRINITY_DN27233_c0_g1_i1.p1	TRINITY_DN9113_c0_g1_i1.p1	TRINITY_DN17295_c0_g1_i1.p1	TRINITY_DN32457_c0_g1_i1.p1	TRINITY_DN15145_c0_g1_i1.p1	TRINITY_DN30770_c0_g1_i1.p1	TRINITY_DN6179_c0_g1_i1.p1	TRINITY_DN18653_c0_g1_i1.p1	TRINITY_DN16720_c0_g1_i1.p1	TRINITY_DN25399_c0_g1_i3.p1	TRINITY_DN69836_c0_g3_i1.p1	TRINITY_DN60938_c0_g1_i1.p1	TRINITY_DN36308_c0_g2_i1.p1		TRINITY_DN1813_c2_g1_i1.p1	TRINITY_DN23227_c0_g1_i1.p1	TRINITY_DN15806_c0_g1_i1.p1	TRINITY_DN19198_c0_g1_i1.p1	TRINITY_DN399_c0_g1_i1.p1	TRINITY_DN7312_c0_g1_i4.p1	TRINITY_DN2218_c0_g1_i2.p1	TRINITY_DN6051_c0_g1_i1.p1	TRINITY_DN3375_c0_g1_i2.p1	TRINITY_DN19786_c0_g1_i1.p1	TRINITY_DN3293_c0_g1_i1.p1	TRINITY_DN443_c0_g1_i10.p1	TRINITY_DN2426_c0_g1_i2.p1	TRINITY_DN4117_c0_g2_i2.p1	TRINITY_DN18889_c0_g1_i1.p1	TRINITY_DN8633_c0_g1_i1.p1	TRINITY_DN31702_c1_g8_i3.p1	TRINITY_DN79727_c0_g1_i1.p1	TRINITY_DN13668_c0_g1_i1.p1
16648at6656	FALSE	38	95	FBpp0110543	TRINITY_DN17343_c0_g2_i2.p1	TRINITY_DN28629_c0_g1_i4.p1	TRINITY_DN52949_c0_g1_i1.p1	c97639_g1_i10.p1	SMAR005407-PA	TRINITY_DN25740_c0_g1_i3.p1	TRINITY_DN34467_c0_g1_i1.p1	TRINITY_DN692_c0_g1_i6.p1	TRINITY_DN6091_c0_g1_i1.p1	TRINITY_DN447_c0_g1_i16.p1	TRINITY_DN17170_c0_g1_i1.p1	TRINITY_DN4055_c0_g1_i1.p1		TRINITY_DN32761_c0_g1_i1.p1	TRINITY_DN31897_c0_g1_i5.p1	TRINITY_DN26480_c0_g3_i2.p1	TRINITY_DN129230_c0_g1_i1.p1	TRINITY_DN66064_c1_g1_i1.p1		TRINITY_DN29623_c0_g1_i1.p1	TRINITY_DN1765_c2_g1_i1.p1	TRINITY_DN2146_c0_g1_i3.p2	TRINITY_DN24611_c0_g1_i1.p1	TRINITY_DN19781_c0_g1_i1.p1	TRINITY_DN3305_c0_g1_i1.p1	TRINITY_DN62813_c0_g1_i1.p1	TRINITY_DN3000_c1_g2_i2.p1	TRINITY_DN9394_c0_g3_i2.p1	TRINITY_DN6124_c0_g1_i6.p1	TRINITY_DN1842_c0_g1_i2.p1	TRINITY_DN28108_c0_g1_i1.p1	TRINITY_DN3865_c0_g1_i18.p2	TRINITY_DN6343_c0_g2_i18.p1	TRINITY_DN34574_c0_g1_i1.p1	TRINITY_DN14135_c0_g1_i1.p1	TRINITY_DN25331_c0_g2_i1.p1	TRINITY_DN30310_c1_g4_i4.p1	TRINITY_DN53420_c0_g1_i1.p1	TRINITY_DN2298_c0_g1_i1.p1
160675at6656	TRUE	39	97.5	FBpp0075631	TRINITY_DN16801_c0_g1_i1.p1	TRINITY_DN17300_c0_g1_i1.p1	TRINITY_DN73341_c0_g1_i1.p1	c83591_g1_i1.p1	SMAR001698-PA	TRINITY_DN3415_c0_g2_i1.p1	TRINITY_DN29667_c0_g2_i1.p1	TRINITY_DN6295_c1_g1_i1.p1	TRINITY_DN1614_c0_g1_i1.p3	TRINITY_DN30052_c0_g1_i1.p1	TRINITY_DN32004_c0_g1_i1.p1	TRINITY_DN30107_c0_g1_i1.p1	TRINITY_DN32371_c0_g1_i1.p2	TRINITY_DN31001_c0_g1_i1.p1		TRINITY_DN26521_c0_g1_i2.p1	TRINITY_DN71535_c0_g1_i1.p1	TRINITY_DN86564_c4_g1_i1.p2	TRINITY_DN31196_c0_g1_i2.p1	TRINITY_DN5245_c0_g1_i1.p1	TRINITY_DN4273_c0_g1_i3.p1	TRINITY_DN30833_c0_g1_i1.p1	TRINITY_DN810_c5_g1_i1.p1	TRINITY_DN2284_c0_g1_i10.p1	TRINITY_DN63604_c0_g1_i1.p1	TRINITY_DN2888_c0_g1_i1.p1	TRINITY_DN4835_c0_g1_i1.p1	TRINITY_DN57019_c0_g1_i1.p1	TRINITY_DN7436_c0_g2_i1.p1	TRINITY_DN3227_c0_g2_i1.p1	TRINITY_DN7178_c0_g1_i2.p1	TRINITY_DN3848_c0_g1_i8.p3	TRINITY_DN9572_c0_g1_i1.p1	TRINITY_DN10575_c1_g1_i1.p1	TRINITY_DN24815_c0_g1_i1.p1	TRINITY_DN1594_c0_g1_i1.p1	TRINITY_DN13082_c0_g1_i2.p1	TRINITY_DN63637_c0_g1_i1.p1	TRINITY_DN13436_c0_g1_i1.p1
163896at6656	TRUE	39	97.5	FBpp0078822	TRINITY_DN71295_c0_g1_i1.p1	TRINITY_DN52523_c0_g1_i1.p1	TRINITY_DN50595_c1_g1_i2.p3	c76520_g1_i1.p1	SMAR004633-PA	TRINITY_DN12427_c0_g1_i1.p1	TRINITY_DN29924_c0_g2_i1.p1	TRINITY_DN900_c0_g1_i1.p1	TRINITY_DN22710_c0_g1_i1.p2	TRINITY_DN21061_c0_g1_i1.p1	TRINITY_DN32927_c0_g1_i1.p1	TRINITY_DN881_c0_g1_i1.p1	TRINITY_DN1717_c0_g1_i1.p1	TRINITY_DN22390_c0_g1_i1.p1	TRINITY_DN16803_c0_g1_i1.p1	TRINITY_DN22057_c0_g1_i1.p1	TRINITY_DN70697_c0_g1_i1.p1	TRINITY_DN43107_c0_g1_i1.p1	TRINITY_DN28196_c0_g1_i1.p1		TRINITY_DN2284_c0_g1_i1.p1	TRINITY_DN8551_c0_g1_i1.p1	TRINITY_DN4778_c0_g1_i1.p1	TRINITY_DN15847_c0_g1_i2.p1	TRINITY_DN74682_c0_g1_i1.p1	TRINITY_DN8871_c0_g1_i1.p1	TRINITY_DN2354_c0_g1_i1.p1	TRINITY_DN2047_c0_g1_i1.p1	TRINITY_DN29170_c0_g1_i1.p1	TRINITY_DN28532_c0_g1_i2.p1	TRINITY_DN7273_c0_g1_i1.p1	TRINITY_DN1781_c0_g1_i1.p2	TRINITY_DN205_c0_g1_i14.p1	TRINITY_DN3305_c0_g1_i1.p1	TRINITY_DN14045_c0_g1_i1.p1	TRINITY_DN19031_c0_g2_i1.p1	TRINITY_DN57000_c0_g1_i1.p1	TRINITY_DN153153_c0_g1_i1.p1	TRINITY_DN15839_c0_g1_i1.p1
165493at6656	TRUE	39	97.5	FBpp0070766	TRINITY_DN52863_c0_g1_i1.p1	TRINITY_DN6966_c0_g1_i1.p1	TRINITY_DN46461_c0_g1_i1.p3	c63738_g1_i1.p1	SMAR003512-PA	TRINITY_DN32225_c1_g1_i1.p1	TRINITY_DN120814_c2_g1_i1.p1	TRINITY_DN11058_c0_g1_i1.p1	TRINITY_DN15427_c0_g1_i1.p1	TRINITY_DN2976_c0_g1_i2.p2	TRINITY_DN17108_c0_g1_i1.p1	TRINITY_DN624_c0_g1_i1.p1	TRINITY_DN29466_c0_g1_i1.p1	TRINITY_DN31214_c0_g1_i1.p1	TRINITY_DN17700_c0_g1_i1.p2	TRINITY_DN33491_c2_g1_i1.p3	TRINITY_DN54650_c0_g1_i1.p1	TRINITY_DN78862_c0_g1_i1.p1	TRINITY_DN41584_c0_g1_i1.p1	TRINITY_DN37340_c0_g1_i1.p1	TRINITY_DN16317_c0_g1_i2.p1	TRINITY_DN1511_c0_g1_i1.p1	TRINITY_DN19830_c0_g1_i1.p1	TRINITY_DN17006_c0_g1_i1.p1	TRINITY_DN3869_c0_g1_i1.p1	TRINITY_DN720_c0_g1_i2.p1	TRINITY_DN1164_c0_g1_i1.p2	TRINITY_DN941_c0_g1_i1.p1	TRINITY_DN2784_c0_g1_i18.p2	TRINITY_DN23221_c0_g1_i1.p1	TRINITY_DN19042_c0_g1_i1.p1	TRINITY_DN1108_c0_g1_i3.p1	TRINITY_DN529_c0_g1_i1.p4	TRINITY_DN266_c0_g2_i2.p2	TRINITY_DN13835_c0_g1_i1.p2	TRINITY_DN4553_c0_g1_i1.p1	TRINITY_DN21684_c0_g1_i1.p2		TRINITY_DN13832_c0_g1_i1.p1
26734at6656	FALSE	39	97.5	FBpp0070637	TRINITY_DN18031_c0_g1_i1.p1	TRINITY_DN33575_c1_g1_i1.p1	TRINITY_DN51072_c0_g1_i3.p1	c98786_g1_i7.p1	SMAR000318-PA	TRINITY_DN26101_c0_g5_i1.p1	TRINITY_DN35337_c0_g1_i1.p1	TRINITY_DN43858_c0_g1_i1.p1	TRINITY_DN1355_c2_g1_i24.p1	TRINITY_DN7564_c0_g1_i1.p1	TRINITY_DN6998_c0_g1_i1.p1	TRINITY_DN3822_c0_g1_i20.p1		TRINITY_DN17286_c0_g1_i1.p1	TRINITY_DN68115_c0_g1_i1.p1	TRINITY_DN29057_c0_g1_i2.p1	TRINITY_DN70573_c0_g1_i3.p1	TRINITY_DN80761_c0_g1_i2.p1	TRINITY_DN35059_c0_g2_i1.p1	TRINITY_DN32350_c0_g1_i1.p1	TRINITY_DN3416_c0_g1_i3.p1	TRINITY_DN23555_c0_g1_i1.p1	TRINITY_DN5130_c0_g1_i1.p1	TRINITY_DN16053_c0_g2_i1.p1	TRINITY_DN3211_c0_g1_i1.p1	TRINITY_DN5859_c0_g1_i5.p1	TRINITY_DN6750_c0_g1_i3.p1	TRINITY_DN2283_c0_g1_i4.p1	TRINITY_DN1424_c0_g1_i10.p1	TRINITY_DN14548_c0_g1_i2.p1	TRINITY_DN1209_c0_g1_i28.p2	TRINITY_DN234_c0_g1_i4.p1	TRINITY_DN1905_c1_g2_i4.p1	TRINITY_DN30810_c0_g1_i1.p1	TRINITY_DN2555_c0_g1_i1.p1	TRINITY_DN25188_c0_g1_i1.p1	TRINITY_DN30821_c0_g1_i3.p1	TRINITY_DN10104_c0_g1_i1.p1	TRINITY_DN11935_c0_g1_i1.p1
27198at6656	FALSE	39	97.5	FBpp0071045	TRINITY_DN15266_c0_g1_i1.p1	TRINITY_DN30651_c0_g1_i1.p1	TRINITY_DN51783_c1_g1_i1.p1	c96614_g1_i2.p1	SMAR006014-PA	TRINITY_DN27402_c0_g1_i2.p1	TRINITY_DN35628_c0_g1_i1.p1	TRINITY_DN7611_c0_g1_i1.p1	TRINITY_DN4010_c0_g1_i2.p1	TRINITY_DN18402_c0_g1_i1.p1	TRINITY_DN4412_c2_g1_i1.p1	TRINITY_DN778_c0_g1_i1.p1	TRINITY_DN30206_c0_g1_i1.p1	TRINITY_DN30889_c0_g1_i1.p1	TRINITY_DN489_c0_g2_i1.p1	TRINITY_DN17900_c0_g1_i1.p1	TRINITY_DN69883_c0_g1_i1.p1	TRINITY_DN77972_c0_g3_i1.p1	TRINITY_DN44118_c0_g1_i1.p1		TRINITY_DN795_c5_g1_i1.p1	TRINITY_DN48419_c0_g1_i1.p1	TRINITY_DN3842_c0_g1_i1.p1	TRINITY_DN35474_c0_g1_i1.p1	TRINITY_DN1507_c0_g1_i4.p1	TRINITY_DN54865_c0_g1_i1.p1	TRINITY_DN7066_c0_g1_i2.p1	TRINITY_DN4796_c0_g1_i2.p1	TRINITY_DN5581_c0_g1_i3.p1	TRINITY_DN6072_c1_g1_i3.p1	TRINITY_DN32445_c0_g1_i1.p1	TRINITY_DN82321_c0_g1_i1.p1	TRINITY_DN863_c0_g1_i2.p1	TRINITY_DN7868_c0_g2_i9.p1	TRINITY_DN1235_c0_g1_i3.p1	TRINITY_DN24964_c0_g1_i1.p1	TRINITY_DN27587_c0_g3_i9.p1	TRINITY_DN73957_c0_g1_i1.p1	TRINITY_DN12473_c0_g1_i1.p1
21385at6656	TRUE	39	97.5	FBpp0073679	TRINITY_DN7008_c0_g1_i1.p1	TRINITY_DN30150_c0_g1_i1.p1	TRINITY_DN50838_c0_g1_i1.p1	c87105_g1_i1.p1	SMAR012830-PA	TRINITY_DN25985_c0_g2_i1.p1	TRINITY_DN39360_c1_g1_i1.p1	TRINITY_DN2145_c0_g1_i1.p1	TRINITY_DN5447_c0_g1_i1.p1	TRINITY_DN7186_c0_g1_i1.p1	TRINITY_DN263_c0_g1_i1.p1	TRINITY_DN40784_c0_g1_i1.p1	TRINITY_DN7649_c0_g1_i1.p1	TRINITY_DN1165_c0_g1_i1.p1	TRINITY_DN29145_c0_g1_i1.p1	TRINITY_DN33637_c0_g2_i5.p1	TRINITY_DN34184_c0_g1_i1.p1	TRINITY_DN80271_c1_g4_i1.p1		TRINITY_DN33942_c1_g1_i1.p1	TRINITY_DN1543_c0_g1_i2.p1	TRINITY_DN13437_c0_g1_i1.p1	TRINITY_DN3803_c0_g1_i1.p1	TRINITY_DN17254_c0_g1_i1.p1	TRINITY_DN60409_c0_g1_i1.p1	TRINITY_DN9101_c0_g1_i1.p1	TRINITY_DN14214_c0_g1_i1.p1	TRINITY_DN11543_c0_g1_i2.p1	TRINITY_DN2569_c0_g1_i4.p1	TRINITY_DN27591_c0_g1_i5.p1	TRINITY_DN18161_c0_g1_i1.p1	TRINITY_DN8625_c0_g1_i9.p1	TRINITY_DN2021_c0_g1_i1.p1	TRINITY_DN7681_c0_g1_i3.p1	TRINITY_DN14299_c0_g1_i1.p1	TRINITY_DN10613_c0_g1_i1.p1	TRINITY_DN31473_c0_g1_i4.p1	TRINITY_DN90929_c0_g1_i2.p1	TRINITY_DN12976_c0_g1_i1.p1
22098at6656	TRUE	39	97.5	FBpp0074348	TRINITY_DN15417_c0_g2_i1.p1	TRINITY_DN30403_c0_g1_i1.p1	TRINITY_DN48572_c0_g1_i1.p1	c86492_g1_i1.p1	SMAR011022-PA	TRINITY_DN24565_c0_g3_i2.p1	TRINITY_DN40027_c0_g1_i1.p1	TRINITY_DN3182_c0_g1_i1.p1	TRINITY_DN6477_c0_g1_i11.p1	TRINITY_DN30175_c0_g1_i1.p1	TRINITY_DN1767_c2_g1_i1.p1	TRINITY_DN12474_c0_g1_i1.p1	TRINITY_DN30685_c0_g1_i2.p2	TRINITY_DN26533_c0_g1_i1.p1	TRINITY_DN28994_c0_g1_i1.p1	TRINITY_DN30323_c0_g1_i4.p1	TRINITY_DN69348_c0_g2_i1.p1	TRINITY_DN83178_c0_g1_i1.p1	TRINITY_DN41308_c1_g1_i1.p1	TRINITY_DN45127_c0_g1_i1.p1	TRINITY_DN13063_c0_g3_i1.p1	TRINITY_DN19400_c0_g1_i1.p1	TRINITY_DN19520_c0_g1_i1.p1	TRINITY_DN27765_c0_g1_i1.p1		TRINITY_DN43000_c0_g1_i1.p1	TRINITY_DN472_c0_g1_i4.p1	TRINITY_DN1826_c0_g1_i1.p1	TRINITY_DN2348_c0_g1_i9.p1	TRINITY_DN18454_c0_g1_i2.p1	TRINITY_DN6262_c0_g1_i3.p1	TRINITY_DN729_c0_g2_i3.p1	TRINITY_DN54_c0_g1_i4.p1	TRINITY_DN3508_c0_g1_i6.p1	TRINITY_DN1875_c0_g1_i1.p1	TRINITY_DN25285_c0_g1_i1.p1	TRINITY_DN30859_c0_g1_i6.p1	TRINITY_DN92705_c5_g1_i1.p1	TRINITY_DN12641_c0_g1_i1.p1
3310at6656	TRUE	39	97.5	FBpp0073966	TRINITY_DN18914_c0_g1_i1.p1	TRINITY_DN29691_c0_g2_i3.p1	TRINITY_DN52983_c0_g1_i1.p1	c94084_g1_i2.p1	SMAR007791-PA	TRINITY_DN28200_c0_g1_i1.p1	TRINITY_DN38860_c1_g1_i1.p1	TRINITY_DN2657_c0_g1_i1.p1	TRINITY_DN1199_c0_g1_i3.p1	TRINITY_DN30649_c0_g1_i1.p1	TRINITY_DN1500_c0_g1_i1.p1	TRINITY_DN1045_c0_g1_i2.p1		TRINITY_DN1318_c0_g1_i1.p1	TRINITY_DN30324_c0_g1_i1.p1	TRINITY_DN28972_c1_g1_i1.p1	TRINITY_DN68646_c0_g1_i1.p1	TRINITY_DN87942_c5_g1_i1.p1	TRINITY_DN14917_c0_g1_i1.p1	TRINITY_DN48713_c0_g1_i1.p1	TRINITY_DN14172_c0_g1_i1.p1	TRINITY_DN1977_c0_g1_i1.p1	TRINITY_DN186_c0_g1_i6.p1	TRINITY_DN141_c0_g1_i3.p1	TRINITY_DN66_c0_g1_i2.p1	TRINITY_DN82_c0_g1_i18.p1	TRINITY_DN9372_c0_g1_i4.p1	TRINITY_DN921_c0_g1_i3.p1	TRINITY_DN3118_c1_g3_i2.p1	TRINITY_DN2380_c0_g1_i3.p1	TRINITY_DN5029_c0_g2_i2.p1	TRINITY_DN20221_c0_g1_i4.p1	TRINITY_DN14866_c0_g1_i1.p1	TRINITY_DN764_c0_g1_i2.p1	TRINITY_DN2846_c0_g7_i1.p1	TRINITY_DN20053_c0_g1_i1.p1	TRINITY_DN31865_c0_g1_i1.p1	TRINITY_DN87942_c0_g1_i1.p1	TRINITY_DN12197_c0_g1_i1.p1
35995at6656	TRUE	39	97.5	FBpp0077129	TRINITY_DN16686_c0_g1_i1.p1	TRINITY_DN26281_c0_g1_i1.p1	TRINITY_DN50003_c0_g1_i1.p1	c100037_g1_i5.p1	SMAR011918-PA	TRINITY_DN25421_c0_g3_i1.p1	TRINITY_DN38240_c0_g1_i2.p1	TRINITY_DN6425_c0_g1_i1.p1	TRINITY_DN10624_c0_g1_i1.p1	TRINITY_DN1946_c0_g1_i1.p1	TRINITY_DN7918_c0_g1_i2.p1	TRINITY_DN4366_c0_g1_i2.p1	TRINITY_DN30387_c0_g1_i1.p1	TRINITY_DN26536_c0_g1_i1.p1	TRINITY_DN74350_c0_g1_i1.p1	TRINITY_DN33441_c1_g3_i2.p1	TRINITY_DN9496_c0_g2_i1.p1	TRINITY_DN87178_c2_g1_i5.p1	TRINITY_DN37854_c0_g1_i1.p1		TRINITY_DN1662_c0_g1_i1.p1	TRINITY_DN2816_c0_g1_i1.p1	TRINITY_DN2687_c0_g1_i1.p1	TRINITY_DN10990_c0_g1_i2.p1	TRINITY_DN72070_c0_g1_i1.p1	TRINITY_DN6725_c0_g2_i1.p1	TRINITY_DN5282_c0_g2_i1.p1	TRINITY_DN5907_c0_g1_i8.p1	TRINITY_DN11501_c0_g1_i1.p1	TRINITY_DN14028_c0_g1_i6.p1	TRINITY_DN22885_c0_g1_i1.p1	TRINITY_DN2002_c0_g1_i1.p1	TRINITY_DN983_c0_g1_i3.p1	TRINITY_DN24882_c0_g1_i1.p1	TRINITY_DN1851_c0_g1_i5.p1	TRINITY_DN24214_c0_g1_i1.p1	TRINITY_DN30763_c0_g1_i4.p1	TRINITY_DN13557_c0_g1_i1.p1	TRINITY_DN11953_c0_g1_i1.p1
39548at6656	TRUE	39	97.5	FBpp0079445	TRINITY_DN15891_c0_g3_i1.p1	TRINITY_DN29465_c0_g2_i1.p1	TRINITY_DN48889_c0_g1_i1.p1	c71684_g1_i1.p1		TRINITY_DN24517_c0_g2_i1.p1	TRINITY_DN26933_c0_g1_i1.p1	TRINITY_DN3172_c0_g1_i2.p1	TRINITY_DN3758_c0_g1_i1.p1	TRINITY_DN6202_c0_g1_i1.p1	TRINITY_DN8368_c0_g1_i1.p1	TRINITY_DN28194_c0_g1_i1.p1	TRINITY_DN45177_c0_g1_i3.p1	TRINITY_DN9937_c0_g1_i1.p1	TRINITY_DN86239_c0_g1_i1.p1	TRINITY_DN33175_c1_g1_i7.p1	TRINITY_DN64610_c0_g1_i1.p1	TRINITY_DN84010_c1_g2_i1.p1	TRINITY_DN18570_c0_g1_i1.p2	TRINITY_DN29809_c0_g1_i1.p1	TRINITY_DN29946_c0_g1_i1.p1	TRINITY_DN4610_c0_g1_i8.p1	TRINITY_DN19652_c0_g1_i3.p1	TRINITY_DN1100_c0_g1_i1.p1	TRINITY_DN6866_c0_g1_i1.p1	TRINITY_DN10784_c0_g1_i4.p1	TRINITY_DN2513_c0_g1_i3.p1	TRINITY_DN1517_c0_g3_i2.p1	TRINITY_DN1438_c0_g1_i1.p1	TRINITY_DN19062_c0_g1_i1.p1	TRINITY_DN6273_c0_g1_i1.p1	TRINITY_DN4103_c0_g1_i1.p1	TRINITY_DN3309_c0_g1_i1.p1	TRINITY_DN3377_c0_g1_i1.p1	TRINITY_DN2467_c0_g1_i1.p1	TRINITY_DN6062_c0_g1_i1.p1	TRINITY_DN29483_c0_g6_i6.p1	TRINITY_DN91054_c10_g4_i1.p1	TRINITY_DN11198_c0_g1_i1.p1
40065at6656	FALSE	39	97.5	FBpp0079454	TRINITY_DN4908_c0_g1_i1.p1	TRINITY_DN29431_c0_g1_i1.p1	TRINITY_DN51464_c0_g1_i1.p1	c97709_g1_i1.p1	SMAR006931-PA	TRINITY_DN26986_c0_g1_i1.p1	TRINITY_DN40965_c1_g2_i1.p1	TRINITY_DN26_c0_g1_i1.p1	TRINITY_DN1898_c0_g1_i1.p1	TRINITY_DN635_c0_g1_i1.p1	TRINITY_DN700_c0_g1_i2.p1	TRINITY_DN1312_c0_g1_i1.p1	TRINITY_DN2292_c0_g1_i2.p1	TRINITY_DN278_c0_g1_i1.p1	TRINITY_DN28319_c0_g1_i1.p1	TRINITY_DN27039_c0_g2_i1.p1	TRINITY_DN61499_c0_g1_i1.p1	TRINITY_DN84901_c0_g2_i1.p1		TRINITY_DN62876_c0_g1_i1.p1	TRINITY_DN1780_c0_g1_i1.p1	TRINITY_DN506_c0_g1_i1.p1	TRINITY_DN1817_c0_g1_i1.p1	TRINITY_DN175_c0_g2_i1.p1	TRINITY_DN587_c0_g1_i1.p1	TRINITY_DN2295_c0_g1_i5.p1	TRINITY_DN2919_c0_g1_i1.p1	TRINITY_DN683_c0_g1_i1.p1	TRINITY_DN3515_c0_g1_i1.p1	TRINITY_DN2062_c0_g1_i2.p1	TRINITY_DN1525_c0_g1_i2.p1	TRINITY_DN167_c0_g2_i7.p1	TRINITY_DN2694_c0_g1_i1.p1	TRINITY_DN2022_c0_g1_i1.p1	TRINITY_DN17928_c0_g1_i1.p1	TRINITY_DN43773_c0_g1_i1.p1	TRINITY_DN31719_c1_g1_i1.p1	TRINITY_DN81104_c0_g1_i1.p1	TRINITY_DN8328_c0_g1_i1.p1
43236at6656	TRUE	39	97.5	FBpp0311664	TRINITY_DN19092_c0_g1_i2.p1	TRINITY_DN14732_c0_g1_i1.p1	TRINITY_DN48217_c0_g1_i1.p1	c81908_g1_i2.p1	SMAR011509-PA	TRINITY_DN4833_c1_g2_i1.p1	TRINITY_DN42186_c0_g1_i1.p1	TRINITY_DN8826_c0_g2_i1.p1	TRINITY_DN126_c1_g2_i1.p1	TRINITY_DN1453_c0_g1_i2.p1	TRINITY_DN6410_c0_g1_i2.p1	TRINITY_DN5215_c0_g1_i1.p1	TRINITY_DN1687_c0_g1_i2.p1	TRINITY_DN3567_c0_g1_i1.p1	TRINITY_DN28428_c0_g2_i1.p1	TRINITY_DN32647_c22_g4_i1.p1	TRINITY_DN73140_c1_g1_i1.p1	TRINITY_DN87898_c2_g7_i1.p1	TRINITY_DN40525_c0_g1_i1.p1	TRINITY_DN29699_c0_g1_i1.p2	TRINITY_DN32354_c0_g1_i1.p1	TRINITY_DN12732_c0_g1_i1.p1	TRINITY_DN740_c0_g1_i4.p1	TRINITY_DN28_c0_g1_i2.p1		TRINITY_DN1512_c0_g1_i2.p1	TRINITY_DN850_c0_g1_i13.p1	TRINITY_DN234_c0_g1_i12.p1	TRINITY_DN827_c0_g1_i1.p1	TRINITY_DN3333_c0_g1_i1.p1	TRINITY_DN1828_c0_g1_i1.p1	TRINITY_DN54821_c0_g1_i2.p1	TRINITY_DN4173_c0_g1_i1.p1	TRINITY_DN1023_c0_g1_i9.p1	TRINITY_DN419_c0_g1_i1.p1	TRINITY_DN6098_c0_g1_i1.p1	TRINITY_DN31973_c1_g1_i3.p1	TRINITY_DN91958_c2_g1_i1.p1	TRINITY_DN13190_c5_g1_i1.p1
43774at6656	TRUE	39	97.5	FBpp0078400	TRINITY_DN9546_c0_g2_i1.p1	TRINITY_DN31577_c0_g1_i1.p1	TRINITY_DN52930_c0_g1_i1.p2	c82837_g1_i1.p1	SMAR007390-PA	TRINITY_DN26471_c0_g3_i3.p1	TRINITY_DN42594_c1_g1_i1.p1	TRINITY_DN15701_c1_g1_i2.p1	TRINITY_DN627_c0_g1_i30.p3	TRINITY_DN2919_c0_g1_i1.p1	TRINITY_DN1511_c0_g1_i1.p1	TRINITY_DN12427_c0_g1_i1.p1	TRINITY_DN585_c0_g1_i1.p1	TRINITY_DN3410_c0_g1_i5.p1	TRINITY_DN28648_c0_g1_i1.p1	TRINITY_DN32344_c0_g1_i1.p1	TRINITY_DN57665_c0_g1_i3.p1	TRINITY_DN85305_c0_g1_i1.p1	TRINITY_DN95438_c0_g1_i1.p1		TRINITY_DN32424_c0_g1_i1.p1	TRINITY_DN23765_c0_g1_i1.p1	TRINITY_DN25053_c0_g1_i1.p1	TRINITY_DN3719_c0_g1_i3.p1	TRINITY_DN18183_c0_g1_i1.p1	TRINITY_DN3936_c0_g1_i3.p1	TRINITY_DN1213_c0_g3_i3.p1	TRINITY_DN4100_c0_g1_i1.p1	TRINITY_DN5688_c0_g1_i1.p1	TRINITY_DN3477_c0_g1_i2.p2	TRINITY_DN1356_c0_g1_i12.p1	TRINITY_DN32106_c0_g1_i4.p1	TRINITY_DN3376_c0_g1_i1.p1	TRINITY_DN7465_c0_g1_i2.p1	TRINITY_DN2127_c1_g1_i1.p1	TRINITY_DN18233_c0_g2_i1.p1	TRINITY_DN30164_c1_g1_i4.p1	TRINITY_DN92566_c4_g1_i1.p1	TRINITY_DN2359_c0_g1_i1.p1
45528at6656	TRUE	39	97.5	FBpp0077998	TRINITY_DN125_c0_g3_i1.p1	TRINITY_DN20003_c0_g1_i1.p1	TRINITY_DN51757_c0_g1_i1.p1	c90542_g1_i1.p1	SMAR005480-PA	TRINITY_DN25604_c0_g1_i3.p1	TRINITY_DN28836_c0_g1_i1.p1	TRINITY_DN43455_c0_g1_i2.p1	TRINITY_DN6791_c0_g1_i2.p1	TRINITY_DN20825_c0_g1_i1.p1	TRINITY_DN3303_c0_g1_i2.p1	TRINITY_DN34255_c0_g1_i2.p1	TRINITY_DN24794_c0_g1_i1.p1	TRINITY_DN31055_c0_g1_i1.p1	TRINITY_DN50703_c0_g1_i1.p1	TRINITY_DN23029_c0_g1_i1.p1	TRINITY_DN70159_c0_g1_i2.p1	TRINITY_DN81905_c1_g1_i1.p1	TRINITY_DN45034_c0_g4_i1.p1		TRINITY_DN41797_c0_g1_i1.p1	TRINITY_DN40518_c0_g1_i1.p1	TRINITY_DN2164_c0_g1_i2.p1	TRINITY_DN6556_c0_g1_i3.p1	TRINITY_DN72754_c0_g1_i1.p1	TRINITY_DN23017_c0_g1_i2.p1	TRINITY_DN3040_c0_g2_i1.p1	TRINITY_DN4669_c0_g1_i4.p1	TRINITY_DN307_c1_g1_i3.p1	TRINITY_DN2852_c0_g1_i5.p1	TRINITY_DN8483_c0_g1_i1.p1	TRINITY_DN3128_c0_g1_i7.p1	TRINITY_DN22274_c0_g1_i1.p1	TRINITY_DN7121_c0_g2_i1.p1	TRINITY_DN26931_c0_g1_i1.p1	TRINITY_DN10055_c0_g1_i1.p1	TRINITY_DN31069_c0_g1_i3.p1	TRINITY_DN91435_c0_g2_i2.p1	TRINITY_DN13001_c1_g1_i1.p1
48657at6656	TRUE	39	97.5	FBpp0079458	TRINITY_DN14116_c0_g1_i1.p1	TRINITY_DN30083_c0_g1_i1.p1	TRINITY_DN41221_c0_g1_i1.p1	c79303_g1_i1.p1	SMAR008013-PA	TRINITY_DN13368_c1_g1_i1.p1	TRINITY_DN35191_c1_g1_i1.p1	TRINITY_DN3554_c0_g1_i1.p1	TRINITY_DN696_c0_g1_i1.p1	TRINITY_DN3091_c0_g1_i1.p1	TRINITY_DN2039_c0_g1_i1.p1	TRINITY_DN1072_c0_g1_i1.p1		TRINITY_DN31488_c0_g1_i1.p1	TRINITY_DN50363_c0_g1_i1.p1	TRINITY_DN31487_c0_g1_i1.p1	TRINITY_DN71413_c0_g1_i1.p1	TRINITY_DN86559_c0_g1_i2.p1	TRINITY_DN20305_c0_g1_i1.p1	TRINITY_DN41250_c0_g1_i1.p1	TRINITY_DN6343_c0_g1_i2.p1	TRINITY_DN5103_c0_g1_i1.p1	TRINITY_DN624_c0_g1_i2.p1	TRINITY_DN2010_c0_g1_i1.p1	TRINITY_DN102_c0_g1_i1.p1	TRINITY_DN21135_c0_g1_i1.p1	TRINITY_DN3535_c1_g1_i4.p1	TRINITY_DN778_c0_g1_i12.p1	TRINITY_DN3012_c0_g1_i2.p1	TRINITY_DN1280_c1_g1_i4.p1	TRINITY_DN406_c0_g1_i1.p1	TRINITY_DN4757_c0_g1_i10.p1	TRINITY_DN3885_c0_g1_i1.p1	TRINITY_DN9785_c0_g1_i1.p1	TRINITY_DN590_c0_g1_i1.p1	TRINITY_DN23493_c0_g1_i1.p1	TRINITY_DN28529_c0_g1_i1.p1	TRINITY_DN89928_c0_g1_i1.p1	TRINITY_DN11880_c0_g1_i1.p1
49526at6656	TRUE	39	97.5	FBpp0070336	TRINITY_DN8638_c0_g2_i1.p1	TRINITY_DN32441_c0_g1_i2.p1	TRINITY_DN51469_c0_g1_i2.p1	c98795_g1_i3.p1	SMAR015078-PA	TRINITY_DN26423_c0_g3_i1.p1	TRINITY_DN37890_c0_g2_i1.p1	TRINITY_DN9101_c0_g1_i1.p1	TRINITY_DN5276_c0_g1_i2.p1	TRINITY_DN7029_c0_g1_i2.p1	TRINITY_DN12082_c0_g1_i1.p1	TRINITY_DN40772_c0_g1_i1.p1	TRINITY_DN264_c0_g2_i1.p1	TRINITY_DN12852_c0_g1_i1.p1	TRINITY_DN24760_c0_g3_i1.p1	TRINITY_DN16505_c0_g1_i1.p1	TRINITY_DN64994_c0_g1_i1.p1	TRINITY_DN87077_c0_g1_i3.p1	TRINITY_DN3673_c0_g1_i1.p1		TRINITY_DN29917_c0_g1_i1.p1	TRINITY_DN10684_c0_g1_i1.p1	TRINITY_DN21962_c0_g1_i1.p1	TRINITY_DN10360_c0_g1_i31.p2	TRINITY_DN61642_c0_g1_i1.p1	TRINITY_DN60989_c0_g1_i1.p1	TRINITY_DN42935_c0_g1_i1.p1	TRINITY_DN3613_c0_g1_i10.p1	TRINITY_DN4622_c0_g1_i10.p2	TRINITY_DN2447_c0_g1_i1.p2	TRINITY_DN1735_c0_g2_i5.p1	TRINITY_DN4031_c0_g1_i4.p1	TRINITY_DN11362_c0_g1_i1.p1	TRINITY_DN4503_c0_g1_i2.p1	TRINITY_DN15444_c0_g1_i1.p1	TRINITY_DN22735_c0_g2_i1.p1	TRINITY_DN27603_c0_g1_i1.p1	TRINITY_DN91647_c0_g1_i2.p1	TRINITY_DN13103_c0_g1_i1.p1
55599at6656	TRUE	39	97.5	FBpp0071142	TRINITY_DN13853_c0_g2_i1.p1	TRINITY_DN34543_c1_g1_i1.p3	TRINITY_DN52351_c4_g1_i2.p1	c99030_g1_i1.p1	SMAR014138-PA	TRINITY_DN24242_c0_g1_i1.p1	TRINITY_DN31679_c0_g1_i1.p1	TRINITY_DN11189_c0_g1_i1.p1	TRINITY_DN7453_c0_g2_i3.p1	TRINITY_DN26324_c0_g1_i2.p1	TRINITY_DN17959_c0_g1_i1.p1	TRINITY_DN12903_c0_g1_i1.p1	TRINITY_DN20077_c0_g1_i1.p1	TRINITY_DN10151_c0_g1_i1.p1	TRINITY_DN93711_c0_g1_i1.p1	TRINITY_DN25937_c0_g1_i3.p1	TRINITY_DN59988_c0_g1_i1.p1	TRINITY_DN77325_c1_g2_i1.p1	TRINITY_DN28560_c0_g1_i1.p1		TRINITY_DN3114_c0_g1_i3.p1	TRINITY_DN5070_c0_g1_i2.p1	TRINITY_DN13578_c0_g1_i1.p1	TRINITY_DN22674_c0_g1_i1.p1	TRINITY_DN64220_c0_g1_i1.p1	TRINITY_DN2766_c0_g1_i3.p1	TRINITY_DN1845_c0_g1_i3.p1	TRINITY_DN4349_c0_g1_i8.p1	TRINITY_DN1212_c1_g1_i2.p1	TRINITY_DN14163_c0_g1_i2.p1	TRINITY_DN6473_c0_g1_i1.p1	TRINITY_DN13292_c0_g1_i1.p1	TRINITY_DN22857_c0_g1_i1.p1	TRINITY_DN24952_c0_g1_i4.p1	TRINITY_DN2549_c0_g1_i2.p1	TRINITY_DN19824_c0_g1_i1.p1	TRINITY_DN26892_c0_g1_i1.p1	TRINITY_DN85028_c0_g1_i1.p1	TRINITY_DN11052_c0_g1_i1.p1
60067at6656	FALSE	39	97.5	FBpp0082903	TRINITY_DN13562_c0_g1_i1.p1	TRINITY_DN44277_c0_g1_i1.p1	TRINITY_DN52812_c0_g1_i1.p1	c100992_g1_i1.p1	SMAR014058-PA	TRINITY_DN23450_c0_g2_i1.p2	TRINITY_DN13645_c0_g1_i1.p1	TRINITY_DN27666_c0_g1_i1.p1	TRINITY_DN7461_c0_g1_i3.p1	TRINITY_DN8621_c0_g1_i1.p1	TRINITY_DN34497_c0_g1_i1.p1	TRINITY_DN18060_c0_g1_i1.p2	TRINITY_DN3574_c0_g1_i1.p1	TRINITY_DN13426_c0_g1_i1.p1	TRINITY_DN29902_c0_g1_i1.p1	TRINITY_DN32386_c0_g1_i2.p1	TRINITY_DN71463_c1_g1_i4.p1	TRINITY_DN81039_c1_g1_i1.p1	TRINITY_DN21583_c0_g2_i1.p1		TRINITY_DN1810_c0_g1_i3.p1	TRINITY_DN39848_c0_g1_i1.p1	TRINITY_DN5086_c1_g1_i3.p1	TRINITY_DN6928_c0_g1_i1.p1	TRINITY_DN42356_c0_g1_i1.p1	TRINITY_DN10356_c2_g1_i4.p1	TRINITY_DN7158_c0_g1_i7.p1	TRINITY_DN10129_c0_g1_i1.p2	TRINITY_DN2372_c0_g2_i4.p1	TRINITY_DN1028_c0_g1_i1.p1	TRINITY_DN7025_c0_g1_i10.p1	TRINITY_DN3722_c0_g1_i6.p1	TRINITY_DN14995_c0_g1_i1.p1	TRINITY_DN2924_c0_g1_i1.p1	TRINITY_DN7545_c0_g1_i1.p1	TRINITY_DN27660_c0_g1_i1.p1	TRINITY_DN29663_c1_g1_i1.p1	TRINITY_DN86079_c0_g1_i1.p1	TRINITY_DN16278_c0_g1_i1.p1
63193at6656	FALSE	39	97.5	FBpp0080395	TRINITY_DN19435_c1_g7_i1.p1	TRINITY_DN49675_c0_g1_i1.p1	TRINITY_DN52830_c0_g2_i1.p1	c84777_g1_i1.p1	SMAR010968-PA	TRINITY_DN17139_c0_g1_i1.p1	TRINITY_DN43339_c5_g12_i1.p1	TRINITY_DN6959_c0_g1_i2.p2	TRINITY_DN2651_c0_g1_i1.p1	TRINITY_DN2476_c0_g1_i1.p1	TRINITY_DN3273_c0_g1_i1.p1	TRINITY_DN1095_c0_g1_i1.p1		TRINITY_DN2921_c0_g2_i1.p1	TRINITY_DN18483_c0_g1_i1.p1	TRINITY_DN31632_c1_g2_i1.p1	TRINITY_DN7393_c0_g2_i1.p1	TRINITY_DN71972_c0_g1_i1.p1	TRINITY_DN42019_c0_g1_i1.p1	TRINITY_DN10609_c0_g1_i1.p1	TRINITY_DN2010_c1_g1_i2.p1	TRINITY_DN5047_c0_g1_i1.p1	TRINITY_DN2998_c0_g1_i1.p1	TRINITY_DN182_c1_g1_i2.p1	TRINITY_DN1859_c0_g1_i7.p1	TRINITY_DN1976_c0_g1_i17.p1	TRINITY_DN26687_c0_g1_i1.p1	TRINITY_DN387_c0_g1_i3.p1	TRINITY_DN1512_c0_g1_i3.p1	TRINITY_DN14675_c0_g1_i2.p1	TRINITY_DN1883_c0_g1_i1.p1	TRINITY_DN1178_c0_g1_i7.p1	TRINITY_DN1115_c0_g1_i5.p1	TRINITY_DN1499_c0_g2_i2.p1	TRINITY_DN786_c0_g1_i4.p1	TRINITY_DN14625_c0_g1_i1.p1	TRINITY_DN13800_c0_g2_i1.p1	TRINITY_DN90180_c1_g1_i1.p1	TRINITY_DN7815_c0_g1_i1.p1
66597at6656	FALSE	39	97.5	FBpp0081552	TRINITY_DN10307_c0_g1_i1.p1	TRINITY_DN7895_c0_g1_i1.p1	TRINITY_DN43280_c0_g1_i1.p1	c61518_g1_i1.p1	SMAR005523-PA	TRINITY_DN25527_c0_g3_i1.p1	TRINITY_DN37258_c0_g1_i1.p1	TRINITY_DN17_c0_g1_i7.p1	TRINITY_DN23573_c0_g1_i1.p1	TRINITY_DN1028_c0_g1_i3.p1	TRINITY_DN28391_c0_g1_i2.p1	TRINITY_DN6926_c0_g1_i1.p1	TRINITY_DN15564_c0_g1_i2.p1	TRINITY_DN2470_c0_g1_i1.p1	TRINITY_DN30973_c0_g1_i1.p1	TRINITY_DN28987_c0_g1_i1.p1	TRINITY_DN69406_c0_g2_i2.p1	TRINITY_DN77924_c0_g2_i1.p1		TRINITY_DN48609_c0_g1_i2.p1	TRINITY_DN7985_c0_g1_i1.p1	TRINITY_DN39720_c0_g1_i1.p1	TRINITY_DN3350_c1_g1_i1.p1	TRINITY_DN23089_c0_g1_i2.p1	TRINITY_DN71897_c0_g1_i1.p1	TRINITY_DN10381_c0_g1_i1.p1	TRINITY_DN1249_c0_g1_i1.p1	TRINITY_DN3332_c0_g1_i1.p1	TRINITY_DN8365_c0_g1_i4.p1	TRINITY_DN1608_c0_g1_i23.p1	TRINITY_DN4707_c0_g1_i1.p1	TRINITY_DN8017_c1_g1_i2.p1	TRINITY_DN11127_c0_g1_i1.p1	TRINITY_DN2570_c0_g1_i4.p1	TRINITY_DN202_c0_g1_i1.p1	TRINITY_DN19263_c0_g1_i1.p1	TRINITY_DN29663_c1_g2_i2.p1	TRINITY_DN89932_c0_g3_i1.p1	TRINITY_DN2065_c0_g1_i1.p1
68468at6656	FALSE	39	97.5	FBpp0070992	TRINITY_DN18237_c0_g1_i1.p1	TRINITY_DN25788_c0_g1_i1.p1	TRINITY_DN36240_c0_g1_i1.p1	c87633_g1_i1.p1	SMAR009812-PA	TRINITY_DN26602_c0_g1_i1.p1	TRINITY_DN41421_c0_g1_i1.p1	TRINITY_DN38373_c0_g1_i1.p1	TRINITY_DN4736_c0_g1_i1.p1	TRINITY_DN7630_c0_g1_i1.p1	TRINITY_DN4809_c0_g1_i5.p1	TRINITY_DN2417_c0_g1_i1.p1	TRINITY_DN10362_c1_g1_i1.p1	TRINITY_DN936_c0_g1_i1.p1	TRINITY_DN27470_c0_g1_i2.p1	TRINITY_DN15859_c0_g1_i1.p1	TRINITY_DN69450_c0_g1_i1.p1	TRINITY_DN45624_c0_g1_i1.p1	TRINITY_DN22777_c0_g1_i1.p1		TRINITY_DN9431_c0_g1_i4.p1	TRINITY_DN5555_c0_g1_i3.p1	TRINITY_DN4189_c0_g1_i1.p1	TRINITY_DN2119_c0_g1_i1.p1	TRINITY_DN51623_c0_g1_i1.p1	TRINITY_DN65063_c0_g1_i1.p1	TRINITY_DN3595_c0_g2_i1.p1	TRINITY_DN4120_c0_g1_i1.p1	TRINITY_DN18902_c0_g1_i1.p1	TRINITY_DN32016_c0_g1_i7.p1	TRINITY_DN13549_c0_g1_i1.p1	TRINITY_DN1569_c0_g1_i7.p1	TRINITY_DN2051_c0_g1_i2.p1	TRINITY_DN4621_c0_g1_i14.p1	TRINITY_DN2842_c0_g1_i2.p1	TRINITY_DN5620_c0_g1_i1.p1	TRINITY_DN27580_c1_g1_i1.p1	TRINITY_DN33035_c0_g1_i1.p1	TRINITY_DN10622_c0_g2_i1.p1
68961at6656	TRUE	39	97.5	FBpp0087152	TRINITY_DN16593_c0_g3_i2.p1	TRINITY_DN22397_c0_g1_i1.p1	TRINITY_DN50730_c0_g1_i1.p1	c90659_g1_i2.p2	SMAR006199-PA	TRINITY_DN24067_c0_g1_i1.p1	TRINITY_DN43105_c2_g1_i1.p1	TRINITY_DN20116_c0_g1_i1.p1	TRINITY_DN6690_c0_g1_i2.p2	TRINITY_DN5615_c0_g1_i2.p1	TRINITY_DN23072_c0_g1_i2.p1	TRINITY_DN36360_c0_g1_i1.p1		TRINITY_DN2912_c0_g1_i2.p1	TRINITY_DN5793_c0_g1_i1.p1	TRINITY_DN27224_c0_g1_i1.p1	TRINITY_DN67461_c0_g1_i1.p1	TRINITY_DN88073_c6_g3_i2.p1	TRINITY_DN43473_c0_g1_i1.p1	TRINITY_DN19513_c0_g1_i1.p1	TRINITY_DN11304_c0_g2_i1.p1	TRINITY_DN11068_c0_g1_i2.p1	TRINITY_DN17703_c0_g1_i1.p1	TRINITY_DN3755_c0_g1_i1.p2	TRINITY_DN32808_c0_g1_i1.p1	TRINITY_DN2818_c0_g1_i4.p1	TRINITY_DN11288_c3_g1_i1.p1	TRINITY_DN9399_c0_g1_i2.p1	TRINITY_DN1615_c0_g1_i10.p1	TRINITY_DN718_c0_g2_i1.p1	TRINITY_DN916_c0_g1_i1.p1	TRINITY_DN532_c0_g2_i2.p1	TRINITY_DN1962_c1_g1_i1.p1	TRINITY_DN5159_c0_g1_i1.p1	TRINITY_DN22447_c0_g1_i1.p1	TRINITY_DN24486_c0_g1_i2.p1	TRINITY_DN30188_c0_g1_i1.p1	TRINITY_DN90584_c6_g5_i1.p1	TRINITY_DN8871_c0_g1_i1.p1
73456at6656	TRUE	39	97.5	FBpp0298292	TRINITY_DN18526_c0_g1_i1.p1	TRINITY_DN33187_c0_g1_i1.p1	TRINITY_DN49755_c0_g1_i4.p1	c94652_g1_i1.p1	SMAR015283-PA	TRINITY_DN25474_c0_g3_i1.p1	TRINITY_DN39503_c2_g1_i1.p1	TRINITY_DN1586_c0_g1_i3.p1	TRINITY_DN92_c0_g1_i1.p1	TRINITY_DN697_c1_g1_i3.p1	TRINITY_DN3096_c0_g1_i2.p1	TRINITY_DN495_c0_g1_i2.p1		TRINITY_DN3330_c0_g1_i1.p1	TRINITY_DN23590_c0_g1_i1.p1	TRINITY_DN24621_c5_g1_i1.p1	TRINITY_DN29439_c0_g1_i1.p1	TRINITY_DN86733_c1_g1_i1.p1	TRINITY_DN46803_c2_g1_i1.p1	TRINITY_DN34762_c0_g1_i1.p1	TRINITY_DN103_c2_g1_i2.p1	TRINITY_DN33344_c0_g1_i1.p1	TRINITY_DN393_c0_g1_i3.p1	TRINITY_DN454_c0_g1_i2.p1	TRINITY_DN377_c0_g1_i1.p1	TRINITY_DN520_c0_g1_i15.p1	TRINITY_DN104_c0_g2_i1.p1	TRINITY_DN1050_c0_g1_i4.p1	TRINITY_DN97_c0_g1_i2.p1	TRINITY_DN4341_c0_g2_i1.p1	TRINITY_DN1864_c0_g2_i2.p1	TRINITY_DN7745_c0_g1_i3.p1	TRINITY_DN1767_c1_g1_i2.p1	TRINITY_DN1772_c0_g1_i4.p1	TRINITY_DN2150_c0_g1_i4.p1	TRINITY_DN24250_c0_g1_i1.p1	TRINITY_DN29227_c0_g1_i2.p1	TRINITY_DN90495_c0_g3_i1.p1	TRINITY_DN13085_c10_g1_i1.p1
69238at6656	FALSE	39	97.5	FBpp0082328	TRINITY_DN19079_c10_g5_i1.p1	TRINITY_DN56289_c0_g1_i1.p1	TRINITY_DN48767_c0_g1_i1.p1	c95738_g1_i3.p1	SMAR014614-PA	TRINITY_DN17155_c0_g2_i1.p1	TRINITY_DN5583_c0_g2_i1.p1	TRINITY_DN15612_c0_g1_i1.p1	TRINITY_DN9786_c0_g1_i1.p1	TRINITY_DN7362_c0_g1_i1.p1	TRINITY_DN1365_c0_g1_i1.p1	TRINITY_DN1308_c0_g1_i5.p1	TRINITY_DN50631_c0_g1_i1.p1	TRINITY_DN1675_c0_g1_i6.p1	TRINITY_DN18067_c0_g1_i1.p1	TRINITY_DN32626_c2_g1_i2.p1	TRINITY_DN61286_c0_g1_i1.p1	TRINITY_DN76714_c0_g2_i2.p1	TRINITY_DN186_c0_g1_i1.p1		TRINITY_DN7183_c0_g2_i1.p1	TRINITY_DN23187_c0_g1_i1.p1	TRINITY_DN3409_c0_g1_i2.p1	TRINITY_DN1259_c0_g1_i1.p1	TRINITY_DN84798_c0_g1_i1.p1	TRINITY_DN4297_c0_g1_i7.p3	TRINITY_DN14390_c0_g1_i1.p1	TRINITY_DN8880_c0_g1_i2.p1	TRINITY_DN3650_c0_g1_i1.p1	TRINITY_DN2666_c0_g2_i6.p1	TRINITY_DN2540_c0_g2_i1.p1	TRINITY_DN13715_c0_g1_i5.p1	TRINITY_DN2919_c0_g1_i4.p1	TRINITY_DN5616_c3_g1_i2.p1	TRINITY_DN1758_c0_g1_i1.p1	TRINITY_DN22376_c0_g1_i1.p1	TRINITY_DN27659_c0_g3_i8.p1	TRINITY_DN137666_c0_g1_i1.p1	TRINITY_DN10302_c0_g1_i1.p1
84819at6656	TRUE	39	97.5	FBpp0305666	TRINITY_DN12437_c0_g3_i1.p1	TRINITY_DN32425_c0_g1_i4.p1	TRINITY_DN49843_c0_g1_i1.p1	c73678_g1_i1.p1	SMAR015044-PA	TRINITY_DN26309_c0_g2_i1.p1	TRINITY_DN37904_c0_g1_i1.p1	TRINITY_DN10388_c1_g2_i2.p1	TRINITY_DN7428_c0_g1_i3.p1	TRINITY_DN27263_c0_g1_i1.p1	TRINITY_DN9140_c0_g1_i1.p1	TRINITY_DN34719_c0_g1_i1.p1	TRINITY_DN24970_c0_g1_i1.p1	TRINITY_DN22147_c0_g1_i1.p1	TRINITY_DN10431_c0_g1_i1.p1	TRINITY_DN30181_c0_g1_i2.p1	TRINITY_DN115654_c0_g1_i1.p1	TRINITY_DN83436_c0_g2_i4.p1	TRINITY_DN53906_c0_g1_i1.p1	TRINITY_DN37328_c0_g1_i1.p1	TRINITY_DN79_c1_g1_i2.p1		TRINITY_DN1698_c0_g1_i2.p1	TRINITY_DN3721_c0_g1_i2.p2	TRINITY_DN38346_c0_g1_i1.p1	TRINITY_DN411_c0_g1_i1.p1	TRINITY_DN2732_c0_g1_i6.p1	TRINITY_DN6389_c0_g1_i3.p1	TRINITY_DN2483_c0_g1_i3.p1	TRINITY_DN2035_c0_g1_i1.p1	TRINITY_DN2556_c0_g1_i3.p1	TRINITY_DN4_c1_g2_i1.p1	TRINITY_DN162_c0_g1_i3.p1	TRINITY_DN3449_c0_g1_i1.p1	TRINITY_DN1768_c0_g1_i3.p1	TRINITY_DN25909_c0_g3_i2.p2	TRINITY_DN34469_c0_g1_i1.p1	TRINITY_DN90345_c2_g1_i1.p1	TRINITY_DN10709_c0_g2_i1.p1
69897at6656	FALSE	38	95	FBpp0306828	TRINITY_DN18479_c0_g1_i4.p1	TRINITY_DN27936_c0_g1_i1.p1	TRINITY_DN50443_c0_g1_i1.p1	c90801_g7_i1.p1	SMAR006067-PA	TRINITY_DN26195_c0_g5_i3.p1	TRINITY_DN41180_c0_g2_i5.p1	TRINITY_DN3958_c0_g1_i1.p1	TRINITY_DN11477_c0_g1_i1.p1	TRINITY_DN822_c0_g1_i1.p1	TRINITY_DN826_c0_g1_i4.p1	TRINITY_DN15805_c0_g1_i2.p1	TRINITY_DN8800_c0_g1_i1.p1	TRINITY_DN1821_c0_g1_i1.p1	TRINITY_DN29785_c0_g1_i1.p1	TRINITY_DN25431_c3_g1_i1.p1	TRINITY_DN72073_c0_g1_i1.p1	TRINITY_DN84744_c0_g1_i1.p1		TRINITY_DN68528_c0_g1_i1.p1	TRINITY_DN1646_c0_g1_i1.p1		TRINITY_DN5734_c0_g1_i11.p1	TRINITY_DN5701_c1_g1_i2.p1	TRINITY_DN18527_c0_g1_i3.p1	TRINITY_DN2684_c0_g1_i1.p1	TRINITY_DN12939_c0_g1_i3.p1	TRINITY_DN1425_c0_g1_i4.p1	TRINITY_DN141_c0_g1_i1.p1	TRINITY_DN1908_c0_g1_i9.p1	TRINITY_DN1799_c0_g1_i5.p1	TRINITY_DN315_c0_g1_i16.p1	TRINITY_DN171_c2_g3_i1.p1	TRINITY_DN4598_c0_g1_i2.p1	TRINITY_DN23127_c0_g1_i1.p1	TRINITY_DN20399_c0_g1_i1.p1	TRINITY_DN30903_c0_g1_i2.p1	TRINITY_DN91512_c2_g13_i1.p1	TRINITY_DN13222_c13_g2_i1.p1
86654at6656	TRUE	39	97.5	FBpp0088585	TRINITY_DN16050_c0_g1_i2.p1	TRINITY_DN3700_c0_g1_i1.p1	TRINITY_DN51510_c1_g1_i1.p1	c99939_g2_i1.p1	SMAR005087-PA	TRINITY_DN24373_c0_g3_i1.p1	TRINITY_DN88236_c0_g1_i1.p1	TRINITY_DN4808_c0_g1_i1.p1	TRINITY_DN4177_c0_g1_i1.p1	TRINITY_DN1006_c1_g3_i1.p1	TRINITY_DN2686_c0_g1_i1.p1	TRINITY_DN2765_c0_g1_i1.p1	TRINITY_DN52553_c0_g1_i1.p1	TRINITY_DN5097_c0_g1_i2.p1	TRINITY_DN52259_c0_g1_i1.p1	TRINITY_DN27161_c0_g1_i2.p1	TRINITY_DN72087_c0_g1_i4.p1	TRINITY_DN51335_c0_g1_i1.p1	TRINITY_DN39890_c0_g3_i1.p1		TRINITY_DN9304_c0_g1_i1.p1	TRINITY_DN30697_c0_g1_i1.p1	TRINITY_DN19388_c0_g1_i1.p1	TRINITY_DN5296_c0_g2_i2.p1	TRINITY_DN3399_c0_g1_i1.p1	TRINITY_DN42348_c0_g1_i1.p1	TRINITY_DN7293_c0_g1_i1.p1	TRINITY_DN6114_c1_g1_i4.p1	TRINITY_DN3357_c0_g1_i2.p1	TRINITY_DN14872_c0_g1_i1.p1	TRINITY_DN14180_c0_g1_i2.p1	TRINITY_DN55903_c0_g1_i1.p1	TRINITY_DN695_c0_g3_i5.p1	TRINITY_DN5590_c0_g1_i2.p1	TRINITY_DN4146_c0_g1_i1.p1	TRINITY_DN19019_c0_g1_i1.p1	TRINITY_DN20385_c0_g2_i1.p1	TRINITY_DN90771_c2_g3_i3.p1	TRINITY_DN12592_c1_g1_i1.p1
75982at6656	FALSE	39	97.5	FBpp0083415	TRINITY_DN5692_c0_g2_i1.p1	TRINITY_DN34277_c0_g1_i1.p2	TRINITY_DN46755_c0_g1_i1.p1	c83757_g1_i1.p1	SMAR008154-PA	TRINITY_DN25828_c0_g1_i1.p1	TRINITY_DN28600_c0_g1_i1.p1	TRINITY_DN8895_c0_g1_i1.p1	TRINITY_DN22710_c0_g1_i1.p1	TRINITY_DN3959_c0_g1_i4.p1	TRINITY_DN659_c0_g1_i2.p1	TRINITY_DN12154_c0_g1_i1.p1	TRINITY_DN22349_c0_g1_i1.p1	TRINITY_DN10874_c0_g1_i1.p1		TRINITY_DN31076_c8_g5_i1.p1	TRINITY_DN68807_c0_g3_i2.p1	TRINITY_DN69802_c0_g1_i1.p1	TRINITY_DN22873_c0_g1_i1.p1	TRINITY_DN7371_c1_g1_i1.p1	TRINITY_DN1240_c0_g1_i2.p1	TRINITY_DN23260_c0_g1_i1.p1	TRINITY_DN793_c0_g1_i2.p2	TRINITY_DN16255_c0_g1_i2.p1	TRINITY_DN4827_c0_g1_i1.p1	TRINITY_DN6033_c0_g1_i1.p1	TRINITY_DN4828_c0_g1_i4.p2	TRINITY_DN1441_c0_g1_i2.p1	TRINITY_DN2147_c0_g1_i5.p1	TRINITY_DN2226_c0_g1_i1.p1	TRINITY_DN11390_c0_g1_i1.p1	TRINITY_DN4986_c0_g1_i5.p1	TRINITY_DN3173_c0_g1_i2.p1	TRINITY_DN4234_c0_g1_i4.p1	TRINITY_DN13546_c0_g1_i1.p1	TRINITY_DN25431_c0_g1_i2.p1	TRINITY_DN20206_c0_g3_i1.p1	TRINITY_DN90010_c0_g1_i1.p1	TRINITY_DN1634_c0_g1_i1.p1
91313at6656	TRUE	39	97.5	FBpp0081011	TRINITY_DN13858_c0_g2_i2.p1	TRINITY_DN28532_c0_g2_i1.p1	TRINITY_DN49809_c0_g1_i2.p2	c94356_g3_i5.p1	SMAR007495-PA	TRINITY_DN28521_c0_g1_i1.p1	TRINITY_DN10094_c0_g1_i1.p1	TRINITY_DN3749_c0_g1_i2.p1	TRINITY_DN6214_c0_g1_i2.p1	TRINITY_DN8565_c0_g1_i1.p1	TRINITY_DN32736_c0_g1_i1.p1	TRINITY_DN4923_c0_g1_i2.p1	TRINITY_DN38158_c0_g1_i1.p1	TRINITY_DN30820_c0_g1_i1.p1	TRINITY_DN23560_c0_g1_i1.p1	TRINITY_DN26026_c1_g1_i1.p1	TRINITY_DN73656_c11_g1_i5.p1	TRINITY_DN76869_c4_g2_i1.p1	TRINITY_DN78956_c0_g1_i1.p1		TRINITY_DN1417_c0_g3_i1.p1	TRINITY_DN3501_c0_g1_i2.p1	TRINITY_DN5517_c0_g1_i2.p1	TRINITY_DN5909_c0_g1_i3.p1	TRINITY_DN86843_c0_g1_i1.p1	TRINITY_DN20021_c0_g1_i1.p1	TRINITY_DN1019_c4_g1_i1.p1	TRINITY_DN9252_c0_g1_i5.p1	TRINITY_DN5208_c0_g1_i2.p1	TRINITY_DN1007_c0_g1_i5.p2	TRINITY_DN3888_c0_g1_i1.p1	TRINITY_DN30824_c0_g1_i1.p1	TRINITY_DN3492_c0_g1_i3.p1	TRINITY_DN8850_c0_g1_i1.p1	TRINITY_DN1721_c0_g1_i1.p2	TRINITY_DN23994_c0_g1_i1.p1	TRINITY_DN25707_c0_g1_i1.p1	TRINITY_DN85801_c0_g1_i1.p1	TRINITY_DN11074_c2_g1_i1.p1
91933at6656	TRUE	39	97.5	FBpp0071365	TRINITY_DN14582_c0_g1_i1.p1	TRINITY_DN1490_c0_g1_i1.p1	TRINITY_DN43968_c0_g1_i1.p1	c83535_g2_i2.p1	SMAR008431-PA	TRINITY_DN3756_c0_g1_i1.p1	TRINITY_DN27491_c0_g1_i1.p1	TRINITY_DN7957_c0_g2_i1.p1	TRINITY_DN15445_c0_g1_i1.p1	TRINITY_DN4060_c0_g1_i1.p1	TRINITY_DN28829_c0_g1_i1.p1	TRINITY_DN16385_c0_g1_i2.p1	TRINITY_DN52775_c0_g1_i2.p1	TRINITY_DN10306_c0_g1_i1.p1	TRINITY_DN20139_c0_g1_i1.p1	TRINITY_DN23134_c0_g2_i1.p1	TRINITY_DN67005_c0_g1_i1.p1	TRINITY_DN83900_c1_g1_i2.p1	TRINITY_DN32665_c0_g1_i2.p1		TRINITY_DN2297_c0_g1_i2.p1	TRINITY_DN8472_c0_g1_i2.p1	TRINITY_DN14651_c0_g1_i1.p1	TRINITY_DN6686_c2_g1_i1.p1	TRINITY_DN89123_c0_g1_i1.p1	TRINITY_DN9111_c0_g1_i2.p1	TRINITY_DN1962_c0_g1_i1.p1	TRINITY_DN606_c0_g1_i2.p1	TRINITY_DN28866_c0_g1_i1.p1	TRINITY_DN4689_c0_g1_i1.p1	TRINITY_DN3033_c0_g1_i3.p2	TRINITY_DN3299_c0_g1_i14.p2	TRINITY_DN1246_c0_g1_i1.p1	TRINITY_DN9696_c0_g1_i1.p1	TRINITY_DN4028_c0_g1_i2.p1	TRINITY_DN24144_c0_g1_i1.p1	TRINITY_DN15172_c0_g2_i1.p1	TRINITY_DN73420_c0_g1_i1.p1	TRINITY_DN12045_c0_g1_i1.p1
997at6656	TRUE	39	97.5	FBpp0087124	TRINITY_DN19346_c0_g3_i1.p1	TRINITY_DN25595_c0_g2_i1.p1	TRINITY_DN52785_c1_g1_i1.p1	c99952_g1_i1.p1	SMAR008823-PA	TRINITY_DN28872_c0_g2_i1.p1	TRINITY_DN41218_c1_g1_i1.p1	TRINITY_DN4448_c0_g1_i1.p1	TRINITY_DN1845_c0_g1_i1.p1	TRINITY_DN15420_c0_g1_i2.p1	TRINITY_DN27801_c0_g1_i1.p1	TRINITY_DN34264_c0_g1_i1.p1		TRINITY_DN8417_c0_g2_i1.p1	TRINITY_DN85120_c0_g1_i1.p1	TRINITY_DN33352_c0_g1_i2.p1	TRINITY_DN67400_c0_g1_i1.p1	TRINITY_DN81081_c0_g1_i4.p1	TRINITY_DN71128_c0_g1_i1.p1	TRINITY_DN78498_c0_g1_i1.p1	TRINITY_DN7273_c0_g1_i7.p1	TRINITY_DN23717_c0_g1_i1.p1	TRINITY_DN4600_c0_g2_i2.p1	TRINITY_DN28292_c0_g1_i1.p1	TRINITY_DN7529_c0_g1_i1.p1	TRINITY_DN11450_c0_g2_i4.p1	TRINITY_DN5014_c0_g1_i3.p1	TRINITY_DN2993_c0_g1_i5.p1	TRINITY_DN2946_c1_g1_i2.p1	TRINITY_DN1011_c0_g1_i4.p1	TRINITY_DN28101_c0_g1_i1.p1	TRINITY_DN5818_c0_g1_i4.p1	TRINITY_DN22225_c0_g1_i1.p1	TRINITY_DN2296_c0_g1_i12.p2	TRINITY_DN17965_c0_g1_i1.p1	TRINITY_DN21903_c0_g1_i1.p1	TRINITY_DN31989_c0_g1_i7.p1	TRINITY_DN92671_c0_g4_i3.p1	TRINITY_DN9950_c0_g1_i1.p1
100612at6656	TRUE	39	97.5	FBpp0082916	TRINITY_DN21710_c0_g1_i1.p1	TRINITY_DN20446_c0_g1_i1.p1	TRINITY_DN46659_c1_g1_i1.p1	c83095_g1_i1.p2	SMAR012906-PA	TRINITY_DN22236_c0_g1_i1.p1	TRINITY_DN19285_c0_g1_i1.p1	TRINITY_DN25805_c0_g1_i1.p1	TRINITY_DN4890_c0_g1_i1.p1	TRINITY_DN2014_c0_g1_i2.p1	TRINITY_DN839_c0_g1_i3.p2	TRINITY_DN5383_c0_g1_i3.p1	TRINITY_DN29254_c0_g1_i1.p1	TRINITY_DN1440_c0_g1_i3.p1	TRINITY_DN30467_c0_g1_i1.p1	TRINITY_DN32515_c1_g1_i2.p2	TRINITY_DN59141_c0_g2_i1.p1	TRINITY_DN78424_c0_g3_i1.p1	TRINITY_DN45016_c0_g1_i3.p1		TRINITY_DN739_c2_g1_i1.p1	TRINITY_DN31074_c0_g1_i1.p1	TRINITY_DN1726_c0_g1_i1.p1	TRINITY_DN6436_c0_g1_i1.p1	TRINITY_DN8713_c0_g1_i2.p1	TRINITY_DN5327_c0_g1_i3.p1	TRINITY_DN12192_c0_g1_i1.p1	TRINITY_DN4041_c0_g1_i2.p1	TRINITY_DN5226_c0_g1_i1.p2	TRINITY_DN20079_c0_g1_i1.p1	TRINITY_DN3557_c0_g1_i2.p2	TRINITY_DN9058_c0_g1_i25.p1	TRINITY_DN941_c0_g1_i10.p4	TRINITY_DN5892_c1_g1_i1.p1	TRINITY_DN19124_c0_g1_i1.p1	TRINITY_DN28970_c0_g1_i1.p1	TRINITY_DN24447_c0_g1_i1.p1	TRINITY_DN66845_c0_g1_i1.p1	TRINITY_DN14782_c0_g1_i1.p1
101727at6656	TRUE	39	97.5	FBpp0070317		TRINITY_DN44681_c0_g1_i1.p1	TRINITY_DN52061_c0_g2_i12.p2	c83562_g1_i1.p1	SMAR011078-PA	TRINITY_DN25549_c0_g1_i1.p1	TRINITY_DN108978_c0_g1_i1.p1	TRINITY_DN5398_c0_g1_i3.p1	TRINITY_DN3906_c0_g1_i1.p1	TRINITY_DN4517_c0_g1_i1.p1	TRINITY_DN27151_c0_g1_i1.p1	TRINITY_DN9528_c0_g1_i2.p1	TRINITY_DN3449_c0_g1_i1.p1	TRINITY_DN3409_c0_g1_i2.p1	TRINITY_DN8986_c0_g1_i1.p1	TRINITY_DN147_c0_g1_i1.p1	TRINITY_DN67202_c0_g2_i2.p1	TRINITY_DN78749_c0_g2_i3.p1	TRINITY_DN45441_c0_g1_i3.p1	TRINITY_DN67490_c0_g1_i1.p1	TRINITY_DN5056_c0_g2_i1.p1	TRINITY_DN6542_c0_g1_i2.p1	TRINITY_DN21961_c0_g1_i1.p1	TRINITY_DN28993_c0_g1_i1.p1	TRINITY_DN87656_c0_g1_i1.p1	TRINITY_DN34403_c0_g1_i1.p1	TRINITY_DN8553_c0_g1_i1.p1	TRINITY_DN9922_c0_g1_i1.p1	TRINITY_DN1985_c0_g1_i8.p1	TRINITY_DN1552_c0_g1_i5.p1	TRINITY_DN1955_c0_g1_i1.p2	TRINITY_DN11830_c0_g1_i2.p1	TRINITY_DN1112_c0_g1_i19.p2	TRINITY_DN41811_c0_g1_i1.p1	TRINITY_DN6063_c0_g1_i2.p1	TRINITY_DN15456_c0_g1_i2.p1	TRINITY_DN30906_c1_g6_i8.p1	TRINITY_DN89129_c0_g2_i2.p1	TRINITY_DN12996_c0_g1_i2.p1
104604at6656	TRUE	39	97.5	FBpp0085258	TRINITY_DN15848_c0_g1_i1.p1	TRINITY_DN9900_c0_g1_i1.p1	TRINITY_DN51814_c0_g1_i2.p1	c98420_g1_i3.p1	SMAR005765-PA	TRINITY_DN24762_c0_g3_i1.p1	TRINITY_DN4795_c0_g1_i1.p1	TRINITY_DN3294_c0_g1_i1.p1	TRINITY_DN5887_c0_g1_i1.p1	TRINITY_DN31251_c0_g1_i1.p1	TRINITY_DN21959_c0_g1_i1.p1	TRINITY_DN40813_c0_g1_i1.p1	TRINITY_DN32549_c0_g1_i1.p1	TRINITY_DN26680_c0_g1_i1.p1	TRINITY_DN2451_c0_g1_i1.p1	TRINITY_DN33140_c0_g1_i5.p1	TRINITY_DN116979_c0_g1_i1.p1	TRINITY_DN83312_c1_g1_i6.p1	TRINITY_DN40034_c1_g2_i1.p1		TRINITY_DN5323_c0_g2_i1.p1	TRINITY_DN40102_c0_g1_i1.p1	TRINITY_DN2189_c0_g1_i1.p1	TRINITY_DN4057_c0_g2_i2.p3	TRINITY_DN37967_c0_g1_i1.p1	TRINITY_DN22204_c0_g1_i1.p1	TRINITY_DN6655_c0_g2_i3.p1	TRINITY_DN20434_c3_g1_i1.p1	TRINITY_DN5989_c0_g1_i2.p1	TRINITY_DN2726_c0_g1_i2.p1	TRINITY_DN2155_c0_g1_i1.p1	TRINITY_DN3323_c0_g1_i2.p1	TRINITY_DN1622_c0_g1_i5.p1	TRINITY_DN6627_c0_g3_i1.p1	TRINITY_DN1859_c0_g1_i4.p1	TRINITY_DN11825_c0_g1_i1.p1	TRINITY_DN28717_c0_g1_i1.p1	TRINITY_DN80159_c0_g1_i1.p1	TRINITY_DN11921_c1_g1_i1.p1
113713at6656	TRUE	39	97.5	FBpp0071753	TRINITY_DN15811_c0_g1_i6.p1	TRINITY_DN26356_c0_g1_i1.p1	TRINITY_DN43467_c0_g1_i1.p1	c93993_g1_i1.p1	SMAR015239-PA	TRINITY_DN24322_c0_g3_i1.p1	TRINITY_DN20011_c0_g1_i1.p1	TRINITY_DN19064_c0_g1_i1.p1	TRINITY_DN2451_c0_g1_i2.p1	TRINITY_DN3447_c0_g1_i11.p1	TRINITY_DN5232_c0_g1_i1.p1	TRINITY_DN13437_c0_g1_i1.p1	TRINITY_DN43869_c0_g1_i1.p1	TRINITY_DN8454_c0_g1_i1.p1	TRINITY_DN14871_c0_g2_i1.p1	TRINITY_DN29490_c0_g1_i1.p1	TRINITY_DN71300_c0_g1_i2.p1	TRINITY_DN30335_c0_g1_i1.p1	TRINITY_DN61438_c0_g1_i1.p1		TRINITY_DN9169_c0_g1_i1.p1	TRINITY_DN20264_c0_g1_i1.p1	TRINITY_DN1762_c0_g1_i10.p1	TRINITY_DN1960_c0_g1_i11.p1	TRINITY_DN78637_c0_g1_i1.p1	TRINITY_DN61974_c0_g1_i1.p1	TRINITY_DN2146_c0_g1_i2.p1	TRINITY_DN2177_c0_g1_i1.p1	TRINITY_DN4445_c0_g1_i2.p1	TRINITY_DN14044_c0_g1_i1.p1	TRINITY_DN28837_c0_g1_i1.p1	TRINITY_DN6256_c0_g1_i6.p1	TRINITY_DN536_c0_g1_i5.p2	TRINITY_DN3318_c0_g1_i2.p1	TRINITY_DN26948_c0_g1_i1.p1	TRINITY_DN13032_c0_g1_i1.p1	TRINITY_DN26551_c0_g2_i1.p1	TRINITY_DN72392_c0_g1_i1.p1	TRINITY_DN10691_c0_g1_i1.p1
126733at6656	TRUE	39	97.5	FBpp0079975	TRINITY_DN30174_c0_g1_i1.p1	TRINITY_DN31971_c0_g2_i1.p1	TRINITY_DN49581_c0_g2_i1.p1	c74509_g1_i1.p1	SMAR003782-PA	TRINITY_DN34147_c0_g1_i1.p1	TRINITY_DN32156_c0_g2_i1.p1	TRINITY_DN26622_c0_g1_i1.p1	TRINITY_DN3223_c0_g1_i4.p1	TRINITY_DN5675_c0_g1_i2.p1	TRINITY_DN3154_c0_g1_i1.p1	TRINITY_DN6546_c0_g1_i2.p1	TRINITY_DN15175_c0_g2_i1.p1	TRINITY_DN17899_c0_g1_i1.p1	TRINITY_DN22827_c0_g1_i1.p1	TRINITY_DN28421_c11_g2_i1.p1	TRINITY_DN61946_c0_g1_i1.p1	TRINITY_DN86385_c1_g2_i1.p1	TRINITY_DN42281_c0_g1_i1.p1		TRINITY_DN1255_c5_g1_i1.p1	TRINITY_DN34226_c0_g1_i1.p1	TRINITY_DN3935_c0_g1_i1.p1	TRINITY_DN2336_c0_g1_i1.p1	TRINITY_DN38068_c0_g1_i2.p1	TRINITY_DN20908_c0_g1_i5.p1	TRINITY_DN2745_c0_g1_i1.p1	TRINITY_DN1857_c0_g3_i1.p1	TRINITY_DN3386_c0_g1_i8.p1	TRINITY_DN31342_c0_g1_i1.p2	TRINITY_DN23856_c0_g1_i1.p1	TRINITY_DN1439_c0_g1_i14.p1	TRINITY_DN810_c0_g1_i6.p2	TRINITY_DN5206_c1_g1_i3.p2	TRINITY_DN11321_c0_g1_i1.p1	TRINITY_DN12768_c0_g1_i1.p1	TRINITY_DN27804_c1_g3_i3.p1	TRINITY_DN76386_c0_g1_i1.p1	TRINITY_DN3978_c0_g1_i1.p1
104063at6656	FALSE	39	97.5	FBpp0075425	TRINITY_DN12046_c0_g1_i2.p1	TRINITY_DN32708_c1_g1_i1.p1	TRINITY_DN48802_c0_g1_i1.p1	c86385_g1_i5.p1	SMAR009141-PA	TRINITY_DN21857_c0_g1_i1.p1	TRINITY_DN89582_c0_g1_i1.p1	TRINITY_DN2691_c0_g1_i1.p2	TRINITY_DN483_c1_g1_i1.p1	TRINITY_DN11787_c0_g1_i1.p1	TRINITY_DN6010_c0_g1_i1.p1	TRINITY_DN6967_c0_g1_i1.p1	TRINITY_DN29423_c0_g1_i1.p1	TRINITY_DN2812_c0_g1_i5.p1	TRINITY_DN38367_c0_g1_i1.p1	TRINITY_DN32827_c1_g1_i4.p1	TRINITY_DN284_c0_g1_i1.p1	TRINITY_DN79439_c0_g1_i1.p1		TRINITY_DN35938_c0_g1_i1.p1	TRINITY_DN21501_c0_g1_i1.p1	TRINITY_DN1796_c1_g2_i15.p1	TRINITY_DN22635_c0_g1_i1.p1	TRINITY_DN5017_c0_g1_i2.p1	TRINITY_DN94162_c0_g1_i1.p1	TRINITY_DN10733_c0_g1_i1.p1	TRINITY_DN3065_c0_g1_i16.p1	TRINITY_DN9623_c0_g1_i3.p1	TRINITY_DN2925_c0_g1_i69.p1	TRINITY_DN32719_c0_g1_i4.p1	TRINITY_DN4709_c0_g1_i1.p1	TRINITY_DN8341_c0_g1_i5.p1	TRINITY_DN1170_c0_g1_i41.p1	TRINITY_DN34775_c0_g1_i1.p1	TRINITY_DN7585_c0_g1_i1.p1	TRINITY_DN12936_c0_g1_i1.p1	TRINITY_DN29337_c0_g1_i1.p1	TRINITY_DN91584_c15_g8_i1.p1	TRINITY_DN15670_c0_g1_i1.p1
104198at6656	FALSE	39	97.5	FBpp0075087	TRINITY_DN15597_c0_g4_i1.p1	TRINITY_DN30791_c0_g1_i2.p1	TRINITY_DN49380_c0_g1_i3.p1	c74019_g1_i2.p1	SMAR014429-PA	TRINITY_DN22609_c0_g2_i1.p1	TRINITY_DN26825_c1_g3_i1.p1	TRINITY_DN10292_c0_g1_i1.p1	TRINITY_DN29_c0_g1_i1.p1	TRINITY_DN8270_c0_g1_i2.p1	TRINITY_DN2860_c0_g1_i1.p1	TRINITY_DN15930_c0_g1_i1.p1	TRINITY_DN18784_c0_g1_i2.p1	TRINITY_DN4500_c0_g1_i1.p1	TRINITY_DN15536_c0_g1_i1.p1	TRINITY_DN32393_c1_g1_i2.p1	TRINITY_DN69447_c1_g1_i1.p1	TRINITY_DN84833_c2_g1_i1.p1		TRINITY_DN82524_c0_g1_i1.p1	TRINITY_DN47194_c0_g1_i1.p1	TRINITY_DN46293_c0_g1_i1.p1	TRINITY_DN5706_c0_g1_i1.p1	TRINITY_DN7435_c0_g1_i1.p1	TRINITY_DN50600_c0_g1_i1.p1	TRINITY_DN1610_c0_g1_i1.p1	TRINITY_DN27338_c0_g1_i1.p1	TRINITY_DN48297_c0_g1_i1.p1	TRINITY_DN2464_c1_g1_i1.p1	TRINITY_DN57_c0_g1_i3.p1	TRINITY_DN644_c1_g1_i1.p1	TRINITY_DN1314_c0_g1_i6.p1	TRINITY_DN3821_c0_g1_i3.p1	TRINITY_DN5957_c0_g1_i3.p1	TRINITY_DN13765_c0_g1_i1.p1	TRINITY_DN18855_c0_g1_i1.p1	TRINITY_DN30666_c1_g1_i1.p1	TRINITY_DN85169_c0_g1_i1.p1	TRINITY_DN6808_c0_g1_i1.p1
135702at6656	TRUE	39	97.5	FBpp0083962	TRINITY_DN10016_c0_g3_i1.p1	TRINITY_DN38107_c0_g1_i1.p1	TRINITY_DN49159_c3_g2_i1.p1	c86403_g1_i1.p1		TRINITY_DN25314_c0_g4_i1.p1	TRINITY_DN40909_c1_g4_i1.p1	TRINITY_DN27331_c0_g1_i1.p1	TRINITY_DN6564_c0_g1_i4.p1	TRINITY_DN16330_c0_g1_i1.p1	TRINITY_DN34411_c0_g1_i1.p1	TRINITY_DN29032_c0_g1_i1.p1	TRINITY_DN2347_c0_g1_i1.p1	TRINITY_DN26135_c0_g1_i1.p1	TRINITY_DN61030_c0_g1_i1.p1	TRINITY_DN38283_c0_g1_i1.p1	TRINITY_DN10684_c0_g1_i1.p1	TRINITY_DN75245_c0_g1_i1.p1	TRINITY_DN40527_c0_g1_i1.p1	TRINITY_DN74048_c0_g1_i1.p1	TRINITY_DN12916_c0_g1_i1.p1	TRINITY_DN3434_c0_g1_i1.p1	TRINITY_DN5650_c0_g1_i1.p1	TRINITY_DN2667_c0_g1_i2.p1	TRINITY_DN7830_c0_g1_i2.p1	TRINITY_DN46156_c0_g1_i1.p1	TRINITY_DN4478_c0_g2_i2.p1	TRINITY_DN9067_c0_g1_i5.p1	TRINITY_DN1022_c0_g2_i1.p1	TRINITY_DN9540_c0_g1_i1.p1	TRINITY_DN1212_c0_g1_i4.p1	TRINITY_DN7946_c0_g1_i6.p1	TRINITY_DN5659_c0_g1_i3.p1	TRINITY_DN40496_c0_g1_i1.p1	TRINITY_DN20300_c0_g1_i1.p1	TRINITY_DN25875_c0_g1_i1.p1	TRINITY_DN26693_c1_g1_i1.p2	TRINITY_DN31488_c0_g1_i1.p1	TRINITY_DN13903_c0_g1_i1.p1
110982at6656	FALSE	40	100	FBpp0085954	TRINITY_DN15456_c0_g2_i3.p1	TRINITY_DN32333_c0_g1_i1.p1	TRINITY_DN52614_c1_g1_i1.p1	c87106_g1_i1.p1	SMAR003659-PA	TRINITY_DN16495_c0_g1_i3.p1	TRINITY_DN103964_c0_g1_i1.p1	TRINITY_DN46311_c0_g1_i1.p1	TRINITY_DN8368_c0_g1_i4.p1	TRINITY_DN27606_c0_g1_i1.p1	TRINITY_DN11691_c0_g1_i1.p1	TRINITY_DN23359_c0_g1_i1.p1	TRINITY_DN1744_c0_g1_i2.p1	TRINITY_DN8893_c0_g1_i1.p1	TRINITY_DN23777_c0_g2_i1.p1	TRINITY_DN27555_c0_g1_i2.p1	TRINITY_DN69651_c0_g2_i3.p4	TRINITY_DN38704_c0_g2_i1.p1	TRINITY_DN4269_c0_g1_i1.p1	TRINITY_DN32724_c1_g1_i1.p1	TRINITY_DN6898_c0_g1_i15.p1	TRINITY_DN334_c0_g1_i3.p1	TRINITY_DN3216_c0_g1_i20.p3	TRINITY_DN6790_c0_g1_i4.p2	TRINITY_DN27399_c0_g1_i1.p1	TRINITY_DN34992_c0_g1_i2.p1	TRINITY_DN19347_c0_g1_i3.p1	TRINITY_DN35792_c0_g1_i1.p1	TRINITY_DN582_c0_g1_i103.p1	TRINITY_DN3294_c0_g1_i2.p1	TRINITY_DN18038_c0_g1_i1.p1	TRINITY_DN4782_c0_g1_i1.p1	TRINITY_DN3016_c0_g1_i3.p1	TRINITY_DN8870_c2_g3_i1.p2	TRINITY_DN7575_c0_g1_i1.p1	TRINITY_DN4581_c0_g2_i1.p1	TRINITY_DN27496_c0_g1_i5.p1	TRINITY_DN55877_c0_g1_i1.p1	TRINITY_DN11991_c1_g1_i1.p1
137609at6656	TRUE	39	97.5	FBpp0077173	TRINITY_DN13342_c0_g1_i1.p1	TRINITY_DN25169_c1_g1_i1.p1	TRINITY_DN50916_c0_g1_i1.p1	c88136_g1_i2.p1	SMAR012998-PA	TRINITY_DN23332_c1_g1_i1.p1	TRINITY_DN35770_c0_g1_i1.p1	TRINITY_DN594_c0_g2_i5.p1	TRINITY_DN714_c0_g1_i1.p1	TRINITY_DN3996_c0_g1_i1.p1	TRINITY_DN1690_c0_g1_i1.p1	TRINITY_DN21788_c0_g1_i1.p1	TRINITY_DN30649_c0_g1_i1.p1	TRINITY_DN2560_c0_g1_i1.p1	TRINITY_DN17784_c0_g1_i1.p1	TRINITY_DN33691_c1_g4_i1.p1	TRINITY_DN73619_c0_g1_i3.p1	TRINITY_DN72937_c0_g1_i1.p1	TRINITY_DN41037_c0_g1_i1.p1		TRINITY_DN15085_c0_g1_i1.p1	TRINITY_DN17014_c0_g1_i1.p1	TRINITY_DN2080_c0_g1_i2.p1	TRINITY_DN5784_c0_g1_i1.p1	TRINITY_DN85179_c0_g1_i1.p1	TRINITY_DN40782_c0_g1_i1.p1	TRINITY_DN8624_c0_g1_i1.p1	TRINITY_DN6695_c0_g1_i2.p1	TRINITY_DN7370_c0_g1_i1.p2	TRINITY_DN1138_c0_g1_i1.p1	TRINITY_DN1523_c0_g1_i1.p1	TRINITY_DN9095_c0_g1_i1.p1	TRINITY_DN1094_c0_g1_i1.p1	TRINITY_DN6190_c0_g1_i10.p1	TRINITY_DN27175_c0_g1_i3.p1	TRINITY_DN23371_c0_g1_i2.p1	TRINITY_DN24153_c0_g1_i1.p1	TRINITY_DN81732_c0_g1_i1.p1	TRINITY_DN11957_c0_g1_i1.p1
141163at6656	TRUE	39	97.5	FBpp0073235	TRINITY_DN15991_c0_g1_i2.p1	TRINITY_DN28301_c0_g1_i1.p2	TRINITY_DN40756_c0_g1_i1.p1	c88377_g2_i1.p1	SMAR010573-PA	TRINITY_DN27708_c0_g2_i3.p1	TRINITY_DN28970_c0_g1_i2.p1	TRINITY_DN4793_c0_g1_i1.p1	TRINITY_DN977_c0_g1_i2.p1	TRINITY_DN1209_c0_g1_i1.p1	TRINITY_DN4418_c0_g1_i1.p1	TRINITY_DN5964_c0_g1_i5.p1	TRINITY_DN571_c0_g1_i1.p1	TRINITY_DN6988_c0_g1_i2.p1	TRINITY_DN6672_c0_g1_i1.p1	TRINITY_DN32903_c1_g1_i20.p1	TRINITY_DN73582_c0_g5_i1.p1	TRINITY_DN78612_c0_g1_i2.p1	TRINITY_DN45139_c0_g1_i1.p1		TRINITY_DN78_c0_g1_i1.p1	TRINITY_DN1922_c0_g1_i1.p1	TRINITY_DN3647_c0_g1_i9.p1	TRINITY_DN6430_c0_g1_i2.p2	TRINITY_DN5254_c0_g1_i1.p1	TRINITY_DN3489_c0_g1_i5.p1	TRINITY_DN3063_c0_g1_i9.p1	TRINITY_DN12638_c0_g1_i1.p1	TRINITY_DN2027_c0_g1_i16.p2	TRINITY_DN5333_c0_g1_i1.p2	TRINITY_DN1528_c0_g1_i1.p1	TRINITY_DN1131_c0_g1_i12.p1	TRINITY_DN15_c0_g1_i1.p1	TRINITY_DN6411_c0_g2_i15.p2	TRINITY_DN26891_c0_g1_i1.p1	TRINITY_DN4022_c0_g2_i1.p1	TRINITY_DN31759_c1_g1_i3.p1	TRINITY_DN57371_c0_g1_i1.p1	TRINITY_DN8906_c0_g1_i1.p1
113865at6656	FALSE	38	95	FBpp0077676	TRINITY_DN56505_c0_g1_i1.p1	TRINITY_DN24682_c0_g1_i1.p2	TRINITY_DN53123_c0_g1_i2.p3	c86170_g1_i3.p2	SMAR011162-PA	TRINITY_DN24839_c0_g2_i1.p1	TRINITY_DN31461_c0_g1_i1.p1	TRINITY_DN31949_c0_g1_i1.p1	TRINITY_DN5551_c0_g1_i2.p1	TRINITY_DN5455_c1_g1_i1.p1	TRINITY_DN27762_c0_g1_i1.p1	TRINITY_DN11432_c0_g1_i1.p1	TRINITY_DN500_c0_g2_i3.p1	TRINITY_DN987_c0_g1_i3.p1	TRINITY_DN38995_c0_g1_i1.p1	TRINITY_DN29034_c0_g1_i2.p1	TRINITY_DN72195_c0_g1_i1.p1	TRINITY_DN89519_c0_g1_i1.p1			TRINITY_DN13290_c0_g1_i9.p1	TRINITY_DN2786_c0_g1_i2.p1	TRINITY_DN19440_c0_g1_i1.p1	TRINITY_DN2261_c1_g1_i2.p2	TRINITY_DN11106_c0_g2_i1.p1	TRINITY_DN3395_c0_g2_i1.p1	TRINITY_DN14301_c0_g1_i2.p1	TRINITY_DN7175_c0_g1_i1.p1	TRINITY_DN1593_c0_g1_i1.p1	TRINITY_DN14339_c0_g1_i2.p2	TRINITY_DN32219_c0_g1_i1.p1	TRINITY_DN11490_c0_g1_i1.p1	TRINITY_DN879_c0_g1_i3.p1	TRINITY_DN12638_c0_g1_i1.p1	TRINITY_DN29108_c0_g1_i1.p1	TRINITY_DN44059_c0_g1_i1.p1	TRINITY_DN25290_c0_g1_i1.p1	TRINITY_DN125625_c0_g1_i1.p1	TRINITY_DN10246_c0_g1_i2.p2
114463at6656	FALSE	39	97.5	FBpp0077149	TRINITY_DN10166_c0_g1_i1.p1	TRINITY_DN986_c0_g1_i1.p1	TRINITY_DN45901_c0_g1_i2.p1	c77337_g1_i1.p1	SMAR006108-PA	TRINITY_DN21498_c0_g1_i3.p1	TRINITY_DN36545_c1_g1_i1.p1	TRINITY_DN43412_c0_g1_i1.p1	TRINITY_DN365_c0_g1_i11.p1	TRINITY_DN11014_c0_g1_i1.p1	TRINITY_DN2685_c0_g1_i1.p1	TRINITY_DN5275_c0_g1_i1.p1	TRINITY_DN6382_c0_g1_i2.p1	TRINITY_DN2957_c0_g1_i2.p1	TRINITY_DN19610_c0_g1_i1.p1	TRINITY_DN23647_c0_g2_i1.p1	TRINITY_DN69806_c0_g1_i2.p1	TRINITY_DN67326_c0_g2_i1.p1	TRINITY_DN91539_c0_g1_i1.p1		TRINITY_DN3167_c0_g2_i5.p1	TRINITY_DN38848_c0_g1_i1.p1	TRINITY_DN5619_c0_g1_i4.p1	TRINITY_DN3863_c0_g1_i2.p1	TRINITY_DN85093_c0_g1_i1.p1	TRINITY_DN30375_c0_g1_i1.p1	TRINITY_DN3123_c0_g2_i1.p1	TRINITY_DN3035_c0_g1_i8.p1	TRINITY_DN1162_c0_g1_i7.p1	TRINITY_DN11896_c0_g1_i1.p1	TRINITY_DN14499_c0_g1_i2.p1	TRINITY_DN342_c0_g1_i1.p1	TRINITY_DN604_c1_g1_i7.p1	TRINITY_DN9614_c0_g1_i1.p1	TRINITY_DN4378_c0_g1_i1.p1	TRINITY_DN22601_c0_g3_i1.p1	TRINITY_DN30803_c0_g1_i2.p2	TRINITY_DN81933_c0_g1_i1.p1	TRINITY_DN13377_c6_g1_i1.p1
116117at6656	FALSE	38	95	FBpp0085477	TRINITY_DN48650_c0_g1_i1.p1	TRINITY_DN27422_c0_g1_i1.p1	TRINITY_DN49786_c0_g1_i3.p2	c83877_g1_i2.p1	SMAR008453-PA	TRINITY_DN24323_c0_g1_i1.p1	TRINITY_DN34990_c0_g1_i2.p1	TRINITY_DN25252_c0_g1_i1.p1	TRINITY_DN660_c0_g1_i12.p2	TRINITY_DN2594_c0_g1_i14.p2	TRINITY_DN5164_c0_g1_i3.p2	TRINITY_DN3925_c0_g1_i1.p1	TRINITY_DN1520_c0_g1_i1.p1	TRINITY_DN18556_c0_g1_i1.p2	TRINITY_DN4799_c0_g1_i1.p1	TRINITY_DN25548_c0_g1_i3.p1	TRINITY_DN72581_c0_g1_i2.p1	TRINITY_DN78232_c0_g1_i1.p1			TRINITY_DN16595_c0_g1_i1.p1	TRINITY_DN38757_c0_g1_i1.p1	TRINITY_DN15453_c0_g1_i1.p1	TRINITY_DN40336_c0_g1_i1.p1	TRINITY_DN84004_c0_g1_i1.p1	TRINITY_DN26365_c0_g1_i1.p1	TRINITY_DN1620_c0_g4_i5.p1	TRINITY_DN7442_c0_g1_i1.p1	TRINITY_DN3035_c0_g1_i5.p1	TRINITY_DN894_c0_g1_i19.p3	TRINITY_DN23510_c0_g1_i2.p1	TRINITY_DN6779_c0_g1_i10.p1	TRINITY_DN8435_c0_g2_i1.p1	TRINITY_DN7298_c0_g1_i1.p1	TRINITY_DN1304_c0_g1_i3.p1	TRINITY_DN21443_c0_g1_i1.p1	TRINITY_DN20185_c0_g1_i1.p1	TRINITY_DN75767_c0_g1_i1.p1	TRINITY_DN7196_c0_g2_i1.p1
149819at6656	TRUE	39	97.5	FBpp0073355	TRINITY_DN10681_c0_g1_i1.p1	TRINITY_DN15552_c0_g2_i1.p1	TRINITY_DN45625_c0_g1_i1.p2	c68072_g1_i1.p1		TRINITY_DN16705_c0_g2_i3.p1	TRINITY_DN23300_c0_g1_i1.p1	TRINITY_DN2927_c0_g1_i1.p1	TRINITY_DN1335_c0_g1_i3.p1	TRINITY_DN3485_c0_g1_i4.p1	TRINITY_DN3159_c0_g1_i3.p1	TRINITY_DN12305_c0_g1_i1.p1	TRINITY_DN2456_c0_g1_i1.p1	TRINITY_DN10333_c0_g1_i1.p1	TRINITY_DN7093_c0_g1_i1.p1	TRINITY_DN1772_c0_g1_i1.p1	TRINITY_DN115722_c0_g1_i1.p1	TRINITY_DN82809_c0_g1_i1.p1	TRINITY_DN46368_c0_g1_i3.p2	TRINITY_DN4998_c0_g1_i1.p1	TRINITY_DN667_c4_g1_i1.p1	TRINITY_DN40055_c0_g1_i1.p1	TRINITY_DN247_c0_g1_i13.p3	TRINITY_DN1292_c0_g1_i1.p2	TRINITY_DN1187_c0_g1_i1.p1	TRINITY_DN621_c0_g1_i4.p1	TRINITY_DN2079_c0_g1_i7.p2	TRINITY_DN7927_c0_g1_i3.p1	TRINITY_DN6333_c0_g1_i1.p1	TRINITY_DN1417_c0_g1_i2.p1	TRINITY_DN2189_c0_g2_i1.p1	TRINITY_DN1793_c0_g1_i2.p1	TRINITY_DN5058_c0_g5_i2.p1	TRINITY_DN2694_c0_g1_i9.p1	TRINITY_DN443_c0_g1_i6.p1	TRINITY_DN23232_c0_g1_i1.p1	TRINITY_DN29494_c0_g1_i1.p1	TRINITY_DN60939_c0_g1_i1.p1	TRINITY_DN14289_c0_g1_i1.p1
156395at6656	TRUE	39	97.5	FBpp0288463	TRINITY_DN26038_c0_g1_i1.p1	TRINITY_DN22643_c0_g1_i1.p1	TRINITY_DN49989_c0_g1_i2.p1	c81674_g1_i1.p1	SMAR002448-PA	TRINITY_DN12087_c0_g1_i1.p1	TRINITY_DN38227_c0_g1_i1.p1	TRINITY_DN34267_c0_g1_i1.p1	TRINITY_DN3067_c0_g1_i2.p1	TRINITY_DN5036_c0_g1_i2.p1	TRINITY_DN13037_c0_g1_i1.p1	TRINITY_DN1494_c0_g1_i2.p1	TRINITY_DN15506_c0_g1_i2.p1	TRINITY_DN886_c0_g1_i2.p1	TRINITY_DN29983_c0_g1_i1.p1	TRINITY_DN33860_c1_g2_i3.p1	TRINITY_DN39993_c0_g1_i1.p1	TRINITY_DN552_c0_g1_i1.p1		TRINITY_DN54463_c0_g1_i1.p1	TRINITY_DN1515_c0_g3_i1.p1	TRINITY_DN1074_c0_g1_i1.p1	TRINITY_DN1809_c0_g1_i2.p1	TRINITY_DN3828_c0_g1_i2.p1	TRINITY_DN29976_c0_g1_i1.p2	TRINITY_DN1020_c0_g1_i1.p1	TRINITY_DN4744_c0_g1_i1.p1	TRINITY_DN7468_c0_g1_i5.p2	TRINITY_DN4982_c2_g1_i1.p3	TRINITY_DN2573_c0_g1_i26.p2	TRINITY_DN370_c0_g1_i1.p1	TRINITY_DN963_c0_g1_i1.p1	TRINITY_DN760_c0_g1_i12.p2	TRINITY_DN10777_c0_g2_i4.p1	TRINITY_DN3006_c0_g1_i1.p1	TRINITY_DN23143_c0_g1_i2.p1	TRINITY_DN20496_c0_g2_i1.p1	TRINITY_DN47222_c0_g2_i1.p1	TRINITY_DN10561_c0_g2_i1.p3
16061at6656	TRUE	39	97.5	FBpp0077654	TRINITY_DN17093_c0_g1_i2.p1	TRINITY_DN34280_c0_g2_i6.p1	TRINITY_DN37461_c0_g1_i1.p1	c97175_g1_i1.p1	SMAR005082-PA	TRINITY_DN26701_c1_g1_i2.p1	TRINITY_DN41886_c0_g1_i1.p1	TRINITY_DN1189_c0_g1_i3.p1	TRINITY_DN6313_c0_g1_i2.p1	TRINITY_DN32784_c0_g1_i1.p1	TRINITY_DN8987_c0_g1_i1.p1	TRINITY_DN34779_c0_g1_i3.p1	TRINITY_DN6583_c0_g1_i1.p1	TRINITY_DN27018_c0_g1_i1.p1	TRINITY_DN13955_c0_g1_i1.p1	TRINITY_DN32240_c1_g7_i1.p1	TRINITY_DN42523_c0_g2_i1.p1	TRINITY_DN79279_c0_g2_i1.p1	TRINITY_DN45633_c0_g1_i2.p1		TRINITY_DN4232_c0_g1_i1.p1	TRINITY_DN31093_c0_g1_i1.p1	TRINITY_DN3245_c0_g3_i3.p1	TRINITY_DN7042_c0_g1_i4.p1	TRINITY_DN72451_c0_g1_i1.p1	TRINITY_DN27226_c0_g1_i1.p1	TRINITY_DN26006_c0_g1_i1.p1	TRINITY_DN15584_c0_g1_i2.p1	TRINITY_DN5238_c0_g1_i5.p1	TRINITY_DN14878_c0_g1_i1.p1	TRINITY_DN3513_c0_g1_i1.p1	TRINITY_DN32617_c0_g1_i1.p1	TRINITY_DN2515_c0_g1_i7.p1	TRINITY_DN8573_c0_g1_i5.p1	TRINITY_DN9412_c0_g1_i1.p1	TRINITY_DN18698_c0_g3_i2.p1	TRINITY_DN13846_c0_g1_i1.p1	TRINITY_DN89624_c0_g1_i1.p1	TRINITY_DN10425_c0_g2_i1.p1
165207at6656	TRUE	39	97.5	FBpp0081380	TRINITY_DN2935_c0_g1_i1.p1	TRINITY_DN30900_c0_g1_i1.p2	TRINITY_DN51227_c0_g1_i1.p3	c96967_g1_i2.p3	SMAR010401-PA	TRINITY_DN23694_c1_g2_i1.p1	TRINITY_DN103865_c0_g1_i1.p1	TRINITY_DN1914_c0_g1_i1.p2	TRINITY_DN753_c0_g1_i1.p2	TRINITY_DN1322_c0_g1_i3.p2	TRINITY_DN26997_c0_g1_i1.p1	TRINITY_DN426_c0_g1_i1.p2	TRINITY_DN46152_c0_g1_i1.p3	TRINITY_DN9289_c0_g1_i1.p1	TRINITY_DN32405_c0_g1_i1.p1	TRINITY_DN12667_c0_g1_i1.p1	TRINITY_DN73486_c1_g1_i1.p2	TRINITY_DN87604_c0_g1_i1.p1	TRINITY_DN43434_c0_g1_i1.p1		TRINITY_DN2111_c0_g1_i5.p1	TRINITY_DN4582_c0_g1_i1.p1	TRINITY_DN5092_c0_g1_i1.p1	TRINITY_DN7844_c0_g1_i1.p2	TRINITY_DN61069_c0_g1_i1.p1	TRINITY_DN21668_c0_g1_i1.p1	TRINITY_DN12342_c0_g4_i1.p2	TRINITY_DN2962_c0_g1_i2.p1	TRINITY_DN939_c0_g1_i4.p3	TRINITY_DN2077_c0_g1_i1.p1	TRINITY_DN1496_c0_g1_i1.p2	TRINITY_DN4062_c0_g2_i1.p1	TRINITY_DN323_c0_g1_i1.p2	TRINITY_DN3936_c0_g1_i1.p1	TRINITY_DN2312_c0_g1_i3.p1	TRINITY_DN42768_c0_g1_i1.p1	TRINITY_DN29868_c1_g2_i2.p1	TRINITY_DN71041_c0_g1_i1.p1	TRINITY_DN12839_c0_g2_i2.p2
22364at6656	TRUE	39	97.5	FBpp0078500	TRINITY_DN7171_c0_g1_i1.p1	TRINITY_DN28350_c0_g1_i1.p1	TRINITY_DN48861_c0_g1_i1.p1	c94745_g2_i1.p1	SMAR008379-PA	TRINITY_DN25110_c0_g1_i1.p1	TRINITY_DN41897_c0_g2_i2.p1	TRINITY_DN2337_c0_g1_i1.p1	TRINITY_DN1997_c0_g1_i1.p1	TRINITY_DN185_c0_g1_i1.p1	TRINITY_DN3358_c0_g1_i2.p1	TRINITY_DN902_c1_g1_i4.p1	TRINITY_DN43718_c0_g1_i1.p1	TRINITY_DN1521_c0_g1_i2.p1	TRINITY_DN25677_c0_g1_i1.p1	TRINITY_DN33106_c5_g1_i1.p1	TRINITY_DN201_c0_g1_i1.p1	TRINITY_DN83704_c0_g1_i1.p1		TRINITY_DN54966_c0_g1_i1.p1	TRINITY_DN1027_c0_g1_i2.p1	TRINITY_DN1684_c0_g1_i1.p1	TRINITY_DN924_c0_g1_i11.p1	TRINITY_DN27860_c0_g1_i1.p1	TRINITY_DN31609_c0_g1_i1.p1	TRINITY_DN10964_c0_g1_i8.p2	TRINITY_DN748_c0_g1_i3.p1	TRINITY_DN6768_c0_g1_i3.p1	TRINITY_DN1891_c0_g6_i1.p1	TRINITY_DN1105_c0_g1_i4.p1	TRINITY_DN17941_c0_g1_i2.p1	TRINITY_DN71421_c0_g1_i1.p1	TRINITY_DN4581_c0_g2_i1.p1	TRINITY_DN3988_c0_g1_i3.p1	TRINITY_DN574_c0_g1_i2.p1	TRINITY_DN10443_c0_g1_i1.p1	TRINITY_DN31748_c2_g7_i2.p1	TRINITY_DN82352_c0_g1_i1.p1	TRINITY_DN10523_c0_g1_i1.p1
123320at6656	FALSE	39	97.5	FBpp0075690	TRINITY_DN2810_c0_g1_i1.p1	TRINITY_DN62336_c0_g1_i1.p1	TRINITY_DN40086_c0_g1_i1.p1	c77475_g1_i1.p1	SMAR006639-PA	TRINITY_DN21831_c0_g1_i1.p1	TRINITY_DN27455_c0_g1_i1.p2	TRINITY_DN19179_c0_g1_i1.p1	TRINITY_DN22758_c0_g1_i1.p1	TRINITY_DN16926_c0_g1_i1.p1	TRINITY_DN22971_c0_g1_i1.p1	TRINITY_DN6938_c0_g1_i7.p4	TRINITY_DN13848_c0_g2_i1.p1	TRINITY_DN21765_c0_g1_i1.p1	TRINITY_DN28712_c0_g3_i2.p1	TRINITY_DN23602_c0_g1_i1.p1	TRINITY_DN52699_c0_g1_i1.p1	TRINITY_DN8160_c0_g1_i1.p1		TRINITY_DN70848_c0_g1_i1.p1	TRINITY_DN4953_c0_g1_i3.p1	TRINITY_DN417_c0_g1_i1.p1	TRINITY_DN15058_c0_g1_i1.p1	TRINITY_DN22735_c0_g1_i1.p1	TRINITY_DN72521_c0_g1_i1.p1	TRINITY_DN54740_c0_g1_i1.p1	TRINITY_DN19922_c0_g1_i1.p1	TRINITY_DN56044_c0_g1_i1.p1	TRINITY_DN18186_c0_g1_i1.p1	TRINITY_DN23983_c0_g1_i2.p1	TRINITY_DN2285_c0_g1_i1.p1	TRINITY_DN2680_c0_g1_i12.p1	TRINITY_DN9634_c0_g1_i2.p1	TRINITY_DN8869_c0_g1_i1.p1	TRINITY_DN2756_c0_g1_i2.p1	TRINITY_DN10045_c0_g1_i1.p1	TRINITY_DN25051_c0_g4_i1.p1	TRINITY_DN21831_c0_g1_i1.p1	TRINITY_DN11738_c2_g1_i1.p1
124400at6656	FALSE	39	97.5	FBpp0082929	TRINITY_DN8257_c0_g1_i1.p1	TRINITY_DN26364_c0_g1_i1.p1	TRINITY_DN43617_c0_g1_i1.p1	c83424_g1_i1.p1	SMAR005142-PA	TRINITY_DN23647_c0_g3_i1.p1	TRINITY_DN33414_c0_g1_i1.p1	TRINITY_DN1597_c0_g1_i1.p1	TRINITY_DN1333_c0_g1_i17.p3	TRINITY_DN18447_c0_g1_i1.p1	TRINITY_DN21877_c0_g1_i2.p1	TRINITY_DN4286_c0_g1_i2.p1	TRINITY_DN1839_c0_g1_i2.p1	TRINITY_DN6460_c0_g2_i1.p1	TRINITY_DN13332_c0_g1_i1.p1	TRINITY_DN38237_c0_g1_i1.p1	TRINITY_DN70766_c0_g1_i1.p1	TRINITY_DN67759_c0_g1_i1.p1		TRINITY_DN43452_c1_g1_i1.p1	TRINITY_DN7885_c0_g1_i1.p1	TRINITY_DN17087_c0_g1_i1.p1	TRINITY_DN1317_c0_g1_i1.p1	TRINITY_DN704_c0_g1_i2.p1	TRINITY_DN2697_c0_g1_i4.p1	TRINITY_DN1988_c0_g1_i5.p1	TRINITY_DN493_c0_g1_i8.p1	TRINITY_DN1757_c0_g1_i12.p1	TRINITY_DN1300_c0_g1_i8.p1	TRINITY_DN3154_c0_g1_i1.p1	TRINITY_DN890_c0_g1_i1.p1	TRINITY_DN4223_c0_g1_i4.p1	TRINITY_DN4134_c0_g1_i1.p1	TRINITY_DN8423_c0_g1_i5.p1	TRINITY_DN9270_c0_g1_i1.p1	TRINITY_DN20264_c0_g1_i1.p1	TRINITY_DN26807_c0_g1_i2.p1	TRINITY_DN92324_c6_g5_i2.p1	TRINITY_DN7388_c0_g1_i1.p2
36387at6656	TRUE	39	97.5	FBpp0077461	TRINITY_DN12538_c0_g2_i1.p1	TRINITY_DN26593_c0_g1_i1.p1	TRINITY_DN51168_c0_g2_i1.p1	c60246_g1_i1.p1	SMAR013003-PA	TRINITY_DN20939_c0_g3_i1.p1	TRINITY_DN34433_c0_g1_i1.p1	TRINITY_DN15779_c0_g1_i3.p1	TRINITY_DN2929_c0_g1_i6.p1	TRINITY_DN27468_c0_g1_i1.p1	TRINITY_DN21756_c0_g1_i1.p1	TRINITY_DN23439_c0_g1_i1.p1		TRINITY_DN4635_c0_g1_i2.p1	TRINITY_DN23486_c0_g1_i1.p1	TRINITY_DN28228_c0_g1_i2.p1	TRINITY_DN68189_c0_g1_i2.p1	TRINITY_DN78038_c0_g1_i2.p1	TRINITY_DN28965_c0_g1_i1.p1	TRINITY_DN17458_c0_g1_i1.p1	TRINITY_DN8079_c0_g2_i2.p1	TRINITY_DN6004_c0_g1_i1.p1	TRINITY_DN6658_c0_g2_i2.p1	TRINITY_DN8818_c0_g1_i2.p1	TRINITY_DN49035_c0_g1_i1.p1	TRINITY_DN3976_c0_g1_i3.p1	TRINITY_DN3362_c0_g1_i5.p1	TRINITY_DN6330_c0_g1_i1.p1	TRINITY_DN3535_c0_g1_i4.p1	TRINITY_DN3164_c0_g1_i6.p1	TRINITY_DN2894_c1_g1_i3.p1	TRINITY_DN11798_c0_g1_i10.p1	TRINITY_DN2160_c0_g1_i5.p2	TRINITY_DN9769_c0_g1_i9.p1	TRINITY_DN5968_c0_g1_i1.p1	TRINITY_DN21140_c1_g5_i2.p1	TRINITY_DN30603_c0_g1_i5.p1	TRINITY_DN87486_c0_g1_i1.p1	TRINITY_DN6753_c0_g2_i1.p1
127349at6656	FALSE	39	97.5	FBpp0074267	TRINITY_DN12435_c0_g1_i1.p1	TRINITY_DN45007_c0_g1_i1.p1	TRINITY_DN48534_c0_g1_i2.p1	c32302_g1_i1.p1	SMAR003376-PA	TRINITY_DN18433_c0_g1_i1.p1	TRINITY_DN27253_c0_g2_i1.p1	TRINITY_DN1066_c0_g1_i1.p1	TRINITY_DN3614_c0_g1_i2.p1	TRINITY_DN3980_c0_g1_i1.p1	TRINITY_DN27462_c0_g1_i1.p1	TRINITY_DN4859_c0_g1_i2.p1	TRINITY_DN4301_c0_g2_i2.p1	TRINITY_DN9304_c0_g1_i2.p1	TRINITY_DN60609_c0_g1_i1.p1	TRINITY_DN28288_c0_g2_i1.p1	TRINITY_DN65109_c0_g2_i1.p1	TRINITY_DN84749_c0_g3_i3.p1		TRINITY_DN38431_c1_g1_i1.p1	TRINITY_DN24151_c2_g1_i1.p1	TRINITY_DN38605_c0_g1_i1.p1	TRINITY_DN2978_c0_g1_i1.p1	TRINITY_DN4950_c0_g1_i1.p1	TRINITY_DN20991_c0_g1_i6.p1	TRINITY_DN60503_c0_g1_i1.p1	TRINITY_DN2405_c1_g1_i1.p1	TRINITY_DN3636_c0_g2_i6.p1	TRINITY_DN505_c1_g2_i1.p1	TRINITY_DN7372_c0_g1_i2.p1	TRINITY_DN5211_c0_g1_i1.p1	TRINITY_DN11133_c0_g1_i2.p1	TRINITY_DN4216_c0_g1_i3.p2	TRINITY_DN13520_c0_g1_i6.p2	TRINITY_DN4012_c0_g1_i5.p1	TRINITY_DN43978_c0_g1_i1.p1	TRINITY_DN31747_c0_g1_i4.p1	TRINITY_DN91324_c1_g3_i1.p1	TRINITY_DN12868_c0_g1_i1.p1
48466at6656	TRUE	39	97.5	FBpp0085357	TRINITY_DN16327_c0_g1_i2.p1	TRINITY_DN31653_c0_g1_i1.p1	TRINITY_DN52184_c0_g1_i5.p1	c98928_g1_i1.p1	SMAR011578-PA	TRINITY_DN25754_c0_g3_i1.p1	TRINITY_DN19281_c0_g1_i1.p1	TRINITY_DN738_c0_g1_i5.p1	TRINITY_DN2152_c0_g1_i66.p1	TRINITY_DN27918_c0_g1_i1.p1	TRINITY_DN29114_c0_g1_i1.p1	TRINITY_DN1026_c0_g1_i1.p1	TRINITY_DN51593_c0_g1_i2.p1	TRINITY_DN2541_c0_g1_i1.p1	TRINITY_DN7032_c0_g2_i1.p1	TRINITY_DN32495_c11_g1_i3.p1	TRINITY_DN61739_c0_g1_i1.p1	TRINITY_DN74676_c0_g2_i1.p1	TRINITY_DN81598_c0_g2_i1.p2		TRINITY_DN10935_c0_g2_i1.p1	TRINITY_DN2574_c0_g1_i1.p1	TRINITY_DN4732_c1_g1_i3.p1	TRINITY_DN10457_c0_g1_i4.p1	TRINITY_DN2843_c0_g1_i2.p1	TRINITY_DN2049_c0_g1_i2.p1	TRINITY_DN15645_c0_g1_i3.p1	TRINITY_DN1008_c0_g1_i9.p1	TRINITY_DN1816_c1_g1_i29.p1	TRINITY_DN3903_c0_g1_i2.p1	TRINITY_DN27853_c0_g1_i1.p1	TRINITY_DN4002_c0_g1_i3.p1	TRINITY_DN1368_c0_g1_i12.p1	TRINITY_DN6394_c0_g1_i13.p1	TRINITY_DN3218_c0_g1_i3.p1	TRINITY_DN23712_c1_g2_i1.p1	TRINITY_DN31207_c1_g1_i5.p1	TRINITY_DN76998_c0_g1_i1.p1	TRINITY_DN11167_c0_g1_i1.p1
49936at6656	TRUE	39	97.5	FBpp0072468	TRINITY_DN5555_c0_g1_i1.p1	TRINITY_DN56166_c0_g1_i1.p1	TRINITY_DN48004_c0_g1_i1.p1	c90990_g1_i4.p1	SMAR008447-PA	TRINITY_DN25791_c0_g3_i1.p1	TRINITY_DN36636_c0_g2_i1.p1	TRINITY_DN2683_c0_g1_i3.p1	TRINITY_DN2503_c0_g1_i1.p1	TRINITY_DN6007_c0_g1_i1.p1	TRINITY_DN4093_c0_g1_i1.p1	TRINITY_DN5205_c0_g1_i1.p1	TRINITY_DN43489_c0_g1_i1.p1	TRINITY_DN641_c0_g1_i5.p1	TRINITY_DN18260_c0_g1_i1.p1	TRINITY_DN20556_c1_g1_i1.p1	TRINITY_DN52629_c0_g1_i1.p1	TRINITY_DN84923_c0_g1_i2.p1	TRINITY_DN42421_c0_g1_i1.p1	TRINITY_DN3003_c0_g1_i1.p1	TRINITY_DN37261_c0_g1_i1.p1		TRINITY_DN4947_c0_g1_i2.p1	TRINITY_DN4182_c0_g1_i2.p1	TRINITY_DN30894_c0_g1_i1.p1	TRINITY_DN40909_c0_g1_i1.p1	TRINITY_DN10552_c0_g1_i1.p1	TRINITY_DN1446_c0_g1_i8.p1	TRINITY_DN1238_c0_g1_i1.p1	TRINITY_DN4691_c0_g1_i2.p1	TRINITY_DN18841_c0_g1_i1.p1	TRINITY_DN2174_c0_g1_i8.p1	TRINITY_DN1832_c3_g1_i1.p1	TRINITY_DN7233_c0_g1_i3.p1	TRINITY_DN816_c0_g1_i1.p1	TRINITY_DN21176_c0_g2_i2.p1	TRINITY_DN31459_c0_g3_i1.p1	TRINITY_DN92135_c0_g1_i7.p1	TRINITY_DN13296_c0_g1_i1.p1
130105at6656	FALSE	38	95	FBpp0086006	TRINITY_DN3594_c0_g1_i1.p1	TRINITY_DN21130_c0_g1_i1.p1	TRINITY_DN46959_c0_g2_i1.p1	c44134_g1_i1.p1	SMAR008434-PA	TRINITY_DN21599_c0_g1_i1.p1	TRINITY_DN38085_c0_g1_i2.p1	TRINITY_DN17045_c0_g1_i2.p2	TRINITY_DN1611_c0_g1_i3.p4	TRINITY_DN25687_c0_g1_i1.p1	TRINITY_DN11678_c0_g1_i1.p1	TRINITY_DN5301_c0_g2_i1.p1	TRINITY_DN51716_c0_g1_i1.p1	TRINITY_DN27654_c0_g1_i1.p1	TRINITY_DN77457_c0_g1_i1.p1		TRINITY_DN69810_c0_g1_i1.p1	TRINITY_DN81206_c1_g2_i2.p1	TRINITY_DN42358_c0_g1_i2.p1		TRINITY_DN9761_c0_g1_i4.p1	TRINITY_DN7037_c0_g1_i1.p1	TRINITY_DN2393_c0_g1_i1.p1	TRINITY_DN1241_c1_g1_i3.p1	TRINITY_DN2230_c0_g1_i2.p1	TRINITY_DN11894_c0_g1_i1.p1	TRINITY_DN2269_c0_g1_i3.p1	TRINITY_DN6136_c0_g1_i2.p1	TRINITY_DN2488_c0_g1_i2.p1	TRINITY_DN27781_c0_g1_i2.p2	TRINITY_DN262_c1_g1_i1.p1	TRINITY_DN2968_c0_g1_i12.p1	TRINITY_DN2158_c0_g1_i2.p1	TRINITY_DN12070_c0_g1_i3.p1	TRINITY_DN7852_c0_g1_i1.p2	TRINITY_DN7249_c0_g1_i1.p1	TRINITY_DN22208_c1_g1_i1.p1	TRINITY_DN88091_c1_g2_i1.p1	TRINITY_DN12880_c1_g1_i1.p1
61096at6656	TRUE	39	97.5	FBpp0085546	TRINITY_DN15244_c0_g1_i1.p1	TRINITY_DN34682_c0_g1_i5.p2	TRINITY_DN43656_c0_g1_i1.p1	c96638_g2_i1.p1	SMAR010633-PA	TRINITY_DN27069_c0_g2_i2.p1	TRINITY_DN36609_c0_g1_i1.p1	TRINITY_DN5578_c0_g1_i10.p1	TRINITY_DN4827_c0_g1_i10.p1	TRINITY_DN31586_c0_g1_i1.p1	TRINITY_DN11364_c0_g1_i1.p1	TRINITY_DN1830_c0_g1_i3.p1	TRINITY_DN8686_c0_g1_i1.p1	TRINITY_DN5384_c0_g1_i2.p1	TRINITY_DN67754_c0_g1_i1.p1	TRINITY_DN32620_c0_g1_i2.p1	TRINITY_DN70684_c0_g1_i1.p1	TRINITY_DN80124_c0_g1_i1.p1	TRINITY_DN18564_c0_g1_i1.p1		TRINITY_DN10667_c0_g1_i3.p1	TRINITY_DN6128_c0_g1_i1.p1	TRINITY_DN11352_c0_g1_i1.p1	TRINITY_DN16672_c0_g1_i1.p1	TRINITY_DN5170_c0_g1_i1.p1	TRINITY_DN40679_c0_g1_i1.p1	TRINITY_DN9008_c0_g2_i1.p1	TRINITY_DN13694_c0_g1_i1.p1	TRINITY_DN8783_c0_g1_i1.p1	TRINITY_DN2938_c0_g1_i3.p1	TRINITY_DN775_c0_g2_i2.p1	TRINITY_DN2329_c0_g1_i1.p1	TRINITY_DN11029_c0_g1_i1.p1	TRINITY_DN10192_c0_g1_i1.p1	TRINITY_DN15068_c0_g1_i1.p1	TRINITY_DN21287_c0_g1_i1.p1	TRINITY_DN29324_c0_g1_i6.p1	TRINITY_DN14282_c0_g1_i1.p1	TRINITY_DN2396_c0_g1_i1.p1
80067at6656	TRUE	39	97.5	FBpp0083665	TRINITY_DN8089_c0_g1_i1.p1	TRINITY_DN19962_c0_g1_i1.p1	TRINITY_DN37785_c0_g1_i1.p1	c90607_g1_i2.p1	SMAR006629-PA	TRINITY_DN20362_c1_g1_i1.p1	TRINITY_DN42075_c3_g1_i1.p2	TRINITY_DN14108_c0_g1_i2.p1	TRINITY_DN5649_c0_g1_i1.p1	TRINITY_DN358_c0_g1_i2.p2	TRINITY_DN32427_c0_g1_i1.p1	TRINITY_DN15973_c0_g1_i2.p1	TRINITY_DN5904_c0_g1_i1.p1	TRINITY_DN1273_c0_g1_i1.p1	TRINITY_DN23941_c0_g1_i2.p1	TRINITY_DN31713_c1_g1_i1.p2	TRINITY_DN39965_c0_g1_i1.p1	TRINITY_DN80962_c0_g3_i2.p1	TRINITY_DN31405_c0_g2_i1.p1		TRINITY_DN18303_c0_g1_i3.p1	TRINITY_DN13556_c0_g1_i2.p1	TRINITY_DN16017_c0_g1_i1.p1	TRINITY_DN6226_c0_g1_i2.p1	TRINITY_DN55925_c0_g1_i1.p1	TRINITY_DN6682_c1_g1_i1.p1	TRINITY_DN10052_c0_g1_i23.p1	TRINITY_DN55109_c0_g1_i1.p1	TRINITY_DN2254_c0_g1_i16.p3	TRINITY_DN4062_c0_g1_i1.p1	TRINITY_DN6195_c1_g1_i3.p1	TRINITY_DN7804_c0_g1_i3.p1	TRINITY_DN2572_c0_g1_i4.p1	TRINITY_DN6281_c0_g1_i4.p1	TRINITY_DN6495_c0_g1_i1.p1	TRINITY_DN16632_c0_g1_i2.p1	TRINITY_DN26535_c0_g1_i2.p1	TRINITY_DN111826_c0_g1_i1.p1	TRINITY_DN13343_c14_g1_i1.p2
95089at6656	TRUE	39	97.5	FBpp0087722	TRINITY_DN67013_c0_g2_i1.p1	TRINITY_DN21458_c0_g1_i1.p1	TRINITY_DN50903_c0_g1_i1.p1	c78680_g1_i1.p1	SMAR007373-PA	TRINITY_DN21700_c0_g5_i2.p1	TRINITY_DN39971_c0_g1_i1.p1	TRINITY_DN577_c0_g1_i1.p1	TRINITY_DN7514_c0_g1_i2.p1	TRINITY_DN26908_c0_g1_i1.p1	TRINITY_DN2689_c0_g1_i1.p1	TRINITY_DN37438_c0_g1_i1.p1	TRINITY_DN44539_c0_g1_i1.p1	TRINITY_DN26772_c0_g1_i2.p1	TRINITY_DN25947_c1_g1_i2.p1	TRINITY_DN32812_c0_g1_i3.p1	TRINITY_DN68194_c0_g2_i1.p1	TRINITY_DN76820_c0_g1_i2.p1		TRINITY_DN49024_c0_g1_i1.p1	TRINITY_DN51594_c0_g1_i1.p1	TRINITY_DN2706_c0_g1_i1.p1	TRINITY_DN6633_c0_g1_i1.p1	TRINITY_DN1923_c0_g3_i1.p1	TRINITY_DN30740_c0_g1_i1.p1	TRINITY_DN3107_c0_g1_i1.p1	TRINITY_DN11056_c0_g1_i1.p1	TRINITY_DN7993_c0_g1_i2.p1	TRINITY_DN1579_c0_g2_i9.p1	TRINITY_DN3176_c0_g1_i5.p1	TRINITY_DN316_c0_g1_i2.p1	TRINITY_DN2447_c0_g1_i5.p1	TRINITY_DN1213_c0_g1_i3.p1	TRINITY_DN4791_c0_g1_i1.p1	TRINITY_DN360_c0_g1_i1.p1	TRINITY_DN8165_c0_g1_i1.p1	TRINITY_DN27971_c0_g2_i3.p1	TRINITY_DN92633_c1_g2_i7.p1	TRINITY_DN7321_c0_g1_i1.p1
97749at6656	TRUE	39	97.5	FBpp0081148	TRINITY_DN19477_c2_g4_i2.p1	TRINITY_DN33581_c0_g1_i1.p1	TRINITY_DN42129_c0_g1_i1.p1	c96527_g1_i4.p1	SMAR014147-PA	TRINITY_DN28185_c0_g1_i1.p1	TRINITY_DN29083_c0_g1_i1.p1	TRINITY_DN2196_c0_g1_i3.p1	TRINITY_DN5132_c0_g2_i2.p1	TRINITY_DN9095_c0_g1_i1.p1	TRINITY_DN1177_c0_g1_i1.p1	TRINITY_DN1932_c0_g1_i5.p1		TRINITY_DN2415_c0_g1_i3.p1	TRINITY_DN29495_c0_g2_i1.p1	TRINITY_DN24568_c0_g1_i2.p1	TRINITY_DN57735_c0_g2_i1.p1	TRINITY_DN84558_c0_g1_i1.p1	TRINITY_DN3913_c0_g1_i1.p1	TRINITY_DN66007_c0_g1_i1.p1	TRINITY_DN2507_c0_g1_i3.p1	TRINITY_DN40585_c0_g1_i1.p1	TRINITY_DN2224_c0_g1_i4.p1	TRINITY_DN4171_c0_g1_i3.p1	TRINITY_DN54711_c0_g1_i1.p1	TRINITY_DN6194_c0_g1_i3.p1	TRINITY_DN7449_c0_g1_i6.p1	TRINITY_DN5194_c0_g1_i3.p1	TRINITY_DN3559_c0_g1_i17.p1	TRINITY_DN3520_c0_g1_i3.p1	TRINITY_DN34973_c0_g1_i1.p1	TRINITY_DN10691_c0_g1_i8.p1	TRINITY_DN1286_c0_g1_i32.p1	TRINITY_DN1551_c0_g1_i1.p1	TRINITY_DN4737_c0_g2_i1.p1	TRINITY_DN22084_c0_g1_i2.p1	TRINITY_DN31104_c0_g1_i5.p1	TRINITY_DN91713_c7_g2_i1.p1	TRINITY_DN11879_c0_g1_i1.p2
104588at6656	TRUE	39	97.5	FBpp0079699	TRINITY_DN18451_c0_g1_i1.p1	TRINITY_DN25979_c0_g1_i1.p1	TRINITY_DN15526_c0_g1_i1.p1	c84937_g1_i2.p1	SMAR007735-PA	TRINITY_DN26422_c0_g1_i1.p1	TRINITY_DN30885_c0_g1_i1.p1	TRINITY_DN0_c0_g1_i1.p1	TRINITY_DN5307_c0_g1_i2.p1	TRINITY_DN3243_c0_g1_i5.p1	TRINITY_DN2020_c0_g1_i1.p1	TRINITY_DN7814_c0_g1_i5.p1	TRINITY_DN12718_c2_g3_i1.p1	TRINITY_DN31661_c0_g1_i1.p1	TRINITY_DN5031_c0_g1_i1.p1	TRINITY_DN31271_c2_g5_i1.p2	TRINITY_DN71880_c0_g1_i1.p1	TRINITY_DN84659_c0_g3_i1.p1	TRINITY_DN35620_c0_g1_i1.p1		TRINITY_DN5655_c2_g3_i1.p1	TRINITY_DN4491_c0_g1_i1.p1	TRINITY_DN5772_c0_g1_i1.p1	TRINITY_DN901_c0_g1_i1.p1	TRINITY_DN7411_c0_g1_i1.p1	TRINITY_DN4790_c0_g2_i2.p1	TRINITY_DN1987_c0_g1_i19.p1	TRINITY_DN3460_c0_g1_i4.p1	TRINITY_DN888_c0_g1_i11.p1	TRINITY_DN14994_c0_g1_i1.p1	TRINITY_DN9691_c0_g1_i1.p1	TRINITY_DN1767_c0_g1_i6.p1	TRINITY_DN2448_c0_g1_i1.p2	TRINITY_DN8994_c0_g1_i1.p1	TRINITY_DN7300_c0_g1_i2.p1	TRINITY_DN23038_c0_g3_i3.p1	TRINITY_DN25232_c0_g1_i3.p1	TRINITY_DN85304_c14_g2_i1.p1	TRINITY_DN1698_c0_g1_i1.p1
109724at6656	TRUE	39	97.5	FBpp0076246	TRINITY_DN5103_c0_g2_i1.p1	TRINITY_DN25181_c0_g2_i1.p1	TRINITY_DN20906_c0_g1_i2.p1	c94524_g1_i1.p1	SMAR008993-PA	TRINITY_DN26252_c0_g2_i1.p1	TRINITY_DN32117_c0_g1_i1.p1	TRINITY_DN38522_c0_g1_i1.p1	TRINITY_DN279_c0_g1_i24.p1	TRINITY_DN2683_c0_g1_i2.p1	TRINITY_DN1214_c0_g1_i2.p1	TRINITY_DN2191_c0_g2_i3.p1	TRINITY_DN4388_c0_g1_i2.p1	TRINITY_DN4449_c0_g1_i3.p1	TRINITY_DN6964_c0_g2_i1.p1	TRINITY_DN64141_c0_g1_i1.p1	TRINITY_DN49657_c0_g1_i5.p1	TRINITY_DN73688_c0_g1_i1.p1	TRINITY_DN30882_c0_g2_i1.p1	TRINITY_DN76053_c0_g1_i1.p1	TRINITY_DN4374_c0_g1_i1.p1		TRINITY_DN5974_c0_g1_i1.p1	TRINITY_DN2878_c0_g1_i7.p1	TRINITY_DN36688_c0_g1_i1.p1	TRINITY_DN60469_c0_g1_i1.p1	TRINITY_DN10493_c0_g2_i1.p1	TRINITY_DN13192_c0_g1_i3.p1	TRINITY_DN2538_c0_g1_i17.p1	TRINITY_DN3492_c0_g1_i4.p1	TRINITY_DN11615_c0_g1_i1.p1	TRINITY_DN12894_c0_g1_i6.p1	TRINITY_DN5429_c0_g1_i4.p1	TRINITY_DN5609_c0_g1_i11.p1	TRINITY_DN1840_c0_g1_i7.p1	TRINITY_DN24609_c0_g1_i1.p1	TRINITY_DN28401_c0_g1_i2.p1	TRINITY_DN70194_c0_g1_i1.p1	TRINITY_DN11954_c0_g1_i1.p1
120907at6656	TRUE	39	97.5	FBpp0289334	TRINITY_DN8999_c0_g1_i1.p1	TRINITY_DN34190_c0_g1_i1.p1	TRINITY_DN48460_c0_g1_i1.p2	c76202_g1_i1.p1	SMAR006047-PA	TRINITY_DN23486_c0_g2_i1.p1	TRINITY_DN14832_c0_g1_i1.p1	TRINITY_DN9848_c0_g1_i2.p1	TRINITY_DN6697_c0_g1_i2.p1	TRINITY_DN4495_c0_g1_i1.p1	TRINITY_DN13273_c0_g1_i1.p1	TRINITY_DN1971_c0_g1_i4.p1	TRINITY_DN7845_c0_g1_i1.p1	TRINITY_DN4732_c0_g1_i2.p1	TRINITY_DN26848_c0_g1_i1.p1	TRINITY_DN33714_c0_g1_i1.p2	TRINITY_DN47274_c0_g1_i1.p1	TRINITY_DN51019_c0_g1_i1.p1	TRINITY_DN3165_c0_g1_i1.p1		TRINITY_DN1160_c2_g1_i1.p1	TRINITY_DN1797_c0_g1_i3.p1	TRINITY_DN6006_c1_g1_i1.p1	TRINITY_DN1674_c1_g2_i2.p1	TRINITY_DN85325_c0_g1_i2.p1	TRINITY_DN3266_c0_g1_i3.p1	TRINITY_DN3518_c0_g1_i9.p2	TRINITY_DN2917_c2_g1_i1.p1	TRINITY_DN2676_c0_g1_i5.p2	TRINITY_DN5751_c0_g1_i1.p1	TRINITY_DN4075_c0_g1_i1.p1	TRINITY_DN3119_c0_g1_i2.p1	TRINITY_DN6206_c0_g1_i27.p1	TRINITY_DN4294_c0_g1_i1.p1	TRINITY_DN1983_c0_g1_i1.p1	TRINITY_DN21469_c0_g1_i1.p1	TRINITY_DN33967_c29_g1_i1.p1	TRINITY_DN91231_c7_g1_i1.p1	TRINITY_DN12932_c1_g1_i2.p1
129675at6656	TRUE	39	97.5	FBpp0070007	TRINITY_DN10832_c0_g2_i1.p1	TRINITY_DN37961_c0_g1_i1.p1	TRINITY_DN52398_c0_g14_i1.p3	c98660_g1_i2.p2	SMAR007126-PA	TRINITY_DN16801_c0_g1_i1.p1	TRINITY_DN50141_c0_g1_i1.p1	TRINITY_DN5510_c0_g1_i2.p1	TRINITY_DN4285_c0_g1_i11.p1	TRINITY_DN15485_c0_g1_i1.p1	TRINITY_DN2290_c0_g1_i2.p1	TRINITY_DN5025_c1_g1_i1.p1	TRINITY_DN2480_c0_g1_i3.p1	TRINITY_DN1563_c0_g1_i1.p1	TRINITY_DN25006_c0_g1_i1.p1	TRINITY_DN28777_c0_g1_i2.p1	TRINITY_DN70459_c0_g2_i1.p1	TRINITY_DN83863_c0_g2_i2.p1	TRINITY_DN24479_c0_g1_i1.p1		TRINITY_DN4645_c2_g1_i1.p1	TRINITY_DN6832_c0_g1_i2.p1	TRINITY_DN17184_c0_g1_i1.p1	TRINITY_DN3659_c0_g1_i2.p1	TRINITY_DN5312_c0_g3_i1.p1	TRINITY_DN43333_c0_g1_i1.p1	TRINITY_DN30482_c0_g1_i1.p1	TRINITY_DN8379_c0_g1_i1.p1	TRINITY_DN6857_c0_g1_i1.p1	TRINITY_DN20591_c0_g1_i2.p1	TRINITY_DN14541_c0_g1_i1.p1	TRINITY_DN2333_c0_g1_i1.p1	TRINITY_DN3319_c0_g1_i1.p1	TRINITY_DN8264_c0_g1_i1.p1	TRINITY_DN18472_c0_g1_i1.p1	TRINITY_DN19308_c0_g2_i2.p1	TRINITY_DN26826_c0_g1_i1.p1	TRINITY_DN69555_c0_g2_i1.p1	TRINITY_DN13183_c5_g1_i1.p1
146383at6656	TRUE	39	97.5	FBpp0081918	TRINITY_DN14018_c0_g1_i1.p1	TRINITY_DN30730_c2_g1_i1.p1	TRINITY_DN52764_c0_g1_i3.p2	c184565_g1_i1.p1	SMAR006150-PA	TRINITY_DN26598_c0_g2_i1.p1	TRINITY_DN35178_c0_g1_i2.p1	TRINITY_DN5900_c0_g1_i1.p1	TRINITY_DN7158_c0_g1_i1.p1	TRINITY_DN31843_c0_g1_i1.p1	TRINITY_DN32931_c0_g1_i2.p1	TRINITY_DN2244_c0_g1_i1.p1	TRINITY_DN52424_c0_g1_i1.p1	TRINITY_DN5935_c0_g2_i1.p1		TRINITY_DN33108_c4_g1_i1.p2	TRINITY_DN69899_c0_g1_i2.p1	TRINITY_DN76908_c1_g1_i2.p1	TRINITY_DN10254_c0_g1_i1.p1	TRINITY_DN78029_c0_g1_i1.p1	TRINITY_DN1699_c0_g3_i1.p1	TRINITY_DN24913_c0_g1_i1.p1	TRINITY_DN1265_c0_g1_i16.p3	TRINITY_DN1227_c0_g1_i2.p2	TRINITY_DN6500_c0_g1_i3.p1	TRINITY_DN2693_c0_g1_i1.p2	TRINITY_DN24301_c0_g1_i1.p1	TRINITY_DN4115_c0_g1_i1.p1	TRINITY_DN3506_c0_g1_i1.p2	TRINITY_DN198_c0_g2_i1.p1	TRINITY_DN8939_c0_g3_i1.p1	TRINITY_DN1160_c0_g1_i18.p1	TRINITY_DN5514_c0_g1_i1.p1	TRINITY_DN4374_c0_g1_i3.p1	TRINITY_DN15902_c0_g1_i1.p1	TRINITY_DN17168_c0_g1_i1.p1	TRINITY_DN23182_c0_g3_i2.p1	TRINITY_DN85768_c1_g1_i1.p1	TRINITY_DN12548_c0_g2_i1.p2
163670at6656	TRUE	39	97.5	FBpp0076601	TRINITY_DN66192_c0_g1_i1.p1	TRINITY_DN34374_c0_g1_i3.p3	TRINITY_DN51864_c0_g1_i1.p1	c100269_g1_i3.p2	SMAR001179-PA	TRINITY_DN23517_c0_g1_i1.p1	TRINITY_DN49620_c0_g1_i1.p1	TRINITY_DN1356_c0_g1_i1.p2	TRINITY_DN1394_c0_g1_i11.p1	TRINITY_DN5605_c0_g1_i1.p1	TRINITY_DN11411_c0_g1_i1.p2	TRINITY_DN16383_c0_g1_i1.p1		TRINITY_DN22730_c0_g1_i1.p1	TRINITY_DN75055_c0_g1_i1.p1	TRINITY_DN28554_c0_g1_i1.p1	TRINITY_DN71622_c0_g1_i3.p1	TRINITY_DN75273_c0_g3_i1.p1	TRINITY_DN48712_c0_g1_i1.p1	TRINITY_DN33253_c0_g1_i1.p1	TRINITY_DN3016_c0_g1_i11.p1	TRINITY_DN3283_c0_g1_i1.p1	TRINITY_DN13640_c0_g1_i1.p1	TRINITY_DN10096_c0_g2_i12.p1	TRINITY_DN1167_c0_g1_i4.p1	TRINITY_DN2230_c0_g1_i1.p1	TRINITY_DN14737_c0_g1_i8.p1	TRINITY_DN12850_c0_g1_i1.p1	TRINITY_DN4898_c0_g1_i10.p2	TRINITY_DN14414_c0_g1_i2.p2	TRINITY_DN1350_c0_g1_i3.p2	TRINITY_DN6958_c0_g1_i3.p1	TRINITY_DN267_c0_g1_i1.p1	TRINITY_DN2374_c0_g1_i2.p2	TRINITY_DN2664_c0_g1_i5.p2	TRINITY_DN10806_c0_g1_i1.p1	TRINITY_DN23508_c0_g1_i2.p1	TRINITY_DN65971_c0_g1_i2.p1	TRINITY_DN13697_c0_g1_i1.p1
31820at6656	TRUE	39	97.5	FBpp0288666	TRINITY_DN7256_c0_g1_i1.p1	TRINITY_DN7401_c0_g1_i1.p1	TRINITY_DN51193_c2_g2_i2.p1	c93260_g2_i1.p1	SMAR004045-PA	TRINITY_DN28026_c0_g9_i1.p1	TRINITY_DN7446_c0_g1_i1.p1	TRINITY_DN3307_c0_g1_i2.p1	TRINITY_DN2937_c0_g1_i2.p1	TRINITY_DN27583_c0_g1_i1.p1	TRINITY_DN11297_c0_g1_i1.p1	TRINITY_DN22848_c0_g1_i1.p1	TRINITY_DN31048_c0_g1_i1.p1	TRINITY_DN1491_c2_g4_i1.p1	TRINITY_DN28399_c0_g1_i1.p1	TRINITY_DN23302_c0_g3_i3.p1	TRINITY_DN49042_c0_g1_i1.p1	TRINITY_DN87203_c1_g2_i1.p1	TRINITY_DN92330_c0_g1_i1.p1		TRINITY_DN3586_c0_g2_i2.p1	TRINITY_DN31424_c0_g1_i1.p1	TRINITY_DN2977_c0_g1_i3.p1	TRINITY_DN6693_c0_g1_i2.p1	TRINITY_DN59519_c0_g1_i1.p1	TRINITY_DN34957_c0_g1_i1.p1	TRINITY_DN5666_c0_g1_i1.p1	TRINITY_DN4084_c0_g1_i3.p1	TRINITY_DN2062_c0_g1_i3.p1	TRINITY_DN27742_c0_g1_i1.p1	TRINITY_DN3950_c0_g1_i1.p1	TRINITY_DN6136_c0_g1_i5.p1	TRINITY_DN11082_c0_g1_i1.p1	TRINITY_DN6495_c0_g1_i8.p1	TRINITY_DN1262_c0_g1_i1.p1	TRINITY_DN5328_c0_g1_i1.p1	TRINITY_DN31068_c1_g2_i9.p1	TRINITY_DN53063_c0_g1_i1.p1	TRINITY_DN2624_c0_g1_i1.p1
146600at6656	FALSE	37	92.5	FBpp0086399	TRINITY_DN40088_c0_g1_i1.p1	TRINITY_DN62589_c0_g1_i1.p1	TRINITY_DN53135_c0_g4_i1.p3	c76804_g1_i1.p1	SMAR015323-PA	TRINITY_DN28600_c2_g3_i1.p1	TRINITY_DN3894_c0_g2_i1.p1	TRINITY_DN3419_c0_g1_i7.p1	TRINITY_DN7694_c0_g1_i1.p1	TRINITY_DN39_c0_g1_i2.p1	TRINITY_DN743_c0_g1_i1.p2	TRINITY_DN35040_c0_g1_i1.p1		TRINITY_DN17439_c0_g1_i1.p1	TRINITY_DN9310_c0_g1_i1.p1	TRINITY_DN32962_c3_g1_i1.p1	TRINITY_DN72492_c0_g1_i1.p1	TRINITY_DN57934_c0_g1_i1.p1			TRINITY_DN33803_c0_g1_i1.p1	TRINITY_DN467_c0_g1_i1.p1	TRINITY_DN1049_c0_g1_i1.p1	TRINITY_DN28312_c0_g1_i1.p1	TRINITY_DN37425_c0_g1_i1.p1	TRINITY_DN23218_c0_g1_i3.p1	TRINITY_DN4500_c0_g1_i1.p1	TRINITY_DN3690_c0_g1_i1.p1	TRINITY_DN486_c0_g1_i18.p2	TRINITY_DN2328_c0_g1_i1.p1	TRINITY_DN28577_c0_g1_i1.p1	TRINITY_DN9508_c0_g1_i3.p1	TRINITY_DN2963_c0_g1_i3.p2	TRINITY_DN2069_c0_g1_i2.p1	TRINITY_DN5236_c0_g1_i1.p1	TRINITY_DN19825_c0_g2_i1.p1	TRINITY_DN29599_c0_g1_i1.p1	TRINITY_DN17974_c0_g2_i1.p1	TRINITY_DN12598_c0_g1_i1.p2
42842at6656	TRUE	39	97.5	FBpp0082104	TRINITY_DN9370_c0_g1_i1.p1	TRINITY_DN23594_c0_g1_i2.p1	TRINITY_DN43738_c0_g1_i1.p1	c97610_g1_i2.p1	SMAR006809-PA	TRINITY_DN11108_c0_g4_i1.p1	TRINITY_DN67801_c0_g1_i1.p1	TRINITY_DN3352_c0_g1_i1.p1	TRINITY_DN3335_c0_g1_i3.p1	TRINITY_DN27419_c0_g1_i1.p1	TRINITY_DN18315_c0_g1_i1.p1	TRINITY_DN3314_c0_g1_i1.p1	TRINITY_DN33688_c0_g1_i1.p1	TRINITY_DN13782_c0_g1_i1.p1		TRINITY_DN31811_c0_g2_i1.p1	TRINITY_DN63413_c0_g1_i1.p1	TRINITY_DN85164_c0_g1_i2.p1	TRINITY_DN44546_c0_g1_i1.p1	TRINITY_DN35378_c0_g2_i1.p1	TRINITY_DN2887_c1_g1_i1.p1	TRINITY_DN51074_c0_g1_i1.p1	TRINITY_DN4175_c0_g1_i1.p1	TRINITY_DN42380_c0_g1_i1.p1	TRINITY_DN30911_c0_g1_i1.p1	TRINITY_DN5511_c0_g1_i2.p1	TRINITY_DN10684_c0_g2_i1.p1	TRINITY_DN4820_c0_g1_i2.p1	TRINITY_DN6244_c0_g2_i1.p1	TRINITY_DN3549_c0_g1_i3.p1	TRINITY_DN4131_c0_g1_i1.p1	TRINITY_DN6567_c0_g1_i2.p1	TRINITY_DN3438_c0_g1_i1.p1	TRINITY_DN10575_c2_g1_i2.p1	TRINITY_DN24009_c0_g1_i1.p1	TRINITY_DN25368_c0_g1_i1.p1	TRINITY_DN28299_c0_g4_i1.p1	TRINITY_DN88932_c4_g4_i1.p1	TRINITY_DN13394_c4_g1_i1.p1
42929at6656	TRUE	39	97.5	FBpp0085308	TRINITY_DN18228_c0_g1_i3.p1	TRINITY_DN33583_c0_g1_i1.p2	TRINITY_DN49998_c0_g2_i1.p1	c100590_g4_i8.p1	SMAR014195-PA	TRINITY_DN27843_c1_g2_i1.p1	TRINITY_DN40891_c0_g1_i1.p1	TRINITY_DN6001_c0_g1_i2.p1	TRINITY_DN4132_c1_g1_i3.p1	TRINITY_DN21569_c0_g1_i1.p1	TRINITY_DN32525_c0_g1_i1.p1	TRINITY_DN2101_c0_g1_i6.p1		TRINITY_DN21816_c0_g1_i1.p1	TRINITY_DN28717_c0_g1_i1.p1	TRINITY_DN33474_c0_g1_i7.p1	TRINITY_DN68893_c0_g1_i1.p1	TRINITY_DN85458_c0_g1_i2.p1	TRINITY_DN46364_c0_g1_i1.p1	TRINITY_DN80231_c0_g1_i1.p1	TRINITY_DN51462_c0_g1_i1.p1	TRINITY_DN3487_c0_g1_i2.p1	TRINITY_DN16928_c0_g1_i1.p1	TRINITY_DN27984_c0_g1_i1.p1	TRINITY_DN30010_c0_g1_i1.p1	TRINITY_DN31447_c0_g1_i1.p1	TRINITY_DN2255_c0_g1_i3.p1	TRINITY_DN4393_c0_g1_i1.p1	TRINITY_DN1099_c0_g1_i11.p1	TRINITY_DN4639_c0_g1_i1.p1	TRINITY_DN3130_c0_g1_i2.p1	TRINITY_DN2482_c0_g2_i2.p1	TRINITY_DN2228_c0_g1_i1.p1	TRINITY_DN2308_c0_g1_i2.p1	TRINITY_DN26657_c0_g1_i1.p1	TRINITY_DN24963_c0_g1_i1.p1	TRINITY_DN28389_c0_g2_i1.p1	TRINITY_DN91825_c0_g4_i1.p1	TRINITY_DN13037_c2_g1_i1.p1
84422at6656	TRUE	39	97.5	FBpp0072696	TRINITY_DN30244_c0_g1_i1.p1	TRINITY_DN32783_c0_g1_i4.p1	TRINITY_DN47268_c0_g1_i1.p1	c96389_g3_i5.p1	SMAR010680-PA	TRINITY_DN20459_c0_g3_i1.p1	TRINITY_DN6143_c0_g1_i1.p1	TRINITY_DN8142_c0_g1_i2.p1	TRINITY_DN5120_c0_g1_i5.p2	TRINITY_DN22114_c0_g1_i1.p1	TRINITY_DN9873_c0_g1_i1.p1	TRINITY_DN1846_c0_g1_i3.p1	TRINITY_DN44176_c0_g1_i1.p2	TRINITY_DN4858_c0_g1_i3.p1	TRINITY_DN60823_c0_g1_i1.p1	TRINITY_DN31943_c0_g1_i6.p1	TRINITY_DN68711_c0_g1_i1.p1	TRINITY_DN73393_c0_g1_i1.p1		TRINITY_DN69917_c0_g1_i1.p1	TRINITY_DN37752_c0_g1_i1.p1	TRINITY_DN2311_c0_g1_i10.p1	TRINITY_DN19568_c0_g1_i1.p1	TRINITY_DN7750_c0_g1_i3.p1	TRINITY_DN36525_c0_g1_i1.p1	TRINITY_DN40321_c0_g1_i1.p1	TRINITY_DN8220_c1_g1_i4.p3	TRINITY_DN4094_c0_g1_i1.p1	TRINITY_DN2565_c0_g1_i3.p1	TRINITY_DN11383_c0_g1_i1.p1	TRINITY_DN22769_c0_g1_i1.p1	TRINITY_DN17660_c0_g1_i2.p1	TRINITY_DN6899_c0_g1_i1.p1	TRINITY_DN3384_c0_g1_i22.p1	TRINITY_DN1142_c0_g2_i1.p2	TRINITY_DN10309_c0_g1_i1.p1	TRINITY_DN25843_c0_g2_i1.p1	TRINITY_DN62307_c0_g1_i1.p1	TRINITY_DN6532_c0_g1_i1.p1
96251at6656	TRUE	39	97.5	FBpp0291066	TRINITY_DN79700_c0_g1_i1.p1	TRINITY_DN28415_c1_g2_i1.p1	TRINITY_DN29524_c0_g1_i1.p1	c81594_g1_i2.p1	SMAR005409-PA	TRINITY_DN21830_c0_g1_i1.p1	TRINITY_DN35635_c1_g1_i1.p2	TRINITY_DN15631_c0_g1_i2.p1	TRINITY_DN6384_c0_g1_i2.p3	TRINITY_DN3010_c0_g1_i1.p1	TRINITY_DN601_c0_g1_i2.p1	TRINITY_DN838_c0_g1_i6.p2	TRINITY_DN41288_c0_g1_i1.p1	TRINITY_DN4199_c0_g1_i1.p1	TRINITY_DN29980_c0_g1_i2.p1	TRINITY_DN47099_c1_g1_i1.p1	TRINITY_DN71433_c0_g1_i1.p1	TRINITY_DN60908_c0_g1_i1.p1		TRINITY_DN32219_c0_g3_i1.p1	TRINITY_DN447_c0_g1_i1.p1	TRINITY_DN1098_c0_g1_i1.p1	TRINITY_DN3200_c0_g1_i1.p1	TRINITY_DN2695_c0_g1_i2.p2	TRINITY_DN53920_c0_g1_i1.p1	TRINITY_DN22189_c0_g1_i2.p1	TRINITY_DN1727_c0_g1_i1.p1	TRINITY_DN4032_c0_g1_i2.p1	TRINITY_DN7388_c0_g1_i2.p1	TRINITY_DN5458_c0_g1_i1.p1	TRINITY_DN12435_c0_g1_i1.p1	TRINITY_DN1495_c0_g1_i8.p2	TRINITY_DN237_c0_g1_i5.p1	TRINITY_DN32240_c0_g1_i1.p1	TRINITY_DN6446_c0_g1_i3.p1	TRINITY_DN4799_c0_g1_i1.p1	TRINITY_DN39588_c0_g1_i1.p1	TRINITY_DN92093_c0_g1_i1.p1	TRINITY_DN9957_c0_g1_i1.p1
160705at6656	FALSE	38	95	FBpp0081683	TRINITY_DN65879_c0_g1_i1.p1	TRINITY_DN32395_c0_g1_i2.p2	TRINITY_DN42478_c0_g1_i2.p1	c84606_g1_i1.p1	SMAR006697-PA	TRINITY_DN17543_c0_g1_i1.p1	TRINITY_DN11642_c0_g1_i1.p1	TRINITY_DN3758_c0_g1_i1.p1	TRINITY_DN6751_c0_g1_i2.p1	TRINITY_DN22219_c0_g1_i1.p1	TRINITY_DN33748_c0_g1_i1.p1	TRINITY_DN8119_c0_g1_i1.p1	TRINITY_DN29722_c0_g1_i1.p1	TRINITY_DN31045_c0_g1_i1.p1	TRINITY_DN13137_c0_g1_i1.p1	TRINITY_DN18752_c0_g1_i1.p1	TRINITY_DN52418_c0_g2_i1.p1	TRINITY_DN78980_c0_g1_i1.p1	TRINITY_DN7796_c0_g1_i1.p1		TRINITY_DN5251_c0_g1_i1.p1	TRINITY_DN38779_c0_g1_i1.p1	TRINITY_DN22780_c0_g1_i1.p1	TRINITY_DN2968_c0_g1_i2.p1	TRINITY_DN89159_c0_g1_i1.p1	TRINITY_DN1973_c0_g1_i2.p1	TRINITY_DN3431_c0_g1_i1.p2	TRINITY_DN5205_c0_g1_i7.p2	TRINITY_DN5954_c0_g1_i4.p1	TRINITY_DN2046_c0_g1_i1.p1	TRINITY_DN1733_c0_g1_i1.p1	TRINITY_DN2172_c0_g1_i4.p1	TRINITY_DN1632_c0_g1_i1.p1	TRINITY_DN7055_c0_g1_i14.p2	TRINITY_DN6145_c0_g1_i2.p1		TRINITY_DN23449_c0_g2_i1.p1	TRINITY_DN81480_c0_g1_i1.p1	TRINITY_DN11581_c1_g1_i1.p2
9647at6656	TRUE	39	97.5	FBpp0072077	TRINITY_DN7113_c0_g1_i1.p1	TRINITY_DN27802_c0_g2_i1.p1	TRINITY_DN51089_c1_g1_i1.p1	c98114_g1_i1.p1	SMAR009851-PA	TRINITY_DN22595_c0_g3_i1.p1	TRINITY_DN67665_c0_g1_i1.p1	TRINITY_DN19874_c0_g1_i1.p1	TRINITY_DN10606_c0_g1_i1.p1	TRINITY_DN20968_c0_g1_i1.p1	TRINITY_DN7960_c0_g1_i1.p1	TRINITY_DN19059_c0_g1_i1.p1	TRINITY_DN44383_c0_g1_i1.p1	TRINITY_DN1629_c1_g1_i1.p1	TRINITY_DN67623_c0_g1_i1.p1	TRINITY_DN19578_c0_g1_i1.p1	TRINITY_DN98133_c0_g1_i1.p1	TRINITY_DN55619_c0_g1_i1.p1	TRINITY_DN37657_c0_g1_i2.p1		TRINITY_DN38787_c0_g1_i1.p1	TRINITY_DN28574_c0_g1_i1.p1	TRINITY_DN22911_c0_g1_i1.p1	TRINITY_DN18527_c0_g1_i1.p1	TRINITY_DN61812_c0_g1_i1.p1	TRINITY_DN22978_c0_g1_i1.p1	TRINITY_DN20560_c0_g2_i1.p1	TRINITY_DN5604_c0_g1_i6.p1	TRINITY_DN1064_c0_g1_i12.p1	TRINITY_DN12719_c0_g1_i2.p1	TRINITY_DN11764_c0_g1_i1.p1	TRINITY_DN1774_c0_g1_i9.p1	TRINITY_DN1209_c0_g1_i5.p1	TRINITY_DN23129_c0_g1_i1.p1	TRINITY_DN27806_c0_g1_i1.p1	TRINITY_DN2023_c0_g1_i1.p1	TRINITY_DN30914_c0_g1_i3.p1	TRINITY_DN89140_c5_g2_i1.p1	TRINITY_DN11818_c0_g1_i1.p1
99204at6656	TRUE	39	97.5	FBpp0082540	TRINITY_DN67685_c0_g1_i1.p1	TRINITY_DN24677_c0_g2_i1.p1	TRINITY_DN47993_c0_g1_i1.p1	c69510_g1_i2.p1	SMAR006656-PA	TRINITY_DN10831_c0_g1_i1.p1	TRINITY_DN31272_c0_g1_i1.p1	TRINITY_DN2535_c0_g1_i1.p1	TRINITY_DN7011_c0_g1_i1.p1	TRINITY_DN2760_c0_g1_i11.p1	TRINITY_DN1420_c0_g2_i1.p1	TRINITY_DN4942_c0_g1_i1.p1	TRINITY_DN24929_c0_g1_i1.p1	TRINITY_DN3270_c0_g1_i3.p1	TRINITY_DN5047_c0_g1_i1.p1	TRINITY_DN27008_c0_g2_i1.p1	TRINITY_DN69022_c0_g1_i1.p1	TRINITY_DN65811_c0_g2_i1.p1	TRINITY_DN40792_c0_g2_i1.p1	TRINITY_DN54009_c0_g1_i1.p1	TRINITY_DN3640_c0_g1_i1.p1	TRINITY_DN1394_c0_g1_i2.p1	TRINITY_DN1115_c1_g1_i1.p1	TRINITY_DN4778_c0_g1_i12.p1	TRINITY_DN15440_c0_g5_i2.p1	TRINITY_DN6223_c0_g1_i2.p1	TRINITY_DN2276_c0_g1_i7.p1	TRINITY_DN3620_c0_g2_i1.p1	TRINITY_DN178_c0_g1_i16.p1	TRINITY_DN3443_c0_g1_i1.p1	TRINITY_DN3916_c0_g1_i2.p1	TRINITY_DN4949_c0_g1_i9.p1	TRINITY_DN3127_c0_g2_i4.p1	TRINITY_DN14743_c0_g2_i1.p1	TRINITY_DN10468_c0_g1_i1.p1		TRINITY_DN26068_c0_g2_i2.p1	TRINITY_DN81065_c0_g1_i1.p1	TRINITY_DN13288_c2_g2_i1.p1
37030at6656	TRUE	39	97.5	FBpp0073910	TRINITY_DN11077_c0_g1_i1.p1	TRINITY_DN26936_c0_g1_i1.p1	TRINITY_DN48262_c0_g1_i1.p1	c99465_g2_i2.p2	SMAR008818-PA	TRINITY_DN24466_c0_g3_i2.p1	TRINITY_DN29423_c0_g1_i3.p1	TRINITY_DN14122_c0_g1_i1.p1	TRINITY_DN15243_c0_g1_i1.p1	TRINITY_DN21525_c0_g1_i1.p1	TRINITY_DN16856_c0_g1_i1.p1	TRINITY_DN8383_c0_g2_i1.p3	TRINITY_DN39602_c0_g1_i1.p1	TRINITY_DN3830_c0_g1_i3.p1	TRINITY_DN60556_c0_g1_i1.p1	TRINITY_DN31440_c2_g1_i1.p1	TRINITY_DN56702_c0_g2_i1.p1	TRINITY_DN81923_c0_g1_i1.p1	TRINITY_DN6393_c0_g1_i1.p1		TRINITY_DN13165_c0_g1_i5.p1	TRINITY_DN4768_c0_g1_i2.p1	TRINITY_DN13705_c0_g1_i1.p1	TRINITY_DN27809_c0_g1_i1.p1	TRINITY_DN76046_c0_g1_i1.p1	TRINITY_DN20141_c0_g1_i1.p1	TRINITY_DN11805_c0_g1_i1.p1	TRINITY_DN7029_c0_g2_i15.p1	TRINITY_DN794_c0_g3_i2.p1	TRINITY_DN20716_c0_g1_i2.p1	TRINITY_DN7008_c0_g2_i1.p1	TRINITY_DN7141_c0_g1_i6.p1	TRINITY_DN4765_c0_g1_i1.p1	TRINITY_DN11489_c0_g1_i3.p1	TRINITY_DN14052_c0_g1_i1.p1	TRINITY_DN41009_c0_g1_i1.p1	TRINITY_DN31196_c0_g1_i1.p1	TRINITY_DN69818_c0_g1_i1.p1	TRINITY_DN13175_c5_g2_i1.p1
8145at6656	TRUE	39	97.5	FBpp0307917	TRINITY_DN18001_c0_g2_i1.p1	TRINITY_DN28099_c0_g1_i1.p1	TRINITY_DN52857_c0_g1_i3.p1	c74033_g1_i1.p1	SMAR008301-PA	TRINITY_DN27414_c0_g1_i2.p1	TRINITY_DN20679_c0_g1_i1.p1	TRINITY_DN8695_c0_g1_i1.p1	TRINITY_DN6163_c0_g1_i3.p1	TRINITY_DN2450_c0_g1_i1.p1	TRINITY_DN1459_c1_g2_i2.p1	TRINITY_DN34357_c0_g1_i1.p1		TRINITY_DN22274_c0_g1_i1.p1	TRINITY_DN25921_c0_g1_i1.p1	TRINITY_DN32093_c0_g2_i2.p1	TRINITY_DN72625_c0_g1_i1.p1	TRINITY_DN86724_c2_g2_i2.p1	TRINITY_DN34339_c1_g1_i1.p1	TRINITY_DN50582_c0_g1_i1.p1	TRINITY_DN9568_c0_g1_i2.p1	TRINITY_DN12392_c0_g1_i4.p1	TRINITY_DN2545_c0_g1_i25.p1	TRINITY_DN1676_c0_g1_i1.p1	TRINITY_DN88190_c0_g1_i1.p1	TRINITY_DN9443_c0_g1_i1.p1	TRINITY_DN5214_c1_g1_i1.p1	TRINITY_DN1402_c1_g1_i6.p1	TRINITY_DN1331_c1_g1_i22.p1	TRINITY_DN1830_c0_g1_i3.p1	TRINITY_DN3788_c0_g1_i1.p1	TRINITY_DN4791_c0_g1_i4.p1	TRINITY_DN22905_c0_g1_i1.p1	TRINITY_DN2315_c0_g1_i1.p1	TRINITY_DN9498_c0_g1_i1.p1	TRINITY_DN21231_c0_g1_i1.p1	TRINITY_DN31720_c0_g1_i8.p1	TRINITY_DN47316_c0_g1_i1.p1	TRINITY_DN13183_c3_g2_i1.p1
81950at6656	TRUE	39	97.5	FBpp0080017	TRINITY_DN3511_c0_g1_i1.p1	TRINITY_DN30704_c0_g1_i1.p1	TRINITY_DN52470_c1_g2_i2.p1	c99451_g1_i1.p1	SMAR015603-PA	TRINITY_DN19441_c0_g3_i1.p1	TRINITY_DN34474_c0_g1_i1.p1	TRINITY_DN4168_c0_g1_i2.p1	TRINITY_DN2614_c0_g1_i1.p1	TRINITY_DN4258_c0_g1_i1.p1	TRINITY_DN2389_c0_g1_i2.p1	TRINITY_DN2745_c0_g1_i1.p1	TRINITY_DN21956_c0_g1_i1.p1	TRINITY_DN3003_c0_g1_i5.p1	TRINITY_DN22899_c0_g1_i2.p1	TRINITY_DN20209_c0_g1_i1.p1	TRINITY_DN72576_c0_g1_i2.p1	TRINITY_DN80910_c0_g1_i2.p1	TRINITY_DN13107_c0_g2_i1.p1		TRINITY_DN3853_c0_g1_i1.p1	TRINITY_DN46357_c0_g1_i3.p1	TRINITY_DN18274_c0_g1_i1.p1	TRINITY_DN1428_c0_g1_i3.p1	TRINITY_DN73795_c0_g1_i2.p1	TRINITY_DN30268_c0_g1_i1.p1	TRINITY_DN8749_c0_g1_i5.p1	TRINITY_DN5181_c0_g1_i1.p1	TRINITY_DN4698_c0_g1_i2.p1	TRINITY_DN3490_c0_g1_i1.p1	TRINITY_DN1885_c0_g1_i1.p1	TRINITY_DN6843_c0_g1_i2.p1	TRINITY_DN3082_c0_g1_i5.p1	TRINITY_DN8153_c0_g1_i7.p1	TRINITY_DN584_c0_g1_i1.p1	TRINITY_DN22619_c0_g2_i1.p1	TRINITY_DN26468_c1_g1_i1.p1	TRINITY_DN90994_c1_g4_i1.p1	TRINITY_DN14855_c0_g1_i1.p1
95294at6656	TRUE	39	97.5	FBpp0078688	TRINITY_DN9745_c0_g1_i1.p1	TRINITY_DN29127_c0_g1_i2.p1	TRINITY_DN45857_c0_g1_i1.p1	c68514_g1_i1.p1	SMAR010379-PA	TRINITY_DN20831_c0_g1_i2.p1	TRINITY_DN127531_c0_g1_i1.p1	TRINITY_DN31204_c0_g1_i1.p1	TRINITY_DN4644_c0_g1_i3.p1	TRINITY_DN33419_c0_g1_i1.p1	TRINITY_DN21910_c0_g1_i1.p1	TRINITY_DN2452_c0_g2_i1.p1	TRINITY_DN26432_c0_g1_i1.p1	TRINITY_DN6755_c0_g1_i1.p1	TRINITY_DN3085_c0_g1_i1.p1	TRINITY_DN23320_c0_g2_i1.p1	TRINITY_DN73377_c0_g1_i2.p1	TRINITY_DN69049_c0_g1_i1.p1	TRINITY_DN21919_c0_g1_i1.p1		TRINITY_DN2735_c0_g1_i1.p1	TRINITY_DN11200_c0_g1_i2.p1	TRINITY_DN14728_c0_g1_i1.p1	TRINITY_DN16099_c0_g1_i2.p1	TRINITY_DN62802_c0_g2_i1.p1	TRINITY_DN4462_c0_g1_i1.p1	TRINITY_DN1208_c0_g1_i12.p1	TRINITY_DN5152_c0_g1_i3.p1	TRINITY_DN2212_c0_g1_i7.p2	TRINITY_DN16373_c0_g1_i1.p1	TRINITY_DN18694_c0_g1_i1.p1	TRINITY_DN7984_c0_g1_i3.p1	TRINITY_DN6998_c0_g1_i1.p1	TRINITY_DN15472_c0_g1_i4.p1	TRINITY_DN9727_c0_g1_i1.p1	TRINITY_DN24353_c0_g1_i1.p1	TRINITY_DN26944_c0_g1_i1.p1	TRINITY_DN85700_c1_g1_i1.p1	TRINITY_DN16165_c0_g1_i1.p1
24573at6656	FALSE	38	95	FBpp0079111	TRINITY_DN15059_c0_g1_i1.p1	TRINITY_DN33377_c1_g1_i1.p1	TRINITY_DN48570_c0_g1_i1.p1	c78633_g1_i1.p1	SMAR009325-PA	TRINITY_DN27038_c0_g1_i2.p1	TRINITY_DN41376_c1_g3_i1.p1	TRINITY_DN1157_c0_g1_i1.p1	TRINITY_DN4708_c0_g1_i7.p1	TRINITY_DN4610_c0_g1_i4.p1	TRINITY_DN266_c0_g1_i2.p1	TRINITY_DN8440_c0_g1_i8.p1	TRINITY_DN1548_c0_g1_i1.p1	TRINITY_DN3163_c0_g1_i1.p1	TRINITY_DN31189_c0_g1_i1.p1	TRINITY_DN32546_c0_g1_i2.p1	TRINITY_DN72891_c0_g2_i3.p1	TRINITY_DN84440_c2_g1_i1.p1			TRINITY_DN5965_c0_g1_i12.p1	TRINITY_DN25658_c0_g1_i1.p1	TRINITY_DN5300_c0_g1_i1.p1	TRINITY_DN2554_c0_g1_i1.p1	TRINITY_DN2298_c0_g1_i1.p1	TRINITY_DN9083_c3_g1_i9.p1	TRINITY_DN2055_c1_g1_i2.p1	TRINITY_DN4488_c0_g1_i7.p1	TRINITY_DN5049_c0_g1_i5.p1	TRINITY_DN31362_c0_g1_i2.p1	TRINITY_DN210_c0_g1_i3.p1	TRINITY_DN81774_c0_g1_i2.p1	TRINITY_DN1954_c1_g1_i2.p1	TRINITY_DN2218_c0_g1_i9.p1	TRINITY_DN22084_c0_g1_i2.p1	TRINITY_DN26287_c0_g1_i1.p1	TRINITY_DN28078_c0_g2_i2.p1	TRINITY_DN87867_c0_g1_i3.p1	TRINITY_DN10047_c0_g1_i1.p1
26653at6656	FALSE	38	95	FBpp0076284	TRINITY_DN14575_c0_g1_i1.p1	TRINITY_DN34609_c0_g1_i17.p1	TRINITY_DN39420_c0_g1_i2.p1	c90857_g3_i2.p1		TRINITY_DN22555_c0_g1_i1.p1	TRINITY_DN35309_c0_g1_i3.p1	TRINITY_DN2347_c0_g1_i1.p1	TRINITY_DN1134_c0_g1_i2.p1	TRINITY_DN4136_c0_g1_i2.p1	TRINITY_DN349_c0_g1_i2.p1	TRINITY_DN4488_c0_g2_i1.p1	TRINITY_DN5843_c0_g1_i1.p1	TRINITY_DN4731_c0_g1_i1.p1	TRINITY_DN27287_c0_g1_i3.p1	TRINITY_DN32741_c0_g1_i1.p1	TRINITY_DN71044_c0_g2_i1.p1	TRINITY_DN87637_c0_g1_i1.p1	TRINITY_DN82195_c0_g1_i1.p1		TRINITY_DN2032_c2_g1_i1.p1	TRINITY_DN2254_c0_g1_i1.p1	TRINITY_DN5617_c0_g1_i1.p1	TRINITY_DN9136_c0_g1_i1.p1	TRINITY_DN11624_c0_g1_i2.p1	TRINITY_DN31124_c0_g1_i1.p1	TRINITY_DN4395_c0_g1_i4.p1	TRINITY_DN3631_c0_g1_i1.p1	TRINITY_DN2752_c0_g1_i16.p1	TRINITY_DN18510_c0_g1_i2.p1	TRINITY_DN11437_c0_g1_i1.p1	TRINITY_DN1463_c0_g1_i4.p1	TRINITY_DN15126_c0_g1_i1.p1	TRINITY_DN1206_c0_g1_i2.p1	TRINITY_DN948_c0_g1_i1.p1	TRINITY_DN24874_c0_g1_i1.p1	TRINITY_DN31359_c0_g1_i1.p1	TRINITY_DN66076_c0_g1_i1.p1	TRINITY_DN12820_c0_g1_i1.p1
31480at6656	FALSE	39	97.5	FBpp0080324	TRINITY_DN55286_c0_g1_i1.p1	TRINITY_DN30267_c0_g2_i1.p1	TRINITY_DN51094_c0_g1_i1.p1	c89645_g2_i1.p1	SMAR000421-PA	TRINITY_DN22452_c0_g1_i1.p1	TRINITY_DN41235_c0_g1_i2.p1	TRINITY_DN1682_c0_g1_i6.p1	TRINITY_DN837_c0_g1_i3.p1	TRINITY_DN6926_c0_g1_i1.p1	TRINITY_DN1852_c0_g1_i3.p1	TRINITY_DN5514_c1_g1_i1.p1		TRINITY_DN2365_c0_g1_i1.p1	TRINITY_DN90002_c0_g1_i1.p1	TRINITY_DN32374_c3_g20_i1.p1	TRINITY_DN72624_c1_g1_i1.p1	TRINITY_DN83729_c0_g1_i2.p1	TRINITY_DN35547_c0_g1_i1.p1	TRINITY_DN28698_c0_g1_i1.p1	TRINITY_DN7411_c0_g1_i1.p1	TRINITY_DN6044_c0_g1_i2.p1	TRINITY_DN1839_c0_g1_i1.p1	TRINITY_DN4001_c0_g1_i2.p1	TRINITY_DN48161_c0_g1_i3.p1	TRINITY_DN10992_c0_g1_i1.p1	TRINITY_DN816_c0_g1_i8.p1	TRINITY_DN8842_c0_g1_i3.p1	TRINITY_DN1405_c0_g2_i2.p1	TRINITY_DN3481_c0_g1_i3.p1	TRINITY_DN29838_c0_g1_i1.p1	TRINITY_DN2622_c0_g1_i2.p1	TRINITY_DN5982_c0_g1_i3.p1	TRINITY_DN1521_c0_g1_i6.p1	TRINITY_DN2792_c1_g1_i1.p1	TRINITY_DN13284_c0_g2_i1.p1	TRINITY_DN16503_c0_g1_i1.p1	TRINITY_DN76479_c0_g1_i1.p1	TRINITY_DN9976_c0_g2_i1.p1
103747at6656	TRUE	39	97.5	FBpp0086616	TRINITY_DN16314_c0_g1_i1.p1	TRINITY_DN31948_c0_g1_i1.p1	TRINITY_DN48830_c0_g1_i2.p1	c95943_g1_i1.p1	SMAR009721-PA	TRINITY_DN24959_c0_g4_i2.p1	TRINITY_DN26668_c0_g1_i2.p1	TRINITY_DN12126_c0_g1_i3.p1	TRINITY_DN736_c0_g1_i40.p2	TRINITY_DN7975_c0_g1_i1.p1	TRINITY_DN3944_c0_g1_i7.p1	TRINITY_DN23901_c0_g1_i1.p1	TRINITY_DN4574_c0_g1_i2.p1	TRINITY_DN818_c0_g1_i1.p1	TRINITY_DN62106_c0_g1_i1.p1	TRINITY_DN17775_c0_g1_i1.p1	TRINITY_DN104016_c0_g1_i1.p1	TRINITY_DN74719_c0_g1_i1.p1	TRINITY_DN42975_c1_g1_i1.p1		TRINITY_DN21593_c0_g2_i1.p1	TRINITY_DN45400_c0_g1_i1.p1	TRINITY_DN9689_c0_g1_i2.p1	TRINITY_DN3515_c0_g1_i6.p1	TRINITY_DN33500_c0_g1_i1.p1	TRINITY_DN4420_c0_g1_i1.p1	TRINITY_DN12840_c0_g1_i10.p1	TRINITY_DN18559_c0_g1_i21.p1	TRINITY_DN1623_c0_g1_i2.p1	TRINITY_DN6404_c1_g1_i3.p1	TRINITY_DN18325_c0_g1_i2.p1	TRINITY_DN3671_c0_g1_i1.p1	TRINITY_DN3157_c0_g1_i22.p1	TRINITY_DN8427_c0_g1_i17.p1	TRINITY_DN23325_c0_g1_i1.p1	TRINITY_DN24353_c0_g5_i1.p1	TRINITY_DN21573_c0_g1_i1.p1	TRINITY_DN20081_c0_g1_i1.p1	TRINITY_DN13300_c0_g1_i1.p1
38303at6656	FALSE	38	95	FBpp0087764	TRINITY_DN25554_c0_g1_i1.p1	TRINITY_DN30859_c0_g1_i2.p2	TRINITY_DN49626_c0_g1_i1.p1	c78386_g1_i1.p1	SMAR015060-PA	TRINITY_DN16896_c0_g1_i2.p1	TRINITY_DN42127_c0_g1_i2.p1	TRINITY_DN1897_c0_g1_i1.p1	TRINITY_DN26678_c0_g1_i1.p1	TRINITY_DN532_c0_g1_i1.p1	TRINITY_DN3811_c0_g1_i1.p1	TRINITY_DN814_c0_g1_i1.p1		TRINITY_DN838_c3_g1_i1.p1	TRINITY_DN27918_c0_g1_i1.p1	TRINITY_DN20984_c0_g1_i1.p1	TRINITY_DN71463_c0_g1_i1.p1	TRINITY_DN83066_c0_g1_i1.p1		TRINITY_DN74529_c0_g1_i1.p1	TRINITY_DN3174_c0_g1_i1.p1	TRINITY_DN3060_c0_g1_i1.p1	TRINITY_DN3374_c0_g1_i1.p1	TRINITY_DN719_c0_g1_i1.p1	TRINITY_DN30651_c0_g1_i1.p1	TRINITY_DN1045_c0_g1_i2.p1	TRINITY_DN1524_c0_g1_i2.p1	TRINITY_DN2857_c0_g1_i1.p1	TRINITY_DN18453_c0_g2_i1.p1	TRINITY_DN27330_c0_g1_i1.p1	TRINITY_DN179_c0_g1_i5.p1	TRINITY_DN957_c0_g1_i1.p1	TRINITY_DN14841_c0_g1_i1.p1	TRINITY_DN5859_c0_g1_i3.p1	TRINITY_DN366_c0_g1_i2.p1	TRINITY_DN39709_c0_g1_i1.p1	TRINITY_DN23280_c0_g1_i1.p1	TRINITY_DN101051_c0_g1_i1.p1	TRINITY_DN12804_c0_g1_i1.p1
133949at6656	TRUE	39	97.5	FBpp0077400	TRINITY_DN15808_c0_g2_i1.p1	TRINITY_DN50646_c0_g1_i1.p1	TRINITY_DN43934_c0_g1_i1.p1	c51866_g1_i1.p1	SMAR013604-PA	TRINITY_DN23616_c0_g2_i1.p1	TRINITY_DN67326_c0_g1_i1.p1	TRINITY_DN38142_c0_g1_i1.p1	TRINITY_DN9749_c0_g1_i2.p1	TRINITY_DN3346_c0_g1_i1.p1	TRINITY_DN9546_c0_g1_i1.p1	TRINITY_DN12202_c0_g1_i1.p1	TRINITY_DN3491_c0_g1_i1.p1	TRINITY_DN4284_c0_g1_i1.p1	TRINITY_DN24069_c0_g1_i1.p1	TRINITY_DN33649_c7_g1_i2.p1	TRINITY_DN71512_c2_g1_i1.p1	TRINITY_DN82850_c0_g1_i2.p1		TRINITY_DN23127_c0_g1_i1.p1	TRINITY_DN2945_c0_g1_i3.p1	TRINITY_DN24865_c0_g1_i1.p1	TRINITY_DN4565_c0_g1_i1.p2	TRINITY_DN5133_c0_g1_i1.p1	TRINITY_DN40459_c0_g1_i1.p1	TRINITY_DN63602_c0_g1_i1.p1	TRINITY_DN8355_c0_g1_i2.p1	TRINITY_DN8475_c0_g1_i1.p1	TRINITY_DN3885_c0_g1_i2.p1	TRINITY_DN7200_c0_g1_i1.p1	TRINITY_DN920_c0_g1_i1.p1	TRINITY_DN10392_c0_g1_i4.p1	TRINITY_DN247_c0_g1_i4.p2	TRINITY_DN2507_c1_g1_i6.p1	TRINITY_DN5261_c0_g1_i1.p1	TRINITY_DN10678_c0_g1_i2.p1	TRINITY_DN14873_c0_g1_i2.p1	TRINITY_DN85450_c0_g1_i1.p1	TRINITY_DN10873_c3_g1_i1.p1
78695at6656	TRUE	39	97.5	FBpp0079294	TRINITY_DN66380_c0_g1_i1.p1	TRINITY_DN25037_c0_g1_i1.p1	TRINITY_DN48264_c0_g1_i1.p1	c91605_g1_i2.p1	SMAR008661-PA	TRINITY_DN25522_c0_g1_i3.p1	TRINITY_DN2642_c0_g1_i1.p1	TRINITY_DN27712_c0_g1_i1.p1	TRINITY_DN3690_c0_g1_i1.p1	TRINITY_DN5000_c0_g1_i1.p1	TRINITY_DN24931_c0_g1_i1.p1	TRINITY_DN41422_c0_g1_i1.p1	TRINITY_DN6838_c0_g5_i2.p1	TRINITY_DN5580_c0_g1_i4.p1	TRINITY_DN37953_c0_g1_i1.p1	TRINITY_DN25490_c0_g2_i2.p1	TRINITY_DN73617_c1_g4_i1.p1	TRINITY_DN87204_c0_g1_i1.p2	TRINITY_DN44233_c0_g1_i1.p1		TRINITY_DN8570_c0_g1_i2.p1	TRINITY_DN6039_c0_g1_i1.p1	TRINITY_DN24507_c0_g1_i1.p1	TRINITY_DN41188_c0_g1_i1.p1	TRINITY_DN64338_c0_g1_i1.p1	TRINITY_DN2373_c0_g2_i1.p1	TRINITY_DN11043_c0_g1_i1.p1	TRINITY_DN7800_c0_g1_i5.p1	TRINITY_DN3651_c0_g1_i6.p1	TRINITY_DN6814_c0_g2_i2.p1	TRINITY_DN23308_c0_g1_i1.p1	TRINITY_DN5240_c0_g1_i10.p1	TRINITY_DN1431_c0_g1_i8.p2	TRINITY_DN5004_c0_g1_i4.p1	TRINITY_DN10017_c0_g1_i2.p1	TRINITY_DN19029_c0_g1_i1.p1	TRINITY_DN29564_c0_g1_i1.p1	TRINITY_DN85926_c1_g3_i2.p1	TRINITY_DN8958_c0_g1_i1.p1
58027at6656	TRUE	39	97.5	FBpp0071426	TRINITY_DN14165_c0_g2_i1.p1	TRINITY_DN34509_c0_g1_i4.p2	TRINITY_DN52035_c0_g2_i3.p2	c90683_g1_i1.p1	SMAR000428-PA	TRINITY_DN27819_c0_g1_i4.p1	TRINITY_DN37568_c0_g1_i2.p1	TRINITY_DN17123_c0_g1_i2.p1	TRINITY_DN2053_c0_g1_i8.p1	TRINITY_DN4361_c0_g2_i2.p1	TRINITY_DN2773_c0_g1_i3.p1	TRINITY_DN10465_c0_g1_i1.p1	TRINITY_DN54334_c0_g1_i1.p1	TRINITY_DN31313_c0_g1_i1.p1	TRINITY_DN25337_c2_g3_i2.p1	TRINITY_DN32487_c1_g9_i3.p1	TRINITY_DN72137_c0_g1_i1.p1	TRINITY_DN85185_c0_g1_i1.p1	TRINITY_DN25653_c0_g2_i1.p1		TRINITY_DN1637_c1_g2_i2.p1	TRINITY_DN47398_c0_g1_i1.p1	TRINITY_DN3592_c0_g1_i3.p1	TRINITY_DN2216_c0_g1_i7.p2	TRINITY_DN77388_c0_g1_i1.p1	TRINITY_DN12708_c0_g1_i5.p1	TRINITY_DN6356_c0_g1_i3.p1	TRINITY_DN5091_c1_g1_i22.p1	TRINITY_DN1030_c1_g1_i6.p1	TRINITY_DN8647_c0_g1_i5.p1	TRINITY_DN1157_c0_g1_i6.p1	TRINITY_DN47692_c0_g1_i1.p1	TRINITY_DN3915_c0_g1_i3.p1	TRINITY_DN8370_c0_g1_i6.p1	TRINITY_DN14520_c0_g1_i1.p1	TRINITY_DN25542_c0_g5_i1.p1	TRINITY_DN28875_c0_g2_i1.p1	TRINITY_DN76776_c0_g1_i2.p1	TRINITY_DN13144_c0_g1_i1.p1
106639at6656	TRUE	38	95	FBpp0086400	TRINITY_DN7403_c0_g1_i1.p1	TRINITY_DN50384_c0_g1_i1.p1	TRINITY_DN37728_c0_g1_i1.p1	c86149_g1_i1.p1		TRINITY_DN20188_c0_g2_i1.p1	TRINITY_DN126032_c0_g1_i1.p1	TRINITY_DN141_c0_g1_i12.p2	TRINITY_DN26204_c0_g1_i1.p2	TRINITY_DN9133_c0_g1_i1.p1	TRINITY_DN6707_c0_g1_i1.p1	TRINITY_DN2344_c0_g1_i1.p1		TRINITY_DN14423_c0_g1_i1.p1	TRINITY_DN14464_c0_g1_i1.p1	TRINITY_DN11303_c0_g1_i1.p1	TRINITY_DN72306_c0_g1_i1.p1	TRINITY_DN82282_c0_g1_i1.p1	TRINITY_DN45183_c1_g1_i1.p1	TRINITY_DN21339_c0_g1_i1.p1	TRINITY_DN48226_c0_g1_i1.p1	TRINITY_DN32126_c0_g1_i1.p1	TRINITY_DN827_c0_g2_i1.p1	TRINITY_DN7846_c0_g2_i2.p1	TRINITY_DN1901_c0_g1_i1.p1	TRINITY_DN600_c0_g1_i2.p1	TRINITY_DN2341_c0_g1_i1.p1	TRINITY_DN7111_c0_g1_i1.p1	TRINITY_DN3279_c0_g1_i5.p1	TRINITY_DN3620_c0_g1_i1.p1	TRINITY_DN955_c3_g1_i1.p1	TRINITY_DN518_c0_g1_i2.p1	TRINITY_DN3012_c0_g1_i1.p2	TRINITY_DN4435_c0_g1_i1.p1	TRINITY_DN10052_c0_g1_i1.p1	TRINITY_DN39880_c0_g1_i1.p1	TRINITY_DN26863_c0_g1_i1.p1	TRINITY_DN62662_c0_g1_i1.p1	TRINITY_DN16375_c0_g1_i1.p1
112360at6656	TRUE	38	95	FBpp0074822	TRINITY_DN16173_c0_g1_i1.p1	TRINITY_DN28463_c0_g1_i1.p1	TRINITY_DN23554_c0_g2_i1.p1	c34910_g1_i1.p1	SMAR002483-PA	TRINITY_DN26093_c0_g4_i1.p1	TRINITY_DN32155_c1_g1_i1.p1	TRINITY_DN11011_c0_g1_i4.p1	TRINITY_DN996_c0_g1_i1.p2	TRINITY_DN31034_c0_g2_i1.p1	TRINITY_DN11434_c0_g1_i1.p1	TRINITY_DN40612_c0_g1_i1.p1	TRINITY_DN36796_c0_g1_i1.p1	TRINITY_DN21651_c0_g1_i1.p1	TRINITY_DN12512_c0_g2_i1.p1	TRINITY_DN31166_c1_g3_i3.p1	TRINITY_DN64383_c0_g1_i2.p1	TRINITY_DN80569_c1_g1_i2.p2	TRINITY_DN9877_c0_g1_i1.p1		TRINITY_DN28924_c0_g1_i2.p1	TRINITY_DN4981_c0_g1_i2.p1	TRINITY_DN1853_c0_g1_i3.p1	TRINITY_DN41329_c0_g1_i1.p1	TRINITY_DN74216_c0_g1_i1.p1	TRINITY_DN65926_c0_g1_i1.p1	TRINITY_DN2955_c0_g3_i1.p1	TRINITY_DN2839_c0_g1_i15.p1	TRINITY_DN2287_c0_g1_i19.p3	TRINITY_DN2228_c0_g1_i2.p1	TRINITY_DN23623_c0_g1_i1.p1	TRINITY_DN1434_c0_g1_i4.p1	TRINITY_DN3424_c0_g1_i2.p1	TRINITY_DN6028_c0_g1_i2.p1	TRINITY_DN14591_c0_g1_i1.p1		TRINITY_DN28308_c0_g1_i3.p1	TRINITY_DN9944_c0_g1_i1.p1	TRINITY_DN13351_c2_g1_i1.p1
164354at6656	TRUE	38	95	FBpp0073777	TRINITY_DN14977_c0_g5_i1.p1	TRINITY_DN22876_c0_g1_i1.p3	TRINITY_DN97341_c0_g1_i1.p1	c62452_g1_i2.p1	SMAR007582-PA	TRINITY_DN21627_c0_g1_i1.p1	TRINITY_DN43061_c0_g4_i2.p1	TRINITY_DN1288_c0_g1_i1.p1	TRINITY_DN5284_c0_g2_i3.p3	TRINITY_DN1231_c0_g1_i1.p1	TRINITY_DN7686_c0_g1_i4.p1	TRINITY_DN10722_c0_g1_i2.p1	TRINITY_DN853_c0_g1_i1.p1	TRINITY_DN12781_c0_g1_i1.p1		TRINITY_DN31505_c19_g2_i1.p3	TRINITY_DN67333_c1_g2_i1.p1	TRINITY_DN1643_c0_g1_i1.p1		TRINITY_DN78313_c0_g1_i1.p1	TRINITY_DN44215_c0_g1_i1.p1	TRINITY_DN5530_c0_g1_i1.p1	TRINITY_DN536_c0_g1_i1.p1	TRINITY_DN5701_c0_g1_i1.p1	TRINITY_DN11255_c0_g1_i3.p1	TRINITY_DN1719_c0_g1_i2.p1	TRINITY_DN34864_c0_g1_i1.p1	TRINITY_DN9323_c0_g1_i7.p3	TRINITY_DN6670_c0_g1_i2.p1	TRINITY_DN3027_c0_g1_i2.p1	TRINITY_DN339_c0_g1_i1.p1	TRINITY_DN337_c0_g1_i3.p1	TRINITY_DN1720_c0_g1_i3.p1	TRINITY_DN2362_c0_g1_i2.p1	TRINITY_DN4816_c0_g1_i5.p1	TRINITY_DN15414_c0_g1_i1.p1	TRINITY_DN22227_c0_g1_i1.p2	TRINITY_DN21765_c0_g1_i1.p1	TRINITY_DN11396_c0_g1_i1.p1
21019at6656	TRUE	38	95	FBpp0085860	TRINITY_DN15939_c0_g2_i1.p1	TRINITY_DN27979_c0_g1_i1.p1	TRINITY_DN41901_c0_g1_i1.p1	c97794_g1_i2.p1	SMAR008445-PA	TRINITY_DN29092_c0_g1_i1.p1	TRINITY_DN39074_c1_g1_i2.p1	TRINITY_DN1549_c0_g1_i1.p1	TRINITY_DN60_c0_g1_i1.p1	TRINITY_DN2731_c0_g1_i2.p1	TRINITY_DN749_c0_g1_i1.p1	TRINITY_DN3885_c0_g1_i9.p1	TRINITY_DN44673_c0_g1_i2.p1	TRINITY_DN1013_c0_g1_i1.p1	TRINITY_DN25463_c0_g1_i1.p1	TRINITY_DN31686_c7_g1_i1.p1	TRINITY_DN64307_c0_g1_i1.p1	TRINITY_DN95889_c0_g1_i1.p1		TRINITY_DN29118_c0_g1_i1.p1	TRINITY_DN882_c0_g1_i2.p1		TRINITY_DN2009_c0_g1_i1.p1	TRINITY_DN363_c0_g1_i12.p1	TRINITY_DN11904_c1_g1_i4.p1	TRINITY_DN15804_c0_g1_i2.p1	TRINITY_DN9952_c0_g1_i1.p1	TRINITY_DN1156_c0_g1_i12.p1	TRINITY_DN1011_c0_g1_i24.p1	TRINITY_DN650_c0_g1_i2.p1	TRINITY_DN1825_c0_g1_i5.p1	TRINITY_DN2031_c0_g2_i2.p1	TRINITY_DN2044_c0_g1_i6.p1	TRINITY_DN1399_c0_g1_i2.p1	TRINITY_DN32_c0_g1_i1.p1	TRINITY_DN43573_c0_g2_i1.p1	TRINITY_DN31894_c0_g2_i1.p1	TRINITY_DN88222_c1_g1_i1.p1	TRINITY_DN14240_c0_g1_i1.p1
31333at6656	TRUE	38	95	FBpp0086097	TRINITY_DN8448_c0_g2_i1.p1	TRINITY_DN61836_c0_g1_i1.p1	TRINITY_DN52549_c0_g1_i1.p1	c92006_g5_i1.p1	SMAR005326-PA	TRINITY_DN17925_c0_g2_i1.p1	TRINITY_DN27719_c0_g1_i1.p1	TRINITY_DN1381_c0_g1_i1.p1	TRINITY_DN5922_c0_g1_i1.p1	TRINITY_DN710_c0_g1_i3.p1	TRINITY_DN17931_c0_g1_i1.p1	TRINITY_DN5257_c0_g1_i4.p1		TRINITY_DN402_c0_g2_i1.p1	TRINITY_DN26028_c0_g1_i1.p1	TRINITY_DN30783_c0_g3_i1.p1	TRINITY_DN71124_c2_g3_i2.p1	TRINITY_DN86218_c0_g1_i1.p1	TRINITY_DN39932_c0_g1_i2.p1	TRINITY_DN57597_c0_g1_i1.p1	TRINITY_DN881_c0_g1_i2.p1		TRINITY_DN1935_c0_g1_i2.p1	TRINITY_DN307_c0_g1_i2.p1	TRINITY_DN73315_c0_g1_i1.p1	TRINITY_DN14420_c0_g1_i2.p1	TRINITY_DN2640_c0_g1_i4.p1	TRINITY_DN2388_c0_g1_i1.p1	TRINITY_DN4375_c0_g1_i1.p1	TRINITY_DN4271_c0_g1_i1.p1	TRINITY_DN2696_c0_g1_i1.p1	TRINITY_DN1089_c0_g1_i7.p1	TRINITY_DN11309_c0_g1_i1.p1	TRINITY_DN3432_c0_g1_i2.p1	TRINITY_DN1864_c0_g1_i1.p1	TRINITY_DN24142_c0_g1_i1.p1	TRINITY_DN31687_c0_g1_i1.p1	TRINITY_DN78581_c0_g1_i2.p1	TRINITY_DN16051_c0_g1_i1.p1
116401at6656	TRUE	38	95	FBpp0070162	TRINITY_DN5867_c0_g2_i1.p1	TRINITY_DN32250_c1_g2_i1.p1	TRINITY_DN46683_c0_g1_i1.p1	c87290_g2_i1.p1	SMAR001707-PA	TRINITY_DN18723_c0_g1_i1.p1	TRINITY_DN5764_c0_g1_i1.p1	TRINITY_DN672_c0_g1_i1.p1	TRINITY_DN239_c0_g1_i1.p1	TRINITY_DN340_c0_g1_i2.p2	TRINITY_DN5039_c0_g2_i1.p1	TRINITY_DN27848_c0_g1_i1.p1		TRINITY_DN13780_c0_g1_i1.p1	TRINITY_DN32043_c1_g1_i1.p1	TRINITY_DN32998_c6_g3_i1.p2	TRINITY_DN60171_c0_g2_i1.p1	TRINITY_DN14448_c0_g1_i1.p1	TRINITY_DN43527_c0_g1_i3.p1	TRINITY_DN13006_c0_g2_i1.p1	TRINITY_DN38180_c0_g1_i1.p1	TRINITY_DN359_c0_g1_i1.p1	TRINITY_DN820_c0_g1_i1.p1	TRINITY_DN718_c0_g1_i1.p1	TRINITY_DN850_c0_g1_i2.p1	TRINITY_DN50783_c0_g1_i1.p1	TRINITY_DN3830_c1_g2_i46.p2	TRINITY_DN2178_c0_g1_i6.p2		TRINITY_DN5777_c0_g1_i6.p1	TRINITY_DN1489_c0_g1_i3.p1	TRINITY_DN681_c0_g1_i16.p1	TRINITY_DN1665_c0_g1_i53.p2	TRINITY_DN1079_c0_g1_i28.p1	TRINITY_DN337_c0_g1_i1.p1	TRINITY_DN31980_c0_g1_i1.p1	TRINITY_DN30829_c0_g3_i2.p1	TRINITY_DN48485_c0_g1_i2.p1	TRINITY_DN11373_c0_g1_i1.p1
116608at6656	TRUE	38	95	FBpp0077859	TRINITY_DN9979_c0_g2_i1.p1	TRINITY_DN16787_c0_g1_i1.p3	TRINITY_DN39258_c0_g1_i1.p1	c61621_g1_i1.p1	SMAR012057-PA	TRINITY_DN20070_c0_g1_i1.p1	TRINITY_DN19046_c0_g2_i1.p1	TRINITY_DN1062_c0_g1_i2.p1	TRINITY_DN2745_c0_g1_i10.p2	TRINITY_DN8336_c0_g1_i1.p1	TRINITY_DN3427_c0_g1_i7.p1	TRINITY_DN7054_c0_g1_i1.p1		TRINITY_DN148_c0_g1_i1.p1	TRINITY_DN29537_c1_g2_i1.p1	TRINITY_DN32180_c0_g1_i1.p1	TRINITY_DN71592_c0_g1_i2.p1	TRINITY_DN84362_c0_g1_i1.p1		TRINITY_DN50557_c0_g1_i1.p1	TRINITY_DN2941_c1_g1_i1.p1	TRINITY_DN24201_c0_g1_i2.p1	TRINITY_DN917_c0_g1_i1.p1	TRINITY_DN2687_c0_g1_i1.p1	TRINITY_DN3641_c0_g1_i1.p1	TRINITY_DN1110_c0_g1_i2.p1	TRINITY_DN824_c0_g4_i3.p1	TRINITY_DN814_c0_g1_i11.p1	TRINITY_DN3952_c0_g1_i5.p1	TRINITY_DN7768_c0_g1_i1.p1	TRINITY_DN700_c0_g1_i1.p1	TRINITY_DN3728_c0_g1_i1.p1	TRINITY_DN11396_c0_g1_i1.p1	TRINITY_DN4098_c0_g1_i4.p1	TRINITY_DN1837_c0_g1_i2.p1	TRINITY_DN4002_c0_g1_i1.p1	TRINITY_DN22496_c0_g1_i1.p1	TRINITY_DN37858_c0_g1_i1.p1	TRINITY_DN13882_c0_g1_i1.p1
12029at6656	TRUE	38	95	FBpp0072743	TRINITY_DN17963_c0_g1_i1.p1	TRINITY_DN25915_c0_g1_i1.p1	TRINITY_DN51120_c1_g1_i1.p1	c100018_g1_i1.p1	SMAR007646-PA	TRINITY_DN28198_c0_g1_i1.p1	TRINITY_DN43147_c0_g1_i7.p1	TRINITY_DN238_c0_g1_i1.p1	TRINITY_DN2023_c0_g1_i5.p1	TRINITY_DN21431_c0_g1_i1.p1	TRINITY_DN4014_c0_g1_i2.p1	TRINITY_DN41002_c0_g1_i1.p1	TRINITY_DN3144_c0_g1_i1.p1	TRINITY_DN1887_c0_g1_i2.p1	TRINITY_DN24519_c0_g1_i1.p1	TRINITY_DN29952_c0_g5_i1.p1		TRINITY_DN84618_c0_g2_i1.p1	TRINITY_DN379_c0_g2_i1.p1	TRINITY_DN37884_c0_g1_i1.p3	TRINITY_DN170_c1_g1_i1.p1		TRINITY_DN2527_c0_g1_i1.p1	TRINITY_DN14365_c0_g1_i1.p1	TRINITY_DN36447_c0_g1_i1.p1	TRINITY_DN3985_c0_g1_i1.p2	TRINITY_DN2225_c0_g1_i8.p1	TRINITY_DN2292_c0_g2_i2.p1	TRINITY_DN2699_c0_g1_i1.p1	TRINITY_DN5659_c0_g1_i1.p1	TRINITY_DN9777_c0_g1_i1.p1	TRINITY_DN2649_c1_g1_i2.p1	TRINITY_DN1078_c0_g1_i20.p1	TRINITY_DN24062_c0_g1_i3.p1	TRINITY_DN22107_c0_g1_i1.p1	TRINITY_DN25256_c0_g1_i1.p1	TRINITY_DN27905_c0_g6_i3.p1	TRINITY_DN91853_c3_g4_i1.p1	TRINITY_DN6172_c0_g1_i1.p1
120383at6656	TRUE	38	95	FBpp0085121	TRINITY_DN68031_c0_g1_i1.p1	TRINITY_DN24324_c0_g1_i1.p2	TRINITY_DN84161_c0_g1_i1.p2	c76081_g1_i1.p1	SMAR007093-PA	TRINITY_DN16763_c0_g2_i1.p1	TRINITY_DN68339_c0_g1_i1.p1	TRINITY_DN3446_c0_g1_i5.p2	TRINITY_DN21877_c0_g1_i1.p1	TRINITY_DN214_c0_g1_i5.p2	TRINITY_DN8893_c0_g1_i1.p1	TRINITY_DN22656_c0_g1_i2.p1	TRINITY_DN634_c0_g2_i2.p2	TRINITY_DN17215_c0_g1_i1.p3	TRINITY_DN13083_c0_g1_i1.p1	TRINITY_DN73857_c0_g1_i1.p1	TRINITY_DN68187_c0_g1_i2.p1	TRINITY_DN81294_c0_g1_i3.p1	TRINITY_DN37019_c0_g1_i1.p1		TRINITY_DN12960_c0_g1_i1.p1	TRINITY_DN4220_c0_g1_i2.p1	TRINITY_DN3780_c0_g1_i3.p1	TRINITY_DN2781_c0_g3_i2.p2	TRINITY_DN1333_c0_g1_i2.p2	TRINITY_DN1896_c0_g1_i2.p2	TRINITY_DN4841_c1_g1_i2.p1	TRINITY_DN1556_c0_g1_i1.p1	TRINITY_DN2145_c0_g1_i8.p1	TRINITY_DN3852_c0_g1_i2.p1	TRINITY_DN28362_c0_g1_i1.p1	TRINITY_DN6466_c0_g1_i10.p1	TRINITY_DN3051_c0_g1_i1.p2	TRINITY_DN9895_c0_g1_i2.p1	TRINITY_DN28988_c0_g1_i1.p1		TRINITY_DN23528_c0_g1_i2.p1	TRINITY_DN9394_c0_g1_i1.p1	TRINITY_DN10786_c0_g2_i1.p2
122665at6656	TRUE	38	95	FBpp0078024	TRINITY_DN1140_c0_g2_i1.p1	TRINITY_DN26960_c0_g2_i2.p2	TRINITY_DN41677_c0_g1_i1.p1	c66292_g1_i1.p1	SMAR004122-PA	TRINITY_DN24429_c0_g1_i1.p1	TRINITY_DN42380_c0_g2_i2.p1	TRINITY_DN4590_c0_g1_i2.p1	TRINITY_DN4822_c0_g1_i2.p1	TRINITY_DN4359_c0_g1_i3.p1	TRINITY_DN3614_c0_g2_i1.p1	TRINITY_DN2098_c0_g1_i3.p1		TRINITY_DN503_c0_g1_i1.p1	TRINITY_DN21071_c0_g1_i1.p1	TRINITY_DN33134_c0_g1_i1.p1	TRINITY_DN66676_c0_g1_i1.p1	TRINITY_DN52495_c0_g1_i1.p1		TRINITY_DN45301_c0_g2_i1.p1	TRINITY_DN3328_c0_g1_i1.p1	TRINITY_DN9668_c0_g1_i1.p1	TRINITY_DN746_c0_g1_i1.p1	TRINITY_DN2256_c0_g1_i1.p1	TRINITY_DN4306_c0_g1_i3.p1	TRINITY_DN12627_c0_g1_i2.p1	TRINITY_DN3223_c0_g1_i1.p1	TRINITY_DN10630_c0_g1_i6.p1	TRINITY_DN3151_c0_g1_i4.p1	TRINITY_DN822_c0_g1_i1.p1	TRINITY_DN3212_c0_g1_i2.p1	TRINITY_DN2559_c0_g1_i10.p1	TRINITY_DN1570_c0_g1_i1.p1	TRINITY_DN1991_c0_g1_i3.p1	TRINITY_DN2515_c0_g2_i1.p1	TRINITY_DN35314_c0_g1_i1.p1	TRINITY_DN16963_c0_g1_i1.p1	TRINITY_DN168901_c0_g1_i1.p1	TRINITY_DN2625_c0_g1_i1.p1
66366at6656	FALSE	38	95	FBpp0305420	TRINITY_DN18254_c0_g1_i1.p1	TRINITY_DN24863_c0_g1_i1.p1	TRINITY_DN50112_c0_g1_i1.p1	c91911_g1_i1.p1	SMAR013430-PA	TRINITY_DN23525_c0_g1_i1.p1	TRINITY_DN39431_c0_g1_i2.p1	TRINITY_DN4066_c0_g1_i2.p1	TRINITY_DN6636_c0_g1_i2.p1	TRINITY_DN3882_c0_g1_i1.p1	TRINITY_DN17490_c0_g1_i1.p1	TRINITY_DN17337_c0_g1_i1.p1		TRINITY_DN12931_c0_g1_i1.p1	TRINITY_DN4423_c0_g1_i1.p1	TRINITY_DN29450_c1_g2_i1.p1	TRINITY_DN73788_c0_g1_i1.p1	TRINITY_DN74021_c0_g1_i1.p1	TRINITY_DN9377_c0_g2_i1.p1		TRINITY_DN8086_c2_g4_i1.p1	TRINITY_DN5694_c0_g1_i1.p1	TRINITY_DN4733_c1_g1_i1.p1	TRINITY_DN14061_c0_g1_i2.p1	TRINITY_DN1540_c0_g1_i3.p1	TRINITY_DN2363_c0_g1_i5.p1	TRINITY_DN8874_c0_g1_i1.p1	TRINITY_DN5642_c0_g1_i2.p1	TRINITY_DN5271_c0_g1_i2.p1	TRINITY_DN12359_c0_g1_i5.p1	TRINITY_DN16007_c0_g1_i1.p1	TRINITY_DN8830_c0_g1_i1.p1	TRINITY_DN1960_c0_g1_i6.p1	TRINITY_DN4980_c0_g1_i2.p1	TRINITY_DN1419_c0_g1_i1.p1	TRINITY_DN23561_c0_g2_i1.p1	TRINITY_DN30011_c1_g1_i1.p1	TRINITY_DN92118_c0_g2_i2.p1	TRINITY_DN4565_c0_g1_i1.p1
127661at6656	TRUE	38	95	FBpp0078415	TRINITY_DN11969_c0_g1_i1.p1	TRINITY_DN32129_c0_g1_i1.p2	TRINITY_DN49530_c0_g1_i1.p1	c100363_g1_i1.p2	SMAR004593-PA	TRINITY_DN23777_c0_g2_i1.p1	TRINITY_DN106029_c0_g1_i1.p1	TRINITY_DN4843_c0_g1_i1.p2	TRINITY_DN13118_c0_g1_i1.p1	TRINITY_DN5173_c0_g1_i1.p1	TRINITY_DN1344_c0_g1_i1.p1	TRINITY_DN17995_c0_g1_i1.p1	TRINITY_DN43992_c0_g1_i1.p1	TRINITY_DN6048_c0_g1_i1.p1	TRINITY_DN24253_c0_g1_i1.p1	TRINITY_DN29613_c0_g4_i1.p1	TRINITY_DN70605_c0_g1_i2.p1	TRINITY_DN80475_c1_g2_i4.p1			TRINITY_DN31367_c0_g1_i1.p1	TRINITY_DN38429_c0_g1_i3.p1	TRINITY_DN22213_c0_g1_i1.p1	TRINITY_DN3811_c0_g1_i1.p1	TRINITY_DN25051_c0_g1_i1.p1	TRINITY_DN53271_c0_g1_i1.p1	TRINITY_DN7024_c0_g1_i5.p1	TRINITY_DN6344_c0_g1_i2.p1	TRINITY_DN9938_c0_g1_i1.p1	TRINITY_DN19204_c0_g1_i1.p1	TRINITY_DN5195_c0_g1_i2.p2	TRINITY_DN4483_c0_g1_i1.p1	TRINITY_DN3453_c0_g1_i4.p1	TRINITY_DN16033_c0_g1_i1.p1	TRINITY_DN4409_c0_g1_i2.p1	TRINITY_DN18551_c0_g2_i1.p1	TRINITY_DN23610_c2_g2_i1.p1	TRINITY_DN24853_c0_g1_i1.p1	TRINITY_DN13331_c8_g2_i2.p1
129886at6656	TRUE	38	95	FBpp0082731	TRINITY_DN9037_c0_g1_i1.p1	TRINITY_DN19114_c0_g1_i1.p1	TRINITY_DN41156_c0_g1_i1.p1	c52725_g1_i1.p1	SMAR001590-PA	TRINITY_DN20506_c0_g1_i1.p1	TRINITY_DN28543_c0_g1_i1.p1	TRINITY_DN43494_c0_g1_i1.p1	TRINITY_DN20601_c0_g1_i1.p1	TRINITY_DN5984_c0_g1_i1.p1	TRINITY_DN24294_c0_g1_i1.p1	TRINITY_DN3562_c0_g1_i1.p1	TRINITY_DN19797_c0_g1_i1.p1	TRINITY_DN3038_c0_g2_i1.p1	TRINITY_DN29645_c0_g1_i1.p2	TRINITY_DN28911_c0_g1_i1.p1	TRINITY_DN65251_c2_g1_i1.p1	TRINITY_DN70845_c0_g1_i1.p1	TRINITY_DN40220_c0_g1_i1.p1		TRINITY_DN312_c0_g2_i2.p1	TRINITY_DN9855_c0_g1_i2.p1	TRINITY_DN19872_c0_g1_i1.p1	TRINITY_DN1600_c0_g1_i1.p1	TRINITY_DN60652_c0_g1_i1.p1	TRINITY_DN3873_c0_g1_i1.p1	TRINITY_DN3169_c0_g1_i1.p1	TRINITY_DN7090_c0_g1_i8.p1	TRINITY_DN6381_c0_g1_i3.p2	TRINITY_DN3641_c0_g1_i2.p1	TRINITY_DN14287_c0_g1_i1.p1	TRINITY_DN1175_c0_g1_i2.p1		TRINITY_DN29401_c0_g1_i1.p1	TRINITY_DN739_c0_g1_i2.p1	TRINITY_DN19918_c0_g2_i1.p1	TRINITY_DN24950_c0_g1_i1.p1	TRINITY_DN66814_c0_g1_i1.p1	TRINITY_DN14334_c0_g1_i1.p1
70078at6656	FALSE	39	97.5	FBpp0076451	TRINITY_DN53622_c0_g1_i1.p1	TRINITY_DN5442_c0_g1_i1.p1	TRINITY_DN50550_c0_g1_i1.p1	c68622_g1_i1.p1	SMAR010683-PA	TRINITY_DN27090_c1_g2_i1.p1	TRINITY_DN40932_c0_g6_i2.p1	TRINITY_DN858_c0_g1_i4.p1	TRINITY_DN6253_c0_g1_i1.p2	TRINITY_DN1457_c0_g1_i10.p1	TRINITY_DN173_c0_g1_i2.p1	TRINITY_DN7864_c0_g1_i7.p1	TRINITY_DN23512_c0_g1_i1.p1	TRINITY_DN10587_c0_g1_i1.p1	TRINITY_DN19328_c0_g1_i1.p1	TRINITY_DN24494_c1_g1_i1.p1	TRINITY_DN73610_c0_g1_i2.p1	TRINITY_DN85436_c1_g2_i2.p1	TRINITY_DN48130_c3_g5_i1.p1	TRINITY_DN54707_c1_g1_i1.p1	TRINITY_DN18277_c0_g1_i2.p1	TRINITY_DN15263_c0_g1_i1.p1	TRINITY_DN2774_c0_g1_i1.p2	TRINITY_DN959_c0_g1_i1.p1		TRINITY_DN14868_c0_g1_i1.p1	TRINITY_DN14351_c0_g1_i1.p1	TRINITY_DN9136_c0_g1_i12.p1	TRINITY_DN2184_c0_g1_i3.p1	TRINITY_DN89_c0_g1_i2.p1	TRINITY_DN1653_c0_g1_i2.p1	TRINITY_DN3599_c0_g1_i2.p1	TRINITY_DN2465_c0_g1_i3.p1	TRINITY_DN3544_c0_g1_i4.p1	TRINITY_DN206_c0_g1_i3.p2	TRINITY_DN13710_c0_g1_i1.p1	TRINITY_DN28474_c0_g4_i1.p1	TRINITY_DN91673_c1_g1_i1.p1	TRINITY_DN6766_c0_g3_i1.p1
130176at6656	TRUE	38	95	FBpp0072646	TRINITY_DN2828_c0_g1_i1.p1	TRINITY_DN19850_c0_g2_i1.p2	TRINITY_DN46855_c0_g1_i1.p2	c88046_g1_i1.p1	SMAR004776-PA	TRINITY_DN24685_c0_g1_i1.p1	TRINITY_DN306_c0_g1_i1.p1	TRINITY_DN1930_c0_g1_i1.p1	TRINITY_DN4847_c0_g1_i8.p1	TRINITY_DN2086_c0_g1_i1.p1	TRINITY_DN5637_c0_g1_i2.p1	TRINITY_DN11669_c0_g1_i4.p1	TRINITY_DN2487_c0_g1_i2.p1	TRINITY_DN1576_c0_g1_i1.p1	TRINITY_DN24665_c0_g1_i2.p1	TRINITY_DN30890_c1_g3_i2.p1	TRINITY_DN23832_c0_g1_i1.p1	TRINITY_DN128169_c0_g1_i1.p1			TRINITY_DN32840_c0_g1_i1.p1	TRINITY_DN635_c0_g1_i3.p1	TRINITY_DN735_c0_g1_i2.p1	TRINITY_DN3040_c0_g1_i2.p1	TRINITY_DN39333_c0_g1_i1.p1	TRINITY_DN30118_c0_g1_i1.p1	TRINITY_DN1348_c0_g1_i6.p2	TRINITY_DN4746_c0_g1_i1.p1	TRINITY_DN351_c1_g1_i24.p2	TRINITY_DN11144_c0_g1_i7.p1	TRINITY_DN5063_c0_g1_i1.p1	TRINITY_DN4047_c0_g1_i2.p1	TRINITY_DN564_c0_g1_i1.p1	TRINITY_DN4722_c0_g1_i2.p1	TRINITY_DN28243_c0_g1_i1.p1	TRINITY_DN24089_c0_g1_i1.p1	TRINITY_DN30347_c0_g2_i1.p1	TRINITY_DN42628_c0_g1_i1.p1	TRINITY_DN14476_c0_g1_i1.p1
130514at6656	TRUE	38	95	FBpp0080117	TRINITY_DN19086_c0_g2_i1.p1	TRINITY_DN34168_c1_g1_i1.p3	TRINITY_DN44452_c0_g1_i1.p1	c85647_g1_i1.p1	SMAR006159-PA	TRINITY_DN21861_c0_g4_i1.p1	TRINITY_DN37292_c0_g1_i1.p1	TRINITY_DN43901_c0_g1_i1.p1	TRINITY_DN5035_c0_g1_i1.p1	TRINITY_DN18052_c0_g1_i1.p1	TRINITY_DN8308_c0_g1_i2.p1	TRINITY_DN4015_c0_g3_i1.p1	TRINITY_DN5400_c0_g1_i1.p1	TRINITY_DN9622_c0_g1_i2.p1	TRINITY_DN72812_c0_g1_i1.p1	TRINITY_DN29999_c4_g7_i2.p1	TRINITY_DN74093_c0_g1_i1.p1			TRINITY_DN68086_c0_g1_i1.p1	TRINITY_DN13473_c0_g1_i1.p1	TRINITY_DN25085_c0_g1_i2.p1	TRINITY_DN3706_c2_g1_i1.p1	TRINITY_DN4701_c0_g1_i1.p1	TRINITY_DN39102_c0_g1_i1.p1	TRINITY_DN53161_c0_g1_i1.p1	TRINITY_DN463_c0_g1_i12.p2	TRINITY_DN2987_c0_g1_i3.p1	TRINITY_DN2976_c1_g1_i4.p1	TRINITY_DN4659_c0_g1_i2.p1	TRINITY_DN4687_c1_g1_i1.p2	TRINITY_DN606_c0_g1_i2.p1	TRINITY_DN1315_c0_g1_i1.p1	TRINITY_DN8045_c0_g1_i1.p1	TRINITY_DN3090_c0_g1_i1.p1	TRINITY_DN3385_c0_g1_i1.p1	TRINITY_DN21024_c0_g1_i1.p1	TRINITY_DN82127_c0_g1_i2.p1	TRINITY_DN13382_c11_g1_i1.p1
83765at6656	FALSE	38	95	FBpp0073059	TRINITY_DN3806_c0_g1_i1.p1	TRINITY_DN31469_c0_g1_i1.p1	TRINITY_DN51292_c0_g1_i1.p1	c92061_g5_i1.p1	SMAR004782-PA	TRINITY_DN19210_c0_g1_i1.p2	TRINITY_DN36535_c0_g1_i1.p1	TRINITY_DN38353_c0_g1_i1.p1	TRINITY_DN23101_c0_g1_i1.p1	TRINITY_DN25_c0_g1_i7.p1	TRINITY_DN5221_c1_g1_i1.p1	TRINITY_DN36190_c0_g1_i1.p1	TRINITY_DN28644_c0_g1_i1.p2	TRINITY_DN2105_c0_g1_i1.p1	TRINITY_DN39109_c0_g1_i1.p2	TRINITY_DN61051_c0_g1_i1.p1	TRINITY_DN73386_c0_g1_i3.p1	TRINITY_DN87623_c0_g1_i4.p1	TRINITY_DN44315_c0_g1_i1.p2		TRINITY_DN10298_c0_g1_i1.p1	TRINITY_DN857_c0_g1_i1.p1	TRINITY_DN1319_c0_g1_i1.p1	TRINITY_DN21880_c0_g2_i1.p1	TRINITY_DN3881_c0_g1_i1.p1	TRINITY_DN5047_c0_g1_i16.p1	TRINITY_DN4118_c0_g1_i1.p1	TRINITY_DN4470_c0_g1_i1.p1	TRINITY_DN8108_c0_g1_i6.p1	TRINITY_DN3495_c0_g1_i3.p1	TRINITY_DN1166_c0_g1_i10.p2	TRINITY_DN446_c0_g1_i2.p1	TRINITY_DN2918_c0_g1_i1.p1	TRINITY_DN8958_c0_g1_i1.p1	TRINITY_DN24814_c0_g1_i1.p1		TRINITY_DN2229_c0_g1_i1.p1	TRINITY_DN47415_c0_g1_i1.p1	TRINITY_DN8492_c2_g1_i1.p1
131642at6656	TRUE	38	95	FBpp0081860	TRINITY_DN45028_c0_g1_i1.p1	TRINITY_DN3632_c0_g1_i1.p1	TRINITY_DN46442_c0_g1_i1.p1	c73323_g1_i1.p1	SMAR009311-PA	TRINITY_DN2568_c0_g1_i1.p1	TRINITY_DN12557_c0_g1_i1.p1	TRINITY_DN38060_c0_g1_i1.p1	TRINITY_DN1555_c0_g2_i1.p1	TRINITY_DN22140_c0_g1_i1.p1	TRINITY_DN16977_c0_g1_i1.p1	TRINITY_DN1513_c0_g1_i1.p1	TRINITY_DN27536_c0_g1_i1.p2	TRINITY_DN2621_c0_g1_i2.p1	TRINITY_DN29861_c0_g1_i1.p1	TRINITY_DN23574_c0_g1_i2.p1	TRINITY_DN26343_c0_g1_i1.p1	TRINITY_DN81086_c0_g1_i1.p1			TRINITY_DN49424_c0_g1_i1.p1	TRINITY_DN33614_c0_g1_i1.p1	TRINITY_DN7312_c0_g1_i3.p1	TRINITY_DN9558_c0_g1_i1.p1	TRINITY_DN76712_c0_g1_i1.p1	TRINITY_DN19400_c0_g1_i1.p1	TRINITY_DN2706_c0_g1_i1.p1	TRINITY_DN3072_c0_g1_i1.p1	TRINITY_DN292_c0_g1_i11.p1	TRINITY_DN2243_c0_g1_i2.p1	TRINITY_DN3424_c0_g1_i6.p1	TRINITY_DN2352_c0_g1_i2.p1	TRINITY_DN3416_c0_g1_i1.p2	TRINITY_DN9904_c0_g1_i1.p1	TRINITY_DN11767_c0_g1_i1.p1	TRINITY_DN22072_c0_g1_i1.p1	TRINITY_DN9904_c0_g1_i1.p1	TRINITY_DN79319_c0_g1_i1.p1	TRINITY_DN2274_c0_g2_i1.p1
87575at6656	FALSE	39	97.5	FBpp0082877	TRINITY_DN15675_c0_g3_i1.p1	TRINITY_DN9282_c0_g1_i1.p1	TRINITY_DN51682_c0_g2_i1.p2	c24693_g1_i1.p1	SMAR007162-PA	TRINITY_DN24269_c0_g1_i1.p1	TRINITY_DN28327_c0_g1_i1.p1	TRINITY_DN7398_c0_g1_i1.p1	TRINITY_DN841_c0_g1_i15.p3	TRINITY_DN1821_c0_g1_i1.p1		TRINITY_DN22006_c0_g1_i2.p1	TRINITY_DN3697_c0_g2_i1.p1	TRINITY_DN3387_c0_g1_i1.p1	TRINITY_DN11058_c0_g1_i1.p1	TRINITY_DN33891_c0_g7_i7.p1	TRINITY_DN72180_c0_g1_i1.p1	TRINITY_DN78925_c0_g1_i2.p1	TRINITY_DN20459_c0_g1_i1.p1	TRINITY_DN81537_c0_g1_i1.p1	TRINITY_DN2840_c0_g3_i1.p1	TRINITY_DN1718_c0_g1_i1.p1	TRINITY_DN2985_c0_g1_i14.p2	TRINITY_DN23548_c0_g1_i1.p1	TRINITY_DN72196_c0_g1_i1.p1	TRINITY_DN20244_c0_g1_i1.p1	TRINITY_DN7211_c0_g1_i1.p1	TRINITY_DN2170_c0_g1_i4.p1	TRINITY_DN248_c2_g1_i10.p2	TRINITY_DN34073_c0_g1_i1.p1	TRINITY_DN1268_c0_g1_i3.p1	TRINITY_DN29695_c0_g1_i2.p1	TRINITY_DN3730_c0_g5_i1.p1	TRINITY_DN5647_c0_g1_i1.p1	TRINITY_DN19152_c0_g1_i1.p1	TRINITY_DN13722_c0_g1_i1.p1	TRINITY_DN30444_c0_g1_i1.p1	TRINITY_DN88908_c0_g1_i1.p1	TRINITY_DN1665_c0_g1_i1.p1
132329at6656	TRUE	38	95	FBpp0081185	TRINITY_DN40872_c0_g1_i1.p1	TRINITY_DN50652_c0_g1_i1.p1	TRINITY_DN52459_c4_g1_i1.p1	c62503_g1_i1.p1	SMAR004136-PA	TRINITY_DN18345_c0_g1_i1.p1	TRINITY_DN15411_c0_g2_i1.p1	TRINITY_DN219_c0_g1_i1.p1	TRINITY_DN6402_c0_g1_i2.p1	TRINITY_DN30526_c0_g1_i1.p1	TRINITY_DN17740_c0_g1_i1.p1	TRINITY_DN6197_c0_g1_i1.p1		TRINITY_DN91_c0_g1_i1.p1	TRINITY_DN19367_c0_g1_i1.p1	TRINITY_DN24840_c0_g1_i1.p1	TRINITY_DN60022_c0_g1_i1.p1	TRINITY_DN96035_c0_g1_i1.p1	TRINITY_DN20191_c0_g1_i1.p1	TRINITY_DN50575_c0_g2_i1.p1	TRINITY_DN1126_c0_g1_i1.p1	TRINITY_DN30700_c0_g1_i2.p1	TRINITY_DN266_c0_g3_i2.p1	TRINITY_DN2368_c0_g1_i1.p1		TRINITY_DN1660_c0_g2_i1.p1	TRINITY_DN2834_c0_g1_i1.p1	TRINITY_DN5441_c0_g1_i1.p1	TRINITY_DN5665_c0_g1_i1.p1	TRINITY_DN4414_c0_g1_i1.p1	TRINITY_DN2012_c0_g1_i1.p1	TRINITY_DN2557_c0_g1_i5.p1	TRINITY_DN15075_c0_g1_i1.p1	TRINITY_DN1150_c0_g1_i1.p1	TRINITY_DN243_c0_g1_i1.p1	TRINITY_DN14825_c0_g2_i1.p1	TRINITY_DN23097_c0_g1_i1.p2	TRINITY_DN86595_c0_g1_i2.p1	TRINITY_DN10435_c0_g1_i1.p1
90600at6656	FALSE	38	95	FBpp0099759	TRINITY_DN18687_c0_g3_i2.p1	TRINITY_DN33045_c2_g1_i1.p3	TRINITY_DN51958_c0_g1_i1.p1	c67653_g1_i1.p1	SMAR011994-PA	TRINITY_DN28662_c0_g1_i3.p1	TRINITY_DN17270_c0_g1_i1.p1	TRINITY_DN429_c0_g1_i1.p1	TRINITY_DN4442_c0_g1_i1.p1	TRINITY_DN16547_c0_g1_i1.p1	TRINITY_DN7810_c0_g1_i1.p1	TRINITY_DN8507_c0_g1_i1.p1		TRINITY_DN1781_c0_g1_i1.p1	TRINITY_DN29933_c0_g1_i2.p1	TRINITY_DN22478_c0_g2_i1.p1	TRINITY_DN48261_c0_g1_i1.p1	TRINITY_DN86046_c1_g3_i3.p1	TRINITY_DN45579_c0_g1_i1.p1		TRINITY_DN5475_c0_g3_i1.p1	TRINITY_DN34407_c0_g1_i1.p1	TRINITY_DN3030_c0_g1_i1.p1	TRINITY_DN3101_c0_g1_i2.p1	TRINITY_DN10192_c0_g1_i1.p1	TRINITY_DN2602_c0_g1_i8.p2	TRINITY_DN5249_c0_g1_i3.p1	TRINITY_DN8448_c0_g1_i1.p1	TRINITY_DN4348_c0_g1_i7.p1	TRINITY_DN1218_c2_g1_i2.p1	TRINITY_DN4046_c0_g1_i3.p2	TRINITY_DN1855_c0_g1_i11.p1	TRINITY_DN2621_c0_g1_i1.p2	TRINITY_DN1186_c0_g1_i11.p1	TRINITY_DN319_c0_g1_i2.p1	TRINITY_DN16959_c0_g1_i1.p1	TRINITY_DN28271_c1_g1_i2.p1	TRINITY_DN53129_c0_g1_i1.p1	TRINITY_DN13029_c1_g2_i1.p1
135859at6656	TRUE	38	95	FBpp0078009	TRINITY_DN8550_c0_g1_i1.p1	TRINITY_DN32678_c0_g1_i8.p2	TRINITY_DN43816_c0_g2_i1.p1	c9307_g1_i1.p1	SMAR000789-PA	TRINITY_DN16532_c0_g2_i1.p1	TRINITY_DN108204_c0_g1_i1.p1	TRINITY_DN3931_c0_g1_i3.p2	TRINITY_DN1594_c0_g1_i12.p2	TRINITY_DN4076_c0_g1_i2.p1	TRINITY_DN9149_c0_g1_i1.p1	TRINITY_DN4393_c1_g2_i2.p5	TRINITY_DN48596_c0_g1_i1.p1	TRINITY_DN3881_c0_g1_i3.p1	TRINITY_DN22282_c0_g2_i1.p1	TRINITY_DN14355_c0_g1_i1.p1	TRINITY_DN69417_c0_g1_i1.p1	TRINITY_DN78592_c0_g1_i1.p1			TRINITY_DN12096_c0_g1_i2.p1	TRINITY_DN34306_c0_g1_i3.p1	TRINITY_DN4097_c0_g1_i1.p1	TRINITY_DN1689_c0_g1_i30.p2	TRINITY_DN60515_c0_g1_i2.p1	TRINITY_DN52147_c0_g1_i1.p1	TRINITY_DN32508_c0_g1_i1.p1	TRINITY_DN10557_c0_g1_i1.p1	TRINITY_DN13002_c0_g1_i9.p1	TRINITY_DN2471_c0_g1_i3.p1	TRINITY_DN3122_c0_g1_i2.p1	TRINITY_DN4672_c0_g1_i4.p1	TRINITY_DN1700_c0_g1_i1.p3	TRINITY_DN2339_c0_g1_i2.p1	TRINITY_DN20337_c0_g1_i3.p1	TRINITY_DN36239_c0_g1_i1.p1	TRINITY_DN21372_c0_g1_i3.p1	TRINITY_DN9445_c0_g1_i1.p1	TRINITY_DN10585_c0_g1_i1.p1
141166at6656	TRUE	38	95	FBpp0087203	TRINITY_DN15840_c0_g1_i2.p1	TRINITY_DN29331_c0_g1_i1.p1	TRINITY_DN49206_c0_g1_i1.p1	c79037_g1_i2.p2	SMAR014036-PA	TRINITY_DN27469_c0_g4_i2.p1	TRINITY_DN28905_c0_g1_i1.p1	TRINITY_DN5070_c0_g1_i1.p1	TRINITY_DN26184_c0_g1_i1.p1	TRINITY_DN3298_c0_g2_i1.p1	TRINITY_DN340_c0_g1_i2.p1	TRINITY_DN2110_c0_g1_i4.p1	TRINITY_DN6521_c0_g1_i1.p1	TRINITY_DN402_c0_g1_i17.p1		TRINITY_DN33652_c2_g2_i6.p2	TRINITY_DN54412_c0_g2_i1.p1	TRINITY_DN63413_c0_g1_i1.p1	TRINITY_DN38634_c0_g1_i2.p1		TRINITY_DN1779_c0_g1_i1.p1	TRINITY_DN10028_c0_g2_i2.p1	TRINITY_DN1420_c0_g1_i5.p1	TRINITY_DN1838_c0_g1_i6.p1	TRINITY_DN17562_c0_g1_i2.p1	TRINITY_DN60893_c0_g1_i6.p1	TRINITY_DN490_c0_g2_i5.p2	TRINITY_DN1473_c0_g1_i3.p2	TRINITY_DN1895_c0_g1_i1.p1	TRINITY_DN942_c0_g1_i9.p1	TRINITY_DN12257_c0_g1_i1.p1	TRINITY_DN2297_c0_g1_i21.p1	TRINITY_DN5128_c0_g1_i1.p1	TRINITY_DN2239_c0_g1_i7.p1	TRINITY_DN294_c0_g1_i4.p1	TRINITY_DN26007_c0_g1_i1.p1	TRINITY_DN29065_c0_g1_i2.p1	TRINITY_DN51995_c0_g1_i1.p1	TRINITY_DN13349_c8_g1_i1.p1
93432at6656	FALSE	39	97.5	FBpp0084110	TRINITY_DN5132_c0_g1_i1.p1	TRINITY_DN20685_c0_g1_i1.p1	TRINITY_DN35584_c0_g1_i1.p1	c96972_g1_i2.p2	SMAR007212-PA	TRINITY_DN25008_c0_g5_i4.p1	TRINITY_DN32991_c0_g1_i1.p1	TRINITY_DN3776_c0_g1_i2.p1	TRINITY_DN3184_c0_g1_i83.p1	TRINITY_DN733_c0_g1_i6.p1	TRINITY_DN395_c0_g1_i1.p1	TRINITY_DN7477_c0_g1_i6.p1	TRINITY_DN8475_c0_g1_i1.p1	TRINITY_DN1451_c0_g1_i2.p1	TRINITY_DN76995_c0_g1_i1.p1	TRINITY_DN19032_c0_g1_i1.p1	TRINITY_DN51872_c0_g1_i1.p1	TRINITY_DN84789_c2_g1_i3.p1	TRINITY_DN14879_c0_g1_i1.p1		TRINITY_DN6186_c0_g1_i1.p1	TRINITY_DN17978_c0_g1_i1.p1	TRINITY_DN22121_c0_g1_i1.p1	TRINITY_DN3878_c0_g1_i5.p1	TRINITY_DN33875_c0_g1_i2.p1	TRINITY_DN4527_c0_g1_i1.p1	TRINITY_DN5257_c0_g1_i3.p1	TRINITY_DN18911_c0_g1_i9.p1	TRINITY_DN6832_c0_g1_i1.p1	TRINITY_DN2923_c0_g1_i2.p1	TRINITY_DN9446_c0_g1_i1.p1	TRINITY_DN881_c0_g1_i1.p1	TRINITY_DN3233_c0_g1_i3.p1	TRINITY_DN4194_c0_g1_i2.p1	TRINITY_DN14763_c0_g1_i1.p1	TRINITY_DN970_c0_g2_i1.p1	TRINITY_DN31702_c1_g5_i10.p1	TRINITY_DN66422_c1_g1_i1.p1	TRINITY_DN1938_c0_g1_i2.p1
141298at6656	TRUE	38	95	FBpp0112504	TRINITY_DN17017_c0_g2_i1.p2	TRINITY_DN33931_c0_g1_i1.p2	TRINITY_DN44763_c0_g1_i3.p2	c68074_g1_i1.p1	SMAR002686-PA	TRINITY_DN19251_c0_g1_i1.p1	TRINITY_DN31713_c0_g1_i1.p1	TRINITY_DN600_c0_g1_i6.p1	TRINITY_DN10224_c0_g1_i1.p1	TRINITY_DN1758_c0_g1_i5.p2	TRINITY_DN486_c0_g1_i1.p1	TRINITY_DN4038_c0_g1_i1.p1		TRINITY_DN860_c0_g1_i1.p1	TRINITY_DN20293_c0_g1_i1.p5	TRINITY_DN23017_c1_g1_i1.p2	TRINITY_DN72612_c0_g2_i4.p1	TRINITY_DN74900_c2_g1_i1.p1	TRINITY_DN46214_c0_g2_i1.p1		TRINITY_DN1503_c0_g1_i2.p1	TRINITY_DN419_c0_g1_i2.p1	TRINITY_DN2668_c0_g1_i13.p1	TRINITY_DN2208_c0_g1_i2.p1	TRINITY_DN83984_c0_g1_i1.p1	TRINITY_DN7350_c0_g1_i3.p1	TRINITY_DN3832_c0_g1_i1.p1	TRINITY_DN11289_c0_g1_i1.p1	TRINITY_DN5897_c0_g1_i14.p2	TRINITY_DN5796_c0_g1_i2.p1	TRINITY_DN186_c0_g3_i3.p1	TRINITY_DN1656_c0_g1_i1.p1	TRINITY_DN1201_c0_g1_i13.p5	TRINITY_DN382_c0_g1_i12.p1	TRINITY_DN4134_c0_g1_i1.p2	TRINITY_DN25767_c0_g1_i1.p1	TRINITY_DN31310_c0_g1_i6.p1	TRINITY_DN89647_c4_g10_i1.p1	TRINITY_DN4581_c0_g1_i1.p1
145102at6656	TRUE	38	95	FBpp0085724	TRINITY_DN9828_c0_g3_i1.p1	TRINITY_DN64108_c0_g1_i1.p1	TRINITY_DN49497_c0_g1_i1.p1	c77376_g1_i1.p1	SMAR013483-PA	TRINITY_DN12531_c0_g1_i1.p1	TRINITY_DN40468_c2_g1_i1.p1	TRINITY_DN2394_c1_g1_i1.p1	TRINITY_DN2139_c0_g1_i1.p1	TRINITY_DN514_c0_g1_i1.p1	TRINITY_DN2411_c0_g1_i1.p1	TRINITY_DN4310_c1_g1_i3.p1	TRINITY_DN6413_c0_g1_i1.p1	TRINITY_DN97_c0_g1_i1.p1	TRINITY_DN29996_c0_g1_i1.p1	TRINITY_DN31621_c16_g3_i1.p1	TRINITY_DN71395_c0_g1_i1.p1	TRINITY_DN75450_c0_g2_i1.p1			TRINITY_DN5419_c7_g1_i1.p1	TRINITY_DN5556_c0_g1_i2.p1	TRINITY_DN1916_c0_g1_i1.p1	TRINITY_DN1187_c0_g1_i1.p1	TRINITY_DN1532_c0_g1_i1.p1	TRINITY_DN5466_c0_g1_i4.p1	TRINITY_DN442_c0_g1_i1.p2	TRINITY_DN2090_c0_g2_i1.p1	TRINITY_DN3066_c0_g1_i1.p1	TRINITY_DN4538_c0_g1_i3.p1	TRINITY_DN2571_c1_g1_i1.p1	TRINITY_DN2667_c0_g1_i7.p1	TRINITY_DN3370_c0_g1_i31.p1	TRINITY_DN973_c0_g1_i2.p1	TRINITY_DN719_c0_g1_i1.p1	TRINITY_DN10461_c0_g1_i1.p1	TRINITY_DN19635_c1_g1_i1.p1	TRINITY_DN61157_c0_g1_i1.p1	TRINITY_DN13400_c6_g1_i1.p1
147980at6656	TRUE	38	95	FBpp0083128	TRINITY_DN25322_c0_g1_i1.p1	TRINITY_DN29380_c0_g1_i1.p2	TRINITY_DN52982_c6_g6_i1.p1	c94055_g1_i1.p3	SMAR002895-PA	TRINITY_DN24599_c0_g4_i1.p1	TRINITY_DN111027_c0_g1_i1.p1	TRINITY_DN2755_c0_g1_i1.p1	TRINITY_DN4881_c0_g1_i6.p1	TRINITY_DN8464_c0_g1_i1.p1	TRINITY_DN1016_c0_g1_i10.p1	TRINITY_DN34124_c0_g1_i1.p1	TRINITY_DN11859_c0_g1_i1.p1	TRINITY_DN33197_c0_g1_i1.p1	TRINITY_DN23238_c0_g1_i1.p1	TRINITY_DN32425_c1_g5_i1.p1	TRINITY_DN71650_c0_g1_i1.p1	TRINITY_DN139292_c0_g1_i1.p1			TRINITY_DN5646_c0_g2_i1.p1	TRINITY_DN23947_c0_g1_i1.p1	TRINITY_DN1447_c0_g1_i1.p1	TRINITY_DN5226_c2_g1_i1.p1	TRINITY_DN21314_c0_g2_i1.p1	TRINITY_DN2212_c0_g1_i11.p1	TRINITY_DN3287_c0_g1_i1.p1	TRINITY_DN5166_c0_g1_i1.p1	TRINITY_DN3677_c0_g1_i4.p1	TRINITY_DN862_c0_g1_i1.p1	TRINITY_DN1306_c0_g1_i4.p1	TRINITY_DN705_c0_g1_i5.p2	TRINITY_DN3150_c0_g1_i1.p1	TRINITY_DN7175_c0_g1_i10.p1	TRINITY_DN5946_c0_g1_i1.p1	TRINITY_DN8186_c0_g2_i1.p1	TRINITY_DN25819_c0_g2_i1.p1	TRINITY_DN83538_c0_g1_i4.p1	TRINITY_DN3761_c0_g1_i1.p1
21191at6656	TRUE	38	95	FBpp0071217	TRINITY_DN12883_c0_g1_i1.p1	TRINITY_DN31848_c0_g1_i1.p1	TRINITY_DN51240_c0_g1_i8.p1	c100008_g1_i2.p1	SMAR006056-PA	TRINITY_DN19712_c2_g1_i1.p1	TRINITY_DN39082_c0_g2_i1.p1	TRINITY_DN5200_c0_g1_i2.p1	TRINITY_DN8427_c0_g1_i1.p1	TRINITY_DN33696_c0_g1_i1.p2	TRINITY_DN29848_c0_g1_i1.p1	TRINITY_DN11466_c0_g2_i1.p1		TRINITY_DN3042_c0_g1_i1.p1	TRINITY_DN49401_c0_g1_i1.p1	TRINITY_DN33016_c1_g3_i1.p1	TRINITY_DN2938_c0_g2_i1.p1	TRINITY_DN76390_c0_g1_i1.p2		TRINITY_DN70299_c0_g1_i1.p1	TRINITY_DN37411_c0_g1_i1.p1	TRINITY_DN39062_c0_g1_i1.p1	TRINITY_DN1414_c1_g1_i1.p1	TRINITY_DN42593_c0_g1_i1.p1	TRINITY_DN3199_c0_g1_i2.p1	TRINITY_DN1627_c0_g1_i2.p1	TRINITY_DN2516_c0_g2_i2.p1	TRINITY_DN2667_c1_g1_i7.p1	TRINITY_DN2920_c0_g1_i34.p1	TRINITY_DN18748_c0_g1_i2.p1	TRINITY_DN24169_c0_g1_i1.p1	TRINITY_DN2901_c0_g1_i2.p1	TRINITY_DN3017_c1_g6_i2.p1	TRINITY_DN35430_c0_g1_i1.p1	TRINITY_DN18693_c0_g1_i1.p1	TRINITY_DN25336_c0_g6_i1.p1	TRINITY_DN27881_c1_g2_i3.p1	TRINITY_DN85563_c0_g1_i1.p1	TRINITY_DN11877_c0_g2_i1.p1
22887at6656	TRUE	38	95	FBpp0306062	TRINITY_DN15021_c0_g1_i4.p1	TRINITY_DN29047_c0_g1_i1.p1	TRINITY_DN53080_c2_g2_i1.p1	c92902_g1_i1.p1	SMAR008160-PA	TRINITY_DN24475_c0_g1_i3.p1	TRINITY_DN49980_c0_g1_i1.p1	TRINITY_DN883_c0_g1_i1.p1	TRINITY_DN9746_c0_g1_i2.p1	TRINITY_DN23278_c0_g1_i1.p1	TRINITY_DN27839_c0_g1_i1.p1	TRINITY_DN28465_c0_g1_i2.p1		TRINITY_DN3555_c0_g1_i1.p1	TRINITY_DN22834_c0_g1_i1.p1	TRINITY_DN19594_c0_g1_i1.p1	TRINITY_DN17265_c0_g1_i1.p1	TRINITY_DN83959_c0_g1_i3.p1		TRINITY_DN10618_c0_g1_i1.p1	TRINITY_DN5206_c0_g1_i1.p1	TRINITY_DN1359_c0_g1_i2.p1	TRINITY_DN1270_c0_g2_i1.p1	TRINITY_DN4019_c0_g1_i1.p1	TRINITY_DN85589_c0_g1_i1.p1	TRINITY_DN6936_c0_g1_i1.p1	TRINITY_DN4385_c0_g1_i1.p1	TRINITY_DN2112_c0_g1_i5.p1	TRINITY_DN5381_c0_g1_i1.p1	TRINITY_DN8522_c0_g1_i1.p1	TRINITY_DN1550_c0_g1_i8.p1	TRINITY_DN3617_c0_g2_i2.p1	TRINITY_DN11653_c0_g1_i1.p1	TRINITY_DN43044_c0_g1_i1.p1	TRINITY_DN6396_c0_g2_i1.p1	TRINITY_DN8584_c0_g3_i1.p1	TRINITY_DN31728_c0_g1_i2.p1	TRINITY_DN83877_c0_g1_i1.p1	TRINITY_DN12374_c0_g1_i1.p1
40213at6656	TRUE	38	95	FBpp0078316	TRINITY_DN17938_c0_g2_i1.p1	TRINITY_DN31761_c0_g1_i2.p1	TRINITY_DN49208_c0_g2_i1.p1	c99678_g1_i1.p1	SMAR012937-PA	TRINITY_DN26519_c0_g4_i1.p1	TRINITY_DN133097_c0_g1_i1.p1	TRINITY_DN3983_c0_g1_i1.p1	TRINITY_DN20279_c0_g1_i1.p1	TRINITY_DN30738_c0_g1_i1.p1	TRINITY_DN12200_c0_g1_i1.p1	TRINITY_DN7955_c0_g1_i1.p1		TRINITY_DN2072_c0_g1_i2.p1	TRINITY_DN691_c0_g1_i1.p1	TRINITY_DN32170_c1_g3_i8.p1	TRINITY_DN73065_c0_g1_i3.p1	TRINITY_DN87105_c0_g3_i1.p1		TRINITY_DN11934_c0_g1_i1.p1	TRINITY_DN9323_c0_g3_i1.p1	TRINITY_DN30778_c0_g1_i1.p1	TRINITY_DN17695_c0_g1_i1.p1	TRINITY_DN3197_c0_g1_i1.p1	TRINITY_DN11635_c0_g1_i1.p1	TRINITY_DN4379_c0_g1_i3.p1	TRINITY_DN6771_c0_g1_i2.p1	TRINITY_DN6798_c0_g3_i6.p1	TRINITY_DN3332_c0_g1_i3.p1	TRINITY_DN8727_c0_g3_i1.p1	TRINITY_DN4286_c0_g1_i1.p1	TRINITY_DN4610_c0_g1_i6.p1	TRINITY_DN2406_c0_g1_i3.p1	TRINITY_DN8917_c0_g1_i2.p1	TRINITY_DN27323_c0_g1_i1.p1	TRINITY_DN27757_c0_g1_i1.p1	TRINITY_DN28871_c0_g3_i8.p1	TRINITY_DN88895_c1_g1_i1.p1	TRINITY_DN13748_c0_g1_i1.p1
42819at6656	TRUE	38	95	FBpp0072151	TRINITY_DN16950_c0_g1_i1.p1	TRINITY_DN28933_c0_g1_i1.p1	TRINITY_DN52607_c0_g1_i5.p1	c88954_g1_i1.p1	SMAR015352-PA	TRINITY_DN27733_c0_g2_i2.p1	TRINITY_DN124312_c0_g1_i1.p1	TRINITY_DN2255_c0_g1_i1.p1	TRINITY_DN128_c0_g1_i2.p1	TRINITY_DN25576_c0_g1_i1.p1	TRINITY_DN4210_c0_g1_i1.p1	TRINITY_DN2281_c0_g1_i3.p1		TRINITY_DN974_c0_g1_i1.p1	TRINITY_DN22500_c0_g1_i1.p1	TRINITY_DN31861_c0_g1_i3.p1	TRINITY_DN127470_c0_g1_i1.p1	TRINITY_DN81910_c0_g1_i5.p1		TRINITY_DN13110_c1_g1_i1.p1	TRINITY_DN3833_c0_g1_i1.p1	TRINITY_DN4265_c0_g1_i2.p1	TRINITY_DN2740_c0_g1_i1.p1	TRINITY_DN10770_c0_g1_i1.p1	TRINITY_DN1091_c0_g1_i2.p1	TRINITY_DN21381_c0_g1_i2.p1	TRINITY_DN6865_c0_g1_i3.p1	TRINITY_DN1899_c0_g1_i1.p1	TRINITY_DN7370_c0_g1_i1.p1	TRINITY_DN1181_c0_g1_i12.p1	TRINITY_DN1192_c0_g1_i1.p1	TRINITY_DN1901_c0_g1_i4.p1	TRINITY_DN321_c0_g1_i1.p1	TRINITY_DN2261_c0_g1_i3.p1	TRINITY_DN3929_c0_g1_i1.p1	TRINITY_DN25777_c0_g1_i1.p1	TRINITY_DN935_c0_g1_i1.p1	TRINITY_DN72433_c0_g2_i1.p1	TRINITY_DN11952_c0_g1_i1.p1
45732at6656	TRUE	38	95	FBpp0070409	TRINITY_DN16783_c0_g3_i1.p1	TRINITY_DN25246_c0_g1_i1.p1	TRINITY_DN46416_c0_g1_i1.p1	c76857_g1_i1.p1	SMAR004504-PA	TRINITY_DN13559_c0_g2_i1.p1	TRINITY_DN29908_c0_g1_i1.p1	TRINITY_DN3427_c0_g1_i3.p1	TRINITY_DN3319_c0_g1_i1.p1	TRINITY_DN5149_c0_g1_i2.p1	TRINITY_DN22348_c0_g1_i1.p1	TRINITY_DN3440_c0_g1_i5.p1	TRINITY_DN3387_c0_g1_i1.p1	TRINITY_DN10522_c0_g1_i1.p1	TRINITY_DN23935_c0_g1_i2.p1	TRINITY_DN29892_c0_g2_i1.p1	TRINITY_DN72976_c0_g1_i1.p1	TRINITY_DN63434_c0_g1_i1.p1		TRINITY_DN67287_c0_g1_i1.p1	TRINITY_DN1663_c0_g1_i1.p1	TRINITY_DN3573_c0_g1_i1.p1	TRINITY_DN14589_c0_g1_i1.p1	TRINITY_DN2461_c0_g1_i1.p1	TRINITY_DN84717_c0_g1_i1.p1	TRINITY_DN32975_c0_g1_i1.p1	TRINITY_DN902_c2_g1_i2.p1	TRINITY_DN1303_c0_g1_i1.p1	TRINITY_DN330_c3_g1_i9.p1		TRINITY_DN9770_c0_g1_i1.p1	TRINITY_DN13141_c0_g1_i3.p1	TRINITY_DN1113_c0_g1_i1.p1	TRINITY_DN8996_c0_g2_i2.p1	TRINITY_DN9630_c0_g1_i2.p1	TRINITY_DN43904_c0_g1_i1.p1	TRINITY_DN28069_c0_g3_i1.p1	TRINITY_DN73209_c0_g1_i1.p1	TRINITY_DN13719_c0_g1_i1.p1
102321at6656	FALSE	37	92.5	FBpp0070181	TRINITY_DN16451_c0_g1_i1.p1	TRINITY_DN23091_c0_g1_i1.p1	TRINITY_DN51163_c0_g1_i4.p1	c94413_g1_i2.p1	SMAR003572-PA	TRINITY_DN27817_c5_g2_i2.p1	TRINITY_DN78904_c0_g1_i1.p1	TRINITY_DN1663_c0_g1_i2.p1	TRINITY_DN5642_c0_g1_i1.p1	TRINITY_DN6231_c0_g1_i4.p1	TRINITY_DN5452_c0_g1_i2.p1	TRINITY_DN5112_c0_g1_i1.p1	TRINITY_DN2257_c0_g1_i2.p1	TRINITY_DN765_c1_g1_i2.p1		TRINITY_DN32890_c0_g3_i1.p1	TRINITY_DN69849_c0_g1_i1.p1	TRINITY_DN86186_c0_g3_i3.p1			TRINITY_DN6492_c0_g1_i2.p1	TRINITY_DN45387_c0_g1_i1.p1	TRINITY_DN1393_c0_g1_i1.p1	TRINITY_DN23650_c0_g1_i1.p1	TRINITY_DN8692_c0_g1_i2.p1	TRINITY_DN5574_c0_g1_i1.p2	TRINITY_DN3581_c0_g1_i7.p1	TRINITY_DN16121_c0_g1_i5.p1	TRINITY_DN3584_c0_g1_i1.p1	TRINITY_DN23060_c0_g1_i1.p1	TRINITY_DN2628_c0_g1_i1.p1	TRINITY_DN6904_c0_g1_i5.p1	TRINITY_DN5658_c0_g1_i3.p1	TRINITY_DN8866_c0_g1_i3.p1	TRINITY_DN4041_c0_g1_i2.p2	TRINITY_DN22536_c0_g1_i2.p1	TRINITY_DN27565_c0_g3_i1.p1	TRINITY_DN68511_c0_g1_i1.p1	TRINITY_DN11804_c0_g1_i2.p2
102714at6656	FALSE	38	95	FBpp0289202	TRINITY_DN25273_c0_g3_i1.p1	TRINITY_DN5438_c0_g1_i1.p1	TRINITY_DN44687_c0_g1_i3.p1	c99413_g1_i1.p1	SMAR012207-PA	TRINITY_DN346_c0_g2_i1.p1	TRINITY_DN39611_c0_g1_i1.p1	TRINITY_DN17657_c0_g1_i1.p1	TRINITY_DN2556_c0_g1_i5.p1	TRINITY_DN17860_c0_g1_i1.p1	TRINITY_DN33279_c0_g1_i1.p1	TRINITY_DN9935_c0_g1_i4.p1	TRINITY_DN3098_c0_g1_i2.p1	TRINITY_DN408_c0_g1_i28.p1	TRINITY_DN29567_c0_g1_i2.p1	TRINITY_DN19261_c0_g1_i2.p1	TRINITY_DN68298_c0_g1_i3.p1	TRINITY_DN63613_c0_g1_i1.p1	TRINITY_DN19718_c0_g1_i1.p1		TRINITY_DN9108_c0_g1_i2.p1	TRINITY_DN1207_c0_g1_i1.p1	TRINITY_DN12443_c0_g1_i2.p1	TRINITY_DN33868_c0_g1_i1.p1		TRINITY_DN50300_c0_g1_i1.p1	TRINITY_DN9125_c0_g1_i1.p1	TRINITY_DN2479_c0_g4_i1.p1	TRINITY_DN4081_c0_g3_i5.p1	TRINITY_DN19501_c0_g1_i1.p1	TRINITY_DN11591_c0_g1_i1.p1	TRINITY_DN14887_c0_g2_i1.p1	TRINITY_DN2739_c0_g1_i1.p1	TRINITY_DN36332_c0_g1_i1.p1	TRINITY_DN17762_c0_g1_i1.p1	TRINITY_DN18979_c0_g1_i1.p1	TRINITY_DN51032_c0_g1_i1.p1	TRINITY_DN47993_c0_g2_i1.p1	TRINITY_DN8064_c4_g1_i1.p1
50792at6656	TRUE	38	95	FBpp0081157	TRINITY_DN20761_c0_g1_i1.p1	TRINITY_DN50128_c0_g1_i2.p1	TRINITY_DN50780_c0_g1_i1.p1	c85955_g1_i1.p1	SMAR006139-PA	TRINITY_DN28217_c0_g3_i1.p1	TRINITY_DN39542_c1_g2_i1.p1	TRINITY_DN4304_c0_g1_i2.p1	TRINITY_DN6246_c0_g1_i1.p1	TRINITY_DN18721_c0_g1_i1.p1	TRINITY_DN16802_c0_g1_i1.p1	TRINITY_DN3644_c0_g1_i1.p1	TRINITY_DN9622_c0_g1_i1.p2	TRINITY_DN34286_c0_g1_i1.p1	TRINITY_DN32171_c0_g1_i5.p1	TRINITY_DN31847_c0_g2_i4.p1	TRINITY_DN68002_c0_g2_i1.p1	TRINITY_DN75250_c0_g2_i1.p1	TRINITY_DN53159_c0_g1_i1.p1	TRINITY_DN67537_c0_g1_i1.p1	TRINITY_DN10476_c0_g1_i2.p1		TRINITY_DN7661_c0_g1_i2.p1	TRINITY_DN5374_c0_g1_i3.p1		TRINITY_DN40664_c0_g1_i1.p1	TRINITY_DN4025_c0_g1_i2.p1	TRINITY_DN54978_c0_g1_i1.p1	TRINITY_DN2338_c0_g2_i2.p1	TRINITY_DN2218_c0_g1_i6.p1	TRINITY_DN27916_c0_g1_i1.p1	TRINITY_DN54850_c0_g1_i1.p1	TRINITY_DN2449_c0_g2_i1.p1	TRINITY_DN6173_c0_g1_i9.p1	TRINITY_DN13991_c0_g1_i1.p1	TRINITY_DN25552_c0_g1_i1.p1	TRINITY_DN31386_c0_g2_i6.p1	TRINITY_DN83240_c3_g1_i2.p1	TRINITY_DN2508_c0_g1_i1.p1
104595at6656	FALSE	38	95	FBpp0077022	TRINITY_DN12020_c0_g2_i1.p1	TRINITY_DN13750_c0_g1_i1.p1	TRINITY_DN46583_c0_g1_i1.p1	c80367_g1_i2.p1	SMAR008719-PA	TRINITY_DN22373_c0_g1_i2.p1	TRINITY_DN54866_c0_g1_i1.p1	TRINITY_DN38597_c0_g1_i2.p1	TRINITY_DN5242_c0_g1_i3.p1	TRINITY_DN21188_c0_g1_i1.p1	TRINITY_DN29921_c0_g1_i1.p1	TRINITY_DN11836_c0_g1_i1.p1	TRINITY_DN29830_c0_g1_i1.p1	TRINITY_DN9345_c0_g1_i1.p1	TRINITY_DN31175_c0_g2_i1.p1	TRINITY_DN33933_c3_g3_i1.p1	TRINITY_DN64974_c0_g1_i1.p1	TRINITY_DN76127_c0_g1_i1.p1			TRINITY_DN11984_c0_g2_i1.p1	TRINITY_DN10586_c0_g1_i1.p1	TRINITY_DN17672_c0_g1_i1.p1	TRINITY_DN17275_c0_g1_i1.p1	TRINITY_DN71976_c0_g1_i1.p1	TRINITY_DN32283_c0_g1_i1.p1	TRINITY_DN2738_c0_g2_i1.p1	TRINITY_DN10188_c0_g1_i4.p1	TRINITY_DN3372_c0_g1_i38.p1	TRINITY_DN2929_c0_g1_i1.p1	TRINITY_DN4626_c0_g1_i6.p1	TRINITY_DN8937_c0_g1_i1.p1	TRINITY_DN4355_c0_g1_i1.p1	TRINITY_DN41226_c0_g1_i1.p1	TRINITY_DN29515_c0_g1_i1.p1	TRINITY_DN22431_c0_g1_i1.p1	TRINITY_DN18438_c0_g2_i1.p1	TRINITY_DN80978_c0_g1_i1.p1	TRINITY_DN10467_c0_g2_i1.p1
51757at6656	TRUE	38	95	FBpp0079305	TRINITY_DN39539_c0_g1_i1.p1	TRINITY_DN25888_c0_g1_i2.p1	TRINITY_DN51068_c0_g1_i4.p1	c89709_g1_i1.p1	SMAR012432-PA	TRINITY_DN23481_c0_g2_i1.p1	TRINITY_DN34446_c0_g1_i1.p1	TRINITY_DN1278_c0_g1_i1.p1	TRINITY_DN23084_c0_g1_i1.p1	TRINITY_DN13210_c0_g1_i1.p1	TRINITY_DN10173_c0_g1_i1.p1	TRINITY_DN28246_c0_g1_i1.p1	TRINITY_DN14045_c0_g1_i1.p1	TRINITY_DN1070_c0_g1_i2.p1		TRINITY_DN26581_c0_g1_i3.p1	TRINITY_DN67522_c0_g1_i1.p1	TRINITY_DN62835_c0_g1_i1.p1	TRINITY_DN9326_c0_g3_i1.p1		TRINITY_DN7462_c1_g1_i2.p1	TRINITY_DN7595_c0_g2_i1.p1	TRINITY_DN22329_c0_g1_i1.p1	TRINITY_DN4028_c0_g1_i5.p1	TRINITY_DN84008_c0_g1_i1.p1	TRINITY_DN42277_c0_g1_i1.p1	TRINITY_DN13874_c0_g2_i1.p1	TRINITY_DN614_c0_g1_i5.p1	TRINITY_DN911_c0_g1_i2.p1	TRINITY_DN760_c0_g1_i1.p1	TRINITY_DN9160_c0_g1_i1.p1	TRINITY_DN8597_c1_g2_i1.p1	TRINITY_DN4499_c0_g3_i2.p1	TRINITY_DN15410_c0_g1_i2.p1	TRINITY_DN1176_c0_g1_i1.p1	TRINITY_DN25608_c0_g1_i2.p1	TRINITY_DN29720_c0_g1_i4.p1	TRINITY_DN90315_c0_g1_i1.p1	TRINITY_DN1999_c0_g1_i1.p1
55847at6656	TRUE	38	95	FBpp0079710	TRINITY_DN12393_c0_g1_i1.p1	TRINITY_DN34156_c0_g1_i2.p1	TRINITY_DN50235_c1_g3_i2.p1	c94405_g1_i2.p1	SMAR000831-PA	TRINITY_DN26459_c0_g3_i1.p1	TRINITY_DN36869_c0_g1_i1.p1	TRINITY_DN5295_c0_g1_i2.p1	TRINITY_DN960_c1_g1_i1.p1	TRINITY_DN7685_c0_g1_i1.p2	TRINITY_DN17697_c0_g1_i1.p1	TRINITY_DN8971_c0_g1_i1.p1	TRINITY_DN53660_c0_g1_i1.p1	TRINITY_DN5800_c0_g1_i1.p1	TRINITY_DN88194_c0_g1_i1.p1	TRINITY_DN32717_c0_g2_i1.p1	TRINITY_DN113992_c0_g2_i1.p1	TRINITY_DN61584_c0_g2_i1.p1			TRINITY_DN27703_c0_g2_i1.p1	TRINITY_DN31720_c0_g1_i1.p1	TRINITY_DN17706_c0_g1_i1.p1	TRINITY_DN29222_c0_g1_i1.p1	TRINITY_DN60245_c0_g1_i1.p1	TRINITY_DN21094_c0_g1_i1.p1	TRINITY_DN9689_c0_g1_i1.p1	TRINITY_DN2655_c0_g1_i1.p1	TRINITY_DN344_c0_g1_i10.p1	TRINITY_DN28522_c0_g1_i2.p1	TRINITY_DN19242_c0_g1_i1.p1	TRINITY_DN3465_c0_g1_i4.p1	TRINITY_DN27055_c0_g1_i1.p1	TRINITY_DN4951_c0_g2_i1.p1	TRINITY_DN18508_c0_g1_i1.p1	TRINITY_DN26148_c0_g1_i1.p1	TRINITY_DN29189_c0_g1_i1.p1	TRINITY_DN86634_c0_g1_i1.p1	TRINITY_DN8819_c0_g1_i1.p1
108693at6656	FALSE	36	90	FBpp0075989	TRINITY_DN53608_c0_g1_i1.p1	TRINITY_DN25202_c0_g1_i1.p1	TRINITY_DN47323_c2_g2_i1.p1	c73633_g1_i1.p1	SMAR006721-PA	TRINITY_DN20096_c0_g1_i1.p1	TRINITY_DN7840_c0_g1_i1.p1	TRINITY_DN31209_c0_g1_i1.p1	TRINITY_DN4193_c0_g1_i1.p1	TRINITY_DN2275_c0_g1_i5.p1	TRINITY_DN13207_c0_g1_i1.p1	TRINITY_DN40548_c0_g1_i1.p1		TRINITY_DN26145_c0_g1_i1.p1	TRINITY_DN37498_c0_g1_i1.p1	TRINITY_DN30485_c0_g2_i2.p1	TRINITY_DN68053_c0_g1_i1.p1	TRINITY_DN97336_c0_g1_i1.p1			TRINITY_DN1368_c0_g1_i1.p1		TRINITY_DN2367_c0_g1_i1.p1	TRINITY_DN1543_c0_g1_i2.p1	TRINITY_DN36648_c0_g1_i1.p1	TRINITY_DN60643_c0_g1_i1.p1	TRINITY_DN2704_c1_g2_i4.p1	TRINITY_DN9984_c0_g2_i2.p1	TRINITY_DN1687_c0_g1_i2.p1	TRINITY_DN3278_c0_g1_i2.p1	TRINITY_DN27788_c0_g1_i1.p1	TRINITY_DN9174_c1_g2_i5.p1	TRINITY_DN2014_c0_g1_i1.p1	TRINITY_DN5851_c0_g1_i1.p1	TRINITY_DN17868_c0_g1_i1.p1	TRINITY_DN22563_c0_g1_i5.p1	TRINITY_DN30116_c0_g1_i15.p1	TRINITY_DN103724_c0_g1_i1.p1	TRINITY_DN11264_c0_g2_i1.p1
108808at6656	FALSE	38	95	FBpp0084130	TRINITY_DN77727_c0_g1_i1.p1	TRINITY_DN5684_c0_g1_i1.p1	TRINITY_DN50292_c0_g2_i2.p1	c82039_g1_i2.p1	SMAR007199-PA	TRINITY_DN18432_c0_g1_i1.p1	TRINITY_DN28616_c0_g1_i1.p1	TRINITY_DN24879_c0_g1_i1.p1	TRINITY_DN12417_c0_g1_i2.p1	TRINITY_DN8551_c0_g1_i1.p1	TRINITY_DN19764_c0_g1_i1.p1	TRINITY_DN3154_c0_g1_i1.p1	TRINITY_DN2_c1_g2_i1.p1	TRINITY_DN8654_c0_g1_i1.p1	TRINITY_DN33800_c0_g1_i1.p1	TRINITY_DN18527_c0_g1_i2.p1	TRINITY_DN23561_c0_g1_i1.p1	TRINITY_DN52997_c0_g1_i1.p1			TRINITY_DN9056_c0_g1_i2.p1	TRINITY_DN2072_c0_g1_i1.p1	TRINITY_DN19982_c0_g1_i1.p1	TRINITY_DN4420_c0_g1_i9.p1	TRINITY_DN31147_c0_g1_i1.p1	TRINITY_DN5231_c0_g1_i1.p1	TRINITY_DN4948_c0_g1_i1.p1	TRINITY_DN8401_c0_g2_i1.p1	TRINITY_DN5410_c0_g1_i3.p1	TRINITY_DN31562_c0_g1_i1.p1	TRINITY_DN1219_c0_g1_i3.p1	TRINITY_DN3289_c0_g1_i6.p1	TRINITY_DN48_c2_g4_i4.p1	TRINITY_DN3642_c0_g1_i7.p1	TRINITY_DN1872_c0_g1_i1.p1	TRINITY_DN21742_c0_g2_i2.p1	TRINITY_DN7302_c0_g2_i1.p1	TRINITY_DN42563_c0_g2_i1.p1	TRINITY_DN13169_c17_g1_i1.p1
61153at6656	TRUE	38	95	FBpp0079642	TRINITY_DN15630_c2_g1_i1.p1	TRINITY_DN7835_c0_g1_i1.p2	TRINITY_DN44670_c0_g1_i1.p2	c98904_g1_i1.p1	SMAR015086-PA	TRINITY_DN18054_c0_g3_i1.p1	TRINITY_DN42820_c2_g1_i1.p1	TRINITY_DN3621_c0_g1_i1.p2	TRINITY_DN5739_c0_g1_i1.p1	TRINITY_DN29950_c0_g1_i1.p1	TRINITY_DN1073_c0_g1_i2.p1	TRINITY_DN372_c0_g1_i1.p1		TRINITY_DN17194_c0_g1_i1.p1	TRINITY_DN28098_c0_g1_i2.p1	TRINITY_DN24402_c0_g1_i1.p1	TRINITY_DN72356_c0_g1_i1.p1	TRINITY_DN109982_c0_g1_i1.p1		TRINITY_DN51510_c2_g1_i1.p1	TRINITY_DN866_c0_g1_i1.p1	TRINITY_DN4189_c0_g1_i1.p1	TRINITY_DN22050_c0_g1_i1.p1	TRINITY_DN7147_c1_g1_i1.p1	TRINITY_DN9309_c0_g1_i3.p1	TRINITY_DN4879_c0_g1_i1.p1	TRINITY_DN7208_c0_g1_i1.p1	TRINITY_DN385_c0_g1_i1.p1	TRINITY_DN1385_c0_g1_i28.p1	TRINITY_DN9476_c0_g1_i2.p1	TRINITY_DN2837_c0_g2_i1.p1	TRINITY_DN3737_c0_g1_i2.p1	TRINITY_DN1404_c0_g2_i1.p1	TRINITY_DN4133_c0_g1_i1.p1	TRINITY_DN3941_c0_g1_i1.p2	TRINITY_DN19839_c0_g2_i1.p1	TRINITY_DN24444_c0_g1_i1.p1	TRINITY_DN89407_c22_g2_i3.p1	TRINITY_DN16062_c0_g1_i1.p1
63228at6656	TRUE	38	95	FBpp0086667	TRINITY_DN10963_c0_g1_i1.p1	TRINITY_DN29840_c0_g1_i1.p1	TRINITY_DN50542_c0_g1_i1.p1	c84487_g1_i1.p1	SMAR001699-PA	TRINITY_DN23625_c0_g3_i1.p1	TRINITY_DN95858_c0_g1_i1.p1	TRINITY_DN4292_c0_g1_i2.p1	TRINITY_DN1530_c0_g1_i1.p2	TRINITY_DN7329_c0_g1_i1.p2	TRINITY_DN32392_c0_g1_i1.p1	TRINITY_DN3028_c1_g1_i1.p1	TRINITY_DN22129_c0_g1_i1.p1	TRINITY_DN3428_c0_g2_i1.p1	TRINITY_DN93239_c0_g1_i1.p1	TRINITY_DN31390_c7_g9_i1.p1	TRINITY_DN70857_c0_g1_i1.p1	TRINITY_DN75257_c0_g1_i1.p1			TRINITY_DN1435_c1_g2_i1.p1	TRINITY_DN46757_c0_g1_i1.p1	TRINITY_DN9415_c0_g1_i1.p1	TRINITY_DN3031_c0_g1_i1.p1	TRINITY_DN61880_c0_g1_i2.p1	TRINITY_DN1890_c0_g1_i10.p1	TRINITY_DN7823_c0_g1_i1.p1	TRINITY_DN10119_c0_g1_i2.p1	TRINITY_DN6087_c0_g1_i30.p1	TRINITY_DN850_c0_g1_i2.p1	TRINITY_DN7655_c0_g1_i1.p1	TRINITY_DN5389_c0_g1_i14.p1	TRINITY_DN4921_c0_g2_i2.p1	TRINITY_DN5675_c2_g2_i8.p1	TRINITY_DN1143_c0_g1_i1.p2	TRINITY_DN14732_c0_g3_i1.p1	TRINITY_DN23701_c0_g1_i1.p1	TRINITY_DN83548_c0_g2_i1.p1	TRINITY_DN2756_c1_g1_i1.p1
112556at6656	FALSE	38	95	FBpp0074537	TRINITY_DN5068_c0_g1_i1.p1	TRINITY_DN31368_c0_g1_i3.p1	TRINITY_DN47330_c0_g1_i2.p1	c82539_g1_i1.p1	SMAR013285-PA	TRINITY_DN23674_c0_g2_i1.p1	TRINITY_DN47064_c0_g1_i1.p1	TRINITY_DN25196_c0_g1_i2.p1	TRINITY_DN2300_c0_g1_i1.p1	TRINITY_DN1532_c0_g1_i5.p1	TRINITY_DN32650_c0_g1_i1.p1	TRINITY_DN10135_c0_g1_i1.p1	TRINITY_DN1732_c0_g1_i1.p1	TRINITY_DN1197_c0_g1_i7.p1	TRINITY_DN231_c0_g1_i1.p1	TRINITY_DN32315_c2_g5_i6.p1		TRINITY_DN87943_c1_g1_i2.p1	TRINITY_DN10435_c0_g1_i1.p1		TRINITY_DN1183_c0_g1_i2.p1	TRINITY_DN5740_c0_g1_i1.p1	TRINITY_DN2159_c0_g1_i1.p1	TRINITY_DN8511_c0_g1_i1.p1	TRINITY_DN1184_c0_g1_i4.p1	TRINITY_DN3552_c0_g1_i1.p1	TRINITY_DN15442_c0_g1_i5.p1	TRINITY_DN8515_c0_g1_i21.p1	TRINITY_DN1986_c0_g1_i8.p1	TRINITY_DN6899_c0_g1_i2.p1	TRINITY_DN2939_c0_g1_i3.p1	TRINITY_DN8546_c0_g1_i5.p1	TRINITY_DN872_c0_g1_i2.p1	TRINITY_DN29430_c0_g1_i1.p1	TRINITY_DN17921_c0_g1_i1.p1	TRINITY_DN24227_c0_g1_i1.p1	TRINITY_DN30103_c1_g2_i1.p1	TRINITY_DN81151_c0_g1_i1.p1	TRINITY_DN5560_c0_g1_i1.p1
113960at6656	FALSE	38	95	FBpp0076818	TRINITY_DN45606_c0_g1_i1.p1	TRINITY_DN30574_c0_g2_i3.p1	TRINITY_DN52279_c0_g1_i1.p2	c100986_g2_i9.p2	SMAR011440-PA	TRINITY_DN24368_c0_g2_i3.p1	TRINITY_DN22778_c0_g1_i1.p1	TRINITY_DN8617_c0_g1_i3.p1	TRINITY_DN11501_c0_g1_i1.p1	TRINITY_DN2689_c0_g1_i2.p2	TRINITY_DN2944_c0_g1_i3.p1	TRINITY_DN856_c0_g1_i6.p1	TRINITY_DN9435_c0_g1_i1.p1	TRINITY_DN4027_c1_g1_i1.p1	TRINITY_DN29299_c0_g1_i3.p1	TRINITY_DN11508_c0_g1_i1.p1	TRINITY_DN73351_c0_g2_i1.p1	TRINITY_DN85094_c0_g1_i4.p1	TRINITY_DN23621_c0_g2_i1.p1		TRINITY_DN4120_c0_g1_i1.p1		TRINITY_DN14730_c0_g1_i2.p2	TRINITY_DN4943_c0_g1_i4.p1	TRINITY_DN36547_c0_g1_i1.p1	TRINITY_DN65035_c0_g1_i2.p1	TRINITY_DN4146_c0_g1_i14.p1	TRINITY_DN8488_c0_g2_i3.p1	TRINITY_DN743_c0_g1_i1.p1	TRINITY_DN29990_c0_g1_i1.p1	TRINITY_DN14366_c0_g1_i1.p1	TRINITY_DN5544_c0_g1_i1.p1	TRINITY_DN4796_c1_g1_i2.p2	TRINITY_DN15049_c0_g1_i2.p1	TRINITY_DN3164_c0_g1_i1.p1	TRINITY_DN8050_c0_g1_i1.p1	TRINITY_DN27197_c0_g1_i1.p1	TRINITY_DN32898_c0_g1_i1.p1	TRINITY_DN9516_c0_g1_i1.p1
65949at6656	TRUE	38	95	FBpp0075302	TRINITY_DN77188_c0_g1_i1.p1	TRINITY_DN14962_c0_g1_i1.p1	TRINITY_DN51596_c0_g1_i1.p1	c85517_g1_i1.p1	SMAR015642-PA	TRINITY_DN28103_c1_g6_i2.p1	TRINITY_DN35676_c0_g1_i1.p1	TRINITY_DN43648_c0_g1_i1.p1	TRINITY_DN8127_c0_g1_i1.p1	TRINITY_DN22001_c0_g1_i1.p1	TRINITY_DN9000_c0_g1_i1.p1	TRINITY_DN40396_c0_g1_i1.p1	TRINITY_DN22047_c0_g1_i1.p2	TRINITY_DN3431_c0_g1_i2.p1		TRINITY_DN22404_c0_g2_i1.p1	TRINITY_DN63972_c0_g2_i1.p1	TRINITY_DN85265_c1_g2_i2.p1	TRINITY_DN17323_c0_g1_i1.p1		TRINITY_DN5685_c0_g1_i1.p1	TRINITY_DN498_c0_g1_i2.p1	TRINITY_DN19680_c0_g1_i1.p1	TRINITY_DN28130_c0_g1_i1.p1	TRINITY_DN21382_c0_g1_i1.p1	TRINITY_DN33815_c0_g1_i1.p1	TRINITY_DN5234_c2_g1_i1.p1	TRINITY_DN3855_c0_g1_i1.p1	TRINITY_DN1303_c0_g2_i21.p1	TRINITY_DN5292_c0_g1_i1.p1	TRINITY_DN33547_c0_g1_i3.p1	TRINITY_DN13144_c0_g1_i11.p1	TRINITY_DN6235_c0_g1_i1.p1	TRINITY_DN6977_c0_g1_i1.p1	TRINITY_DN9335_c0_g2_i1.p1	TRINITY_DN20100_c0_g2_i2.p1	TRINITY_DN26378_c0_g1_i3.p1	TRINITY_DN85996_c0_g1_i1.p1	TRINITY_DN12643_c2_g1_i1.p1
67191at6656	TRUE	38	95	FBpp0072117	TRINITY_DN18574_c0_g2_i1.p1	TRINITY_DN29013_c0_g1_i1.p1	TRINITY_DN24786_c0_g1_i1.p1	c100339_g1_i3.p2	SMAR006547-PA	TRINITY_DN25974_c0_g2_i1.p1	TRINITY_DN29794_c0_g1_i1.p1	TRINITY_DN20241_c0_g1_i1.p1	TRINITY_DN15767_c0_g1_i1.p1	TRINITY_DN3476_c0_g1_i2.p1	TRINITY_DN22829_c0_g1_i1.p1	TRINITY_DN5626_c0_g1_i4.p1	TRINITY_DN29322_c0_g1_i1.p1	TRINITY_DN1522_c2_g1_i2.p1	TRINITY_DN23022_c0_g1_i1.p1	TRINITY_DN31698_c0_g3_i2.p1	TRINITY_DN41103_c0_g2_i1.p1	TRINITY_DN82576_c0_g1_i2.p1			TRINITY_DN32762_c0_g1_i1.p1	TRINITY_DN10210_c0_g1_i2.p1	TRINITY_DN2839_c0_g1_i1.p1	TRINITY_DN3529_c0_g1_i1.p1	TRINITY_DN88117_c0_g1_i1.p1	TRINITY_DN1856_c0_g3_i4.p1	TRINITY_DN11411_c0_g1_i3.p1	TRINITY_DN9261_c0_g1_i3.p1	TRINITY_DN3086_c0_g1_i2.p1	TRINITY_DN3772_c1_g1_i4.p1	TRINITY_DN274_c0_g2_i3.p1	TRINITY_DN3978_c0_g1_i1.p1	TRINITY_DN1078_c0_g1_i18.p1	TRINITY_DN3704_c0_g2_i4.p1	TRINITY_DN18814_c0_g1_i2.p1	TRINITY_DN11473_c0_g2_i1.p1	TRINITY_DN25202_c0_g4_i1.p1	TRINITY_DN85223_c2_g1_i1.p1	TRINITY_DN8234_c3_g1_i1.p1
117811at6656	FALSE	37	92.5	FBpp0079262	TRINITY_DN11189_c0_g1_i2.p1		TRINITY_DN43232_c0_g1_i1.p1	c89067_g1_i2.p2	SMAR008906-PA	TRINITY_DN11483_c0_g2_i1.p1	TRINITY_DN15720_c0_g1_i1.p1	TRINITY_DN1485_c0_g1_i3.p1	TRINITY_DN2600_c0_g1_i18.p4	TRINITY_DN6122_c0_g1_i1.p1	TRINITY_DN34024_c0_g1_i1.p1	TRINITY_DN43445_c0_g1_i1.p1	TRINITY_DN43321_c0_g1_i1.p1	TRINITY_DN2556_c0_g1_i3.p1	TRINITY_DN22991_c0_g2_i1.p1	TRINITY_DN33056_c3_g3_i1.p2	TRINITY_DN50526_c0_g1_i1.p1	TRINITY_DN70846_c0_g1_i1.p1	TRINITY_DN7967_c0_g2_i1.p1		TRINITY_DN1035_c0_g1_i1.p1	TRINITY_DN35156_c0_g1_i1.p1	TRINITY_DN703_c0_g1_i4.p2	TRINITY_DN13678_c0_g1_i1.p1	TRINITY_DN3860_c0_g1_i2.p1	TRINITY_DN12158_c0_g1_i1.p1	TRINITY_DN9475_c0_g1_i2.p1	TRINITY_DN7350_c0_g2_i1.p2	TRINITY_DN23299_c0_g1_i1.p1	TRINITY_DN4458_c0_g1_i2.p1	TRINITY_DN2748_c0_g1_i2.p2	TRINITY_DN2050_c0_g1_i1.p2	TRINITY_DN27480_c0_g1_i1.p1	TRINITY_DN31_c1_g1_i1.p1	TRINITY_DN27838_c0_g1_i1.p1		TRINITY_DN24161_c0_g1_i2.p1	TRINITY_DN83381_c0_g1_i1.p1	TRINITY_DN13557_c0_g1_i1.p1
6820at6656	TRUE	38	95	FBpp0072494	TRINITY_DN11960_c0_g1_i1.p1	TRINITY_DN30969_c1_g1_i1.p1	TRINITY_DN52854_c0_g1_i1.p1	c98721_g1_i1.p1	SMAR008751-PA	TRINITY_DN27097_c0_g2_i2.p1	TRINITY_DN43040_c2_g1_i3.p1	TRINITY_DN13523_c0_g1_i6.p1	TRINITY_DN4216_c0_g1_i12.p1	TRINITY_DN9732_c0_g1_i1.p1	TRINITY_DN11453_c0_g1_i1.p1	TRINITY_DN34616_c0_g1_i1.p1		TRINITY_DN252_c1_g1_i2.p1	TRINITY_DN31369_c3_g5_i2.p1	TRINITY_DN33025_c0_g1_i10.p1	TRINITY_DN126894_c0_g1_i1.p1	TRINITY_DN75758_c0_g2_i1.p1		TRINITY_DN9699_c0_g1_i1.p1	TRINITY_DN735_c1_g2_i2.p1	TRINITY_DN10724_c0_g1_i2.p1	TRINITY_DN7320_c0_g2_i1.p1	TRINITY_DN34002_c0_g1_i2.p1	TRINITY_DN36981_c0_g1_i1.p1	TRINITY_DN13288_c0_g3_i1.p1	TRINITY_DN9519_c1_g1_i5.p1	TRINITY_DN6418_c0_g1_i5.p1	TRINITY_DN2146_c0_g1_i12.p1	TRINITY_DN23815_c0_g1_i1.p1	TRINITY_DN8971_c0_g1_i2.p1	TRINITY_DN1498_c0_g1_i4.p1	TRINITY_DN14895_c0_g1_i1.p1	TRINITY_DN6980_c0_g1_i4.p1	TRINITY_DN23358_c0_g1_i1.p1	TRINITY_DN25877_c0_g1_i1.p1	TRINITY_DN31275_c0_g3_i2.p1	TRINITY_DN91461_c0_g1_i1.p1	TRINITY_DN13224_c9_g2_i1.p1
77883at6656	TRUE	38	95	FBpp0071046	TRINITY_DN19289_c1_g1_i1.p1	TRINITY_DN20920_c0_g1_i1.p1	TRINITY_DN50045_c0_g1_i1.p2	c80512_g1_i2.p1	SMAR013618-PA	TRINITY_DN20905_c0_g2_i1.p2	TRINITY_DN42132_c0_g1_i1.p1	TRINITY_DN706_c0_g1_i5.p1	TRINITY_DN7716_c0_g1_i2.p1	TRINITY_DN7602_c0_g1_i2.p1	TRINITY_DN7970_c0_g1_i1.p1	TRINITY_DN17307_c0_g1_i1.p1	TRINITY_DN22321_c0_g1_i1.p1	TRINITY_DN30991_c0_g1_i1.p1	TRINITY_DN43745_c0_g1_i1.p1	TRINITY_DN32199_c0_g1_i1.p1	TRINITY_DN73678_c0_g1_i1.p1		TRINITY_DN79334_c0_g1_i1.p1		TRINITY_DN3553_c0_g1_i1.p1	TRINITY_DN1353_c0_g1_i18.p1	TRINITY_DN2331_c0_g1_i1.p1	TRINITY_DN3045_c0_g1_i1.p1	TRINITY_DN78539_c0_g1_i1.p1	TRINITY_DN6249_c0_g1_i3.p1	TRINITY_DN412_c0_g1_i3.p1	TRINITY_DN2718_c0_g1_i1.p1	TRINITY_DN33974_c0_g1_i1.p1	TRINITY_DN14463_c0_g1_i1.p1	TRINITY_DN23899_c0_g1_i1.p1	TRINITY_DN6854_c0_g1_i1.p1	TRINITY_DN900_c0_g1_i1.p1	TRINITY_DN30777_c0_g1_i1.p1	TRINITY_DN14352_c0_g1_i1.p1	TRINITY_DN1741_c0_g2_i1.p1	TRINITY_DN41517_c0_g1_i1.p1	TRINITY_DN79997_c2_g1_i1.p1	TRINITY_DN15675_c0_g1_i1.p1
89864at6656	TRUE	38	95	FBpp0072720	TRINITY_DN15736_c0_g2_i1.p1	TRINITY_DN38267_c0_g1_i1.p1	TRINITY_DN53265_c2_g1_i1.p2	c93542_g1_i1.p1	SMAR009475-PA	TRINITY_DN26649_c0_g2_i1.p1	TRINITY_DN33118_c1_g1_i1.p1	TRINITY_DN747_c0_g1_i4.p1	TRINITY_DN638_c0_g1_i7.p1	TRINITY_DN6388_c0_g1_i2.p1	TRINITY_DN3602_c0_g1_i1.p1	TRINITY_DN2854_c0_g1_i3.p1	TRINITY_DN1616_c0_g1_i5.p1	TRINITY_DN21912_c0_g1_i1.p1		TRINITY_DN27435_c0_g2_i1.p1	TRINITY_DN67327_c0_g1_i2.p1	TRINITY_DN83329_c1_g3_i1.p2	TRINITY_DN73233_c0_g1_i1.p2		TRINITY_DN8333_c0_g1_i1.p1	TRINITY_DN4177_c3_g1_i8.p1	TRINITY_DN6475_c0_g1_i3.p1	TRINITY_DN35363_c0_g1_i1.p1	TRINITY_DN14058_c0_g1_i4.p1	TRINITY_DN2529_c0_g1_i1.p1	TRINITY_DN4788_c0_g1_i1.p1	TRINITY_DN5428_c0_g1_i1.p1	TRINITY_DN2690_c0_g1_i30.p1	TRINITY_DN4796_c0_g1_i4.p1	TRINITY_DN18369_c0_g1_i2.p1	TRINITY_DN6650_c0_g1_i3.p1	TRINITY_DN2457_c1_g1_i1.p1	TRINITY_DN3273_c0_g1_i10.p1	TRINITY_DN13747_c0_g1_i1.p1	TRINITY_DN25814_c5_g6_i1.p1	TRINITY_DN27599_c1_g1_i1.p1	TRINITY_DN92048_c9_g3_i1.p1	TRINITY_DN13343_c3_g1_i1.p1
92420at6656	TRUE	38	95	FBpp0083319	TRINITY_DN18319_c0_g2_i1.p1	TRINITY_DN22260_c0_g1_i1.p1	TRINITY_DN49624_c0_g1_i1.p1	c85627_g2_i1.p1	SMAR003309-PA	TRINITY_DN25487_c0_g3_i3.p1	TRINITY_DN42197_c0_g1_i9.p1	TRINITY_DN2753_c0_g1_i11.p1	TRINITY_DN6773_c0_g1_i1.p1	TRINITY_DN6090_c0_g1_i1.p1	TRINITY_DN703_c0_g1_i1.p1	TRINITY_DN1152_c0_g1_i1.p1	TRINITY_DN3498_c0_g1_i1.p1	TRINITY_DN7020_c0_g1_i1.p1	TRINITY_DN21882_c0_g1_i1.p1	TRINITY_DN32429_c2_g1_i14.p2	TRINITY_DN52256_c0_g2_i1.p1	TRINITY_DN82874_c0_g1_i1.p1			TRINITY_DN9875_c0_g1_i2.p1	TRINITY_DN1325_c0_g1_i1.p1	TRINITY_DN1576_c0_g1_i1.p1	TRINITY_DN392_c0_g1_i1.p1	TRINITY_DN1169_c0_g1_i3.p1	TRINITY_DN1092_c0_g1_i2.p1	TRINITY_DN12609_c0_g1_i8.p1	TRINITY_DN2126_c0_g1_i1.p1	TRINITY_DN5357_c0_g1_i4.p1	TRINITY_DN83_c0_g1_i2.p1	TRINITY_DN3829_c0_g1_i1.p1	TRINITY_DN2935_c0_g1_i2.p1	TRINITY_DN1854_c0_g1_i1.p1	TRINITY_DN1088_c0_g1_i2.p1	TRINITY_DN3593_c0_g3_i1.p1	TRINITY_DN11593_c0_g1_i1.p1	TRINITY_DN24895_c0_g1_i1.p1	TRINITY_DN81974_c0_g1_i1.p1	TRINITY_DN13201_c13_g1_i1.p1
122816at6656	FALSE	39	97.5	FBpp0074330	TRINITY_DN13308_c0_g1_i1.p1	TRINITY_DN23587_c0_g1_i1.p1	TRINITY_DN61320_c0_g1_i1.p1	c84273_g1_i3.p1	SMAR006832-PA	TRINITY_DN24533_c0_g1_i1.p1	TRINITY_DN14340_c0_g1_i1.p1	TRINITY_DN396_c0_g1_i1.p1	TRINITY_DN723_c0_g1_i17.p1	TRINITY_DN2593_c0_g1_i1.p1	TRINITY_DN12892_c0_g1_i2.p1	TRINITY_DN5910_c0_g4_i2.p1	TRINITY_DN3739_c1_g1_i2.p1	TRINITY_DN5028_c0_g1_i1.p1	TRINITY_DN43184_c0_g1_i1.p1	TRINITY_DN72782_c0_g1_i1.p1	TRINITY_DN64152_c0_g1_i1.p1	TRINITY_DN84549_c1_g1_i2.p1	TRINITY_DN27573_c0_g1_i1.p1		TRINITY_DN4160_c0_g1_i1.p1	TRINITY_DN24191_c0_g1_i1.p1	TRINITY_DN17527_c0_g1_i1.p1	TRINITY_DN8001_c1_g1_i5.p1	TRINITY_DN954_c0_g3_i1.p1	TRINITY_DN3446_c0_g1_i17.p1	TRINITY_DN26813_c0_g1_i1.p1	TRINITY_DN14260_c0_g3_i1.p1	TRINITY_DN1878_c0_g1_i2.p1	TRINITY_DN28896_c0_g1_i1.p1	TRINITY_DN1011_c0_g1_i2.p1	TRINITY_DN6295_c0_g1_i1.p1	TRINITY_DN255_c0_g1_i15.p2	TRINITY_DN8651_c0_g1_i3.p1	TRINITY_DN13653_c0_g1_i1.p1	TRINITY_DN16502_c0_g1_i1.p1	TRINITY_DN30095_c0_g1_i1.p1	TRINITY_DN73164_c0_g1_i4.p1	TRINITY_DN1690_c0_g1_i1.p1
93061at6656	TRUE	38	95	FBpp0084874	TRINITY_DN17847_c0_g5_i1.p2	TRINITY_DN24175_c0_g1_i1.p1	TRINITY_DN46261_c0_g1_i1.p1	c90553_g1_i1.p1	SMAR009277-PA	TRINITY_DN12243_c0_g1_i1.p1		TRINITY_DN6037_c0_g1_i1.p1	TRINITY_DN3250_c0_g1_i1.p1	TRINITY_DN5896_c0_g1_i1.p1	TRINITY_DN1349_c0_g1_i4.p1	TRINITY_DN803_c0_g1_i5.p1	TRINITY_DN9684_c0_g1_i2.p1	TRINITY_DN4352_c0_g1_i2.p1	TRINITY_DN25381_c0_g1_i1.p1	TRINITY_DN25148_c0_g1_i1.p1	TRINITY_DN73095_c2_g6_i3.p1	TRINITY_DN84748_c2_g1_i3.p1		TRINITY_DN43561_c0_g1_i1.p1	TRINITY_DN5276_c0_g1_i1.p1	TRINITY_DN45796_c0_g1_i1.p1	TRINITY_DN3286_c0_g1_i5.p1	TRINITY_DN5460_c0_g1_i12.p1	TRINITY_DN4411_c0_g1_i1.p1	TRINITY_DN5110_c0_g1_i1.p1	TRINITY_DN23712_c0_g1_i1.p1	TRINITY_DN7671_c0_g1_i1.p1	TRINITY_DN2962_c0_g1_i8.p1	TRINITY_DN558_c0_g1_i2.p1	TRINITY_DN6636_c0_g1_i2.p1	TRINITY_DN934_c0_g1_i4.p1	TRINITY_DN4798_c0_g2_i7.p1	TRINITY_DN1287_c0_g1_i4.p1	TRINITY_DN1211_c0_g1_i5.p1	TRINITY_DN22612_c0_g1_i2.p1	TRINITY_DN29878_c0_g1_i2.p1	TRINITY_DN80561_c0_g1_i2.p1	TRINITY_DN14955_c0_g1_i1.p1
123631at6656	FALSE	38	95	FBpp0080287	TRINITY_DN19141_c0_g3_i1.p1	TRINITY_DN23951_c0_g2_i1.p3	TRINITY_DN46018_c0_g1_i1.p1	c67102_g1_i2.p1	SMAR009688-PA	TRINITY_DN28597_c1_g4_i2.p1	TRINITY_DN38911_c0_g1_i3.p1	TRINITY_DN5586_c0_g1_i2.p1	TRINITY_DN20219_c0_g1_i1.p1	TRINITY_DN21003_c0_g1_i1.p1	TRINITY_DN17228_c0_g1_i1.p1	TRINITY_DN4088_c0_g1_i1.p1		TRINITY_DN8116_c0_g2_i1.p1	TRINITY_DN28654_c0_g1_i3.p1	TRINITY_DN33205_c0_g2_i4.p1	TRINITY_DN71464_c0_g2_i4.p1	TRINITY_DN79866_c0_g1_i1.p1	TRINITY_DN20_c0_g1_i1.p1		TRINITY_DN41795_c0_g1_i1.p1	TRINITY_DN38450_c0_g1_i1.p1	TRINITY_DN19450_c0_g1_i1.p1	TRINITY_DN6424_c0_g1_i2.p1	TRINITY_DN250_c0_g1_i2.p1	TRINITY_DN32969_c0_g1_i1.p1	TRINITY_DN1545_c0_g1_i1.p1	TRINITY_DN4239_c0_g1_i2.p3	TRINITY_DN578_c0_g1_i2.p1	TRINITY_DN2453_c0_g1_i2.p1	TRINITY_DN5045_c0_g2_i1.p1	TRINITY_DN1465_c1_g1_i2.p1	TRINITY_DN4913_c0_g1_i1.p1	TRINITY_DN34653_c0_g1_i2.p1	TRINITY_DN1304_c0_g1_i1.p1	TRINITY_DN1702_c0_g1_i1.p1	TRINITY_DN26731_c0_g1_i1.p1	TRINITY_DN91284_c0_g2_i1.p3	TRINITY_DN2155_c0_g1_i1.p1
123793at6656	FALSE	37	92.5	FBpp0074887	TRINITY_DN13671_c0_g2_i1.p1	TRINITY_DN15978_c0_g2_i1.p1	TRINITY_DN52160_c0_g1_i2.p2	c83480_g1_i1.p1		TRINITY_DN39601_c0_g2_i1.p1	TRINITY_DN36707_c0_g1_i1.p1	TRINITY_DN2915_c0_g1_i1.p1	TRINITY_DN3109_c0_g1_i2.p2	TRINITY_DN30576_c0_g1_i1.p1	TRINITY_DN20116_c0_g1_i2.p1	TRINITY_DN3161_c0_g1_i1.p1	TRINITY_DN21950_c0_g1_i1.p1	TRINITY_DN10196_c0_g1_i1.p2	TRINITY_DN26110_c0_g1_i2.p1	TRINITY_DN20147_c0_g1_i1.p1	TRINITY_DN58292_c0_g1_i1.p1	TRINITY_DN71688_c0_g1_i1.p1			TRINITY_DN1738_c1_g1_i8.p1	TRINITY_DN2919_c0_g1_i1.p1	TRINITY_DN3934_c2_g1_i1.p1	TRINITY_DN970_c0_g1_i2.p1	TRINITY_DN88957_c0_g1_i1.p1	TRINITY_DN53317_c0_g1_i1.p1	TRINITY_DN38891_c0_g1_i1.p1	TRINITY_DN17247_c0_g1_i1.p1	TRINITY_DN6502_c0_g1_i1.p1	TRINITY_DN25095_c0_g1_i1.p1	TRINITY_DN2742_c0_g1_i1.p1	TRINITY_DN2684_c0_g1_i1.p1	TRINITY_DN638_c0_g1_i5.p1	TRINITY_DN41310_c0_g1_i1.p1	TRINITY_DN1945_c0_g1_i1.p2	TRINITY_DN18837_c0_g1_i1.p1	TRINITY_DN25526_c0_g2_i1.p1	TRINITY_DN83141_c1_g1_i2.p1	TRINITY_DN145_c0_g1_i1.p1
94473at6656	TRUE	38	95	FBpp0110438	TRINITY_DN14558_c0_g2_i1.p1	TRINITY_DN24419_c0_g3_i1.p1	TRINITY_DN52791_c0_g1_i4.p1	c88015_g1_i3.p1	SMAR003044-PA	TRINITY_DN25593_c0_g6_i2.p1	TRINITY_DN28309_c0_g1_i1.p1	TRINITY_DN13966_c0_g1_i1.p1	TRINITY_DN15496_c0_g1_i1.p1	TRINITY_DN2164_c0_g2_i1.p1	TRINITY_DN5670_c0_g1_i1.p1	TRINITY_DN22994_c0_g1_i1.p1	TRINITY_DN24338_c0_g1_i1.p1	TRINITY_DN5280_c0_g1_i1.p1	TRINITY_DN30084_c0_g1_i2.p1	TRINITY_DN19008_c0_g2_i1.p1	TRINITY_DN71026_c0_g1_i1.p1	TRINITY_DN83106_c0_g1_i2.p1			TRINITY_DN7476_c0_g2_i1.p1	TRINITY_DN16011_c0_g1_i5.p1	TRINITY_DN3006_c0_g1_i2.p1	TRINITY_DN6948_c0_g1_i2.p1	TRINITY_DN84927_c0_g1_i1.p1	TRINITY_DN23304_c0_g1_i1.p1	TRINITY_DN39185_c0_g1_i1.p1	TRINITY_DN6771_c0_g1_i2.p1	TRINITY_DN4299_c0_g1_i4.p1	TRINITY_DN3134_c0_g1_i3.p1	TRINITY_DN27801_c0_g1_i1.p1	TRINITY_DN9801_c0_g1_i1.p1	TRINITY_DN185_c0_g1_i2.p2	TRINITY_DN6297_c0_g1_i1.p1	TRINITY_DN17911_c0_g1_i1.p1	TRINITY_DN16812_c0_g2_i1.p1	TRINITY_DN30148_c0_g1_i1.p1	TRINITY_DN79860_c0_g1_i2.p1	TRINITY_DN13056_c0_g1_i1.p1
96592at6656	TRUE	38	95	FBpp0078689	TRINITY_DN8797_c0_g1_i1.p1	TRINITY_DN50100_c0_g1_i1.p1	TRINITY_DN59938_c0_g1_i1.p1	c91802_g1_i1.p1	SMAR001365-PA	TRINITY_DN18911_c0_g1_i1.p1	TRINITY_DN5027_c0_g1_i1.p1	TRINITY_DN31406_c0_g1_i1.p1	TRINITY_DN5895_c0_g2_i1.p3	TRINITY_DN21468_c0_g1_i1.p1	TRINITY_DN3028_c0_g1_i1.p1	TRINITY_DN40958_c1_g1_i1.p1		TRINITY_DN18614_c0_g1_i1.p1	TRINITY_DN26801_c0_g1_i1.p1	TRINITY_DN18602_c0_g1_i1.p1	TRINITY_DN48497_c0_g1_i1.p1	TRINITY_DN71504_c0_g1_i1.p1		TRINITY_DN74382_c0_g1_i1.p1	TRINITY_DN1876_c0_g1_i1.p1	TRINITY_DN3832_c0_g1_i2.p1	TRINITY_DN1376_c0_g1_i2.p1	TRINITY_DN4739_c0_g1_i1.p1	TRINITY_DN1256_c0_g1_i1.p1	TRINITY_DN31103_c0_g1_i1.p1	TRINITY_DN2608_c0_g2_i1.p1	TRINITY_DN28532_c0_g1_i1.p1	TRINITY_DN2581_c0_g2_i3.p1	TRINITY_DN4004_c0_g1_i2.p1	TRINITY_DN2647_c0_g1_i1.p1	TRINITY_DN1864_c0_g1_i1.p1	TRINITY_DN948_c0_g1_i1.p1	TRINITY_DN10879_c0_g1_i4.p1	TRINITY_DN22610_c0_g1_i1.p1	TRINITY_DN18077_c0_g1_i1.p1	TRINITY_DN24455_c0_g1_i1.p1	TRINITY_DN63780_c0_g1_i1.p1	TRINITY_DN10718_c0_g1_i1.p1
97492at6656	TRUE	38	95	FBpp0089041	TRINITY_DN11946_c0_g1_i1.p1	TRINITY_DN57394_c0_g1_i1.p1	TRINITY_DN43194_c0_g1_i1.p1	c77000_g1_i1.p1	SMAR015510-PA	TRINITY_DN12784_c0_g2_i1.p1	TRINITY_DN25568_c0_g4_i1.p1	TRINITY_DN963_c0_g1_i3.p1	TRINITY_DN1401_c0_g1_i2.p1	TRINITY_DN2387_c0_g2_i3.p1	TRINITY_DN24105_c0_g1_i1.p1	TRINITY_DN5132_c0_g1_i1.p1		TRINITY_DN2224_c0_g1_i1.p1	TRINITY_DN30063_c0_g1_i1.p1	TRINITY_DN57724_c0_g1_i1.p1	TRINITY_DN21341_c0_g1_i1.p1	TRINITY_DN79476_c0_g1_i1.p1	TRINITY_DN37410_c0_g2_i2.p1	TRINITY_DN74509_c0_g1_i1.p1	TRINITY_DN34169_c0_g1_i1.p1	TRINITY_DN632_c0_g1_i1.p1	TRINITY_DN2006_c0_g1_i1.p1	TRINITY_DN817_c0_g1_i1.p1	TRINITY_DN17109_c0_g1_i2.p1	TRINITY_DN22621_c0_g1_i1.p1	TRINITY_DN1140_c0_g1_i3.p1	TRINITY_DN4595_c0_g1_i1.p1	TRINITY_DN1963_c0_g1_i3.p1	TRINITY_DN847_c0_g1_i1.p1	TRINITY_DN1086_c0_g1_i1.p1	TRINITY_DN1039_c0_g1_i11.p1	TRINITY_DN15405_c0_g1_i1.p1	TRINITY_DN1952_c0_g1_i2.p1	TRINITY_DN1852_c0_g2_i2.p1		TRINITY_DN28766_c0_g1_i1.p1	TRINITY_DN73014_c0_g1_i1.p1	TRINITY_DN15046_c0_g1_i1.p1
98845at6656	TRUE	38	95	FBpp0086066	TRINITY_DN12641_c0_g1_i2.p1	TRINITY_DN37873_c0_g1_i1.p1	TRINITY_DN36062_c0_g1_i1.p1	c82995_g1_i1.p1	SMAR014223-PA	TRINITY_DN18273_c0_g4_i1.p1	TRINITY_DN6657_c0_g2_i1.p1	TRINITY_DN33911_c0_g1_i1.p1	TRINITY_DN10152_c0_g1_i1.p1	TRINITY_DN31172_c0_g1_i1.p1	TRINITY_DN22377_c0_g1_i1.p1	TRINITY_DN5179_c0_g1_i2.p1		TRINITY_DN28703_c0_g1_i1.p1	TRINITY_DN87318_c0_g1_i1.p1	TRINITY_DN13201_c0_g1_i1.p1	TRINITY_DN61217_c0_g2_i1.p1	TRINITY_DN71555_c0_g1_i1.p1		TRINITY_DN13343_c0_g2_i1.p1	TRINITY_DN32704_c0_g1_i1.p1	TRINITY_DN1685_c0_g1_i1.p1	TRINITY_DN790_c0_g1_i5.p2	TRINITY_DN4923_c0_g2_i1.p1	TRINITY_DN5987_c0_g1_i1.p1	TRINITY_DN1697_c0_g1_i2.p1	TRINITY_DN1871_c0_g1_i20.p1	TRINITY_DN35522_c0_g1_i1.p1	TRINITY_DN28528_c0_g1_i1.p1	TRINITY_DN8512_c0_g1_i2.p2	TRINITY_DN8272_c0_g1_i1.p1	TRINITY_DN3304_c0_g1_i9.p1	TRINITY_DN1026_c0_g1_i3.p1	TRINITY_DN8132_c0_g1_i1.p1	TRINITY_DN9917_c0_g1_i1.p1	TRINITY_DN39996_c0_g1_i1.p1	TRINITY_DN26808_c0_g1_i1.p1	TRINITY_DN49322_c0_g1_i1.p1	TRINITY_DN6173_c0_g1_i1.p1
129989at6656	FALSE	37	92.5	FBpp0078032	TRINITY_DN8229_c0_g1_i1.p1	TRINITY_DN61580_c0_g1_i1.p1	TRINITY_DN45697_c0_g1_i1.p1	c70506_g1_i1.p1	SMAR008950-PA	TRINITY_DN21564_c0_g1_i1.p1	TRINITY_DN24568_c0_g2_i1.p1	TRINITY_DN3002_c0_g1_i1.p1	TRINITY_DN6129_c0_g1_i1.p2	TRINITY_DN4554_c0_g1_i1.p1	TRINITY_DN1387_c0_g1_i2.p1	TRINITY_DN13025_c0_g1_i1.p1	TRINITY_DN133_c0_g1_i2.p1	TRINITY_DN6999_c0_g1_i1.p1		TRINITY_DN20472_c0_g2_i1.p1	TRINITY_DN128668_c0_g1_i1.p1	TRINITY_DN70219_c0_g1_i3.p1			TRINITY_DN12773_c0_g5_i1.p1	TRINITY_DN121_c0_g1_i1.p1	TRINITY_DN7058_c0_g1_i3.p2	TRINITY_DN350_c0_g1_i2.p1	TRINITY_DN245_c0_g2_i1.p1	TRINITY_DN2273_c0_g1_i1.p1	TRINITY_DN17496_c1_g1_i1.p1	TRINITY_DN14840_c0_g1_i6.p2	TRINITY_DN19455_c0_g1_i1.p1	TRINITY_DN23322_c0_g1_i1.p1	TRINITY_DN1680_c0_g1_i1.p1	TRINITY_DN5400_c0_g1_i5.p1	TRINITY_DN2056_c0_g1_i11.p1	TRINITY_DN10020_c0_g3_i1.p1	TRINITY_DN14666_c0_g1_i1.p1	TRINITY_DN2663_c0_g1_i1.p1	TRINITY_DN30545_c0_g4_i1.p1	TRINITY_DN72870_c0_g1_i5.p1	TRINITY_DN2219_c0_g1_i1.p1
99307at6656	TRUE	38	95	FBpp0086223	TRINITY_DN18688_c0_g2_i2.p1	TRINITY_DN26905_c0_g1_i1.p3	TRINITY_DN44269_c0_g1_i1.p1	c94404_g1_i1.p2	SMAR007622-PA	TRINITY_DN22601_c0_g1_i1.p1	TRINITY_DN69323_c0_g1_i1.p1	TRINITY_DN2072_c0_g1_i4.p2	TRINITY_DN1067_c0_g1_i23.p1	TRINITY_DN3255_c0_g1_i1.p1	TRINITY_DN16677_c0_g1_i1.p1	TRINITY_DN6462_c0_g1_i2.p1		TRINITY_DN2344_c0_g1_i2.p1	TRINITY_DN2068_c0_g1_i1.p1	TRINITY_DN31439_c0_g2_i9.p1	TRINITY_DN18067_c0_g1_i1.p1	TRINITY_DN75194_c0_g1_i1.p1		TRINITY_DN36940_c0_g1_i1.p1	TRINITY_DN1852_c0_g1_i5.p1	TRINITY_DN45609_c0_g1_i1.p1	TRINITY_DN24877_c0_g1_i1.p1	TRINITY_DN2976_c0_g1_i1.p2	TRINITY_DN10357_c0_g2_i1.p1	TRINITY_DN34921_c0_g1_i2.p1	TRINITY_DN5751_c0_g1_i12.p1	TRINITY_DN3505_c0_g1_i1.p1	TRINITY_DN5919_c0_g1_i2.p1	TRINITY_DN2246_c0_g1_i2.p2	TRINITY_DN23855_c0_g1_i1.p1	TRINITY_DN2757_c0_g1_i3.p1	TRINITY_DN8252_c0_g2_i1.p1	TRINITY_DN2085_c0_g1_i1.p1	TRINITY_DN1968_c0_g1_i1.p1	TRINITY_DN43554_c0_g1_i1.p1	TRINITY_DN26370_c0_g1_i1.p1	TRINITY_DN82306_c0_g1_i1.p1	TRINITY_DN9985_c0_g1_i1.p1
100136at6656	TRUE	38	95	FBpp0084729	TRINITY_DN14019_c0_g2_i1.p1	TRINITY_DN33888_c0_g2_i1.p2	TRINITY_DN48110_c0_g1_i2.p1	c80054_g1_i1.p1	SMAR003922-PA	TRINITY_DN23965_c0_g2_i1.p1	TRINITY_DN14593_c0_g1_i1.p1	TRINITY_DN10366_c0_g1_i3.p1	TRINITY_DN19761_c0_g1_i1.p1	TRINITY_DN8066_c0_g1_i1.p2	TRINITY_DN5984_c0_g1_i1.p1	TRINITY_DN1781_c0_g1_i1.p1	TRINITY_DN742_c0_g1_i3.p1	TRINITY_DN23377_c0_g1_i1.p1	TRINITY_DN21943_c0_g1_i1.p1	TRINITY_DN22387_c0_g1_i1.p1	TRINITY_DN72303_c0_g2_i5.p1	TRINITY_DN86825_c2_g1_i2.p2			TRINITY_DN2295_c0_g2_i1.p1	TRINITY_DN45484_c0_g1_i1.p2	TRINITY_DN2510_c0_g1_i2.p1	TRINITY_DN3828_c0_g3_i1.p1	TRINITY_DN75619_c0_g1_i1.p1	TRINITY_DN6967_c0_g1_i5.p1	TRINITY_DN14770_c0_g2_i2.p1	TRINITY_DN4308_c0_g1_i1.p1	TRINITY_DN10632_c0_g1_i2.p1	TRINITY_DN8383_c0_g1_i3.p1	TRINITY_DN3066_c0_g1_i2.p2	TRINITY_DN8599_c0_g1_i6.p1	TRINITY_DN2912_c0_g4_i1.p2	TRINITY_DN2500_c0_g1_i6.p2	TRINITY_DN9821_c0_g1_i1.p1	TRINITY_DN15474_c0_g1_i1.p1	TRINITY_DN28549_c0_g2_i2.p1	TRINITY_DN61675_c0_g1_i1.p1	TRINITY_DN11586_c0_g2_i1.p1
105000at6656	TRUE	38	95	FBpp0076648	TRINITY_DN69219_c0_g2_i1.p1	TRINITY_DN33681_c0_g1_i1.p1	TRINITY_DN46058_c0_g1_i2.p1	c88450_g1_i1.p1	SMAR003535-PA	TRINITY_DN5250_c0_g1_i1.p1	TRINITY_DN6156_c0_g1_i1.p1	TRINITY_DN34552_c0_g1_i1.p1	TRINITY_DN3073_c0_g1_i4.p1	TRINITY_DN6745_c0_g1_i1.p1	TRINITY_DN4009_c0_g1_i1.p1	TRINITY_DN6612_c0_g1_i3.p1	TRINITY_DN4701_c2_g1_i1.p1	TRINITY_DN4499_c0_g1_i1.p1	TRINITY_DN23032_c0_g2_i1.p1	TRINITY_DN28961_c0_g1_i7.p1	TRINITY_DN114834_c0_g1_i1.p1	TRINITY_DN71420_c0_g1_i1.p1			TRINITY_DN4605_c1_g1_i4.p1	TRINITY_DN8048_c0_g1_i1.p1	TRINITY_DN17290_c0_g1_i1.p1	TRINITY_DN8237_c0_g1_i1.p1	TRINITY_DN23190_c0_g1_i1.p1	TRINITY_DN22762_c0_g1_i1.p1	TRINITY_DN5435_c0_g1_i2.p1	TRINITY_DN8348_c0_g1_i2.p1	TRINITY_DN1744_c0_g1_i2.p1	TRINITY_DN32424_c0_g1_i1.p1	TRINITY_DN5945_c0_g1_i3.p1	TRINITY_DN5949_c0_g1_i1.p1	TRINITY_DN2794_c0_g1_i15.p1	TRINITY_DN5447_c0_g1_i2.p1	TRINITY_DN16073_c0_g1_i1.p1	TRINITY_DN11361_c0_g1_i2.p1	TRINITY_DN27833_c2_g1_i4.p1	TRINITY_DN88659_c0_g1_i1.p1	TRINITY_DN13201_c5_g1_i1.p1
112328at6656	TRUE	38	95	FBpp0081639	TRINITY_DN14101_c0_g2_i1.p1	TRINITY_DN34221_c0_g2_i1.p2	TRINITY_DN53099_c6_g2_i2.p1	c99717_g1_i1.p2	SMAR010801-PA	TRINITY_DN20115_c0_g2_i1.p1	TRINITY_DN32739_c0_g2_i1.p1	TRINITY_DN14803_c0_g1_i5.p1	TRINITY_DN3769_c0_g1_i8.p3	TRINITY_DN6818_c0_g2_i1.p1	TRINITY_DN28453_c0_g1_i2.p1	TRINITY_DN639_c0_g1_i2.p1	TRINITY_DN3882_c0_g1_i1.p1	TRINITY_DN31126_c0_g1_i1.p1	TRINITY_DN75142_c0_g1_i1.p1	TRINITY_DN27410_c0_g3_i1.p1	TRINITY_DN55350_c0_g1_i1.p1	TRINITY_DN52260_c0_g1_i1.p1			TRINITY_DN5718_c0_g1_i1.p1	TRINITY_DN3670_c0_g1_i3.p1	TRINITY_DN2623_c0_g1_i10.p1	TRINITY_DN3877_c0_g1_i1.p2	TRINITY_DN44181_c0_g1_i1.p1	TRINITY_DN51967_c0_g1_i1.p1	TRINITY_DN3508_c1_g1_i4.p2	TRINITY_DN2495_c0_g1_i1.p1	TRINITY_DN2916_c0_g2_i17.p2	TRINITY_DN2645_c0_g3_i3.p1	TRINITY_DN4160_c0_g1_i4.p1	TRINITY_DN2047_c0_g1_i4.p1	TRINITY_DN303_c0_g1_i2.p1	TRINITY_DN11007_c0_g1_i1.p1	TRINITY_DN1397_c0_g1_i3.p1	TRINITY_DN31411_c0_g1_i1.p1	TRINITY_DN22912_c0_g1_i1.p1	TRINITY_DN40555_c0_g1_i1.p1	TRINITY_DN13277_c0_g6_i4.p1
117413at6656	TRUE	38	95	FBpp0078318	TRINITY_DN20146_c0_g1_i1.p1	TRINITY_DN31829_c0_g1_i1.p2	TRINITY_DN41494_c0_g1_i2.p1	c85525_g1_i2.p1	SMAR006627-PA	TRINITY_DN20283_c0_g1_i1.p1	TRINITY_DN34926_c0_g2_i1.p1	TRINITY_DN15869_c0_g1_i2.p1	TRINITY_DN15520_c0_g1_i2.p1	TRINITY_DN2903_c0_g1_i1.p1	TRINITY_DN5427_c0_g1_i3.p1	TRINITY_DN4223_c0_g1_i3.p1		TRINITY_DN3223_c0_g1_i2.p1	TRINITY_DN31043_c0_g3_i6.p1	TRINITY_DN23277_c0_g1_i1.p1	TRINITY_DN65187_c0_g1_i1.p1	TRINITY_DN81080_c0_g1_i1.p1	TRINITY_DN45330_c0_g1_i1.p1		TRINITY_DN29726_c0_g1_i1.p1	TRINITY_DN40019_c0_g1_i1.p1	TRINITY_DN7064_c0_g1_i1.p1	TRINITY_DN1071_c0_g3_i1.p2	TRINITY_DN31630_c0_g1_i1.p1	TRINITY_DN1594_c0_g1_i7.p1	TRINITY_DN5672_c0_g1_i2.p2	TRINITY_DN2661_c0_g1_i1.p1	TRINITY_DN2083_c0_g1_i12.p1	TRINITY_DN7027_c0_g1_i1.p1	TRINITY_DN2069_c0_g1_i1.p1	TRINITY_DN3524_c0_g1_i11.p1	TRINITY_DN2179_c0_g1_i8.p1	TRINITY_DN16192_c0_g1_i5.p1	TRINITY_DN6530_c0_g1_i2.p1	TRINITY_DN45377_c0_g1_i1.p1	TRINITY_DN29865_c0_g1_i1.p1	TRINITY_DN91241_c8_g10_i1.p1	TRINITY_DN14288_c0_g1_i1.p1
135526at6656	FALSE	37	92.5	FBpp0077873	TRINITY_DN4623_c0_g2_i1.p1	TRINITY_DN29510_c0_g1_i1.p1	TRINITY_DN49323_c0_g2_i1.p1	c68719_g2_i2.p1	SMAR015738-PA	TRINITY_DN22486_c0_g2_i1.p1	TRINITY_DN34558_c0_g1_i1.p1	TRINITY_DN40189_c0_g1_i1.p1	TRINITY_DN26186_c0_g1_i1.p1	TRINITY_DN3535_c0_g1_i3.p1	TRINITY_DN21809_c0_g1_i3.p1	TRINITY_DN15892_c0_g1_i2.p1	TRINITY_DN7566_c0_g1_i3.p1	TRINITY_DN26794_c0_g1_i1.p1	TRINITY_DN3559_c0_g1_i1.p1	TRINITY_DN32968_c0_g1_i2.p1	TRINITY_DN66457_c0_g1_i1.p1	TRINITY_DN74246_c0_g1_i1.p1			TRINITY_DN2631_c2_g1_i1.p1	TRINITY_DN38851_c0_g1_i1.p1	TRINITY_DN7040_c0_g1_i1.p1	TRINITY_DN7734_c0_g1_i4.p1		TRINITY_DN23316_c0_g1_i1.p1	TRINITY_DN39444_c0_g1_i1.p1	TRINITY_DN6503_c0_g1_i2.p1	TRINITY_DN3676_c0_g3_i9.p1	TRINITY_DN13201_c0_g1_i1.p1	TRINITY_DN1438_c0_g3_i1.p1	TRINITY_DN11548_c0_g1_i2.p1	TRINITY_DN19779_c0_g1_i1.p1	TRINITY_DN8096_c0_g1_i1.p1	TRINITY_DN27639_c0_g1_i1.p1	TRINITY_DN39470_c0_g1_i1.p1	TRINITY_DN1430_c0_g2_i1.p1	TRINITY_DN89155_c0_g1_i4.p1	TRINITY_DN12132_c0_g3_i1.p1
121847at6656	TRUE	38	95	FBpp0289146	TRINITY_DN9836_c0_g1_i1.p1	TRINITY_DN27322_c0_g1_i1.p1	TRINITY_DN50942_c0_g2_i1.p1	c95802_g1_i1.p1	SMAR004720-PA	TRINITY_DN24846_c0_g2_i1.p2	TRINITY_DN794_c0_g1_i1.p1	TRINITY_DN20509_c0_g1_i1.p1	TRINITY_DN23014_c0_g1_i1.p1	TRINITY_DN27118_c0_g1_i1.p1	TRINITY_DN21722_c0_g1_i1.p1	TRINITY_DN5584_c0_g4_i1.p1	TRINITY_DN37583_c0_g1_i2.p1	TRINITY_DN1064_c0_g2_i3.p1		TRINITY_DN20099_c1_g2_i1.p1	TRINITY_DN49801_c0_g1_i1.p1	TRINITY_DN81367_c0_g1_i2.p1		TRINITY_DN65734_c0_g1_i1.p1	TRINITY_DN15270_c0_g2_i1.p1	TRINITY_DN41153_c0_g1_i1.p1	TRINITY_DN3114_c0_g1_i1.p1	TRINITY_DN39832_c0_g1_i1.p1	TRINITY_DN33404_c0_g1_i1.p1	TRINITY_DN31135_c0_g1_i1.p1	TRINITY_DN3285_c0_g1_i4.p3	TRINITY_DN4414_c0_g1_i12.p1	TRINITY_DN2473_c0_g1_i1.p1	TRINITY_DN5934_c0_g1_i1.p1	TRINITY_DN5139_c0_g1_i4.p1	TRINITY_DN5414_c0_g1_i4.p1	TRINITY_DN3114_c0_g1_i3.p1	TRINITY_DN5254_c0_g1_i1.p1	TRINITY_DN898_c1_g1_i1.p1	TRINITY_DN22770_c0_g1_i1.p1	TRINITY_DN30460_c1_g1_i11.p1	TRINITY_DN87545_c5_g5_i1.p1	TRINITY_DN10591_c1_g1_i1.p1
138659at6656	FALSE	38	95	FBpp0083849	TRINITY_DN34307_c0_g1_i1.p1	TRINITY_DN24713_c0_g1_i2.p1	TRINITY_DN47541_c0_g1_i1.p1	c88508_g2_i1.p1	SMAR001977-PA	TRINITY_DN26965_c0_g3_i1.p2	TRINITY_DN38313_c0_g1_i2.p1	TRINITY_DN1058_c0_g1_i5.p1	TRINITY_DN1304_c0_g1_i2.p1	TRINITY_DN1770_c0_g1_i1.p1	TRINITY_DN1244_c0_g1_i3.p1	TRINITY_DN1220_c0_g1_i1.p1	TRINITY_DN53_c0_g1_i1.p1	TRINITY_DN2313_c0_g1_i1.p1		TRINITY_DN33496_c1_g2_i1.p1	TRINITY_DN71180_c0_g2_i2.p3	TRINITY_DN82697_c1_g1_i1.p1	TRINITY_DN40880_c0_g1_i1.p1		TRINITY_DN37117_c0_g1_i1.p1	TRINITY_DN3619_c0_g1_i5.p1	TRINITY_DN3473_c0_g1_i1.p1	TRINITY_DN2591_c0_g1_i1.p2	TRINITY_DN2038_c0_g1_i1.p1	TRINITY_DN1928_c0_g2_i1.p1	TRINITY_DN1763_c0_g1_i1.p1	TRINITY_DN3955_c0_g1_i2.p1	TRINITY_DN10836_c0_g1_i1.p1	TRINITY_DN2198_c0_g1_i2.p1	TRINITY_DN391_c0_g1_i3.p1	TRINITY_DN6025_c0_g1_i4.p1	TRINITY_DN2277_c0_g1_i1.p1	TRINITY_DN1583_c0_g1_i3.p1	TRINITY_DN6049_c0_g1_i2.p1	TRINITY_DN22621_c0_g2_i1.p1	TRINITY_DN28541_c0_g2_i2.p1	TRINITY_DN85878_c1_g2_i1.p1	TRINITY_DN12323_c3_g2_i1.p1
123035at6656	TRUE	38	95	FBpp0070295	TRINITY_DN13615_c0_g1_i1.p1	TRINITY_DN16511_c0_g1_i1.p1	TRINITY_DN73462_c0_g1_i1.p1	c90001_g1_i2.p1	SMAR012353-PA	TRINITY_DN22578_c0_g2_i3.p1	TRINITY_DN42139_c7_g1_i1.p1	TRINITY_DN37917_c0_g1_i1.p1	TRINITY_DN2151_c0_g1_i2.p1	TRINITY_DN17619_c0_g1_i2.p1	TRINITY_DN3801_c0_g1_i2.p1	TRINITY_DN5834_c0_g1_i2.p1	TRINITY_DN39964_c0_g1_i1.p1	TRINITY_DN23669_c0_g1_i2.p1	TRINITY_DN29540_c0_g1_i1.p1	TRINITY_DN33359_c4_g4_i5.p1	TRINITY_DN67962_c0_g2_i1.p1	TRINITY_DN155085_c0_g1_i1.p1		TRINITY_DN63480_c15_g1_i1.p1	TRINITY_DN52812_c0_g1_i1.p1		TRINITY_DN4862_c0_g1_i2.p1	TRINITY_DN2750_c0_g1_i2.p1	TRINITY_DN57612_c0_g1_i1.p1	TRINITY_DN5606_c0_g2_i2.p1	TRINITY_DN8059_c0_g1_i1.p1	TRINITY_DN7550_c0_g1_i1.p1	TRINITY_DN767_c0_g1_i4.p1	TRINITY_DN15610_c0_g1_i1.p1	TRINITY_DN28740_c0_g1_i2.p1	TRINITY_DN9515_c0_g1_i2.p1	TRINITY_DN23309_c0_g1_i1.p1	TRINITY_DN5043_c0_g1_i2.p1	TRINITY_DN14317_c0_g1_i1.p1	TRINITY_DN23634_c0_g1_i1.p1	TRINITY_DN28724_c0_g1_i3.p1	TRINITY_DN92646_c11_g22_i1.p1	TRINITY_DN10451_c0_g1_i1.p1
126483at6656	TRUE	38	95	FBpp0080255	TRINITY_DN2411_c0_g1_i1.p1	TRINITY_DN32088_c5_g1_i1.p2	TRINITY_DN52535_c1_g1_i2.p1	c90353_g1_i4.p2	SMAR007399-PA	TRINITY_DN23543_c0_g1_i3.p1	TRINITY_DN40710_c0_g1_i3.p1	TRINITY_DN460_c0_g1_i6.p1	TRINITY_DN1039_c0_g1_i16.p1	TRINITY_DN1270_c0_g1_i9.p1	TRINITY_DN5300_c0_g1_i1.p2	TRINITY_DN2391_c0_g1_i1.p1	TRINITY_DN992_c0_g1_i4.p1	TRINITY_DN1635_c0_g2_i1.p1	TRINITY_DN30590_c0_g2_i1.p1	TRINITY_DN24063_c0_g1_i1.p2		TRINITY_DN82035_c0_g2_i1.p1		TRINITY_DN75309_c0_g1_i1.p1	TRINITY_DN1635_c0_g1_i4.p1	TRINITY_DN1116_c0_g1_i1.p1	TRINITY_DN17850_c0_g1_i1.p1	TRINITY_DN5685_c0_g1_i2.p2	TRINITY_DN4107_c0_g1_i1.p1	TRINITY_DN1572_c0_g1_i3.p1	TRINITY_DN4495_c0_g1_i1.p1	TRINITY_DN13202_c0_g1_i1.p2	TRINITY_DN2394_c0_g1_i1.p2	TRINITY_DN5576_c0_g1_i4.p2	TRINITY_DN2238_c0_g1_i10.p2	TRINITY_DN1105_c0_g1_i8.p1	TRINITY_DN1706_c0_g1_i2.p2	TRINITY_DN8762_c0_g2_i2.p1	TRINITY_DN13658_c0_g1_i1.p1	TRINITY_DN41197_c0_g1_i1.p1	TRINITY_DN26186_c0_g1_i1.p1	TRINITY_DN61727_c0_g1_i1.p1	TRINITY_DN12263_c0_g2_i1.p2
131751at6656	TRUE	38	95	FBpp0082110	TRINITY_DN12812_c0_g2_i1.p1	TRINITY_DN20589_c0_g3_i1.p1	TRINITY_DN14003_c0_g2_i1.p1	c65845_g1_i1.p1	SMAR014193-PA	TRINITY_DN24258_c0_g1_i1.p1	TRINITY_DN28214_c0_g2_i1.p1	TRINITY_DN3463_c0_g1_i1.p1	TRINITY_DN18850_c0_g1_i1.p1	TRINITY_DN22564_c0_g1_i1.p1	TRINITY_DN608_c0_g1_i1.p1	TRINITY_DN35442_c0_g1_i1.p1		TRINITY_DN343_c0_g1_i5.p1	TRINITY_DN32206_c3_g13_i1.p1	TRINITY_DN32582_c0_g1_i2.p1	TRINITY_DN73873_c3_g5_i1.p1	TRINITY_DN33581_c0_g1_i1.p1		TRINITY_DN48383_c0_g1_i1.p1	TRINITY_DN39732_c0_g1_i1.p1	TRINITY_DN38522_c0_g1_i1.p1	TRINITY_DN1932_c0_g1_i2.p1	TRINITY_DN4133_c0_g1_i2.p1	TRINITY_DN15250_c0_g1_i1.p1	TRINITY_DN4428_c0_g1_i4.p1	TRINITY_DN2940_c0_g1_i1.p1	TRINITY_DN804_c0_g1_i6.p1	TRINITY_DN16450_c0_g1_i1.p1	TRINITY_DN1625_c0_g1_i4.p1	TRINITY_DN169_c0_g1_i3.p1	TRINITY_DN1544_c0_g1_i1.p1	TRINITY_DN869_c0_g1_i1.p1	TRINITY_DN301_c0_g1_i2.p1	TRINITY_DN2057_c0_g1_i3.p1	TRINITY_DN13456_c0_g1_i1.p1	TRINITY_DN16558_c0_g1_i1.p1	TRINITY_DN92259_c2_g3_i1.p1	TRINITY_DN11286_c0_g1_i1.p1
134885at6656	TRUE	38	95	FBpp0084616	TRINITY_DN8454_c0_g1_i1.p1	TRINITY_DN26410_c0_g1_i2.p2	TRINITY_DN41770_c0_g2_i1.p1	c92630_g1_i1.p1	SMAR001507-PA	TRINITY_DN22047_c0_g1_i1.p1	TRINITY_DN41425_c0_g3_i3.p1	TRINITY_DN11703_c0_g1_i4.p1	TRINITY_DN6744_c0_g1_i4.p1	TRINITY_DN8599_c0_g1_i1.p1	TRINITY_DN26843_c0_g1_i1.p1	TRINITY_DN6478_c0_g1_i2.p1	TRINITY_DN25958_c0_g1_i1.p1	TRINITY_DN27260_c0_g1_i1.p1	TRINITY_DN24919_c0_g1_i1.p1	TRINITY_DN27851_c0_g1_i1.p1	TRINITY_DN65596_c1_g1_i1.p1	TRINITY_DN74520_c0_g1_i1.p1			TRINITY_DN12109_c0_g1_i3.p1	TRINITY_DN11712_c0_g1_i1.p1	TRINITY_DN17648_c0_g1_i1.p1	TRINITY_DN3550_c2_g1_i9.p1	TRINITY_DN74911_c0_g1_i1.p1	TRINITY_DN42350_c0_g1_i2.p1	TRINITY_DN34628_c0_g1_i1.p1	TRINITY_DN9244_c0_g1_i1.p1	TRINITY_DN2656_c0_g1_i3.p1	TRINITY_DN28623_c0_g1_i2.p1	TRINITY_DN2694_c0_g1_i1.p2	TRINITY_DN23611_c0_g1_i5.p1	TRINITY_DN6337_c0_g2_i11.p1	TRINITY_DN3665_c0_g1_i1.p1	TRINITY_DN9954_c0_g1_i1.p1	TRINITY_DN45557_c0_g1_i1.p1	TRINITY_DN27320_c1_g2_i2.p1	TRINITY_DN86472_c0_g2_i1.p1	TRINITY_DN5935_c0_g1_i1.p1
149977at6656	TRUE	38	95	FBpp0071553	TRINITY_DN468_c0_g2_i1.p1	TRINITY_DN24579_c0_g2_i1.p1	TRINITY_DN44433_c0_g1_i1.p1	c80377_g1_i2.p1	SMAR000760-PA	TRINITY_DN40554_c0_g1_i1.p1	TRINITY_DN37525_c0_g1_i3.p1	TRINITY_DN435_c0_g1_i2.p3	TRINITY_DN116_c0_g1_i1.p3	TRINITY_DN14996_c0_g1_i1.p1	TRINITY_DN8168_c0_g1_i3.p1	TRINITY_DN34405_c0_g1_i1.p1	TRINITY_DN3831_c0_g2_i1.p1	TRINITY_DN2168_c0_g1_i1.p1	TRINITY_DN806_c0_g1_i1.p1	TRINITY_DN27793_c1_g1_i1.p2	TRINITY_DN16618_c0_g1_i1.p1			TRINITY_DN40427_c1_g1_i1.p1	TRINITY_DN2506_c1_g1_i1.p1	TRINITY_DN40515_c0_g1_i1.p1	TRINITY_DN2815_c1_g1_i1.p1	TRINITY_DN2091_c0_g1_i1.p1	TRINITY_DN66590_c0_g1_i1.p1	TRINITY_DN63547_c0_g1_i1.p1	TRINITY_DN4664_c0_g1_i14.p2	TRINITY_DN5495_c0_g1_i2.p1	TRINITY_DN2386_c0_g2_i1.p4	TRINITY_DN10161_c0_g1_i1.p1	TRINITY_DN980_c0_g1_i2.p1	TRINITY_DN6756_c0_g1_i5.p1	TRINITY_DN690_c1_g1_i1.p2	TRINITY_DN4935_c0_g1_i3.p1	TRINITY_DN14486_c0_g1_i2.p2	TRINITY_DN11489_c0_g1_i1.p1	TRINITY_DN13368_c0_g1_i1.p1	TRINITY_DN76377_c0_g1_i1.p1	TRINITY_DN13699_c0_g1_i1.p1
150479at6656	TRUE	38	95	FBpp0073762	TRINITY_DN9985_c0_g1_i1.p1	TRINITY_DN26715_c0_g1_i1.p3	TRINITY_DN51076_c0_g1_i1.p2	c77959_g1_i1.p1	SMAR015223-PA	TRINITY_DN15617_c0_g1_i1.p1		TRINITY_DN3557_c0_g1_i1.p1	TRINITY_DN2953_c0_g1_i6.p1	TRINITY_DN28306_c0_g1_i1.p1	TRINITY_DN17008_c0_g1_i1.p1	TRINITY_DN2036_c0_g1_i1.p1	TRINITY_DN3280_c0_g1_i4.p1	TRINITY_DN4313_c0_g1_i1.p1	TRINITY_DN29508_c1_g2_i1.p1	TRINITY_DN32062_c1_g1_i5.p1	TRINITY_DN87_c0_g1_i1.p1	TRINITY_DN27727_c0_g1_i1.p1	TRINITY_DN70944_c0_g1_i1.p1	TRINITY_DN5633_c0_g1_i1.p1	TRINITY_DN1773_c0_g1_i1.p1	TRINITY_DN985_c0_g1_i2.p1	TRINITY_DN3153_c0_g1_i4.p1	TRINITY_DN12776_c0_g1_i1.p1	TRINITY_DN3193_c0_g1_i1.p1	TRINITY_DN881_c0_g1_i1.p1	TRINITY_DN9352_c0_g1_i3.p1	TRINITY_DN25022_c0_g1_i1.p1	TRINITY_DN1364_c0_g1_i26.p2	TRINITY_DN6468_c0_g1_i1.p1	TRINITY_DN11652_c0_g1_i2.p1	TRINITY_DN3757_c0_g1_i8.p1	TRINITY_DN3365_c1_g1_i1.p3	TRINITY_DN5626_c0_g1_i1.p1	TRINITY_DN19597_c0_g1_i1.p1		TRINITY_DN13773_c0_g1_i1.p1	TRINITY_DN50982_c0_g1_i1.p1	TRINITY_DN12139_c0_g2_i2.p1
150583at6656	TRUE	38	95	FBpp0071462	TRINITY_DN19446_c0_g15_i1.p1	TRINITY_DN20768_c0_g2_i1.p1	TRINITY_DN31532_c0_g1_i1.p1	c84956_g2_i1.p1	SMAR013236-PA			TRINITY_DN44224_c0_g1_i1.p1	TRINITY_DN1750_c0_g1_i10.p2	TRINITY_DN11797_c0_g1_i1.p1	TRINITY_DN5213_c0_g1_i1.p1	TRINITY_DN21908_c0_g1_i1.p2	TRINITY_DN8128_c0_g1_i1.p1	TRINITY_DN8526_c0_g2_i1.p1	TRINITY_DN48853_c0_g1_i1.p1	TRINITY_DN2895_c0_g1_i1.p1	TRINITY_DN70122_c0_g2_i1.p1	TRINITY_DN32217_c0_g1_i1.p1	TRINITY_DN88462_c0_g1_i1.p1	TRINITY_DN43443_c0_g1_i1.p1	TRINITY_DN50132_c0_g1_i1.p1	TRINITY_DN387_c1_g1_i2.p1	TRINITY_DN17666_c0_g1_i1.p1	TRINITY_DN1064_c0_g1_i2.p1	TRINITY_DN76272_c0_g1_i1.p1	TRINITY_DN40472_c0_g1_i1.p1	TRINITY_DN4525_c0_g1_i1.p1	TRINITY_DN3350_c0_g1_i2.p1	TRINITY_DN6111_c0_g1_i1.p1	TRINITY_DN11233_c0_g1_i1.p1	TRINITY_DN6094_c0_g1_i1.p2	TRINITY_DN4346_c0_g1_i1.p1	TRINITY_DN3056_c0_g1_i1.p2	TRINITY_DN1304_c0_g1_i2.p2	TRINITY_DN2260_c0_g1_i1.p1	TRINITY_DN21211_c0_g1_i2.p1	TRINITY_DN27351_c1_g2_i3.p1	TRINITY_DN69886_c0_g3_i2.p1	TRINITY_DN7685_c0_g1_i1.p1
150327at6656	FALSE	37	92.5	FBpp0080564	TRINITY_DN4405_c0_g1_i1.p1	TRINITY_DN3133_c0_g1_i1.p1	TRINITY_DN52080_c0_g1_i1.p4	c23200_g1_i1.p1	SMAR007883-PA	TRINITY_DN23690_c0_g6_i1.p1		TRINITY_DN1791_c0_g1_i12.p5	TRINITY_DN572_c0_g2_i46.p2	TRINITY_DN3446_c0_g1_i3.p1	TRINITY_DN1490_c0_g3_i1.p1	TRINITY_DN2547_c0_g1_i4.p1	TRINITY_DN12846_c0_g1_i1.p1	TRINITY_DN1452_c0_g1_i2.p4		TRINITY_DN33739_c1_g4_i2.p2	TRINITY_DN59077_c0_g1_i1.p1	TRINITY_DN79197_c0_g1_i2.p1		TRINITY_DN70480_c0_g1_i1.p1	TRINITY_DN9653_c0_g1_i1.p1	TRINITY_DN1823_c1_g3_i1.p1	TRINITY_DN17360_c0_g1_i1.p1	TRINITY_DN5001_c0_g1_i45.p3	TRINITY_DN253_c0_g1_i7.p1	TRINITY_DN31324_c0_g1_i1.p1	TRINITY_DN35_c0_g1_i18.p1	TRINITY_DN3994_c0_g1_i1.p1	TRINITY_DN1046_c0_g1_i1.p3	TRINITY_DN3818_c0_g1_i1.p1	TRINITY_DN1785_c0_g2_i2.p1	TRINITY_DN428_c0_g1_i17.p1	TRINITY_DN26587_c0_g1_i1.p1	TRINITY_DN8451_c0_g1_i12.p3	TRINITY_DN1647_c0_g1_i2.p4	TRINITY_DN8518_c0_g1_i1.p1	TRINITY_DN23787_c0_g1_i1.p1	TRINITY_DN80806_c0_g1_i1.p1	TRINITY_DN11264_c3_g1_i1.p1
156824at6656	TRUE	38	95	FBpp0076238	TRINITY_DN5816_c0_g1_i1.p1	TRINITY_DN7787_c0_g2_i1.p1	TRINITY_DN52090_c0_g2_i1.p1	c122308_g1_i1.p1	SMAR007385-PA	TRINITY_DN23258_c0_g1_i1.p1		TRINITY_DN14316_c0_g1_i1.p2	TRINITY_DN1545_c0_g1_i1.p1	TRINITY_DN4678_c0_g1_i1.p1	TRINITY_DN27857_c0_g1_i1.p1	TRINITY_DN1974_c0_g1_i1.p1	TRINITY_DN31919_c0_g1_i1.p1	TRINITY_DN6514_c1_g2_i1.p1	TRINITY_DN20558_c0_g1_i1.p1	TRINITY_DN17944_c0_g1_i1.p1	TRINITY_DN67810_c0_g1_i1.p1	TRINITY_DN66641_c0_g1_i1.p1	TRINITY_DN37444_c0_g1_i1.p1		TRINITY_DN10947_c0_g1_i1.p1	TRINITY_DN9411_c0_g1_i1.p1	TRINITY_DN3372_c0_g1_i1.p1	TRINITY_DN9585_c0_g1_i1.p1	TRINITY_DN5919_c0_g1_i3.p1	TRINITY_DN61697_c0_g1_i1.p1	TRINITY_DN3239_c0_g1_i5.p2	TRINITY_DN12347_c0_g1_i2.p1	TRINITY_DN18647_c0_g1_i2.p1	TRINITY_DN7740_c0_g1_i2.p1	TRINITY_DN3281_c0_g1_i1.p1	TRINITY_DN2578_c0_g1_i1.p1	TRINITY_DN18712_c0_g1_i1.p1	TRINITY_DN11586_c1_g1_i2.p1	TRINITY_DN10333_c0_g1_i1.p1	TRINITY_DN21783_c0_g1_i1.p1	TRINITY_DN27798_c0_g1_i2.p1	TRINITY_DN91066_c2_g1_i1.p1	TRINITY_DN16340_c0_g1_i1.p1
19104at6656	TRUE	38	95	FBpp0078765	TRINITY_DN15704_c0_g1_i1.p1	TRINITY_DN28846_c0_g1_i1.p1	TRINITY_DN49043_c1_g1_i3.p1	c98482_g1_i1.p1	SMAR003126-PA	TRINITY_DN26650_c0_g1_i3.p1	TRINITY_DN38125_c0_g1_i1.p1	TRINITY_DN31061_c0_g1_i1.p1	TRINITY_DN8398_c0_g1_i2.p1	TRINITY_DN21912_c0_g1_i1.p1	TRINITY_DN7418_c0_g1_i1.p1	TRINITY_DN12658_c0_g1_i1.p1	TRINITY_DN2735_c0_g1_i2.p1	TRINITY_DN7167_c0_g2_i1.p1		TRINITY_DN32273_c1_g1_i5.p1	TRINITY_DN73743_c1_g4_i1.p1	TRINITY_DN87675_c1_g1_i1.p1	TRINITY_DN40500_c0_g2_i1.p1		TRINITY_DN32859_c0_g1_i2.p1	TRINITY_DN47524_c0_g1_i2.p1	TRINITY_DN395_c0_g2_i2.p1	TRINITY_DN39745_c0_g1_i1.p1	TRINITY_DN7382_c0_g1_i1.p1	TRINITY_DN4346_c0_g1_i3.p1	TRINITY_DN3036_c0_g1_i5.p1	TRINITY_DN10572_c0_g1_i1.p1	TRINITY_DN7311_c0_g1_i2.p1	TRINITY_DN9444_c0_g1_i2.p1	TRINITY_DN631_c0_g1_i1.p1	TRINITY_DN18983_c0_g1_i3.p1	TRINITY_DN6329_c0_g1_i2.p1	TRINITY_DN4829_c0_g1_i1.p1	TRINITY_DN13621_c0_g1_i1.p1	TRINITY_DN25508_c0_g1_i1.p1	TRINITY_DN28388_c2_g6_i8.p1	TRINITY_DN90819_c12_g1_i2.p1	TRINITY_DN13290_c19_g1_i1.p1
46960at6656	TRUE	38	95	FBpp0073058	TRINITY_DN16410_c0_g1_i1.p1	TRINITY_DN29491_c0_g2_i1.p2	TRINITY_DN41021_c0_g1_i1.p1	c58658_g1_i1.p1	SMAR003664-PA	TRINITY_DN23529_c0_g3_i1.p1	TRINITY_DN19722_c0_g1_i1.p1	TRINITY_DN699_c0_g1_i2.p1	TRINITY_DN26156_c0_g1_i1.p1	TRINITY_DN3513_c0_g1_i1.p1	TRINITY_DN6313_c0_g1_i1.p1	TRINITY_DN3809_c0_g1_i1.p1	TRINITY_DN51452_c0_g1_i1.p1	TRINITY_DN16408_c0_g1_i1.p1	TRINITY_DN33003_c0_g2_i1.p2	TRINITY_DN33923_c1_g1_i4.p2	TRINITY_DN67162_c1_g1_i1.p1	TRINITY_DN71527_c0_g2_i2.p1	TRINITY_DN84086_c0_g1_i1.p1		TRINITY_DN1214_c0_g6_i1.p1	TRINITY_DN2527_c0_g1_i1.p1	TRINITY_DN3323_c1_g1_i1.p1	TRINITY_DN35100_c0_g1_i3.p1	TRINITY_DN73671_c0_g1_i1.p1	TRINITY_DN60545_c0_g1_i1.p1	TRINITY_DN1795_c0_g1_i7.p2	TRINITY_DN10633_c0_g1_i16.p1	TRINITY_DN1921_c0_g1_i42.p2	TRINITY_DN13034_c0_g1_i1.p1	TRINITY_DN505_c0_g1_i2.p2	TRINITY_DN5475_c0_g1_i3.p1	TRINITY_DN15552_c0_g1_i1.p1	TRINITY_DN4312_c0_g1_i2.p1	TRINITY_DN3770_c0_g1_i4.p1		TRINITY_DN25186_c0_g1_i4.p1	TRINITY_DN85000_c0_g1_i1.p1	TRINITY_DN2276_c0_g1_i1.p1
52828at6656	TRUE	38	95	FBpp0080257	TRINITY_DN11531_c0_g1_i1.p1	TRINITY_DN31612_c0_g1_i1.p1	TRINITY_DN37844_c0_g1_i1.p1	c97100_g1_i6.p1	SMAR006437-PA	TRINITY_DN19639_c0_g1_i3.p1	TRINITY_DN42961_c0_g1_i1.p1	TRINITY_DN5303_c0_g1_i1.p1	TRINITY_DN19005_c0_g1_i2.p1	TRINITY_DN1638_c0_g1_i2.p1	TRINITY_DN23650_c0_g1_i1.p1	TRINITY_DN7630_c0_g1_i1.p1	TRINITY_DN52801_c0_g1_i1.p1	TRINITY_DN21833_c0_g1_i1.p1	TRINITY_DN24421_c0_g2_i1.p1	TRINITY_DN32323_c0_g1_i1.p1	TRINITY_DN66117_c0_g1_i1.p1	TRINITY_DN43702_c0_g1_i1.p1			TRINITY_DN10651_c0_g2_i1.p1	TRINITY_DN41749_c0_g1_i1.p1	TRINITY_DN961_c0_g1_i1.p1	TRINITY_DN3290_c0_g1_i10.p1	TRINITY_DN44761_c0_g1_i1.p1	TRINITY_DN10773_c0_g1_i1.p1	TRINITY_DN1776_c0_g1_i3.p1	TRINITY_DN5859_c0_g1_i1.p1	TRINITY_DN2594_c0_g1_i2.p1	TRINITY_DN6587_c0_g1_i1.p2	TRINITY_DN1032_c0_g1_i4.p2	TRINITY_DN4722_c0_g1_i2.p1	TRINITY_DN178_c0_g4_i1.p1	TRINITY_DN4557_c0_g1_i2.p1	TRINITY_DN7413_c0_g1_i1.p1	TRINITY_DN33136_c0_g1_i1.p1	TRINITY_DN21774_c0_g2_i1.p1	TRINITY_DN87943_c0_g1_i1.p1	TRINITY_DN4866_c0_g1_i1.p1
58119at6656	TRUE	38	95	FBpp0085902	TRINITY_DN11604_c0_g1_i1.p1	TRINITY_DN34096_c2_g1_i2.p2	TRINITY_DN51548_c0_g1_i1.p1	c118205_g1_i1.p1	SMAR002869-PA	TRINITY_DN26114_c0_g2_i1.p1	TRINITY_DN23282_c0_g2_i1.p1	TRINITY_DN3397_c0_g1_i2.p1	TRINITY_DN688_c0_g1_i1.p1	TRINITY_DN11683_c0_g1_i2.p1	TRINITY_DN16884_c0_g1_i1.p1	TRINITY_DN3506_c0_g1_i1.p1	TRINITY_DN2248_c0_g1_i1.p1	TRINITY_DN10391_c0_g1_i1.p1	TRINITY_DN16905_c0_g1_i1.p1	TRINITY_DN16316_c0_g1_i1.p1	TRINITY_DN69368_c0_g1_i1.p1	TRINITY_DN81863_c0_g1_i1.p1		TRINITY_DN78231_c0_g1_i1.p1	TRINITY_DN41996_c0_g1_i1.p1	TRINITY_DN45470_c0_g1_i1.p1	TRINITY_DN24584_c0_g1_i1.p1	TRINITY_DN1657_c0_g1_i1.p1		TRINITY_DN60685_c0_g1_i1.p1	TRINITY_DN10467_c0_g1_i1.p1	TRINITY_DN2732_c0_g1_i5.p1	TRINITY_DN6957_c0_g1_i1.p1	TRINITY_DN23531_c0_g1_i1.p1	TRINITY_DN9673_c0_g1_i2.p1	TRINITY_DN2909_c0_g1_i4.p1	TRINITY_DN23079_c0_g1_i1.p1	TRINITY_DN6927_c0_g1_i2.p1	TRINITY_DN1003_c0_g1_i2.p1	TRINITY_DN23989_c0_g1_i1.p1	TRINITY_DN30806_c1_g1_i1.p1	TRINITY_DN92253_c18_g8_i1.p1	TRINITY_DN12102_c0_g1_i1.p1
6715at6656	TRUE	38	95	FBpp0079643	TRINITY_DN14606_c0_g1_i1.p1	TRINITY_DN32845_c0_g2_i1.p1	TRINITY_DN51628_c0_g2_i1.p1	c98374_g1_i2.p1	SMAR013462-PA	TRINITY_DN26829_c0_g3_i1.p1	TRINITY_DN29004_c0_g1_i1.p1	TRINITY_DN1297_c0_g1_i2.p1	TRINITY_DN7788_c0_g1_i2.p1	TRINITY_DN13022_c0_g1_i1.p1	TRINITY_DN7204_c1_g1_i1.p1	TRINITY_DN23100_c0_g1_i1.p1	TRINITY_DN34610_c0_g1_i1.p1	TRINITY_DN4546_c0_g1_i1.p1	TRINITY_DN31262_c0_g1_i2.p1	TRINITY_DN29343_c0_g1_i1.p1	TRINITY_DN73370_c1_g1_i1.p1	TRINITY_DN87841_c0_g1_i1.p1		TRINITY_DN20050_c0_g1_i1.p1	TRINITY_DN3226_c2_g1_i1.p1		TRINITY_DN7433_c1_g1_i1.p1	TRINITY_DN809_c0_g1_i1.p1	TRINITY_DN85173_c0_g1_i1.p1	TRINITY_DN13092_c0_g2_i1.p1	TRINITY_DN6962_c0_g1_i12.p1	TRINITY_DN3870_c0_g1_i1.p1	TRINITY_DN4753_c0_g1_i1.p1	TRINITY_DN15251_c0_g1_i1.p1	TRINITY_DN9864_c0_g3_i1.p1	TRINITY_DN1047_c1_g1_i1.p1	TRINITY_DN345_c0_g1_i4.p1	TRINITY_DN3888_c0_g1_i6.p1	TRINITY_DN9247_c0_g1_i1.p1	TRINITY_DN22002_c0_g1_i1.p1	TRINITY_DN31868_c0_g1_i1.p1	TRINITY_DN89638_c1_g1_i3.p1	TRINITY_DN11478_c1_g1_i1.p1
78758at6656	TRUE	38	95	FBpp0079578	TRINITY_DN18386_c0_g2_i1.p1	TRINITY_DN33031_c0_g1_i1.p1	TRINITY_DN50278_c0_g1_i3.p1	c71334_g1_i1.p1	SMAR014616-PA	TRINITY_DN26826_c0_g2_i1.p1	TRINITY_DN87120_c0_g1_i1.p1	TRINITY_DN475_c0_g1_i1.p1	TRINITY_DN22650_c0_g1_i1.p1	TRINITY_DN12197_c0_g1_i1.p1	TRINITY_DN17307_c0_g1_i1.p1	TRINITY_DN2608_c0_g1_i4.p1		TRINITY_DN6095_c0_g1_i1.p1	TRINITY_DN28613_c0_g2_i1.p1	TRINITY_DN55503_c0_g1_i1.p1	TRINITY_DN55692_c0_g2_i1.p1	TRINITY_DN85235_c2_g2_i3.p1	TRINITY_DN11096_c0_g1_i1.p1		TRINITY_DN10657_c0_g2_i1.p1	TRINITY_DN18119_c0_g1_i1.p1	TRINITY_DN451_c0_g1_i1.p1	TRINITY_DN2986_c0_g1_i5.p1	TRINITY_DN55869_c0_g1_i1.p1	TRINITY_DN9298_c0_g2_i3.p1	TRINITY_DN3195_c0_g1_i3.p1	TRINITY_DN3535_c0_g1_i1.p1	TRINITY_DN5745_c0_g1_i9.p1	TRINITY_DN23848_c0_g1_i1.p1	TRINITY_DN28105_c0_g1_i1.p1	TRINITY_DN1926_c0_g1_i9.p1	TRINITY_DN4216_c0_g1_i3.p1	TRINITY_DN4096_c0_g1_i1.p1	TRINITY_DN7412_c0_g1_i2.p1	TRINITY_DN25725_c1_g2_i1.p1	TRINITY_DN31306_c0_g1_i5.p1	TRINITY_DN20985_c0_g1_i1.p1	TRINITY_DN15482_c0_g1_i1.p1
83376at6656	TRUE	38	95	FBpp0080918	TRINITY_DN15594_c0_g2_i1.p1	TRINITY_DN30397_c0_g1_i1.p1	TRINITY_DN49103_c0_g1_i1.p1	c96358_g3_i3.p1	SMAR010560-PA	TRINITY_DN26554_c0_g1_i1.p1	TRINITY_DN31500_c1_g1_i1.p1	TRINITY_DN36934_c0_g1_i2.p1	TRINITY_DN5842_c0_g1_i3.p1	TRINITY_DN16506_c0_g1_i1.p2	TRINITY_DN32179_c0_g1_i1.p1	TRINITY_DN3868_c0_g1_i1.p1	TRINITY_DN1456_c0_g1_i1.p1	TRINITY_DN30904_c0_g1_i1.p1	TRINITY_DN53954_c0_g1_i1.p1	TRINITY_DN32212_c1_g1_i1.p1	TRINITY_DN117326_c0_g1_i1.p1	TRINITY_DN79905_c0_g1_i1.p1			TRINITY_DN27600_c0_g3_i1.p1	TRINITY_DN6154_c0_g1_i1.p1	TRINITY_DN7270_c0_g1_i2.p1	TRINITY_DN40268_c0_g1_i1.p1	TRINITY_DN50926_c0_g1_i1.p1	TRINITY_DN20613_c0_g1_i1.p1	TRINITY_DN3519_c0_g1_i11.p1	TRINITY_DN9581_c0_g1_i1.p1	TRINITY_DN1416_c1_g1_i4.p1	TRINITY_DN6214_c0_g1_i1.p1	TRINITY_DN10601_c0_g1_i2.p1	TRINITY_DN1160_c0_g1_i15.p1	TRINITY_DN8133_c0_g1_i4.p2	TRINITY_DN24490_c0_g1_i1.p1	TRINITY_DN3168_c0_g1_i1.p2	TRINITY_DN21474_c0_g1_i1.p1	TRINITY_DN29635_c0_g1_i3.p1	TRINITY_DN61288_c0_g2_i1.p1	TRINITY_DN10005_c2_g1_i1.p1
88711at6656	TRUE	38	95	FBpp0077979	TRINITY_DN3446_c0_g1_i1.p1	TRINITY_DN20855_c0_g2_i1.p1	TRINITY_DN48468_c0_g1_i1.p1	c89492_g2_i1.p1	SMAR015409-PA	TRINITY_DN26467_c0_g1_i2.p1	TRINITY_DN30677_c0_g1_i1.p1	TRINITY_DN3724_c0_g1_i1.p1	TRINITY_DN1378_c0_g1_i5.p1	TRINITY_DN10637_c0_g1_i1.p1	TRINITY_DN2509_c0_g1_i1.p1	TRINITY_DN1757_c0_g2_i1.p1	TRINITY_DN1530_c0_g1_i1.p1	TRINITY_DN2074_c0_g1_i1.p1	TRINITY_DN84574_c0_g1_i1.p1	TRINITY_DN24656_c0_g1_i1.p1	TRINITY_DN67201_c0_g1_i1.p1	TRINITY_DN76432_c0_g1_i5.p1			TRINITY_DN1211_c0_g1_i6.p1	TRINITY_DN1290_c0_g1_i1.p1	TRINITY_DN2015_c0_g1_i1.p1	TRINITY_DN3209_c0_g1_i2.p1	TRINITY_DN5486_c0_g1_i1.p1	TRINITY_DN60938_c0_g1_i2.p1	TRINITY_DN12917_c0_g1_i2.p1	TRINITY_DN394_c0_g1_i1.p1	TRINITY_DN28625_c0_g1_i2.p1	TRINITY_DN5059_c0_g1_i2.p1	TRINITY_DN3304_c0_g1_i2.p1	TRINITY_DN2233_c0_g2_i10.p1	TRINITY_DN4873_c0_g1_i1.p1	TRINITY_DN2249_c0_g1_i53.p1	TRINITY_DN5196_c0_g1_i1.p1	TRINITY_DN23052_c0_g1_i1.p1	TRINITY_DN23627_c0_g2_i3.p1	TRINITY_DN90280_c3_g2_i1.p1	TRINITY_DN14868_c0_g1_i1.p1
94476at6656	TRUE	38	95	FBpp0110523	TRINITY_DN12881_c0_g1_i1.p1	TRINITY_DN28689_c0_g1_i1.p1	TRINITY_DN53260_c0_g1_i1.p1	c85004_g1_i1.p1	SMAR012192-PA	TRINITY_DN17493_c0_g2_i1.p1	TRINITY_DN39388_c1_g1_i1.p1	TRINITY_DN5417_c0_g1_i2.p1	TRINITY_DN4297_c0_g1_i6.p1	TRINITY_DN22645_c0_g1_i1.p1	TRINITY_DN21963_c0_g1_i1.p1	TRINITY_DN2504_c0_g1_i4.p1	TRINITY_DN4403_c0_g1_i2.p1	TRINITY_DN4703_c0_g1_i2.p1	TRINITY_DN7932_c0_g1_i1.p1	TRINITY_DN2393_c0_g2_i2.p1		TRINITY_DN65000_c0_g1_i1.p1		TRINITY_DN64455_c0_g1_i1.p1	TRINITY_DN3651_c0_g1_i1.p1	TRINITY_DN33491_c0_g1_i1.p1	TRINITY_DN3235_c0_g1_i2.p1	TRINITY_DN8025_c0_g1_i3.p1	TRINITY_DN85915_c0_g1_i1.p1	TRINITY_DN7018_c0_g1_i1.p1	TRINITY_DN4885_c0_g1_i1.p1	TRINITY_DN7928_c0_g1_i2.p1	TRINITY_DN872_c0_g1_i41.p1	TRINITY_DN14426_c0_g1_i1.p1	TRINITY_DN32016_c0_g1_i1.p1	TRINITY_DN5179_c0_g1_i5.p1	TRINITY_DN22855_c0_g1_i1.p1	TRINITY_DN4840_c0_g1_i1.p1	TRINITY_DN1869_c0_g2_i1.p1	TRINITY_DN42946_c0_g1_i1.p1	TRINITY_DN24873_c0_g1_i5.p1	TRINITY_DN101422_c0_g1_i1.p1	TRINITY_DN2449_c0_g1_i1.p1
94842at6656	TRUE	38	95	FBpp0080121	TRINITY_DN5591_c0_g2_i1.p1	TRINITY_DN32660_c0_g1_i4.p2	TRINITY_DN49212_c0_g3_i1.p2	c184986_g1_i1.p1	SMAR007707-PA	TRINITY_DN19961_c0_g1_i1.p1	TRINITY_DN44978_c0_g1_i1.p1	TRINITY_DN931_c0_g1_i9.p1	TRINITY_DN1305_c0_g1_i2.p1	TRINITY_DN5410_c0_g1_i1.p1	TRINITY_DN5590_c0_g1_i1.p1	TRINITY_DN1741_c0_g1_i5.p1		TRINITY_DN13669_c0_g1_i1.p1	TRINITY_DN76558_c0_g1_i1.p1	TRINITY_DN28199_c0_g1_i2.p1	TRINITY_DN64118_c1_g1_i1.p1	TRINITY_DN27921_c0_g1_i1.p1	TRINITY_DN54550_c0_g1_i1.p1		TRINITY_DN4637_c0_g1_i2.p1	TRINITY_DN45586_c0_g1_i1.p1	TRINITY_DN22581_c0_g1_i1.p1	TRINITY_DN991_c2_g1_i4.p1	TRINITY_DN71932_c0_g1_i1.p1	TRINITY_DN6577_c0_g1_i1.p1	TRINITY_DN9301_c1_g1_i2.p1	TRINITY_DN5836_c0_g1_i19.p2	TRINITY_DN7169_c0_g1_i12.p2	TRINITY_DN27394_c0_g1_i2.p1	TRINITY_DN2102_c0_g1_i1.p2	TRINITY_DN14435_c0_g1_i2.p1	TRINITY_DN1693_c0_g1_i1.p1	TRINITY_DN1354_c0_g1_i11.p1	TRINITY_DN23837_c0_g1_i1.p1	TRINITY_DN23457_c0_g3_i1.p1	TRINITY_DN40462_c0_g1_i1.p1	TRINITY_DN49721_c0_g1_i1.p1	TRINITY_DN8775_c0_g1_i1.p1
19058at6656	FALSE	37	92.5	FBpp0074555	TRINITY_DN12057_c0_g1_i1.p1	TRINITY_DN29309_c0_g2_i3.p1	TRINITY_DN50271_c0_g1_i1.p1	c96412_g1_i4.p1	SMAR006654-PA	TRINITY_DN24186_c0_g1_i1.p1	TRINITY_DN42085_c0_g1_i3.p1	TRINITY_DN4197_c0_g1_i2.p1	TRINITY_DN6_c0_g1_i1.p1	TRINITY_DN11166_c0_g1_i1.p1	TRINITY_DN32125_c0_g1_i1.p1	TRINITY_DN6700_c0_g1_i1.p1		TRINITY_DN13360_c0_g1_i1.p1	TRINITY_DN14508_c0_g1_i1.p1	TRINITY_DN21974_c0_g1_i1.p1	TRINITY_DN70335_c0_g1_i1.p1	TRINITY_DN85399_c2_g1_i1.p1			TRINITY_DN12983_c0_g2_i1.p1	TRINITY_DN1858_c0_g1_i2.p1	TRINITY_DN2888_c0_g1_i1.p1	TRINITY_DN3287_c0_g1_i2.p1	TRINITY_DN73361_c0_g1_i1.p1	TRINITY_DN5524_c0_g1_i5.p1	TRINITY_DN4141_c0_g1_i7.p1	TRINITY_DN24853_c0_g1_i2.p1	TRINITY_DN2757_c0_g1_i1.p1	TRINITY_DN5093_c0_g1_i14.p1	TRINITY_DN27630_c0_g1_i1.p1	TRINITY_DN3663_c0_g1_i4.p1	TRINITY_DN2047_c0_g1_i2.p1	TRINITY_DN15407_c0_g1_i1.p1	TRINITY_DN3797_c0_g2_i1.p1	TRINITY_DN25011_c0_g3_i4.p1	TRINITY_DN30124_c0_g1_i2.p1	TRINITY_DN83249_c0_g1_i1.p1	TRINITY_DN11356_c0_g1_i1.p1
99625at6656	TRUE	38	95	FBpp0077694	TRINITY_DN40884_c0_g1_i1.p1	TRINITY_DN7669_c0_g1_i1.p1	TRINITY_DN49164_c0_g2_i1.p1	c61236_g1_i2.p1	SMAR002370-PA	TRINITY_DN21523_c0_g1_i2.p1	TRINITY_DN53545_c0_g1_i1.p1	TRINITY_DN9447_c0_g1_i1.p1	TRINITY_DN18969_c0_g1_i2.p1	TRINITY_DN5012_c0_g1_i1.p1	TRINITY_DN6334_c0_g1_i2.p1	TRINITY_DN9450_c0_g1_i1.p1		TRINITY_DN26336_c0_g1_i1.p1		TRINITY_DN15959_c0_g1_i1.p1	TRINITY_DN64291_c0_g1_i1.p1	TRINITY_DN65418_c0_g1_i1.p1	TRINITY_DN89830_c0_g1_i1.p1	TRINITY_DN83934_c0_g1_i1.p1	TRINITY_DN11349_c1_g1_i1.p1	TRINITY_DN11567_c0_g1_i3.p1	TRINITY_DN3756_c0_g1_i1.p1	TRINITY_DN3972_c0_g1_i1.p1	TRINITY_DN52968_c0_g1_i3.p1	TRINITY_DN7697_c0_g1_i3.p1	TRINITY_DN4233_c0_g1_i2.p1	TRINITY_DN4535_c0_g1_i1.p1	TRINITY_DN2574_c4_g1_i1.p1	TRINITY_DN14585_c0_g1_i6.p1	TRINITY_DN5625_c0_g1_i1.p1	TRINITY_DN5496_c0_g1_i9.p1	TRINITY_DN4896_c0_g1_i2.p1	TRINITY_DN991_c0_g1_i1.p1	TRINITY_DN22761_c0_g1_i1.p1	TRINITY_DN24036_c0_g3_i1.p1	TRINITY_DN29886_c0_g2_i14.p1	TRINITY_DN91142_c19_g8_i2.p1	TRINITY_DN10845_c0_g1_i1.p1
103914at6656	TRUE	38	95	FBpp0070305	TRINITY_DN7855_c0_g1_i1.p1	TRINITY_DN27668_c0_g1_i1.p1	TRINITY_DN50040_c1_g2_i1.p2	c84569_g1_i7.p1		TRINITY_DN24087_c0_g1_i2.p1	TRINITY_DN22071_c0_g1_i1.p1	TRINITY_DN6506_c0_g1_i1.p1	TRINITY_DN27230_c0_g1_i1.p1	TRINITY_DN7891_c0_g1_i1.p1	TRINITY_DN21018_c0_g1_i1.p1	TRINITY_DN29574_c0_g1_i2.p1	TRINITY_DN31196_c0_g1_i1.p1	TRINITY_DN26859_c0_g1_i1.p1	TRINITY_DN21362_c0_g1_i1.p1	TRINITY_DN32762_c5_g3_i1.p1	TRINITY_DN47697_c0_g2_i1.p1	TRINITY_DN87210_c0_g1_i1.p1	TRINITY_DN44582_c0_g2_i1.p1	TRINITY_DN80868_c0_g1_i1.p1	TRINITY_DN12593_c0_g2_i1.p1		TRINITY_DN13108_c0_g2_i1.p1	TRINITY_DN39675_c0_g1_i1.p1	TRINITY_DN13862_c0_g1_i2.p1	TRINITY_DN8393_c0_g1_i1.p1	TRINITY_DN2058_c0_g1_i4.p2	TRINITY_DN8918_c0_g1_i1.p1	TRINITY_DN81_c0_g1_i19.p1	TRINITY_DN19377_c0_g1_i1.p1	TRINITY_DN15522_c0_g1_i1.p1	TRINITY_DN5441_c0_g1_i17.p1	TRINITY_DN2269_c0_g1_i119.p1	TRINITY_DN6544_c0_g1_i1.p1	TRINITY_DN26463_c0_g1_i1.p1	TRINITY_DN17307_c0_g2_i1.p1	TRINITY_DN29782_c0_g1_i1.p1	TRINITY_DN91467_c5_g4_i1.p1	TRINITY_DN276_c0_g1_i1.p1
113015at6656	TRUE	38	95	FBpp0071023	TRINITY_DN16745_c0_g1_i2.p1	TRINITY_DN21540_c0_g1_i1.p1	TRINITY_DN49954_c0_g4_i1.p1	c71259_g1_i1.p2	SMAR014888-PA	TRINITY_DN20714_c0_g2_i1.p1	TRINITY_DN26664_c0_g1_i1.p1	TRINITY_DN4466_c0_g1_i4.p2	TRINITY_DN7320_c0_g2_i2.p1	TRINITY_DN8730_c0_g1_i1.p1	TRINITY_DN23080_c0_g1_i1.p1	TRINITY_DN1141_c0_g1_i6.p2	TRINITY_DN4410_c0_g1_i2.p1	TRINITY_DN2048_c0_g1_i1.p1	TRINITY_DN31577_c2_g1_i1.p1	TRINITY_DN32469_c1_g2_i2.p1	TRINITY_DN63590_c0_g1_i1.p1	TRINITY_DN59182_c0_g1_i1.p1			TRINITY_DN22078_c0_g1_i1.p1	TRINITY_DN45795_c0_g1_i1.p1	TRINITY_DN1538_c0_g2_i2.p2	TRINITY_DN1230_c0_g1_i2.p2	TRINITY_DN73379_c0_g1_i2.p1	TRINITY_DN6273_c0_g1_i4.p2	TRINITY_DN5983_c0_g1_i4.p2	TRINITY_DN4990_c0_g1_i1.p1	TRINITY_DN19_c0_g1_i116.p3	TRINITY_DN501_c0_g1_i12.p2	TRINITY_DN21233_c0_g1_i1.p1	TRINITY_DN1344_c0_g1_i3.p1	TRINITY_DN2993_c0_g1_i1.p1	TRINITY_DN9219_c0_g1_i2.p1	TRINITY_DN8518_c0_g1_i1.p1	TRINITY_DN21520_c0_g2_i1.p1	TRINITY_DN15304_c0_g1_i2.p1	TRINITY_DN91443_c6_g3_i4.p1	TRINITY_DN6674_c0_g1_i1.p1
32851at6656	FALSE	39	97.5	FBpp0082510	TRINITY_DN34_c0_g2_i1.p1	TRINITY_DN20229_c0_g2_i1.p1	TRINITY_DN86237_c0_g1_i1.p1	c96184_g1_i2.p1	SMAR010323-PA	TRINITY_DN26509_c1_g2_i1.p1	TRINITY_DN39175_c0_g1_i1.p1	TRINITY_DN21343_c0_g1_i1.p1	TRINITY_DN4037_c0_g1_i3.p1	TRINITY_DN30494_c0_g1_i1.p1	TRINITY_DN3482_c0_g1_i1.p1	TRINITY_DN11822_c0_g1_i1.p1	TRINITY_DN48498_c0_g1_i1.p1	TRINITY_DN9260_c0_g1_i1.p1	TRINITY_DN15571_c0_g2_i1.p1	TRINITY_DN33135_c0_g1_i2.p1	TRINITY_DN61326_c0_g3_i1.p1	TRINITY_DN86130_c0_g1_i2.p1	TRINITY_DN39349_c0_g2_i1.p1		TRINITY_DN15801_c0_g2_i1.p1	TRINITY_DN46392_c0_g1_i1.p1	TRINITY_DN4847_c0_g1_i1.p1	TRINITY_DN8171_c0_g1_i2.p1	TRINITY_DN71985_c0_g1_i1.p1	TRINITY_DN3483_c0_g1_i1.p1	TRINITY_DN2585_c0_g1_i4.p1	TRINITY_DN3645_c0_g3_i3.p1	TRINITY_DN2518_c0_g1_i32.p1	TRINITY_DN1395_c0_g1_i2.p1	TRINITY_DN4843_c0_g1_i1.p1	TRINITY_DN92769_c0_g1_i1.p1	TRINITY_DN6294_c0_g1_i2.p1	TRINITY_DN1250_c0_g1_i3.p1	TRINITY_DN18858_c0_g1_i1.p1	TRINITY_DN2782_c0_g1_i1.p1	TRINITY_DN24962_c0_g1_i2.p1	TRINITY_DN78172_c0_g1_i2.p1	TRINITY_DN12280_c0_g3_i1.p1
40323at6656	FALSE	38	95	FBpp0302814	TRINITY_DN16962_c0_g1_i3.p1	TRINITY_DN29467_c0_g1_i1.p1	TRINITY_DN47511_c0_g1_i1.p1	c93146_g4_i3.p1	SMAR002570-PA	TRINITY_DN23417_c0_g1_i2.p1	TRINITY_DN37888_c0_g1_i1.p1	TRINITY_DN5531_c0_g1_i10.p1	TRINITY_DN2137_c0_g1_i11.p1	TRINITY_DN1226_c0_g4_i1.p1	TRINITY_DN7136_c0_g1_i4.p1	TRINITY_DN1756_c0_g1_i1.p1		TRINITY_DN9069_c0_g1_i1.p1	TRINITY_DN31184_c0_g1_i2.p1	TRINITY_DN32494_c2_g3_i2.p1	TRINITY_DN71884_c0_g2_i2.p1	TRINITY_DN87276_c0_g2_i1.p1		TRINITY_DN10591_c0_g1_i1.p1	TRINITY_DN4645_c1_g1_i1.p1	TRINITY_DN24647_c0_g1_i1.p1	TRINITY_DN1696_c0_g1_i2.p1	TRINITY_DN467_c0_g1_i3.p1	TRINITY_DN2042_c0_g1_i1.p1	TRINITY_DN2625_c0_g1_i6.p1	TRINITY_DN246_c0_g1_i2.p1	TRINITY_DN8978_c0_g1_i9.p1	TRINITY_DN5071_c1_g1_i9.p1	TRINITY_DN1962_c0_g1_i6.p1	TRINITY_DN33081_c0_g1_i6.p1	TRINITY_DN92301_c0_g1_i1.p1	TRINITY_DN7848_c0_g1_i9.p1	TRINITY_DN2162_c0_g1_i8.p1	TRINITY_DN1028_c0_g1_i4.p1	TRINITY_DN24728_c0_g1_i1.p1	TRINITY_DN29237_c0_g4_i1.p1	TRINITY_DN89886_c0_g2_i2.p1	TRINITY_DN11001_c0_g1_i1.p1
116688at6656	TRUE	38	95	FBpp0074386	TRINITY_DN501_c0_g1_i2.p1	TRINITY_DN26842_c0_g1_i1.p2	TRINITY_DN48020_c0_g1_i2.p2	c87398_g1_i3.p2	SMAR010339-PA	TRINITY_DN4959_c0_g1_i1.p1	TRINITY_DN39762_c0_g1_i1.p1	TRINITY_DN4835_c0_g1_i1.p1	TRINITY_DN728_c0_g1_i4.p2	TRINITY_DN7808_c0_g1_i2.p1	TRINITY_DN126_c1_g1_i1.p1	TRINITY_DN4128_c0_g1_i1.p1	TRINITY_DN15110_c0_g1_i1.p1	TRINITY_DN2615_c0_g1_i5.p1	TRINITY_DN26646_c0_g1_i1.p1	TRINITY_DN27329_c0_g1_i2.p2	TRINITY_DN65524_c0_g1_i1.p2	TRINITY_DN84308_c1_g3_i1.p1			TRINITY_DN793_c1_g1_i3.p1	TRINITY_DN6985_c0_g1_i2.p1	TRINITY_DN2472_c0_g1_i1.p1	TRINITY_DN3332_c0_g1_i2.p1	TRINITY_DN85709_c0_g1_i1.p1	TRINITY_DN21384_c0_g1_i1.p1	TRINITY_DN5023_c0_g1_i1.p1	TRINITY_DN14318_c0_g1_i5.p1	TRINITY_DN13935_c0_g1_i23.p2	TRINITY_DN1039_c0_g1_i4.p1	TRINITY_DN6105_c0_g1_i3.p2	TRINITY_DN3359_c0_g2_i2.p1	TRINITY_DN473_c0_g1_i1.p2	TRINITY_DN2409_c0_g1_i8.p2	TRINITY_DN1923_c0_g1_i1.p1	TRINITY_DN22462_c0_g1_i2.p1	TRINITY_DN27535_c0_g1_i1.p1	TRINITY_DN101532_c0_g1_i1.p1	TRINITY_DN2634_c0_g1_i1.p1
117947at6656	TRUE	38	95	FBpp0086206	TRINITY_DN16987_c0_g2_i1.p1	TRINITY_DN22325_c0_g1_i1.p1	TRINITY_DN44213_c0_g1_i1.p1	c61251_g1_i3.p1	SMAR003835-PA	TRINITY_DN19098_c0_g1_i1.p1	TRINITY_DN103535_c0_g1_i1.p1	TRINITY_DN6602_c1_g1_i2.p1	TRINITY_DN2160_c0_g1_i1.p1	TRINITY_DN9518_c0_g1_i1.p1	TRINITY_DN1921_c0_g1_i17.p1	TRINITY_DN3605_c0_g1_i1.p1	TRINITY_DN22416_c0_g1_i1.p1	TRINITY_DN31919_c0_g1_i1.p1		TRINITY_DN29940_c0_g4_i1.p1	TRINITY_DN71820_c0_g1_i3.p1	TRINITY_DN83949_c0_g1_i1.p1		TRINITY_DN34042_c0_g1_i1.p1	TRINITY_DN5744_c0_g1_i10.p1	TRINITY_DN2272_c0_g1_i5.p1	TRINITY_DN17307_c0_g1_i1.p1	TRINITY_DN16917_c0_g1_i1.p1	TRINITY_DN51388_c0_g1_i1.p1	TRINITY_DN40923_c0_g1_i1.p1	TRINITY_DN9254_c0_g1_i1.p1	TRINITY_DN4710_c0_g1_i1.p2	TRINITY_DN5979_c0_g1_i1.p1	TRINITY_DN32405_c0_g1_i1.p1	TRINITY_DN4835_c0_g1_i1.p1	TRINITY_DN7313_c0_g1_i1.p1	TRINITY_DN7997_c0_g2_i1.p1	TRINITY_DN7578_c0_g1_i2.p1	TRINITY_DN4957_c0_g1_i1.p1	TRINITY_DN2529_c0_g1_i1.p1	TRINITY_DN24745_c0_g1_i1.p1	TRINITY_DN72886_c0_g1_i2.p1	TRINITY_DN14996_c0_g1_i1.p1
42992at6656	FALSE	38	95	FBpp0085393	TRINITY_DN55237_c0_g1_i1.p1	TRINITY_DN28157_c0_g2_i1.p1	TRINITY_DN46823_c0_g1_i2.p1	c97800_g1_i1.p1	SMAR006753-PA	TRINITY_DN23554_c0_g2_i3.p1	TRINITY_DN24610_c0_g1_i1.p1	TRINITY_DN42881_c0_g1_i1.p1	TRINITY_DN1483_c0_g4_i1.p1	TRINITY_DN7184_c0_g1_i1.p1	TRINITY_DN13457_c0_g1_i1.p1	TRINITY_DN12414_c0_g1_i1.p1	TRINITY_DN3929_c0_g1_i2.p1	TRINITY_DN5925_c0_g1_i2.p1	TRINITY_DN23505_c0_g1_i1.p2	TRINITY_DN33096_c1_g1_i6.p1	TRINITY_DN72887_c0_g1_i2.p1	TRINITY_DN71928_c2_g1_i1.p1			TRINITY_DN22418_c0_g1_i1.p1	TRINITY_DN26077_c0_g1_i1.p1	TRINITY_DN5811_c0_g1_i2.p1	TRINITY_DN15840_c0_g1_i1.p1	TRINITY_DN28212_c0_g1_i2.p1	TRINITY_DN63831_c0_g1_i1.p1	TRINITY_DN2399_c0_g1_i3.p2	TRINITY_DN11151_c0_g1_i1.p1	TRINITY_DN1988_c0_g1_i30.p2	TRINITY_DN7772_c0_g1_i2.p1	TRINITY_DN27374_c0_g1_i2.p1	TRINITY_DN19526_c0_g1_i1.p1	TRINITY_DN8344_c0_g1_i4.p1	TRINITY_DN1145_c0_g1_i1.p1	TRINITY_DN27239_c0_g1_i1.p1	TRINITY_DN23487_c0_g2_i1.p1	TRINITY_DN31409_c0_g1_i1.p1	TRINITY_DN92476_c2_g1_i2.p1	TRINITY_DN8007_c0_g1_i1.p1
130363at6656	TRUE	38	95	FBpp0081384	TRINITY_DN39415_c0_g1_i1.p1	TRINITY_DN4970_c0_g1_i1.p1	TRINITY_DN51203_c0_g1_i1.p1	c78640_g1_i1.p1	SMAR006120-PA	TRINITY_DN18055_c0_g3_i1.p1	TRINITY_DN112268_c0_g1_i1.p1	TRINITY_DN12958_c0_g1_i1.p1	TRINITY_DN6646_c0_g1_i4.p1	TRINITY_DN140_c0_g1_i3.p1	TRINITY_DN3575_c0_g1_i3.p1	TRINITY_DN40204_c0_g1_i1.p1	TRINITY_DN53958_c0_g1_i1.p1	TRINITY_DN21684_c0_g1_i1.p1	TRINITY_DN6557_c0_g1_i1.p1	TRINITY_DN28526_c0_g1_i3.p1	TRINITY_DN54608_c0_g1_i1.p1	TRINITY_DN64006_c0_g2_i1.p1	TRINITY_DN5331_c0_g2_i1.p1		TRINITY_DN6002_c6_g1_i1.p1		TRINITY_DN4785_c0_g1_i2.p1	TRINITY_DN30049_c0_g1_i2.p1	TRINITY_DN5761_c0_g1_i2.p1	TRINITY_DN11599_c0_g1_i1.p1	TRINITY_DN9118_c0_g1_i1.p1	TRINITY_DN19386_c0_g1_i2.p1	TRINITY_DN543_c1_g1_i2.p1	TRINITY_DN2321_c0_g1_i3.p2	TRINITY_DN1993_c0_g1_i1.p1	TRINITY_DN950_c0_g1_i2.p1	TRINITY_DN263_c0_g1_i1.p1	TRINITY_DN10416_c0_g2_i1.p1	TRINITY_DN2611_c0_g1_i1.p1	TRINITY_DN46244_c0_g1_i1.p1	TRINITY_DN22756_c0_g1_i1.p1	TRINITY_DN29810_c0_g1_i1.p1	TRINITY_DN2947_c0_g1_i1.p1
46679at6656	FALSE	37	92.5	FBpp0081580	TRINITY_DN17766_c0_g3_i1.p1	TRINITY_DN22479_c0_g3_i1.p1	TRINITY_DN53032_c6_g20_i4.p1	c99326_g1_i2.p1	SMAR003238-PA	TRINITY_DN25412_c0_g1_i1.p1	TRINITY_DN40720_c0_g3_i1.p1	TRINITY_DN7219_c1_g1_i3.p1	TRINITY_DN4044_c0_g1_i1.p1	TRINITY_DN30472_c0_g1_i1.p1	TRINITY_DN12309_c0_g1_i1.p1	TRINITY_DN8194_c0_g1_i2.p1		TRINITY_DN6717_c0_g1_i1.p1	TRINITY_DN30516_c0_g1_i1.p1	TRINITY_DN24131_c0_g2_i1.p1	TRINITY_DN72734_c0_g1_i1.p1	TRINITY_DN86136_c4_g3_i8.p1			TRINITY_DN7364_c0_g1_i1.p1	TRINITY_DN16777_c0_g1_i1.p1	TRINITY_DN563_c0_g1_i1.p1	TRINITY_DN914_c0_g2_i1.p1	TRINITY_DN66744_c0_g1_i1.p1	TRINITY_DN33377_c0_g1_i1.p2	TRINITY_DN1412_c0_g1_i1.p1	TRINITY_DN9987_c0_g1_i1.p1	TRINITY_DN55_c2_g1_i1.p1	TRINITY_DN7421_c0_g2_i2.p1	TRINITY_DN2560_c0_g3_i1.p1	TRINITY_DN7892_c0_g1_i1.p1	TRINITY_DN23179_c0_g1_i1.p1	TRINITY_DN2154_c0_g1_i16.p2	TRINITY_DN18004_c0_g1_i1.p1	TRINITY_DN25179_c1_g2_i5.p1	TRINITY_DN30851_c1_g1_i5.p1	TRINITY_DN92167_c0_g1_i1.p1	TRINITY_DN5590_c0_g1_i1.p1
135357at6656	TRUE	38	95	FBpp0078731	TRINITY_DN7814_c0_g1_i1.p1	TRINITY_DN31802_c0_g1_i1.p2	TRINITY_DN39003_c0_g1_i1.p1	c82747_g1_i1.p1	SMAR012223-PA	TRINITY_DN21017_c0_g1_i1.p1	TRINITY_DN14583_c0_g1_i1.p1	TRINITY_DN31262_c0_g1_i1.p1	TRINITY_DN5679_c0_g1_i2.p2	TRINITY_DN26541_c0_g1_i1.p1	TRINITY_DN30384_c0_g1_i1.p1	TRINITY_DN21785_c0_g1_i1.p1	TRINITY_DN2031_c0_g1_i1.p1	TRINITY_DN2220_c0_g1_i4.p1		TRINITY_DN24387_c0_g1_i1.p1	TRINITY_DN72769_c0_g1_i1.p1	TRINITY_DN153960_c0_g1_i1.p1	TRINITY_DN82211_c0_g1_i1.p1		TRINITY_DN6471_c2_g1_i1.p1	TRINITY_DN4535_c0_g1_i1.p1	TRINITY_DN7124_c0_g1_i1.p2	TRINITY_DN2848_c0_g1_i1.p1	TRINITY_DN12954_c0_g1_i1.p1	TRINITY_DN43096_c0_g1_i1.p1	TRINITY_DN10723_c0_g1_i2.p1	TRINITY_DN10348_c0_g1_i10.p1	TRINITY_DN12546_c0_g1_i4.p1	TRINITY_DN19972_c0_g1_i1.p1	TRINITY_DN3001_c0_g1_i1.p1	TRINITY_DN6261_c0_g1_i1.p1	TRINITY_DN597_c0_g1_i5.p1	TRINITY_DN2988_c0_g1_i3.p1	TRINITY_DN27043_c0_g1_i1.p1	TRINITY_DN19261_c0_g1_i2.p1	TRINITY_DN28922_c0_g3_i1.p1	TRINITY_DN79156_c0_g1_i2.p1	TRINITY_DN2564_c0_g2_i1.p1
135690at6656	TRUE	38	95	FBpp0290000	TRINITY_DN67007_c1_g1_i1.p1	TRINITY_DN56510_c0_g1_i1.p1	TRINITY_DN34833_c0_g1_i1.p1	c83677_g1_i1.p2	SMAR014925-PA	TRINITY_DN22849_c0_g1_i1.p1	TRINITY_DN36583_c0_g1_i1.p1	TRINITY_DN9120_c0_g1_i1.p1	TRINITY_DN552_c0_g1_i1.p1	TRINITY_DN6960_c0_g1_i1.p1	TRINITY_DN7383_c0_g1_i1.p2	TRINITY_DN31312_c0_g1_i1.p1		TRINITY_DN2311_c0_g1_i2.p1	TRINITY_DN31170_c1_g1_i1.p1	TRINITY_DN12907_c0_g1_i1.p1	TRINITY_DN65261_c0_g1_i1.p1	TRINITY_DN78513_c0_g3_i1.p1	TRINITY_DN38137_c0_g1_i1.p1	TRINITY_DN58194_c0_g1_i1.p1	TRINITY_DN7585_c2_g1_i2.p1	TRINITY_DN2998_c0_g2_i2.p1	TRINITY_DN2076_c0_g1_i1.p1	TRINITY_DN1025_c1_g1_i1.p3		TRINITY_DN8390_c0_g1_i3.p1	TRINITY_DN1704_c0_g1_i1.p1	TRINITY_DN571_c0_g1_i4.p1	TRINITY_DN3277_c0_g1_i2.p1	TRINITY_DN1658_c0_g1_i1.p1	TRINITY_DN1510_c0_g1_i3.p1	TRINITY_DN2499_c0_g1_i1.p1	TRINITY_DN1317_c0_g1_i21.p1	TRINITY_DN4903_c0_g1_i4.p2	TRINITY_DN5555_c0_g1_i1.p1	TRINITY_DN16902_c0_g3_i1.p1	TRINITY_DN24422_c0_g1_i1.p1	TRINITY_DN82131_c2_g1_i1.p1	TRINITY_DN15136_c0_g1_i1.p1
140197at6656	TRUE	38	95	FBpp0078227	TRINITY_DN46321_c0_g1_i1.p1	TRINITY_DN33821_c0_g1_i1.p3	TRINITY_DN47096_c0_g1_i2.p1	c76381_g1_i1.p1	SMAR008670-PA	TRINITY_DN24398_c0_g5_i1.p1	TRINITY_DN43093_c1_g2_i2.p1	TRINITY_DN16929_c0_g1_i1.p1	TRINITY_DN13217_c0_g1_i1.p1	TRINITY_DN2470_c0_g1_i2.p1	TRINITY_DN12940_c0_g1_i1.p1	TRINITY_DN3224_c0_g1_i2.p2	TRINITY_DN9406_c0_g1_i2.p1	TRINITY_DN4985_c0_g1_i2.p1	TRINITY_DN89229_c0_g1_i1.p1	TRINITY_DN39438_c0_g1_i1.p1	TRINITY_DN65968_c0_g2_i1.p1	TRINITY_DN43637_c0_g1_i1.p1			TRINITY_DN4474_c0_g1_i4.p1	TRINITY_DN31010_c0_g1_i1.p1	TRINITY_DN7289_c0_g1_i1.p1	TRINITY_DN3369_c0_g1_i1.p1	TRINITY_DN53483_c0_g1_i1.p1	TRINITY_DN865_c0_g1_i1.p1	TRINITY_DN1016_c0_g1_i2.p1	TRINITY_DN5488_c0_g1_i1.p1	TRINITY_DN5790_c0_g1_i2.p1	TRINITY_DN19607_c0_g1_i1.p1	TRINITY_DN1982_c0_g1_i11.p1	TRINITY_DN749_c0_g1_i5.p1	TRINITY_DN2324_c1_g2_i7.p2	TRINITY_DN6612_c0_g1_i3.p1	TRINITY_DN1611_c0_g1_i10.p3	TRINITY_DN3386_c0_g1_i1.p1	TRINITY_DN28217_c0_g2_i2.p1	TRINITY_DN83663_c0_g1_i1.p1	TRINITY_DN10432_c0_g1_i1.p1
144853at6656	TRUE	38	95	FBpp0081082	TRINITY_DN12693_c0_g1_i1.p1	TRINITY_DN19793_c0_g1_i1.p1	TRINITY_DN50185_c0_g3_i2.p1	c67836_g1_i1.p1	SMAR008598-PA	TRINITY_DN18005_c0_g1_i1.p1		TRINITY_DN2218_c0_g2_i2.p1	TRINITY_DN2968_c0_g1_i13.p2	TRINITY_DN2728_c0_g1_i1.p1	TRINITY_DN8089_c0_g1_i2.p1	TRINITY_DN40362_c0_g1_i1.p1	TRINITY_DN6191_c0_g1_i1.p1	TRINITY_DN2986_c1_g1_i1.p1	TRINITY_DN89101_c0_g1_i1.p1	TRINITY_DN33683_c1_g2_i8.p1	TRINITY_DN68218_c0_g1_i1.p1	TRINITY_DN58954_c0_g1_i1.p1	TRINITY_DN44037_c0_g1_i2.p1		TRINITY_DN5962_c0_g1_i1.p1	TRINITY_DN3610_c0_g1_i1.p1	TRINITY_DN22138_c0_g1_i1.p2	TRINITY_DN40117_c0_g1_i1.p1	TRINITY_DN4802_c0_g1_i1.p1	TRINITY_DN6415_c0_g1_i2.p1	TRINITY_DN5229_c2_g1_i1.p1	TRINITY_DN5683_c0_g1_i1.p1	TRINITY_DN3056_c0_g1_i11.p2	TRINITY_DN5019_c0_g1_i3.p1	TRINITY_DN35383_c0_g2_i1.p1	TRINITY_DN1819_c0_g1_i2.p2	TRINITY_DN12058_c0_g1_i1.p1	TRINITY_DN6884_c0_g1_i3.p2	TRINITY_DN4202_c0_g1_i1.p1	TRINITY_DN31577_c0_g1_i1.p1	TRINITY_DN9867_c0_g1_i1.p1	TRINITY_DN12532_c0_g1_i1.p1	TRINITY_DN16066_c0_g1_i1.p1
151436at6656	TRUE	38	95	FBpp0074663	TRINITY_DN31786_c0_g1_i1.p1	TRINITY_DN25761_c0_g1_i3.p4	TRINITY_DN38048_c0_g1_i1.p1	c82580_g1_i1.p1	SMAR004771-PA	TRINITY_DN11805_c0_g1_i1.p1		TRINITY_DN3874_c0_g1_i1.p2	TRINITY_DN2689_c0_g1_i18.p4	TRINITY_DN1203_c0_g1_i1.p1	TRINITY_DN27211_c0_g1_i1.p1	TRINITY_DN622_c0_g1_i1.p1	TRINITY_DN1427_c0_g1_i1.p1	TRINITY_DN5750_c0_g1_i1.p1	TRINITY_DN20828_c0_g1_i1.p1	TRINITY_DN31506_c1_g3_i1.p1	TRINITY_DN66836_c0_g1_i1.p1	TRINITY_DN77078_c0_g1_i1.p1	TRINITY_DN28707_c0_g1_i1.p1	TRINITY_DN2322_c0_g1_i1.p1	TRINITY_DN12455_c0_g1_i2.p1	TRINITY_DN1828_c0_g1_i1.p1	TRINITY_DN20321_c0_g1_i1.p1	TRINITY_DN4180_c0_g1_i3.p2	TRINITY_DN1589_c0_g1_i1.p1	TRINITY_DN822_c0_g1_i2.p1	TRINITY_DN31109_c0_g1_i1.p1	TRINITY_DN5851_c0_g1_i1.p1	TRINITY_DN3629_c0_g1_i11.p1	TRINITY_DN23348_c0_g1_i1.p1	TRINITY_DN2903_c0_g1_i1.p1	TRINITY_DN3770_c0_g1_i1.p2	TRINITY_DN2018_c0_g1_i6.p1	TRINITY_DN3086_c1_g1_i1.p1	TRINITY_DN5264_c0_g1_i1.p1		TRINITY_DN17843_c0_g1_i1.p1	TRINITY_DN49401_c0_g1_i1.p1	TRINITY_DN12105_c1_g1_i1.p1
64046at6656	FALSE	36	90	FBpp0288542	TRINITY_DN14133_c0_g1_i2.p1	TRINITY_DN22259_c0_g2_i1.p1	TRINITY_DN45918_c1_g1_i1.p1	c91342_g9_i1.p1	SMAR003100-PA	TRINITY_DN27606_c0_g2_i1.p1	TRINITY_DN40791_c1_g1_i1.p1	TRINITY_DN6465_c0_g1_i5.p1	TRINITY_DN531_c0_g3_i2.p1	TRINITY_DN8151_c0_g1_i1.p1	TRINITY_DN4815_c0_g1_i1.p1	TRINITY_DN29942_c0_g1_i2.p1		TRINITY_DN33637_c0_g1_i1.p1	TRINITY_DN28505_c0_g1_i1.p1	TRINITY_DN24890_c0_g1_i1.p1		TRINITY_DN86505_c0_g1_i3.p1			TRINITY_DN21696_c0_g1_i1.p1	TRINITY_DN16800_c0_g1_i2.p1	TRINITY_DN958_c0_g1_i1.p1	TRINITY_DN22532_c0_g1_i1.p1	TRINITY_DN73809_c0_g1_i1.p1	TRINITY_DN31295_c0_g1_i1.p1	TRINITY_DN2040_c0_g1_i5.p1	TRINITY_DN5144_c0_g1_i1.p1	TRINITY_DN317_c0_g1_i3.p1	TRINITY_DN2819_c0_g1_i2.p1	TRINITY_DN13771_c0_g1_i1.p1	TRINITY_DN8414_c2_g1_i1.p1	TRINITY_DN4897_c0_g1_i1.p1	TRINITY_DN2098_c0_g1_i9.p1	TRINITY_DN2011_c0_g1_i2.p1	TRINITY_DN25160_c0_g1_i2.p1	TRINITY_DN46413_c0_g1_i1.p1	TRINITY_DN80503_c0_g1_i2.p1	TRINITY_DN11288_c1_g1_i1.p1
159231at6656	TRUE	38	95	FBpp0083893	TRINITY_DN12799_c0_g1_i1.p1	TRINITY_DN62133_c0_g1_i1.p1	TRINITY_DN73872_c0_g1_i1.p1	c13202_g1_i1.p1	SMAR010866-PA	TRINITY_DN17486_c0_g1_i1.p1	TRINITY_DN16980_c0_g1_i1.p1	TRINITY_DN741_c0_g1_i1.p1	TRINITY_DN15127_c0_g1_i1.p1	TRINITY_DN2681_c0_g1_i1.p1	TRINITY_DN3277_c0_g1_i1.p1	TRINITY_DN24502_c0_g1_i1.p1	TRINITY_DN9891_c0_g1_i1.p1	TRINITY_DN13190_c0_g1_i2.p1	TRINITY_DN27507_c0_g2_i1.p1	TRINITY_DN33953_c1_g1_i2.p3	TRINITY_DN78793_c0_g1_i1.p1	TRINITY_DN77211_c0_g1_i1.p1			TRINITY_DN689_c2_g1_i2.p1	TRINITY_DN13926_c0_g1_i1.p1	TRINITY_DN3918_c0_g1_i2.p1	TRINITY_DN4119_c0_g1_i11.p1	TRINITY_DN45817_c0_g1_i1.p1	TRINITY_DN1978_c0_g1_i4.p2	TRINITY_DN2535_c0_g1_i2.p1	TRINITY_DN1811_c1_g1_i1.p1	TRINITY_DN4083_c1_g2_i2.p3	TRINITY_DN65_c0_g1_i2.p1	TRINITY_DN7612_c0_g1_i2.p1	TRINITY_DN10478_c0_g1_i6.p1	TRINITY_DN1059_c0_g2_i1.p1	TRINITY_DN1039_c0_g1_i1.p1	TRINITY_DN375_c0_g1_i1.p1	TRINITY_DN4003_c0_g1_i1.p1	TRINITY_DN31139_c0_g1_i4.p2	TRINITY_DN25796_c0_g1_i1.p1	TRINITY_DN16098_c0_g1_i1.p1
67166at6656	FALSE	37	92.5	FBpp0076558	TRINITY_DN11649_c0_g2_i1.p1	TRINITY_DN34058_c0_g1_i1.p1	TRINITY_DN51733_c0_g1_i1.p1	c85717_g2_i1.p1	SMAR010889-PA	TRINITY_DN28023_c0_g4_i1.p1	TRINITY_DN42210_c2_g2_i2.p1	TRINITY_DN3569_c0_g1_i1.p1	TRINITY_DN2533_c0_g1_i2.p1	TRINITY_DN21296_c0_g1_i1.p1	TRINITY_DN5045_c0_g1_i1.p1	TRINITY_DN2336_c1_g2_i1.p1		TRINITY_DN26554_c0_g1_i3.p1		TRINITY_DN28254_c0_g1_i1.p1	TRINITY_DN65205_c1_g1_i1.p1	TRINITY_DN87501_c4_g1_i1.p1	TRINITY_DN46348_c0_g1_i1.p1		TRINITY_DN4355_c0_g1_i2.p1	TRINITY_DN38948_c0_g1_i1.p1	TRINITY_DN600_c0_g1_i3.p1	TRINITY_DN6067_c0_g2_i1.p1	TRINITY_DN9_c0_g1_i1.p1	TRINITY_DN16448_c0_g1_i1.p1	TRINITY_DN379_c0_g1_i2.p1	TRINITY_DN3579_c0_g1_i2.p1	TRINITY_DN558_c0_g1_i11.p1	TRINITY_DN1480_c0_g1_i9.p1	TRINITY_DN10823_c0_g1_i2.p1	TRINITY_DN57028_c0_g1_i1.p1	TRINITY_DN66_c0_g1_i1.p1	TRINITY_DN999_c0_g1_i3.p1	TRINITY_DN1472_c0_g1_i1.p1	TRINITY_DN25238_c1_g2_i4.p1	TRINITY_DN31357_c0_g1_i2.p1	TRINITY_DN15723_c0_g1_i1.p1	TRINITY_DN12405_c0_g1_i1.p1
162147at6656	TRUE	38	95	FBpp0080284	TRINITY_DN66388_c0_g1_i1.p1	TRINITY_DN28828_c0_g1_i1.p1	TRINITY_DN36629_c0_g1_i1.p1	c73966_g1_i1.p1	SMAR008730-PA		TRINITY_DN32919_c0_g1_i1.p1	TRINITY_DN43290_c0_g1_i1.p1	TRINITY_DN22825_c0_g1_i1.p1	TRINITY_DN1950_c0_g1_i1.p1	TRINITY_DN6842_c0_g1_i2.p1	TRINITY_DN13000_c0_g1_i1.p1	TRINITY_DN8818_c0_g2_i2.p1	TRINITY_DN1178_c0_g1_i1.p1	TRINITY_DN30574_c0_g1_i1.p1	TRINITY_DN26159_c0_g1_i1.p1	TRINITY_DN71186_c1_g1_i4.p1	TRINITY_DN78662_c0_g1_i1.p1	TRINITY_DN46272_c0_g1_i1.p1		TRINITY_DN1251_c0_g1_i3.p1	TRINITY_DN7058_c0_g1_i3.p1	TRINITY_DN9570_c0_g1_i1.p1	TRINITY_DN862_c0_g1_i1.p1	TRINITY_DN1670_c0_g1_i1.p1	TRINITY_DN63839_c0_g1_i2.p1	TRINITY_DN6377_c0_g2_i1.p1	TRINITY_DN9596_c0_g1_i1.p1	TRINITY_DN416_c0_g1_i1.p2	TRINITY_DN5228_c0_g1_i2.p1	TRINITY_DN1648_c0_g1_i1.p1	TRINITY_DN4434_c0_g1_i4.p2	TRINITY_DN2598_c0_g1_i5.p1	TRINITY_DN1505_c0_g1_i11.p1	TRINITY_DN26757_c0_g1_i1.p1	TRINITY_DN12382_c0_g1_i1.p1	TRINITY_DN4184_c0_g1_i1.p1	TRINITY_DN86985_c0_g1_i1.p1	TRINITY_DN9845_c0_g1_i1.p1
76342at6656	FALSE	37	92.5	FBpp0072054	TRINITY_DN7145_c0_g2_i1.p1	TRINITY_DN6289_c0_g1_i1.p2	TRINITY_DN52459_c5_g1_i1.p1	c83596_g1_i1.p1	SMAR005660-PA	TRINITY_DN25933_c0_g1_i1.p1	TRINITY_DN29264_c0_g1_i1.p1	TRINITY_DN1667_c0_g1_i2.p2	TRINITY_DN1383_c0_g1_i11.p2	TRINITY_DN22499_c0_g1_i1.p1	TRINITY_DN33501_c0_g1_i1.p1	TRINITY_DN6595_c0_g1_i1.p1		TRINITY_DN4210_c0_g1_i3.p1	TRINITY_DN15032_c0_g1_i1.p1	TRINITY_DN30847_c0_g1_i2.p1	TRINITY_DN67620_c0_g2_i1.p1	TRINITY_DN82734_c1_g5_i3.p1			TRINITY_DN1682_c0_g1_i1.p1	TRINITY_DN2139_c0_g1_i2.p1	TRINITY_DN15314_c0_g1_i1.p1	TRINITY_DN12347_c0_g1_i3.p1	TRINITY_DN85539_c0_g1_i1.p1	TRINITY_DN65470_c0_g1_i1.p1	TRINITY_DN7064_c0_g1_i1.p1	TRINITY_DN5758_c0_g1_i19.p3	TRINITY_DN12185_c0_g1_i1.p1	TRINITY_DN2660_c0_g1_i12.p2	TRINITY_DN3659_c0_g2_i1.p1	TRINITY_DN11692_c0_g1_i2.p1	TRINITY_DN1891_c0_g1_i4.p1	TRINITY_DN4200_c0_g1_i1.p1	TRINITY_DN14318_c0_g1_i1.p1	TRINITY_DN15616_c0_g1_i2.p1	TRINITY_DN31484_c0_g1_i2.p1	TRINITY_DN81095_c0_g1_i1.p1	TRINITY_DN15597_c0_g1_i1.p1
17096at6656	TRUE	38	95	FBpp0072779	TRINITY_DN6635_c0_g2_i1.p1	TRINITY_DN27993_c0_g2_i2.p1	TRINITY_DN51228_c0_g1_i1.p1	c70474_g1_i1.p1	SMAR008671-PA	TRINITY_DN26895_c1_g1_i1.p1	TRINITY_DN26206_c0_g3_i1.p1	TRINITY_DN2669_c0_g1_i13.p1	TRINITY_DN8547_c0_g1_i1.p1	TRINITY_DN21421_c0_g1_i1.p1	TRINITY_DN1078_c2_g1_i1.p1	TRINITY_DN2268_c0_g1_i2.p1		TRINITY_DN2004_c0_g1_i6.p1	TRINITY_DN25473_c0_g1_i1.p1	TRINITY_DN32015_c6_g1_i3.p1	TRINITY_DN10487_c0_g1_i1.p1	TRINITY_DN81919_c4_g1_i1.p1	TRINITY_DN1309_c0_g1_i1.p1		TRINITY_DN2674_c0_g2_i1.p1	TRINITY_DN5550_c0_g1_i3.p1	TRINITY_DN4350_c0_g1_i1.p1	TRINITY_DN4362_c0_g1_i4.p1	TRINITY_DN70045_c0_g1_i1.p1	TRINITY_DN61255_c0_g1_i3.p1	TRINITY_DN17967_c0_g2_i1.p1	TRINITY_DN3432_c0_g1_i4.p1	TRINITY_DN1798_c0_g1_i6.p1	TRINITY_DN8054_c0_g1_i1.p1	TRINITY_DN3659_c0_g1_i1.p1	TRINITY_DN6922_c1_g1_i5.p1	TRINITY_DN1489_c0_g2_i1.p1	TRINITY_DN2589_c0_g1_i12.p1	TRINITY_DN9274_c0_g1_i1.p1	TRINITY_DN23389_c0_g2_i2.p1	TRINITY_DN31261_c0_g2_i1.p1	TRINITY_DN75717_c0_g1_i1.p1	TRINITY_DN13085_c8_g2_i1.p1
81406at6656	FALSE	38	95	FBpp0080775	TRINITY_DN66836_c0_g1_i1.p1	TRINITY_DN30492_c0_g1_i2.p1	TRINITY_DN49230_c0_g2_i1.p2	c94319_g1_i1.p1	SMAR000732-PA	TRINITY_DN25990_c1_g1_i2.p1	TRINITY_DN5529_c0_g1_i1.p1	TRINITY_DN8244_c0_g1_i1.p1	TRINITY_DN3764_c0_g1_i4.p1	TRINITY_DN9441_c0_g1_i1.p1	TRINITY_DN4717_c0_g1_i4.p1	TRINITY_DN5000_c0_g1_i2.p1	TRINITY_DN337_c0_g1_i14.p1	TRINITY_DN12926_c0_g1_i1.p1	TRINITY_DN60543_c0_g1_i1.p1	TRINITY_DN27180_c0_g1_i2.p1	TRINITY_DN70161_c0_g1_i1.p1	TRINITY_DN85040_c0_g2_i2.p1			TRINITY_DN1265_c0_g1_i3.p1	TRINITY_DN38607_c0_g1_i1.p1	TRINITY_DN10010_c0_g1_i1.p1	TRINITY_DN1945_c0_g1_i1.p1	TRINITY_DN1922_c0_g1_i3.p1	TRINITY_DN660_c0_g1_i4.p1	TRINITY_DN894_c0_g1_i10.p1	TRINITY_DN6244_c0_g1_i8.p1	TRINITY_DN5604_c0_g1_i9.p1	TRINITY_DN6576_c0_g1_i1.p1	TRINITY_DN18113_c0_g1_i1.p1	TRINITY_DN3674_c0_g1_i1.p1	TRINITY_DN2546_c0_g1_i6.p1	TRINITY_DN5045_c0_g1_i2.p1	TRINITY_DN1210_c0_g1_i2.p1	TRINITY_DN25834_c0_g1_i2.p1	TRINITY_DN30934_c0_g2_i1.p1	TRINITY_DN84820_c0_g1_i1.p1	TRINITY_DN12993_c0_g1_i1.p2
83102at6656	FALSE	38	95	FBpp0080890	TRINITY_DN19749_c0_g1_i1.p1	TRINITY_DN27962_c0_g1_i2.p1	TRINITY_DN48820_c0_g1_i2.p1	c57016_g1_i1.p1	SMAR011666-PA	TRINITY_DN22825_c0_g1_i1.p1	TRINITY_DN43056_c2_g3_i2.p1	TRINITY_DN10575_c0_g2_i2.p1	TRINITY_DN2992_c0_g1_i3.p1	TRINITY_DN3693_c0_g5_i1.p1	TRINITY_DN2945_c0_g1_i1.p1	TRINITY_DN3067_c0_g1_i2.p1		TRINITY_DN981_c0_g1_i10.p1	TRINITY_DN18289_c0_g2_i1.p1	TRINITY_DN22056_c0_g1_i1.p1	TRINITY_DN71371_c0_g1_i1.p1	TRINITY_DN62239_c0_g1_i1.p1	TRINITY_DN45341_c0_g1_i1.p1		TRINITY_DN3771_c0_g1_i1.p1	TRINITY_DN1720_c0_g1_i3.p1	TRINITY_DN3370_c0_g1_i1.p1	TRINITY_DN4961_c0_g1_i1.p1	TRINITY_DN11203_c0_g3_i1.p1	TRINITY_DN1508_c0_g1_i1.p1	TRINITY_DN1489_c0_g1_i9.p1	TRINITY_DN10515_c0_g1_i1.p1	TRINITY_DN2241_c0_g1_i2.p1	TRINITY_DN372_c0_g1_i1.p1	TRINITY_DN1776_c0_g1_i1.p1	TRINITY_DN463_c0_g1_i1.p1	TRINITY_DN26314_c0_g1_i1.p1	TRINITY_DN9359_c0_g1_i6.p1	TRINITY_DN141_c0_g1_i4.p1	TRINITY_DN23879_c0_g1_i1.p1	TRINITY_DN29717_c0_g1_i3.p1	TRINITY_DN82616_c3_g8_i1.p1	TRINITY_DN7725_c0_g1_i1.p1
20093at6656	TRUE	38	95	FBpp0082592	TRINITY_DN15478_c0_g2_i2.p1	TRINITY_DN21294_c0_g1_i1.p1	TRINITY_DN53151_c0_g1_i4.p1	c99137_g4_i3.p1	SMAR008219-PA	TRINITY_DN26595_c0_g1_i1.p1	TRINITY_DN42444_c1_g1_i1.p1	TRINITY_DN4886_c0_g1_i1.p1	TRINITY_DN22716_c0_g1_i1.p1	TRINITY_DN5318_c0_g1_i1.p1	TRINITY_DN8409_c0_g1_i1.p1	TRINITY_DN40916_c0_g1_i1.p1	TRINITY_DN923_c0_g1_i1.p2	TRINITY_DN1583_c0_g1_i2.p1	TRINITY_DN22362_c0_g1_i1.p1	TRINITY_DN32770_c0_g1_i9.p2	TRINITY_DN68920_c0_g1_i1.p1	TRINITY_DN81967_c0_g3_i1.p1			TRINITY_DN47045_c0_g1_i1.p1	TRINITY_DN7048_c0_g1_i3.p1	TRINITY_DN19581_c0_g1_i2.p1	TRINITY_DN37722_c0_g1_i1.p1	TRINITY_DN929_c0_g1_i1.p1	TRINITY_DN5687_c0_g1_i4.p1	TRINITY_DN7746_c0_g1_i1.p1	TRINITY_DN8819_c0_g2_i3.p1	TRINITY_DN3942_c0_g2_i5.p1	TRINITY_DN10103_c0_g1_i1.p1	TRINITY_DN23172_c0_g1_i1.p1	TRINITY_DN7421_c0_g1_i2.p1	TRINITY_DN15871_c0_g1_i1.p1	TRINITY_DN24956_c0_g1_i1.p1	TRINITY_DN27327_c0_g1_i1.p1	TRINITY_DN23864_c0_g1_i1.p1	TRINITY_DN31277_c0_g4_i2.p1	TRINITY_DN84538_c0_g1_i1.p1	TRINITY_DN13187_c0_g2_i1.p1
84149at6656	FALSE	39	97.5	FBpp0078093	TRINITY_DN17221_c0_g1_i2.p1	TRINITY_DN25766_c0_g2_i1.p1	TRINITY_DN20675_c0_g1_i1.p1	c77469_g1_i1.p1	SMAR008479-PA	TRINITY_DN62814_c0_g1_i1.p1	TRINITY_DN37689_c1_g1_i2.p1	TRINITY_DN1396_c0_g1_i1.p1	TRINITY_DN400_c0_g1_i1.p1	TRINITY_DN1262_c0_g1_i3.p1	TRINITY_DN908_c0_g1_i5.p1	TRINITY_DN3260_c0_g2_i1.p1	TRINITY_DN37346_c0_g1_i1.p1	TRINITY_DN6894_c1_g1_i1.p1	TRINITY_DN84086_c0_g1_i1.p1	TRINITY_DN31700_c2_g1_i2.p1		TRINITY_DN83261_c0_g1_i1.p1	TRINITY_DN61400_c0_g1_i1.p1	TRINITY_DN17451_c1_g1_i1.p1	TRINITY_DN7693_c0_g1_i1.p1	TRINITY_DN4846_c0_g1_i2.p1	TRINITY_DN3079_c0_g1_i2.p1	TRINITY_DN2389_c0_g1_i1.p1	TRINITY_DN11238_c0_g1_i1.p1	TRINITY_DN15843_c0_g1_i7.p1	TRINITY_DN3725_c0_g1_i15.p2	TRINITY_DN55061_c0_g1_i2.p1	TRINITY_DN9832_c0_g2_i5.p2	TRINITY_DN1358_c0_g1_i7.p1	TRINITY_DN1953_c0_g1_i2.p1	TRINITY_DN10998_c0_g1_i4.p1	TRINITY_DN1464_c0_g1_i5.p1	TRINITY_DN6531_c0_g1_i2.p1	TRINITY_DN1812_c0_g1_i12.p1	TRINITY_DN10921_c0_g1_i1.p1	TRINITY_DN30298_c0_g1_i2.p1	TRINITY_DN59076_c0_g1_i2.p1	TRINITY_DN13338_c3_g1_i1.p1
29744at6656	TRUE	38	95	FBpp0077151	TRINITY_DN21110_c0_g1_i1.p1	TRINITY_DN32422_c0_g1_i3.p1	TRINITY_DN50392_c0_g1_i1.p1	c94663_g1_i1.p1	SMAR008842-PA	TRINITY_DN28577_c0_g3_i1.p1	TRINITY_DN37338_c0_g1_i1.p1	TRINITY_DN5364_c0_g1_i4.p1	TRINITY_DN2613_c0_g1_i3.p1	TRINITY_DN6813_c0_g1_i1.p1	TRINITY_DN5769_c0_g1_i4.p1	TRINITY_DN7753_c0_g1_i1.p1		TRINITY_DN3323_c0_g1_i4.p1	TRINITY_DN64027_c0_g1_i1.p1	TRINITY_DN27594_c0_g1_i3.p1	TRINITY_DN49333_c0_g1_i1.p1	TRINITY_DN81864_c0_g2_i2.p1		TRINITY_DN21661_c0_g1_i1.p1	TRINITY_DN12564_c0_g3_i1.p1	TRINITY_DN38181_c0_g1_i1.p1	TRINITY_DN5574_c0_g1_i3.p1	TRINITY_DN2434_c0_g1_i2.p1	TRINITY_DN88001_c0_g1_i1.p1	TRINITY_DN11428_c0_g1_i1.p1	TRINITY_DN10229_c0_g1_i2.p1	TRINITY_DN12324_c0_g1_i6.p2	TRINITY_DN7195_c0_g1_i2.p1	TRINITY_DN28251_c0_g1_i1.p1	TRINITY_DN7111_c0_g1_i2.p1	TRINITY_DN23718_c0_g1_i2.p1	TRINITY_DN6168_c0_g1_i1.p1	TRINITY_DN4726_c0_g1_i1.p1	TRINITY_DN18334_c0_g1_i1.p1	TRINITY_DN18803_c1_g1_i1.p1	TRINITY_DN27979_c0_g1_i1.p1	TRINITY_DN29572_c0_g2_i1.p1	TRINITY_DN14309_c0_g1_i1.p1
8495at6656	FALSE	38	95	FBpp0307426	TRINITY_DN15581_c0_g1_i1.p1	TRINITY_DN28300_c2_g1_i1.p1	TRINITY_DN50651_c0_g1_i1.p1	c99204_g2_i1.p1	SMAR012703-PA	TRINITY_DN19718_c0_g4_i1.p1	TRINITY_DN121259_c0_g2_i1.p1	TRINITY_DN2394_c0_g3_i1.p1	TRINITY_DN4997_c0_g1_i1.p1	TRINITY_DN17341_c0_g1_i1.p1	TRINITY_DN5218_c0_g1_i1.p1	TRINITY_DN610_c0_g1_i15.p3		TRINITY_DN4166_c0_g1_i3.p1	TRINITY_DN3278_c0_g1_i1.p1	TRINITY_DN33219_c6_g1_i3.p1	TRINITY_DN29608_c0_g1_i1.p1	TRINITY_DN86510_c1_g2_i1.p1	TRINITY_DN47564_c0_g2_i1.p1		TRINITY_DN2786_c0_g1_i1.p1	TRINITY_DN16362_c0_g1_i1.p1	TRINITY_DN8251_c0_g1_i1.p1	TRINITY_DN8973_c0_g1_i1.p1	TRINITY_DN31123_c0_g1_i1.p1	TRINITY_DN26309_c0_g1_i1.p1	TRINITY_DN23311_c0_g1_i2.p1	TRINITY_DN9224_c0_g1_i2.p1	TRINITY_DN4497_c0_g1_i11.p1	TRINITY_DN23055_c0_g1_i5.p1	TRINITY_DN22646_c0_g1_i1.p1	TRINITY_DN5082_c0_g1_i1.p1	TRINITY_DN6450_c0_g1_i1.p1	TRINITY_DN16339_c0_g1_i1.p1	TRINITY_DN2630_c0_g1_i2.p1	TRINITY_DN13855_c0_g1_i1.p1	TRINITY_DN24339_c0_g2_i2.p1	TRINITY_DN92567_c2_g2_i1.p1	TRINITY_DN12381_c0_g1_i1.p1
35680at6656	TRUE	38	95	FBpp0081593	TRINITY_DN483_c0_g1_i1.p1	TRINITY_DN19410_c0_g1_i1.p1	TRINITY_DN46990_c0_g1_i1.p1	c97083_g1_i1.p1	SMAR005756-PA	TRINITY_DN8358_c0_g1_i1.p1	TRINITY_DN91992_c0_g1_i1.p1	TRINITY_DN27921_c0_g1_i1.p1	TRINITY_DN27129_c0_g1_i1.p1	TRINITY_DN14350_c0_g1_i1.p1	TRINITY_DN1759_c0_g1_i5.p1	TRINITY_DN29622_c0_g1_i1.p1	TRINITY_DN55877_c0_g1_i1.p1	TRINITY_DN2714_c1_g1_i1.p1	TRINITY_DN15363_c0_g2_i1.p1	TRINITY_DN33739_c1_g1_i3.p1	TRINITY_DN71321_c0_g1_i1.p1	TRINITY_DN69758_c0_g2_i1.p1			TRINITY_DN3443_c2_g1_i1.p1	TRINITY_DN19379_c0_g1_i1.p1	TRINITY_DN5119_c0_g1_i1.p1	TRINITY_DN9280_c0_g1_i1.p1	TRINITY_DN86965_c0_g1_i1.p1	TRINITY_DN22330_c0_g1_i1.p1	TRINITY_DN339_c0_g1_i6.p1	TRINITY_DN5880_c0_g1_i2.p2	TRINITY_DN2542_c0_g1_i16.p1	TRINITY_DN3882_c0_g1_i1.p2	TRINITY_DN9762_c0_g1_i1.p1	TRINITY_DN79622_c0_g1_i4.p1	TRINITY_DN931_c0_g1_i14.p1	TRINITY_DN15403_c0_g1_i1.p1	TRINITY_DN26902_c0_g1_i1.p1	TRINITY_DN5296_c0_g1_i1.p1	TRINITY_DN22280_c0_g3_i1.p1	TRINITY_DN91288_c0_g2_i3.p1	TRINITY_DN12185_c1_g1_i1.p1
37678at6656	TRUE	38	95	FBpp0086116	TRINITY_DN53718_c0_g1_i1.p1	TRINITY_DN26645_c0_g1_i1.p1	TRINITY_DN43980_c0_g1_i1.p1	c97230_g1_i6.p1	SMAR008595-PA	TRINITY_DN27697_c0_g5_i1.p1	TRINITY_DN42543_c0_g1_i3.p1	TRINITY_DN44080_c0_g1_i1.p1	TRINITY_DN4655_c0_g1_i1.p1	TRINITY_DN31364_c0_g1_i1.p1	TRINITY_DN10424_c0_g1_i1.p1	TRINITY_DN829_c0_g1_i12.p1		TRINITY_DN11597_c0_g1_i1.p1	TRINITY_DN49337_c0_g1_i1.p1	TRINITY_DN32458_c0_g1_i1.p1	TRINITY_DN105437_c0_g1_i1.p1	TRINITY_DN80660_c0_g1_i4.p1	TRINITY_DN30937_c0_g1_i1.p1		TRINITY_DN31816_c0_g1_i1.p1	TRINITY_DN41224_c0_g1_i1.p1	TRINITY_DN2605_c0_g1_i1.p1	TRINITY_DN3135_c0_g1_i2.p1	TRINITY_DN62905_c0_g1_i1.p1	TRINITY_DN2833_c0_g1_i1.p1	TRINITY_DN14606_c0_g1_i2.p1	TRINITY_DN2464_c0_g1_i5.p1	TRINITY_DN3071_c0_g1_i7.p1	TRINITY_DN18543_c0_g1_i1.p1	TRINITY_DN22719_c0_g1_i2.p1	TRINITY_DN3619_c0_g1_i2.p1	TRINITY_DN5098_c0_g1_i5.p1	TRINITY_DN26797_c0_g1_i1.p1	TRINITY_DN4852_c0_g1_i1.p1	TRINITY_DN2622_c0_g1_i1.p1	TRINITY_DN27700_c0_g2_i1.p1	TRINITY_DN91074_c1_g1_i1.p1	TRINITY_DN12844_c0_g1_i2.p1
40399at6656	TRUE	38	95	FBpp0081459	TRINITY_DN75946_c0_g1_i1.p1	TRINITY_DN33644_c0_g1_i1.p1	TRINITY_DN51295_c0_g1_i1.p1	c96424_g3_i2.p2	SMAR004977-PA	TRINITY_DN21826_c0_g2_i1.p1	TRINITY_DN35486_c0_g1_i1.p1	TRINITY_DN4823_c0_g1_i1.p1	TRINITY_DN5932_c0_g1_i2.p1	TRINITY_DN3825_c0_g1_i1.p1	TRINITY_DN28015_c0_g1_i1.p1	TRINITY_DN3725_c0_g1_i3.p2		TRINITY_DN10626_c0_g1_i1.p1	TRINITY_DN1022_c0_g1_i1.p1	TRINITY_DN32252_c0_g1_i2.p1	TRINITY_DN68725_c0_g1_i3.p1	TRINITY_DN81636_c0_g1_i1.p1	TRINITY_DN45129_c0_g2_i1.p1		TRINITY_DN2949_c0_g1_i2.p1	TRINITY_DN30883_c0_g1_i1.p1	TRINITY_DN22405_c0_g1_i1.p1	TRINITY_DN40802_c0_g1_i1.p1	TRINITY_DN44547_c0_g1_i1.p1	TRINITY_DN14086_c2_g1_i3.p1	TRINITY_DN5872_c0_g1_i4.p2	TRINITY_DN8268_c0_g1_i15.p1	TRINITY_DN2140_c0_g1_i13.p1	TRINITY_DN29726_c0_g1_i1.p1	TRINITY_DN31930_c0_g1_i1.p1	TRINITY_DN93876_c0_g1_i1.p1	TRINITY_DN3559_c1_g1_i1.p1	TRINITY_DN31562_c0_g1_i1.p1	TRINITY_DN6278_c0_g1_i1.p1	TRINITY_DN10074_c0_g1_i1.p1	TRINITY_DN29527_c0_g2_i3.p1	TRINITY_DN92477_c12_g1_i1.p1	TRINITY_DN12327_c0_g2_i2.p1
46750at6656	TRUE	38	95	FBpp0086158	TRINITY_DN8249_c0_g1_i1.p1	TRINITY_DN38127_c0_g1_i1.p1	TRINITY_DN44544_c0_g1_i1.p1	c98844_g1_i9.p2	SMAR007956-PA	TRINITY_DN27346_c1_g4_i1.p1	TRINITY_DN29595_c0_g1_i1.p1	TRINITY_DN7121_c0_g1_i2.p1	TRINITY_DN74_c0_g1_i58.p1	TRINITY_DN8347_c0_g1_i1.p1	TRINITY_DN3368_c0_g1_i2.p1	TRINITY_DN4342_c0_g1_i2.p1	TRINITY_DN1638_c0_g1_i1.p1	TRINITY_DN26502_c0_g1_i1.p1	TRINITY_DN19419_c0_g1_i1.p1	TRINITY_DN19969_c1_g1_i1.p1	TRINITY_DN68181_c0_g1_i1.p1	TRINITY_DN62512_c0_g1_i1.p1			TRINITY_DN1414_c0_g3_i2.p1	TRINITY_DN14435_c0_g1_i1.p1	TRINITY_DN169_c1_g1_i1.p1	TRINITY_DN920_c0_g1_i1.p2	TRINITY_DN5298_c0_g1_i2.p1	TRINITY_DN51794_c0_g1_i1.p1	TRINITY_DN1216_c0_g1_i3.p1	TRINITY_DN4269_c0_g1_i7.p1	TRINITY_DN3642_c0_g1_i1.p1	TRINITY_DN2821_c0_g1_i6.p1	TRINITY_DN10451_c0_g1_i2.p2	TRINITY_DN3449_c0_g1_i16.p1	TRINITY_DN26283_c0_g1_i1.p1	TRINITY_DN12720_c0_g1_i19.p1	TRINITY_DN13965_c0_g1_i1.p1	TRINITY_DN25660_c0_g1_i1.p1	TRINITY_DN25256_c1_g1_i1.p1	TRINITY_DN9947_c0_g1_i1.p1	TRINITY_DN12954_c0_g1_i1.p1
93483at6656	FALSE	38	95	FBpp0086872	TRINITY_DN11201_c0_g2_i1.p1	TRINITY_DN26185_c0_g3_i1.p1	TRINITY_DN51272_c0_g1_i1.p2	c85879_g1_i3.p1	SMAR007207-PA	TRINITY_DN28427_c0_g2_i1.p1	TRINITY_DN32938_c0_g2_i2.p1	TRINITY_DN43127_c0_g1_i1.p1	TRINITY_DN4601_c0_g1_i2.p1	TRINITY_DN6032_c0_g1_i1.p1	TRINITY_DN12421_c0_g1_i1.p1	TRINITY_DN27935_c0_g1_i1.p1		TRINITY_DN21658_c0_g1_i1.p1	TRINITY_DN26935_c0_g1_i1.p1	TRINITY_DN22785_c1_g3_i1.p1	TRINITY_DN67949_c0_g1_i4.p1	TRINITY_DN75692_c1_g1_i1.p1	TRINITY_DN79428_c0_g1_i1.p1		TRINITY_DN1574_c2_g1_i1.p1	TRINITY_DN41056_c0_g1_i1.p1	TRINITY_DN4510_c0_g1_i1.p1	TRINITY_DN15929_c0_g1_i1.p1	TRINITY_DN50066_c0_g1_i1.p1	TRINITY_DN21218_c0_g1_i2.p1	TRINITY_DN8325_c0_g1_i1.p1	TRINITY_DN55604_c0_g1_i1.p1	TRINITY_DN1272_c0_g1_i19.p1	TRINITY_DN8477_c0_g1_i3.p1	TRINITY_DN13522_c0_g1_i1.p1	TRINITY_DN6453_c0_g1_i3.p1	TRINITY_DN5293_c0_g1_i1.p1	TRINITY_DN7166_c0_g1_i2.p1	TRINITY_DN14411_c0_g1_i1.p1	TRINITY_DN13854_c0_g1_i1.p1	TRINITY_DN31088_c1_g3_i3.p1	TRINITY_DN91557_c0_g1_i1.p1	TRINITY_DN357_c0_g1_i1.p1
52224at6656	TRUE	38	95	FBpp0077079	TRINITY_DN12286_c0_g2_i1.p1	TRINITY_DN30844_c0_g1_i1.p1	TRINITY_DN43501_c0_g1_i2.p1	c84951_g1_i4.p1	SMAR005049-PA	TRINITY_DN25161_c0_g2_i1.p1	TRINITY_DN96193_c0_g1_i1.p1	TRINITY_DN19724_c0_g1_i1.p1	TRINITY_DN3244_c0_g1_i7.p1	TRINITY_DN5710_c0_g1_i1.p1	TRINITY_DN32648_c0_g1_i1.p1	TRINITY_DN3170_c0_g1_i2.p1	TRINITY_DN15288_c0_g1_i1.p1	TRINITY_DN21716_c0_g1_i1.p1	TRINITY_DN31300_c0_g1_i3.p1	TRINITY_DN33273_c0_g2_i2.p1	TRINITY_DN58582_c0_g1_i1.p1	TRINITY_DN74095_c0_g1_i1.p1			TRINITY_DN736_c3_g1_i2.p1	TRINITY_DN5981_c0_g1_i1.p1	TRINITY_DN17354_c0_g1_i1.p1	TRINITY_DN27879_c0_g1_i1.p1	TRINITY_DN64926_c0_g1_i1.p1	TRINITY_DN50630_c0_g1_i1.p1	TRINITY_DN24081_c0_g1_i1.p1	TRINITY_DN6149_c0_g1_i1.p1	TRINITY_DN33807_c0_g1_i1.p1	TRINITY_DN8613_c0_g1_i1.p1	TRINITY_DN28494_c0_g1_i2.p1	TRINITY_DN3624_c0_g1_i12.p2	TRINITY_DN3645_c0_g1_i3.p1	TRINITY_DN9495_c0_g1_i1.p1	TRINITY_DN2180_c0_g1_i7.p1	TRINITY_DN21081_c0_g1_i1.p1	TRINITY_DN24309_c0_g3_i1.p1	TRINITY_DN89473_c0_g1_i1.p1	TRINITY_DN13409_c17_g1_i1.p1
60729at6656	TRUE	38	95	FBpp0081493	TRINITY_DN11179_c0_g1_i1.p1	TRINITY_DN25734_c0_g1_i1.p1	TRINITY_DN48442_c0_g1_i1.p1	c98988_g2_i2.p2	SMAR008717-PA	TRINITY_DN26121_c0_g1_i1.p1	TRINITY_DN33913_c0_g1_i1.p1	TRINITY_DN2781_c0_g1_i1.p1	TRINITY_DN6331_c0_g1_i2.p1	TRINITY_DN10880_c0_g1_i1.p1	TRINITY_DN630_c0_g1_i12.p1	TRINITY_DN5020_c0_g1_i2.p2		TRINITY_DN4750_c0_g1_i1.p1	TRINITY_DN11534_c0_g2_i1.p1	TRINITY_DN32977_c2_g3_i1.p2	TRINITY_DN68721_c0_g1_i1.p1	TRINITY_DN85969_c0_g1_i2.p1	TRINITY_DN34119_c0_g1_i1.p1		TRINITY_DN9880_c0_g1_i1.p1	TRINITY_DN7397_c0_g1_i4.p1	TRINITY_DN16900_c0_g1_i1.p1	TRINITY_DN1418_c0_g1_i14.p1	TRINITY_DN92135_c0_g1_i1.p1	TRINITY_DN62084_c0_g1_i1.p1	TRINITY_DN2553_c0_g1_i1.p2	TRINITY_DN3796_c0_g1_i5.p2	TRINITY_DN1768_c0_g1_i5.p1	TRINITY_DN4675_c0_g1_i5.p2	TRINITY_DN1159_c0_g1_i5.p1	TRINITY_DN8723_c0_g1_i8.p1	TRINITY_DN3186_c0_g1_i2.p1	TRINITY_DN3825_c0_g1_i2.p1	TRINITY_DN28913_c0_g1_i1.p1	TRINITY_DN16816_c0_g3_i2.p1	TRINITY_DN25875_c0_g3_i2.p1	TRINITY_DN84806_c1_g1_i1.p1	TRINITY_DN16109_c0_g1_i1.p1
61081at6656	TRUE	38	95	FBpp0079488	TRINITY_DN2512_c0_g1_i1.p1	TRINITY_DN32837_c0_g2_i1.p1	TRINITY_DN50627_c0_g1_i1.p1	c99654_g2_i4.p2	SMAR014514-PA	TRINITY_DN24228_c0_g3_i4.p1	TRINITY_DN59089_c0_g1_i1.p1	TRINITY_DN9246_c0_g1_i1.p1	TRINITY_DN1694_c0_g1_i1.p2	TRINITY_DN7740_c0_g1_i1.p1	TRINITY_DN16830_c0_g1_i1.p1	TRINITY_DN8635_c0_g1_i15.p1	TRINITY_DN316_c0_g1_i1.p2	TRINITY_DN7747_c0_g1_i1.p1	TRINITY_DN24574_c0_g1_i1.p1		TRINITY_DN73323_c0_g1_i6.p1	TRINITY_DN73765_c0_g2_i1.p1		TRINITY_DN35683_c0_g1_i1.p1	TRINITY_DN9481_c0_g1_i1.p1	TRINITY_DN4725_c0_g1_i5.p1	TRINITY_DN6393_c0_g1_i2.p1	TRINITY_DN35508_c0_g1_i1.p1	TRINITY_DN18425_c0_g1_i1.p1	TRINITY_DN4815_c0_g1_i1.p1	TRINITY_DN3537_c0_g1_i2.p1	TRINITY_DN6266_c0_g1_i1.p1	TRINITY_DN4497_c0_g1_i18.p2	TRINITY_DN24004_c0_g1_i1.p1	TRINITY_DN11266_c0_g1_i1.p1	TRINITY_DN12025_c0_g2_i3.p1	TRINITY_DN9380_c0_g1_i2.p1	TRINITY_DN4947_c0_g3_i1.p1	TRINITY_DN9311_c0_g1_i1.p1	TRINITY_DN10471_c0_g2_i1.p1	TRINITY_DN39873_c0_g1_i1.p1	TRINITY_DN45633_c0_g1_i1.p1	TRINITY_DN3331_c0_g1_i1.p1
76745at6656	TRUE	38	95	FBpp0110211	TRINITY_DN22778_c0_g1_i1.p1	TRINITY_DN17185_c0_g1_i1.p1	TRINITY_DN84189_c0_g1_i1.p1	c87602_g1_i3.p1	SMAR004394-PA	TRINITY_DN13855_c0_g1_i1.p1	TRINITY_DN123773_c0_g3_i1.p1	TRINITY_DN16230_c0_g1_i1.p1	TRINITY_DN6522_c0_g1_i2.p1	TRINITY_DN4733_c0_g1_i1.p1	TRINITY_DN792_c0_g2_i3.p2	TRINITY_DN35163_c0_g1_i1.p2		TRINITY_DN9380_c0_g1_i1.p1	TRINITY_DN38405_c0_g1_i1.p1	TRINITY_DN3853_c0_g2_i1.p1	TRINITY_DN68899_c0_g1_i1.p1	TRINITY_DN55545_c1_g1_i1.p1	TRINITY_DN14445_c0_g2_i1.p1		TRINITY_DN883_c0_g1_i3.p1	TRINITY_DN5679_c0_g1_i2.p1	TRINITY_DN5845_c0_g1_i4.p1	TRINITY_DN40959_c0_g1_i1.p1	TRINITY_DN85440_c0_g1_i1.p1	TRINITY_DN31336_c0_g1_i2.p1	TRINITY_DN4690_c0_g1_i8.p1	TRINITY_DN11509_c0_g1_i1.p1	TRINITY_DN11362_c0_g1_i31.p1	TRINITY_DN1863_c0_g1_i1.p1	TRINITY_DN23193_c0_g1_i1.p1	TRINITY_DN33517_c0_g1_i1.p1	TRINITY_DN1799_c0_g1_i13.p3	TRINITY_DN4097_c0_g1_i4.p1	TRINITY_DN23620_c0_g1_i2.p1	TRINITY_DN15575_c0_g1_i1.p1	TRINITY_DN20850_c0_g1_i1.p1	TRINITY_DN64857_c0_g1_i2.p1	TRINITY_DN13133_c0_g1_i1.p1
97225at6656	FALSE	37	92.5	FBpp0088044	TRINITY_DN14572_c0_g2_i1.p1	TRINITY_DN29290_c0_g1_i1.p1	TRINITY_DN50929_c0_g1_i1.p1	c99439_g1_i1.p1		TRINITY_DN23594_c0_g2_i1.p1	TRINITY_DN38164_c0_g1_i2.p1	TRINITY_DN30963_c0_g1_i1.p1	TRINITY_DN2168_c0_g2_i1.p1	TRINITY_DN11799_c0_g1_i1.p1	TRINITY_DN22079_c0_g1_i1.p1	TRINITY_DN3979_c0_g1_i4.p1	TRINITY_DN30903_c0_g1_i1.p1	TRINITY_DN3952_c0_g1_i2.p1	TRINITY_DN26560_c0_g1_i1.p1	TRINITY_DN27279_c0_g1_i1.p1	TRINITY_DN44093_c0_g1_i1.p1	TRINITY_DN61633_c0_g1_i1.p1			TRINITY_DN4486_c0_g1_i5.p1	TRINITY_DN38405_c0_g1_i1.p1	TRINITY_DN14578_c0_g1_i1.p1	TRINITY_DN1336_c1_g2_i8.p1	TRINITY_DN3275_c0_g1_i2.p1	TRINITY_DN21071_c0_g1_i1.p1	TRINITY_DN5519_c0_g1_i1.p1	TRINITY_DN1325_c0_g1_i3.p1	TRINITY_DN5827_c0_g1_i1.p1	TRINITY_DN9325_c0_g1_i1.p1	TRINITY_DN19807_c0_g1_i1.p1	TRINITY_DN4372_c0_g1_i1.p1	TRINITY_DN6273_c0_g1_i2.p1	TRINITY_DN308_c0_g1_i5.p1	TRINITY_DN7884_c0_g1_i1.p1	TRINITY_DN25104_c0_g1_i1.p1	TRINITY_DN24547_c0_g2_i5.p1	TRINITY_DN83178_c0_g1_i1.p1	TRINITY_DN138_c0_g1_i1.p1
89677at6656	TRUE	38	95	FBpp0080389	TRINITY_DN14269_c0_g1_i1.p1	TRINITY_DN31597_c1_g1_i1.p1	TRINITY_DN51649_c0_g1_i1.p1	c80750_g1_i2.p1	SMAR012910-PA	TRINITY_DN24833_c0_g2_i3.p1	TRINITY_DN34299_c0_g1_i1.p1	TRINITY_DN3098_c0_g1_i5.p2	TRINITY_DN18876_c0_g1_i1.p1	TRINITY_DN1556_c0_g1_i1.p1	TRINITY_DN18498_c0_g1_i1.p1	TRINITY_DN5288_c0_g1_i1.p1	TRINITY_DN9611_c0_g1_i1.p2	TRINITY_DN872_c0_g1_i7.p1	TRINITY_DN29081_c0_g1_i3.p1	TRINITY_DN14444_c1_g2_i1.p1	TRINITY_DN56133_c0_g2_i1.p2	TRINITY_DN75735_c0_g1_i2.p1			TRINITY_DN16273_c0_g1_i1.p1	TRINITY_DN2048_c0_g1_i4.p1	TRINITY_DN5283_c0_g1_i2.p1	TRINITY_DN3582_c0_g1_i8.p1	TRINITY_DN6437_c0_g1_i1.p1	TRINITY_DN21284_c0_g1_i1.p1	TRINITY_DN12353_c0_g1_i3.p1	TRINITY_DN4181_c0_g1_i1.p1	TRINITY_DN1399_c0_g1_i28.p1	TRINITY_DN1897_c0_g1_i1.p1	TRINITY_DN27787_c0_g1_i1.p2	TRINITY_DN1863_c0_g1_i2.p1	TRINITY_DN1589_c0_g1_i1.p1	TRINITY_DN1927_c0_g1_i5.p1	TRINITY_DN4854_c0_g1_i2.p1	TRINITY_DN349_c0_g1_i1.p1	TRINITY_DN30480_c1_g8_i2.p1	TRINITY_DN91214_c2_g1_i2.p1	TRINITY_DN13114_c10_g1_i1.p1
132495at6656	TRUE	38	95	FBpp0077103	TRINITY_DN10170_c0_g1_i1.p1	TRINITY_DN31836_c0_g1_i3.p1	TRINITY_DN45704_c0_g1_i1.p1	c92852_g2_i3.p1	SMAR004434-PA	TRINITY_DN25636_c0_g2_i1.p1	TRINITY_DN36863_c0_g1_i1.p1	TRINITY_DN12984_c0_g1_i1.p1	TRINITY_DN1002_c0_g1_i1.p1	TRINITY_DN25190_c0_g1_i1.p1	TRINITY_DN7066_c1_g2_i2.p1	TRINITY_DN1674_c1_g1_i1.p1	TRINITY_DN6732_c0_g1_i3.p1	TRINITY_DN21870_c0_g1_i1.p1	TRINITY_DN12162_c0_g1_i1.p1	TRINITY_DN32686_c1_g10_i3.p1	TRINITY_DN65979_c2_g1_i1.p1	TRINITY_DN81807_c0_g2_i2.p1	TRINITY_DN34413_c0_g2_i1.p1		TRINITY_DN1336_c0_g1_i1.p1	TRINITY_DN1806_c0_g1_i1.p1	TRINITY_DN816_c0_g1_i1.p1	TRINITY_DN2694_c0_g1_i2.p1	TRINITY_DN13779_c0_g1_i4.p1	TRINITY_DN43549_c0_g1_i1.p1	TRINITY_DN1367_c0_g2_i2.p1	TRINITY_DN6095_c0_g1_i4.p1	TRINITY_DN5148_c0_g1_i2.p2	TRINITY_DN2083_c0_g1_i8.p1	TRINITY_DN4620_c0_g1_i1.p1	TRINITY_DN5486_c0_g2_i3.p1	TRINITY_DN456_c0_g2_i7.p1	TRINITY_DN4903_c0_g1_i8.p1	TRINITY_DN4290_c0_g1_i2.p1		TRINITY_DN28206_c0_g3_i4.p1	TRINITY_DN83650_c0_g1_i1.p1	TRINITY_DN10374_c0_g1_i1.p1
139834at6656	TRUE	38	95	FBpp0070969	TRINITY_DN18011_c0_g1_i1.p2	TRINITY_DN34358_c0_g1_i3.p2	TRINITY_DN98390_c0_g1_i1.p1	c69347_g1_i1.p1	SMAR000553-PA		TRINITY_DN41391_c0_g1_i2.p1	TRINITY_DN37788_c0_g1_i1.p1	TRINITY_DN2857_c0_g1_i8.p1	TRINITY_DN6667_c0_g1_i3.p1	TRINITY_DN596_c0_g1_i2.p1	TRINITY_DN1124_c0_g1_i2.p1	TRINITY_DN984_c0_g1_i2.p1	TRINITY_DN1787_c0_g1_i3.p1	TRINITY_DN23879_c0_g1_i3.p1	TRINITY_DN4146_c1_g1_i1.p1	TRINITY_DN64154_c0_g1_i1.p1	TRINITY_DN82078_c0_g1_i1.p1	TRINITY_DN41367_c0_g2_i1.p1		TRINITY_DN1155_c0_g1_i1.p1	TRINITY_DN4300_c0_g1_i2.p2	TRINITY_DN386_c0_g1_i1.p1	TRINITY_DN16348_c0_g1_i1.p1	TRINITY_DN2026_c0_g1_i2.p1	TRINITY_DN2658_c0_g1_i19.p2	TRINITY_DN8010_c0_g2_i4.p1	TRINITY_DN5131_c0_g1_i1.p2	TRINITY_DN747_c0_g1_i52.p2	TRINITY_DN925_c0_g1_i5.p1	TRINITY_DN3455_c0_g1_i1.p1	TRINITY_DN2189_c0_g1_i1.p1	TRINITY_DN3271_c0_g1_i2.p1	TRINITY_DN11045_c0_g1_i3.p1	TRINITY_DN3131_c0_g1_i1.p1	TRINITY_DN44754_c0_g1_i1.p1	TRINITY_DN27913_c0_g2_i2.p1	TRINITY_DN86481_c3_g1_i1.p1	TRINITY_DN16152_c0_g1_i1.p1
140461at6656	TRUE	38	95	FBpp0072691	TRINITY_DN11915_c0_g1_i1.p1	TRINITY_DN15003_c0_g2_i1.p1	TRINITY_DN42296_c0_g1_i1.p1	c95009_g1_i1.p1	SMAR014148-PA	TRINITY_DN24812_c0_g1_i2.p1	TRINITY_DN41404_c0_g2_i2.p1	TRINITY_DN33627_c0_g1_i1.p1	TRINITY_DN8156_c0_g1_i2.p1	TRINITY_DN2492_c0_g1_i1.p1	TRINITY_DN33609_c0_g1_i1.p1	TRINITY_DN1689_c0_g2_i1.p1	TRINITY_DN16399_c0_g1_i2.p1	TRINITY_DN5302_c0_g1_i1.p1	TRINITY_DN32112_c6_g9_i1.p1	TRINITY_DN25400_c0_g1_i1.p1	TRINITY_DN73041_c1_g2_i3.p1	TRINITY_DN64655_c0_g2_i1.p1			TRINITY_DN1436_c3_g1_i4.p1	TRINITY_DN31987_c0_g1_i1.p1	TRINITY_DN2769_c0_g1_i1.p1	TRINITY_DN3478_c0_g1_i1.p1	TRINITY_DN88347_c0_g1_i1.p1	TRINITY_DN53796_c0_g1_i2.p1	TRINITY_DN6786_c0_g1_i5.p1	TRINITY_DN6383_c0_g1_i11.p1	TRINITY_DN2478_c0_g1_i13.p1	TRINITY_DN5263_c0_g1_i1.p1	TRINITY_DN20777_c0_g1_i2.p1	TRINITY_DN1860_c0_g1_i3.p1	TRINITY_DN2342_c0_g1_i12.p2	TRINITY_DN39941_c0_g1_i1.p1	TRINITY_DN3248_c0_g1_i1.p1	TRINITY_DN20108_c0_g1_i1.p1	TRINITY_DN26245_c0_g4_i1.p1	TRINITY_DN161357_c0_g1_i1.p1	TRINITY_DN10948_c0_g1_i1.p1
141916at6656	TRUE	38	95	FBpp0071194	TRINITY_DN78024_c0_g1_i1.p1	TRINITY_DN22360_c1_g2_i1.p1	TRINITY_DN52279_c0_g3_i3.p2	c60211_g1_i1.p2	SMAR008390-PA	TRINITY_DN25382_c1_g1_i1.p1	TRINITY_DN23694_c0_g1_i1.p1	TRINITY_DN5678_c0_g1_i1.p1	TRINITY_DN4643_c0_g1_i1.p1	TRINITY_DN20737_c0_g1_i1.p1	TRINITY_DN4715_c0_g1_i2.p2	TRINITY_DN1690_c5_g1_i3.p1	TRINITY_DN1020_c0_g1_i1.p1	TRINITY_DN5044_c0_g1_i4.p1	TRINITY_DN28566_c0_g2_i1.p1	TRINITY_DN30100_c0_g1_i3.p2	TRINITY_DN64881_c0_g3_i1.p1	TRINITY_DN74035_c0_g1_i1.p1			TRINITY_DN51458_c0_g1_i1.p1	TRINITY_DN1431_c0_g1_i1.p1	TRINITY_DN4004_c0_g1_i2.p1	TRINITY_DN1169_c0_g1_i1.p1	TRINITY_DN9073_c0_g1_i1.p1	TRINITY_DN30889_c0_g1_i1.p1	TRINITY_DN5726_c0_g2_i6.p1	TRINITY_DN895_c0_g1_i17.p1	TRINITY_DN1393_c1_g1_i16.p1	TRINITY_DN6639_c0_g1_i2.p1	TRINITY_DN7317_c0_g2_i1.p1	TRINITY_DN8469_c0_g1_i5.p1	TRINITY_DN909_c0_g3_i2.p1	TRINITY_DN5166_c0_g1_i1.p1	TRINITY_DN13538_c0_g1_i2.p1	TRINITY_DN15853_c0_g1_i1.p1	TRINITY_DN29203_c2_g6_i3.p1	TRINITY_DN78818_c0_g2_i1.p1	TRINITY_DN13096_c2_g1_i1.p2
149796at6656	TRUE	38	95	FBpp0082570	TRINITY_DN4700_c0_g1_i1.p1	TRINITY_DN28422_c0_g2_i2.p2	TRINITY_DN20979_c0_g1_i1.p1	c65778_g1_i1.p1	SMAR008994-PA	TRINITY_DN21994_c0_g1_i1.p1	TRINITY_DN105586_c0_g1_i1.p1	TRINITY_DN37538_c0_g1_i2.p1	TRINITY_DN4246_c0_g1_i4.p3	TRINITY_DN3561_c0_g1_i2.p1	TRINITY_DN33842_c0_g1_i1.p1	TRINITY_DN34428_c0_g1_i1.p1		TRINITY_DN7179_c0_g2_i2.p1	TRINITY_DN26537_c0_g2_i1.p1	TRINITY_DN9921_c0_g2_i1.p1	TRINITY_DN68270_c0_g2_i1.p1	TRINITY_DN78850_c0_g3_i1.p2	TRINITY_DN91355_c0_g1_i1.p1	TRINITY_DN45280_c0_g1_i1.p1	TRINITY_DN5238_c0_g2_i1.p1		TRINITY_DN1113_c0_g1_i1.p1	TRINITY_DN8499_c0_g1_i6.p2	TRINITY_DN43782_c0_g1_i1.p1	TRINITY_DN1227_c0_g1_i3.p1	TRINITY_DN3666_c0_g1_i3.p2	TRINITY_DN4940_c0_g1_i1.p1	TRINITY_DN2099_c0_g1_i3.p1	TRINITY_DN32473_c0_g1_i1.p2	TRINITY_DN996_c0_g1_i8.p2	TRINITY_DN2341_c0_g1_i7.p2	TRINITY_DN91_c0_g1_i10.p2	TRINITY_DN9465_c0_g1_i4.p1	TRINITY_DN14413_c0_g1_i1.p2	TRINITY_DN44998_c0_g1_i1.p1	TRINITY_DN27488_c0_g1_i1.p1	TRINITY_DN42324_c0_g1_i1.p1	TRINITY_DN12924_c0_g2_i1.p1
23309at6656	TRUE	38	95	FBpp0076549	TRINITY_DN67565_c0_g1_i1.p1	TRINITY_DN31805_c0_g1_i1.p1	TRINITY_DN43446_c1_g1_i1.p1	c95632_g4_i9.p1	SMAR004779-PA	TRINITY_DN24075_c0_g1_i1.p1	TRINITY_DN4364_c0_g2_i1.p1	TRINITY_DN6876_c0_g1_i1.p1	TRINITY_DN3762_c0_g1_i7.p1	TRINITY_DN11700_c0_g1_i1.p1	TRINITY_DN6086_c0_g1_i2.p1	TRINITY_DN11978_c0_g1_i1.p1	TRINITY_DN8640_c0_g1_i1.p1	TRINITY_DN6521_c0_g2_i1.p1	TRINITY_DN65615_c0_g1_i1.p1	TRINITY_DN30066_c0_g1_i1.p1	TRINITY_DN62730_c0_g1_i1.p1	TRINITY_DN83468_c0_g2_i1.p1			TRINITY_DN19863_c0_g1_i1.p1	TRINITY_DN2526_c0_g1_i2.p1	TRINITY_DN12334_c0_g1_i1.p1	TRINITY_DN28117_c0_g1_i1.p1	TRINITY_DN65532_c0_g1_i1.p1	TRINITY_DN21043_c0_g1_i1.p1	TRINITY_DN5385_c1_g1_i1.p1	TRINITY_DN5245_c0_g1_i4.p1	TRINITY_DN2951_c0_g1_i12.p1	TRINITY_DN28096_c0_g1_i1.p1	TRINITY_DN32880_c0_g1_i1.p1	TRINITY_DN8482_c0_g1_i1.p1	TRINITY_DN1839_c2_g1_i4.p1	TRINITY_DN10519_c0_g1_i5.p1	TRINITY_DN22489_c0_g1_i1.p1	TRINITY_DN24818_c0_g2_i2.p1	TRINITY_DN27559_c0_g2_i4.p1	TRINITY_DN90382_c1_g3_i1.p1	TRINITY_DN13505_c0_g2_i1.p1
108240at6656	FALSE	38	95	FBpp0072037	TRINITY_DN22562_c0_g1_i1.p1	TRINITY_DN50300_c0_g2_i1.p1	TRINITY_DN52976_c4_g2_i1.p1	c94092_g1_i4.p1	SMAR009880-PA	TRINITY_DN17083_c0_g2_i1.p1	TRINITY_DN33465_c0_g1_i1.p1	TRINITY_DN19562_c0_g1_i1.p1	TRINITY_DN3508_c0_g1_i3.p1	TRINITY_DN6767_c0_g1_i1.p1	TRINITY_DN2850_c0_g1_i1.p1	TRINITY_DN3160_c0_g1_i2.p1	TRINITY_DN336_c0_g1_i3.p1	TRINITY_DN4782_c0_g2_i1.p1		TRINITY_DN28327_c0_g1_i6.p1	TRINITY_DN113725_c0_g1_i1.p1	TRINITY_DN110238_c0_g1_i1.p1	TRINITY_DN45106_c0_g1_i4.p1	TRINITY_DN70371_c0_g1_i1.p1	TRINITY_DN7722_c0_g1_i2.p1	TRINITY_DN3855_c0_g2_i1.p1	TRINITY_DN17484_c0_g1_i1.p1	TRINITY_DN17419_c0_g1_i1.p1	TRINITY_DN73450_c0_g1_i1.p1	TRINITY_DN53457_c0_g1_i1.p1	TRINITY_DN13565_c0_g1_i1.p1	TRINITY_DN3156_c0_g1_i1.p1	TRINITY_DN878_c0_g1_i15.p1	TRINITY_DN27607_c0_g1_i2.p1	TRINITY_DN5379_c0_g1_i1.p1	TRINITY_DN4132_c0_g1_i5.p1	TRINITY_DN19452_c0_g1_i3.p1	TRINITY_DN10190_c0_g1_i1.p1		TRINITY_DN3065_c0_g2_i1.p1	TRINITY_DN27468_c0_g1_i1.p1	TRINITY_DN70955_c0_g2_i2.p1	TRINITY_DN1383_c0_g1_i1.p1
55036at6656	TRUE	38	95	FBpp0077208	TRINITY_DN11692_c0_g1_i4.p1	TRINITY_DN33167_c0_g1_i4.p1	TRINITY_DN46268_c0_g1_i1.p1	c100901_g1_i3.p1	SMAR008427-PA	TRINITY_DN26827_c0_g4_i4.p1	TRINITY_DN28279_c0_g3_i1.p1	TRINITY_DN16568_c0_g1_i1.p1	TRINITY_DN8089_c0_g1_i1.p1	TRINITY_DN24711_c0_g1_i1.p1	TRINITY_DN25288_c0_g1_i1.p1	TRINITY_DN2180_c0_g1_i6.p1	TRINITY_DN8037_c0_g1_i1.p1	TRINITY_DN31165_c0_g1_i1.p1	TRINITY_DN66848_c0_g1_i1.p1	TRINITY_DN31631_c0_g1_i2.p1	TRINITY_DN40606_c0_g1_i1.p1	TRINITY_DN81148_c0_g2_i2.p1			TRINITY_DN17011_c0_g1_i1.p1	TRINITY_DN19387_c0_g1_i1.p1	TRINITY_DN14754_c0_g1_i1.p1	TRINITY_DN4550_c0_g1_i2.p1	TRINITY_DN50575_c0_g1_i1.p1	TRINITY_DN9056_c0_g1_i1.p1	TRINITY_DN329_c1_g2_i1.p1	TRINITY_DN14105_c0_g1_i7.p1	TRINITY_DN4909_c0_g1_i1.p1	TRINITY_DN31681_c0_g1_i1.p1	TRINITY_DN1730_c0_g1_i2.p1	TRINITY_DN13637_c0_g1_i6.p1	TRINITY_DN1654_c0_g1_i1.p1	TRINITY_DN30224_c0_g1_i1.p1	TRINITY_DN14407_c0_g1_i1.p1	TRINITY_DN6257_c0_g1_i1.p1	TRINITY_DN27814_c0_g1_i3.p1	TRINITY_DN88735_c0_g2_i1.p1	TRINITY_DN13710_c0_g3_i1.p1
62914at6656	TRUE	38	95	FBpp0079708	TRINITY_DN9323_c0_g3_i1.p1	TRINITY_DN30327_c0_g1_i1.p1	TRINITY_DN42718_c0_g1_i1.p1	c90171_g2_i1.p1	SMAR011832-PA	TRINITY_DN20793_c0_g2_i1.p1	TRINITY_DN45926_c0_g1_i1.p1	TRINITY_DN4193_c0_g1_i2.p1	TRINITY_DN12612_c0_g1_i1.p1	TRINITY_DN4859_c0_g1_i1.p1	TRINITY_DN7497_c0_g1_i1.p1	TRINITY_DN7397_c0_g1_i1.p1	TRINITY_DN12934_c0_g3_i1.p1	TRINITY_DN22515_c0_g1_i1.p1	TRINITY_DN4008_c0_g1_i1.p1	TRINITY_DN78935_c0_g1_i1.p1	TRINITY_DN2296_c1_g1_i1.p1	TRINITY_DN74248_c0_g1_i1.p1			TRINITY_DN34096_c0_g1_i1.p1	TRINITY_DN38817_c0_g1_i1.p1	TRINITY_DN6254_c0_g1_i4.p1	TRINITY_DN4172_c0_g1_i2.p1	TRINITY_DN5694_c0_g1_i1.p1	TRINITY_DN12173_c0_g1_i4.p1	TRINITY_DN4331_c1_g1_i7.p1	TRINITY_DN7567_c1_g1_i9.p1	TRINITY_DN11110_c1_g2_i17.p1	TRINITY_DN3002_c0_g1_i4.p1	TRINITY_DN10507_c0_g1_i2.p1	TRINITY_DN7535_c0_g2_i3.p1	TRINITY_DN7044_c0_g1_i2.p1	TRINITY_DN12946_c0_g1_i1.p1	TRINITY_DN16095_c0_g1_i1.p1	TRINITY_DN36050_c0_g1_i1.p1	TRINITY_DN25630_c0_g2_i1.p1	TRINITY_DN63085_c0_g1_i4.p1	TRINITY_DN10608_c0_g1_i1.p1
72857at6656	TRUE	38	95	FBpp0072033	TRINITY_DN6845_c0_g1_i1.p1	TRINITY_DN5654_c0_g1_i1.p1	TRINITY_DN52424_c1_g1_i4.p1	c68152_g1_i1.p1	SMAR004346-PA	TRINITY_DN23683_c0_g3_i1.p1	TRINITY_DN26090_c0_g1_i1.p1	TRINITY_DN4889_c0_g1_i1.p1	TRINITY_DN1018_c0_g1_i1.p1	TRINITY_DN24520_c0_g1_i1.p1	TRINITY_DN792_c0_g2_i1.p1	TRINITY_DN28008_c0_g1_i1.p1		TRINITY_DN4514_c0_g1_i1.p1	TRINITY_DN34155_c0_g1_i1.p1	TRINITY_DN27744_c1_g4_i4.p1	TRINITY_DN90657_c0_g1_i1.p1	TRINITY_DN86069_c0_g11_i1.p1	TRINITY_DN64581_c0_g1_i1.p1		TRINITY_DN3869_c0_g1_i1.p1	TRINITY_DN2760_c0_g1_i2.p1	TRINITY_DN11965_c0_g1_i2.p1	TRINITY_DN1750_c0_g1_i2.p1	TRINITY_DN63981_c0_g1_i1.p1	TRINITY_DN22364_c0_g1_i1.p1	TRINITY_DN897_c0_g3_i1.p1	TRINITY_DN55439_c0_g1_i1.p1	TRINITY_DN781_c0_g1_i89.p1	TRINITY_DN6232_c0_g1_i1.p1	TRINITY_DN1816_c0_g1_i1.p2	TRINITY_DN24942_c0_g1_i3.p1	TRINITY_DN8655_c0_g1_i2.p1	TRINITY_DN16904_c0_g1_i1.p1	TRINITY_DN23441_c0_g1_i1.p1	TRINITY_DN1811_c0_g1_i1.p1	TRINITY_DN30013_c0_g1_i9.p1	TRINITY_DN70043_c0_g1_i1.p1	TRINITY_DN2115_c0_g1_i1.p2
83164at6656	TRUE	38	95	FBpp0078624	TRINITY_DN12995_c0_g2_i2.p1	TRINITY_DN35287_c0_g1_i1.p1	TRINITY_DN44323_c0_g1_i1.p1	c89533_g2_i7.p1	SMAR002899-PA	TRINITY_DN22538_c1_g2_i4.p1	TRINITY_DN22199_c1_g1_i1.p1	TRINITY_DN1443_c0_g1_i1.p1	TRINITY_DN6700_c0_g1_i3.p1	TRINITY_DN3179_c0_g1_i25.p1	TRINITY_DN1118_c0_g1_i1.p1	TRINITY_DN822_c0_g1_i1.p1		TRINITY_DN1030_c0_g1_i1.p1	TRINITY_DN83048_c0_g1_i1.p1	TRINITY_DN24875_c0_g1_i1.p1	TRINITY_DN78832_c0_g1_i1.p1	TRINITY_DN86440_c0_g2_i1.p1		TRINITY_DN35525_c1_g1_i1.p1	TRINITY_DN8630_c0_g1_i1.p1	TRINITY_DN6801_c0_g1_i1.p1	TRINITY_DN3368_c0_g1_i1.p1	TRINITY_DN3107_c0_g1_i2.p1	TRINITY_DN51795_c0_g1_i2.p1	TRINITY_DN7370_c0_g1_i2.p1	TRINITY_DN4576_c0_g5_i3.p2	TRINITY_DN2706_c1_g1_i1.p1	TRINITY_DN8109_c0_g1_i2.p1	TRINITY_DN2385_c0_g1_i3.p1	TRINITY_DN27468_c0_g1_i1.p1	TRINITY_DN3902_c0_g1_i5.p1	TRINITY_DN23133_c0_g1_i1.p1	TRINITY_DN2151_c0_g1_i1.p1	TRINITY_DN4088_c0_g1_i3.p1	TRINITY_DN20818_c0_g1_i1.p1	TRINITY_DN25110_c0_g1_i1.p1	TRINITY_DN21961_c0_g1_i1.p1	TRINITY_DN12438_c5_g1_i1.p1
106988at6656	TRUE	38	95	FBpp0075560	TRINITY_DN6311_c0_g1_i1.p1	TRINITY_DN31057_c0_g1_i1.p1	TRINITY_DN108756_c0_g1_i1.p1	c92796_g1_i1.p3	SMAR013990-PA	TRINITY_DN27553_c1_g2_i3.p1	TRINITY_DN30831_c0_g1_i1.p1	TRINITY_DN39290_c0_g1_i1.p1	TRINITY_DN17251_c0_g1_i2.p1	TRINITY_DN12497_c0_g1_i1.p1	TRINITY_DN2504_c0_g1_i1.p1	TRINITY_DN2386_c0_g1_i2.p1	TRINITY_DN32394_c0_g1_i1.p1	TRINITY_DN2196_c0_g1_i2.p1	TRINITY_DN4120_c0_g1_i1.p1	TRINITY_DN22553_c0_g2_i2.p1	TRINITY_DN70844_c0_g1_i1.p1	TRINITY_DN84219_c0_g1_i1.p1			TRINITY_DN10384_c0_g2_i1.p1	TRINITY_DN6114_c0_g1_i4.p1	TRINITY_DN13694_c0_g1_i1.p1	TRINITY_DN9391_c0_g1_i1.p1	TRINITY_DN23654_c0_g1_i1.p1	TRINITY_DN15973_c0_g1_i2.p1	TRINITY_DN6065_c0_g1_i2.p1	TRINITY_DN10341_c0_g1_i1.p1	TRINITY_DN350_c0_g1_i6.p1	TRINITY_DN19517_c0_g1_i1.p1	TRINITY_DN8227_c0_g1_i1.p1	TRINITY_DN73314_c0_g1_i1.p1	TRINITY_DN2453_c0_g1_i3.p1	TRINITY_DN5122_c0_g1_i1.p1	TRINITY_DN2354_c0_g1_i2.p1	TRINITY_DN12826_c0_g1_i1.p1	TRINITY_DN30002_c0_g8_i4.p1	TRINITY_DN69478_c0_g1_i1.p1	TRINITY_DN3995_c0_g1_i1.p1
125716at6656	TRUE	38	95	FBpp0075751	TRINITY_DN11288_c0_g1_i1.p1	TRINITY_DN32033_c0_g2_i2.p1	TRINITY_DN49526_c0_g1_i1.p1	c92901_g1_i2.p1	SMAR007857-PA	TRINITY_DN24782_c0_g1_i1.p1	TRINITY_DN10208_c0_g1_i1.p1	TRINITY_DN17056_c0_g1_i1.p1	TRINITY_DN2056_c0_g1_i1.p1	TRINITY_DN18996_c0_g1_i2.p1	TRINITY_DN28250_c0_g1_i1.p1	TRINITY_DN7710_c0_g1_i1.p1	TRINITY_DN43500_c0_g1_i1.p1	TRINITY_DN23206_c0_g1_i2.p1	TRINITY_DN74214_c0_g1_i1.p1	TRINITY_DN33249_c7_g3_i1.p1	TRINITY_DN70772_c0_g1_i1.p1	TRINITY_DN86180_c0_g2_i5.p1			TRINITY_DN51668_c0_g1_i2.p1	TRINITY_DN23823_c0_g1_i1.p1	TRINITY_DN7629_c0_g1_i1.p1	TRINITY_DN13802_c0_g1_i1.p1	TRINITY_DN63528_c0_g1_i1.p1	TRINITY_DN27451_c0_g1_i2.p1	TRINITY_DN20382_c0_g1_i1.p1	TRINITY_DN11923_c0_g1_i1.p1	TRINITY_DN3904_c0_g1_i10.p2	TRINITY_DN14394_c0_g1_i1.p1	TRINITY_DN7789_c0_g1_i3.p1	TRINITY_DN11561_c0_g1_i1.p1	TRINITY_DN734_c0_g1_i13.p1	TRINITY_DN3659_c0_g2_i1.p1	TRINITY_DN6480_c0_g1_i1.p1	TRINITY_DN18834_c0_g2_i1.p1	TRINITY_DN28769_c0_g1_i2.p1	TRINITY_DN142254_c0_g1_i1.p1	TRINITY_DN13313_c5_g2_i1.p1
134673at6656	TRUE	38	95	FBpp0084839	TRINITY_DN8255_c0_g1_i1.p1	TRINITY_DN26466_c1_g1_i1.p2	TRINITY_DN45870_c0_g2_i1.p1	c93592_g1_i2.p1	SMAR013015-PA	TRINITY_DN41341_c0_g1_i1.p1	TRINITY_DN25951_c0_g2_i1.p1	TRINITY_DN1854_c0_g1_i5.p1	TRINITY_DN1120_c0_g1_i5.p1	TRINITY_DN4681_c0_g1_i2.p1	TRINITY_DN9485_c0_g1_i1.p1	TRINITY_DN7339_c0_g2_i1.p1	TRINITY_DN4181_c0_g1_i2.p1	TRINITY_DN4713_c0_g1_i3.p1	TRINITY_DN24487_c0_g1_i3.p1	TRINITY_DN33708_c0_g1_i16.p1	TRINITY_DN40047_c0_g1_i1.p1	TRINITY_DN78456_c1_g1_i1.p1			TRINITY_DN37266_c0_g1_i1.p1	TRINITY_DN2487_c0_g1_i1.p1	TRINITY_DN1163_c0_g1_i1.p1	TRINITY_DN3162_c0_g1_i12.p1	TRINITY_DN36248_c0_g1_i2.p1	TRINITY_DN11141_c0_g1_i9.p1	TRINITY_DN3476_c0_g1_i12.p1	TRINITY_DN3005_c0_g1_i2.p2	TRINITY_DN1373_c0_g1_i10.p3	TRINITY_DN33242_c0_g1_i2.p1	TRINITY_DN11623_c0_g1_i1.p1	TRINITY_DN1991_c0_g2_i1.p1	TRINITY_DN1739_c0_g1_i12.p2	TRINITY_DN6008_c0_g1_i1.p1	TRINITY_DN22431_c0_g1_i1.p1	TRINITY_DN7344_c0_g1_i1.p1	TRINITY_DN22833_c0_g1_i2.p1	TRINITY_DN59985_c0_g1_i1.p1	TRINITY_DN12732_c0_g1_i1.p1
15697at6656	TRUE	38	95	FBpp0307946	TRINITY_DN17489_c0_g1_i3.p1	TRINITY_DN32734_c0_g1_i1.p1	TRINITY_DN52058_c0_g1_i2.p1	c97233_g2_i1.p1	SMAR010386-PA	TRINITY_DN28761_c0_g2_i1.p1	TRINITY_DN41855_c0_g2_i2.p1	TRINITY_DN2713_c0_g1_i1.p1	TRINITY_DN2264_c0_g1_i7.p1	TRINITY_DN31794_c0_g1_i1.p1	TRINITY_DN3299_c0_g1_i1.p1	TRINITY_DN9733_c0_g1_i1.p1		TRINITY_DN12117_c0_g1_i1.p1	TRINITY_DN131_c0_g1_i1.p1	TRINITY_DN33653_c3_g12_i6.p1	TRINITY_DN50051_c0_g3_i1.p1	TRINITY_DN82873_c0_g1_i1.p1	TRINITY_DN66700_c0_g1_i1.p1		TRINITY_DN43319_c0_g1_i1.p1	TRINITY_DN13589_c0_g1_i1.p1	TRINITY_DN2397_c0_g3_i1.p1	TRINITY_DN35332_c0_g1_i1.p1	TRINITY_DN89845_c0_g1_i1.p1	TRINITY_DN2550_c0_g1_i5.p1	TRINITY_DN5505_c0_g1_i3.p1	TRINITY_DN5528_c0_g1_i5.p1	TRINITY_DN505_c2_g2_i6.p1	TRINITY_DN2906_c0_g1_i3.p1	TRINITY_DN2597_c0_g1_i1.p1	TRINITY_DN37418_c0_g1_i1.p1	TRINITY_DN5519_c0_g1_i2.p1	TRINITY_DN6913_c0_g1_i2.p1	TRINITY_DN22110_c0_g1_i2.p1	TRINITY_DN25019_c0_g7_i1.p1	TRINITY_DN29234_c0_g3_i1.p1	TRINITY_DN79848_c0_g2_i2.p1	TRINITY_DN12020_c2_g1_i1.p1
27515at6656	TRUE	38	95	FBpp0071123	TRINITY_DN9763_c0_g1_i1.p1	TRINITY_DN34583_c0_g1_i1.p1	TRINITY_DN37961_c0_g1_i1.p1	c98242_g1_i1.p1	SMAR007071-PA	TRINITY_DN24888_c0_g4_i1.p1	TRINITY_DN3170_c0_g1_i1.p1	TRINITY_DN2863_c0_g1_i1.p1	TRINITY_DN6304_c0_g1_i2.p1	TRINITY_DN957_c0_g1_i8.p1	TRINITY_DN13935_c0_g1_i1.p1	TRINITY_DN2666_c0_g1_i1.p1		TRINITY_DN17279_c0_g1_i1.p1	TRINITY_DN27116_c0_g2_i1.p1	TRINITY_DN28300_c0_g1_i3.p1	TRINITY_DN71938_c0_g1_i1.p1	TRINITY_DN84653_c0_g1_i1.p1	TRINITY_DN71157_c0_g1_i1.p1		TRINITY_DN4114_c0_g1_i1.p1	TRINITY_DN41675_c0_g1_i1.p1	TRINITY_DN24980_c0_g1_i1.p1	TRINITY_DN22544_c0_g1_i1.p1	TRINITY_DN36289_c0_g1_i1.p1	TRINITY_DN5593_c0_g1_i2.p1	TRINITY_DN2190_c0_g1_i1.p1	TRINITY_DN4009_c0_g1_i6.p1	TRINITY_DN1797_c0_g2_i1.p1	TRINITY_DN7864_c0_g1_i2.p1	TRINITY_DN22765_c0_g1_i1.p1	TRINITY_DN6462_c0_g1_i3.p1	TRINITY_DN6651_c0_g1_i6.p1	TRINITY_DN34905_c0_g1_i7.p1	TRINITY_DN26432_c0_g1_i1.p1	TRINITY_DN41989_c0_g1_i1.p1	TRINITY_DN22702_c0_g1_i1.p1	TRINITY_DN86437_c0_g1_i1.p1	TRINITY_DN9047_c0_g2_i1.p1
81703at6656	TRUE	38	95	FBpp0086535	TRINITY_DN17461_c0_g3_i1.p1	TRINITY_DN20237_c0_g1_i1.p1	TRINITY_DN50233_c0_g3_i2.p1	c98363_g7_i1.p1	SMAR010826-PA	TRINITY_DN26804_c1_g7_i7.p1	TRINITY_DN53583_c0_g1_i1.p1	TRINITY_DN5863_c0_g1_i2.p1	TRINITY_DN721_c0_g1_i3.p1	TRINITY_DN9019_c0_g1_i1.p1	TRINITY_DN18206_c0_g1_i1.p1	TRINITY_DN3681_c0_g1_i2.p1	TRINITY_DN5865_c0_g1_i1.p1	TRINITY_DN6042_c0_g1_i1.p1	TRINITY_DN43110_c0_g1_i1.p1	TRINITY_DN26199_c0_g1_i2.p1	TRINITY_DN66887_c1_g1_i1.p1	TRINITY_DN82926_c0_g2_i1.p1			TRINITY_DN21522_c0_g1_i1.p1	TRINITY_DN31521_c0_g1_i2.p1	TRINITY_DN3728_c0_g1_i1.p1	TRINITY_DN13537_c0_g1_i1.p1	TRINITY_DN1421_c0_g3_i3.p1	TRINITY_DN5265_c0_g1_i8.p1	TRINITY_DN7125_c2_g1_i6.p1	TRINITY_DN9562_c0_g1_i2.p1	TRINITY_DN35042_c0_g1_i1.p1	TRINITY_DN6950_c0_g1_i1.p1	TRINITY_DN32970_c0_g1_i1.p1	TRINITY_DN2325_c0_g1_i1.p1	TRINITY_DN1621_c0_g1_i3.p1	TRINITY_DN42812_c0_g1_i1.p1	TRINITY_DN18635_c0_g1_i1.p1	TRINITY_DN16525_c0_g1_i1.p1	TRINITY_DN30352_c2_g1_i2.p1	TRINITY_DN84439_c0_g2_i2.p1	TRINITY_DN5071_c0_g1_i1.p1
156975at6656	TRUE	38	95	FBpp0075932	TRINITY_DN14088_c0_g1_i1.p1	TRINITY_DN34586_c0_g1_i4.p2	TRINITY_DN51633_c0_g1_i2.p1	c72637_g1_i1.p1	SMAR014096-PA	TRINITY_DN14458_c0_g1_i1.p1	TRINITY_DN93001_c0_g1_i1.p1	TRINITY_DN43042_c0_g1_i1.p1	TRINITY_DN16458_c0_g1_i1.p1	TRINITY_DN9587_c0_g1_i1.p1	TRINITY_DN299_c0_g1_i13.p1	TRINITY_DN6929_c0_g1_i1.p1		TRINITY_DN27377_c0_g1_i1.p1	TRINITY_DN23478_c0_g1_i1.p1	TRINITY_DN56431_c0_g1_i1.p1	TRINITY_DN59325_c0_g3_i1.p1	TRINITY_DN28749_c0_g2_i1.p2		TRINITY_DN38654_c0_g1_i1.p1	TRINITY_DN1417_c0_g6_i1.p1	TRINITY_DN3871_c0_g1_i3.p1	TRINITY_DN2037_c0_g1_i5.p2	TRINITY_DN10735_c0_g1_i1.p1	TRINITY_DN30994_c0_g1_i6.p1	TRINITY_DN17501_c0_g1_i1.p1	TRINITY_DN3464_c0_g1_i1.p1	TRINITY_DN4473_c0_g1_i2.p1	TRINITY_DN1335_c0_g1_i17.p1	TRINITY_DN2314_c0_g1_i1.p1	TRINITY_DN2121_c0_g1_i3.p1	TRINITY_DN42662_c0_g1_i2.p1	TRINITY_DN3775_c0_g1_i10.p2	TRINITY_DN29209_c0_g1_i1.p1	TRINITY_DN18500_c0_g1_i1.p1	TRINITY_DN7333_c0_g1_i1.p1	TRINITY_DN31663_c0_g1_i13.p3	TRINITY_DN136734_c0_g1_i1.p1	TRINITY_DN13332_c6_g1_i1.p1
125127at6656	FALSE	35	87.5	FBpp0085690	TRINITY_DN7093_c0_g1_i1.p1	TRINITY_DN32722_c0_g1_i2.p2	TRINITY_DN48731_c0_g1_i1.p1	c66946_g1_i1.p1	SMAR003042-PA	TRINITY_DN24832_c0_g1_i1.p1	TRINITY_DN42282_c4_g3_i1.p1	TRINITY_DN2247_c0_g1_i2.p1	TRINITY_DN15759_c0_g1_i1.p1	TRINITY_DN25602_c0_g1_i1.p1	TRINITY_DN32542_c0_g1_i1.p1	TRINITY_DN3084_c0_g1_i2.p1		TRINITY_DN2083_c0_g1_i1.p1		TRINITY_DN32466_c1_g1_i1.p1		TRINITY_DN83268_c0_g1_i3.p2			TRINITY_DN751_c0_g2_i2.p1	TRINITY_DN2820_c0_g1_i2.p1	TRINITY_DN1173_c0_g1_i3.p1	TRINITY_DN1951_c0_g1_i1.p1	TRINITY_DN6986_c0_g1_i1.p1	TRINITY_DN30277_c0_g1_i1.p1	TRINITY_DN4316_c0_g3_i1.p1	TRINITY_DN36981_c0_g1_i1.p1	TRINITY_DN4732_c0_g1_i3.p1	TRINITY_DN24816_c0_g1_i1.p1	TRINITY_DN3120_c1_g1_i1.p1	TRINITY_DN271_c0_g1_i2.p1	TRINITY_DN1075_c0_g1_i1.p1	TRINITY_DN7492_c0_g1_i6.p1	TRINITY_DN22854_c0_g1_i1.p1	TRINITY_DN24320_c0_g3_i1.p1	TRINITY_DN25310_c0_g1_i1.p1	TRINITY_DN91405_c1_g1_i1.p1	TRINITY_DN12632_c0_g1_i1.p1
74692at6656	TRUE	38	95	FBpp0070795	TRINITY_DN10864_c0_g1_i1.p1	TRINITY_DN27217_c0_g1_i1.p1	TRINITY_DN51506_c0_g1_i3.p1	c94375_g1_i1.p1	SMAR008691-PA	TRINITY_DN24686_c0_g2_i1.p1	TRINITY_DN25833_c0_g1_i1.p1	TRINITY_DN1136_c0_g1_i7.p1	TRINITY_DN4875_c0_g1_i1.p1	TRINITY_DN7514_c0_g1_i2.p1	TRINITY_DN13052_c0_g1_i3.p1	TRINITY_DN4701_c0_g2_i3.p1	TRINITY_DN13633_c0_g1_i1.p1	TRINITY_DN4729_c0_g1_i3.p1	TRINITY_DN23213_c0_g2_i1.p1	TRINITY_DN32904_c2_g7_i2.p1	TRINITY_DN67994_c0_g1_i2.p1	TRINITY_DN84537_c0_g1_i4.p1			TRINITY_DN21979_c0_g1_i1.p1	TRINITY_DN30903_c0_g1_i1.p1	TRINITY_DN12571_c0_g1_i2.p1	TRINITY_DN1668_c0_g1_i1.p1	TRINITY_DN60751_c0_g1_i3.p1	TRINITY_DN3304_c0_g1_i3.p1	TRINITY_DN4960_c0_g1_i4.p1	TRINITY_DN8431_c0_g1_i1.p1	TRINITY_DN365_c1_g2_i2.p1	TRINITY_DN725_c0_g1_i1.p2	TRINITY_DN23353_c0_g1_i1.p1	TRINITY_DN3677_c0_g1_i2.p1	TRINITY_DN7808_c0_g1_i2.p1	TRINITY_DN539_c0_g1_i6.p2	TRINITY_DN3287_c0_g1_i1.p1	TRINITY_DN22918_c0_g1_i1.p1	TRINITY_DN29080_c1_g1_i1.p1	TRINITY_DN52229_c0_g1_i1.p1	TRINITY_DN13243_c3_g1_i1.p1
150251at6656	TRUE	38	95	FBpp0293261	TRINITY_DN14457_c0_g1_i1.p1	TRINITY_DN26491_c0_g1_i1.p1	TRINITY_DN50896_c0_g1_i1.p1	c92773_g1_i1.p1	SMAR004150-PA	TRINITY_DN21042_c0_g2_i2.p1	TRINITY_DN55505_c0_g1_i1.p1	TRINITY_DN15723_c0_g1_i24.p2	TRINITY_DN2018_c0_g1_i1.p1	TRINITY_DN26610_c0_g1_i1.p1	TRINITY_DN22078_c0_g1_i1.p1	TRINITY_DN1473_c0_g1_i2.p1	TRINITY_DN45907_c0_g1_i1.p1	TRINITY_DN31166_c0_g1_i1.p1	TRINITY_DN73404_c0_g1_i1.p1	TRINITY_DN22357_c0_g1_i1.p1	TRINITY_DN72525_c0_g2_i1.p1	TRINITY_DN81987_c0_g1_i1.p1			TRINITY_DN2901_c0_g1_i2.p1	TRINITY_DN40118_c0_g1_i1.p1	TRINITY_DN5616_c0_g2_i3.p1	TRINITY_DN667_c0_g1_i5.p1	TRINITY_DN12998_c0_g1_i2.p1	TRINITY_DN7977_c0_g1_i1.p1	TRINITY_DN8862_c0_g1_i3.p2	TRINITY_DN6764_c0_g1_i3.p1	TRINITY_DN4916_c0_g1_i4.p2	TRINITY_DN5242_c0_g1_i2.p1	TRINITY_DN32347_c0_g1_i1.p1	TRINITY_DN3576_c0_g1_i1.p1	TRINITY_DN1374_c0_g1_i1.p2	TRINITY_DN4012_c0_g1_i2.p1	TRINITY_DN4877_c0_g1_i1.p2	TRINITY_DN44584_c0_g1_i1.p1	TRINITY_DN26498_c0_g1_i2.p1	TRINITY_DN12381_c0_g1_i1.p1	TRINITY_DN15535_c0_g1_i1.p1
124452at6656	TRUE	38	95	FBpp0085453	TRINITY_DN53900_c0_g1_i1.p1	TRINITY_DN19620_c0_g1_i1.p2	TRINITY_DN50524_c0_g1_i1.p1	c88655_g2_i1.p1	SMAR010686-PA	TRINITY_DN25200_c0_g1_i1.p1	TRINITY_DN39037_c0_g1_i1.p1	TRINITY_DN44363_c0_g1_i1.p1	TRINITY_DN3441_c0_g1_i4.p1	TRINITY_DN16155_c0_g1_i1.p1	TRINITY_DN33007_c0_g1_i1.p1	TRINITY_DN12212_c0_g1_i1.p1	TRINITY_DN19601_c0_g1_i1.p1	TRINITY_DN842_c0_g1_i5.p1	TRINITY_DN17407_c0_g1_i1.p1	TRINITY_DN17878_c0_g2_i1.p1	TRINITY_DN101352_c0_g1_i1.p1	TRINITY_DN29421_c0_g1_i1.p1	TRINITY_DN32461_c0_g2_i1.p1	TRINITY_DN38790_c0_g1_i1.p1	TRINITY_DN51434_c0_g1_i1.p1	TRINITY_DN4290_c0_g1_i1.p1	TRINITY_DN5705_c0_g1_i1.p1	TRINITY_DN7123_c0_g1_i1.p1			TRINITY_DN14276_c0_g1_i3.p1	TRINITY_DN8950_c0_g1_i1.p1	TRINITY_DN5671_c0_g1_i3.p1	TRINITY_DN2772_c0_g1_i1.p1	TRINITY_DN774_c0_g1_i1.p2	TRINITY_DN3568_c0_g1_i6.p1	TRINITY_DN1560_c0_g1_i34.p1	TRINITY_DN8401_c0_g1_i1.p1	TRINITY_DN2383_c0_g1_i2.p1	TRINITY_DN10630_c0_g1_i1.p1	TRINITY_DN31117_c1_g1_i1.p1	TRINITY_DN85860_c0_g1_i1.p1	TRINITY_DN13101_c18_g1_i1.p1
74655at6656	TRUE	38	95	FBpp0077447	TRINITY_DN17798_c0_g1_i1.p1	TRINITY_DN34397_c0_g1_i1.p4	TRINITY_DN41532_c0_g1_i1.p1	c92056_g1_i2.p1	SMAR010868-PA	TRINITY_DN22766_c0_g1_i1.p1	TRINITY_DN29184_c0_g1_i1.p1	TRINITY_DN25349_c0_g1_i2.p1	TRINITY_DN26154_c0_g1_i5.p1	TRINITY_DN26810_c0_g1_i1.p1	TRINITY_DN8552_c0_g1_i1.p1	TRINITY_DN40884_c0_g1_i1.p1	TRINITY_DN43507_c0_g1_i1.p1	TRINITY_DN22628_c0_g1_i1.p1	TRINITY_DN10862_c0_g1_i1.p1	TRINITY_DN31956_c1_g2_i3.p1		TRINITY_DN82713_c0_g1_i3.p1	TRINITY_DN4783_c0_g1_i1.p1		TRINITY_DN20118_c0_g1_i1.p1	TRINITY_DN11154_c0_g1_i1.p1	TRINITY_DN330_c1_g1_i1.p1	TRINITY_DN29250_c0_g1_i1.p1	TRINITY_DN50406_c0_g1_i1.p1	TRINITY_DN9094_c0_g1_i1.p1	TRINITY_DN11933_c0_g1_i1.p1	TRINITY_DN9267_c0_g1_i5.p1	TRINITY_DN4963_c0_g1_i3.p1	TRINITY_DN17963_c0_g1_i1.p1	TRINITY_DN5202_c0_g1_i1.p2	TRINITY_DN45828_c0_g1_i1.p1	TRINITY_DN4356_c0_g1_i3.p1	TRINITY_DN3801_c0_g2_i2.p1	TRINITY_DN19524_c0_g1_i1.p1	TRINITY_DN12152_c0_g1_i1.p1	TRINITY_DN21609_c0_g6_i1.p1	TRINITY_DN64179_c0_g1_i1.p1	TRINITY_DN15754_c0_g1_i1.p1
111236at6656	TRUE	37	92.5	FBpp0084464	TRINITY_DN25329_c0_g1_i1.p1	TRINITY_DN9937_c0_g1_i1.p1	TRINITY_DN49394_c0_g1_i1.p1	c78457_g1_i1.p1	SMAR012293-PA	TRINITY_DN16752_c0_g2_i1.p1	TRINITY_DN32646_c2_g1_i1.p1	TRINITY_DN7477_c0_g1_i1.p1	TRINITY_DN642_c0_g1_i1.p1	TRINITY_DN3413_c0_g1_i4.p1	TRINITY_DN366_c0_g1_i2.p1	TRINITY_DN1061_c0_g1_i1.p1		TRINITY_DN3156_c0_g1_i2.p1		TRINITY_DN15887_c0_g1_i1.p1	TRINITY_DN69673_c0_g1_i1.p1	TRINITY_DN84788_c0_g2_i1.p1	TRINITY_DN38289_c0_g2_i1.p1		TRINITY_DN6108_c0_g1_i1.p1	TRINITY_DN751_c0_g1_i1.p1	TRINITY_DN45_c0_g1_i4.p1	TRINITY_DN5867_c0_g1_i2.p1	TRINITY_DN233_c0_g1_i3.p1	TRINITY_DN2301_c0_g1_i1.p1	TRINITY_DN483_c0_g2_i3.p1	TRINITY_DN3284_c0_g2_i7.p1	TRINITY_DN5240_c0_g1_i2.p1	TRINITY_DN1267_c0_g1_i1.p1	TRINITY_DN1077_c0_g1_i1.p1	TRINITY_DN11478_c0_g1_i6.p1	TRINITY_DN7174_c0_g3_i1.p1	TRINITY_DN1572_c0_g1_i5.p1	TRINITY_DN493_c0_g1_i4.p1	TRINITY_DN19738_c0_g1_i1.p1	TRINITY_DN24296_c0_g2_i1.p1	TRINITY_DN90573_c0_g1_i5.p1	TRINITY_DN8946_c0_g1_i1.p1
162594at6656	TRUE	37	92.5	FBpp0078662	TRINITY_DN45692_c0_g2_i1.p1	TRINITY_DN22640_c0_g1_i1.p2	TRINITY_DN45008_c0_g1_i1.p1	c61427_g1_i1.p2	SMAR003948-PA		TRINITY_DN39265_c0_g1_i1.p1	TRINITY_DN1974_c0_g1_i1.p2	TRINITY_DN7646_c0_g1_i17.p5	TRINITY_DN565_c0_g1_i1.p1	TRINITY_DN9975_c0_g1_i1.p1	TRINITY_DN969_c0_g1_i1.p1	TRINITY_DN4965_c0_g1_i2.p1	TRINITY_DN13761_c0_g1_i1.p1	TRINITY_DN28064_c0_g1_i1.p1	TRINITY_DN22225_c0_g3_i1.p1	TRINITY_DN74875_c0_g1_i1.p1	TRINITY_DN111501_c0_g2_i1.p1		TRINITY_DN37434_c0_g1_i1.p1	TRINITY_DN2635_c0_g1_i1.p1	TRINITY_DN31892_c0_g1_i1.p1	TRINITY_DN22968_c0_g1_i1.p2	TRINITY_DN17714_c0_g1_i1.p1	TRINITY_DN3706_c0_g1_i1.p1	TRINITY_DN43083_c0_g1_i1.p1	TRINITY_DN1028_c0_g1_i1.p1	TRINITY_DN707_c0_g1_i1.p1	TRINITY_DN1414_c0_g1_i8.p2	TRINITY_DN397_c0_g1_i3.p1	TRINITY_DN28_c0_g1_i1.p2	TRINITY_DN1135_c0_g1_i7.p1	TRINITY_DN26457_c0_g1_i1.p2	TRINITY_DN4646_c0_g1_i1.p1	TRINITY_DN3046_c0_g1_i1.p2	TRINITY_DN41627_c0_g1_i1.p1	TRINITY_DN24852_c0_g1_i1.p1		TRINITY_DN16140_c0_g1_i1.p2
16630at6656	TRUE	37	92.5	FBpp0078372	TRINITY_DN16655_c0_g1_i1.p1	TRINITY_DN33114_c0_g3_i2.p1	TRINITY_DN53263_c0_g1_i1.p2	c98359_g1_i1.p1	SMAR011959-PA	TRINITY_DN27982_c0_g1_i4.p1	TRINITY_DN43142_c1_g1_i1.p1	TRINITY_DN273_c2_g1_i4.p1	TRINITY_DN6548_c0_g1_i6.p1	TRINITY_DN21293_c0_g1_i1.p1	TRINITY_DN4863_c0_g1_i1.p1	TRINITY_DN21999_c0_g1_i1.p1		TRINITY_DN14187_c0_g1_i1.p1	TRINITY_DN16989_c0_g1_i1.p1	TRINITY_DN22708_c0_g1_i1.p1	TRINITY_DN63769_c0_g1_i1.p1	TRINITY_DN84936_c0_g1_i2.p1			TRINITY_DN2916_c0_g1_i4.p1	TRINITY_DN6671_c0_g1_i1.p1	TRINITY_DN5536_c0_g1_i2.p1	TRINITY_DN10546_c0_g1_i2.p1	TRINITY_DN39107_c0_g1_i1.p1	TRINITY_DN50974_c0_g1_i2.p1	TRINITY_DN3855_c1_g1_i6.p1	TRINITY_DN6200_c0_g1_i1.p1	TRINITY_DN3346_c0_g1_i18.p1	TRINITY_DN1337_c0_g1_i2.p2	TRINITY_DN23209_c0_g1_i1.p1	TRINITY_DN25530_c0_g1_i1.p1	TRINITY_DN6547_c0_g1_i1.p1	TRINITY_DN35906_c0_g1_i1.p1	TRINITY_DN27656_c0_g1_i1.p1	TRINITY_DN22071_c0_g2_i1.p1	TRINITY_DN28458_c0_g1_i1.p1	TRINITY_DN89485_c12_g1_i1.p1	TRINITY_DN10377_c0_g2_i1.p1
61612at6656	TRUE	37	92.5	FBpp0082817	TRINITY_DN15497_c0_g1_i1.p1	TRINITY_DN26901_c0_g1_i1.p1	TRINITY_DN52448_c1_g5_i1.p1	c22929_g1_i1.p1	SMAR014474-PA	TRINITY_DN27755_c0_g2_i1.p1	TRINITY_DN40180_c0_g2_i1.p1	TRINITY_DN1328_c0_g1_i1.p1	TRINITY_DN1319_c0_g1_i5.p1	TRINITY_DN7195_c0_g1_i2.p1	TRINITY_DN3020_c0_g1_i4.p1	TRINITY_DN16952_c0_g1_i1.p1	TRINITY_DN40010_c0_g1_i1.p2	TRINITY_DN8679_c1_g2_i1.p1	TRINITY_DN80174_c0_g1_i1.p1	TRINITY_DN33588_c1_g1_i7.p1		TRINITY_DN66730_c0_g2_i1.p1			TRINITY_DN7660_c0_g1_i3.p1	TRINITY_DN46093_c0_g1_i1.p1	TRINITY_DN6754_c0_g1_i2.p1	TRINITY_DN13875_c0_g1_i1.p1	TRINITY_DN42622_c0_g1_i2.p1	TRINITY_DN60775_c0_g1_i4.p1	TRINITY_DN7209_c0_g1_i1.p1	TRINITY_DN35408_c0_g1_i2.p1	TRINITY_DN3774_c0_g1_i51.p1	TRINITY_DN32534_c0_g1_i1.p1	TRINITY_DN6396_c0_g1_i2.p1	TRINITY_DN18548_c0_g1_i2.p1	TRINITY_DN842_c0_g2_i1.p1	TRINITY_DN5017_c0_g1_i9.p1	TRINITY_DN17758_c0_g1_i1.p1	TRINITY_DN24709_c0_g2_i3.p1	TRINITY_DN29741_c0_g2_i5.p1	TRINITY_DN80083_c0_g1_i2.p1	TRINITY_DN10902_c0_g1_i1.p1
105364at6656	TRUE	37	92.5	FBpp0074288	TRINITY_DN12820_c0_g1_i1.p1	TRINITY_DN32781_c0_g2_i1.p1	TRINITY_DN46808_c1_g1_i2.p1	c90236_g1_i2.p1	SMAR001258-PA	TRINITY_DN19916_c0_g1_i1.p1	TRINITY_DN125846_c0_g1_i1.p1	TRINITY_DN6755_c0_g1_i3.p1	TRINITY_DN4520_c0_g1_i4.p1	TRINITY_DN27240_c0_g1_i1.p1	TRINITY_DN32264_c0_g1_i1.p1	TRINITY_DN3649_c0_g1_i2.p1	TRINITY_DN44057_c0_g1_i1.p1	TRINITY_DN1137_c0_g1_i1.p1	TRINITY_DN30044_c0_g1_i1.p1	TRINITY_DN32641_c10_g7_i11.p2		TRINITY_DN71563_c0_g1_i1.p1	TRINITY_DN39162_c0_g3_i1.p1		TRINITY_DN4663_c0_g1_i1.p1	TRINITY_DN11177_c0_g1_i1.p1	TRINITY_DN24489_c0_g1_i1.p1	TRINITY_DN37369_c0_g1_i1.p1	TRINITY_DN73970_c0_g1_i1.p1	TRINITY_DN2120_c0_g1_i1.p1	TRINITY_DN1122_c0_g1_i7.p1	TRINITY_DN8308_c0_g1_i1.p1	TRINITY_DN172_c0_g1_i1.p1	TRINITY_DN4586_c0_g1_i3.p1	TRINITY_DN14799_c0_g1_i1.p1	TRINITY_DN10061_c1_g3_i3.p1	TRINITY_DN26289_c0_g1_i1.p1	TRINITY_DN6508_c0_g1_i2.p1	TRINITY_DN5438_c0_g1_i1.p1		TRINITY_DN27611_c0_g3_i2.p1	TRINITY_DN78486_c0_g2_i2.p1	TRINITY_DN13180_c0_g2_i1.p1
115841at6656	TRUE	37	92.5	FBpp0085660	TRINITY_DN65522_c0_g2_i1.p1	TRINITY_DN33250_c0_g1_i1.p2	TRINITY_DN50087_c0_g1_i1.p1	c98867_g1_i2.p1	SMAR009265-PA	TRINITY_DN27309_c0_g3_i3.p1	TRINITY_DN38723_c0_g1_i1.p1	TRINITY_DN4514_c0_g1_i1.p1	TRINITY_DN8671_c0_g1_i1.p1	TRINITY_DN16895_c0_g1_i1.p1	TRINITY_DN896_c0_g1_i1.p2	TRINITY_DN2061_c0_g1_i2.p2		TRINITY_DN31113_c0_g1_i1.p1	TRINITY_DN29088_c0_g1_i5.p1	TRINITY_DN14372_c0_g2_i1.p1	TRINITY_DN13205_c0_g1_i1.p1	TRINITY_DN56577_c0_g1_i1.p1			TRINITY_DN94_c1_g1_i2.p1	TRINITY_DN4281_c0_g1_i1.p1	TRINITY_DN7962_c0_g1_i1.p1	TRINITY_DN1597_c0_g1_i1.p1	TRINITY_DN1113_c0_g1_i2.p1	TRINITY_DN4590_c0_g1_i1.p1	TRINITY_DN11541_c0_g1_i7.p2	TRINITY_DN3537_c0_g1_i1.p1	TRINITY_DN1276_c0_g1_i4.p2	TRINITY_DN15194_c0_g1_i1.p1	TRINITY_DN2832_c0_g1_i1.p2	TRINITY_DN87168_c0_g1_i1.p1	TRINITY_DN11453_c0_g1_i1.p1	TRINITY_DN29748_c0_g1_i2.p1	TRINITY_DN13906_c0_g1_i1.p1	TRINITY_DN25169_c0_g2_i1.p1	TRINITY_DN27852_c0_g1_i2.p1	TRINITY_DN70431_c0_g1_i1.p1	TRINITY_DN12614_c2_g1_i1.p1
118780at6656	TRUE	37	92.5	FBpp0082525	TRINITY_DN16989_c0_g2_i1.p1	TRINITY_DN25183_c0_g1_i1.p1	TRINITY_DN50992_c0_g2_i1.p1	c101146_g1_i6.p3	SMAR013069-PA	TRINITY_DN21998_c0_g1_i1.p1	TRINITY_DN20895_c0_g1_i1.p1	TRINITY_DN17605_c0_g1_i2.p1	TRINITY_DN1015_c0_g1_i13.p2	TRINITY_DN15835_c0_g1_i1.p1	TRINITY_DN22364_c0_g1_i2.p1	TRINITY_DN11347_c0_g1_i2.p1	TRINITY_DN36287_c0_g1_i1.p1	TRINITY_DN4794_c2_g2_i1.p1	TRINITY_DN3569_c0_g1_i1.p1	TRINITY_DN30628_c9_g2_i2.p2		TRINITY_DN74128_c0_g2_i1.p1			TRINITY_DN9550_c0_g1_i2.p1	TRINITY_DN580_c0_g1_i2.p1	TRINITY_DN691_c0_g1_i19.p2	TRINITY_DN4004_c0_g1_i2.p2	TRINITY_DN2446_c0_g1_i1.p1	TRINITY_DN2061_c0_g2_i3.p1	TRINITY_DN533_c0_g1_i23.p1	TRINITY_DN5971_c0_g1_i3.p1	TRINITY_DN1286_c0_g1_i23.p1	TRINITY_DN1873_c1_g1_i5.p2	TRINITY_DN4241_c0_g1_i1.p1	TRINITY_DN14384_c0_g1_i2.p1	TRINITY_DN7947_c0_g1_i1.p1	TRINITY_DN5767_c0_g1_i16.p3	TRINITY_DN13749_c0_g1_i1.p1	TRINITY_DN14897_c0_g1_i1.p1	TRINITY_DN21411_c0_g1_i1.p1	TRINITY_DN75104_c0_g1_i1.p1	TRINITY_DN11126_c1_g1_i1.p1
143709at6656	FALSE	36	90	FBpp0076849	TRINITY_DN593_c0_g1_i1.p1	TRINITY_DN34408_c0_g1_i1.p2	TRINITY_DN46486_c0_g1_i1.p1	c80384_g1_i1.p1	SMAR010610-PA		TRINITY_DN21169_c0_g1_i1.p1	TRINITY_DN8356_c0_g1_i2.p1	TRINITY_DN5499_c0_g1_i2.p1	TRINITY_DN8402_c0_g1_i1.p1	TRINITY_DN4345_c0_g1_i2.p1	TRINITY_DN3550_c0_g1_i1.p1	TRINITY_DN6979_c0_g1_i1.p1	TRINITY_DN8090_c0_g1_i1.p1	TRINITY_DN12923_c0_g1_i1.p1	TRINITY_DN33179_c1_g5_i5.p1	TRINITY_DN69578_c0_g1_i1.p1	TRINITY_DN83089_c0_g1_i1.p1	TRINITY_DN46384_c0_g2_i1.p2		TRINITY_DN3955_c3_g1_i2.p1	TRINITY_DN42218_c0_g1_i1.p1	TRINITY_DN6077_c0_g1_i2.p1	TRINITY_DN13842_c0_g1_i3.p1			TRINITY_DN4580_c0_g1_i3.p1	TRINITY_DN10095_c0_g1_i1.p1	TRINITY_DN10955_c0_g1_i1.p1	TRINITY_DN19432_c0_g1_i1.p1	TRINITY_DN27654_c0_g1_i1.p1	TRINITY_DN2824_c0_g1_i1.p1	TRINITY_DN1017_c0_g1_i2.p2	TRINITY_DN2431_c1_g1_i5.p1	TRINITY_DN19093_c0_g1_i1.p1	TRINITY_DN40189_c0_g1_i1.p1	TRINITY_DN19787_c0_g1_i1.p1	TRINITY_DN86821_c1_g1_i1.p1	TRINITY_DN1894_c0_g1_i1.p1
120047at6656	TRUE	37	92.5	FBpp0288673	TRINITY_DN33634_c0_g1_i1.p1	TRINITY_DN33660_c2_g1_i3.p1	TRINITY_DN45507_c0_g1_i1.p1	c82486_g2_i2.p1	SMAR008240-PA	TRINITY_DN20900_c0_g1_i1.p1	TRINITY_DN50339_c0_g1_i1.p1	TRINITY_DN4855_c0_g2_i7.p1	TRINITY_DN4308_c0_g1_i9.p1	TRINITY_DN2699_c0_g1_i1.p1	TRINITY_DN18796_c0_g1_i1.p1	TRINITY_DN10657_c0_g1_i1.p1	TRINITY_DN23191_c0_g1_i1.p1	TRINITY_DN305_c1_g1_i2.p2	TRINITY_DN29934_c0_g1_i1.p1	TRINITY_DN32718_c8_g4_i4.p1	TRINITY_DN54577_c0_g1_i1.p1	TRINITY_DN79828_c0_g1_i1.p1			TRINITY_DN2329_c0_g2_i1.p1	TRINITY_DN34171_c0_g1_i1.p1	TRINITY_DN5900_c0_g1_i2.p1	TRINITY_DN19986_c0_g1_i1.p2		TRINITY_DN15031_c0_g1_i1.p1	TRINITY_DN4759_c0_g1_i4.p1	TRINITY_DN15375_c0_g1_i6.p1	TRINITY_DN302_c1_g2_i1.p1	TRINITY_DN3800_c0_g1_i3.p1	TRINITY_DN5148_c0_g1_i6.p1	TRINITY_DN5303_c0_g2_i6.p1	TRINITY_DN5962_c0_g1_i1.p1	TRINITY_DN3950_c0_g1_i1.p1	TRINITY_DN18961_c0_g1_i1.p1	TRINITY_DN19917_c0_g1_i1.p1	TRINITY_DN23139_c0_g2_i1.p1	TRINITY_DN139149_c0_g1_i1.p1	TRINITY_DN13368_c11_g1_i1.p1
125210at6656	TRUE	37	92.5	FBpp0086402	TRINITY_DN76804_c0_g1_i1.p1	TRINITY_DN31921_c0_g1_i1.p2	TRINITY_DN50761_c1_g1_i2.p2	c78252_g1_i2.p1	SMAR005443-PA	TRINITY_DN28600_c1_g3_i1.p1	TRINITY_DN28188_c0_g1_i1.p1	TRINITY_DN19361_c0_g1_i2.p1	TRINITY_DN10134_c0_g1_i1.p1	TRINITY_DN1213_c0_g1_i1.p1	TRINITY_DN23045_c0_g1_i1.p1	TRINITY_DN10078_c0_g1_i1.p1	TRINITY_DN46430_c0_g1_i1.p1	TRINITY_DN11431_c0_g1_i1.p1		TRINITY_DN138_c0_g1_i1.p1	TRINITY_DN65834_c0_g1_i1.p1	TRINITY_DN63497_c0_g1_i1.p1			TRINITY_DN37156_c0_g1_i1.p1	TRINITY_DN2430_c0_g1_i2.p1	TRINITY_DN1930_c0_g1_i10.p2	TRINITY_DN35026_c0_g1_i1.p1	TRINITY_DN25425_c0_g1_i2.p1	TRINITY_DN43309_c0_g1_i1.p1	TRINITY_DN37928_c0_g1_i1.p1	TRINITY_DN13977_c0_g1_i1.p1	TRINITY_DN7512_c0_g1_i1.p1	TRINITY_DN13150_c0_g1_i2.p1	TRINITY_DN789_c0_g1_i1.p2	TRINITY_DN8587_c0_g1_i1.p1	TRINITY_DN86_c0_g1_i18.p3	TRINITY_DN5454_c0_g1_i1.p1	TRINITY_DN80_c0_g1_i1.p1	TRINITY_DN23528_c0_g3_i1.p1	TRINITY_DN22377_c1_g1_i1.p1	TRINITY_DN81043_c0_g1_i1.p1	TRINITY_DN13206_c2_g1_i1.p1
127775at6656	TRUE	37	92.5	FBpp0071993	TRINITY_DN10270_c0_g1_i1.p1	TRINITY_DN27555_c0_g1_i1.p3	TRINITY_DN52473_c0_g1_i1.p2	c151470_g1_i1.p1	SMAR003301-PA	TRINITY_DN23414_c0_g1_i1.p1	TRINITY_DN49766_c0_g1_i1.p1	TRINITY_DN146_c0_g1_i11.p2	TRINITY_DN3464_c0_g1_i1.p1	TRINITY_DN1810_c0_g1_i1.p2	TRINITY_DN17462_c0_g1_i1.p1	TRINITY_DN5710_c0_g1_i2.p3	TRINITY_DN7300_c1_g1_i1.p1	TRINITY_DN26404_c0_g1_i1.p1	TRINITY_DN14548_c0_g1_i1.p1	TRINITY_DN25823_c0_g1_i1.p2	TRINITY_DN113720_c0_g1_i1.p1	TRINITY_DN81254_c0_g1_i1.p1			TRINITY_DN37131_c0_g1_i3.p1	TRINITY_DN1386_c0_g2_i1.p1	TRINITY_DN2417_c0_g1_i4.p1	TRINITY_DN781_c0_g1_i1.p1	TRINITY_DN8964_c1_g2_i1.p1	TRINITY_DN43987_c0_g1_i3.p1	TRINITY_DN10635_c0_g1_i10.p1	TRINITY_DN5541_c0_g1_i2.p1	TRINITY_DN4004_c0_g1_i11.p1	TRINITY_DN12069_c0_g1_i1.p1	TRINITY_DN4953_c0_g1_i5.p2	TRINITY_DN774_c0_g1_i12.p1	TRINITY_DN3796_c0_g1_i23.p1	TRINITY_DN5780_c0_g1_i2.p1	TRINITY_DN15108_c0_g1_i1.p1	TRINITY_DN45145_c0_g1_i1.p1	TRINITY_DN10478_c0_g1_i2.p1		TRINITY_DN11220_c0_g1_i1.p1
133422at6656	TRUE	37	92.5	FBpp0082298	TRINITY_DN41919_c0_g1_i1.p1	TRINITY_DN33652_c0_g1_i1.p2	TRINITY_DN39227_c0_g1_i1.p1	c72131_g1_i1.p1		TRINITY_DN23933_c0_g3_i1.p1	TRINITY_DN36072_c0_g1_i1.p1	TRINITY_DN19820_c0_g1_i1.p1	TRINITY_DN4469_c2_g1_i1.p1	TRINITY_DN21068_c0_g1_i1.p1	TRINITY_DN684_c1_g1_i1.p1	TRINITY_DN2353_c0_g1_i2.p1	TRINITY_DN4788_c0_g1_i1.p1	TRINITY_DN27448_c0_g1_i1.p1	TRINITY_DN26674_c0_g4_i1.p1	TRINITY_DN33718_c1_g3_i1.p2	TRINITY_DN68792_c1_g1_i1.p1	TRINITY_DN96894_c0_g1_i1.p1			TRINITY_DN4441_c0_g1_i2.p1	TRINITY_DN6399_c0_g1_i4.p1	TRINITY_DN16987_c0_g1_i1.p1	TRINITY_DN3995_c0_g1_i2.p1	TRINITY_DN36806_c0_g1_i2.p1	TRINITY_DN987_c0_g1_i1.p1	TRINITY_DN3594_c0_g1_i1.p1	TRINITY_DN1329_c0_g1_i1.p1	TRINITY_DN344_c0_g1_i9.p3	TRINITY_DN573_c0_g1_i3.p1	TRINITY_DN617_c0_g1_i19.p2	TRINITY_DN13239_c0_g1_i3.p1	TRINITY_DN22322_c0_g1_i1.p1	TRINITY_DN12544_c0_g1_i8.p1	TRINITY_DN1509_c0_g1_i2.p1	TRINITY_DN13495_c0_g1_i1.p1	TRINITY_DN28356_c0_g2_i2.p1	TRINITY_DN34167_c0_g1_i1.p1	TRINITY_DN12900_c0_g1_i1.p1
135065at6656	TRUE	37	92.5	FBpp0078086	TRINITY_DN10198_c0_g1_i1.p1	TRINITY_DN29850_c0_g5_i3.p1	TRINITY_DN49710_c0_g2_i1.p1	c91750_g3_i1.p9		TRINITY_DN11935_c0_g1_i1.p1	TRINITY_DN29151_c0_g2_i1.p1	TRINITY_DN3411_c0_g1_i12.p1	TRINITY_DN1216_c0_g1_i4.p2	TRINITY_DN1166_c0_g2_i4.p1	TRINITY_DN3637_c0_g1_i6.p3	TRINITY_DN1395_c1_g1_i2.p2	TRINITY_DN22873_c0_g1_i1.p2	TRINITY_DN277_c0_g1_i4.p1	TRINITY_DN23960_c0_g1_i1.p1	TRINITY_DN28318_c0_g3_i2.p1		TRINITY_DN72761_c0_g1_i1.p1	TRINITY_DN45439_c0_g1_i1.p1		TRINITY_DN257_c0_g1_i3.p1	TRINITY_DN8255_c2_g1_i6.p1	TRINITY_DN3536_c0_g1_i10.p1	TRINITY_DN2116_c0_g1_i1.p1	TRINITY_DN7720_c0_g1_i1.p1	TRINITY_DN20695_c0_g1_i1.p1	TRINITY_DN364_c0_g1_i11.p1	TRINITY_DN2600_c0_g1_i4.p2	TRINITY_DN814_c0_g1_i11.p3	TRINITY_DN299_c0_g1_i6.p1	TRINITY_DN1654_c0_g1_i6.p1	TRINITY_DN2112_c0_g1_i10.p1	TRINITY_DN1136_c0_g1_i1.p1	TRINITY_DN558_c0_g1_i3.p1	TRINITY_DN229_c0_g1_i1.p2	TRINITY_DN14060_c0_g1_i1.p1	TRINITY_DN23179_c0_g1_i1.p1	TRINITY_DN59993_c0_g2_i2.p1	TRINITY_DN7939_c0_g1_i1.p1
135834at6656	TRUE	37	92.5	FBpp0073316	TRINITY_DN78295_c0_g1_i1.p1	TRINITY_DN19742_c0_g1_i1.p2	TRINITY_DN52218_c0_g1_i1.p3	c78972_g1_i1.p1	SMAR002866-PA	TRINITY_DN21199_c0_g1_i1.p1	TRINITY_DN39712_c1_g1_i1.p1	TRINITY_DN4710_c0_g1_i1.p2	TRINITY_DN5267_c0_g1_i10.p2	TRINITY_DN23481_c0_g1_i1.p1	TRINITY_DN22135_c0_g1_i1.p1	TRINITY_DN1635_c0_g1_i1.p1		TRINITY_DN26237_c0_g1_i1.p1	TRINITY_DN27833_c0_g1_i1.p1	TRINITY_DN29538_c0_g1_i1.p1	TRINITY_DN73368_c1_g1_i2.p2	TRINITY_DN95788_c0_g2_i1.p1	TRINITY_DN41969_c0_g1_i1.p1		TRINITY_DN27278_c0_g2_i1.p1	TRINITY_DN759_c0_g1_i9.p1	TRINITY_DN3132_c0_g1_i1.p1	TRINITY_DN991_c2_g2_i1.p1	TRINITY_DN2828_c0_g1_i1.p1	TRINITY_DN21101_c0_g1_i2.p1	TRINITY_DN1512_c0_g1_i1.p1	TRINITY_DN6214_c0_g1_i5.p1	TRINITY_DN1622_c0_g1_i1.p1	TRINITY_DN765_c0_g1_i10.p2	TRINITY_DN32541_c0_g1_i1.p1	TRINITY_DN1251_c0_g1_i8.p1		TRINITY_DN9304_c0_g1_i1.p1	TRINITY_DN615_c0_g1_i1.p2	TRINITY_DN18481_c0_g1_i1.p1	TRINITY_DN21302_c0_g2_i1.p4	TRINITY_DN80442_c2_g2_i1.p1	TRINITY_DN15513_c0_g1_i1.p1
141804at6656	TRUE	37	92.5	FBpp0085119	TRINITY_DN56787_c0_g1_i1.p1	TRINITY_DN26334_c0_g1_i1.p1	TRINITY_DN51220_c0_g2_i1.p1	c167292_g1_i1.p1	SMAR007550-PA	TRINITY_DN21940_c0_g1_i1.p1	TRINITY_DN30230_c0_g1_i1.p1	TRINITY_DN3228_c0_g1_i1.p1	TRINITY_DN6604_c0_g1_i2.p1	TRINITY_DN21258_c0_g1_i2.p1	TRINITY_DN3111_c0_g1_i1.p1	TRINITY_DN6319_c0_g1_i1.p1	TRINITY_DN29762_c0_g1_i1.p1	TRINITY_DN2066_c0_g1_i1.p1		TRINITY_DN26279_c1_g1_i7.p1	TRINITY_DN61537_c0_g1_i1.p1	TRINITY_DN78696_c0_g1_i1.p1			TRINITY_DN32533_c0_g1_i1.p1	TRINITY_DN4468_c0_g1_i1.p1	TRINITY_DN10233_c0_g1_i1.p1	TRINITY_DN22721_c0_g1_i1.p1	TRINITY_DN25559_c0_g1_i3.p1	TRINITY_DN2506_c0_g1_i3.p1	TRINITY_DN7567_c0_g1_i4.p2	TRINITY_DN3730_c0_g1_i2.p1	TRINITY_DN2493_c0_g1_i1.p2	TRINITY_DN10214_c0_g1_i2.p1	TRINITY_DN3090_c0_g1_i1.p1	TRINITY_DN1580_c0_g1_i3.p1	TRINITY_DN4452_c0_g1_i1.p1	TRINITY_DN3547_c0_g1_i3.p1	TRINITY_DN2988_c0_g2_i4.p1	TRINITY_DN17420_c0_g1_i1.p1	TRINITY_DN29571_c3_g4_i1.p1	TRINITY_DN59615_c0_g1_i1.p1	TRINITY_DN3180_c0_g1_i1.p1
142613at6656	TRUE	37	92.5	FBpp0312547	TRINITY_DN8375_c0_g1_i3.p1	TRINITY_DN28450_c0_g1_i2.p2	TRINITY_DN48380_c0_g1_i4.p1	c98465_g1_i1.p2		TRINITY_DN21014_c0_g1_i1.p1	TRINITY_DN32813_c0_g2_i2.p1	TRINITY_DN785_c0_g1_i2.p1	TRINITY_DN326_c0_g2_i1.p1	TRINITY_DN18_c0_g1_i2.p1	TRINITY_DN9809_c0_g1_i2.p1	TRINITY_DN2197_c0_g1_i1.p1	TRINITY_DN467_c0_g1_i2.p1	TRINITY_DN829_c0_g1_i2.p1	TRINITY_DN32177_c2_g2_i1.p1	TRINITY_DN28599_c0_g1_i2.p1	TRINITY_DN67930_c0_g2_i1.p1	TRINITY_DN124234_c0_g1_i1.p1			TRINITY_DN2891_c3_g1_i1.p1	TRINITY_DN1942_c0_g1_i3.p1	TRINITY_DN1302_c0_g1_i1.p1	TRINITY_DN3293_c0_g1_i1.p1	TRINITY_DN5581_c0_g1_i1.p1	TRINITY_DN9103_c0_g1_i1.p1	TRINITY_DN469_c0_g3_i1.p1	TRINITY_DN63_c0_g1_i3.p1	TRINITY_DN1693_c0_g1_i3.p1	TRINITY_DN539_c0_g1_i5.p1	TRINITY_DN27_c0_g1_i2.p1	TRINITY_DN1282_c0_g1_i2.p1	TRINITY_DN73_c0_g1_i3.p1	TRINITY_DN2917_c0_g1_i8.p1	TRINITY_DN1208_c0_g1_i1.p1	TRINITY_DN23345_c0_g1_i3.p1	TRINITY_DN6597_c0_g2_i1.p1	TRINITY_DN86900_c0_g2_i1.p1	TRINITY_DN13657_c0_g1_i1.p1
147025at6656	TRUE	37	92.5	FBpp0078856	TRINITY_DN25598_c0_g1_i1.p1	TRINITY_DN34030_c0_g2_i1.p2	TRINITY_DN53123_c0_g1_i5.p1	c87666_g1_i2.p1	SMAR011163-PA	TRINITY_DN43723_c0_g1_i1.p1	TRINITY_DN28117_c0_g1_i1.p1	TRINITY_DN9526_c0_g1_i1.p1	TRINITY_DN2371_c0_g1_i2.p1	TRINITY_DN1888_c0_g1_i2.p1	TRINITY_DN2199_c0_g1_i1.p2	TRINITY_DN7547_c0_g1_i15.p2	TRINITY_DN29541_c0_g1_i1.p1	TRINITY_DN857_c0_g1_i7.p2		TRINITY_DN14621_c0_g2_i1.p1		TRINITY_DN11522_c0_g1_i1.p1	TRINITY_DN88787_c0_g1_i1.p1		TRINITY_DN742_c1_g4_i1.p1	TRINITY_DN5950_c0_g1_i1.p1	TRINITY_DN9051_c0_g1_i1.p2	TRINITY_DN815_c1_g1_i1.p1	TRINITY_DN64486_c0_g1_i1.p1	TRINITY_DN9002_c0_g1_i1.p1	TRINITY_DN8699_c0_g1_i18.p1	TRINITY_DN3285_c0_g1_i2.p1	TRINITY_DN12176_c0_g1_i134.p3	TRINITY_DN908_c1_g1_i1.p1	TRINITY_DN2589_c0_g1_i3.p1	TRINITY_DN9775_c0_g1_i3.p1	TRINITY_DN9660_c0_g1_i2.p2	TRINITY_DN2922_c1_g1_i1.p1	TRINITY_DN28280_c0_g1_i1.p1	TRINITY_DN25702_c2_g1_i1.p1	TRINITY_DN19162_c0_g2_i1.p1	TRINITY_DN87858_c0_g1_i1.p1	TRINITY_DN16484_c0_g1_i1.p1
152032at6656	TRUE	37	92.5	FBpp0076589	TRINITY_DN20000_c0_g1_i1.p1	TRINITY_DN55710_c0_g1_i1.p1	TRINITY_DN42061_c0_g1_i1.p1	c96728_g1_i3.p2	SMAR007104-PA	TRINITY_DN18970_c0_g1_i3.p1		TRINITY_DN47569_c0_g1_i1.p1	TRINITY_DN4809_c0_g2_i2.p1	TRINITY_DN25563_c0_g1_i1.p1	TRINITY_DN3335_c0_g1_i5.p1	TRINITY_DN10940_c0_g2_i1.p1	TRINITY_DN8078_c1_g1_i7.p1	TRINITY_DN26407_c0_g1_i1.p1	TRINITY_DN27091_c0_g1_i1.p1	TRINITY_DN30307_c0_g4_i1.p3	TRINITY_DN68297_c2_g1_i1.p1	TRINITY_DN83946_c1_g1_i2.p1			TRINITY_DN19863_c0_g1_i3.p1	TRINITY_DN4162_c0_g1_i1.p1	TRINITY_DN1055_c0_g1_i2.p1	TRINITY_DN167_c1_g1_i1.p1	TRINITY_DN2002_c0_g3_i1.p1	TRINITY_DN340_c0_g1_i1.p1	TRINITY_DN885_c0_g3_i3.p1	TRINITY_DN5220_c0_g1_i1.p1	TRINITY_DN4342_c0_g1_i10.p3	TRINITY_DN2711_c0_g1_i2.p1	TRINITY_DN786_c0_g2_i5.p1	TRINITY_DN2731_c0_g1_i1.p1	TRINITY_DN1154_c0_g3_i1.p1	TRINITY_DN2379_c0_g1_i2.p1	TRINITY_DN14246_c0_g1_i2.p1	TRINITY_DN4989_c0_g1_i1.p1	TRINITY_DN31876_c0_g3_i1.p1	TRINITY_DN89705_c4_g3_i1.p1	TRINITY_DN13005_c0_g1_i1.p2
[truncated: 637 more rows]
