# Supplementary material for: Reinvestigating the phylogeny of Myriapoda with more extensive taxon sampling and novel genetic perspective
Source: PeerJ. 2021 Dec 23;9:e12691. doi: 10.7717/peerj.12691 (PMC8710254; doi:10.7717/peerj.12691)
Supplement: Supplemental Information 2 [file peerj-09-12691-s002.xls]

## Sheet: Sheet1
LITgene	Clade	Sequence	Method	Ka	Ks	Ka/Ks	P-Value(Fisher)	Length	S-Sites	N-Sites	Fold-Sites(0:2:4)	Substitutions	S-Substitutions	N-Substitutions	Fold-S-Substitutions(0:2:4)	Fold-N-Substitutions(0:2:4)	Divergence-Time	Substitution-Rate-Ratio(rTC:rAG:rTA:rCG:rTG:rCA/rCA)	GC(1:2:3)	ML-Score	AICc	Akaike-Weight	Model
ABCA4	CHI&CHI	Spe01|Spe41	GMYN	0.566926	4.84648	0.116977	4.03e-105	2916	640.323	2275.68	NA	1439	549.622	889.378	NA	NA	1.50667	0.877777:1.60456:1:1:1:1	0.46142(0.485597:0.359568:0.539095)	NA	NA	NA	NA
ABCA4	CHI&CHI	Spe03|Spe35	GMYN	0.635018	4.78512	0.132707	1.21e-81	2682	590.022	2091.98	NA	1380	500.14	879.86	NA	NA	1.54801	1.28142:1.64685:1:1:1:1	0.390194(0.447427:0.361298:0.361857)	NA	NA	NA	NA
ABCA4	DIP&DIP	Spe14|Spe16	GMYN	0.628838	3.88646	0.161802	1.47e-27	834	178.029	655.971	NA	427	152.824	274.176	NA	NA	1.32422	1.61294:2.05279:1:1:1:1	0.40048(0.480216:0.388489:0.332734)	NA	NA	NA	NA
ABCA4	DIP&DIP	Spe14|Spe49	GMYN	0.87036	3.91979	0.222042	1.92e-15	792	186.12	605.88	NA	458	152.588	305.412	NA	NA	1.58698	1.53203:1.71141:1:1:1:1	0.436237(0.547348:0.395833:0.36553)	NA	NA	NA	NA
ABCA4	CHI&DIP	Spe05|Spe47	GMYN	0.327229	3.01832	0.108414	0	303	55.9486	247.051	NA	125	60.1021	64.8979	NA	NA	0.824136	1.1665:2.2485:1:1:1:1	0.508251(0.455446:0.366337:0.70297)	NA	NA	NA	NA
ABCA4	CHI&CHI	Spe31|Spe34	GMYN	0.735067	4.74832	0.154806	3.26e-44	2334	561.771	1772.23	NA	1258	442.19	815.81	NA	NA	1.70102	1.21812:1.48917:1:1:1:1	0.467224(0.485861:0.378535:0.537275)	NA	NA	NA	NA
ABCA4	DIP&DIP	Spe14|Spe42	GMYN	0.942856	3.93508	0.239603	2.34e-10	777	189.952	587.048	NA	455	147.782	307.218	NA	NA	1.67436	1.2056:2.35841:1:1:1:1	0.465894(0.509653:0.407336:0.480695)	NA	NA	NA	NA
ABCA4	CHI&SYM	Spe05|Spe08	GMYN	0.660474	4.92884	0.134002	1.66e-102	3099	714.646	2384.35	NA	1643	618.096	1024.9	NA	NA	1.64478	0.871293:2.05378:1:1:1:1	0.445628(0.466118:0.366893:0.503872)	NA	NA	NA	NA
ABCA4	CHI&DIP	Spe39|Spe42	GMYN	0.84669	4.54798	0.186168	6.05e-21	1746	430.081	1315.92	NA	980	323.879	656.121	NA	NA	1.75841	1.2987:2.03279:1:1:1:1	0.49685(0.505155:0.390034:0.595361)	NA	NA	NA	NA
ABCA4	CHI&CHI	Spe31|Spe41	GMYN	0.689693	4.6934	0.146949	2.41e-55	2238	522.104	1715.9	NA	1189	428.117	760.883	NA	NA	1.62372	1.36705:1.52844:1:1:1:1	0.472744(0.470509:0.373324:0.574397)	NA	NA	NA	NA
ABCA4	SYM&DIP	Spe07|Spe13	GMYN	1.05321	3.65378	0.288251	1.32e-07	564	130.543	433.457	NA	343	104.132	238.868	NA	NA	1.65513	0.97724:1.55047:1:1:1:1	0.481383(0.518617:0.404255:0.521277)	NA	NA	NA	NA
ABCA4	CHI&CHI	Spe02|Spe34	GMYN	0.802933	4.77078	0.168302	7.85e-35	2451	578.845	1872.16	NA	1350	444.654	905.346	NA	NA	1.74001	1.16856:1.53887:1:1:1:1	0.444512(0.45716:0.352509:0.523868)	NA	NA	NA	NA
ABCA4	CHI&SYM	Spe41|Spe52	GMYN	0.625506	4.8317	0.129459	2.39e-113	2889	627.831	2261.17	NA	1507	563.201	943.799	NA	NA	1.53959	1.13666:1.73422:1:1:1:1	0.496712(0.49325:0.373832:0.623053)	NA	NA	NA	NA
ABCA4	CHI&CHI	Spe34|Spe37	GMYN	0.36728	4.16107	0.0882656	4.2e-77	1104	256.748	847.252	NA	477	234.411	242.589	NA	NA	1.24957	1.00575:1.69197:1:1:1:1	0.462409(0.533967:0.387228:0.466033)	NA	NA	NA	NA
ABCA4	SYM&SYM	Spe07|Spe09	GMYN	0.371319	3.72083	0.0997947	7.53e-37	627	142.752	484.248	NA	264	124.035	139.965	NA	NA	1.13392	1.03894:1.49123:1:1:1:1	0.489633(0.492823:0.42823:0.547847)	NA	NA	NA	NA
ABCA4	DIP&CHI	Spe16|Spe31	GMYN	0.478835	4.72319	0.10138	3.06e-111	2379	543.257	1835.74	NA	1113	474.384	638.616	NA	NA	1.44806	1.21004:2.22786:1:1:1:1	0.419084(0.465952:0.364439:0.42686)	NA	NA	NA	NA
ABCA4	SYM&CHI	Spe08|Spe39	GMYN	0.939828	4.70207	0.199875	3.38e-39	2358	528.177	1829.82	NA	1394	437.106	956.894	NA	NA	1.78255	0.92653:1.31322:1:1:1:1	0.479008(0.49173:0.384224:0.561069)	NA	NA	NA	NA
ABCA4	SYM&DIP	Spe07|Spe11	GMYN	0.822514	3.73497	0.22022	2.34e-11	627	145.469	481.531	NA	352	115.845	236.155	NA	NA	1.49823	1.17588:1.39415:1:1:1:1	0.470494(0.490431:0.413876:0.507177)	NA	NA	NA	NA
ABCA4	CHI&CHI	Spe32|Spe33	GMYN	0.226725	4.84373	0.0468078	8.95e-159	2529	637.981	1891.02	NA	865	498.55	366.45	NA	NA	1.39144	1.91073:2.542:1:1:1:1	0.432582(0.469158:0.346382:0.482206)	NA	NA	NA	NA
ABCA4	CHI&DIP	Spe37|Spe44	GMYN	0.494377	4.14749	0.119199	1.43e-39	1092	252.14	839.86	NA	506	206.295	299.705	NA	NA	1.33787	1.56864:1.59395:1:1:1:1	0.429029(0.513736:0.372253:0.401099)	NA	NA	NA	NA
ABCA4	DIP&CHI	Spe17|Spe32	GMYN	0.760834	4.80507	0.15834	2.99e-36	2499	605.93	1893.07	NA	1348	458.299	889.701	NA	NA	1.74144	1.48362:1.43534:1:1:1:1	0.431973(0.481993:0.358944:0.454982)	NA	NA	NA	NA
ABCA4	CHI&CHI	Spe02|Spe05	GMYN	0.627156	4.74293	0.13223	5.31e-57	2442	557.746	1884.25	NA	1224	440.363	783.637	NA	NA	1.56719	0.925026:1.80521:1:1:1:1	0.415233(0.452088:0.337838:0.455774)	NA	NA	NA	NA
ABCA4	CHI&DIP	Spe34|Spe46	GMYN	0.6919	4.68625	0.147645	6.39e-77	2370	517.147	1852.85	NA	1279	455.146	823.854	NA	NA	1.56349	1.35081:1.86141:1:1:1:1	0.518143(0.506329:0.374684:0.673418)	NA	NA	NA	NA
ABCA4	DIP&PAU	Spe11|Spe51	GMYN	0.709121	5.27136	0.134524	7.09e-111	4854	1128.31	3725.69	NA	2601	921.746	1679.25	NA	NA	1.76961	1.26355:1.59136:1:1:1:1	0.439431(0.478677:0.368047:0.47157)	NA	NA	NA	NA
ABCA4	SYM&CHI	Spe09|Spe35	GMYN	0.69997	4.87927	0.143458	1.05e-66	2790	668.941	2121.06	NA	1494	545.82	948.18	NA	NA	1.70202	1.32885:1.64041:1:1:1:1	0.428495(0.463978:0.375806:0.445699)	NA	NA	NA	NA
ABCA4	PAU&CHI	Spe10|Spe35	GMYN	0.402645	5.01148	0.0803445	6.17e-193	3426	797.892	2628.11	NA	1511	703.491	807.509	NA	NA	1.47601	0.968598:1.7257:1:1:1:1	0.453006(0.479422:0.391856:0.487741)	NA	NA	NA	NA
ABCA4	CHI&SYM	Spe32|Spe52	GMYN	0.701941	4.76639	0.147269	1.03e-71	2496	575.472	1920.53	NA	1350	490.93	859.07	NA	NA	1.63903	1.09451:1.42891:1:1:1:1	0.456731(0.492788:0.366587:0.510817)	NA	NA	NA	NA
ABCA4	DIP&DIP	Spe11|Spe47	GMYN	0.303005	3.14061	0.0964795	6.79e-29	303	65.8567	237.143	NA	122	63.501	58.499	NA	NA	0.919755	2.40692:2.59156:1:1:1:1	0.491749(0.465347:0.341584:0.668317)	NA	NA	NA	NA
ABCA4	CHI&CHI	Spe01|Spe02	GMYN	0.776031	4.74795	0.163445	3.96e-36	2370	561.493	1808.51	NA	1289	431.768	857.232	NA	NA	1.71705	1.21174:1.70801:1:1:1:1	0.432278(0.470253:0.343038:0.483544)	NA	NA	NA	NA
ABCA4	CHI&DIP	Spe04|Spe50	GMYN	0.67124	5.02995	0.133449	4.15e-70	3348	817.789	2530.21	NA	1746	640.748	1105.25	NA	NA	1.73591	1.57314:1.63523:1:1:1:1	0.485812(0.501344:0.385753:0.570341)	NA	NA	NA	NA
ABCA4	DIP&DIP	Spe17|Spe50	GMYN	0.700834	5.27771	0.132791	1.14e-96	4887	1137.91	3749.09	NA	2579	899.944	1679.06	NA	NA	1.76653	1.27124:1.72622:1:1:1:1	0.471353(0.486188:0.36771:0.56016)	NA	NA	NA	NA
ABCA4	CHI&PAU	Spe02|Spe10	GMYN	0.821517	4.78923	0.171534	4.89e-43	2481	593.265	1887.74	NA	1399	474.771	924.229	NA	NA	1.77029	1.15436:1.75192:1:1:1:1	0.458081(0.468561:0.356711:0.548972)	NA	NA	NA	NA
ABCA4	SYM&DIP	Spe08|Spe46	GMYN	0.652389	4.17699	0.156187	7.27e-62	1278	262.256	1015.74	NA	684	249.417	434.583	NA	NA	1.37567	0.847587:2.01195:1:1:1:1	0.532081(0.512911:0.408451:0.674883)	NA	NA	NA	NA
ABCA4	SYM&DIP	Spe08|Spe49	GMYN	1.08406	4.47574	0.242209	3.1e-14	1596	390.59	1205.41	NA	979	301.75	677.25	NA	NA	1.91411	1.28509:1.34451:1:1:1:1	0.462406(0.50188:0.387218:0.49812)	NA	NA	NA	NA
ABCA4	DIP&CHI	Spe12|Spe41	GMYN	1.0147	3.43335	0.295542	1.3e-09	1164	297.079	866.921	NA	694	220.519	473.481	NA	NA	1.63199	2.01317:1.48014:1:1:1:1	0.467354(0.506443:0.384021:0.511598)	NA	NA	NA	NA
ABCA4	CHI&CHI	Spe05|Spe37	GMYN	0.352148	4.10683	0.0857469	1.02e-66	1080	238.834	841.166	NA	443	210.205	232.795	NA	NA	1.18247	0.900453:1.93828:1:1:1:1	0.44213(0.506944:0.368056:0.451389)	NA	NA	NA	NA
ABCA4	DIP&DIP	Spe11|Spe46	GMYN	0.349919	4.85588	0.072061	2.88e-205	2751	648.397	2102.6	NA	1180	599.245	580.755	NA	NA	1.41195	1.5706:2.20526:1:1:1:1	0.500545(0.508179:0.391494:0.601963)	NA	NA	NA	NA
ABCA4	DIP&CHI	Spe14|Spe31	GMYN	0.83866	3.72879	0.224915	3.91e-18	672	144.275	527.725	NA	385	126.046	258.954	NA	NA	1.45916	0.7857:2.02885:1:1:1:1	0.445685(0.522321:0.379464:0.435268)	NA	NA	NA	NA
ABCA4	CHI&CHI	Spe35|Spe36	GMYN	0.626101	4.78827	0.130757	4.54e-87	2640	592.507	2047.49	NA	1363	508.966	854.034	NA	NA	1.56024	1.13442:1.52045:1:1:1:1	0.419129(0.453977:0.364773:0.438636)	NA	NA	NA	NA
ABCA4	SYM&CHI	Spe08|Spe40	GMYN	0.993568	4.45118	0.223214	2.55e-29	1611	378.004	1233	NA	982	319.373	662.627	NA	NA	1.80486	0.951757:1.65429:1:1:1:1	0.45748(0.495345:0.402235:0.47486)	NA	NA	NA	NA
ABCA4	SYM&SYM	Spe07|Spe08	GMYN	0.600435	3.67681	0.163303	2.14e-16	618	134.614	483.386	NA	304	107.617	196.383	NA	NA	1.27054	0.972733:1.41985:1:1:1:1	0.503236(0.492718:0.419903:0.597087)	NA	NA	NA	NA
ABCA4	DIP&DIP	Spe16|Spe43	GMYN	0.347535	5.43112	0.0639895	0	5937	1396.18	4540.82	NA	2470	1223.01	1246.99	NA	NA	1.54302	1.36204:2.22901:1:1:1:1	0.435321(0.468924:0.368368:0.468671)	NA	NA	NA	NA
ABCA4	DIP&CHI	Spe15|Spe35	GMYN	0.964378	4.54316	0.21227	1.57e-35	2097	427.324	1669.68	NA	1238	359.768	878.232	NA	NA	1.69366	0.927011:1.61648:1:1:1:1	0.389604(0.453505:0.367668:0.347639)	NA	NA	NA	NA
ABCA4	CHI&CHI	Spe39|Spe41	GMYN	0.800347	4.24246	0.188652	1.07e-21	1311	286.179	1024.82	NA	720	226.236	493.764	NA	NA	1.55173	1.02769:1.2261:1:1:1:1	0.489703(0.497712:0.394737:0.576659)	NA	NA	NA	NA
ABCA4	CHI&CHI	Spe02|Spe40	GMYN	0.880118	4.0667	0.216421	5.12e-17	954	226.393	727.607	NA	553	183.784	369.216	NA	NA	1.63632	1.40648:1.25123:1:1:1:1	0.427673(0.506289:0.366352:0.410377)	NA	NA	NA	NA
ABCA4	CHI&DIP	Spe41|Spe43	GMYN	0.634144	4.83872	0.131056	1.87e-99	2874	633.729	2240.27	NA	1497	553.357	943.643	NA	NA	1.56127	1.18832:1.67058:1:1:1:1	0.475122(0.47547:0.370042:0.579854)	NA	NA	NA	NA
ABCA4	CHI&CHI	Spe01|Spe31	GMYN	0.690176	4.76333	0.144894	7.25e-47	2376	573.125	1802.88	NA	1247	446.84	800.16	NA	NA	1.67268	1.32199:1.63902:1:1:1:1	0.454756(0.48548:0.375:0.503788)	NA	NA	NA	NA
ABCA4	DIP&CHI	Spe12|Spe36	GMYN	0.940582	4.09255	0.229828	9.05e-12	987	234.329	752.671	NA	575	180.464	394.536	NA	NA	1.68891	1.58137:1.65052:1:1:1:1	0.438703(0.519757:0.364742:0.431611)	NA	NA	NA	NA
ABCA4	CHI&CHI	Spe35|Spe41	GMYN	0.62352	4.87435	0.127918	7.87e-66	2811	664.569	2146.43	NA	1418	523.698	894.302	NA	NA	1.62849	1.45567:1.59071:1:1:1:1	0.434365(0.455176:0.357524:0.490395)	NA	NA	NA	NA
ABCA4	SYM&CHI	Spe09|Spe32	GMYN	0.620241	4.75558	0.130424	7.34e-89	2514	567.237	1946.76	NA	1299	492.86	806.14	NA	NA	1.5533	1.02878:1.76733:1:1:1:1	0.422434(0.463007:0.369928:0.434368)	NA	NA	NA	NA
ABCA4	DIP&SYM	Spe42|Spe52	GMYN	1.00582	4.55778	0.220682	3.73e-18	1782	435.74	1346.26	NA	1069	336.472	732.528	NA	NA	1.87436	1.33309:1.66093:1:1:1:1	0.513187(0.511785:0.40404:0.623737)	NA	NA	NA	NA
ABCA4	SYM&DIP	Spe09|Spe45	GMYN	0.669863	5.1604	0.129808	9.66e-100	3972	973.149	2998.85	NA	2099	791.974	1307.03	NA	NA	1.77006	1.24712:1.57905:1:1:1:1	0.458837(0.493958:0.386707:0.495846)	NA	NA	NA	NA
ABCA4	CHI&DIP	Spe39|Spe48	GMYN	0.925757	4.7579	0.194572	2.76e-30	2499	568.995	1930.01	NA	1444	443.837	1000.16	NA	NA	1.79829	1.09398:1.40862:1:1:1:1	0.433373(0.459784:0.378752:0.461585)	NA	NA	NA	NA
ABCA4	DIP&CHI	Spe15|Spe36	GMYN	0.978937	4.57289	0.214074	1.63e-29	1977	444.608	1532.39	NA	1183	364.911	818.089	NA	NA	1.78718	1.01686:1.36825:1:1:1:1	0.426404(0.491654:0.369499:0.418058)	NA	NA	NA	NA
ABCA4	DIP&DIP	Spe16|Spe48	GMYN	0.0469026	0.995644	0.0471078	1.38e-258	5448	1170.2	4277.8	NA	754	559.984	194.016	NA	NA	0.250687	1.70103:2.39198:1:1:1:1	0.372155(0.425385:0.356002:0.335077)	NA	NA	NA	NA
ABCA4	DIP&DIP	Spe13|Spe43	GMYN	0.627023	4.88007	0.128486	1.63e-84	2841	669.656	2171.34	NA	1465	557.951	907.049	NA	NA	1.62952	1.14183:1.95607:1:1:1:1	0.465329(0.495776:0.395459:0.504752)	NA	NA	NA	NA
ABCA4	CHI&CHI	Spe33|Spe38	GMYN	0.38304	4.6702	0.0820178	2.2e-110	2166	506.203	1659.8	NA	919	427.389	491.611	NA	NA	1.38497	1.14764:1.75806:1:1:1:1	0.455448(0.487535:0.355956:0.522853)	NA	NA	NA	NA
ABCA4	CHI&SYM	Spe03|Spe08	GMYN	0.654187	4.84566	0.135005	7.82e-65	2724	639.621	2084.38	NA	1406	512.659	893.341	NA	NA	1.63838	1.09538:1.67319:1:1:1:1	0.428414(0.465859:0.369493:0.44989)	NA	NA	NA	NA
ABCA4	DIP&DIP	Spe12|Spe42	GMYN	1.08632	4.31141	0.251963	1.02e-22	1314	313.736	1000.26	NA	825	266.847	558.153	NA	NA	1.85635	0.729334:1.22899:1:1:1:1	0.461568(0.5:0.394977:0.489726)	NA	NA	NA	NA
ABCA4	CHI&PAU	Spe35|Spe51	GMYN	0.624585	4.8719	0.128201	1.93e-80	2769	662.4	2106.6	NA	1425	546.762	878.238	NA	NA	1.64063	1.54102:1.68414:1:1:1:1	0.425244(0.461538:0.35428:0.459913)	NA	NA	NA	NA
ABCA4	DIP&CHI	Spe12|Spe33	GMYN	0.912656	4.50715	0.202491	4.26e-28	1776	407.291	1368.71	NA	1034	329.63	704.37	NA	NA	1.73698	1.13918:2.17065:1:1:1:1	0.441723(0.453547:0.361486:0.510135)	NA	NA	NA	NA
ABCA4	CHI&DIP	Spe04|Spe16	GMYN	0.495758	5.06379	0.0979026	1.37e-167	3684	855.527	2828.47	NA	1755	746.513	1008.49	NA	NA	1.55658	1.26245:2.22159:1:1:1:1	0.42671(0.47272:0.378664:0.428746)	NA	NA	NA	NA
ABCA4	CHI&DIP	Spe04|Spe48	GMYN	0.507744	5.08811	0.0997904	4.1e-150	3693	883.722	2809.28	NA	1768	749.808	1018.19	NA	NA	1.60381	1.37033:2.35118:1:1:1:1	0.432846(0.472786:0.375711:0.450041)	NA	NA	NA	NA
ABCA4	SYM&CHI	Spe09|Spe31	GMYN	0.721573	4.73247	0.152473	1.81e-56	2310	550.024	1759.98	NA	1256	454.352	801.648	NA	NA	1.67659	1.16698:1.30103:1:1:1:1	0.458009(0.474675:0.383766:0.515584)	NA	NA	NA	NA
ABCA4	SYM&DIP	Spe08|Spe45	GMYN	0.647819	4.93449	0.131284	1.4e-65	2967	720.053	2246.95	NA	1522	564.302	957.698	NA	NA	1.68814	1.13861:1.92875:1:1:1:1	0.481631(0.510617:0.401921:0.532356)	NA	NA	NA	NA
ABCA4	DIP&CHI	Spe17|Spe39	GMYN	0.88955	4.76996	0.18649	1.27e-26	2448	578.216	1869.78	NA	1392	437.297	954.703	NA	NA	1.8061	1.33222:1.7212:1:1:1:1	0.468954(0.487745:0.365196:0.553922)	NA	NA	NA	NA
ABCA4	DIP&PAU	Spe45|Spe51	GMYN	0.692173	5.14827	0.134448	2e-101	3957	957.534	2999.47	NA	2124	790.844	1333.16	NA	NA	1.77048	1.23574:1.49271:1:1:1:1	0.463356(0.492418:0.375663:0.521986)	NA	NA	NA	NA
ABCA4	CHI&CHI	Spe04|Spe38	GMYN	0.745602	4.67759	0.159399	1.64e-40	2133	511.214	1621.79	NA	1158	404.939	753.061	NA	NA	1.68798	1.18377:1.67466:1:1:1:1	0.451477(0.490155:0.374121:0.490155)	NA	NA	NA	NA
ABCA4	CHI&PAU	Spe31|Spe51	GMYN	0.681713	4.75257	0.143441	1.93e-67	2379	564.966	1814.03	NA	1273	474.812	798.188	NA	NA	1.64846	1.16835:1.73329:1:1:1:1	0.466793(0.476671:0.383354:0.540353)	NA	NA	NA	NA
ABCA4	DIP&DIP	Spe11|Spe45	GMYN	0.0552834	1.42966	0.0386689	3.29e-295	4572	1110.6	3461.4	NA	819	635.06	183.94	NA	NA	0.389138	1.41406:2.18561:1:1:1:1	0.449584(0.49836:0.391076:0.459318)	NA	NA	NA	NA
ABCA4	DIP&CHI	Spe17|Spe36	GMYN	0.736236	4.83954	0.152129	5.39e-47	2649	634.425	2014.57	NA	1423	494.283	928.717	NA	NA	1.71896	1.48917:1.9305:1:1:1:1	0.450547(0.470555:0.370328:0.510759)	NA	NA	NA	NA
ABCA4	CHI&DIP	Spe36|Spe50	GMYN	0.436216	4.88502	0.0892966	7.45e-125	2850	674.086	2175.91	NA	1273	562.27	710.73	NA	NA	1.48845	1.43303:1.76773:1:1:1:1	0.465789(0.483684:0.375789:0.537895)	NA	NA	NA	NA
ABCA4	DIP&DIP	Spe13|Spe49	GMYN	1.15809	4.63965	0.249606	2.51e-20	2031	485.996	1545	NA	1278	388.801	889.199	NA	NA	1.99119	1.06563:1.30785:1:1:1:1	0.451502(0.522895:0.392171:0.439439)	NA	NA	NA	NA
ABCA4	CHI&DIP	Spe04|Spe49	GMYN	1.10021	2.62393	0.419296	5.46e-12	2250	552.449	1697.55	NA	1360	401.807	958.193	NA	NA	1.47433	1.20141:1.46844:1:1:1:1	0.461556(0.503333:0.403333:0.478)	NA	NA	NA	NA
ABCA4	DIP&DIP	Spe11|Spe49	GMYN	1.07953	4.69035	0.230159	3.28e-18	2214	519.988	1694.01	NA	1349	399.46	949.54	NA	NA	1.92758	1.27945:1.31404:1:1:1:1	0.432023(0.512873:0.385501:0.397696)	NA	NA	NA	NA
ABCA4	DIP&DIP	Spe14|Spe15	GMYN	1.13374	3.7182	0.304916	4.64e-19	714	142.252	571.748	NA	456	132.731	323.269	NA	NA	1.64865	0.795138:1.14872:1:1:1:1	0.420168(0.523109:0.363445:0.37395)	NA	NA	NA	NA
ABCA4	CHI&CHI	Spe02|Spe36	GMYN	0.694719	4.15766	0.167094	3.57e-33	1128	255.584	872.416	NA	605	217.569	387.431	NA	NA	1.47936	1.12904:1.72215:1:1:1:1	0.445922(0.488032:0.382979:0.466755)	NA	NA	NA	NA
ABCA4	CHI&DIP	Spe33|Spe50	GMYN	0.595271	5.24651	0.11346	4.3e-122	4827	1091.54	3735.46	NA	2382	871.24	1510.76	NA	NA	1.64707	1.199:1.58019:1:1:1:1	0.473482(0.472343:0.362337:0.585768)	NA	NA	NA	NA
ABCA4	CHI&DIP	Spe38|Spe48	GMYN	0.78878	4.64771	0.169714	5.46e-30	2112	491.247	1620.75	NA	1148	374.038	773.962	NA	NA	1.68636	1.25778:2.18197:1:1:1:1	0.413352(0.477983:0.348722:0.413352)	NA	NA	NA	NA
ABCA4	DIP&DIP	Spe42|Spe44	GMYN	1.04374	1.86981	0.558207	4.55e-07	1686	450.516	1235.48	NA	992	309.959	682.041	NA	NA	1.26448	1.68688:2.72081:1:1:1:1	0.482206(0.507117:0.406584:0.532918)	NA	NA	NA	NA
ABCA4	DIP&DIP	Spe46|Spe50	GMYN	0.675463	4.63862	0.145617	1.73e-80	2373	485.327	1887.67	NA	1261	433.004	827.996	NA	NA	1.48601	1.58336:1.82347:1:1:1:1	0.532659(0.5:0.383692:0.714286)	NA	NA	NA	NA
ABCA4	DIP&SYM	Spe46|Spe52	GMYN	0.559596	4.65855	0.120122	2.17e-118	2634	498.397	2135.6	NA	1290	461.606	828.394	NA	NA	1.33519	1.2947:2.31659:1:1:1:1	0.548405(0.52164:0.394647:0.728929)	NA	NA	NA	NA
ABCA4	CHI&SYM	Spe40|Spe52	GMYN	1.04809	4.61604	0.227053	3.46e-33	1959	470.934	1488.07	NA	1222	398.786	823.214	NA	NA	1.9058	1.28222:1.596:1:1:1:1	0.471159(0.517611:0.383614:0.512251)	NA	NA	NA	NA
ABCA4	DIP&SYM	Spe13|Spe52	GMYN	0.383325	4.92288	0.077866	2.79e-197	3018	708.985	2309.02	NA	1328	643.803	684.197	NA	NA	1.44975	1.03292:1.76072:1:1:1:1	0.490225(0.508449:0.404573:0.557654)	NA	NA	NA	NA
ABCA4	DIP&PAU	Spe47|Spe51	GMYN	0.77713	3.86421	0.20111	4.78e-05	303	67.2303	235.77	NA	162	50.131	111.869	NA	NA	1.4621	2.07782:0.858578:1:1:1:1	0.49835(0.420792:0.351485:0.722772)	NA	NA	NA	NA
ABCA4	CHI&DIP	Spe34|Spe42	GMYN	0.998366	4.50024	0.221847	1.62e-17	1680	403.559	1276.44	NA	1000	311.714	688.286	NA	NA	1.83956	1.00398:1.94967:1:1:1:1	0.484524(0.485714:0.382143:0.585714)	NA	NA	NA	NA
ABCA4	DIP&DIP	Spe13|Spe47	GMYN	0.708241	3.19822	0.221448	6.32e-08	303	71.1149	231.885	NA	162	57.4646	104.535	NA	NA	1.29265	2.38686:1.99721:1:1:1:1	0.5033(0.465347:0.351485:0.693069)	NA	NA	NA	NA
ABCA4	SYM&DIP	Spe09|Spe43	GMYN	0.741497	5.24235	0.141444	2.19e-98	4620	1085.5	3534.5	NA	2518	883.034	1634.97	NA	NA	1.79901	1.27533:1.95701:1:1:1:1	0.473485(0.485065:0.377597:0.557792)	NA	NA	NA	NA
ABCA4	DIP&CHI	Spe13|Spe40	GMYN	1.03319	4.60281	0.22447	3.79e-43	2109	462.701	1646.3	NA	1303	405.659	897.341	NA	NA	1.81634	0.793587:1.30259:1:1:1:1	0.439782(0.516358:0.404694:0.398293)	NA	NA	NA	NA
ABCA4	CHI&DIP	Spe35|Spe49	GMYN	1.09589	4.74225	0.231092	6.01e-18	2256	557.241	1698.76	NA	1385	426.163	958.837	NA	NA	1.99656	1.79779:1.76573:1:1:1:1	0.425089(0.491356:0.384309:0.399601)	NA	NA	NA	NA
ABCA4	CHI&DIP	Spe02|Spe11	GMYN	0.819595	4.77635	0.171594	3.96e-48	2466	583.165	1882.83	NA	1395	476.657	918.343	NA	NA	1.7553	1.16759:2.19166:1:1:1:1	0.431671(0.481144:0.360097:0.453771)	NA	NA	NA	NA
ABCA4	SYM&DIP	Spe07|Spe17	GMYN	0.792078	3.71442	0.213244	2.27e-16	627	141.537	485.463	NA	353	120.177	232.823	NA	NA	1.45176	1.23023:1.31153:1:1:1:1	0.464115(0.45933:0.389952:0.543062)	NA	NA	NA	NA
ABCA4	CHI&CHI	Spe36|Spe39	GMYN	0.855716	4.27514	0.200161	1.92e-24	1233	298.925	934.075	NA	713	245.965	467.035	NA	NA	1.68471	1.36173:1.51441:1:1:1:1	0.478913(0.530414:0.405109:0.501217)	NA	NA	NA	NA
ABCA4	CHI&DIP	Spe41|Spe50	GMYN	0.419355	4.87898	0.0859514	8.17e-170	3054	668.679	2385.32	NA	1356	599.978	756.022	NA	NA	1.3958	1.12778:1.9708:1:1:1:1	0.483955(0.480845:0.378684:0.592338)	NA	NA	NA	NA
ABCA4	CHI&CHI	Spe02|Spe39	GMYN	1.03316	4.63689	0.222813	9.45e-17	2070	484.208	1585.79	NA	1230	364.547	865.453	NA	NA	1.87613	0.986821:1.82006:1:1:1:1	0.457971(0.478986:0.356522:0.538406)	NA	NA	NA	NA
ABCA4	DIP&DIP	Spe15|Spe17	GMYN	1.18246	4.93697	0.239512	1.84e-39	3147	722.435	2424.56	NA	2003	602.571	1400.43	NA	NA	2.04436	1.00425:1.63448:1:1:1:1	0.432316(0.483794:0.379886:0.43327)	NA	NA	NA	NA
ABCA4	DIP&DIP	Spe44|Spe46	GMYN	0.349338	4.85712	0.0719228	2.59e-215	2730	649.476	2080.52	NA	1182	608.042	573.958	NA	NA	1.42175	1.62914:2.24862:1:1:1:1	0.50348(0.511538:0.392857:0.606044)	NA	NA	NA	NA
ABCA4	CHI&PAU	Spe01|Spe51	GMYN	0.632929	5.29772	0.119472	3.85e-115	4884	1168.68	3715.32	NA	2489	926.864	1562.14	NA	NA	1.74916	1.34495:1.9278:1:1:1:1	0.448301(0.471744:0.362715:0.510442)	NA	NA	NA	NA
ABCA4	PAU&DIP	Spe10|Spe44	GMYN	0.656119	5.36458	0.122306	3.9e-143	5352	1277.65	4074.35	NA	2804	1052.35	1751.65	NA	NA	1.78014	1.13853:1.62908:1:1:1:1	0.464406(0.502242:0.384249:0.506726)	NA	NA	NA	NA
ABCA4	CHI&SYM	Spe02|Spe09	GMYN	0.835644	2.89889	0.288263	1.02e-25	2418	604.985	1813.01	NA	1340	444.229	895.771	NA	NA	1.35187	1.56804:2.1511:1:1:1:1	0.432589(0.458437:0.359181:0.480149)	NA	NA	NA	NA
ABCA4	CHI&PAU	Spe04|Spe10	GMYN	0.600887	5.05585	0.11885	1.93e-124	3666	846.523	2819.48	NA	1866	721.373	1144.63	NA	NA	1.62959	0.928843:1.69351:1:1:1:1	0.489225(0.497136:0.400982:0.569558)	NA	NA	NA	NA
ABCA4	DIP&CHI	Spe13|Spe37	GMYN	0.603621	4.19588	0.14386	1.59e-36	1122	268.944	853.056	NA	570	223.946	346.054	NA	NA	1.46469	0.863229:2.16657:1:1:1:1	0.463458(0.530749:0.421123:0.438503)	NA	NA	NA	NA
ABCA4	CHI&CHI	Spe31|Spe38	GMYN	0.769926	4.66901	0.164902	2.43e-47	2145	505.396	1639.6	NA	1192	416.882	775.118	NA	NA	1.68861	1.09112:1.44325:1:1:1:1	0.449184(0.494406:0.371329:0.481818)	NA	NA	NA	NA
ABCA4	CHI&DIP	Spe02|Spe48	GMYN	0.864554	4.73606	0.182547	1.03e-30	2472	552.662	1919.34	NA	1385	425.159	959.841	NA	NA	1.7301	1.143:1.96057:1:1:1:1	0.397047(0.43568:0.340413:0.415049)	NA	NA	NA	NA
ABCA4	CHI&DIP	Spe04|Spe44	GMYN	0.405692	5.11776	0.0792715	1.33e-199	3801	919.359	2881.64	NA	1682	790.955	891.045	NA	NA	1.54541	1.27237:1.98482:1:1:1:1	0.459747(0.503552:0.393844:0.481847)	NA	NA	NA	NA
ABCA4	CHI&CHI	Spe39|Spe40	GMYN	0.854847	4.13691	0.206639	4.61e-19	1125	248.608	876.392	NA	634	199.966	434.034	NA	NA	1.58013	0.758667:1.4097:1:1:1:1	0.448889(0.497333:0.401333:0.448)	NA	NA	NA	NA
ABCA4	CHI&CHI	Spe02|Spe31	GMYN	0.817156	4.2992	0.190072	5.77e-37	1380	308.668	1071.33	NA	784	267.725	516.275	NA	NA	1.59599	0.770968:2.05917:1:1:1:1	0.442391(0.495652:0.363043:0.468478)	NA	NA	NA	NA
ABCA4	CHI&PAU	Spe34|Spe51	GMYN	0.492896	5.20414	0.0947123	1.16e-160	4332	1031.59	3300.41	NA	2026	850.475	1175.52	NA	NA	1.61479	1.25204:1.90733:1:1:1:1	0.466874(0.481648:0.367382:0.551593)	NA	NA	NA	NA
ABCA4	CHI&DIP	Spe31|Spe44	GMYN	0.411738	4.82681	0.0853022	7.64e-137	2544	623.751	1920.25	NA	1140	539.428	600.572	NA	NA	1.49425	1.47351:2.04163:1:1:1:1	0.448113(0.490566:0.383255:0.470519)	NA	NA	NA	NA
ABCA4	CHI&DIP	Spe03|Spe45	GMYN	0.744889	5.12321	0.145395	2.52e-80	3897	926.067	2970.93	NA	2126	748.082	1377.92	NA	NA	1.78534	1.31158:1.75703:1:1:1:1	0.423788(0.479985:0.372594:0.418784)	NA	NA	NA	NA
ABCA4	CHI&DIP	Spe36|Spe49	GMYN	1.10361	4.65398	0.237133	2.89e-14	2064	495.374	1568.63	NA	1259	372.302	886.698	NA	NA	1.95572	1.35081:1.61315:1:1:1:1	0.448401(0.503634:0.376453:0.465116)	NA	NA	NA	NA
ABCA4	CHI&DIP	Spe38|Spe45	GMYN	0.71691	4.6762	0.153311	1.44e-42	2145	510.265	1634.73	NA	1143	402.798	740.202	NA	NA	1.65877	1.15075:2.05003:1:1:1:1	0.44289(0.499301:0.360839:0.468531)	NA	NA	NA	NA
ABCA4	DIP&DIP	Spe14|Spe45	GMYN	0.340859	3.95987	0.0860784	1.3e-40	771	196.336	574.664	NA	314	158.63	155.37	NA	NA	1.26245	1.77315:2.2326:1:1:1:1	0.461089(0.535019:0.404669:0.44358)	NA	NA	NA	NA
ABCA4	CHI&DIP	Spe02|Spe46	GMYN	0.740384	4.21361	0.175713	7.19e-44	1299	275.377	1023.62	NA	718	247.168	470.832	NA	NA	1.47668	0.977747:1.64314:1:1:1:1	0.494996(0.502309:0.366051:0.616628)	NA	NA	NA	NA
ABCA4	DIP&DIP	Spe45|Spe50	GMYN	0.6607	5.15649	0.12813	2.09e-94	3954	968.09	2985.91	NA	2068	776.099	1291.9	NA	NA	1.76144	1.45369:1.62094:1:1:1:1	0.478882(0.500759:0.383915:0.551973)	NA	NA	NA	NA
ABCA4	DIP&CHI	Spe13|Spe33	GMYN	0.710836	4.84094	0.146839	2e-50	2523	635.608	1887.39	NA	1351	498.455	852.545	NA	NA	1.75131	1.59298:1.95113:1:1:1:1	0.458977(0.488109:0.363258:0.525565)	NA	NA	NA	NA
ABCA4	DIP&PAU	Spe49|Spe51	GMYN	1.14446	3.85736	0.296695	1.13e-13	2238	557.413	1680.59	NA	1378	415.619	962.381	NA	NA	1.82016	1.41758:2.02034:1:1:1:1	0.453753(0.508713:0.385389:0.467158)	NA	NA	NA	NA
ABCA4	CHI&DIP	Spe33|Spe48	GMYN	0.794783	5.26383	0.150989	2.3e-69	4764	1117.04	3646.96	NA	2608	861.092	1746.91	NA	NA	1.84267	1.35677:2.1791:1:1:1:1	0.415092(0.434509:0.348237:0.462531)	NA	NA	NA	NA
ABCA4	DIP&SYM	Spe11|Spe52	GMYN	0.651063	5.32009	0.122378	5.41e-183	5163	1204.06	3958.94	NA	2748	1055.7	1692.3	NA	NA	1.73992	1.02756:1.79743:1:1:1:1	0.479372(0.511331:0.391633:0.535154)	NA	NA	NA	NA
ABCA4	PAU&DIP	Spe10|Spe45	GMYN	0.664098	5.22499	0.1271	4.39e-127	4377	1060.67	3316.33	NA	2327	889.976	1437.02	NA	NA	1.76933	1.12833:1.56841:1:1:1:1	0.484921(0.504798:0.400274:0.549692)	NA	NA	NA	NA
ABCA4	CHI&PAU	Spe01|Spe10	GMYN	0.701991	5.30476	0.132332	3.26e-96	4854	1179.7	3674.3	NA	2574	927.356	1646.64	NA	NA	1.82064	1.32962:1.85065:1:1:1:1	0.466831(0.486094:0.369592:0.544808)	NA	NA	NA	NA
ABCA4	CHI&DIP	Spe38|Spe49	GMYN	1.07138	4.54861	0.235539	8.42e-19	1893	430.444	1462.56	NA	1152	338.309	813.691	NA	NA	1.86206	0.983053:1.20496:1:1:1:1	0.437665(0.494453:0.389857:0.428685)	NA	NA	NA	NA
ABCA4	DIP&CHI	Spe12|Spe31	GMYN	0.962007	3.1318	0.307174	1.09e-11	1380	325.515	1054.48	NA	800	240.385	559.615	NA	NA	1.47382	1.41356:1.62045:1:1:1:1	0.437681(0.497826:0.377174:0.438043)	NA	NA	NA	NA
ABCA4	DIP&CHI	Spe11|Spe32	GMYN	0.753544	4.7412	0.158935	1.18e-51	2487	556.466	1930.53	NA	1352	453.237	898.763	NA	NA	1.64578	1.15059:1.95482:1:1:1:1	0.413953(0.4807:0.359469:0.401689)	NA	NA	NA	NA
ABCA4	DIP&DIP	Spe12|Spe48	GMYN	0.97497	4.41541	0.220811	3.67e-30	1764	360.399	1403.6	NA	1044	303.747	740.253	NA	NA	1.67788	0.893602:1.92305:1:1:1:1	0.397109(0.454932:0.377551:0.358844)	NA	NA	NA	NA
ABCA4	CHI&CHI	Spe36|Spe41	GMYN	0.303129	4.86978	0.062247	4.72e-188	2973	660.526	2312.47	NA	1142	571.242	570.758	NA	NA	1.31772	1.10121:1.6637:1:1:1:1	0.45106(0.467709:0.360747:0.524723)	NA	NA	NA	NA
ABCA4	CHI&CHI	Spe35|Spe40	GMYN	0.949448	4.59061	0.206824	1.74e-36	2193	455.232	1737.77	NA	1290	380.588	909.412	NA	NA	1.7053	0.984654:1.50568:1:1:1:1	0.405381(0.48632:0.372093:0.357729)	NA	NA	NA	NA
ABCA4	CHI&CHI	Spe31|Spe40	GMYN	1.10226	4.54991	0.24226	6.83e-24	1944	431.19	1512.81	NA	1200	352.619	847.381	NA	NA	1.86697	0.950372:1.44752:1:1:1:1	0.4393(0.487654:0.384259:0.445988)	NA	NA	NA	NA
ABCA4	CHI&DIP	Spe31|Spe50	GMYN	0.706425	4.72006	0.149664	1.94e-54	2226	540.999	1685	NA	1203	443.563	759.437	NA	NA	1.68189	1.52049:1.59454:1:1:1:1	0.484726(0.485849:0.386792:0.581536)	NA	NA	NA	NA
ABCA4	CHI&DIP	Spe03|Spe15	GMYN	0.981535	4.76176	0.206128	2.25e-33	2649	571.931	2077.07	NA	1570	459.879	1110.12	NA	NA	1.7977	1.2205:1.89034:1:1:1:1	0.386372(0.453567:0.367497:0.338052)	NA	NA	NA	NA
ABCA4	SYM&DIP	Spe08|Spe47	GMYN	0.628263	3.10108	0.202595	9.98e-13	303	62.4751	240.525	NA	157	56.2152	100.785	NA	NA	1.13813	1.91755:1.9364:1:1:1:1	0.516502(0.490099:0.356436:0.70297)	NA	NA	NA	NA
ABCA4	DIP&DIP	Spe44|Spe50	GMYN	0.721343	5.30668	0.135931	1.6e-81	4920	1182.72	3737.28	NA	2609	906.715	1702.29	NA	NA	1.82362	1.29208:1.87241:1:1:1:1	0.460264(0.502439:0.376829:0.501524)	NA	NA	NA	NA
ABCA4	PAU&DIP	Spe10|Spe42	GMYN	0.915412	4.55452	0.20099	8.63e-23	1755	433.849	1321.15	NA	1025	338.854	686.146	NA	NA	1.81503	1.1289:2.10973:1:1:1:1	0.517094(0.521368:0.415385:0.61453)	NA	NA	NA	NA
ABCA4	CHI&DIP	Spe31|Spe49	GMYN	1.32178	6.44274	0.205158	1.14e-09	2022	484.367	1537.63	NA	1286	363.208	922.792	NA	NA	2.5485	1.23629:2.18081:1:1:1:1	0.45549(0.500742:0.393175:0.472552)	NA	NA	NA	NA
ABCA4	CHI&DIP	Spe35|Spe50	GMYN	0.613587	4.8394	0.12679	2.91e-129	2793	634.306	2158.69	NA	1473	583.837	889.163	NA	NA	1.57329	1.09107:1.58001:1:1:1:1	0.449338(0.475832:0.368421:0.503759)	NA	NA	NA	NA
ABCA4	CHI&DIP	Spe03|Spe17	GMYN	0.74327	5.15629	0.144148	5.4e-92	4056	967.823	3088.18	NA	2225	795.821	1429.18	NA	NA	1.79628	1.37365:1.95109:1:1:1:1	0.421228(0.460059:0.367973:0.435651)	NA	NA	NA	NA
ABCA4	CHI&CHI	Spe04|Spe40	GMYN	1.06154	4.69198	0.226245	3.13e-24	2241	521.116	1719.88	NA	1365	413.244	951.756	NA	NA	1.90575	1.12392:1.41116:1:1:1:1	0.443552(0.505355:0.389558:0.435743)	NA	NA	NA	NA
ABCA4	CHI&DIP	Spe34|Spe45	GMYN	0.678091	5.1536	0.131576	8.39e-89	3942	964.362	2977.64	NA	2078	769.863	1308.14	NA	NA	1.77297	1.32856:1.52359:1:1:1:1	0.469685(0.497336:0.380518:0.531202)	NA	NA	NA	NA
ABCA4	DIP&DIP	Spe42|Spe45	GMYN	1.15788	4.57157	0.253278	2.75e-14	1737	443.821	1293.18	NA	1085	342.695	742.305	NA	NA	2.03011	1.0898:2.29495:1:1:1:1	0.500864(0.522453:0.420553:0.559585)	NA	NA	NA	NA
ABCA4	DIP&DIP	Spe45|Spe46	GMYN	0.33219	4.80262	0.0691686	9.49e-220	2721	603.95	2117.05	NA	1134	572.51	561.49	NA	NA	1.32444	1.49831:2.10454:1:1:1:1	0.517641(0.510474:0.3914:0.651047)	NA	NA	NA	NA
ABCA4	CHI&DIP	Spe02|Spe16	GMYN	0.843276	4.73146	0.178227	8.94e-33	2439	549.286	1889.71	NA	1357	424.807	932.193	NA	NA	1.71893	1.25495:2.12928:1:1:1:1	0.394219(0.437884:0.345633:0.399139)	NA	NA	NA	NA
ABCA4	DIP&DIP	Spe17|Spe42	GMYN	0.938209	4.53948	0.206678	3.93e-18	1734	425.233	1308.77	NA	1009	322.015	686.985	NA	NA	1.82136	1.12287:2.19458:1:1:1:1	0.492791(0.50692:0.397059:0.574394)	NA	NA	NA	NA
ABCA4	DIP&DIP	Spe46|Spe47	GMYN	0.0446588	2.59405	0.0172159	2.39e-28	303	31.7768	271.223	NA	40	28.3976	11.6024	NA	NA	0.312023	2:2:1:1:1:1	0.570957(0.485149:0.351485:0.876238)	NA	NA	NA	NA
ABCA4	CHI&CHI	Spe03|Spe37	GMYN	0.31052	4.13788	0.0750434	4.11e-67	1113	248.93	864.07	NA	429	211.615	217.385	NA	NA	1.16653	1.26769:1.47245:1:1:1:1	0.422282(0.510782:0.381402:0.374663)	NA	NA	NA	NA
ABCA4	CHI&DIP	Spe39|Spe47	GMYN	0.832869	2.89837	0.287357	1.41e-08	285	47.6792	237.321	NA	160	43.0996	116.9	NA	NA	1.17842	1.01015:1.37264:1:1:1:1	0.526316(0.484211:0.357895:0.736842)	NA	NA	NA	NA
ABCA4	SYM&SYM	Spe07|Spe52	GMYN	0.620814	3.66242	0.169509	2.17e-20	627	132.056	494.944	NA	318	112.318	205.682	NA	NA	1.26143	1.05612:1.34765:1:1:1:1	0.515949(0.504785:0.423445:0.619617)	NA	NA	NA	NA
ABCA4	CHI&DIP	Spe03|Spe43	GMYN	0.730938	5.1502	0.141924	3.06e-113	4053	959.999	3093	NA	2238	820.047	1417.95	NA	NA	1.77769	1.23373:1.92014:1:1:1:1	0.440661(0.476684:0.374167:0.471132)	NA	NA	NA	NA
ABCA4	CHI&DIP	Spe36|Spe42	GMYN	0.921336	2.55482	0.360627	3.49e-06	651	149.327	501.673	NA	367	108.282	258.718	NA	NA	1.29603	0.797545:1.76106:1:1:1:1	0.498464(0.523041:0.417051:0.5553)	NA	NA	NA	NA
ABCA4	SYM&DIP	Spe08|Spe15	GMYN	1.12026	4.89912	0.228665	1.32e-19	2850	686.877	2163.12	NA	1752	520.918	1231.08	NA	NA	2.031	1.20318:1.5247:1:1:1:1	0.444386(0.488947:0.378947:0.465263)	NA	NA	NA	NA
ABCA4	CHI&DIP	Spe01|Spe42	GMYN	1.0795	3.24175	0.332998	6.57e-11	1599	400.312	1198.69	NA	967	296.25	670.75	NA	NA	1.62082	1.03544:1.61011:1:1:1:1	0.482489(0.511257:0.396811:0.5394)	NA	NA	NA	NA
ABCA4	DIP&CHI	Spe13|Spe41	GMYN	0.73461	4.87762	0.150608	2.65e-52	2805	667.468	2137.53	NA	1509	525.272	983.728	NA	NA	1.72046	1.26292:1.80459:1:1:1:1	0.460428(0.480214:0.384492:0.516578)	NA	NA	NA	NA
ABCA4	CHI&DIP	Spe35|Spe42	GMYN	1.18867	3.93991	0.3017	2.59e-09	822	191.179	630.821	NA	518	154.035	363.965	NA	NA	1.82854	0.989045:1.59829:1:1:1:1	0.453771(0.492701:0.39781:0.470803)	NA	NA	NA	NA
ABCA4	SYM&DIP	Spe08|Spe13	GMYN	0.507462	4.49568	0.112878	1.79e-57	1662	401.112	1260.89	NA	783	324.997	458.003	NA	NA	1.46999	1.1394:1.59956:1:1:1:1	0.455174(0.502708:0.379964:0.482852)	NA	NA	NA	NA
ABCA4	DIP&DIP	Spe43|Spe46	GMYN	0.228339	4.73851	0.048188	4.1e-259	2724	554.469	2169.53	NA	953	529.936	423.064	NA	NA	1.14638	1.18353:1.7693:1:1:1:1	0.522944(0.511013:0.393722:0.664097)	NA	NA	NA	NA
ABCA4	PAU&DIP	Spe10|Spe17	GMYN	0.681844	5.34722	0.127514	1.27e-115	5424	1248.4	4175.6	NA	2831	995.489	1835.51	NA	NA	1.75564	1.0241:1.66542:1:1:1:1	0.479259(0.489491:0.384403:0.563883)	NA	NA	NA	NA
ABCA4	SYM&PAU	Spe09|Spe51	GMYN	0.531951	5.26417	0.101051	2.41e-169	4671	1117.55	3553.45	NA	2267	933.543	1333.46	NA	NA	1.66415	1.26454:1.75894:1:1:1:1	0.454078(0.473667:0.374438:0.51413)	NA	NA	NA	NA
ABCA4	SYM&DIP	Spe08|Spe43	GMYN	0.624013	4.93903	0.126343	4.03e-102	3372	724.424	2647.58	NA	1717	614.821	1102.18	NA	NA	1.55103	1.002:1.8919:1:1:1:1	0.508007(0.504448:0.390569:0.629004)	NA	NA	NA	NA
ABCA4	DIP&DIP	Spe15|Spe47	GMYN	0.789239	3.08139	0.256131	1e-21	276	60.8568	215.143	NA	166	62.817	103.183	NA	NA	1.29465	1.42855:2.14683:1:1:1:1	0.463768(0.461957:0.331522:0.597826)	NA	NA	NA	NA
ABCA4	DIP&DIP	Spe16|Spe42	GMYN	0.966273	4.57414	0.211247	3.87e-19	1770	445.349	1324.65	NA	1047	341.975	705.025	NA	NA	1.87405	1.27654:1.95878:1:1:1:1	0.442373(0.488136:0.391525:0.447458)	NA	NA	NA	NA
ABCA4	DIP&DIP	Spe12|Spe45	GMYN	0.790232	4.22822	0.186894	3.79e-26	1305	280.797	1024.2	NA	719	230.045	488.955	NA	NA	1.52998	1.10136:1.68665:1:1:1:1	0.431034(0.486207:0.364368:0.442529)	NA	NA	NA	NA
ABCA4	CHI&CHI	Spe02|Spe33	GMYN	0.708037	4.73135	0.149648	1.04e-39	2364	549.206	1814.79	NA	1236	419.007	816.993	NA	NA	1.64274	1.31122:1.41175:1:1:1:1	0.446912(0.445431:0.345812:0.549492)	NA	NA	NA	NA
ABCA4	CHI&DIP	Spe31|Spe45	GMYN	0.400338	4.8128	0.0831819	9.16e-119	2523	612.204	1910.8	NA	1093	507.604	585.396	NA	NA	1.47102	1.40464:1.95715:1:1:1:1	0.46195(0.491677:0.374554:0.51962)	NA	NA	NA	NA
ABCA4	CHI&DIP	Spe03|Spe49	GMYN	1.11362	4.68532	0.237684	2.38e-18	2223	516.508	1706.49	NA	1365	399.935	965.065	NA	NA	1.9435	1.32631:1.73771:1:1:1:1	0.414305(0.491903:0.38664:0.364372)	NA	NA	NA	NA
ABCA4	DIP&CHI	Spe12|Spe35	GMYN	0.714262	4.21673	0.169388	1.13e-31	1266	276.525	989.475	NA	677	230.511	446.489	NA	NA	1.47929	1.29518:1.58729:1:1:1:1	0.402844(0.471564:0.356635:0.380332)	NA	NA	NA	NA
ABCA4	CHI&CHI	Spe02|Spe38	GMYN	0.777165	4.2106	0.184573	2.49e-27	1206	274.275	931.725	NA	670	227.997	442.003	NA	NA	1.55801	1.11223:1.26372:1:1:1:1	0.429519(0.501244:0.345771:0.441542)	NA	NA	NA	NA
ABCA4	DIP&DIP	Spe17|Spe43	GMYN	0.272421	5.53943	0.0491785	0	7140	1613.09	5526.91	NA	2658	1408.77	1249.23	NA	NA	1.46236	1.08263:2.03774:1:1:1:1	0.477451(0.495588:0.371008:0.565756)	NA	NA	NA	NA
ABCA4	DIP&DIP	Spe13|Spe15	GMYN	1.058	4.67549	0.226287	2.96e-24	2187	509.782	1677.22	NA	1328	404.937	923.063	NA	NA	1.90123	1.18158:2.14832:1:1:1:1	0.423868(0.486968:0.380658:0.403978)	NA	NA	NA	NA
ABCA4	DIP&PAU	Spe16|Spe51	GMYN	0.85755	5.28642	0.162217	2.33e-66	4881	1151.2	3729.8	NA	2764	897.594	1866.41	NA	NA	1.90212	1.55794:2.06282:1:1:1:1	0.410879(0.450215:0.358636:0.423786)	NA	NA	NA	NA
ABCA4	DIP&DIP	Spe11|Spe13	GMYN	0.584439	4.85485	0.120382	5.14e-115	2826	647.509	2178.49	NA	1442	572.173	869.827	NA	NA	1.5629	1.04957:1.62269:1:1:1:1	0.440552(0.498408:0.393312:0.429936)	NA	NA	NA	NA
ABCA4	DIP&CHI	Spe13|Spe36	GMYN	0.740991	4.86238	0.152393	7.76e-60	2664	654.044	2009.96	NA	1463	533.305	929.695	NA	NA	1.75284	1.46641:1.98436:1:1:1:1	0.450263(0.49268:0.38795:0.470158)	NA	NA	NA	NA
ABCA4	CHI&DIP	Spe40|Spe44	GMYN	0.9776	4.59398	0.2128	1.19e-41	2154	457.283	1696.72	NA	1300	394.946	905.054	NA	NA	1.74534	0.9645:1.39003:1:1:1:1	0.416667(0.511142:0.37883:0.360028)	NA	NA	NA	NA
ABCA4	DIP&CHI	Spe17|Spe31	GMYN	0.412758	4.78202	0.0863146	2.31e-117	2523	587.588	1935.41	NA	1099	493.109	605.891	NA	NA	1.43033	1.2512:1.99255:1:1:1:1	0.468094(0.485731:0.382878:0.535672)	NA	NA	NA	NA
ABCA4	DIP&SYM	Spe49|Spe52	GMYN	1.09082	4.55086	0.239696	5.65e-30	1830	431.738	1398.26	NA	1154	367.2	786.8	NA	NA	1.90712	1.10885:1.48184:1:1:1:1	0.485246(0.508197:0.394262:0.553279)	NA	NA	NA	NA
ABCA4	CHI&SYM	Spe04|Spe08	GMYN	0.65771	4.70312	0.139845	1.19e-60	2340	528.917	1811.08	NA	1211	434.122	776.878	NA	NA	1.57211	0.774978:1.67508:1:1:1:1	0.483547(0.508974:0.399359:0.542308)	NA	NA	NA	NA
ABCA4	DIP&CHI	Spe11|Spe37	GMYN	0.521238	4.14412	0.125778	1.49e-31	1077	251.009	825.991	NA	502	196.166	305.834	NA	NA	1.3656	1.67586:1.52593:1:1:1:1	0.431755(0.511142:0.376045:0.408078)	NA	NA	NA	NA
ABCA4	CHI&DIP	Spe04|Spe14	GMYN	0.543515	3.9285	0.138352	2.01e-33	783	188.292	594.708	NA	389	162.324	226.676	NA	NA	1.35752	1.32946:1.40953:1:1:1:1	0.466794(0.538314:0.40613:0.455939)	NA	NA	NA	NA
ABCA4	PAU&DIP	Spe10|Spe13	GMYN	0.577138	4.89935	0.117799	4.41e-96	2901	687.092	2213.91	NA	1451	573.986	877.014	NA	NA	1.60084	0.894058:1.28685:1:1:1:1	0.476215(0.496381:0.41365:0.518614)	NA	NA	NA	NA
ABCA4	SYM&CHI	Spe08|Spe32	GMYN	0.902301	4.55057	0.198283	1.81e-33	1851	431.567	1419.43	NA	1085	356.717	728.283	NA	NA	1.75291	0.948341:1.32437:1:1:1:1	0.442464(0.482172:0.377634:0.467585)	NA	NA	NA	NA
ABCA4	DIP&DIP	Spe15|Spe46	GMYN	0.986558	4.65642	0.21187	1.01e-50	2118	496.985	1621.02	NA	1312	440.698	871.302	NA	NA	1.84768	1.2913:1.5478:1:1:1:1	0.482059(0.500708:0.371813:0.573654)	NA	NA	NA	NA
ABCA4	PAU&DIP	Spe10|Spe12	GMYN	0.763422	4.21307	0.181203	2.29e-18	1083	275.181	807.819	NA	592	211.542	380.458	NA	NA	1.63995	1.80221:1.34696:1:1:1:1	0.461219(0.51108:0.376731:0.495845)	NA	NA	NA	NA
ABCA4	SYM&DIP	Spe08|Spe48	GMYN	0.749289	4.98019	0.150454	1.2e-90	3420	765.293	2654.71	NA	1884	654.802	1229.2	NA	NA	1.69604	0.90271:1.72653:1:1:1:1	0.432456(0.465789:0.382456:0.449123)	NA	NA	NA	NA
ABCA4	DIP&CHI	Spe11|Spe39	GMYN	0.872978	4.78719	0.182357	9.84e-39	2436	591.652	1844.35	NA	1407	473.049	933.951	NA	NA	1.82366	1.40883:1.59802:1:1:1:1	0.457718(0.495074:0.379926:0.498153)	NA	NA	NA	NA
ABCA4	DIP&SYM	Spe44|Spe52	GMYN	0.649283	5.3323	0.121764	1.67e-184	5211	1223.83	3987.17	NA	2773	1071.19	1701.81	NA	NA	1.74911	1.06302:1.8673:1:1:1:1	0.48033(0.512953:0.392343:0.535694)	NA	NA	NA	NA
ABCA4	SYM&CHI	Spe08|Spe35	GMYN	0.687074	4.55674	0.150782	1.36e-65	1887	435.136	1451.86	NA	1024	383.564	640.436	NA	NA	1.57941	0.968821:1.7898:1:1:1:1	0.447006(0.490461:0.371224:0.479332)	NA	NA	NA	NA
ABCA4	CHI&DIP	Spe03|Spe48	GMYN	0.767687	5.08482	0.150976	8.2e-71	4044	879.857	3164.14	NA	2188	701.373	1486.63	NA	NA	1.70697	1.33571:1.97497:1:1:1:1	0.381182(0.436944:0.355712:0.35089)	NA	NA	NA	NA
ABCA4	SYM&DIP	Spe08|Spe50	GMYN	0.624461	4.94	0.126409	1.18e-88	3081	725.364	2355.64	NA	1583	599.867	983.133	NA	NA	1.64047	1.31656:1.64964:1:1:1:1	0.479228(0.485394:0.374878:0.57741)	NA	NA	NA	NA
ABCA4	CHI&DIP	Spe34|Spe43	GMYN	0.734356	5.15962	0.142328	2.46e-85	4245	972.138	3272.86	NA	2289	782.896	1506.1	NA	NA	1.74778	1.20125:1.89457:1:1:1:1	0.486572(0.497173:0.371731:0.590813)	NA	NA	NA	NA
ABCA4	DIP&DIP	Spe12|Spe44	GMYN	0.913832	4.48859	0.20359	1.5e-28	1740	397.339	1342.66	NA	1021	325.164	695.836	NA	NA	1.73015	1.28987:1.60915:1:1:1:1	0.426149(0.496552:0.393966:0.387931)	NA	NA	NA	NA
ABCA4	CHI&PAU	Spe37|Spe51	GMYN	0.45902	4.23585	0.108365	1.07e-37	1119	283.669	835.331	NA	501	218.749	282.251	NA	NA	1.41645	1.86339:2.30455:1:1:1:1	0.461573(0.512064:0.383378:0.489276)	NA	NA	NA	NA
ABCA4	CHI&DIP	Spe04|Spe12	GMYN	1.04026	4.44415	0.234074	1.16e-18	1530	374.479	1155.52	NA	934	298.687	635.313	NA	NA	1.87339	1.17664:1.85216:1:1:1:1	0.450327(0.492157:0.402941:0.455882)	NA	NA	NA	NA
ABCA4	CHI&DIP	Spe41|Spe48	GMYN	0.7723	4.89201	0.15787	5.52e-47	2898	680.401	2217.6	NA	1578	529.918	1048.08	NA	NA	1.73954	1.41352:2.00014:1:1:1:1	0.428226(0.449275:0.349379:0.486025)	NA	NA	NA	NA
ABCA4	PAU&SYM	Spe51|Spe52	GMYN	0.615306	5.2579	0.117025	1.3e-127	4713	1108.25	3604.75	NA	2391	901.149	1489.85	NA	NA	1.707	1.41304:1.86623:1:1:1:1	0.491301(0.494908:0.377467:0.601528)	NA	NA	NA	NA
ABCA4	CHI&CHI	Spe04|Spe34	GMYN	0.667989	5.01942	0.133081	1.03e-82	3324	806.389	2517.61	NA	1750	654.806	1095.19	NA	NA	1.72363	1.25954:1.71727:1:1:1:1	0.47503(0.495487:0.380415:0.549188)	NA	NA	NA	NA
ABCA4	DIP&DIP	Spe16|Spe47	GMYN	0.128711	3.15714	0.0407681	0	303	67.3241	235.676	NA	100	72.3156	27.6844	NA	NA	0.801602	1.59452:2.18507:1:1:1:1	0.460396(0.430693:0.341584:0.608911)	NA	NA	NA	NA
ABCA4	DIP&DIP	Spe15|Spe43	GMYN	1.12214	4.94361	0.226987	2.86e-50	3081	728.856	2352.14	NA	1963	624.853	1338.15	NA	NA	2.02616	1.14942:1.60774:1:1:1:1	0.470302(0.497079:0.38705:0.526777)	NA	NA	NA	NA
ABCA4	CHI&DIP	Spe03|Spe12	GMYN	0.790016	4.16339	0.189753	6.04e-18	1173	257.543	915.457	NA	638	199.536	438.464	NA	NA	1.53067	1.44038:1.4013:1:1:1:1	0.40324(0.492327:0.368286:0.349105)	NA	NA	NA	NA
ABCA4	CHI&DIP	Spe01|Spe50	GMYN	0.596721	5.28141	0.112985	1.46e-150	4920	1143.54	3776.46	NA	2480	950.014	1529.99	NA	NA	1.68557	1.13389:1.68365:1:1:1:1	0.466565(0.491463:0.365854:0.542378)	NA	NA	NA	NA
ABCA4	CHI&CHI	Spe04|Spe35	GMYN	0.701583	4.9551	0.141588	3.54e-90	3186	740.115	2445.88	NA	1721	628.81	1092.19	NA	NA	1.68969	1.13917:1.89588:1:1:1:1	0.438481(0.468456:0.387476:0.45951)	NA	NA	NA	NA
ABCA4	CHI&DIP	Spe04|Spe45	GMYN	0.400724	5.1171	0.0783108	5.53e-181	3816	918.548	2897.45	NA	1654	765.799	888.201	NA	NA	1.536	1.22435:1.77129:1:1:1:1	0.475236(0.50511:0.392689:0.527909)	NA	NA	NA	NA
ABCA4	CHI&DIP	Spe40|Spe46	GMYN	1.04276	4.54041	0.229662	7.36e-55	1932	425.759	1506.24	NA	1221	394.244	826.756	NA	NA	1.81354	0.836393:1.36665:1:1:1:1	0.495859(0.520963:0.400621:0.565994)	NA	NA	NA	NA
ABCA4	DIP&DIP	Spe42|Spe49	GMYN	1.05862	2.24115	0.472354	2.75e-07	1305	359.378	945.622	NA	782	255.955	526.045	NA	NA	1.38427	1.54346:2.21294:1:1:1:1	0.474713(0.521839:0.405747:0.496552)	NA	NA	NA	NA
ABCA4	SYM&CHI	Spe09|Spe38	GMYN	0.659683	4.68185	0.140902	1.05e-62	2268	514.128	1753.87	NA	1184	428.641	755.359	NA	NA	1.57146	0.942087:1.73621:1:1:1:1	0.445767(0.480159:0.380291:0.476852)	NA	NA	NA	NA
ABCA4	CHI&PAU	Spe41|Spe51	GMYN	0.483257	4.91069	0.0984092	8.92e-102	2967	697.561	2269.44	NA	1358	560.804	797.196	NA	NA	1.52418	1.41843:1.90249:1:1:1:1	0.4636(0.468655:0.360465:0.561678)	NA	NA	NA	NA
ABCA4	SYM&CHI	Spe09|Spe36	GMYN	0.52357	4.84628	0.108035	1.01e-116	2790	640.151	2149.85	NA	1353	555.083	797.917	NA	NA	1.51539	1.13559:1.65234:1:1:1:1	0.445878(0.468817:0.377957:0.49086)	NA	NA	NA	NA
ABCA4	CHI&CHI	Spe40|Spe41	GMYN	0.989174	4.54244	0.217763	9.33e-61	2118	426.918	1691.08	NA	1291	395.223	895.777	NA	NA	1.7054	0.520421:1.4029:1:1:1:1	0.438857(0.499292:0.366856:0.450425)	NA	NA	NA	NA
ABCA4	DIP&PAU	Spe17|Spe51	GMYN	0.743685	5.30671	0.140141	4.26e-70	4908	1182.76	3725.24	NA	2617	889.926	1727.07	NA	NA	1.84331	1.49399:1.75957:1:1:1:1	0.45762(0.47555:0.363998:0.533313)	NA	NA	NA	NA
ABCA4	DIP&DIP	Spe11|Spe15	GMYN	0.924766	4.24436	0.217881	2.27e-27	3075	699.09	2375.91	NA	1761	522.49	1238.51	NA	NA	1.67946	1.28092:1.42137:1:1:1:1	0.414634(0.48878:0.38439:0.370732)	NA	NA	NA	NA
ABCA4	SYM&CHI	Spe08|Spe38	GMYN	0.947118	4.5277	0.209183	2.06e-29	1860	418.605	1441.4	NA	1100	343.367	756.633	NA	NA	1.75295	0.84286:1.26956:1:1:1:1	0.460484(0.495161:0.376613:0.509677)	NA	NA	NA	NA
ABCA4	DIP&DIP	Spe13|Spe46	GMYN	0.595246	4.78728	0.124339	5.5e-99	2595	591.724	2003.28	NA	1328	517.752	810.248	NA	NA	1.55113	1.17344:1.78449:1:1:1:1	0.511561(0.510983:0.395376:0.628324)	NA	NA	NA	NA
ABCA4	CHI&DIP	Spe40|Spe48	GMYN	1.01465	4.52618	0.224173	1.9e-25	1986	417.76	1568.24	NA	1184	338.273	845.727	NA	NA	1.75331	1.24705:1.97451:1:1:1:1	0.394008(0.467523:0.376133:0.338369)	NA	NA	NA	NA
ABCA4	PAU&DIP	Spe10|Spe15	GMYN	1.14337	3.58298	0.319112	7.22e-18	3105	787.806	2317.19	NA	1916	585.881	1330.12	NA	NA	1.76236	1.40997:2.01929:1:1:1:1	0.458615(0.49372:0.392271:0.489855)	NA	NA	NA	NA
ABCA4	CHI&CHI	Spe02|Spe03	GMYN	0.744999	4.70656	0.15829	1.43e-61	2373	531.343	1841.66	NA	1302	451.189	850.811	NA	NA	1.63204	0.989165:1.58404:1:1:1:1	0.400126(0.448167:0.348293:0.403919)	NA	NA	NA	NA
ABCA4	PAU&PAU	Spe10|Spe51	GMYN	0.693121	5.30562	0.130639	2.99e-103	4920	1181.05	3738.95	NA	2603	938.569	1664.43	NA	NA	1.80035	1.34288:1.52479:1:1:1:1	0.476829(0.487805:0.377134:0.565549)	NA	NA	NA	NA
ABCA4	SYM&DIP	Spe09|Spe14	GMYN	0.64235	3.7687	0.170443	1.77e-29	663	152.16	510.84	NA	354	138.024	215.976	NA	NA	1.35986	0.778098:1.54365:1:1:1:1	0.44721(0.524887:0.40724:0.409502)	NA	NA	NA	NA
ABCA4	SYM&DIP	Spe08|Spe14	GMYN	0.707851	3.83195	0.184724	3.83e-25	798	165.548	632.452	NA	427	144.816	282.184	NA	NA	1.35596	0.634895:1.15082:1:1:1:1	0.452381(0.537594:0.383459:0.43609)	NA	NA	NA	NA
ABCA4	CHI&CHI	Spe34|Spe35	GMYN	0.620541	4.85544	0.127803	3.45e-74	2781	648.021	2132.98	NA	1410	525.987	884.013	NA	NA	1.60734	1.12699:1.87931:1:1:1:1	0.430061(0.47411:0.351672:0.464401)	NA	NA	NA	NA
ABCA4	DIP&CHI	Spe13|Spe31	GMYN	0.643671	4.77003	0.134941	1.11e-72	2394	578.272	1815.73	NA	1256	484.704	771.296	NA	NA	1.6404	1.15783:1.70061:1:1:1:1	0.4599(0.494361:0.388471:0.496867)	NA	NA	NA	NA
ABCA4	CHI&DIP	Spe01|Spe13	GMYN	0.662392	4.81675	0.137518	1.07e-56	2631	615.441	2015.56	NA	1355	484.505	870.495	NA	NA	1.63418	1.01285:1.59677:1:1:1:1	0.442797(0.496009:0.36374:0.468643)	NA	NA	NA	NA
ABCA4	DIP&CHI	Spe11|Spe40	GMYN	0.931814	4.59095	0.202968	1.78e-39	2073	455.44	1617.56	NA	1232	386.491	845.509	NA	NA	1.73573	1.14382:1.43689:1:1:1:1	0.422094(0.519537:0.380608:0.366136)	NA	NA	NA	NA
ABCA4	CHI&CHI	Spe01|Spe04	GMYN	0.686782	4.99602	0.137466	1.71e-64	3258	781.61	2476.39	NA	1705	610.046	1094.95	NA	NA	1.72059	1.20932:1.72976:1:1:1:1	0.464242(0.50046:0.369705:0.52256)	NA	NA	NA	NA
ABCA4	CHI&DIP	Spe38|Spe47	GMYN	0.881453	2.43529	0.36195	0.000873168	303	68.8513	234.149	NA	166	49.6304	116.37	NA	NA	1.23453	2.60313:1.1839:1:1:1:1	0.509901(0.460396:0.371287:0.69802)	NA	NA	NA	NA
ABCA4	CHI&CHI	Spe01|Spe36	GMYN	0.626788	4.81129	0.130274	2.13e-82	2706	610.973	2095.03	NA	1389	514.929	874.071	NA	NA	1.57158	1.04854:1.74968:1:1:1:1	0.438285(0.481153:0.355876:0.477827)	NA	NA	NA	NA
ABCA4	CHI&DIP	Spe37|Spe49	GMYN	0.887765	3.81579	0.232656	2.18e-18	777	162.02	614.98	NA	452	140.829	311.171	NA	NA	1.49832	0.709021:1.0255:1:1:1:1	0.442728(0.528958:0.395753:0.403475)	NA	NA	NA	NA
ABCA4	DIP&DIP	Spe16|Spe49	GMYN	1.03435	4.55162	0.22725	2.52e-33	2073	432.172	1640.83	NA	1257	365.637	891.363	NA	NA	1.76762	0.933137:1.71266:1:1:1:1	0.399904(0.468886:0.374819:0.356006)	NA	NA	NA	NA
ABCA4	CHI&DIP	Spe05|Spe12	GMYN	0.65178	4.51709	0.144292	6.82e-83	1932	412.729	1519.27	NA	1028	380.75	647.25	NA	NA	1.47752	0.621238:1.57212:1:1:1:1	0.425983(0.479037:0.374224:0.424689)	NA	NA	NA	NA
ABCA4	DIP&CHI	Spe15|Spe37	GMYN	0.808213	4.10511	0.196879	1.56e-21	1113	238.29	874.71	NA	618	194.656	423.344	NA	NA	1.51407	1.03138:1.40459:1:1:1:1	0.420934(0.508086:0.376011:0.378706)	NA	NA	NA	NA
ABCA4	CHI&CHI	Spe04|Spe39	GMYN	1.02102	4.62374	0.220822	7.59e-20	1965	475.793	1489.21	NA	1182	368.999	813.001	NA	NA	1.89336	1.26677:1.82167:1:1:1:1	0.489313(0.503817:0.387786:0.576336)	NA	NA	NA	NA
ABCA4	CHI&PAU	Spe38|Spe51	GMYN	0.630979	4.71092	0.13394	1.79e-49	2241	534.446	1706.55	NA	1132	415.657	716.343	NA	NA	1.60399	1.28538:1.70086:1:1:1:1	0.449576(0.486613:0.366801:0.495315)	NA	NA	NA	NA
ABCA4	DIP&CHI	Spe13|Spe32	GMYN	0.682522	4.77797	0.142847	2.1e-57	2469	584.427	1884.57	NA	1302	471.565	830.435	NA	NA	1.65194	1.37506:1.44677:1:1:1:1	0.423046(0.482989:0.367558:0.418591)	NA	NA	NA	NA
ABCA4	CHI&SYM	Spe05|Spe52	GMYN	0.604245	5.22305	0.115688	3.65e-180	4710	1057.92	3652.08	NA	2419	932.082	1486.92	NA	NA	1.64169	0.868975:1.75719:1:1:1:1	0.474735(0.492994:0.366879:0.564331)	NA	NA	NA	NA
ABCA4	DIP&CHI	Spe13|Spe35	GMYN	0.550261	4.84013	0.113687	4.59e-115	2883	634.928	2248.07	NA	1417	554.946	862.054	NA	NA	1.49503	1.03359:1.43594:1:1:1:1	0.425425(0.473465:0.389178:0.413632)	NA	NA	NA	NA
ABCA4	SYM&CHI	Spe07|Spe31	GMYN	1.05022	3.65692	0.287186	1.53e-07	576	131.091	444.909	NA	350	104.61	245.39	NA	NA	1.64347	1.3525:1.75417:1:1:1:1	0.473958(0.486979:0.372396:0.5625)	NA	NA	NA	NA
ABCA4	CHI&CHI	Spe34|Spe40	GMYN	0.993134	1.99155	0.498674	2.65e-08	1587	404.323	1182.68	NA	921	281.933	639.067	NA	NA	1.2475	1.58651:1.88207:1:1:1:1	0.449905(0.490548:0.389414:0.469754)	NA	NA	NA	NA
ABCA4	SYM&CHI	Spe08|Spe33	GMYN	0.69605	4.92053	0.141458	1.15e-55	3042	706.77	2335.23	NA	1588	547.229	1040.77	NA	NA	1.67755	1.28563:1.77186:1:1:1:1	0.472222(0.453649:0.37426:0.588757)	NA	NA	NA	NA
ABCA4	DIP&PAU	Spe46|Spe51	GMYN	0.707783	4.70122	0.150553	7.15e-62	2388	527.576	1860.42	NA	1282	444.04	837.96	NA	NA	1.59005	1.52018:2.25094:1:1:1:1	0.511935(0.492462:0.371231:0.672111)	NA	NA	NA	NA
ABCA4	DIP&CHI	Spe12|Spe32	GMYN	0.88758	4.14814	0.213971	6.29e-15	1137	252.358	884.642	NA	646	196.123	449.877	NA	NA	1.61126	1.55094:1.60934:1:1:1:1	0.409411(0.515831:0.35752:0.354881)	NA	NA	NA	NA
ABCA4	DIP&CHI	Spe13|Spe34	GMYN	0.738691	4.88635	0.151175	2.7e-49	2721	675.28	2045.72	NA	1472	526.548	945.452	NA	NA	1.76803	1.37157:1.77151:1:1:1:1	0.461044(0.494487:0.387541:0.501103)	NA	NA	NA	NA
ABCA4	CHI&DIP	Spe40|Spe42	GMYN	1.16317	4.40757	0.263902	8.04e-24	1512	356.65	1155.35	NA	964	303.29	660.71	NA	NA	1.92846	0.832311:2.1017:1:1:1:1	0.455357(0.514881:0.394841:0.456349)	NA	NA	NA	NA
ABCA4	SYM&DIP	Spe09|Spe49	GMYN	1.18491	4.50606	0.26296	2e-18	1749	406.701	1342.3	NA	1097	327.297	769.703	NA	NA	1.95719	1.06785:2.32513:1:1:1:1	0.445969(0.487993:0.390223:0.459691)	NA	NA	NA	NA
ABCA4	DIP&DIP	Spe14|Spe47	GMYN	0.751282	2.98265	0.251884	2.94e-21	267	53.3497	213.65	NA	156	56.4573	99.5427	NA	NA	1.19713	0.916379:2.17857:1:1:1:1	0.524345(0.55618:0.38764:0.629213)	NA	NA	NA	NA
ABCA4	CHI&CHI	Spe01|Spe03	GMYN	0.382718	5.15231	0.0742808	1.73e-180	4113	962.709	3150.29	NA	1713	779.374	933.626	NA	NA	1.49911	1.29737:1.4946:1:1:1:1	0.415876(0.470095:0.366521:0.411014)	NA	NA	NA	NA
ABCA4	DIP&DIP	Spe11|Spe42	GMYN	1.13025	1.72305	0.655958	0.000184737	1668	443.686	1224.31	NA	1002	299.315	702.685	NA	NA	1.28794	1.57367:1.93934:1:1:1:1	0.478717(0.513489:0.415468:0.507194)	NA	NA	NA	NA
ABCA4	CHI&CHI	Spe35|Spe39	GMYN	0.962123	4.39659	0.218834	9.68e-20	1458	351.468	1106.53	NA	866	279.18	586.82	NA	NA	1.79004	1.52731:1.67019:1:1:1:1	0.448217(0.483539:0.398148:0.462963)	NA	NA	NA	NA
ABCA4	DIP&DIP	Spe47|Spe49	GMYN	0.644903	3.01388	0.213978	3.38e-16	273	55.6179	217.382	NA	147	54.4437	92.5563	NA	NA	1.12753	1.22269:1.33674:1:1:1:1	0.481685(0.472527:0.351648:0.620879)	NA	NA	NA	NA
ABCA4	PAU&DIP	Spe10|Spe16	GMYN	0.706369	5.34145	0.132243	1.02e-142	5343	1238.85	4104.15	NA	2882	1043.19	1838.81	NA	NA	1.78108	1.07879:1.81093:1:1:1:1	0.431686(0.463223:0.374228:0.457608)	NA	NA	NA	NA
ABCA4	CHI&CHI	Spe05|Spe35	GMYN	0.645804	4.96949	0.129954	3.31e-75	3300	754.45	2545.55	NA	1681	599.886	1081.11	NA	NA	1.63429	1.18094:1.74709:1:1:1:1	0.42197(0.466364:0.358182:0.441364)	NA	NA	NA	NA
ABCA4	PAU&CHI	Spe10|Spe41	GMYN	0.630479	4.88963	0.128942	8.24e-78	2913	678.245	2234.75	NA	1492	553.581	938.419	NA	NA	1.62215	1.26381:1.53871:1:1:1:1	0.48541(0.479403:0.38414:0.592688)	NA	NA	NA	NA
ABCA4	DIP&CHI	Spe12|Spe38	GMYN	0.969632	4.1686	0.232604	1.4e-13	1149	259.338	889.662	NA	675	202.566	472.434	NA	NA	1.69166	1.15718:1.83597:1:1:1:1	0.433856(0.522193:0.366841:0.412533)	NA	NA	NA	NA
ABCA4	SYM&DIP	Spe07|Spe43	GMYN	0.685479	3.57095	0.19196	8.18e-27	594	116.893	477.107	NA	321	110.735	210.265	NA	NA	1.25331	0.968015:1.68721:1:1:1:1	0.515993(0.487374:0.39899:0.661616)	NA	NA	NA	NA
ABCA4	CHI&SYM	Spe01|Spe07	GMYN	0.550641	3.71344	0.148283	3.27e-25	618	141.352	476.648	NA	305	121.858	183.142	NA	NA	1.27405	1.19681:1.49377:1:1:1:1	0.471683(0.478155:0.402913:0.533981)	NA	NA	NA	NA
ABCA4	PAU&DIP	Spe10|Spe48	GMYN	0.709677	5.32442	0.133287	1.05e-135	5274	1211.03	4062.97	NA	2840	1014.3	1825.7	NA	NA	1.76933	0.949497:1.65784:1:1:1:1	0.439704(0.461035:0.379408:0.478669)	NA	NA	NA	NA
ABCA4	CHI&DIP	Spe03|Spe42	GMYN	1.10342	4.54199	0.242936	1.13e-13	1674	426.662	1247.34	NA	1029	325.391	703.609	NA	NA	1.97983	1.13847:2.13453:1:1:1:1	0.444146(0.491039:0.382616:0.458781)	NA	NA	NA	NA
ABCA4	PAU&DIP	Spe10|Spe50	GMYN	0.654017	5.29834	0.123438	1.79e-123	4908	1169.64	3738.36	NA	2558	950.711	1607.29	NA	NA	1.76082	1.34511:1.54334:1:1:1:1	0.492461(0.501528:0.37989:0.595966)	NA	NA	NA	NA
ABCA4	DIP&DIP	Spe42|Spe48	GMYN	0.882235	4.56018	0.193465	4.79e-27	1755	437.134	1317.87	NA	1017	346.497	670.503	NA	NA	1.79833	1.16742:1.82093:1:1:1:1	0.447863(0.482906:0.387179:0.473504)	NA	NA	NA	NA
ABCA4	DIP&DIP	Spe13|Spe16	GMYN	0.64322	4.82065	0.13343	4.49e-69	2802	618.648	2183.35	NA	1425	501.308	923.692	NA	NA	1.56555	1.0924:1.93607:1:1:1:1	0.41399(0.471627:0.377944:0.392398)	NA	NA	NA	NA
ABCA4	DIP&DIP	Spe12|Spe49	GMYN	0.857701	3.87397	0.221401	4.38e-21	858	175.089	682.911	NA	490	152.11	337.89	NA	NA	1.47322	0.613799:0.851689:1:1:1:1	0.438228(0.533217:0.382867:0.398601)	NA	NA	NA	NA
ABCA4	CHI&CHI	Spe34|Spe36	GMYN	0.15311	4.95976	0.0308704	3.28e-216	2916	744.724	2171.28	NA	864	565.131	298.869	NA	NA	1.38069	1.90832:2.20881:1:1:1:1	0.453875(0.48714:0.36214:0.512346)	NA	NA	NA	NA
ABCA4	DIP&CHI	Spe14|Spe35	GMYN	0.777281	3.71737	0.209094	1.18e-22	672	142.094	529.906	NA	378	128.007	249.993	NA	NA	1.39896	0.689215:1.28915:1:1:1:1	0.449405(0.508929:0.390625:0.448661)	NA	NA	NA	NA
ABCA4	CHI&CHI	Spe32|Spe39	GMYN	0.823216	4.18559	0.196679	9.7e-33	1221	265.281	955.719	NA	698	232.067	465.933	NA	NA	1.55374	0.992734:0.999738:1:1:1:1	0.43448(0.497543:0.373464:0.432432)	NA	NA	NA	NA
ABCA4	CHI&PAU	Spe33|Spe51	GMYN	0.652957	5.27179	0.123859	6.04e-94	4845	1128.97	3716.03	NA	2462	869.229	1592.77	NA	NA	1.72923	1.3198:1.81789:1:1:1:1	0.455934(0.4613:0.357895:0.548607)	NA	NA	NA	NA
ABCA4	DIP&DIP	Spe16|Spe44	GMYN	0.426359	5.35585	0.0796063	9.29e-259	5847	1262.85	4584.15	NA	2541	1071.79	1469.21	NA	NA	1.49104	1.28631:2.03501:1:1:1:1	0.397811(0.463571:0.368907:0.360954)	NA	NA	NA	NA
ABCA4	SYM&CHI	Spe09|Spe33	GMYN	0.587372	5.22595	0.112395	7.23e-149	4572	1062.03	3509.97	NA	2298	891.734	1406.27	NA	NA	1.66486	1.13166:1.5615:1:1:1:1	0.452647(0.460958:0.366798:0.530184)	NA	NA	NA	NA
ABCA4	CHI&CHI	Spe05|Spe40	GMYN	0.762723	4.63758	0.164466	1.61e-51	2229	484.657	1744.34	NA	1220	405.765	814.235	NA	NA	1.60524	1.13182:1.57298:1:1:1:1	0.414087(0.501346:0.355316:0.385599)	NA	NA	NA	NA
ABCA4	CHI&DIP	Spe03|Spe46	GMYN	0.761143	4.77714	0.15933	3.2e-75	2340	583.778	1756.22	NA	1340	513.691	826.309	NA	NA	1.76304	1.52622:1.89833:1:1:1:1	0.474573(0.484615:0.375641:0.563462)	NA	NA	NA	NA
ABCA4	CHI&SYM	Spe04|Spe09	GMYN	0.693212	5.04031	0.137534	3.34e-74	3348	829.162	2518.84	NA	1783	662.015	1120.98	NA	NA	1.76981	1.41307:1.64819:1:1:1:1	0.464008(0.492832:0.380824:0.518369)	NA	NA	NA	NA
ABCA4	CHI&DIP	Spe05|Spe48	GMYN	0.70442	5.23746	0.134496	3.36e-93	4845	1078.46	3766.54	NA	2534	852.213	1681.79	NA	NA	1.71344	1.134:1.62598:1:1:1:1	0.400826(0.43808:0.35356:0.410836)	NA	NA	NA	NA
ABCA4	SYM&DIP	Spe08|Spe12	GMYN	0.881736	4.49359	0.196221	2.88e-43	1800	399.993	1400.01	NA	1055	347.693	707.307	NA	NA	1.68435	0.681004:1.36288:1:1:1:1	0.449444(0.490833:0.389167:0.468333)	NA	NA	NA	NA
ABCA4	CHI&DIP	Spe33|Spe49	GMYN	1.04479	4.67893	0.223296	7.67e-20	2109	512.126	1596.87	NA	1276	395.477	880.523	NA	NA	1.92726	1.40643:1.85338:1:1:1:1	0.438596(0.464438:0.37909:0.472262)	NA	NA	NA	NA
ABCA4	DIP&DIP	Spe15|Spe16	GMYN	1.07318	4.8502	0.221264	3.69e-37	3132	643.506	2488.49	NA	1908	526.913	1381.09	NA	NA	1.84921	1.05816:1.38175:1:1:1:1	0.383621(0.453065:0.371169:0.326628)	NA	NA	NA	NA
ABCA4	SYM&CHI	Spe07|Spe34	GMYN	0.492395	3.74128	0.131611	1.38e-24	621	146.698	474.302	NA	290	121.141	168.859	NA	NA	1.25988	1.81247:1.57551:1:1:1:1	0.492754(0.471014:0.403382:0.603865)	NA	NA	NA	NA
ABCA4	DIP&DIP	Spe17|Spe49	GMYN	1.10104	4.6876	0.234884	1.01e-19	2154	518.085	1635.91	NA	1322	403.522	918.478	NA	NA	1.96369	1.13441:1.97622:1:1:1:1	0.445915(0.500696:0.37883:0.458217)	NA	NA	NA	NA
ABCA4	CHI&DIP	Spe05|Spe16	GMYN	0.692933	5.28708	0.131062	3.14e-144	5361	1152.22	4208.78	NA	2834	976.292	1857.71	NA	NA	1.68033	0.979066:1.78966:1:1:1:1	0.395449(0.447678:0.350308:0.38836)	NA	NA	NA	NA
ABCA4	DIP&DIP	Spe15|Spe44	GMYN	1.01053	4.94593	0.204316	1.2e-25	3102	731.116	2370.88	NA	1845	553.314	1291.69	NA	NA	1.93807	1.46493:1.61393:1:1:1:1	0.419084(0.49323:0.384913:0.37911)	NA	NA	NA	NA
ABCA4	CHI&CHI	Spe04|Spe41	GMYN	0.673334	4.87942	0.137995	8.22e-80	2859	669.075	2189.93	NA	1518	560.62	957.38	NA	NA	1.65766	1.28447:1.46194:1:1:1:1	0.473592(0.474816:0.379853:0.566107)	NA	NA	NA	NA
ABCA4	CHI&DIP	Spe32|Spe46	GMYN	0.782778	4.73246	0.165406	7.44e-67	2334	550.014	1783.99	NA	1332	479.762	852.238	NA	NA	1.71353	1.40516:1.62185:1:1:1:1	0.481362(0.485219:0.365681:0.593188)	NA	NA	NA	NA
ABCA4	CHI&CHI	Spe38|Spe40	GMYN	1.1081	4.57247	0.242343	8.34e-15	1941	444.356	1496.64	NA	1188	340.156	847.844	NA	NA	1.90121	1.3623:1.5498:1:1:1:1	0.420402(0.50541:0.377898:0.377898)	NA	NA	NA	NA
ABCA4	SYM&DIP	Spe07|Spe15	GMYN	0.785894	3.67807	0.21367	1.01e-13	600	134.841	465.159	NA	333	111.008	221.992	NA	NA	1.43587	1.02875:1.76909:1:1:1:1	0.459167(0.48:0.4175:0.48)	NA	NA	NA	NA
ABCA4	PAU&CHI	Spe10|Spe34	GMYN	0.61065	5.20542	0.11731	5.82e-110	4281	1033.35	3247.65	NA	2162	825.296	1336.7	NA	NA	1.71974	1.29274:1.68346:1:1:1:1	0.486335(0.498949:0.378767:0.581289)	NA	NA	NA	NA
ABCA4	DIP&DIP	Spe11|Spe43	GMYN	0.433416	5.62326	0.0770755	0	7617	1803.84	5813.16	NA	3438	1551.84	1886.16	NA	NA	1.66246	1.23722:2.17707:1:1:1:1	0.459039(0.499212:0.371406:0.506499)	NA	NA	NA	NA
ABCA4	SYM&CHI	Spe07|Spe33	GMYN	0.560999	3.69213	0.151944	1.89e-22	615	137.393	477.607	NA	302	116.086	185.914	NA	NA	1.26051	1.27514:1.38753:1:1:1:1	0.47561(0.460976:0.392683:0.573171)	NA	NA	NA	NA
ABCA4	CHI&DIP	Spe33|Spe47	GMYN	1.33009	3.09848	0.429271	0.000244835	303	62.2592	240.741	NA	181	49.9041	131.096	NA	NA	1.69345	3.31196:0.901325:1:1:1:1	0.544554(0.460396:0.39604:0.777228)	NA	NA	NA	NA
ABCA4	CHI&PAU	Spe36|Spe51	GMYN	0.52711	4.84738	0.108741	3.3e-104	2766	641.089	2124.91	NA	1334	541.851	792.149	NA	NA	1.52844	1.21422:1.78062:1:1:1:1	0.446312(0.477766:0.355748:0.505423)	NA	NA	NA	NA
ABCA4	CHI&DIP	Spe40|Spe49	GMYN	0.548212	4.70807	0.116441	1.91e-58	2190	532.418	1657.58	NA	1048	413.082	634.918	NA	NA	1.55953	1.71516:1.68885:1:1:1:1	0.429452(0.532877:0.385616:0.369863)	NA	NA	NA	NA
ABCA4	DIP&DIP	Spe13|Spe48	GMYN	0.654889	4.83789	0.135367	1.09e-62	2802	633.034	2168.97	NA	1432	503.324	928.676	NA	NA	1.59992	1.06124:1.77223:1:1:1:1	0.421306(0.472163:0.377944:0.413812)	NA	NA	NA	NA
ABCA4	DIP&CHI	Spe17|Spe34	GMYN	0.713477	5.19839	0.13725	7.5e-78	4227	1023.71	3203.29	NA	2248	797.147	1450.85	NA	NA	1.79965	1.38211:1.72603:1:1:1:1	0.466643(0.479773:0.370476:0.549681)	NA	NA	NA	NA
ABCA4	PAU&CHI	Spe10|Spe40	GMYN	1.1208	4.69381	0.238783	3.07e-16	2082	522.388	1559.61	NA	1286	399.322	886.678	NA	NA	2.01729	1.497:1.93536:1:1:1:1	0.462056(0.519452:0.381124:0.485591)	NA	NA	NA	NA
ABCA4	CHI&CHI	Spe04|Spe36	GMYN	0.746773	4.84397	0.154165	8.39e-47	2658	638.187	2019.81	NA	1437	498.47	938.53	NA	NA	1.73051	1.3145:1.69515:1:1:1:1	0.456922(0.480813:0.375282:0.514673)	NA	NA	NA	NA
ABCA4	DIP&DIP	Spe46|Spe48	GMYN	0.320969	4.78951	0.067015	1.43e-206	2652	593.484	2058.52	NA	1083	552.605	530.395	NA	NA	1.32097	1.22122:2.48545:1:1:1:1	0.481335(0.479072:0.375:0.589932)	NA	NA	NA	NA
ABCA4	CHI&DIP	Spe02|Spe50	GMYN	0.727273	4.76192	0.152727	1.91e-37	2370	572.049	1797.95	NA	1257	433.623	823.377	NA	NA	1.70112	1.45254:1.74259:1:1:1:1	0.456751(0.468987:0.352532:0.548734)	NA	NA	NA	NA
ABCA4	CHI&CHI	Spe05|Spe33	GMYN	0.449989	5.29087	0.0850502	2.48e-156	4833	1158.05	3674.95	NA	2122	896.14	1225.86	NA	NA	1.60992	1.38359:1.92241:1:1:1:1	0.439685(0.458101:0.349162:0.511794)	NA	NA	NA	NA
ABCA4	PAU&DIP	Spe10|Spe46	GMYN	0.613837	4.74309	0.129417	1.61e-73	2601	557.868	2043.13	NA	1307	463.38	843.62	NA	NA	1.49949	1.2223:1.70381:1:1:1:1	0.530757(0.507497:0.404844:0.679931)	NA	NA	NA	NA
ABCA4	DIP&CHI	Spe16|Spe33	GMYN	0.817146	5.26746	0.155131	9.44e-81	4824	1122.47	3701.53	NA	2695	895.439	1799.56	NA	NA	1.85266	1.37374:2.24381:1:1:1:1	0.41024(0.438122:0.351057:0.441542)	NA	NA	NA	NA
ABCA4	CHI&CHI	Spe03|Spe05	GMYN	0.461527	5.10151	0.0904686	6.03e-180	4011	899.655	3111.34	NA	1831	774.925	1056.08	NA	NA	1.50226	1.09383:1.7154:1:1:1:1	0.403765(0.455123:0.356395:0.399776)	NA	NA	NA	NA
ABCA4	SYM&CHI	Spe07|Spe37	GMYN	0.817752	3.34549	0.244434	4.75e-09	351	86.5439	264.456	NA	201	72.2374	128.763	NA	NA	1.441	1.28496:1.04997:1:1:1:1	0.464387(0.512821:0.448718:0.431624)	NA	NA	NA	NA
ABCA4	CHI&SYM	Spe01|Spe52	GMYN	0.645261	5.22615	0.123468	2.93e-143	4692	1062.31	3629.69	NA	2447	903.832	1543.17	NA	NA	1.68242	1.02865:1.60324:1:1:1:1	0.482523(0.501598:0.369565:0.576407)	NA	NA	NA	NA
ABCA4	DIP&CHI	Spe15|Spe31	GMYN	0.893326	4.63121	0.192892	1.65e-45	2148	480.559	1667.44	NA	1259	409.882	849.118	NA	NA	1.72958	0.933157:1.53187:1:1:1:1	0.428305(0.48324:0.370112:0.431564)	NA	NA	NA	NA
ABCA4	CHI&DIP	Spe02|Spe14	GMYN	0.663319	3.81272	0.173976	1.7e-27	711	161.357	549.643	NA	381	143.408	237.592	NA	NA	1.37806	1.07173:1.58882:1:1:1:1	0.43038(0.481013:0.362869:0.447257)	NA	NA	NA	NA
ABCA4	CHI&DIP	Spe01|Spe17	GMYN	0.757482	5.29125	0.143157	1.17e-92	4890	1158.64	3731.36	NA	2671	925.612	1745.39	NA	NA	1.83172	1.26056:1.89666:1:1:1:1	0.450409(0.478221:0.362577:0.510429)	NA	NA	NA	NA
ABCA4	CHI&CHI	Spe03|Spe34	GMYN	0.546917	5.18973	0.105384	2.72e-106	4089	1011.96	3077.04	NA	1959	781.184	1177.82	NA	NA	1.69593	1.54149:1.78581:1:1:1:1	0.428344(0.468819:0.369039:0.447175)	NA	NA	NA	NA
ABCA4	CHI&CHI	Spe05|Spe32	GMYN	0.48076	4.79383	0.100287	3.76e-86	2502	596.914	1905.09	NA	1144	477.704	666.296	NA	NA	1.50975	1.59768:1.87062:1:1:1:1	0.411671(0.465228:0.345324:0.42446)	NA	NA	NA	NA
ABCA4	SYM&DIP	Spe07|Spe49	GMYN	0.777263	3.54138	0.21948	3.76e-30	576	112.375	463.625	NA	329	111.105	217.895	NA	NA	1.31653	0.458622:1.50967:1:1:1:1	0.461806(0.502604:0.398438:0.484375)	NA	NA	NA	NA
ABCA4	DIP&CHI	Spe13|Spe39	GMYN	1.04039	2.83586	0.366871	1.27e-09	1356	333.424	1022.58	NA	806	244.367	561.633	NA	NA	1.48188	1.14718:1.65349:1:1:1:1	0.485988(0.519912:0.431416:0.506637)	NA	NA	NA	NA
ABCA4	DIP&DIP	Spe12|Spe46	GMYN	0.935592	4.22879	0.221243	5.99e-25	1230	281.011	948.989	NA	735	238.96	496.04	NA	NA	1.68797	1.36249:1.79704:1:1:1:1	0.486585(0.502439:0.384146:0.573171)	NA	NA	NA	NA
ABCA4	CHI&CHI	Spe32|Spe36	GMYN	0.646068	4.72504	0.136733	5.62e-63	2406	544.601	1861.4	NA	1238	446.226	791.774	NA	NA	1.56935	1.21212:1.68033:1:1:1:1	0.416874(0.465087:0.355362:0.430175)	NA	NA	NA	NA
ABCA4	CHI&DIP	Spe02|Spe42	GMYN	1.07209	4.46612	0.240049	2.56e-13	1626	385.608	1240.39	NA	976	291.559	684.441	NA	NA	1.87699	0.799782:1.99277:1:1:1:1	0.46187(0.476015:0.365314:0.54428)	NA	NA	NA	NA
ABCA4	DIP&SYM	Spe12|Spe52	GMYN	0.879736	4.24557	0.207213	3.71e-33	1281	287.366	993.634	NA	756	252.54	503.46	NA	NA	1.63479	1.04015:1.3442:1:1:1:1	0.477752(0.507026:0.392272:0.533958)	NA	NA	NA	NA
ABCA4	DIP&CHI	Spe17|Spe35	GMYN	0.659802	4.91125	0.134345	1.61e-103	3201	698.075	2502.92	NA	1684	607.018	1076.98	NA	NA	1.58696	0.962638:1.46764:1:1:1:1	0.437207(0.468604:0.380506:0.462512)	NA	NA	NA	NA
ABCA4	CHI&DIP	Spe05|Spe50	GMYN	0.616726	5.30739	0.116201	6.14e-135	4971	1183.85	3787.15	NA	2529	962.236	1566.76	NA	NA	1.73381	1.22914:1.82489:1:1:1:1	0.456347(0.480688:0.365118:0.523235)	NA	NA	NA	NA
ABCA4	CHI&PAU	Spe40|Spe51	GMYN	0.960192	4.67862	0.20523	1.12e-42	2202	511.914	1690.09	NA	1329	435.018	893.982	NA	NA	1.82464	1.10355:1.50552:1:1:1:1	0.442325(0.51703:0.378065:0.43188)	NA	NA	NA	NA
ABCA4	DIP&CHI	Spe15|Spe39	GMYN	0.747619	4.80438	0.155612	1.35e-49	2460	605.369	1854.63	NA	1344	483.033	860.967	NA	NA	1.74593	1.51413:2.01942:1:1:1:1	0.437398(0.479878:0.376829:0.455488)	NA	NA	NA	NA
ABCA4	DIP&CHI	Spe14|Spe40	GMYN	0.785637	3.83401	0.204912	7.98e-24	813	166.005	646.995	NA	454	146.968	307.032	NA	NA	1.40808	0.880435:1.63728:1:1:1:1	0.424969(0.542435:0.376384:0.356089)	NA	NA	NA	NA
ABCA4	SYM&DIP	Spe09|Spe44	GMYN	0.69491	5.26745	0.131925	4.45e-102	4593	1122.45	3470.55	NA	2448	900.421	1547.58	NA	NA	1.81236	1.39792:1.61038:1:1:1:1	0.442304(0.48857:0.382756:0.455585)	NA	NA	NA	NA
ABCA4	CHI&DIP	Spe37|Spe48	GMYN	0.566694	4.07437	0.139088	1.02e-53	1089	228.718	860.282	NA	546	211.511	334.489	NA	NA	1.3034	0.850071:1.74435:1:1:1:1	0.418274(0.493113:0.370523:0.391185)	NA	NA	NA	NA
ABCA4	DIP&DIP	Spe11|Spe50	GMYN	0.696773	5.28586	0.131818	2.02e-86	4863	1150.34	3712.66	NA	2543	886.582	1656.42	NA	NA	1.78232	1.21954:1.79846:1:1:1:1	0.457125(0.496607:0.372301:0.502468)	NA	NA	NA	NA
ABCA4	SYM&DIP	Spe07|Spe48	GMYN	0.883149	3.7418	0.236023	6.47e-10	627	146.799	480.201	NA	360	115.651	244.349	NA	NA	1.55244	1.60499:1.69307:1:1:1:1	0.431419(0.430622:0.394737:0.4689)	NA	NA	NA	NA
ABCA4	CHI&DIP	Spe40|Spe47	GMYN	0.783076	3.15463	0.248231	8.11e-13	276	67.0992	208.901	NA	162	62.2209	99.7791	NA	NA	1.35963	1.92659:1.664:1:1:1:1	0.46558(0.483696:0.336957:0.576087)	NA	NA	NA	NA
ABCA4	CHI&SYM	Spe39|Spe52	GMYN	0.841123	4.70301	0.178848	1.67e-62	2433	528.835	1904.16	NA	1407	463.708	943.292	NA	NA	1.68054	0.992376:1.35457:1:1:1:1	0.502055(0.498767:0.392109:0.61529)	NA	NA	NA	NA
ABCA4	SYM&CHI	Spe07|Spe39	GMYN	1.02445	2.08947	0.490289	0.00213966	435	119.391	315.609	NA	257	84.0212	172.979	NA	NA	1.31675	2.94211:1.93115:1:1:1:1	0.478161(0.458621:0.427586:0.548276)	NA	NA	NA	NA
ABCA4	CHI&SYM	Spe01|Spe09	GMYN	0.610088	5.24144	0.116397	2.56e-136	4632	1084.19	3547.81	NA	2353	896.634	1456.37	NA	NA	1.69413	1.09195:1.57888:1:1:1:1	0.447323(0.475712:0.372085:0.494171)	NA	NA	NA	NA
ABCA4	CHI&DIP	Spe41|Spe46	GMYN	0.666679	4.62952	0.144006	1.45e-73	2373	479.477	1893.52	NA	1243	419.313	823.687	NA	NA	1.46739	1.57915:1.97918:1:1:1:1	0.524863(0.486094:0.375474:0.713021)	NA	NA	NA	NA
ABCA4	CHI&DIP	Spe01|Spe43	GMYN	0.729329	5.25728	0.138727	7.22e-93	4797	1107.33	3689.67	NA	2572	882.037	1689.96	NA	NA	1.77455	1.16503:1.75265:1:1:1:1	0.467897(0.490306:0.361476:0.551907)	NA	NA	NA	NA
ABCA4	CHI&DIP	Spe39|Spe43	GMYN	0.889544	4.70878	0.188912	3.94e-34	2364	532.919	1831.08	NA	1359	424.988	934.012	NA	NA	1.75052	1.15293:1.71279:1:1:1:1	0.508672(0.513959:0.39467:0.617386)	NA	NA	NA	NA
ABCA4	DIP&SYM	Spe50|Spe52	GMYN	0.593772	5.21374	0.113886	2.3e-167	4737	1044.88	3692.12	NA	2395	904.241	1490.76	NA	NA	1.61284	1.17889:1.69525:1:1:1:1	0.507705(0.5095:0.380937:0.632679)	NA	NA	NA	NA
ABCA4	DIP&PAU	Spe44|Spe51	GMYN	0.693166	5.27462	0.131415	2.77e-94	4833	1133.23	3699.77	NA	2535	889.533	1645.47	NA	NA	1.76742	1.24191:1.62738:1:1:1:1	0.441858(0.481688:0.369336:0.47455)	NA	NA	NA	NA
ABCA4	DIP&SYM	Spe17|Spe52	GMYN	0.617019	5.28268	0.1168	3.23e-172	5136	1145.48	3990.52	NA	2636	986.417	1649.58	NA	NA	1.6576	1.04688:1.94529:1:1:1:1	0.495911(0.502629:0.388435:0.596671)	NA	NA	NA	NA
ABCA4	CHI&DIP	Spe03|Spe44	GMYN	0.710318	5.12494	0.1386	2.09e-69	4044	928.211	3115.79	NA	2122	716.656	1405.34	NA	NA	1.7236	1.34218:1.85961:1:1:1:1	0.407641(0.474036:0.370549:0.378338)	NA	NA	NA	NA
ABCA4	SYM&DIP	Spe07|Spe16	GMYN	0.870544	3.69317	0.235717	9.13e-16	627	137.583	489.417	NA	366	119.412	246.588	NA	NA	1.48992	1.11368:1.22237:1:1:1:1	0.433812(0.437799:0.394737:0.4689)	NA	NA	NA	NA
ABCA4	CHI&DIP	Spe05|Spe14	GMYN	0.656792	3.89346	0.168691	1.77e-39	810	179.697	630.303	NA	439	168.695	270.305	NA	NA	1.37484	0.975939:1.70618:1:1:1:1	0.43642(0.494444:0.4:0.414815)	NA	NA	NA	NA
ABCA4	DIP&DIP	Spe44|Spe47	GMYN	0.309058	3.18003	0.0971871	8.93e-24	303	69.4105	233.59	NA	121	62.4666	58.5334	NA	NA	0.966733	2.40503:2.58881:1:1:1:1	0.488449(0.475248:0.341584:0.648515)	NA	NA	NA	NA
ABCA4	SYM&DIP	Spe09|Spe15	GMYN	1.05715	4.87535	0.216837	3.92e-27	2862	665.456	2196.54	NA	1735	519.198	1215.8	NA	NA	1.94494	1.17435:1.56984:1:1:1:1	0.418239(0.461216:0.37631:0.417191)	NA	NA	NA	NA
ABCA4	CHI&DIP	Spe33|Spe42	GMYN	1.0502	4.46579	0.235166	4.39e-15	1662	385.44	1276.56	NA	1000	296.56	703.44	NA	NA	1.84232	0.903018:2.18831:1:1:1:1	0.496089(0.473827:0.391697:0.622744)	NA	NA	NA	NA
ABCA4	DIP&CHI	Spe14|Spe32	GMYN	0.66363	3.35206	0.197977	0	465	87.306	377.694	NA	252	90.1408	161.859	NA	NA	1.1684	0.467975:1.38834:1:1:1:1	0.393548(0.516129:0.325806:0.33871)	NA	NA	NA	NA
ABCA4	DIP&DIP	Spe48|Spe49	GMYN	1.13722	4.61735	0.246294	1.28e-18	2088	471.758	1616.24	NA	1292	371.075	920.925	NA	NA	1.92352	1.42297:1.88858:1:1:1:1	0.402299(0.463362:0.374282:0.369253)	NA	NA	NA	NA
ABCA4	DIP&CHI	Spe12|Spe39	GMYN	0.990825	4.55581	0.217486	2.37e-25	1785	434.595	1350.4	NA	1079	351.926	727.074	NA	NA	1.85879	1.18223:1.69555:1:1:1:1	0.452101(0.486555:0.379832:0.489916)	NA	NA	NA	NA
ABCA4	DIP&CHI	Spe11|Spe34	GMYN	0.683478	5.17638	0.132038	1.64e-107	4215	994.098	3220.9	NA	2242	820.807	1421.19	NA	NA	1.74312	1.13297:1.37012:1:1:1:1	0.450652(0.491103:0.372598:0.488256)	NA	NA	NA	NA
ABCA4	CHI&DIP	Spe32|Spe43	GMYN	0.782122	4.78102	0.163589	6.37e-44	2508	586.805	1921.19	NA	1382	465.245	916.755	NA	NA	1.71776	1.36417:1.61642:1:1:1:1	0.435407(0.478469:0.367823:0.459928)	NA	NA	NA	NA
ABCA4	CHI&SYM	Spe01|Spe08	GMYN	0.694546	4.9251	0.141022	3.33e-63	3039	711.09	2327.91	NA	1599	564.393	1034.61	NA	NA	1.68445	1.05839:1.61233:1:1:1:1	0.456236(0.478282:0.365745:0.524679)	NA	NA	NA	NA
ABCA4	CHI&DIP	Spe39|Spe50	GMYN	0.982048	4.7398	0.207192	2.21e-49	2463	555.424	1907.58	NA	1503	480.327	1022.67	NA	NA	1.82945	1.15821:1.57989:1:1:1:1	0.486602(0.494519:0.379415:0.585871)	NA	NA	NA	NA
ABCA4	DIP&CHI	Spe15|Spe32	GMYN	0.98488	4.58943	0.214597	1.28e-25	2079	454.522	1624.48	NA	1235	363.73	871.27	NA	NA	1.77293	1.36186:1.68014:1:1:1:1	0.39418(0.474747:0.359307:0.348485)	NA	NA	NA	NA
ABCA4	SYM&PAU	Spe08|Spe10	GMYN	0.582907	5.03652	0.115736	1.5e-99	3489	824.975	2664.02	NA	1730	667.139	1062.86	NA	NA	1.63596	1.12514:1.68896:1:1:1:1	0.495557(0.505589:0.398968:0.582115)	NA	NA	NA	NA
ABCA4	CHI&DIP	Spe38|Spe43	GMYN	0.697986	4.67387	0.149338	2.83e-45	2145	508.685	1636.32	NA	1136	404.438	731.562	NA	NA	1.64086	1.40029:1.62713:1:1:1:1	0.449883(0.493007:0.368531:0.488112)	NA	NA	NA	NA
ABCA4	CHI&DIP	Spe03|Spe13	GMYN	0.780858	4.84654	0.161117	1.23e-56	2808	640.376	2167.62	NA	1555	523.732	1031.27	NA	NA	1.70805	1.11086:1.56761:1:1:1:1	0.415954(0.481303:0.379274:0.387286)	NA	NA	NA	NA
ABCA4	CHI&DIP	Spe02|Spe49	GMYN	0.74312	4.0223	0.18475	2.15e-20	945	213.377	731.623	NA	510	172.393	337.607	NA	NA	1.48354	1.03426:1.20827:1:1:1:1	0.43545(0.507937:0.37619:0.422222)	NA	NA	NA	NA
ABCA4	DIP&CHI	Spe11|Spe36	GMYN	0.724279	4.83366	0.149841	1.73e-52	2670	629.467	2040.53	NA	1432	499.886	932.114	NA	NA	1.69309	1.36808:1.51416:1:1:1:1	0.433708(0.48427:0.368539:0.448315)	NA	NA	NA	NA
ABCA4	CHI&CHI	Spe04|Spe32	GMYN	0.787134	4.78891	0.164366	1.61e-42	2478	593.012	1884.99	NA	1369	467.723	901.277	NA	NA	1.7448	1.31401:1.8605:1:1:1:1	0.432203(0.472155:0.372881:0.451574)	NA	NA	NA	NA
ABCA4	SYM&CHI	Spe07|Spe35	GMYN	1.19888	2.46084	0.487181	0.00392379	573	143.981	429.019	NA	355	103.927	251.073	NA	NA	1.51598	2.06242:1.95981:1:1:1:1	0.445899(0.463351:0.384817:0.489529)	NA	NA	NA	NA
ABCA4	CHI&SYM	Spe02|Spe07	GMYN	0.704069	3.54176	0.198791	5.48e-13	471	112.431	358.569	NA	252	92.1809	159.819	NA	NA	1.38145	1.58436:2.63449:1:1:1:1	0.455414(0.471338:0.401274:0.493631)	NA	NA	NA	NA
ABCA4	DIP&DIP	Spe43|Spe44	GMYN	0.439547	5.6123	0.0783184	0	7662	1777.69	5884.31	NA	3525	1595.51	1929.49	NA	NA	1.6397	1.05659:1.91112:1:1:1:1	0.462216(0.50137:0.373923:0.511355)	NA	NA	NA	NA
ABCA4	CHI&DIP	Spe38|Spe44	GMYN	0.715923	4.62357	0.154842	4.43e-55	2124	475.685	1648.32	NA	1146	400.347	745.653	NA	NA	1.59107	0.893241:1.55922:1:1:1:1	0.429849(0.497881:0.356638:0.435028)	NA	NA	NA	NA
ABCA4	DIP&DIP	Spe14|Spe46	GMYN	0.784229	3.64092	0.215393	1.32e-12	576	128.324	447.676	NA	317	104.657	212.343	NA	NA	1.42066	1.06324:2.27482:1:1:1:1	0.481771(0.518229:0.369792:0.557292)	NA	NA	NA	NA
ABCA4	DIP&SYM	Spe14|Spe52	GMYN	0.70349	3.87213	0.18168	9.8e-32	756	174.66	581.34	NA	419	159.508	259.492	NA	NA	1.43555	0.779044:1.30289:1:1:1:1	0.488757(0.543651:0.406746:0.515873)	NA	NA	NA	NA
ABCA4	CHI&DIP	Spe40|Spe50	GMYN	1.03573	4.52148	0.229068	3.51e-23	1914	415.149	1498.85	NA	1146	333.37	812.63	NA	NA	1.79179	0.789026:1.81743:1:1:1:1	0.446447(0.504702:0.380878:0.453762)	NA	NA	NA	NA
ABCA4	CHI&SYM	Spe33|Spe52	GMYN	0.654554	5.19216	0.126066	8.75e-138	4668	1015.24	3652.76	NA	2432	865.575	1566.43	NA	NA	1.64143	1.04194:1.62779:1:1:1:1	0.492288(0.484897:0.370501:0.621465)	NA	NA	NA	NA
ABCA4	CHI&CHI	Spe05|Spe36	GMYN	0.666422	4.8118	0.138497	1.06e-56	2679	611.389	2067.61	NA	1378	482.152	895.848	NA	NA	1.61246	1.16057:1.76682:1:1:1:1	0.429265(0.459127:0.353303:0.475364)	NA	NA	NA	NA
ABCA4	SYM&DIP	Spe09|Spe17	GMYN	0.738694	5.24995	0.140705	3.28e-86	4581	1096.56	3484.44	NA	2478	868.384	1609.62	NA	NA	1.81856	1.33833:1.59066:1:1:1:1	0.454813(0.470203:0.376555:0.517682)	NA	NA	NA	NA
ABCA4	CHI&DIP	Spe05|Spe43	GMYN	0.769168	5.49527	0.139969	3.99e-136	6579	1520.85	5058.15	NA	3629	1245.85	2383.15	NA	NA	1.86169	1.10253:1.96833:1:1:1:1	0.461012(0.487688:0.354537:0.540812)	NA	NA	NA	NA
ABCA4	PAU&CHI	Spe10|Spe32	GMYN	0.73508	4.81122	0.152784	1.04e-39	2469	610.919	1858.08	NA	1320	464.323	855.677	NA	NA	1.74366	1.40117:1.63546:1:1:1:1	0.445727(0.488457:0.373026:0.475699)	NA	NA	NA	NA
ABCA4	DIP&PAU	Spe50|Spe51	GMYN	0.504988	5.26999	0.0958235	2.03e-175	4962	1126.25	3835.75	NA	2321	931.098	1389.9	NA	NA	1.58652	1.09144:1.60348:1:1:1:1	0.475615(0.487001:0.373942:0.565901)	NA	NA	NA	NA
ABCA4	CHI&DIP	Spe34|Spe50	GMYN	0.421532	5.20571	0.080975	1.81e-195	4428	1033.75	3394.25	NA	1942	860.822	1081.18	NA	NA	1.53843	1.27168:1.81892:1:1:1:1	0.482272(0.490854:0.377033:0.57893)	NA	NA	NA	NA
ABCA4	DIP&DIP	Spe44|Spe48	GMYN	0.410702	5.31208	0.0773147	2.31e-243	5310	1191.27	4118.73	NA	2288	1003.26	1284.74	NA	NA	1.5103	1.39165:1.90013:1:1:1:1	0.40452(0.463559:0.369492:0.380508)	NA	NA	NA	NA
ABCA4	DIP&DIP	Spe43|Spe50	GMYN	0.670739	5.26541	0.127386	1.23e-108	4848	1119.39	3728.61	NA	2524	897.635	1626.37	NA	NA	1.73164	1.51085:2.18246:1:1:1:1	0.495153(0.501856:0.370978:0.612624)	NA	NA	NA	NA
ABCA4	CHI&SYM	Spe04|Spe52	GMYN	0.586346	5.06717	0.115715	3.86e-130	3657	859.396	2797.6	NA	1853	734.265	1118.73	NA	NA	1.63934	1.21579:1.90682:1:1:1:1	0.503555(0.513946:0.403199:0.593519)	NA	NA	NA	NA
ABCA4	CHI&CHI	Spe35|Spe38	GMYN	0.639823	4.62724	0.138273	2.22e-71	2145	478.022	1666.98	NA	1119	413.708	705.292	NA	NA	1.52844	1.25708:1.66356:1:1:1:1	0.404429(0.459441:0.357343:0.396503)	NA	NA	NA	NA
ABCA4	DIP&PAU	Spe14|Spe51	GMYN	0.629215	3.74247	0.168128	2.82e-30	678	146.931	531.069	NA	357	134.875	222.125	NA	NA	1.3039	0.967136:1.18428:1:1:1:1	0.445428(0.528761:0.369469:0.438053)	NA	NA	NA	NA
ABCA4	DIP&CHI	Spe14|Spe33	GMYN	0.612397	3.72523	0.164392	1.71e-20	654	143.591	510.409	NA	329	119.613	209.387	NA	NA	1.29585	0.938183:1.77294:1:1:1:1	0.449541(0.493119:0.394495:0.461009)	NA	NA	NA	NA
ABCA4	CHI&DIP	Spe36|Spe48	GMYN	0.797843	4.81704	0.165629	3.5e-57	2697	615.675	2081.32	NA	1511	510.632	1000.37	NA	NA	1.71535	1.28271:1.909:1:1:1:1	0.413793(0.453281:0.354839:0.433259)	NA	NA	NA	NA
ABCA4	CHI&DIP	Spe34|Spe47	GMYN	0.989464	3.13394	0.315725	0.000188061	303	65.2736	237.726	NA	179	51.5423	127.458	NA	NA	1.45144	2.00492:1.97724:1:1:1:1	0.49505(0.440594:0.341584:0.70297)	NA	NA	NA	NA
ABCA4	CHI&DIP	Spe37|Spe47	GMYN	0.771808	3.11279	0.247947	1.6e-10	279	63.4587	215.541	NA	159	57.115	101.885	NA	NA	1.30427	1.75592:1.25567:1:1:1:1	0.491039(0.451613:0.403226:0.61828)	NA	NA	NA	NA
ABCA4	PAU&DIP	Spe10|Spe47	GMYN	0.652361	3.094	0.210847	4.17e-22	303	61.8885	241.112	NA	165	62.2687	102.731	NA	NA	1.15107	0.918606:1.02968:1:1:1:1	0.511551(0.480198:0.381188:0.673267)	NA	NA	NA	NA
ABCA4	CHI&CHI	Spe02|Spe41	GMYN	0.972424	4.4722	0.217437	1.25e-18	1656	388.751	1267.25	NA	977	302.003	674.997	NA	NA	1.79401	1.25755:2.12753:1:1:1:1	0.43599(0.428442:0.32971:0.549819)	NA	NA	NA	NA
ABCA4	CHI&SYM	Spe05|Spe09	GMYN	0.631089	5.23833	0.120475	8.7e-145	4668	1079.7	3588.3	NA	2414	912.626	1501.37	NA	NA	1.69673	0.984293:1.89489:1:1:1:1	0.43916(0.464653:0.371465:0.481362)	NA	NA	NA	NA
ABCA4	CHI&DIP	Spe40|Spe43	GMYN	1.03466	4.61547	0.224171	1.74e-33	1980	470.579	1509.42	NA	1223	396.675	826.325	NA	NA	1.8857	1.06964:1.60998:1:1:1:1	0.47197(0.521212:0.37803:0.516667)	NA	NA	NA	NA
ABCA4	CHI&CHI	Spe31|Spe37	GMYN	0.529426	4.1371	0.12797	6.96e-45	1089	248.673	840.327	NA	528	214.281	313.719	NA	NA	1.35324	0.976811:1.57189:1:1:1:1	0.451331(0.515152:0.389807:0.449036)	NA	NA	NA	NA
ABCA4	CHI&DIP	Spe35|Spe47	GMYN	0.536886	3.19634	0.167969	2.26e-17	303	70.9366	232.063	NA	153	65.254	87.746	NA	NA	1.1595	1.63015:1.74865:1:1:1:1	0.470297(0.435644:0.361386:0.613861)	NA	NA	NA	NA
ABCA4	SYM&DIP	Spe09|Spe47	GMYN	1.1728	1.86945	0.627351	0.059273	303	76.1449	226.855	NA	180	52.3861	127.614	NA	NA	1.34787	3.17225:1.06224:1:1:1:1	0.483498(0.410891:0.371287:0.668317)	NA	NA	NA	NA
ABCA4	CHI&CHI	Spe36|Spe37	GMYN	0.410313	4.08672	0.100402	8.95e-48	1011	232.515	778.485	NA	437	194.36	242.64	NA	NA	1.25583	1.38014:1.58106:1:1:1:1	0.447577(0.514837:0.391691:0.436202)	NA	NA	NA	NA
ABCA4	CHI&SYM	Spe38|Spe52	GMYN	0.670956	4.63699	0.144696	4.37e-76	2139	484.278	1654.72	NA	1149	428.53	720.47	NA	NA	1.56888	0.955982:1.7728:1:1:1:1	0.478261(0.50561:0.368163:0.56101)	NA	NA	NA	NA
ABCA4	CHI&DIP	Spe01|Spe16	GMYN	0.802871	5.24223	0.153154	2.96e-94	4800	1085.33	3714.67	NA	2683	891.642	1791.36	NA	NA	1.80666	1.32403:2.00705:1:1:1:1	0.401562(0.452813:0.35375:0.398125)	NA	NA	NA	NA
ABCA4	DIP&CHI	Spe14|Spe39	GMYN	0.898911	3.91588	0.229555	1.39e-19	822	185.151	636.849	NA	484	159.339	324.661	NA	NA	1.57847	0.70543:0.989519:1:1:1:1	0.467762(0.532847:0.40146:0.468978)	NA	NA	NA	NA
ABCA4	SYM&CHI	Spe08|Spe36	GMYN	0.904066	4.53271	0.199454	5.09e-33	1866	421.411	1444.59	NA	1091	348.824	742.176	NA	NA	1.72355	1.01523:1.26241:1:1:1:1	0.467846(0.485531:0.379421:0.538585)	NA	NA	NA	NA
ABCA4	CHI&CHI	Spe03|Spe39	GMYN	1.09027	4.71329	0.231319	4.61e-24	2307	536.136	1770.86	NA	1409	424.015	984.985	NA	NA	1.93224	0.93376:1.98596:1:1:1:1	0.429996(0.463589:0.377113:0.449285)	NA	NA	NA	NA
ABCA4	CHI&DIP	Spe36|Spe43	GMYN	0.734464	4.79367	0.153215	1.14e-63	2685	596.785	2088.21	NA	1458	497.864	960.136	NA	NA	1.63669	1.14484:1.73379:1:1:1:1	0.459777(0.477654:0.373184:0.528492)	NA	NA	NA	NA
ABCA4	CHI&DIP	Spe03|Spe50	GMYN	0.545261	5.16504	0.105568	6.95e-139	4098	979.19	3118.81	NA	2001	810.159	1190.84	NA	NA	1.64913	1.32788:1.78434:1:1:1:1	0.437531(0.466691:0.372987:0.472914)	NA	NA	NA	NA
ABCA4	CHI&CHI	Spe37|Spe38	GMYN	0.16635	4.13834	0.0401973	4.21e-106	1119	249.082	869.918	NA	348	219.064	128.936	NA	NA	1.05049	1.05334:1.46417:1:1:1:1	0.440125(0.52681:0.376676:0.41689)	NA	NA	NA	NA
ABCA4	CHI&DIP	Spe04|Spe46	GMYN	0.420858	4.7873	0.0879115	6.14e-139	2691	591.736	2099.26	NA	1186	519.017	666.983	NA	NA	1.38101	1.51008:2.19707:1:1:1:1	0.521182(0.499443:0.396878:0.667224)	NA	NA	NA	NA
ABCA4	CHI&SYM	Spe36|Spe52	GMYN	0.627953	4.78513	0.13123	3.36e-104	2682	590.026	2091.97	NA	1401	527.405	873.595	NA	NA	1.54251	0.911933:1.72161:1:1:1:1	0.480239(0.496644:0.370246:0.573826)	NA	NA	NA	NA
ABCA4	CHI&DIP	Spe33|Spe43	GMYN	0.752774	5.275	0.142706	6.11e-84	4896	1133.8	3762.2	NA	2646	890.101	1755.9	NA	NA	1.80002	1.37351:2.00017:1:1:1:1	0.475184(0.478248:0.356924:0.59038)	NA	NA	NA	NA
ABCA4	SYM&DIP	Spe07|Spe12	GMYN	0.939233	3.44403	0.272713	7.96e-07	429	98.6954	330.305	NA	250	78.27	171.73	NA	NA	1.51548	1.48102:2.32514:1:1:1:1	0.454545(0.486014:0.381119:0.496503)	NA	NA	NA	NA
ABCA4	PAU&CHI	Spe10|Spe33	GMYN	0.722956	5.27197	0.137132	3.63e-74	4776	1129.22	3646.78	NA	2521	857.228	1663.77	NA	NA	1.79851	1.38474:1.64252:1:1:1:1	0.476759(0.478643:0.367776:0.583857)	NA	NA	NA	NA
ABCA4	CHI&SYM	Spe03|Spe09	GMYN	0.580134	5.16391	0.112344	7.73e-143	4089	977.714	3111.29	NA	2065	827.498	1237.5	NA	NA	1.67615	1.43809:1.7871:1:1:1:1	0.415383(0.459281:0.374908:0.411959)	NA	NA	NA	NA
ABCA4	CHI&DIP	Spe32|Spe42	GMYN	0.925937	3.82728	0.241931	8.9e-14	711	164.521	546.479	NA	420	136.863	283.137	NA	NA	1.59729	0.774074:1.57098:1:1:1:1	0.447257(0.525316:0.379747:0.436709)	NA	NA	NA	NA
ABCA4	SYM&DIP	Spe08|Spe44	GMYN	0.665599	5.0223	0.132529	1.19e-81	3417	809.483	2607.52	NA	1783	652.843	1130.16	NA	NA	1.6977	1.0559:1.84725:1:1:1:1	0.466345(0.500878:0.399034:0.499122)	NA	NA	NA	NA
ABCA4	CHI&CHI	Spe03|Spe41	GMYN	0.53367	4.89294	0.109069	6.35e-102	2811	681.242	2129.76	NA	1369	567.247	801.753	NA	NA	1.59013	1.43344:1.57502:1:1:1:1	0.430985(0.462113:0.373533:0.457311)	NA	NA	NA	NA
ABCA4	CHI&CHI	Spe03|Spe32	GMYN	0.486583	4.72546	0.10297	3.88e-96	2499	544.905	1954.1	NA	1148	458.275	689.725	NA	NA	1.41087	1.20819:1.39704:1:1:1:1	0.388555(0.456783:0.360144:0.348739)	NA	NA	NA	NA
ABCA4	CHI&DIP	Spe31|Spe46	GMYN	0.409825	4.70676	0.0870717	2.5e-160	2481	531.486	1949.51	NA	1103	495.694	607.306	NA	NA	1.33032	1.34632:2.05872:1:1:1:1	0.516324(0.500605:0.389964:0.658404)	NA	NA	NA	NA
ABCA4	PAU&DIP	Spe10|Spe14	GMYN	0.702217	3.94299	0.178093	2.06e-29	825	191.965	633.035	NA	452	169.044	282.956	NA	NA	1.4563	0.908375:1.71467:1:1:1:1	0.487273(0.529091:0.414545:0.518182)	NA	NA	NA	NA
ABCA4	CHI&DIP	Spe05|Spe17	GMYN	0.732825	5.44909	0.134486	1.96e-117	6192	1430.03	4761.97	NA	3311	1134.4	2176.6	NA	NA	1.82204	1.02677:1.97738:1:1:1:1	0.438146(0.474806:0.351017:0.488614)	NA	NA	NA	NA
ABCA4	DIP&DIP	Spe11|Spe44	GMYN	0.0276487	0.354903	0.0779048	7.87e-207	8841	2003.43	6837.57	NA	712	526.688	185.312	NA	NA	0.101807	1.17289:2.70574:1:1:1:1	0.417656(0.48507:0.367662:0.400238)	NA	NA	NA	NA
ABCA4	CHI&DIP	Spe32|Spe50	GMYN	0.606472	4.78061	0.126861	4.33e-98	2523	586.486	1936.51	NA	1308	515.927	792.073	NA	NA	1.57678	1.1236:1.72175:1:1:1:1	0.44669(0.479786:0.36742:0.492866)	NA	NA	NA	NA
ABCA4	CHI&DIP	Spe05|Spe49	GMYN	0.705685	4.68145	0.150741	4.89e-67	2244	513.851	1730.15	NA	1214	441.514	772.486	NA	NA	1.61609	0.990954:1.80805:1:1:1:1	0.431595(0.502674:0.377674:0.414439)	NA	NA	NA	NA
ABCA4	DIP&DIP	Spe12|Spe14	GMYN	0.833067	3.61646	0.230355	6.04e-09	549	124.206	424.794	NA	306	96.9838	209.016	NA	NA	1.46278	1.1257:1.8049:1:1:1:1	0.423497(0.519126:0.371585:0.379781)	NA	NA	NA	NA
ABCA4	DIP&CHI	Spe12|Spe40	GMYN	0.901937	3.92946	0.229532	1.52e-21	879	188.534	690.466	NA	516	164.348	351.652	NA	NA	1.5513	0.799362:1.28293:1:1:1:1	0.431172(0.52901:0.387372:0.377133)	NA	NA	NA	NA
ABCA4	CHI&CHI	Spe03|Spe36	GMYN	0.580781	4.79912	0.121018	3.76e-72	2607	601.137	2005.86	NA	1281	483.067	797.933	NA	NA	1.55347	1.29416:1.63715:1:1:1:1	0.408324(0.459724:0.36191:0.403337)	NA	NA	NA	NA
ABCA4	CHI&CHI	Spe34|Spe38	GMYN	0.618323	4.70375	0.131453	1.05e-61	2241	529.357	1711.64	NA	1139	430.27	708.73	NA	NA	1.58336	1.09399:1.93094:1:1:1:1	0.451584(0.502677:0.366131:0.485944)	NA	NA	NA	NA
ABCA4	PAU&DIP	Spe10|Spe11	GMYN	0.65596	5.35491	0.122497	7.08e-156	5328	1261.28	4066.72	NA	2808	1060.09	1747.91	NA	NA	1.76833	1.08953:1.65817:1:1:1:1	0.462838(0.5:0.385417:0.503097)	NA	NA	NA	NA
ABCA4	CHI&DIP	Spe01|Spe12	GMYN	0.884438	4.20031	0.210565	1.08e-16	1173	270.537	902.463	NA	670	212.236	457.764	NA	NA	1.6492	1.0245:1.52376:1:1:1:1	0.442455(0.540921:0.358056:0.428389)	NA	NA	NA	NA
ABCA4	CHI&SYM	Spe37|Spe52	GMYN	0.479622	4.1523	0.115507	4.91e-90	1095	253.763	841.237	NA	544	251	293	NA	NA	1.33076	1.00576:1.85786:1:1:1:1	0.488128(0.536986:0.40137:0.526027)	NA	NA	NA	NA
ABCA4	CHI&DIP	Spe01|Spe48	GMYN	0.791557	5.24575	0.150895	9.12e-88	4800	1090.44	3709.56	NA	2653	879.715	1773.29	NA	NA	1.80344	1.206:1.98626:1:1:1:1	0.4075(0.450937:0.350938:0.420625)	NA	NA	NA	NA
ABCA4	CHI&CHI	Spe33|Spe36	GMYN	0.644784	4.79223	0.134548	1.99e-65	2640	595.645	2044.35	NA	1351	482.288	868.712	NA	NA	1.58055	1.10658:1.53725:1:1:1:1	0.453598(0.46875:0.352841:0.539205)	NA	NA	NA	NA
ABCA4	DIP&DIP	Spe45|Spe49	GMYN	0.88644	4.32131	0.205132	9.97e-18	1311	317.902	993.098	NA	753	246.708	506.292	NA	NA	1.71935	1.10724:1.26746:1:1:1:1	0.45614(0.51373:0.395881:0.45881)	NA	NA	NA	NA
ABCA4	CHI&CHI	Spe02|Spe32	GMYN	0.752703	4.20486	0.179008	1.67e-21	1176	272.184	903.816	NA	635	213.788	421.212	NA	NA	1.5517	1.44445:1.54257:1:1:1:1	0.416241(0.501276:0.34949:0.397959)	NA	NA	NA	NA
ABCA4	DIP&DIP	Spe15|Spe45	GMYN	0.913841	4.68582	0.195023	1.04e-34	2265	516.852	1748.15	NA	1323	418.09	904.91	NA	NA	1.77457	1.15599:1.42163:1:1:1:1	0.431347(0.498013:0.371523:0.424503)	NA	NA	NA	NA
ABCA4	DIP&DIP	Spe42|Spe50	GMYN	0.967748	8.51307	0.113678	1.77e-15	1680	420.317	1259.68	NA	988	315.234	672.766	NA	NA	2.8555	1.44218:2.26537:1:1:1:1	0.498214(0.492857:0.408929:0.592857)	NA	NA	NA	NA
ABCA4	CHI&DIP	Spe39|Spe44	GMYN	0.861858	4.7817	0.180241	3.41e-32	2436	587.338	1848.66	NA	1382	453.2	928.8	NA	NA	1.80696	1.20806:1.5019:1:1:1:1	0.462849(0.498153:0.394704:0.49569)	NA	NA	NA	NA
ABCA4	PAU&DIP	Spe10|Spe49	GMYN	1.08138	4.71278	0.229456	1.32e-17	2160	535.771	1624.23	NA	1318	408.237	909.763	NA	NA	1.98212	1.2085:1.75051:1:1:1:1	0.477546(0.520833:0.390278:0.521528)	NA	NA	NA	NA
ABCA4	CHI&DIP	Spe31|Spe48	GMYN	0.477212	4.75225	0.100418	5.89e-98	2403	564.718	1838.28	NA	1110	472.297	637.703	NA	NA	1.48187	1.24979:2.37039:1:1:1:1	0.427799(0.466292:0.365169:0.451935)	NA	NA	NA	NA
ABCA4	CHI&DIP	Spe35|Spe43	GMYN	0.689374	4.92475	0.139981	2.73e-112	3204	710.76	2493.24	NA	1735	633.55	1101.45	NA	NA	1.62893	1.01393:1.83236:1:1:1:1	0.445537(0.476592:0.379213:0.480805)	NA	NA	NA	NA
ABCA4	SYM&CHI	Spe08|Spe41	GMYN	0.79415	4.45062	0.178436	9.99e-32	1647	377.721	1269.28	NA	916	306.144	609.856	NA	NA	1.63272	1.14517:1.72405:1:1:1:1	0.460838(0.466302:0.355191:0.56102)	NA	NA	NA	NA
ABCA4	CHI&CHI	Spe31|Spe35	GMYN	0.674013	4.77273	0.141222	1.09e-69	2493	580.352	1912.65	NA	1321	486.217	834.783	NA	NA	1.62816	1.29216:1.69566:1:1:1:1	0.423787(0.45728:0.377256:0.436823)	NA	NA	NA	NA
ABCA4	CHI&CHI	Spe04|Spe05	GMYN	0.620755	4.96531	0.125018	3.11e-109	3261	750.255	2510.75	NA	1684	642.713	1041.29	NA	NA	1.6203	1.02881:1.59492:1:1:1:1	0.452469(0.482521:0.369825:0.50506)	NA	NA	NA	NA
ABCA4	DIP&CHI	Spe16|Spe39	GMYN	0.954055	4.77238	0.199912	2.36e-23	2460	580.086	1879.91	NA	1430	438.144	991.856	NA	NA	1.85444	1.33946:1.44812:1:1:1:1	0.430081(0.464024:0.381098:0.445122)	NA	NA	NA	NA
ABCA4	CHI&CHI	Spe04|Spe31	GMYN	0.0335864	0.222589	0.15089	1.66e-34	2601	698.041	1902.96	NA	191	128.692	62.3082	NA	NA	0.0843098	2.64305:4.9919:1:1:1:1	0.46559(0.479815:0.38812:0.528835)	NA	NA	NA	NA
ABCA4	CHI&PAU	Spe02|Spe51	GMYN	0.777039	4.76018	0.163237	8.25e-40	2409	570.725	1838.27	NA	1318	445.835	872.165	NA	NA	1.7207	1.21122:1.55658:1:1:1:1	0.434205(0.460772:0.339352:0.502491)	NA	NA	NA	NA
ABCA4	DIP&DIP	Spe13|Spe14	GMYN	0.824182	3.52531	0.23379	8.74e-16	540	109.993	430.007	NA	306	97.5284	208.472	NA	NA	1.37438	0.613303:1.72017:1:1:1:1	0.425926(0.480556:0.366667:0.430556)	NA	NA	NA	NA
ABCA4	CHI&DIP	Spe38|Spe42	GMYN	0.870636	3.87553	0.22465	2.63e-12	735	175.454	559.546	NA	420	139.083	280.917	NA	NA	1.58794	0.866159:2.03713:1:1:1:1	0.470748(0.528571:0.369388:0.514286)	NA	NA	NA	NA
ABCA4	CHI&PAU	Spe05|Spe10	GMYN	0.635186	5.31087	0.119601	1.13e-125	5010	1189.34	3820.66	NA	2567	958.017	1608.98	NA	NA	1.74516	1.12957:1.59322:1:1:1:1	0.461078(0.484431:0.369162:0.529641)	NA	NA	NA	NA
ABCA4	CHI&CHI	Spe04|Spe33	GMYN	0.717149	5.00305	0.143342	2.06e-55	3279	788.973	2490.03	NA	1734	604.238	1129.76	NA	NA	1.7484	1.39438:1.99857:1:1:1:1	0.476517(0.488564:0.371455:0.569533)	NA	NA	NA	NA
ABCA4	PAU&DIP	Spe10|Spe43	GMYN	0.651897	5.3374	0.122138	3.04e-132	5430	1232.17	4197.83	NA	2799	1000.87	1798.13	NA	NA	1.71512	1.21091:1.92008:1:1:1:1	0.501657(0.504972:0.387569:0.612431)	NA	NA	NA	NA
ABCA4	CHI&CHI	Spe01|Spe40	GMYN	0.917838	4.58995	0.199967	1.14e-27	2010	454.832	1555.17	NA	1167	361.669	805.331	NA	NA	1.74878	1.12687:1.16804:1:1:1:1	0.425871(0.490299:0.367164:0.420149)	NA	NA	NA	NA
ABCA4	SYM&CHI	Spe09|Spe34	GMYN	0.487045	5.22916	0.0931402	8.41e-191	4377	1066.58	3310.42	NA	2080	910.175	1169.82	NA	NA	1.64259	1.34555:1.82831:1:1:1:1	0.461161(0.477724:0.377656:0.528101)	NA	NA	NA	NA
ABCA4	CHI&SYM	Spe03|Spe52	GMYN	0.603808	5.14738	0.117304	1.31e-146	4014	956.393	3057.61	NA	2074	826.505	1247.49	NA	NA	1.68638	1.13354:1.66541:1:1:1:1	0.451918(0.480942:0.379297:0.495516)	NA	NA	NA	NA
ABCA4	CHI&DIP	Spe01|Spe11	GMYN	0.670764	5.24734	0.127829	6.53e-100	4833	1092.76	3740.24	NA	2492	863.179	1628.82	NA	NA	1.70554	1.0367:1.65255:1:1:1:1	0.430788(0.487275:0.35599:0.4491)	NA	NA	NA	NA
ABCA4	SYM&CHI	Spe09|Spe39	GMYN	0.926946	2.89774	0.319886	2.09e-19	2316	546.137	1769.86	NA	1321	401.005	919.995	NA	NA	1.39168	1.1076:1.58404:1:1:1:1	0.459845(0.481218:0.387306:0.51101)	NA	NA	NA	NA
ABCA4	CHI&DIP	Spe37|Spe50	GMYN	0.407501	4.20026	0.0970182	2.2e-66	1116	270.52	845.48	NA	502	239.682	262.318	NA	NA	1.32687	1.47227:1.71706:1:1:1:1	0.477599(0.530914:0.389785:0.512097)	NA	NA	NA	NA
ABCA4	CHI&DIP	Spe04|Spe43	GMYN	0.398777	5.10194	0.0781619	2.29e-196	3792	900.169	2891.83	NA	1653	770.339	882.661	NA	NA	1.51524	1.39915:2.21209:1:1:1:1	0.489979(0.508703:0.396361:0.564873)	NA	NA	NA	NA
ABCA4	DIP&PAU	Spe15|Spe51	GMYN	1.13123	3.67558	0.307768	2.47e-17	2958	726.963	2231.04	NA	1818	541.166	1276.83	NA	NA	1.75653	1.64286:1.72483:1:1:1:1	0.422583(0.471095:0.36359:0.433063)	NA	NA	NA	NA
ABCA4	CHI&PAU	Spe32|Spe51	GMYN	0.655848	4.81089	0.136326	4.11e-48	2478	610.646	1867.35	NA	1268	465.875	802.125	NA	NA	1.67976	1.70058:2.127:1:1:1:1	0.426554(0.475182:0.3523:0.452179)	NA	NA	NA	NA
ABCA4	CHI&DIP	Spe39|Spe46	GMYN	0.861144	4.19688	0.205186	1.45e-36	1329	269.306	1059.69	NA	772	241.627	530.373	NA	NA	1.53709	1.08764:1.4206:1:1:1:1	0.530474(0.523702:0.399549:0.668172)	NA	NA	NA	NA
ABCA4	DIP&CHI	Spe11|Spe33	GMYN	0.751211	5.28623	0.142107	1.6e-91	4878	1150.91	3727.09	NA	2652	916.57	1735.43	NA	NA	1.8212	1.3024:1.95188:1:1:1:1	0.440242(0.474477:0.358856:0.487392)	NA	NA	NA	NA
ABCA4	DIP&DIP	Spe17|Spe45	GMYN	0.349426	5.22061	0.0669319	5.2e-292	4512	1054.5	3457.5	NA	1893	938.898	954.102	NA	NA	1.48787	1.15395:1.94141:1:1:1:1	0.466534(0.492354:0.38863:0.518617)	NA	NA	NA	NA
ABCA4	DIP&DIP	Spe16|Spe45	GMYN	0.416576	5.18896	0.0802813	1.05e-234	4314	1010.91	3303.09	NA	1930	888.983	1041.02	NA	NA	1.5349	1.43509:2.12769:1:1:1:1	0.418521(0.469402:0.376217:0.409944)	NA	NA	NA	NA
ABCA4	CHI&DIP	Spe41|Spe49	GMYN	1.17744	4.70594	0.250204	4.55e-15	2175	530.907	1644.09	NA	1361	406.179	954.821	NA	NA	2.03873	1.4462:1.65871:1:1:1:1	0.457931(0.494483:0.383448:0.495862)	NA	NA	NA	NA
ABCA4	SYM&DIP	Spe07|Spe47	GMYN	1.02555	2.82461	0.363075	7.31e-14	267	43.2134	223.787	NA	166	44.2587	121.741	NA	NA	1.31672	0.940869:1.25814:1:1:1:1	0.535581(0.483146:0.370787:0.752809)	NA	NA	NA	NA
ABCA4	DIP&DIP	Spe45|Spe47	GMYN	0.273432	3.06012	0.0893531	6.51e-31	303	59.1553	243.845	NA	114	58.6496	55.3504	NA	NA	0.817483	2.2072:2.73915:1:1:1:1	0.513201(0.475248:0.336634:0.727723)	NA	NA	NA	NA
ABCA4	SYM&CHI	Spe07|Spe38	GMYN	0.72087	3.65787	0.197074	3.89e-10	573	131.258	441.742	NA	301	99.9973	201.003	NA	NA	1.39365	1.12268:1.25147:1:1:1:1	0.468586(0.492147:0.376963:0.536649)	NA	NA	NA	NA
ABCA4	DIP&SYM	Spe45|Spe52	GMYN	0.631127	5.20124	0.121342	3.77e-138	4392	1027.6	3364.4	NA	2282	870.574	1411.43	NA	NA	1.7004	1.10137:1.83659:1:1:1:1	0.496926(0.512637:0.401639:0.576503)	NA	NA	NA	NA
ABCA4	DIP&CHI	Spe11|Spe38	GMYN	0.724834	4.64206	0.156145	3.34e-43	2130	487.557	1642.44	NA	1137	389.069	747.931	NA	NA	1.62149	0.992478:1.94243:1:1:1:1	0.432629(0.500704:0.36338:0.433803)	NA	NA	NA	NA
ABCA4	SYM&DIP	Spe07|Spe42	GMYN	0.657211	3.56762	0.184215	6.05e-23	522	116.377	405.623	NA	281	106.579	174.421	NA	NA	1.30607	0.755058:1.48494:1:1:1:1	0.5(0.477011:0.431034:0.591954)	NA	NA	NA	NA
ABCA4	CHI&DIP	Spe05|Spe46	GMYN	0.608798	4.72832	0.128756	2.56e-94	2568	546.987	2021.01	NA	1311	482.433	828.567	NA	NA	1.48626	1.11698:1.27986:1:1:1:1	0.504478(0.484813:0.382593:0.646028)	NA	NA	NA	NA
ABCA4	DIP&CHI	Spe16|Spe32	GMYN	0.816595	4.70606	0.17352	1.12e-44	2496	530.994	1965.01	NA	1389	432.531	956.469	NA	NA	1.64403	1.41202:1.92155:1:1:1:1	0.383814(0.451923:0.347957:0.351562)	NA	NA	NA	NA
ABCA4	DIP&DIP	Spe16|Spe17	GMYN	0.366791	5.41666	0.0677152	7.89e-268	5916	1369.52	4546.48	NA	2409	1109.22	1299.78	NA	NA	1.53581	1.43116:2.50538:1:1:1:1	0.414216(0.458418:0.366886:0.417343)	NA	NA	NA	NA
ABCA4	CHI&DIP	Spe01|Spe47	GMYN	0.802573	2.00938	0.399413	0.000992692	303	70.3793	232.621	NA	161	49.1624	111.838	NA	NA	1.08288	2.37642:1.38371:1:1:1:1	0.5(0.455446:0.366337:0.678218)	NA	NA	NA	NA
ABCA4	CHI&CHI	Spe33|Spe41	GMYN	0.597801	4.83053	0.123755	7.24e-82	2847	626.846	2220.15	NA	1417	517.318	899.682	NA	NA	1.52975	1.14836:1.66322:1:1:1:1	0.473832(0.472603:0.356164:0.592729)	NA	NA	NA	NA
ABCA4	DIP&DIP	Spe17|Spe46	GMYN	0.14829	4.8014	0.0308848	3.6e-221	2748	602.97	2145.03	NA	777	490.496	286.504	NA	NA	1.16928	1.81661:2.36209:1:1:1:1	0.522926(0.503821:0.394651:0.670306)	NA	NA	NA	NA
ABCA4	SYM&DIP	Spe08|Spe17	GMYN	0.65476	4.95118	0.132243	9.15e-100	3327	736.256	2590.74	NA	1736	627.012	1108.99	NA	NA	1.60555	0.859988:1.7126:1:1:1:1	0.476405(0.485573:0.38954:0.554103)	NA	NA	NA	NA
ABCA4	DIP&DIP	Spe43|Spe48	GMYN	0.3304	5.3544	0.0617064	0	5418	1260.42	4157.58	NA	2220	1123.3	1096.7	NA	NA	1.49916	1.31525:2.32324:1:1:1:1	0.440384(0.463732:0.370155:0.487265)	NA	NA	NA	NA
ABCA4	CHI&CHI	Spe33|Spe39	GMYN	1.07725	2.6718	0.403191	3.48e-13	2424	569.021	1854.98	NA	1454	414.658	1039.34	NA	NA	1.45156	1.6496:1.80322:1:1:1:1	0.476898(0.456683:0.373762:0.600248)	NA	NA	NA	NA
ABCA4	CHI&CHI	Spe32|Spe38	GMYN	0.405168	4.66022	0.0869419	3.77e-77	2130	499.508	1630.49	NA	890	386.29	503.71	NA	NA	1.40302	1.4516:2.06901:1:1:1:1	0.415493(0.478169:0.361972:0.406338)	NA	NA	NA	NA
ABCA4	CHI&DIP	Spe32|Spe47	GMYN	1.15673	3.22252	0.358952	0.000945986	303	73.4569	229.543	NA	186	56.9915	129.008	NA	NA	1.65755	2.386:0.97491:1:1:1:1	0.50165(0.455446:0.391089:0.658416)	NA	NA	NA	NA
ABCA4	CHI&DIP	Spe33|Spe46	GMYN	0.766701	4.66111	0.164489	1.73e-53	2364	500.104	1863.9	NA	1301	420.727	880.273	NA	NA	1.59056	1.73478:1.87025:1:1:1:1	0.523266(0.496827:0.364848:0.708122)	NA	NA	NA	NA
ABCA4	CHI&CHI	Spe01|Spe05	GMYN	0.462088	5.27402	0.0876158	2.71e-206	4875	1132.33	3742.67	NA	2227	954.779	1272.22	NA	NA	1.57977	1.15421:1.71685:1:1:1:1	0.429949(0.465538:0.352:0.472308)	NA	NA	NA	NA
ABCA4	CHI&CHI	Spe35|Spe37	GMYN	0.440948	4.08761	0.107874	7.76e-59	1080	232.791	847.209	NA	487	209.019	277.981	NA	NA	1.22698	1.14018:1.62358:1:1:1:1	0.41713(0.497222:0.386111:0.368056)	NA	NA	NA	NA
ABCA4	CHI&CHI	Spe32|Spe40	GMYN	0.9068	4.44764	0.203883	2.15e-37	1863	376.225	1486.78	NA	1079	321.815	757.185	NA	NA	1.62186	0.894247:1.82787:1:1:1:1	0.406065(0.492754:0.365539:0.359903)	NA	NA	NA	NA
ABCA4	DIP&PAU	Spe12|Spe51	GMYN	0.931991	4.55738	0.204502	3.58e-26	1881	435.504	1445.5	NA	1103	347.636	755.364	NA	NA	1.77137	1.34959:1.39981:1:1:1:1	0.428761(0.473684:0.357257:0.455343)	NA	NA	NA	NA
ABCA4	CHI&SYM	Spe31|Spe52	GMYN	0.633195	4.74072	0.133565	1.95e-95	2484	556.108	1927.89	NA	1305	495.492	809.508	NA	NA	1.55277	1.00721:1.97537:1:1:1:1	0.496779(0.503019:0.396739:0.59058)	NA	NA	NA	NA
ABCA4	DIP&CHI	Spe15|Spe34	GMYN	1.00059	4.64078	0.215609	8.21e-39	2148	486.731	1661.27	NA	1305	413.119	891.881	NA	NA	1.82545	0.835774:1.30273:1:1:1:1	0.438315(0.502095:0.368715:0.444134)	NA	NA	NA	NA
ABCA4	CHI&DIP	Spe40|Spe45	GMYN	0.953104	4.24835	0.224347	6.47e-28	1263	288.434	974.566	NA	762	249.473	512.527	NA	NA	1.70565	0.72751:1.29615:1:1:1:1	0.450515(0.503563:0.412114:0.435867)	NA	NA	NA	NA
ABCA4	SYM&CHI	Spe07|Spe41	GMYN	0.621574	3.67893	0.168955	2.69e-23	621	134.996	486.004	NA	320	118.385	201.615	NA	NA	1.2862	0.986436:1.39562:1:1:1:1	0.491948(0.507246:0.376812:0.591787)	NA	NA	NA	NA
ABCA4	CHI&CHI	Spe05|Spe31	GMYN	0.620579	4.70016	0.132033	2.13e-83	2343	526.833	1816.17	NA	1211	458.472	752.528	NA	NA	1.53789	0.976671:1.43033:1:1:1:1	0.451131(0.46735:0.370679:0.515365)	NA	NA	NA	NA
ABCA4	DIP&DIP	Spe12|Spe13	GMYN	0.935308	2.70481	0.345794	1.8e-10	1230	306.613	923.387	NA	708	223.717	484.283	NA	NA	1.37641	1.67153:1.58487:1:1:1:1	0.450407(0.506098:0.407317:0.437805)	NA	NA	NA	NA
ABCA4	DIP&DIP	Spe17|Spe47	GMYN	0.0797851	3.0818	0.0258891	7.29e-29	303	60.8902	242.11	NA	66	47.8	18.2	NA	NA	0.683064	3.3363:3.71101:1:1:1:1	0.519802(0.465347:0.346535:0.747525)	NA	NA	NA	NA
ABCA4	SYM&SYM	Spe09|Spe52	GMYN	0.622165	5.23412	0.118867	2.67e-135	4554	1073.65	3480.35	NA	2341	893.539	1447.46	NA	NA	1.70948	1.18838:1.87159:1:1:1:1	0.487813(0.498353:0.387022:0.578063)	NA	NA	NA	NA
ABCA4	CHI&CHI	Spe01|Spe35	GMYN	0.642709	4.81689	0.133428	5.46e-71	2733	615.554	2117.45	NA	1401	503.677	897.323	NA	NA	1.58286	1.08615:1.75418:1:1:1:1	0.419868(0.470362:0.355104:0.434138)	NA	NA	NA	NA
ABCA4	CHI&DIP	Spe32|Spe49	GMYN	1.1028	4.54338	0.242726	1.65e-21	1866	427.453	1438.55	NA	1157	346.068	810.932	NA	NA	1.89095	1.0951:1.21002:1:1:1:1	0.421222(0.483119:0.37299:0.407556)	NA	NA	NA	NA
ABCA4	DIP&DIP	Spe12|Spe47	GMYN	0.708581	3.17155	0.223418	6.41e-19	294	68.6305	225.369	NA	169	67.3379	101.662	NA	NA	1.28353	1.65474:1.33833:1:1:1:1	0.5(0.44898:0.403061:0.647959)	NA	NA	NA	NA
ABCA4	CHI&CHI	Spe05|Spe41	GMYN	0.615352	4.85541	0.126735	5.85e-91	2922	647.991	2274.01	NA	1485	547.639	937.361	NA	NA	1.55564	1.02503:1.76714:1:1:1:1	0.446783(0.458932:0.354209:0.527207)	NA	NA	NA	NA
ABCA4	DIP&CHI	Spe16|Spe41	GMYN	0.803365	4.88837	0.164342	8.66e-52	2880	677.108	2202.89	NA	1608	543.375	1064.62	NA	NA	1.76378	1.51985:1.95539:1:1:1:1	0.419792(0.451042:0.353646:0.454688)	NA	NA	NA	NA
ABCA4	DIP&DIP	Spe14|Spe50	GMYN	0.576966	3.78695	0.152356	1.07e-28	705	155.908	549.092	NA	354	136.711	217.289	NA	NA	1.28684	0.956561:1.1779:1:1:1:1	0.451064(0.53617:0.391489:0.425532)	NA	NA	NA	NA
ABCA4	CHI&SYM	Spe04|Spe07	GMYN	0.844804	3.6427	0.231917	1.35e-10	600	128.63	471.37	NA	337	103.271	233.729	NA	NA	1.44462	1.00536:1.52681:1:1:1:1	0.479167(0.4875:0.3625:0.5875)	NA	NA	NA	NA
ABCA4	DIP&DIP	Spe47|Spe48	GMYN	0.131188	3.1085	0.0422031	0	303	63.0965	239.904	NA	94	65.288	28.712	NA	NA	0.751181	1.51436:2.03919:1:1:1:1	0.480198(0.430693:0.346535:0.663366)	NA	NA	NA	NA
ABCA4	CHI&CHI	Spe03|Spe40	GMYN	0.942488	4.62019	0.203993	1.03e-27	2166	473.545	1692.45	NA	1264	376.359	887.641	NA	NA	1.74653	1.28449:1.51473:1:1:1:1	0.4012(0.496537:0.372576:0.334488)	NA	NA	NA	NA
ABCA4	CHI&CHI	Spe33|Spe40	GMYN	1.0525	4.63242	0.227203	1.11e-20	1983	481.334	1501.67	NA	1208	377.753	830.247	NA	NA	1.92145	1.55375:1.76928:1:1:1:1	0.427887(0.476551:0.371407:0.435703)	NA	NA	NA	NA
ABCA4	CHI&DIP	Spe02|Spe44	GMYN	0.822381	4.77967	0.172058	4.29e-45	2466	585.753	1880.25	NA	1392	473.078	918.922	NA	NA	1.76236	1.16324:2.2252:1:1:1:1	0.434509(0.47871:0.364964:0.459854)	NA	NA	NA	NA
ABCA4	DIP&DIP	Spe43|Spe47	GMYN	0.106931	2.92096	0.0366082	0	303	49.1371	253.863	NA	86	60.8359	25.1641	NA	NA	0.563279	1.2372:2.44956:1:1:1:1	0.511551(0.450495:0.346535:0.737624)	NA	NA	NA	NA
ABCA4	CHI&CHI	Spe37|Spe39	GMYN	0.813248	4.16534	0.195242	3.83e-26	1110	258.213	851.787	NA	631	217.311	413.689	NA	NA	1.59303	0.91258:1.24788:1:1:1:1	0.468468(0.518919:0.401351:0.485135)	NA	NA	NA	NA
ABCA4	CHI&DIP	Spe05|Spe42	GMYN	0.679443	4.55188	0.149266	1.89e-53	1758	432.322	1325.68	NA	946	365.556	580.444	NA	NA	1.63174	0.852769:1.9625:1:1:1:1	0.457053(0.47099:0.387372:0.512799)	NA	NA	NA	NA
ABCA4	DIP&PAU	Spe13|Spe51	GMYN	0.812407	3.67707	0.220939	7.39e-35	2925	723.77	2201.23	NA	1611	538.797	1072.2	NA	NA	1.52125	1.50968:1.63861:1:1:1:1	0.450427(0.484615:0.37641:0.490256)	NA	NA	NA	NA
ABCA4	CHI&CHI	Spe33|Spe35	GMYN	0.685526	4.82455	0.142091	1.66e-76	2709	621.874	2087.13	NA	1446	525.703	920.297	NA	NA	1.63567	1.19833:1.60343:1:1:1:1	0.430971(0.457364:0.347176:0.488372)	NA	NA	NA	NA
ABCA4	CHI&DIP	Spe04|Spe47	GMYN	0.279949	2.9587	0.0946189	0	303	51.6732	251.327	NA	114	55.8785	58.1215	NA	NA	0.73678	1.36754:2.74794:1:1:1:1	0.529703(0.470297:0.361386:0.757426)	NA	NA	NA	NA
ABCA4	PAU&CHI	Spe10|Spe36	GMYN	0.690278	4.859	0.142062	4.3e-71	2703	651.098	2051.9	NA	1450	539.595	910.405	NA	NA	1.69444	1.27721:1.76084:1:1:1:1	0.466519(0.486127:0.376804:0.536626)	NA	NA	NA	NA
ABCA4	DIP&CHI	Spe15|Spe40	GMYN	1.08875	4.50297	0.241785	6.04e-23	1836	405.028	1430.97	NA	1132	331.868	800.132	NA	NA	1.84194	1.18465:1.61845:1:1:1:1	0.406863(0.494281:0.383987:0.34232)	NA	NA	NA	NA
ABCA4	CHI&DIP	Spe39|Spe49	GMYN	0.963645	4.1672	0.231245	1.89e-20	1134	258.853	875.147	NA	679	216.592	462.408	NA	NA	1.69491	1.01701:1.53808:1:1:1:1	0.461199(0.5:0.406085:0.477513)	NA	NA	NA	NA
ABCA4	CHI&DIP	Spe02|Spe47	GMYN	0.767545	2.89174	0.265426	1.17e-09	276	47.2598	228.74	NA	151	43.2069	107.793	NA	NA	1.13127	1.63095:3.00317:1:1:1:1	0.5(0.467391:0.304348:0.728261)	NA	NA	NA	NA
ABCA4	CHI&CHI	Spe31|Spe36	GMYN	0.753858	4.69783	0.160469	1.11e-44	2220	525.198	1694.8	NA	1214	422.278	791.722	NA	NA	1.68691	1.27304:1.52599:1:1:1:1	0.453829(0.472973:0.369595:0.518919)	NA	NA	NA	NA
ABCA4	CHI&SYM	Spe02|Spe08	GMYN	0.771192	4.73588	0.16284	2.44e-42	2295	552.531	1742.47	NA	1262	438.498	823.502	NA	NA	1.72571	1.261:1.50437:1:1:1:1	0.444662(0.475817:0.352941:0.505229)	NA	NA	NA	NA
ABCA4	CHI&DIP	Spe34|Spe48	GMYN	0.825743	5.20803	0.158552	2.04e-53	4248	1036.95	3211.05	NA	2361	785.118	1575.88	NA	NA	1.89547	1.46179:2.0181:1:1:1:1	0.427495(0.461158:0.361935:0.459393)	NA	NA	NA	NA
ABCA4	CHI&DIP	Spe01|Spe45	GMYN	0.663451	5.12726	0.129397	3.53e-78	3921	931.075	2989.92	NA	2015	722.114	1292.89	NA	NA	1.72342	1.1084:1.79181:1:1:1:1	0.454221(0.49847:0.370696:0.493497)	NA	NA	NA	NA
ABCA4	CHI&CHI	Spe01|Spe37	GMYN	0.169147	4.14478	0.0408098	2.45e-83	1122	251.231	870.769	NA	331	200.069	130.931	NA	NA	1.05934	0.935219:1.60205:1:1:1:1	0.448307(0.529412:0.377005:0.438503)	NA	NA	NA	NA
ABCA4	SYM&CHI	Spe07|Spe40	GMYN	0.74725	3.59985	0.207578	1.89e-18	564	121.486	442.514	NA	312	107.396	204.604	NA	NA	1.3617	0.782897:1.56201:1:1:1:1	0.466312(0.529255:0.420213:0.449468)	NA	NA	NA	NA
ABCA4	CHI&SYM	Spe02|Spe52	GMYN	0.766529	4.76627	0.160824	4.75e-38	2415	575.377	1839.62	NA	1312	443.899	868.101	NA	NA	1.71947	1.37091:1.85529:1:1:1:1	0.47205(0.478261:0.364596:0.573292)	NA	NA	NA	NA
ABCA4	SYM&PAU	Spe09|Spe10	GMYN	0.689456	5.28422	0.130475	9.32e-121	4653	1147.82	3505.18	NA	2502	947.019	1554.98	NA	NA	1.82291	1.31684:1.70103:1:1:1:1	0.474425(0.48775:0.385558:0.549968)	NA	NA	NA	NA
ABCA4	CHI&CHI	Spe01|Spe38	GMYN	0.0800332	1.19129	0.0671822	1.05e-110	2319	566.248	1752.75	NA	429	296.354	132.646	NA	NA	0.351376	1.51602:2.04569:1:1:1:1	0.438335(0.491591:0.365459:0.457956)	NA	NA	NA	NA
ABCA4	CHI&CHI	Spe02|Spe37	GMYN	0.772023	4.11276	0.187714	3.52e-19	1083	240.731	842.269	NA	587	189.858	397.142	NA	NA	1.51461	1.08987:1.33769:1:1:1:1	0.430286(0.498615:0.358726:0.433518)	NA	NA	NA	NA
ABCA4	DIP&DIP	Spe14|Spe43	GMYN	0.481507	4.00924	0.120099	1.21e-35	834	209.695	624.305	NA	394	174.895	219.105	NA	NA	1.36849	1.85494:1.68484:1:1:1:1	0.494005(0.539568:0.404676:0.53777)	NA	NA	NA	NA
ABCA4	DIP&DIP	Spe12|Spe17	GMYN	0.822725	4.48346	0.183503	2.5e-22	1692	394.627	1297.37	NA	936	300.754	635.246	NA	NA	1.67652	1.32767:2.05391:1:1:1:1	0.434988(0.468085:0.385638:0.451241)	NA	NA	NA	NA
ABCA4	CHI&CHI	Spe38|Spe39	GMYN	0.764991	4.30998	0.177493	4.01e-32	1368	313.138	1054.86	NA	757	260.708	496.292	NA	NA	1.57645	1.22641:1.54645:1:1:1:1	0.452485(0.47807:0.380482:0.498904)	NA	NA	NA	NA
ABCA4	CHI&DIP	Spe02|Spe13	GMYN	0.683085	4.2149	0.162064	5.88e-40	1224	275.853	948.147	NA	656	239.937	416.063	NA	NA	1.47905	0.852441:1.35043:1:1:1:1	0.448938(0.5:0.395833:0.45098)	NA	NA	NA	NA
ABCA4	CHI&DIP	Spe05|Spe45	GMYN	0.665656	5.10498	0.130394	1.35e-99	3918	903.823	3014.18	NA	2046	741.108	1304.89	NA	NA	1.68974	1.03266:1.55101:1:1:1:1	0.440658(0.482006:0.36294:0.477029)	NA	NA	NA	NA
ABCA4	CHI&DIP	Spe37|Spe42	GMYN	1.03239	3.93133	0.262605	3.56e-07	756	189.006	566.994	NA	453	142.094	310.906	NA	NA	1.75715	1.16278:1.92021:1:1:1:1	0.48545(0.521825:0.410714:0.52381)	NA	NA	NA	NA
ABCA4	CHI&PAU	Spe05|Spe51	GMYN	0.626182	5.27292	0.118754	1.59e-97	4881	1130.66	3750.34	NA	2429	865.235	1563.76	NA	NA	1.70257	1.17868:1.72782:1:1:1:1	0.439664(0.465888:0.356792:0.496312)	NA	NA	NA	NA
ABCA4	DIP&CHI	Spe14|Spe34	GMYN	0.64307	3.78848	0.169743	2.5e-27	696	156.226	539.774	NA	367	138.544	228.456	NA	NA	1.3491	0.866127:0.969708:1:1:1:1	0.462644(0.519397:0.394397:0.474138)	NA	NA	NA	NA
ABCA4	CHI&CHI	Spe36|Spe40	GMYN	1.01625	4.59056	0.221377	1.35e-34	2112	455.205	1656.8	NA	1283	384.58	898.42	NA	NA	1.78663	0.891051:1.44593:1:1:1:1	0.43608(0.513494:0.378551:0.416193)	NA	NA	NA	NA
ABCA4	DIP&DIP	Spe45|Spe48	GMYN	0.41152	5.19347	0.0792379	2.59e-208	4338	1017.02	3320.98	NA	1898	860.944	1037.06	NA	NA	1.53262	1.31887:2.02995:1:1:1:1	0.423928(0.467842:0.374827:0.429115)	NA	NA	NA	NA
ABCA4	SYM&DIP	Spe07|Spe14	GMYN	1.27733	3.72451	0.342953	8.56e-05	591	143.454	447.546	NA	380	111.035	268.965	NA	NA	1.87134	1.60431:1.70746:1:1:1:1	0.478849(0.517766:0.408629:0.510152)	NA	NA	NA	NA
ABCA4	CHI&DIP	Spe37|Spe43	GMYN	0.517798	4.09671	0.126394	3.76e-55	1071	235.635	835.365	NA	522	215.112	306.888	NA	NA	1.30521	1.03286:1.61383:1:1:1:1	0.443511(0.516807:0.40056:0.413165)	NA	NA	NA	NA
ABCA4	PAU&CHI	Spe10|Spe37	GMYN	0.579904	4.17545	0.138884	3.26e-44	1101	261.718	839.282	NA	560	227.251	332.749	NA	NA	1.4346	1.06831:1.65243:1:1:1:1	0.470027(0.521798:0.395095:0.493188)	NA	NA	NA	NA
ABCA4	SYM&CHI	Spe08|Spe37	GMYN	0.757076	4.11033	0.184189	9.38e-28	1116	239.952	876.048	NA	610	202.834	407.166	NA	NA	1.47806	0.60553:1.07183:1:1:1:1	0.458333(0.524194:0.387097:0.46371)	NA	NA	NA	NA
ABCA4	CHI&DIP	Spe03|Spe11	GMYN	0.704358	5.11945	0.137585	2.01e-69	4047	921.433	3125.57	NA	2113	710.074	1402.93	NA	NA	1.7096	1.33897:1.8297:1:1:1:1	0.405856(0.472943:0.369162:0.375463)	NA	NA	NA	NA
ABCA4	DIP&DIP	Spe11|Spe14	GMYN	0.358017	3.90362	0.0917142	1.94e-50	771	182.149	588.851	NA	327	161.362	165.638	NA	NA	1.19566	1.68197:1.97551:1:1:1:1	0.439689(0.521401:0.40856:0.389105)	NA	NA	NA	NA
ABCA4	DIP&CHI	Spe16|Spe40	GMYN	0.991007	4.49989	0.220229	7.63e-33	2001	403.368	1597.63	NA	1188	339.524	848.476	NA	NA	1.69834	0.986213:1.92295:1:1:1:1	0.392304(0.473013:0.381559:0.322339)	NA	NA	NA	NA
ABCA4	CHI&DIP	Spe32|Spe45	GMYN	0.774374	4.77708	0.162102	2.41e-46	2487	583.734	1903.27	NA	1368	466.393	901.607	NA	NA	1.71387	1.18623:1.75385:1:1:1:1	0.430438(0.485525:0.365501:0.44029)	NA	NA	NA	NA
ABCA4	CHI&DIP	Spe37|Spe46	GMYN	0.526982	4.13947	0.127307	1.08e-52	1074	249.459	824.541	NA	531	223.524	307.476	NA	NA	1.36606	1.38643:1.52288:1:1:1:1	0.502328(0.51676:0.399441:0.590782)	NA	NA	NA	NA
ABCA4	CHI&DIP	Spe01|Spe15	GMYN	1.04971	4.9079	0.213882	1.79e-32	2958	694.966	2263.03	NA	1803	552.905	1250.09	NA	NA	1.95617	1.21536:1.6152:1:1:1:1	0.41616(0.465517:0.369675:0.413286)	NA	NA	NA	NA
ABCA4	CHI&DIP	Spe36|Spe45	GMYN	0.733558	4.84711	0.151339	2.41e-60	2667	640.86	2026.14	NA	1456	523.223	932.777	NA	NA	1.72201	1.36388:1.53553:1:1:1:1	0.451256(0.490439:0.373453:0.489876)	NA	NA	NA	NA
ABCA4	DIP&DIP	Spe17|Spe44	GMYN	0.419223	5.54794	0.0755637	0	7053	1631.5	5421.5	NA	3116	1400	1716	NA	NA	1.6056	1.09278:2.02339:1:1:1:1	0.441514(0.489154:0.376861:0.458528)	NA	NA	NA	NA
ABCA4	DIP&DIP	Spe13|Spe17	GMYN	0.597208	4.87428	0.122522	3.67e-83	2859	664.506	2194.49	NA	1433	544.573	888.427	NA	NA	1.59131	1.07085:1.66136:1:1:1:1	0.459601(0.491081:0.39297:0.494753)	NA	NA	NA	NA
ABCA4	CHI&PAU	Spe39|Spe51	GMYN	0.968402	2.09904	0.461355	3.54e-13	2274	584.346	1689.65	NA	1314	411.575	902.425	NA	NA	1.25894	1.97649:1.65902:1:1:1:1	0.468338(0.477573:0.377309:0.550132)	NA	NA	NA	NA
ABCA4	CHI&DIP	Spe33|Spe44	GMYN	0.708541	5.30337	0.133602	3.6e-96	4887	1177.51	3709.49	NA	2597	927.523	1669.48	NA	NA	1.81565	1.3621:2.11071:1:1:1:1	0.441989(0.474831:0.361878:0.489257)	NA	NA	NA	NA
ABCA4	SYM&DIP	Spe07|Spe50	GMYN	0.483604	3.65505	0.132311	5.77e-28	624	130.765	493.235	NA	287	113.515	173.485	NA	NA	1.14821	1.00293:1.20518:1:1:1:1	0.500801(0.490385:0.389423:0.622596)	NA	NA	NA	NA
ABCA4	CHI&DIP	Spe03|Spe47	GMYN	1.01806	3.23857	0.314356	4.37e-06	300	75.045	224.955	NA	185	62.134	122.866	NA	NA	1.57352	2.3199:2.59149:1:1:1:1	0.453333(0.42:0.36:0.58)	NA	NA	NA	NA
ABCA4	CHI&DIP	Spe31|Spe42	GMYN	0.930576	4.00849	0.232152	3.56e-11	900	209.484	690.516	NA	520	161.45	358.55	NA	NA	1.64699	0.770456:1.79507:1:1:1:1	0.483889(0.516667:0.388333:0.546667)	NA	NA	NA	NA
ABCA4	CHI&DIP	Spe03|Spe14	GMYN	0.601675	3.65702	0.164526	2.69e-31	636	131.109	504.891	NA	327	122.682	204.318	NA	NA	1.23152	0.829864:1.71368:1:1:1:1	0.413522(0.502358:0.375:0.363208)	NA	NA	NA	NA
ABCA4	CHI&CHI	Spe01|Spe34	GMYN	0.578253	5.188	0.11146	2.09e-138	4278	1009.62	3268.38	NA	2138	840.828	1297.17	NA	NA	1.66617	1.13797:1.58946:1:1:1:1	0.458742(0.48913:0.363604:0.523492)	NA	NA	NA	NA
ABCA4	CHI&SYM	Spe34|Spe52	GMYN	0.597139	5.14385	0.116088	6.21e-143	4239	951.907	3287.09	NA	2145	813.538	1331.46	NA	NA	1.61815	1.05496:1.71526:1:1:1:1	0.499528(0.504246:0.380042:0.614296)	NA	NA	NA	NA
ABCA4	CHI&CHI	Spe34|Spe41	GMYN	0.286874	4.96323	0.0577999	7.25e-178	3129	748.179	2380.82	NA	1168	606.173	561.827	NA	NA	1.40504	1.46177:2.11042:1:1:1:1	0.471716(0.485618:0.363854:0.565676)	NA	NA	NA	NA
ABCA4	CHI&DIP	Spe33|Spe45	GMYN	0.687862	5.1096	0.134622	9.43e-99	3894	909.414	2984.59	NA	2072	751.786	1320.21	NA	NA	1.72053	1.14239:1.84758:1:1:1:1	0.464047(0.479584:0.366333:0.546225)	NA	NA	NA	NA
ABCA4	CHI&CHI	Spe02|Spe04	GMYN	0.859093	4.68499	0.183371	9.88e-26	2100	516.282	1583.72	NA	1184	391.157	792.843	NA	NA	1.79969	1.43448:2.38964:1:1:1:1	0.453333(0.476429:0.349286:0.534286)	NA	NA	NA	NA
ABCA4	DIP&DIP	Spe15|Spe42	GMYN	0.805796	4.5779	0.176019	6.44e-38	1785	447.583	1337.42	NA	1016	367.347	648.653	NA	NA	1.75164	1.28606:1.8313:1:1:1:1	0.448739(0.489916:0.381513:0.47479)	NA	NA	NA	NA
ABCA4	CHI&DIP	Spe32|Spe44	GMYN	0.758334	4.76243	0.159233	8.43e-49	2493	572.437	1920.56	NA	1360	460.994	899.006	NA	NA	1.67775	1.25232:1.84825:1:1:1:1	0.416165(0.484356:0.360409:0.40373)	NA	NA	NA	NA
ABCA4	DIP&DIP	Spe42|Spe46	GMYN	0.816336	3.88226	0.210273	3.9e-18	864	177.036	686.964	NA	482	147.877	334.123	NA	NA	1.44455	0.937733:1.39766:1:1:1:1	0.521412(0.520833:0.387153:0.65625)	NA	NA	NA	NA
ABCA4	SYM&CHI	Spe07|Spe32	GMYN	0.817919	3.63198	0.225199	1.03e-18	591	126.803	464.197	NA	339	113.637	225.363	NA	NA	1.4217	0.872331:1.47125:1:1:1:1	0.461083(0.48731:0.375635:0.520305)	NA	NA	NA	NA
ABCA4	DIP&DIP	Spe14|Spe44	GMYN	0.371157	3.93224	0.0943882	7.13e-41	768	189.234	578.766	NA	325	157.591	167.409	NA	NA	1.2486	1.83222:2.07467:1:1:1:1	0.448568(0.525391:0.408203:0.412109)	NA	NA	NA	NA
ABCA4	DIP&DIP	Spe12|Spe15	GMYN	0.90682	4.42255	0.205045	4.49e-29	1641	363.846	1277.15	NA	959	301.625	657.375	NA	NA	1.68633	1.19301:1.58437:1:1:1:1	0.400366(0.471664:0.372029:0.357404)	NA	NA	NA	NA
ABCA4	CHI&DIP	Spe04|Spe15	GMYN	0.92525	4.64948	0.199001	3.48e-47	2199	492.406	1706.59	NA	1310	424.584	885.416	NA	NA	1.75919	1.00627:1.40271:1:1:1:1	0.429286(0.478854:0.37176:0.437244)	NA	NA	NA	NA
ABCA4	DIP&SYM	Spe43|Spe52	GMYN	0.610928	5.25354	0.116289	1.96e-168	5190	1101.82	4088.18	NA	2627	947.748	1679.25	NA	NA	1.59654	1.03664:1.87859:1:1:1:1	0.515896(0.517341:0.389595:0.640751)	NA	NA	NA	NA
ABCA4	CHI&DIP	Spe01|Spe49	GMYN	1.08331	4.35028	0.249021	1.39e-14	2103	500.185	1602.82	NA	1272	374.003	897.997	NA	NA	1.86034	1.35417:1.48785:1:1:1:1	0.437708(0.489301:0.379458:0.444365)	NA	NA	NA	NA
ABCA4	DIP&DIP	Spe16|Spe50	GMYN	0.772566	5.29804	0.145821	2.97e-80	4875	1169.18	3705.82	NA	2668	913.975	1754.03	NA	NA	1.85792	1.46951:2.00075:1:1:1:1	0.429231(0.466769:0.361846:0.459077)	NA	NA	NA	NA
ABCA4	CHI&DIP	Spe38|Spe50	GMYN	0.581367	4.70677	0.123517	7.27e-79	2250	531.497	1718.5	NA	1136	450.912	685.088	NA	NA	1.55587	1.25928:1.47729:1:1:1:1	0.472667(0.497333:0.380667:0.54)	NA	NA	NA	NA
ABCA4	CHI&DIP	Spe01|Spe14	GMYN	0.602872	3.70984	0.162506	5.67e-28	624	140.675	483.325	NA	323	126.805	196.195	NA	NA	1.30331	0.815455:1.58473:1:1:1:1	0.456731(0.538462:0.377404:0.454327)	NA	NA	NA	NA
ABCA4	SYM&DIP	Spe07|Spe46	GMYN	0.692937	3.48391	0.198896	5.22e-20	567	104.086	462.914	NA	300	94.2087	205.791	NA	NA	1.20528	1.25033:1.47265:1:1:1:1	0.532628(0.494709:0.383598:0.719577)	NA	NA	NA	NA
ABCA4	DIP&CHI	Spe11|Spe31	GMYN	0.396473	4.83157	0.0820588	1.61e-131	2535	627.724	1907.28	NA	1111	531.334	579.666	NA	NA	1.4947	1.59662:2.20423:1:1:1:1	0.446154(0.486391:0.380473:0.471598)	NA	NA	NA	NA
ABCA4	CHI&DIP	Spe37|Spe45	GMYN	0.524856	4.16758	0.125938	8.58e-35	1077	258.985	818.015	NA	512	207.643	304.357	NA	NA	1.40082	1.61282:1.50242:1:1:1:1	0.443825(0.508357:0.376045:0.447075)	NA	NA	NA	NA
ABCA4	DIP&DIP	Spe17|Spe48	GMYN	0.34504	5.36197	0.0643494	3.7e-250	5406	1273.21	4132.79	NA	2145	1017.42	1127.58	NA	NA	1.52662	1.49192:2.4107:1:1:1:1	0.419441(0.45061:0.365705:0.442009)	NA	NA	NA	NA
ABCA4	DIP&CHI	Spe16|Spe36	GMYN	0.792239	4.78272	0.165646	1.74e-60	2676	588.135	2087.87	NA	1495	495.572	999.428	NA	NA	1.66927	1.21257:1.74912:1:1:1:1	0.407138(0.453475:0.359865:0.408072)	NA	NA	NA	NA
ABCA4	SYM&DIP	Spe08|Spe42	GMYN	0.947052	4.44288	0.213162	1.98e-16	1524	373.843	1150.16	NA	890	284.842	605.158	NA	NA	1.80459	0.927683:1.8148:1:1:1:1	0.492126(0.515748:0.397638:0.562992)	NA	NA	NA	NA
ABCA4	PAU&CHI	Spe10|Spe38	GMYN	0.647941	4.69177	0.138102	2.48e-54	2151	520.969	1630.03	NA	1116	419.887	696.113	NA	NA	1.62735	1.25045:1.60049:1:1:1:1	0.459786(0.494421:0.377266:0.507671)	NA	NA	NA	NA
ABCA4	DIP&DIP	Spe42|Spe47	GMYN	0.994053	2.96054	0.335767	3.87e-09	303	51.7999	251.2	NA	184	48.3484	135.652	NA	NA	1.33024	1.07399:1.78243:1:1:1:1	0.521452(0.445545:0.391089:0.727723)	NA	NA	NA	NA
ABCA4	CHI&CHI	Spe01|Spe32	GMYN	0.395316	4.79025	0.082525	5.97e-107	2505	594.072	1910.93	NA	1059	479.193	579.807	NA	NA	1.43759	1.42141:1.90869:1:1:1:1	0.420359(0.481437:0.350898:0.428743)	NA	NA	NA	NA
ABCA4	CHI&CHI	Spe36|Spe38	GMYN	0.610513	4.6483	0.131341	2.43e-83	2142	491.632	1650.37	NA	1112	433.688	678.312	NA	NA	1.53727	1.19859:1.79303:1:1:1:1	0.441877(0.476891:0.371849:0.476891)	NA	NA	NA	NA
ABCA4	CHI&PAU	Spe03|Spe51	GMYN	0.593572	5.14557	0.115356	7.04e-122	4077	954.088	3122.91	NA	2045	785.937	1259.06	NA	NA	1.65882	1.17904:1.78905:1:1:1:1	0.422615(0.461737:0.367182:0.438926)	NA	NA	NA	NA
ABCA4	DIP&DIP	Spe49|Spe50	GMYN	1.11526	3.52335	0.316533	1.06e-11	1863	452.397	1410.6	NA	1138	336.205	801.795	NA	NA	1.70002	1.2498:1.53778:1:1:1:1	0.458132(0.517713:0.369565:0.487118)	NA	NA	NA	NA
ABCA4	CHI&CHI	Spe33|Spe34	GMYN	0.565203	5.15704	0.109598	8.2e-109	4194	968.791	3225.21	NA	2024	763.187	1260.81	NA	NA	1.62589	1.23422:1.58797:1:1:1:1	0.466619(0.469599:0.359442:0.570815)	NA	NA	NA	NA
ABCA4	DIP&CHI	Spe14|Spe36	GMYN	0.68165	3.54797	0.192124	1.44e-13	528	113.367	414.633	NA	275	92.8387	182.161	NA	NA	1.29708	1.00383:1.22208:1:1:1:1	0.417614(0.485795:0.389205:0.377841)	NA	NA	NA	NA
ABCA4	CHI&DIP	Spe05|Spe15	GMYN	0.721196	4.8951	0.14733	4.76e-83	3177	683.211	2493.79	NA	1708	580.15	1127.85	NA	NA	1.61879	0.852552:1.80369:1:1:1:1	0.409978(0.468366:0.363551:0.398017)	NA	NA	NA	NA
ABCA4	DIP&DIP	Spe12|Spe16	GMYN	0.920264	4.40781	0.20878	1.99e-38	1809	356.767	1452.23	NA	1059	310.697	748.303	NA	NA	1.60807	0.85472:1.59823:1:1:1:1	0.391653(0.44942:0.368988:0.356551)	NA	NA	NA	NA
ABCA4	CHI&DIP	Spe05|Spe11	GMYN	0.742018	5.50712	0.134738	1.49e-155	6978	1545.07	5432.93	NA	3781	1278.43	2502.57	NA	NA	1.79711	0.959761:1.64471:1:1:1:1	0.419819(0.483233:0.352966:0.423259)	NA	NA	NA	NA
ABCA4	CHI&DIP	Spe41|Spe42	GMYN	0.818787	3.81522	0.214611	7.5e-21	738	161.898	576.102	NA	421	141.86	279.14	NA	NA	1.47613	0.907121:2.51976:1:1:1:1	0.508808(0.506098:0.390244:0.630081)	NA	NA	NA	NA
ABCA4	CHI&CHI	Spe37|Spe41	GMYN	0.392665	4.17467	0.094059	2.27e-48	1104	261.445	842.555	NA	465	210.99	254.01	NA	NA	1.28831	1.31951:1.85014:1:1:1:1	0.476449(0.514946:0.389946:0.524457)	NA	NA	NA	NA
ABCA4	CHI&CHI	Spe32|Spe35	GMYN	0.618848	4.71063	0.131373	5.3e-86	2460	534.237	1925.76	NA	1262	465.288	796.712	NA	NA	1.50746	1.13117:1.58404:1:1:1:1	0.397154(0.460366:0.356707:0.37439)	NA	NA	NA	NA
ABCA4	DIP&DIP	Spe15|Spe49	GMYN	1.10465	4.55028	0.242766	7.1e-16	1854	431.4	1422.6	NA	1136	334.046	801.954	NA	NA	1.9064	1.20565:1.71625:1:1:1:1	0.426106(0.499191:0.398867:0.380259)	NA	NA	NA	NA
ABCA4	CHI&CHI	Spe34|Spe39	GMYN	1.03213	4.74793	0.217385	2.73e-21	2346	561.48	1784.52	NA	1412	431.195	980.805	NA	NA	1.92145	1.42863:1.88429:1:1:1:1	0.478048(0.482737:0.378517:0.57289)	NA	NA	NA	NA
ABCA4	SYM&CHI	Spe08|Spe34	GMYN	0.63477	4.90175	0.129499	4.03e-80	2973	689.289	2283.71	NA	1527	565.061	961.939	NA	NA	1.62407	1.08296:1.58283:1:1:1:1	0.473428(0.483855:0.36781:0.568618)	NA	NA	NA	NA
ABCA4	DIP&CHI	Spe17|Spe33	GMYN	0.774825	5.25666	0.147399	5.21e-63	4797	1106.42	3690.58	NA	2581	833.627	1747.37	NA	NA	1.80855	1.17291:1.81638:1:1:1:1	0.454659(0.465916:0.358974:0.539087)	NA	NA	NA	NA
ABCA4	SYM&PAU	Spe08|Spe51	GMYN	0.612966	4.93813	0.124129	4.38e-92	3078	723.554	2354.45	NA	1570	600.025	969.975	NA	NA	1.62969	1.11389:1.36583:1:1:1:1	0.465075(0.479045:0.368421:0.547758)	NA	NA	NA	NA
ABCA4	CHI&CHI	Spe32|Spe37	GMYN	0.286193	4.0428	0.0707908	1.2e-86	1059	219.292	839.708	NA	403	205.645	197.355	NA	NA	1.06409	0.986809:1.73093:1:1:1:1	0.416903(0.51983:0.372521:0.358357)	NA	NA	NA	NA
ABCA4	DIP&DIP	Spe13|Spe50	GMYN	0.709495	4.87502	0.145537	6.05e-49	2742	665.159	2076.84	NA	1449	512.556	936.444	NA	NA	1.71998	1.28839:2.02666:1:1:1:1	0.474106(0.497265:0.391685:0.53337)	NA	NA	NA	NA
ABCA4	CHI&DIP	Spe32|Spe48	GMYN	0.84448	3.22493	0.26186	9.1e-26	2496	572.269	1923.73	NA	1378	423.377	954.623	NA	NA	1.39026	1.64587:1.94969:1:1:1:1	0.390825(0.451923:0.346154:0.374399)	NA	NA	NA	NA
ABCA4	DIP&SYM	Spe48|Spe52	GMYN	0.677297	5.30339	0.12771	7.52e-169	5097	1177.54	3919.46	NA	2742	1027.93	1714.07	NA	NA	1.74604	1.07031:1.86606:1:1:1:1	0.456347(0.477634:0.377869:0.513537)	NA	NA	NA	NA
ABCA4	CHI&CHI	Spe03|Spe31	GMYN	0.793414	4.74967	0.167046	3.82e-45	2331	562.786	1768.21	NA	1305	454.955	850.045	NA	NA	1.74859	1.29819:1.63809:1:1:1:1	0.426426(0.465894:0.380952:0.432432)	NA	NA	NA	NA
ABCA4	CHI&DIP	Spe35|Spe44	GMYN	0.660842	4.90489	0.134731	6.88e-104	3207	692.184	2514.82	NA	1686	603.288	1082.71	NA	NA	1.57686	0.998143:1.53872:1:1:1:1	0.421578(0.478485:0.380262:0.405987)	NA	NA	NA	NA
ABCA4	DIP&CHI	Spe16|Spe35	GMYN	0.690868	4.84301	0.142653	2.94e-106	3144	637.364	2506.64	NA	1678	571.356	1106.64	NA	NA	1.53261	1.04914:1.58254:1:1:1:1	0.388518(0.449427:0.359256:0.35687)	NA	NA	NA	NA
ABCA4	CHI&DIP	Spe01|Spe46	GMYN	0.74734	4.72401	0.1582	3.98e-48	2373	543.853	1829.15	NA	1291	439.549	851.451	NA	NA	1.65873	1.50009:1.88572:1:1:1:1	0.504003(0.498736:0.369785:0.643489)	NA	NA	NA	NA
ABCA4	DIP&SYM	Spe16|Spe52	GMYN	0.673317	5.30029	0.127034	2.28e-194	5088	1172.69	3915.31	NA	2759	1053.88	1705.12	NA	NA	1.73975	1.0551:1.94975:1:1:1:1	0.448605(0.479068:0.376474:0.490271)	NA	NA	NA	NA
ABCA4	DIP&DIP	Spe15|Spe48	GMYN	1.01372	4.84618	0.209179	4.66e-43	3015	640.065	2374.93	NA	1819	530.88	1288.12	NA	NA	1.82733	1.21747:1.45756:1:1:1:1	0.387728(0.442289:0.373632:0.347264)	NA	NA	NA	NA
ABCA4	CHI&CHI	Spe04|Spe37	GMYN	0.516094	4.13088	0.124936	5.4e-55	1089	246.618	842.382	NA	531	222.129	308.871	NA	NA	1.33471	0.938526:1.61014:1:1:1:1	0.450872(0.509642:0.392562:0.450413)	NA	NA	NA	NA
ABCA4	CHI&CHI	Spe31|Spe32	GMYN	0.790784	4.71806	0.167608	3.74e-36	2247	539.555	1707.45	NA	1239	420.638	818.362	NA	NA	1.73381	1.41973:2.02572:1:1:1:1	0.427236(0.46729:0.368491:0.445928)	NA	NA	NA	NA
ABCA4	DIP&DIP	Spe43|Spe45	GMYN	0.346002	5.19611	0.0665887	4.3e-305	4506	1020.6	3485.4	NA	1879	924.607	954.393	NA	NA	1.44455	0.996778:1.80807:1:1:1:1	0.48391(0.504328:0.393475:0.553928)	NA	NA	NA	NA
ABCA4	DIP&DIP	Spe14|Spe48	GMYN	0.630379	3.87938	0.162495	2.05e-33	834	176.357	657.643	NA	434	158.809	275.191	NA	NA	1.31741	1.29092:1.76415:1:1:1:1	0.403477(0.476619:0.379496:0.354317)	NA	NA	NA	NA
ABCA4	DIP&CHI	Spe11|Spe41	GMYN	0.666801	4.90765	0.13587	9.49e-51	2868	694.733	2173.27	NA	1469	524.612	944.388	NA	NA	1.69409	1.51009:1.48971:1:1:1:1	0.452755(0.480649:0.369247:0.508368)	NA	NA	NA	NA
ABCA4	CHI&CHI	Spe05|Spe34	GMYN	0.602189	5.20386	0.11572	3.01e-98	4263	1031.21	3231.79	NA	2115	799.582	1315.42	NA	NA	1.71532	1.30518:2.03042:1:1:1:1	0.447103(0.46974:0.362069:0.5095)	NA	NA	NA	NA
ABCA4	CHI&DIP	Spe31|Spe47	GMYN	0.28674	3.01593	0.0950752	0	303	55.7704	247.23	NA	114	55.5973	58.4027	NA	NA	0.789077	1.45136:1.99328:1:1:1:1	0.529703(0.480198:0.361386:0.747525)	NA	NA	NA	NA
ABCA4	DIP&DIP	Spe15|Spe50	GMYN	1.00048	4.66357	0.21453	1.03e-38	2160	501.748	1658.25	NA	1322	425.603	896.397	NA	NA	1.85138	1.18715:1.61607:1:1:1:1	0.445833(0.490278:0.36875:0.478472)	NA	NA	NA	NA
ABCA4	DIP&CHI	Spe16|Spe37	GMYN	0.586532	4.07038	0.144098	6.06e-35	1089	227.505	861.495	NA	535	191.713	343.287	NA	NA	1.31435	1.09897:1.79996:1:1:1:1	0.410468(0.490358:0.374656:0.366391)	NA	NA	NA	NA
ABCA4	CHI&DIP	Spe41|Spe45	GMYN	0.687376	4.90727	0.140073	6.75e-50	2874	694.383	2179.62	NA	1493	527.078	965.922	NA	NA	1.70694	1.4637:1.62602:1:1:1:1	0.471294(0.489562:0.373173:0.551148)	NA	NA	NA	NA
ABCA4	DIP&CHI	Spe16|Spe34	GMYN	0.790507	5.17337	0.152803	4.36e-67	4203	990.126	3212.87	NA	2315	775.975	1539.02	NA	NA	1.82301	1.28951:1.83859:1:1:1:1	0.421128(0.461813:0.362241:0.439329)	NA	NA	NA	NA
ABCA4	SYM&SYM	Spe08|Spe52	GMYN	0.143555	5.01031	0.028652	0	3576	796.645	2779.36	NA	1044	683.108	360.892	NA	NA	1.22775	1.02958:1.29566:1:1:1:1	0.507411(0.505453:0.398909:0.617869)	NA	NA	NA	NA
ABCA4	CHI&DIP	Spe35|Spe48	GMYN	0.715416	4.89154	0.146256	7.71e-76	3171	679.97	2491.03	NA	1690	566.345	1123.66	NA	NA	1.61092	1.19408:1.70369:1:1:1:1	0.397193(0.447966:0.3614:0.382214)	NA	NA	NA	NA
ABCA4	DIP&CHI	Spe16|Spe38	GMYN	0.767393	4.60962	0.166476	4.09e-44	2094	466.92	1627.08	NA	1150	383.687	766.313	NA	NA	1.62413	1.28432:1.86176:1:1:1:1	0.401862(0.476361:0.346705:0.382521)	NA	NA	NA	NA
ABCA4	CHI&PAU	Spe03|Spe10	GMYN	0.65628	5.17632	0.126785	1.6e-114	4056	994.021	3061.98	NA	2142	824.603	1317.4	NA	NA	1.76403	1.27613:1.62884:1:1:1:1	0.439842(0.476701:0.376849:0.465976)	NA	NA	NA	NA
ABCA4	CHI&DIP	Spe02|Spe45	GMYN	0.821835	4.80206	0.171142	5.64e-40	2463	603.5	1859.5	NA	1386	475.603	910.397	NA	NA	1.79709	1.22279:2.01271:1:1:1:1	0.448437(0.487211:0.361754:0.496346)	NA	NA	NA	NA
ABCA4	SYM&DIP	Spe08|Spe11	GMYN	0.672665	5.01882	0.134028	2.4e-77	3417	805.737	2611.26	NA	1784	644.836	1139.16	NA	NA	1.6975	1.06535:1.66857:1:1:1:1	0.461809(0.5:0.398595:0.486831)	NA	NA	NA	NA
ABCA4	DIP&CHI	Spe14|Spe41	GMYN	0.590655	3.74275	0.157813	1.18e-44	660	146.985	513.015	NA	351	144.962	206.038	NA	NA	1.29264	1.12855:1.70715:1:1:1:1	0.432576(0.479545:0.381818:0.436364)	NA	NA	NA	NA
ABCA4	DIP&PAU	Spe48|Spe51	GMYN	0.862366	5.29809	0.162769	1.06e-58	4821	1169.25	3651.75	NA	2729	894.051	1834.95	NA	NA	1.93818	1.64143:1.81128:1:1:1:1	0.417859(0.450218:0.359054:0.444306)	NA	NA	NA	NA
ABCA4	SYM&CHI	Spe09|Spe37	GMYN	0.465079	4.15858	0.111836	2.59e-49	1098	255.896	842.104	NA	505	217.528	287.472	NA	NA	1.32587	1.16784:1.61534:1:1:1:1	0.452186(0.512295:0.396175:0.448087)	NA	NA	NA	NA
ABCA4	CHI&DIP	Spe31|Spe43	GMYN	0.428941	4.78122	0.0897137	3.24e-115	2511	586.962	1924.04	NA	1115	495.007	619.993	NA	NA	1.44631	1.30035:2.14167:1:1:1:1	0.467543(0.490442:0.387694:0.524492)	NA	NA	NA	NA
ABCA4	DIP&CHI	Spe17|Spe38	GMYN	0.714356	4.68536	0.152465	3.83e-35	2148	516.537	1631.46	NA	1131	391.958	739.042	NA	NA	1.66928	1.37214:1.67195:1:1:1:1	0.447626(0.490922:0.359637:0.492318)	NA	NA	NA	NA
ABCA4	DIP&DIP	Spe43|Spe49	GMYN	0.989591	4.69009	0.210996	1.9e-31	2142	519.801	1622.2	NA	1296	423.791	872.209	NA	NA	1.88759	1.19758:1.74538:1:1:1:1	0.485528(0.521008:0.385854:0.54972)	NA	NA	NA	NA
ABCA4	CHI&DIP	Spe41|Spe47	GMYN	0.876386	3.10888	0.281898	0.000325872	303	63.1282	239.872	NA	168	47.4732	120.527	NA	NA	1.34151	2.5648:1.08843:1:1:1:1	0.49835(0.430693:0.331683:0.732673)	NA	NA	NA	NA
ABCA4	DIP&CHI	Spe12|Spe34	GMYN	0.876694	4.19831	0.208821	1.44e-20	1164	269.816	894.184	NA	671	219.176	451.824	NA	NA	1.64665	1.15532:1.34401:1:1:1:1	0.460481(0.529639:0.378866:0.472938)	NA	NA	NA	NA
ABCA4	SYM&DIP	Spe09|Spe50	GMYN	0.49794	5.24648	0.0949094	7.57e-186	4740	1091.5	3648.5	NA	2228	920.284	1307.72	NA	NA	1.5914	1.03978:1.8473:1:1:1:1	0.470042(0.482595:0.383861:0.543671)	NA	NA	NA	NA
ABCA4	CHI&CHI	Spe01|Spe33	GMYN	0.377876	5.2734	0.071657	4.4e-242	4833	1131.38	3701.62	NA	2034	949.377	1084.62	NA	NA	1.5239	1.2027:1.90433:1:1:1:1	0.446927(0.462135:0.351955:0.526691)	NA	NA	NA	NA
ABCA4	SYM&DIP	Spe08|Spe16	GMYN	0.719905	4.96481	0.145002	2.18e-119	3384	749.752	2634.25	NA	1866	674.832	1191.17	NA	NA	1.6604	0.865229:1.78621:1:1:1:1	0.427305(0.469858:0.378103:0.433954)	NA	NA	NA	NA
ABCA4	DIP&CHI	Spe12|Spe37	GMYN	0.983726	3.2151	0.30597	0.000202298	1092	264.7	827.3	NA	621	176.143	444.857	NA	NA	1.52461	1.74582:1.57678:1:1:1:1	0.438187(0.524725:0.384615:0.40522)	NA	NA	NA	NA
ABCA4	SYM&DIP	Spe07|Spe44	GMYN	0.803862	3.72858	0.215595	5.32e-12	627	144.235	482.765	NA	349	115.303	233.697	NA	NA	1.47667	1.13412:1.42653:1:1:1:1	0.472887(0.488038:0.41866:0.511962)	NA	NA	NA	NA
ABCA4	DIP&SYM	Spe15|Spe52	GMYN	1.16826	4.95652	0.235702	1.26e-22	2943	741.511	2201.49	NA	1854	575.617	1278.38	NA	NA	2.12274	1.48045:1.73885:1:1:1:1	0.46704(0.492864:0.399083:0.509174)	NA	NA	NA	NA
ABCA4	CHI&PAU	Spe04|Spe51	GMYN	0.682226	5.02727	0.135705	2.18e-82	3342	814.87	2527.13	NA	1776	663.182	1112.82	NA	NA	1.74167	1.38493:1.90239:1:1:1:1	0.470826(0.493716:0.375224:0.543537)	NA	NA	NA	NA
ABCA4	CHI&CHI	Spe38|Spe41	GMYN	0.563406	4.68984	0.120133	2.17e-72	2232	519.63	1712.37	NA	1098	429.942	668.058	NA	NA	1.52408	1.20518:1.86817:1:1:1:1	0.460349(0.488575:0.36828:0.524194)	NA	NA	NA	NA
ABCA4	SYM&CHI	Spe08|Spe31	GMYN	0.84637	4.63485	0.18261	3.95e-28	2055	482.894	1572.11	NA	1156	373.797	782.203	NA	NA	1.73661	1.13996:1.62157:1:1:1:1	0.477372(0.486861:0.387591:0.557664)	NA	NA	NA	NA
ABCA4	SYM&DIP	Spe07|Spe45	GMYN	0.757447	3.68848	0.205355	2.71e-27	627	136.726	490.274	NA	358	128.946	229.054	NA	NA	1.3966	0.855965:1.43436:1:1:1:1	0.476077(0.478469:0.416268:0.533493)	NA	NA	NA	NA
ABCA4	DIP&CHI	Spe15|Spe38	GMYN	0.898471	4.53581	0.198084	3.85e-57	2037	423.157	1613.84	NA	1207	383.909	823.091	NA	NA	1.65408	0.62354:1.38609:1:1:1:1	0.415317(0.482327:0.372607:0.391016)	NA	NA	NA	NA
ABCA4	DIP&DIP	Spe14|Spe17	GMYN	0.502119	3.95653	0.126909	1.88e-31	831	195.462	635.538	NA	391	161.533	229.467	NA	NA	1.31464	1.43319:1.49716:1:1:1:1	0.45367(0.50361:0.398917:0.458484)	NA	NA	NA	NA
ABCA4	DIP&DIP	Spe13|Spe45	GMYN	0.621772	4.89785	0.126948	8.75e-91	2808	685.716	2122.28	NA	1460	577.397	882.603	NA	NA	1.66599	1.2407:1.78737:1:1:1:1	0.458511(0.502137:0.395299:0.478098)	NA	NA	NA	NA
ABCA4	CHI&CHI	Spe03|Spe38	GMYN	0.410557	4.67647	0.087792	8.61e-97	2163	510.451	1652.55	NA	938	421.379	516.621	NA	NA	1.41728	1.50678:1.34729:1:1:1:1	0.407767(0.472954:0.366852:0.383495)	NA	NA	NA	NA
ABCA4	DIP&CHI	Spe15|Spe41	GMYN	0.991448	4.64089	0.213633	6.21e-30	2100	486.8	1613.2	NA	1265	396.635	868.365	NA	NA	1.83742	1.16935:1.47252:1:1:1:1	0.441667(0.470714:0.371429:0.482857)	NA	NA	NA	NA
ABCA4	DIP&PAU	Spe42|Spe51	GMYN	1.02238	4.52636	0.225872	1e-18	1653	417.859	1235.14	NA	1005	328.126	676.874	NA	NA	1.90814	1.37828:1.80871:1:1:1:1	0.477919(0.498185:0.380218:0.555354)	NA	NA	NA	NA
ABCA4	CHI&DIP	Spe04|Spe17	GMYN	0.397558	5.10948	0.077808	5.27e-175	3798	909.265	2888.73	NA	1630	750.115	879.885	NA	NA	1.52562	1.4046:1.96382:1:1:1:1	0.474987(0.495656:0.39139:0.537915)	NA	NA	NA	NA
ABCA4	DIP&DIP	Spe44|Spe49	GMYN	1.06163	3.91384	0.271251	6.73e-15	2142	514.903	1627.1	NA	1290	384.086	905.914	NA	NA	1.74726	1.5209:1.65975:1:1:1:1	0.43254(0.506303:0.381653:0.409664)	NA	NA	NA	NA
ABCA4	CHI&DIP	Spe05|Spe44	GMYN	0.736656	5.4881	0.134228	1.93e-174	6912	1506.37	5405.63	NA	3757	1278.2	2478.8	NA	NA	1.77217	0.827315:1.41558:1:1:1:1	0.422815(0.482639:0.351562:0.434245)	NA	NA	NA	NA
ABCA4	CHI&DIP	Spe38|Spe46	GMYN	0.72433	4.65763	0.155515	8.36e-44	2142	497.786	1644.21	NA	1150	398.271	751.729	NA	NA	1.6384	1.57478:1.73951:1:1:1:1	0.499066(0.5007:0.370448:0.62605)	NA	NA	NA	NA
ABCA4	CHI&CHI	Spe03|Spe33	GMYN	0.432644	5.16383	0.0837836	2.99e-171	4068	977.605	3090.4	NA	1806	803.737	1002.26	NA	NA	1.56962	1.41769:1.91832:1:1:1:1	0.421829(0.450221:0.35767:0.457596)	NA	NA	NA	NA
ABCA4	DIP&DIP	Spe11|Spe48	GMYN	0.42114	5.30895	0.0793263	4.28e-243	5346	1186.31	4159.69	NA	2327	1005.31	1321.69	NA	NA	1.50578	1.41311:1.95017:1:1:1:1	0.402263(0.460438:0.367284:0.379068)	NA	NA	NA	NA
ABCA4	CHI&DIP	Spe04|Spe11	GMYN	0.40594	5.10869	0.0794607	7.94e-197	3798	908.309	2889.69	NA	1673	779.607	893.393	NA	NA	1.53062	1.21583:2.13355:1:1:1:1	0.457741(0.49921:0.39297:0.481043)	NA	NA	NA	NA
ABCA4	CHI&DIP	Spe35|Spe45	GMYN	0.66755	4.94142	0.135093	3.22e-79	3183	726.735	2456.26	NA	1660	594.489	1065.51	NA	NA	1.64335	1.11674:1.71883:1:1:1:1	0.433082(0.476909:0.373704:0.448633)	NA	NA	NA	NA
ABCA4	DIP&CHI	Spe17|Spe37	GMYN	0.520741	4.17392	0.124761	2.52e-37	1092	261.185	830.815	NA	519	211.895	307.105	NA	NA	1.39451	1.42361:1.62774:1:1:1:1	0.455128(0.505495:0.398352:0.461538)	NA	NA	NA	NA
ABCA4	SYM&DIP	Spe09|Spe12	GMYN	0.978568	3.33653	0.293289	1.45e-13	1644	392.045	1251.95	NA	960	290.595	669.405	NA	NA	1.54087	1.41953:1.85167:1:1:1:1	0.430961(0.502737:0.385949:0.404197)	NA	NA	NA	NA
ABCA4	SYM&DIP	Spe09|Spe16	GMYN	0.757031	5.21867	0.145062	2.74e-108	4587	1051.77	3535.23	NA	2531	880.282	1650.72	NA	NA	1.78006	1.34668:1.93935:1:1:1:1	0.409091(0.449313:0.367888:0.410072)	NA	NA	NA	NA
ABCA4	DIP&CHI	Spe17|Spe41	GMYN	0.692244	4.88774	0.141628	4.33e-61	2898	676.539	2221.46	NA	1526	538.125	987.875	NA	NA	1.67168	1.45244:1.76565:1:1:1:1	0.466011(0.469462:0.365424:0.563147)	NA	NA	NA	NA
ABCA4	CHI&SYM	Spe03|Spe07	GMYN	0.710857	3.69421	0.192425	9.41e-24	615	137.774	477.226	NA	339	124.554	214.446	NA	NA	1.3792	1.25252:2.30542:1:1:1:1	0.443902(0.45122:0.4:0.480488)	NA	NA	NA	NA
ABCA4	DIP&SYM	Spe47|Spe52	GMYN	0.607244	3.0017	0.2023	4.35e-16	303	54.7222	248.278	NA	154	52.6336	101.366	NA	NA	1.03969	1.82295:1.7629:1:1:1:1	0.536304(0.490099:0.356436:0.762376)	NA	NA	NA	NA
ABCA4	SYM&SYM	Spe08|Spe09	GMYN	0.687183	4.97813	0.13804	1.88e-58	3126	763.193	2362.81	NA	1633	587.375	1045.62	NA	NA	1.73479	1.36948:1.7967:1:1:1:1	0.457294(0.470729:0.37524:0.525912)	NA	NA	NA	NA
ABCA4	CHI&CHI	Spe32|Spe34	GMYN	0.649193	4.79863	0.135287	2.19e-49	2520	600.743	1919.26	NA	1279	459.872	819.128	NA	NA	1.63838	1.22897:1.81011:1:1:1:1	0.434127(0.485714:0.357143:0.459524)	NA	NA	NA	NA
ABCA4	SYM&DIP	Spe09|Spe48	GMYN	0.777043	5.24887	0.14804	2.02e-85	4587	1094.98	3492.02	NA	2532	876.787	1655.21	NA	NA	1.84452	1.51394:2.07917:1:1:1:1	0.413015(0.445716:0.364617:0.428712)	NA	NA	NA	NA
ABCA4	CHI&CHI	Spe03|Spe04	GMYN	0.686804	4.99377	0.137532	6.65e-86	3237	779.268	2457.73	NA	1733	646.537	1086.46	NA	NA	1.72365	1.27491:1.67262:1:1:1:1	0.431881(0.484245:0.376738:0.434662)	NA	NA	NA	NA
ABCA4	CHI&DIP	Spe36|Spe46	GMYN	0.733759	4.63923	0.158164	1e-67	2265	485.725	1779.28	NA	1246	426.879	819.121	NA	NA	1.57128	1.37093:2.08422:1:1:1:1	0.505077(0.483444:0.374172:0.657616)	NA	NA	NA	NA
ABCA4	CHI&DIP	Spe34|Spe44	GMYN	0.689813	5.20564	0.132513	1.67e-92	4224	1033.65	3190.35	NA	2241	824.84	1416.16	NA	NA	1.79488	1.35301:1.49554:1:1:1:1	0.453598(0.496094:0.37429:0.490412)	NA	NA	NA	NA
ABCA4	DIP&DIP	Spe13|Spe44	GMYN	0.575425	4.87982	0.117919	6.52e-93	2802	669.431	2132.57	NA	1401	557.876	843.124	NA	NA	1.6038	1.23748:1.94541:1:1:1:1	0.444861(0.503747:0.395075:0.43576)	NA	NA	NA	NA
ABCA4	SYM&CHI	Spe09|Spe41	GMYN	0.472369	4.89168	0.0965658	1.14e-145	2997	680.098	2316.9	NA	1400	599.979	800.021	NA	NA	1.47523	1.05882:1.8302:1:1:1:1	0.462963(0.46997:0.374374:0.544545)	NA	NA	NA	NA
ABCA4	CHI&CHI	Spe33|Spe37	GMYN	0.315354	4.12938	0.0763683	5.09e-91	1101	246.124	854.876	NA	449	231.457	217.543	NA	NA	1.16796	1.11429:1.538:1:1:1:1	0.440054(0.527248:0.361035:0.43188)	NA	NA	NA	NA
ABCA4	DIP&CHI	Spe17|Spe40	GMYN	1.09869	4.57391	0.240209	1.6e-32	2031	445.21	1585.79	NA	1256	377.573	878.427	NA	NA	1.86049	0.892895:1.98323:1:1:1:1	0.427622(0.5:0.367061:0.415805)	NA	NA	NA	NA
ABCA4	CHI&DIP	Spe02|Spe17	GMYN	0.818236	4.78764	0.170906	7.22e-37	2493	592.006	1900.99	NA	1387	459.786	927.214	NA	NA	1.76084	1.25996:1.94622:1:1:1:1	0.440233(0.465704:0.347172:0.507822)	NA	NA	NA	NA
ABCA4	DIP&CHI	Spe15|Spe33	GMYN	1.1157	4.95664	0.225091	2.09e-20	3027	741.629	2285.37	NA	1859	559.899	1299.1	NA	NA	2.05674	1.50357:1.40065:1:1:1:1	0.42633(0.452428:0.358771:0.46779)	NA	NA	NA	NA
ABCA4	CHI&DIP	Spe36|Spe47	GMYN	0.928795	3.14151	0.295653	0.000220985	303	65.9354	237.065	NA	174	50.9068	123.093	NA	NA	1.4103	2.09299:2.43599:1:1:1:1	0.485149(0.445545:0.336634:0.673267)	NA	NA	NA	NA
ABCA4	DIP&DIP	Spe11|Spe16	GMYN	0.431678	5.34702	0.0807324	1.32e-279	5871	1248.08	4622.92	NA	2583	1087.85	1495.15	NA	NA	1.4766	1.28047:1.97648:1:1:1:1	0.395674(0.463975:0.367399:0.355646)	NA	NA	NA	NA
ABCA4	CHI&DIP	Spe39|Spe45	GMYN	0.930306	4.73788	0.196355	5.3e-24	2265	554.008	1710.99	NA	1317	421.987	895.013	NA	NA	1.86162	1.33454:1.6183:1:1:1:1	0.480353(0.501987:0.397351:0.541722)	NA	NA	NA	NA
ABCA4	CHI&DIP	Spe34|Spe49	GMYN	1.06597	4.72306	0.225695	7.44e-19	2217	543.162	1673.84	NA	1347	415.905	931.095	NA	NA	1.96195	1.18542:1.37327:1:1:1:1	0.463239(0.52571:0.38092:0.483085)	NA	NA	NA	NA
ABCA4	SYM&DIP	Spe09|Spe46	GMYN	0.733733	4.70937	0.155803	8.38e-70	2403	533.337	1869.66	NA	1325	463.603	861.397	NA	NA	1.61611	1.40988:1.54912:1:1:1:1	0.508115(0.489388:0.381398:0.653558)	NA	NA	NA	NA
ABCA4	DIP&DIP	Spe11|Spe17	GMYN	0.420465	5.55227	0.0757284	0	7053	1640.95	5412.05	NA	3121	1403.81	1717.19	NA	NA	1.61443	1.19267:1.97633:1:1:1:1	0.439246(0.486601:0.374096:0.45704)	NA	NA	NA	NA
ABCA4	CHI&SYM	Spe05|Spe07	GMYN	0.489929	3.75098	0.130614	3.72e-29	603	148.607	454.393	NA	290	128.825	161.175	NA	NA	1.2936	1.71228:1.91556:1:1:1:1	0.464345(0.467662:0.395522:0.529851)	NA	NA	NA	NA
ABCA4	DIP&DIP	Spe13|Spe42	GMYN	0.957243	4.01681	0.238309	6.69e-09	813	211.823	601.177	NA	474	158.873	315.127	NA	NA	1.7544	1.0601:2.47342:1:1:1:1	0.494465(0.520295:0.428044:0.535055)	NA	NA	NA	NA
ABCA4	DIP&DIP	Spe11|Spe12	GMYN	0.8782	4.46764	0.196569	4.11e-35	1749	386.393	1362.61	NA	1015	325.023	689.977	NA	NA	1.67119	1.0862:1.56914:1:1:1:1	0.421384(0.492281:0.383362:0.388508)	NA	NA	NA	NA
ABCA4	SYM&DIP	Spe09|Spe13	GMYN	0.670855	4.85792	0.138095	2.64e-76	2643	650.165	1992.84	NA	1412	543.624	868.376	NA	NA	1.70085	1.3567:1.97357:1:1:1:1	0.446273(0.477299:0.389898:0.471623)	NA	NA	NA	NA
ABCA4	DIP&CHI	Spe14|Spe37	GMYN	0.75874	3.48328	0.217823	1.3e-14	483	103.999	379.001	NA	267	90.0788	176.921	NA	NA	1.34539	0.633153:1.14376:1:1:1:1	0.450311(0.540373:0.360248:0.450311)	NA	NA	NA	NA
ABCA4	SYM&DIP	Spe09|Spe11	GMYN	0.70141	5.26938	0.133111	1.67e-96	4584	1125.34	3458.66	NA	2446	894.796	1551.2	NA	NA	1.82281	1.5227:1.69967:1:1:1:1	0.4387(0.48462:0.379254:0.452225)	NA	NA	NA	NA
ABCA4	CHI&DIP	Spe35|Spe46	GMYN	0.65666	4.79194	0.137034	6.68e-138	2691	595.415	2095.58	NA	1468	568.152	899.848	NA	NA	1.57164	0.967153:1.64688:1:1:1:1	0.482349(0.482163:0.389075:0.575808)	NA	NA	NA	NA
ABCA4	DIP&DIP	Spe47|Spe50	GMYN	0.852441	3.00388	0.28378	1.99e-08	303	54.8812	248.119	NA	171	48.6263	122.374	NA	NA	1.24212	2.0318:1.32397:1:1:1:1	0.526403(0.445545:0.371287:0.762376)	NA	NA	NA	NA
ABCA4	CHI&DIP	Spe02|Spe12	GMYN	1.06882	4.5521	0.234798	2.37e-25	1872	432.449	1439.55	NA	1151	354.679	796.321	NA	NA	1.87349	1.15881:2.09122:1:1:1:1	0.418803(0.469551:0.350962:0.435897)	NA	NA	NA	NA
ABCA4	PAU&CHI	Spe10|Spe31	GMYN	0.607275	4.74118	0.128085	1.57e-76	2409	556.448	1852.55	NA	1225	467.344	757.656	NA	NA	1.56216	1.01659:1.51655:1:1:1:1	0.475093(0.486924:0.386052:0.552304)	NA	NA	NA	NA
ABCA4	CHI&DIP	Spe04|Spe13	GMYN	0.652505	4.88363	0.133611	1.26e-81	2823	672.839	2150.16	NA	1482	561.063	920.937	NA	NA	1.66096	1.00695:1.63961:1:1:1:1	0.462097(0.495749:0.397981:0.492561)	NA	NA	NA	NA
ABCA4	SYM&PAU	Spe07|Spe51	GMYN	0.483011	3.72239	0.129758	1.1e-30	615	143.048	471.952	NA	291	125.47	165.53	NA	NA	1.23649	1.21477:0.856743:1:1:1:1	0.493496(0.480488:0.409756:0.590244)	NA	NA	NA	NA
ABCA4	DIP&DIP	Spe42|Spe43	GMYN	0.98108	4.48002	0.21899	2.15e-21	1701	392.825	1308.17	NA	1015	312.738	702.262	NA	NA	1.78912	1.10292:2.17739:1:1:1:1	0.524691(0.52381:0.410935:0.63933)	NA	NA	NA	NA
ABCA4	CHI&DIP	Spe03|Spe16	GMYN	0.770389	5.06045	0.152237	1.22e-65	4053	851.724	3201.28	NA	2183	673.004	1510	NA	NA	1.67193	1.4092:1.83802:1:1:1:1	0.374907(0.440415:0.358993:0.325315)	NA	NA	NA	NA
ABCA4	DIP&CHI	Spe13|Spe38	GMYN	0.668593	4.665	0.143321	3.24e-49	2172	502.7	1669.3	NA	1126	401.003	724.997	NA	NA	1.59354	1.00654:1.71079:1:1:1:1	0.437385(0.493785:0.36395:0.45442)	NA	NA	NA	NA
ABCA4	DIP&DIP	Spe16|Spe46	GMYN	0.315553	4.79122	0.0658606	0	2643	594.844	2048.16	NA	1115	594.824	520.176	NA	NA	1.32287	1.19786:2.69106:1:1:1:1	0.474272(0.480704:0.375709:0.566402)	NA	NA	NA	NA
ABCA4	CHI&DIP	Spe36|Spe44	GMYN	0.728798	4.85571	0.150091	9.78e-46	2685	648.255	2036.74	NA	1434	499.711	934.289	NA	NA	1.72518	1.46527:1.5353:1:1:1:1	0.439851(0.491061:0.375978:0.452514)	NA	NA	NA	NA
ABCA4	CHI&CHI	Spe31|Spe39	GMYN	0.861829	4.25989	0.202313	5e-34	1281	292.906	988.094	NA	752	256.876	495.124	NA	NA	1.63881	1.06876:1.10282:1:1:1:1	0.478142(0.509368:0.391101:0.533958)	NA	NA	NA	NA
ABCA4	DIP&CHI	Spe14|Spe38	GMYN	0.769945	3.46241	0.222373	1.03e-22	495	101.143	393.857	NA	283	97.2103	185.79	NA	NA	1.3201	0.715923:0.870459:1:1:1:1	0.433333(0.533333:0.360606:0.406061)	NA	NA	NA	NA
ABCA4	CHI&DIP	Spe04|Spe42	GMYN	0.96884	4.60644	0.210323	4.18e-17	1767	464.945	1302.05	NA	1040	348.88	691.12	NA	NA	1.92599	1.39051:2.9411:1:1:1:1	0.49236(0.5:0.406621:0.570458)	NA	NA	NA	NA
ABCA4	CHI&CHI	Spe02|Spe35	GMYN	0.868918	4.25396	0.204261	3.14e-24	1302	290.601	1011.4	NA	747	239.446	507.554	NA	NA	1.62445	1.23887:1.62111:1:1:1:1	0.408986(0.463134:0.352535:0.41129)	NA	NA	NA	NA
ABCA4	CHI&CHI	Spe31|Spe33	GMYN	0.733742	4.7586	0.154193	8.1e-49	2355	569.522	1785.48	NA	1278	456.568	821.432	NA	NA	1.70709	1.33675:1.87919:1:1:1:1	0.466454(0.47707:0.374522:0.547771)	NA	NA	NA	NA
ABCA4	SYM&PAU	Spe07|Spe10	GMYN	0.638203	3.75684	0.169878	2.42e-14	627	149.773	477.227	NA	318	115.783	202.217	NA	NA	1.38316	1.82527:1.42326:1:1:1:1	0.508772(0.495215:0.399522:0.631579)	NA	NA	NA	NA
ABCA4	CHI&SYM	Spe35|Spe52	GMYN	0.550685	4.9513	0.11122	3.9e-167	3192	736.374	2455.63	NA	1623	680.991	942.009	NA	NA	1.56588	1.02796:1.82905:1:1:1:1	0.463346(0.490602:0.380169:0.519267)	NA	NA	NA	NA
ABCA4	SYM&DIP	Spe09|Spe42	GMYN	1.12513	2.77296	0.40575	3.33e-09	1641	427.229	1213.77	NA	1006	312.478	693.522	NA	NA	1.55414	1.39835:1.81225:1:1:1:1	0.468921(0.493601:0.384826:0.528336)	NA	NA	NA	NA
ABCA4	CHI&DIP	Spe05|Spe13	GMYN	0.64674	4.8835	0.132434	9.08e-76	2931	672.719	2258.28	NA	1507	548.942	958.058	NA	NA	1.61915	0.869713:1.74079:1:1:1:1	0.440293(0.481576:0.375128:0.464176)	NA	NA	NA	NA
ABCA4	SYM&CHI	Spe07|Spe36	GMYN	0.801906	3.45079	0.232383	2.55e-15	465	99.5896	365.41	NA	264	89.0679	174.932	NA	NA	1.36922	0.87391:1.51009:1:1:1:1	0.466667(0.503226:0.383871:0.512903)	NA	NA	NA	NA
ABCA4	CHI&CHI	Spe05|Spe38	GMYN	0.475011	4.70917	0.100869	1.52e-95	2238	533.195	1704.8	NA	1042	450.248	591.752	NA	NA	1.48378	1.4958:1.85227:1:1:1:1	0.434763(0.475871:0.354558:0.473861)	NA	NA	NA	NA
ABCA4	CHI&CHI	Spe32|Spe41	GMYN	0.62795	4.76431	0.131803	3.12e-69	2502	573.873	1928.13	NA	1277	471.595	805.405	NA	NA	1.57669	1.13629:1.83772:1:1:1:1	0.436651(0.467626:0.359113:0.483213)	NA	NA	NA	NA
ABCA4	DIP&CHI	Spe11|Spe35	GMYN	0.636875	4.88257	0.130439	4.65e-114	3198	671.887	2526.11	NA	1659	595.852	1063.15	NA	NA	1.52888	0.984811:1.53919:1:1:1:1	0.414947(0.474672:0.373827:0.396341)	NA	NA	NA	NA
ABCA4	DIP&DIP	Spe44|Spe45	GMYN	0.0588486	1.53001	0.0384629	6.93e-291	4569	1161.44	3407.56	NA	852	659.788	192.212	NA	NA	0.432819	1.81347:2.52829:1:1:1:1	0.452287(0.500657:0.394288:0.461917)	NA	NA	NA	NA
ABCA4	CHI&CHI	Spe01|Spe39	GMYN	1.00812	4.77354	0.21119	1.19e-21	2448	580.984	1867.02	NA	1455	441.834	1013.17	NA	NA	1.90177	1.27554:1.60858:1:1:1:1	0.462214(0.485294:0.370098:0.53125)	NA	NA	NA	NA
ABCA4	CHI&DIP	Spe02|Spe15	GMYN	0.948983	4.62946	0.204988	7.12e-32	2175	479.435	1695.56	NA	1278	389.63	888.37	NA	NA	1.76027	0.919653:1.39803:1:1:1:1	0.407356(0.461379:0.349655:0.411034)	NA	NA	NA	NA
ABCA4	DIP&DIP	Spe12|Spe50	GMYN	0.860066	4.23616	0.20303	2.42e-20	1173	283.784	889.216	NA	675	228.201	446.799	NA	NA	1.67684	1.37049:1.39803:1:1:1:1	0.467178(0.534527:0.378517:0.488491)	NA	NA	NA	NA
ABCA4	DIP&PAU	Spe43|Spe51	GMYN	0.746413	5.29388	0.140995	2.23e-82	4878	1162.71	3715.29	NA	2632	905.013	1726.99	NA	NA	1.83034	1.45892:1.7323:1:1:1:1	0.47827(0.4877:0.372386:0.574723)	NA	NA	NA	NA
ABCA4	CHI&CHI	Spe05|Spe39	GMYN	0.700853	4.79116	0.14628	2.38e-45	2433	594.794	1838.21	NA	1282	459.398	822.602	NA	NA	1.70081	1.51029:1.54329:1:1:1:1	0.451706(0.48397:0.361282:0.509864)	NA	NA	NA	NA
ABCA4	PAU&SYM	Spe10|Spe52	GMYN	0.524691	5.28081	0.0993581	1.03e-219	5190	1142.62	4047.38	NA	2508	1003.32	1504.68	NA	NA	1.57179	0.962566:1.57151:1:1:1:1	0.516667(0.513006:0.4:0.636994)	NA	NA	NA	NA
ABCA4	DIP&DIP	Spe48|Spe50	GMYN	0.782322	5.27549	0.148294	9.88e-80	4773	1134.54	3638.46	NA	2628	893.371	1734.63	NA	NA	1.85035	1.42066:1.83394:1:1:1:1	0.43128(0.457574:0.361722:0.474544)	NA	NA	NA	NA
ABCA4	PAU&CHI	Spe10|Spe39	GMYN	0.987328	4.71232	0.209521	8.89e-35	2304	535.443	1768.56	NA	1392	440.884	951.116	NA	NA	1.85301	1.28643:1.47949:1:1:1:1	0.50434(0.503906:0.40625:0.602865)	NA	NA	NA	NA
ABCA4	DIP&DIP	Spe46|Spe49	GMYN	1.08325	4.55865	0.237624	3.68e-27	1914	436.245	1477.75	NA	1193	363.502	829.498	NA	NA	1.87537	1.19972:1.5606:1:1:1:1	0.507837(0.513323:0.401254:0.608934)	NA	NA	NA	NA
ABCA4	CHI&DIP	Spe01|Spe44	GMYN	0.692981	5.27628	0.131339	1.72e-81	4848	1135.74	3712.26	NA	2514	864.962	1649.04	NA	NA	1.76671	1.2389:1.77415:1:1:1:1	0.431002(0.486386:0.357983:0.448639)	NA	NA	NA	NA
ABCA4	CHI&DIP	Spe02|Spe43	GMYN	0.802962	4.7739	0.168199	4.19e-39	2478	581.258	1896.74	NA	1374	455.969	918.031	NA	NA	1.73441	1.4434:2.14501:1:1:1:1	0.469532(0.476392:0.3523:0.579903)	NA	NA	NA	NA
ABCA4	DIP&DIP	Spe12|Spe43	GMYN	1.00635	4.53158	0.222076	5.79e-27	1770	420.779	1349.22	NA	1078	346.465	731.535	NA	NA	1.8444	1.3104:1.85355:1:1:1:1	0.472316(0.504237:0.385593:0.527119)	NA	NA	NA	NA
ABCA4	SYM&CHI	Spe09|Spe40	GMYN	0.948283	4.47948	0.211695	1.06e-23	1692	392.539	1299.46	NA	998	314.066	683.934	NA	NA	1.76751	1.1599:1.31624:1:1:1:1	0.428191(0.487589:0.374113:0.422872)	NA	NA	NA	NA
ABCA4	CHI&CHI	Spe37|Spe40	GMYN	0.969033	3.88471	0.249448	3.94e-19	840	177.613	662.387	NA	503	155.126	347.874	NA	NA	1.58554	0.671902:1.63088:1:1:1:1	0.43631(0.530357:0.403571:0.375)	NA	NA	NA	NA
ABCA4	CHI&DIP	Spe41|Spe44	GMYN	0.672475	4.89689	0.137327	3.72e-55	2850	684.842	2165.16	NA	1475	528.738	946.262	NA	NA	1.68758	1.41648:1.62057:1:1:1:1	0.456316(0.487895:0.368421:0.512632)	NA	NA	NA	NA
A_crys	CHI&CHI	Spe01|Spe41	GMYN	0.902645	1.89108	0.477318	8.84e-05	612	158.345	453.655	NA	342	109.217	232.783	NA	NA	1.15839	1.34051:1.6206:1:1:1:1	0.517157(0.612745:0.42402:0.514706)	NA	NA	NA	NA
A_crys	CHI&CHI	Spe03|Spe35	GMYN	0.578564	3.53374	0.163726	6.51e-42	522	111.236	410.764	NA	275	112.693	162.307	NA	NA	1.2083	0.705695:1.13647:1:1:1:1	0.469349(0.528736:0.376437:0.502874)	NA	NA	NA	NA
A_crys	DIP&DIP	Spe14|Spe16	GMYN	0.473154	3.59169	0.131736	1.32e-23	498	120.172	377.828	NA	233	102.366	130.634	NA	NA	1.22568	1.44125:2.38066:1:1:1:1	0.508032(0.572289:0.38253:0.569277)	NA	NA	NA	NA
A_crys	DIP&DIP	Spe14|Spe49	GMYN	0.383241	3.6891	0.103885	4.36e-21	519	136.839	382.161	NA	217	103.528	113.472	NA	NA	1.25486	1.4764:1.85244:1:1:1:1	0.511561(0.621387:0.387283:0.526012)	NA	NA	NA	NA
A_crys	CHI&DIP	Spe05|Spe47	GMYN	0.715076	3.46869	0.206152	4.43e-11	444	101.995	342.005	NA	237	82.4676	154.532	NA	NA	1.34763	0.880035:1.4949:1:1:1:1	0.532658(0.625:0.405405:0.567568)	NA	NA	NA	NA
A_crys	CHI&CHI	Spe31|Spe34	GMYN	0.693294	3.60825	0.192141	6.49e-12	564	122.854	441.146	NA	291	96.2115	194.789	NA	NA	1.32825	0.633882:1.77557:1:1:1:1	0.498227(0.529255:0.420213:0.545213)	NA	NA	NA	NA
A_crys	DIP&DIP	Spe14|Spe42	GMYN	0.265618	3.6217	0.0733405	2.37e-43	522	125.078	396.922	NA	199	111.362	87.6377	NA	NA	1.06978	0.559417:2.19146:1:1:1:1	0.543103(0.609195:0.408046:0.612069)	NA	NA	NA	NA
A_crys	CHI&SYM	Spe05|Spe08	GMYN	0.515866	3.65979	0.140955	1.63e-19	534	131.593	402.407	NA	255	106.825	148.175	NA	NA	1.29062	1.81023:1.39102:1:1:1:1	0.48221(0.573034:0.370787:0.502809)	NA	NA	NA	NA
A_crys	CHI&DIP	Spe39|Spe42	GMYN	0.727161	3.59676	0.202171	3.16e-09	510	120.986	389.014	NA	268	91.3797	176.62	NA	NA	1.40791	1.04443:1.71379:1:1:1:1	0.492157(0.561765:0.4:0.514706)	NA	NA	NA	NA
A_crys	CHI&CHI	Spe31|Spe41	GMYN	0.439872	3.78138	0.116326	1.45e-23	603	154.754	448.246	NA	269	121.501	147.499	NA	NA	1.29744	1.29588:1.48978:1:1:1:1	0.566335(0.609453:0.455224:0.634328)	NA	NA	NA	NA
A_crys	SYM&DIP	Spe07|Spe13	GMYN	0.800633	3.67736	0.217719	3.74e-11	579	134.713	444.287	NA	320	107.057	212.943	NA	NA	1.46995	0.78668:1.74195:1:1:1:1	0.482729(0.505181:0.401554:0.541451)	NA	NA	NA	NA
A_crys	CHI&CHI	Spe02|Spe34	GMYN	0.91902	3.48335	0.263832	1.01e-11	537	104.008	432.992	NA	310	89.2851	220.715	NA	NA	1.41569	0.559419:1.25158:1:1:1:1	0.434823(0.51676:0.349162:0.438547)	NA	NA	NA	NA
A_crys	CHI&SYM	Spe41|Spe52	GMYN	0.365332	3.54254	0.103127	1.61e-30	555	112.549	442.451	NA	224	97.7671	126.233	NA	NA	1.00964	0.72116:1.18774:1:1:1:1	0.578378(0.621622:0.402703:0.710811)	NA	NA	NA	NA
A_crys	CHI&CHI	Spe34|Spe37	GMYN	0.820403	3.56008	0.230445	0	636	115.212	520.788	NA	378	126.735	251.265	NA	NA	1.3167	0.454471:0.780266:1:1:1:1	0.458333(0.544811:0.370283:0.459906)	NA	NA	NA	NA
A_crys	SYM&SYM	Spe07|Spe09	GMYN	0.661848	3.2712	0.202326	3.85e-23	456	78.3826	377.617	NA	239	76.9915	162.008	NA	NA	1.11037	0.703039:1.60565:1:1:1:1	0.51864(0.516447:0.351974:0.6875)	NA	NA	NA	NA
A_crys	DIP&CHI	Spe16|Spe31	GMYN	0.528168	3.61476	0.146114	1.3e-27	513	123.926	389.074	NA	258	112.487	145.513	NA	NA	1.2738	1.63248:2.02825:1:1:1:1	0.5(0.538012:0.400585:0.561404)	NA	NA	NA	NA
A_crys	SYM&CHI	Spe08|Spe39	GMYN	0.568502	3.49314	0.162748	2.24e-30	501	105.374	395.626	NA	256	101.692	154.308	NA	NA	1.18363	0.743857:1.07278:1:1:1:1	0.478044(0.55988:0.365269:0.508982)	NA	NA	NA	NA
A_crys	SYM&DIP	Spe07|Spe11	GMYN	0.612664	3.42284	0.178993	4.35e-16	459	95.9466	363.053	NA	232	82.6918	149.308	NA	NA	1.20009	0.86017:1.46478:1:1:1:1	0.527233(0.555556:0.372549:0.653595)	NA	NA	NA	NA
A_crys	CHI&CHI	Spe32|Spe33	GMYN	0.562942	3.62164	0.155439	3.49e-21	537	125.068	411.932	NA	267	106.668	160.332	NA	NA	1.27531	1.02508:1.62623:1:1:1:1	0.47486(0.583799:0.405028:0.435754)	NA	NA	NA	NA
A_crys	CHI&DIP	Spe37|Spe44	GMYN	0.775864	3.53202	0.219666	3.32e-25	519	110.982	408.018	NA	300	107.121	192.879	NA	NA	1.36523	0.920298:1.1527:1:1:1:1	0.470135(0.583815:0.352601:0.473988)	NA	NA	NA	NA
A_crys	DIP&CHI	Spe17|Spe32	GMYN	0.442179	3.56978	0.123867	0	537	116.712	420.288	NA	256	117.848	138.152	NA	NA	1.12194	0.760321:1.28694:1:1:1:1	0.538175(0.606145:0.410615:0.597765)	NA	NA	NA	NA
A_crys	CHI&CHI	Spe02|Spe05	GMYN	0.813077	3.50281	0.232122	3.39e-20	534	106.741	427.259	NA	305	99.6861	205.314	NA	NA	1.35073	0.700915:1.59188:1:1:1:1	0.437266(0.530899:0.356742:0.424157)	NA	NA	NA	NA
A_crys	CHI&DIP	Spe34|Spe46	GMYN	0.696323	3.46012	0.201243	4.64e-31	528	100.836	427.164	NA	290	100.346	189.654	NA	NA	1.22414	0.689512:1.29437:1:1:1:1	0.557765(0.602273:0.377841:0.693182)	NA	NA	NA	NA
A_crys	DIP&PAU	Spe11|Spe51	GMYN	0.848192	3.56772	0.237741	2.38e-10	546	116.391	429.609	NA	307	94.3539	212.646	NA	NA	1.42792	0.727144:2.20767:1:1:1:1	0.504579(0.543956:0.362637:0.607143)	NA	NA	NA	NA
A_crys	SYM&CHI	Spe09|Spe35	GMYN	0.803147	3.5168	0.228375	5.4e-11	510	108.752	401.248	NA	283	89.6749	193.325	NA	NA	1.3818	1.40044:1.96752:1:1:1:1	0.504902(0.517647:0.373529:0.623529)	NA	NA	NA	NA
A_crys	PAU&CHI	Spe10|Spe35	GMYN	0.879254	3.58269	0.245417	1.82e-07	516	118.738	397.262	NA	291	91.2983	199.702	NA	NA	1.50135	0.844342:1.95715:1:1:1:1	0.487403(0.523256:0.40407:0.534884)	NA	NA	NA	NA
A_crys	CHI&SYM	Spe32|Spe52	GMYN	0.387112	3.75633	0.103056	2.12e-28	573	149.671	423.329	NA	248	121.254	126.746	NA	NA	1.26717	1.70749:1.43781:1:1:1:1	0.525305(0.612565:0.41623:0.54712)	NA	NA	NA	NA
A_crys	DIP&DIP	Spe11|Spe47	GMYN	0.606826	1.35284	0.448556	0.000604743	456	119.391	336.609	NA	209	70.8824	138.118	NA	NA	0.802149	2.15498:2.04319:1:1:1:1	0.544956(0.618421:0.398026:0.618421)	NA	NA	NA	NA
A_crys	CHI&CHI	Spe01|Spe02	GMYN	0.749739	3.49446	0.214551	2.67e-25	555	105.56	449.44	NA	308	101.531	206.469	NA	NA	1.27178	0.697703:1.03437:1:1:1:1	0.45045(0.540541:0.375676:0.435135)	NA	NA	NA	NA
A_crys	CHI&DIP	Spe04|Spe50	GMYN	0.362315	3.50163	0.10347	5.09e-45	540	106.575	433.425	NA	228	104.797	123.203	NA	NA	0.981893	1.15527:1.1365:1:1:1:1	0.589815(0.602778:0.430556:0.736111)	NA	NA	NA	NA
A_crys	DIP&DIP	Spe17|Spe50	GMYN	0.400192	3.31733	0.120637	0	543	83.3547	459.645	NA	230	89.0891	140.911	NA	NA	0.847995	1.17301:1.7062:1:1:1:1	0.609576(0.610497:0.400552:0.81768)	NA	NA	NA	NA
A_crys	CHI&PAU	Spe02|Spe10	GMYN	1.09054	3.40559	0.32022	5.67e-12	471	93.7651	377.235	NA	294	85.4959	208.504	NA	NA	1.55141	0.779187:1.02728:1:1:1:1	0.447983(0.531847:0.382166:0.429936)	NA	NA	NA	NA
A_crys	SYM&DIP	Spe08|Spe46	GMYN	0.354221	3.42824	0.103324	0	531	96.6394	434.361	NA	220	99.1859	120.814	NA	NA	0.913677	0.576403:1.22941:1:1:1:1	0.586629(0.641243:0.378531:0.740113)	NA	NA	NA	NA
A_crys	SYM&DIP	Spe08|Spe49	GMYN	0.438349	3.75555	0.11672	3.6e-24	564	149.516	414.484	NA	255	119.158	135.842	NA	NA	1.31774	1.52132:1.94108:1:1:1:1	0.490248(0.609043:0.388298:0.473404)	NA	NA	NA	NA
A_crys	DIP&CHI	Spe12|Spe41	GMYN	0.371221	3.60391	0.103005	2.73e-23	513	122.146	390.854	NA	210	96.9093	113.091	NA	NA	1.14093	1.70519:2.08449:1:1:1:1	0.550682(0.593567:0.383041:0.675439)	NA	NA	NA	NA
A_crys	CHI&CHI	Spe05|Spe37	GMYN	0.77873	3.63547	0.214203	2.75e-18	567	127.395	439.605	NA	321	112.938	208.062	NA	NA	1.42059	1.42049:1.82276:1:1:1:1	0.442681(0.52381:0.354497:0.449735)	NA	NA	NA	NA
A_crys	DIP&DIP	Spe11|Spe46	GMYN	0.425121	3.5391	0.120121	3.48e-31	531	112.034	418.966	NA	236	101.671	134.329	NA	NA	1.08213	1.3894:1.99865:1:1:1:1	0.588512(0.644068:0.39548:0.725989)	NA	NA	NA	NA
A_crys	DIP&CHI	Spe14|Spe31	GMYN	0.370507	3.61352	0.102534	4.02e-24	522	123.72	398.28	NA	214	98.6762	115.324	NA	NA	1.13914	1.51422:1.42641:1:1:1:1	0.544061(0.591954:0.408046:0.632184)	NA	NA	NA	NA
A_crys	CHI&CHI	Spe35|Spe36	GMYN	0.608127	3.65782	0.166254	2.97e-20	546	131.249	414.751	NA	281	111.708	169.292	NA	NA	1.34122	0.886181:2.01271:1:1:1:1	0.489927(0.57967:0.395604:0.494505)	NA	NA	NA	NA
A_crys	SYM&CHI	Spe08|Spe40	GMYN	0.818168	3.57806	0.228662	2.9e-14	519	118.008	400.992	NA	295	101.328	193.672	NA	NA	1.4457	0.769109:1.48819:1:1:1:1	0.503854(0.589595:0.407514:0.514451)	NA	NA	NA	NA
A_crys	SYM&SYM	Spe07|Spe08	GMYN	0.544103	3.49981	0.155466	7.98e-23	480	106.316	373.684	NA	237	95.0568	141.943	NA	NA	1.19877	1.07293:1.66089:1:1:1:1	0.522917(0.56875:0.371875:0.628125)	NA	NA	NA	NA
A_crys	DIP&DIP	Spe16|Spe43	GMYN	0.697447	3.63332	0.191959	4.27e-20	546	127.03	418.97	NA	299	112.339	186.661	NA	NA	1.3805	1.38545:2.17104:1:1:1:1	0.531136(0.56044:0.442308:0.590659)	NA	NA	NA	NA
A_crys	DIP&CHI	Spe15|Spe35	GMYN	0.561772	3.6012	0.155996	3.29e-14	501	121.704	379.296	NA	242	94.6557	147.344	NA	NA	1.30012	1.37104:2.18124:1:1:1:1	0.508982(0.568862:0.374251:0.583832)	NA	NA	NA	NA
A_crys	CHI&CHI	Spe39|Spe41	GMYN	0.65719	1.87525	0.350455	1.7e-06	477	112.529	364.471	NA	234	77.4715	156.529	NA	NA	0.944542	1.53929:2.03408:1:1:1:1	0.512579(0.540881:0.380503:0.616352)	NA	NA	NA	NA
A_crys	CHI&CHI	Spe02|Spe40	GMYN	0.871342	3.58923	0.242766	1.08e-11	564	119.778	444.222	NA	322	99.605	222.395	NA	NA	1.44855	1.03167:1.40066:1:1:1:1	0.463652(0.550532:0.404255:0.43617)	NA	NA	NA	NA
A_crys	CHI&DIP	Spe41|Spe43	GMYN	0.820664	3.67058	0.223579	3.15e-10	561	133.5	427.5	NA	315	105.614	209.386	NA	NA	1.49885	1.33467:2.22225:1:1:1:1	0.595365(0.612299:0.486631:0.687166)	NA	NA	NA	NA
A_crys	CHI&CHI	Spe01|Spe31	GMYN	0.880134	3.76445	0.233801	6.36e-10	645	151.301	493.699	NA	368	118.272	249.728	NA	NA	1.55672	1.01837:1.0164:1:1:1:1	0.507752(0.555814:0.460465:0.506977)	NA	NA	NA	NA
A_crys	DIP&CHI	Spe12|Spe36	GMYN	0.305635	3.67252	0.083222	1.15e-40	567	133.847	433.153	NA	225	117.483	107.517	NA	NA	1.10043	0.85063:1.40531:1:1:1:1	0.5(0.587302:0.410053:0.502646)	NA	NA	NA	NA
A_crys	CHI&CHI	Spe35|Spe41	GMYN	0.515532	3.50635	0.147028	5.43e-25	495	107.247	387.753	NA	239	96.7337	142.266	NA	NA	1.16352	1.09303:1.6778:1:1:1:1	0.545455(0.575758:0.384848:0.675758)	NA	NA	NA	NA
A_crys	SYM&CHI	Spe09|Spe32	GMYN	0.575741	3.56799	0.161363	1.04e-32	534	116.433	417.567	NA	277	112.108	164.892	NA	NA	1.22817	0.93639:1.56038:1:1:1:1	0.484082(0.542135:0.396067:0.514045)	NA	NA	NA	NA
A_crys	DIP&SYM	Spe42|Spe52	GMYN	0.300566	3.6481	0.0823897	1.9e-35	543	129.558	413.442	NA	211	109.605	101.395	NA	NA	1.09928	1.07904:1.73235:1:1:1:1	0.552486(0.61326:0.411602:0.632597)	NA	NA	NA	NA
A_crys	SYM&DIP	Spe09|Spe45	GMYN	0.618782	3.48489	0.177562	4.38e-20	516	104.221	411.779	NA	263	92.8914	170.109	NA	NA	1.19767	0.875922:1.78813:1:1:1:1	0.516473(0.55814:0.375:0.616279)	NA	NA	NA	NA
A_crys	CHI&DIP	Spe39|Spe48	GMYN	0.614906	3.5202	0.17468	3.41e-15	519	109.245	409.755	NA	258	89.9712	168.029	NA	NA	1.22645	1.04645:1.19376:1:1:1:1	0.466281(0.569364:0.393064:0.436416)	NA	NA	NA	NA
A_crys	DIP&CHI	Spe15|Spe36	GMYN	0.277699	3.62625	0.0765802	1.25e-59	570	125.839	444.161	NA	225	123.225	101.775	NA	NA	1.01696	0.584636:1.81522:1:1:1:1	0.494737(0.607895:0.415789:0.460526)	NA	NA	NA	NA
A_crys	DIP&DIP	Spe16|Spe48	GMYN	0.489064	3.62084	0.135069	1.45e-21	513	124.933	388.067	NA	241	103.556	137.444	NA	NA	1.25176	1.63021:1.99974:1:1:1:1	0.45614(0.561404:0.374269:0.432749)	NA	NA	NA	NA
A_crys	DIP&DIP	Spe13|Spe43	GMYN	0.982938	3.79858	0.258765	7.96e-14	609	158.344	450.656	NA	377	135.031	241.969	NA	NA	1.71502	1.21609:1.92922:1:1:1:1	0.544335(0.583744:0.487685:0.561576)	NA	NA	NA	NA
A_crys	CHI&CHI	Spe33|Spe38	GMYN	0.433299	3.5691	0.121403	6.43e-30	510	116.606	393.394	NA	232	104.499	127.501	NA	NA	1.15027	0.71944:1.35192:1:1:1:1	0.484314(0.558824:0.397059:0.497059)	NA	NA	NA	NA
A_crys	CHI&SYM	Spe03|Spe08	GMYN	0.563007	3.64675	0.154386	1.02e-37	570	129.325	440.675	NA	296	125.426	170.574	NA	NA	1.26267	0.671419:1.93448:1:1:1:1	0.471053(0.563158:0.376316:0.473684)	NA	NA	NA	NA
A_crys	DIP&DIP	Spe12|Spe42	GMYN	0.263018	3.4871	0.075426	7.97e-28	552	133.359	418.641	NA	191	99.0624	91.9376	NA	NA	1.04193	0.772788:1.6171:1:1:1:1	0.529891(0.592391:0.413043:0.584239)	NA	NA	NA	NA
A_crys	CHI&PAU	Spe35|Spe51	GMYN	0.861456	3.53263	0.243857	7.11e-11	510	111.071	398.929	NA	287	91.3559	195.644	NA	NA	1.4432	0.848163:3.45263:1:1:1:1	0.515686(0.520588:0.364706:0.661765)	NA	NA	NA	NA
A_crys	DIP&CHI	Spe12|Spe33	GMYN	0.463031	3.59238	0.128893	3.46e-29	525	120.283	404.717	NA	245	107.137	137.863	NA	NA	1.18	1.08963:0.968742:1:1:1:1	0.498095(0.58:0.365714:0.548571)	NA	NA	NA	NA
A_crys	CHI&DIP	Spe04|Spe16	GMYN	0.544224	3.61702	0.150462	1.35e-23	513	124.299	388.701	NA	257	108.582	148.418	NA	NA	1.28876	1.63651:1.93296:1:1:1:1	0.506823(0.546784:0.397661:0.576023)	NA	NA	NA	NA
A_crys	CHI&DIP	Spe04|Spe48	GMYN	0.483941	3.71487	0.130271	6.91e-29	597	141.621	455.379	NA	282	122.26	159.74	NA	NA	1.25039	0.759783:1.41011:1:1:1:1	0.521776(0.603015:0.439698:0.522613)	NA	NA	NA	NA
A_crys	SYM&CHI	Spe09|Spe31	GMYN	0.627193	3.47523	0.180475	9.85e-37	522	102.887	419.113	NA	278	103.922	174.078	NA	NA	1.18855	0.537899:2.08791:1:1:1:1	0.520115(0.537356:0.390805:0.632184)	NA	NA	NA	NA
A_crys	SYM&DIP	Spe08|Spe45	GMYN	0.389777	3.64592	0.106908	2.48e-28	528	129.183	398.817	NA	228	108.324	119.676	NA	NA	1.18644	1.23464:1.7593:1:1:1:1	0.520833(0.622159:0.357955:0.582386)	NA	NA	NA	NA
A_crys	DIP&CHI	Spe17|Spe39	GMYN	0.692798	3.4508	0.200764	4.53e-21	489	99.5909	389.409	NA	265	92.4369	172.563	NA	NA	1.2545	1.25088:1.77997:1:1:1:1	0.529652(0.555215:0.371166:0.662577)	NA	NA	NA	NA
A_crys	DIP&PAU	Spe45|Spe51	GMYN	0.79903	3.47081	0.230214	1.99e-41	534	102.284	431.716	NA	314	108.291	205.709	NA	NA	1.31079	0.374941:1.42933:1:1:1:1	0.512172(0.55618:0.36236:0.617978)	NA	NA	NA	NA
A_crys	CHI&CHI	Spe04|Spe38	GMYN	0.359294	3.60708	0.0996082	1.52e-33	537	122.663	414.337	NA	225	107.94	117.06	NA	NA	1.10116	1.11005:1.13918:1:1:1:1	0.517691(0.569832:0.407821:0.575419)	NA	NA	NA	NA
A_crys	CHI&PAU	Spe31|Spe51	GMYN	0.780961	3.58446	0.217874	3.4e-18	543	119.019	423.981	NA	308	106.117	201.883	NA	NA	1.39545	1.35369:2.11434:1:1:1:1	0.52302(0.513812:0.400552:0.654696)	NA	NA	NA	NA
A_crys	DIP&DIP	Spe11|Spe45	GMYN	0.215487	2.24356	0.0960468	3.14e-27	534	124.883	409.117	NA	165	88.9589	76.0411	NA	NA	0.68978	0.932146:1.22527:1:1:1:1	0.524345(0.620787:0.376404:0.575843)	NA	NA	NA	NA
A_crys	DIP&CHI	Spe17|Spe36	GMYN	0.446884	3.56927	0.125203	0	537	116.632	420.368	NA	257	117.785	139.215	NA	NA	1.12504	0.749575:1.25761:1:1:1:1	0.539106(0.608939:0.410615:0.597765)	NA	NA	NA	NA
A_crys	CHI&DIP	Spe36|Spe50	GMYN	0.297796	3.61521	0.0823731	0	555	123.999	431.001	NA	233	128.296	104.704	NA	NA	1.03898	0.691837:1.25594:1:1:1:1	0.545045(0.610811:0.432432:0.591892)	NA	NA	NA	NA
A_crys	DIP&DIP	Spe13|Spe49	GMYN	0.753377	3.78103	0.199252	2.3e-17	678	154.682	523.318	NA	372	129.383	242.617	NA	NA	1.44412	0.784013:1.68047:1:1:1:1	0.45944(0.570796:0.400442:0.40708)	NA	NA	NA	NA
A_crys	CHI&DIP	Spe04|Spe49	GMYN	0.595897	3.81847	0.156056	1.6e-20	621	162.601	458.399	NA	318	132.929	185.071	NA	NA	1.43969	0.877535:1.59975:1:1:1:1	0.520129(0.615942:0.442029:0.502415)	NA	NA	NA	NA
A_crys	DIP&DIP	Spe11|Spe49	GMYN	0.292332	3.63815	0.0803517	7.62e-36	519	127.852	391.148	NA	202	108.239	93.7612	NA	NA	1.11655	1.03898:1.15869:1:1:1:1	0.491329(0.609827:0.384393:0.479769)	NA	NA	NA	NA
A_crys	DIP&DIP	Spe14|Spe15	GMYN	0.246165	3.64536	0.0675282	3.12e-35	516	129.086	386.914	NA	185	104.573	80.4265	NA	NA	1.09653	1.63397:2.39432:1:1:1:1	0.531008(0.613372:0.380814:0.598837)	NA	NA	NA	NA
A_crys	CHI&CHI	Spe02|Spe36	GMYN	0.602222	3.51966	0.171102	2.22e-13	504	109.167	394.833	NA	247	86.5583	160.442	NA	NA	1.23414	1.36801:1.31485:1:1:1:1	0.443452(0.550595:0.377976:0.401786)	NA	NA	NA	NA
A_crys	CHI&DIP	Spe33|Spe50	GMYN	0.549404	3.59294	0.152912	1.26e-30	549	120.372	428.628	NA	277	112.904	164.096	NA	NA	1.21672	0.823507:1.47017:1:1:1:1	0.550091(0.590164:0.423497:0.636612)	NA	NA	NA	NA
A_crys	CHI&DIP	Spe38|Spe48	GMYN	0.37345	3.62465	0.103031	1.63e-23	546	125.571	420.429	NA	221	98.9224	122.078	NA	NA	1.12117	1.00213:1.59416:1:1:1:1	0.481685(0.590659:0.403846:0.450549)	NA	NA	NA	NA
A_crys	DIP&DIP	Spe42|Spe44	GMYN	0.274039	3.48714	0.0785857	6.6e-27	531	136.206	394.794	NA	191	101.177	89.8229	NA	NA	1.09822	1.10835:1.70435:1:1:1:1	0.50565(0.596045:0.39548:0.525424)	NA	NA	NA	NA
A_crys	DIP&DIP	Spe46|Spe50	GMYN	0.386085	3.22894	0.11957	0	537	74.088	462.912	NA	223	84.8696	138.13	NA	NA	0.778304	1.01821:1.31398:1:1:1:1	0.646182(0.659218:0.418994:0.860335)	NA	NA	NA	NA
A_crys	DIP&SYM	Spe46|Spe52	GMYN	0.35427	3.36015	0.105433	0	534	88.2522	445.748	NA	219	94.4541	124.546	NA	NA	0.85104	1.2277:1.66231:1:1:1:1	0.620787(0.646067:0.407303:0.808989)	NA	NA	NA	NA
A_crys	CHI&SYM	Spe40|Spe52	GMYN	0.71419	3.5472	0.201339	1.71e-18	519	113.251	405.749	NA	283	100.489	182.511	NA	NA	1.33238	0.779643:1.19233:1:1:1:1	0.529865(0.592486:0.416185:0.580925)	NA	NA	NA	NA
A_crys	DIP&SYM	Spe13|Spe52	GMYN	0.628476	3.62714	0.17327	8.51e-22	555	125.988	429.012	NA	290	110.95	179.05	NA	NA	1.30919	0.708126:1.22214:1:1:1:1	0.510811(0.583784:0.391892:0.556757)	NA	NA	NA	NA
A_crys	DIP&PAU	Spe47|Spe51	GMYN	0.745225	3.41131	0.218457	1.81e-10	414	94.4825	319.518	NA	225	77.3002	147.7	NA	NA	1.35368	1.02141:2.72005:1:1:1:1	0.531401(0.57971:0.365942:0.648551)	NA	NA	NA	NA
A_crys	CHI&DIP	Spe34|Spe42	GMYN	0.802088	3.66072	0.219106	4.62e-14	546	131.758	414.242	NA	310	110.939	199.061	NA	NA	1.49192	0.895057:1.69327:1:1:1:1	0.495421(0.571429:0.395604:0.519231)	NA	NA	NA	NA
A_crys	DIP&DIP	Spe13|Spe47	GMYN	0.620891	3.58995	0.172953	2.13e-25	498	119.893	378.107	NA	267	110.316	156.684	NA	NA	1.33569	0.63937:1.4245:1:1:1:1	0.504016(0.581325:0.409639:0.521084)	NA	NA	NA	NA
A_crys	SYM&DIP	Spe09|Spe43	GMYN	0.786911	3.52149	0.22346	2.37e-30	522	109.433	412.567	NA	307	109.167	197.833	NA	NA	1.36019	1.27737:1.32042:1:1:1:1	0.552682(0.545977:0.445402:0.666667)	NA	NA	NA	NA
A_crys	DIP&CHI	Spe13|Spe40	GMYN	0.933512	3.70681	0.251837	2.61e-08	588	140.108	447.892	NA	344	109.967	234.033	NA	NA	1.59433	1.23836:1.15705:1:1:1:1	0.47619(0.566327:0.420918:0.441327)	NA	NA	NA	NA
A_crys	CHI&DIP	Spe35|Spe49	GMYN	0.629416	3.69426	0.170377	2.23e-23	579	137.782	441.218	NA	306	121.253	184.747	NA	NA	1.35874	1.00271:1.26359:1:1:1:1	0.492228(0.595855:0.370466:0.510363)	NA	NA	NA	NA
A_crys	CHI&DIP	Spe02|Spe11	GMYN	0.655279	3.51063	0.186655	1.76e-17	489	107.861	381.139	NA	256	93.2883	162.712	NA	NA	1.2851	0.979165:1.66796:1:1:1:1	0.469325(0.56135:0.352761:0.493865)	NA	NA	NA	NA
A_crys	SYM&DIP	Spe07|Spe17	GMYN	0.64451	3.25637	0.197923	1.17e-18	477	76.8482	400.152	NA	241	71.5749	169.425	NA	NA	1.0653	0.728392:1.59695:1:1:1:1	0.566038(0.54717:0.386792:0.764151)	NA	NA	NA	NA
A_crys	CHI&CHI	Spe36|Spe39	GMYN	0.657294	3.53967	0.185693	7.48e-16	513	112.119	400.881	NA	266	94.4416	171.558	NA	NA	1.28726	1.07884:1.22437:1:1:1:1	0.465887(0.561404:0.418129:0.418129)	NA	NA	NA	NA
A_crys	CHI&DIP	Spe41|Spe50	GMYN	0.416034	3.41886	0.121688	7.79e-40	519	95.4389	423.561	NA	228	94.5563	133.444	NA	NA	0.968224	0.944742:0.928841:1:1:1:1	0.598266(0.624277:0.401734:0.768786)	NA	NA	NA	NA
A_crys	CHI&CHI	Spe02|Spe39	GMYN	0.0101021	0.396174	0.0254991	2.01e-21	546	146.319	399.681	NA	45	40.9992	4.00078	NA	NA	0.113563	3.85929:4.31766:1:1:1:1	0.440476(0.53022:0.346154:0.445055)	NA	NA	NA	NA
A_crys	DIP&DIP	Spe15|Spe17	GMYN	0.434353	3.48428	0.124661	0	540	104.137	435.863	NA	255	113.609	141.391	NA	NA	1.02252	0.769514:1.60091:1:1:1:1	0.562037(0.611111:0.386111:0.688889)	NA	NA	NA	NA
A_crys	DIP&DIP	Spe44|Spe46	GMYN	0.435601	3.57507	0.121844	4.88e-28	528	117.537	410.463	NA	237	103.158	133.842	NA	NA	1.13447	1.15596:2.11893:1:1:1:1	0.580492(0.642045:0.397727:0.701705)	NA	NA	NA	NA
A_crys	CHI&PAU	Spe01|Spe51	GMYN	0.776412	3.54153	0.219231	1.07e-18	579	112.397	466.603	NA	321	101.235	219.765	NA	NA	1.31318	0.824481:1.37803:1:1:1:1	0.488774(0.515544:0.357513:0.593264)	NA	NA	NA	NA
A_crys	PAU&DIP	Spe10|Spe44	GMYN	0.883307	4.49377	0.196563	1.32e-06	534	120.401	413.599	NA	299	90.0747	208.925	NA	NA	1.69735	0.864277:1.4346:1:1:1:1	0.478464(0.561798:0.401685:0.47191)	NA	NA	NA	NA
A_crys	CHI&SYM	Spe02|Spe09	GMYN	0.837029	3.35645	0.249379	8.36e-13	480	87.8184	392.182	NA	269	77.9528	191.047	NA	NA	1.29797	0.650105:1.41908:1:1:1:1	0.45625(0.50625:0.3375:0.525)	NA	NA	NA	NA
A_crys	CHI&PAU	Spe04|Spe10	GMYN	0.91511	2.39637	0.381873	3.89e-05	540	126.771	413.229	NA	304	91.1837	212.816	NA	NA	1.26285	0.999487:1.27469:1:1:1:1	0.515741(0.555556:0.436111:0.555556)	NA	NA	NA	NA
A_crys	DIP&CHI	Spe13|Spe37	GMYN	0.945123	3.72	0.254065	1.25e-13	645	142.593	502.407	NA	386	121.914	264.086	NA	NA	1.55858	1.3727:1.33176:1:1:1:1	0.446512(0.544186:0.386047:0.409302)	NA	NA	NA	NA
A_crys	CHI&CHI	Spe31|Spe38	GMYN	0.356969	3.68058	0.0969873	5.6e-29	546	135.292	410.708	NA	226	110.472	115.528	NA	NA	1.18052	1.52868:1.45592:1:1:1:1	0.50641(0.56044:0.414835:0.543956)	NA	NA	NA	NA
A_crys	CHI&DIP	Spe02|Spe48	GMYN	0.555935	3.43688	0.161756	2.95e-16	465	97.7585	367.241	NA	223	81.5903	141.41	NA	NA	1.1616	1.02212:1.07522:1:1:1:1	0.447312(0.580645:0.36129:0.4)	NA	NA	NA	NA
A_crys	CHI&DIP	Spe04|Spe44	GMYN	0.471191	3.675	0.128215	2.41e-22	555	134.29	420.71	NA	255	109.684	145.316	NA	NA	1.2464	1.06486:1.27918:1:1:1:1	0.523423(0.586486:0.418919:0.564865)	NA	NA	NA	NA
A_crys	CHI&CHI	Spe39|Spe40	GMYN	0.64527	3.44886	0.187096	8.17e-20	492	99.3335	392.666	NA	255	89.6372	165.363	NA	NA	1.21131	0.846211:1.24815:1:1:1:1	0.470528(0.539634:0.393293:0.478659)	NA	NA	NA	NA
A_crys	CHI&CHI	Spe02|Spe31	GMYN	0.999073	3.59917	0.277584	5.37e-09	549	121.376	427.624	NA	325	98.6953	226.305	NA	NA	1.57392	0.741934:2.10588:1:1:1:1	0.485428(0.546448:0.398907:0.510929)	NA	NA	NA	NA
A_crys	CHI&PAU	Spe34|Spe51	GMYN	0.843315	3.61531	0.233262	3.35e-14	564	124.016	439.984	NA	323	106.137	216.863	NA	NA	1.45284	1.02448:2.38331:1:1:1:1	0.474291(0.494681:0.353723:0.574468)	NA	NA	NA	NA
A_crys	CHI&DIP	Spe31|Spe44	GMYN	0.446631	3.6659	0.121834	1.05e-23	552	132.671	419.329	NA	248	108.693	139.307	NA	NA	1.22037	1.19113:1.05385:1:1:1:1	0.509058(0.57337:0.407609:0.546196)	NA	NA	NA	NA
A_crys	CHI&DIP	Spe03|Spe45	GMYN	0.586265	3.64179	0.160983	3.36e-18	555	128.474	426.526	NA	276	105.868	170.132	NA	NA	1.29357	0.956617:2.1228:1:1:1:1	0.475676(0.572973:0.375676:0.478378)	NA	NA	NA	NA
A_crys	CHI&DIP	Spe36|Spe49	GMYN	0.333526	3.68465	0.0905175	2.49e-35	588	136.029	451.971	NA	236	115.637	120.363	NA	NA	1.10878	0.813528:1.74095:1:1:1:1	0.47619(0.614796:0.436224:0.377551)	NA	NA	NA	NA
A_crys	CHI&DIP	Spe38|Spe45	GMYN	0.414861	2.96991	0.139688	1.41e-17	519	135.256	383.744	NA	220	99.5078	120.492	NA	NA	1.08073	1.72472:2.41837:1:1:1:1	0.50289(0.595376:0.369942:0.543353)	NA	NA	NA	NA
A_crys	DIP&DIP	Spe14|Spe45	GMYN	0.32721	3.56837	0.0916972	5.04e-26	501	116.493	384.507	NA	194	93.1584	100.842	NA	NA	1.08085	1.06478:1.44047:1:1:1:1	0.541916(0.631737:0.368263:0.625749)	NA	NA	NA	NA
A_crys	CHI&DIP	Spe02|Spe46	GMYN	0.7652	3.55782	0.215075	2.4e-22	540	114.866	425.134	NA	307	107.391	199.609	NA	NA	1.35923	1.27167:1.769:1:1:1:1	0.537037(0.583333:0.397222:0.630556)	NA	NA	NA	NA
A_crys	DIP&DIP	Spe45|Spe50	GMYN	0.36915	3.48043	0.106064	0	519	103.604	415.396	NA	223	103.519	119.481	NA	NA	0.990234	0.723975:1.63251:1:1:1:1	0.572254(0.630058:0.387283:0.699422)	NA	NA	NA	NA
A_crys	DIP&CHI	Spe13|Spe33	GMYN	0.647167	3.69918	0.174949	1.02e-24	588	138.689	449.311	NA	313	123.555	189.445	NA	NA	1.36703	0.815213:2.06024:1:1:1:1	0.455782(0.553571:0.367347:0.446429)	NA	NA	NA	NA
A_crys	DIP&PAU	Spe49|Spe51	GMYN	0.817725	3.65113	0.223965	3.44e-08	546	130.083	415.917	NA	302	98.9035	203.096	NA	NA	1.49278	1.11447:1.80829:1:1:1:1	0.478938(0.543956:0.373626:0.519231)	NA	NA	NA	NA
A_crys	CHI&DIP	Spe33|Spe48	GMYN	0.583154	3.64467	0.160002	5.1e-19	561	128.967	432.033	NA	279	107.062	171.938	NA	NA	1.28696	0.942391:1.36817:1:1:1:1	0.476827(0.572193:0.417112:0.441176)	NA	NA	NA	NA
A_crys	DIP&SYM	Spe11|Spe52	GMYN	0.301211	3.65749	0.0823547	2.08e-39	552	131.191	420.809	NA	218	114.485	103.515	NA	NA	1.09888	1.44726:1.43789:1:1:1:1	0.541667(0.611413:0.380435:0.633152)	NA	NA	NA	NA
A_crys	PAU&DIP	Spe10|Spe45	GMYN	0.828209	2.14956	0.385293	2.91e-05	516	114.018	401.982	NA	277	80.6462	196.354	NA	NA	1.12018	0.873497:1.59774:1:1:1:1	0.497093(0.555233:0.412791:0.523256)	NA	NA	NA	NA
A_crys	CHI&PAU	Spe01|Spe10	GMYN	1.30595	1.6222	0.805046	0.0561815	558	136.129	421.871	NA	332	90.3568	241.643	NA	NA	1.3831	2:2:1:1:1:1	0.466846(0.524194:0.432796:0.443548)	NA	NA	NA	NA
A_crys	CHI&DIP	Spe38|Spe49	GMYN	0.363013	3.60599	0.100669	2.45e-32	531	122.485	408.515	NA	223	106.953	116.047	NA	NA	1.11107	1.02278:1.5966:1:1:1:1	0.475518(0.596045:0.384181:0.446328)	NA	NA	NA	NA
A_crys	DIP&CHI	Spe12|Spe31	GMYN	0.443923	3.69101	0.120271	1.09e-29	570	137.187	432.813	NA	262	118.685	143.315	NA	NA	1.22543	1.37898:1.11021:1:1:1:1	0.538596(0.578947:0.428947:0.607895)	NA	NA	NA	NA
A_crys	DIP&CHI	Spe11|Spe32	GMYN	0.301733	3.62843	0.083158	4.97e-33	552	126.205	425.795	NA	209	104.673	104.327	NA	NA	1.06232	0.743659:1.01463:1:1:1:1	0.488225(0.597826:0.404891:0.461957)	NA	NA	NA	NA
A_crys	DIP&DIP	Spe12|Spe48	GMYN	0.315652	3.68571	0.0856421	2.02e-35	567	136.221	430.779	NA	224	114.239	109.761	NA	NA	1.1253	0.992201:1.52353:1:1:1:1	0.500882(0.592593:0.404762:0.505291)	NA	NA	NA	NA
A_crys	CHI&CHI	Spe36|Spe41	GMYN	0.567906	1.86036	0.305266	3.59e-10	567	150.474	416.526	NA	267	103.409	163.591	NA	NA	0.910906	1.1852:1.86467:1:1:1:1	0.529101(0.640212:0.431217:0.515873)	NA	NA	NA	NA
A_crys	CHI&CHI	Spe35|Spe40	GMYN	0.972888	2.64376	0.367994	3.63e-05	540	126.646	413.354	NA	309	92.1871	216.813	NA	NA	1.36476	0.887549:1.99904:1:1:1:1	0.507407(0.572222:0.408333:0.541667)	NA	NA	NA	NA
A_crys	CHI&CHI	Spe31|Spe40	GMYN	0.672443	3.60267	0.186651	2.98e-10	516	121.944	394.056	NA	263	92.0416	170.958	NA	NA	1.36493	0.75737:1.64442:1:1:1:1	0.516473(0.575581:0.444767:0.52907)	NA	NA	NA	NA
A_crys	CHI&DIP	Spe31|Spe50	GMYN	0.395993	3.57582	0.110742	5.42e-31	555	117.656	437.344	NA	237	103.823	133.177	NA	NA	1.07009	1.36391:1.28971:1:1:1:1	0.577477(0.597297:0.432432:0.702703)	NA	NA	NA	NA
A_crys	CHI&DIP	Spe03|Spe15	GMYN	0.478882	3.57282	0.134035	2.18e-29	555	117.185	437.815	NA	258	106.023	151.977	NA	NA	1.13215	0.552908:2.08853:1:1:1:1	0.478378(0.572973:0.4:0.462162)	NA	NA	NA	NA
A_crys	SYM&DIP	Spe08|Spe47	GMYN	0.538255	3.55271	0.151505	2.41e-17	465	114.085	350.915	NA	226	93.6993	132.301	NA	NA	1.27783	1.13758:2.39833:1:1:1:1	0.535484(0.612903:0.387097:0.606452)	NA	NA	NA	NA
A_crys	DIP&DIP	Spe44|Spe50	GMYN	0.317563	3.54724	0.0895241	3.72e-43	528	113.256	414.744	NA	213	106.967	106.033	NA	NA	1.01033	0.691905:1.63986:1:1:1:1	0.549242(0.602273:0.392045:0.653409)	NA	NA	NA	NA
A_crys	PAU&DIP	Spe10|Spe42	GMYN	0.942682	2.54931	0.369779	6.07e-05	519	130.897	388.103	NA	298	94.8931	203.107	NA	NA	1.34789	1.20305:2.02053:1:1:1:1	0.501927(0.575145:0.427746:0.50289)	NA	NA	NA	NA
A_crys	CHI&DIP	Spe31|Spe49	GMYN	0.60403	3.80294	0.158832	5.08e-25	609	159.269	449.731	NA	321	137.374	183.626	NA	NA	1.44063	1.03677:1.88462:1:1:1:1	0.504926(0.593596:0.431034:0.490148)	NA	NA	NA	NA
A_crys	CHI&DIP	Spe35|Spe50	GMYN	0.593512	3.50862	0.169158	1.48e-21	525	107.572	417.428	NA	263	95.9146	167.085	NA	NA	1.19082	0.625538:2.12241:1:1:1:1	0.568571(0.568571:0.431429:0.705714)	NA	NA	NA	NA
A_crys	CHI&DIP	Spe03|Spe17	GMYN	0.527352	3.58462	0.147115	4.61e-37	534	119.045	414.955	NA	271	116.161	154.839	NA	NA	1.20891	1.01631:1.93536:1:1:1:1	0.524345(0.561798:0.401685:0.609551)	NA	NA	NA	NA
A_crys	CHI&CHI	Spe04|Spe40	GMYN	0.663755	3.59166	0.184805	2.07e-15	516	120.167	395.833	NA	270	99.9881	170.012	NA	NA	1.34561	0.689617:1.66776:1:1:1:1	0.522287(0.581395:0.438953:0.546512)	NA	NA	NA	NA
A_crys	CHI&DIP	Spe34|Spe45	GMYN	0.714497	2.88924	0.247296	5.36e-09	567	138.845	428.155	NA	295	101.923	193.077	NA	NA	1.24704	1.20482:2.22852:1:1:1:1	0.4806(0.550265:0.367725:0.52381)	NA	NA	NA	NA
A_crys	DIP&DIP	Spe42|Spe45	GMYN	0.35615	3.66355	0.0972144	5.68e-24	513	132.256	380.744	NA	209	102.457	106.543	NA	NA	1.20883	1.16306:2.24641:1:1:1:1	0.523392(0.614035:0.385965:0.570175)	NA	NA	NA	NA
A_crys	DIP&DIP	Spe45|Spe46	GMYN	0.487889	3.5848	0.136099	3.29e-32	573	119.072	453.928	NA	271	110.261	160.739	NA	NA	1.13144	1.76198:1.79742:1:1:1:1	0.586387(0.625654:0.405759:0.727749)	NA	NA	NA	NA
A_crys	CHI&DIP	Spe02|Spe16	GMYN	0.763427	3.53784	0.215789	5.63e-13	492	111.846	380.154	NA	271	93.2801	177.72	NA	NA	1.39413	1.26418:1.93036:1:1:1:1	0.444106(0.52439:0.359756:0.448171)	NA	NA	NA	NA
A_crys	DIP&DIP	Spe17|Spe42	GMYN	0.397711	3.56156	0.111668	1.64e-25	528	115.44	412.56	NA	222	96.331	125.669	NA	NA	1.08944	0.939697:1.72905:1:1:1:1	0.571023(0.607955:0.417614:0.6875)	NA	NA	NA	NA
A_crys	DIP&DIP	Spe46|Spe47	GMYN	0.584119	3.47074	0.168298	2.79e-21	507	102.273	404.727	NA	253	91.6291	161.371	NA	NA	1.16641	1.55088:2.72754:1:1:1:1	0.608481(0.642012:0.420118:0.763314)	NA	NA	NA	NA
A_crys	CHI&CHI	Spe03|Spe37	GMYN	0.941497	3.7757	0.249357	4.83e-22	771	153.587	617.413	NA	461	140.44	320.56	NA	NA	1.50608	0.678075:0.94131:1:1:1:1	0.450713(0.535019:0.400778:0.416342)	NA	NA	NA	NA
A_crys	CHI&DIP	Spe39|Spe47	GMYN	0.842864	3.5209	0.239388	3.4e-12	453	109.348	343.652	NA	264	93.4472	170.553	NA	NA	1.48931	1.53761:1.51557:1:1:1:1	0.498896(0.569536:0.36755:0.559603)	NA	NA	NA	NA
A_crys	SYM&SYM	Spe07|Spe52	GMYN	0.791001	3.48807	0.226773	2.41e-09	498	104.664	393.336	NA	273	83.851	189.149	NA	NA	1.35784	1.51029:1.73207:1:1:1:1	0.553213(0.545181:0.415663:0.698795)	NA	NA	NA	NA
A_crys	CHI&DIP	Spe03|Spe43	GMYN	1.00075	3.75531	0.26649	2.17e-06	600	149.468	450.532	NA	354	112.409	241.591	NA	NA	1.68695	1.60016:2.86246:1:1:1:1	0.516667(0.545:0.465:0.54)	NA	NA	NA	NA
A_crys	CHI&DIP	Spe36|Spe42	GMYN	0.300617	3.69847	0.0812816	1.23e-36	546	138.558	407.442	NA	216	116.386	99.6144	NA	NA	1.16289	0.777692:2.32231:1:1:1:1	0.499084(0.598901:0.425824:0.472527)	NA	NA	NA	NA
A_crys	SYM&DIP	Spe08|Spe15	GMYN	0.311315	3.71068	0.083897	1.03e-34	564	140.833	423.167	NA	223	116.337	106.663	NA	NA	1.16015	1.33798:1.86693:1:1:1:1	0.512411(0.609043:0.382979:0.545213)	NA	NA	NA	NA
A_crys	CHI&DIP	Spe01|Spe42	GMYN	0.706772	3.71484	0.190256	4.23e-16	546	141.617	404.383	NA	300	117.798	182.202	NA	NA	1.48698	1.80787:1.56689:1:1:1:1	0.509158(0.593407:0.428571:0.505495)	NA	NA	NA	NA
A_crys	DIP&CHI	Spe13|Spe41	GMYN	0.819689	3.76521	0.2177	6.96e-11	600	151.455	448.545	NA	339	119.189	219.811	NA	NA	1.56321	1.44813:1.23266:1:1:1:1	0.515833(0.59:0.4075:0.55)	NA	NA	NA	NA
A_crys	CHI&DIP	Spe35|Spe42	GMYN	0.578594	3.66613	0.157821	1.42e-17	543	132.711	410.289	NA	270	107.068	162.932	NA	NA	1.3332	1.39752:1.56943:1:1:1:1	0.521179(0.58011:0.39779:0.585635)	NA	NA	NA	NA
A_crys	SYM&DIP	Spe08|Spe13	GMYN	0.606019	3.6181	0.167496	2.13e-17	516	124.479	391.521	NA	263	103.605	159.395	NA	NA	1.33265	0.955954:1.29885:1:1:1:1	0.483527(0.575581:0.372093:0.502907)	NA	NA	NA	NA
A_crys	DIP&DIP	Spe43|Spe46	GMYN	0.591078	3.53378	0.167265	4.82e-26	585	111.242	473.758	NA	294	102.872	191.128	NA	NA	1.15065	2.08882:1.74541:1:1:1:1	0.634188(0.628205:0.489744:0.784615)	NA	NA	NA	NA
A_crys	PAU&DIP	Spe10|Spe17	GMYN	0.83119	3.48183	0.238722	6.41e-16	516	103.797	412.203	NA	297	93.8448	203.155	NA	NA	1.36438	1.13917:1.15407:1:1:1:1	0.534884(0.552326:0.395349:0.656977)	NA	NA	NA	NA
A_crys	SYM&PAU	Spe09|Spe51	GMYN	0.649452	3.43321	0.189167	5.19e-19	510	97.282	412.718	NA	264	87.9797	176.02	NA	NA	1.18045	1.08998:1.94896:1:1:1:1	0.504902(0.5:0.347059:0.667647)	NA	NA	NA	NA
A_crys	SYM&DIP	Spe08|Spe43	GMYN	0.743093	3.68928	0.20142	1.27e-10	549	136.87	412.13	NA	296	105.964	190.036	NA	NA	1.4776	1.40416:2.40114:1:1:1:1	0.556466(0.612022:0.439891:0.617486)	NA	NA	NA	NA
A_crys	DIP&DIP	Spe15|Spe47	GMYN	0.550557	3.87574	0.142052	4.37e-12	462	115.345	346.655	NA	219	86.0161	132.984	NA	NA	1.38074	1.21411:2.23086:1:1:1:1	0.534632(0.62013:0.396104:0.587662)	NA	NA	NA	NA
A_crys	DIP&DIP	Spe16|Spe42	GMYN	0.505184	3.62732	0.139272	2e-20	504	126.019	377.981	NA	241	104.219	136.781	NA	NA	1.28584	1.42898:2.2945:1:1:1:1	0.491071(0.550595:0.395833:0.526786)	NA	NA	NA	NA
A_crys	DIP&DIP	Spe12|Spe45	GMYN	0.350804	3.61712	0.0969842	4.61e-27	522	124.317	397.683	NA	212	101.73	110.27	NA	NA	1.12869	1.32126:1.25376:1:1:1:1	0.522989(0.606322:0.364943:0.597701)	NA	NA	NA	NA
A_crys	CHI&CHI	Spe02|Spe33	GMYN	0.822894	3.61941	0.227356	1.11e-12	558	124.696	433.304	NA	315	103.65	211.35	NA	NA	1.44783	1.09738:1.1297:1:1:1:1	0.453405(0.556452:0.370968:0.432796)	NA	NA	NA	NA
A_crys	CHI&DIP	Spe31|Spe45	GMYN	0.514283	2.13238	0.241178	4.31e-12	534	134.915	399.085	NA	242	95.2928	146.707	NA	NA	0.923094	1.79141:1.69957:1:1:1:1	0.532772(0.598315:0.396067:0.603933)	NA	NA	NA	NA
A_crys	CHI&DIP	Spe03|Spe49	GMYN	0.753007	4.0525	0.185813	3.88e-15	846	222.144	623.856	NA	461	170.122	290.878	NA	NA	1.61939	0.974237:1.46147:1:1:1:1	0.492908(0.615248:0.475177:0.388298)	NA	NA	NA	NA
A_crys	DIP&CHI	Spe12|Spe35	GMYN	0.562272	3.54777	0.158486	1.35e-21	522	113.336	408.664	NA	258	99.0169	158.983	NA	NA	1.21048	1.01948:1.18815:1:1:1:1	0.515326(0.563218:0.367816:0.614943)	NA	NA	NA	NA
A_crys	CHI&CHI	Spe02|Spe38	GMYN	0.653831	3.43885	0.190131	6.18e-19	486	98.0162	387.984	NA	253	88.0803	164.92	NA	NA	1.21551	0.820159:1.29607:1:1:1:1	0.454733(0.546296:0.37037:0.447531)	NA	NA	NA	NA
A_crys	DIP&DIP	Spe17|Spe43	GMYN	0.561356	3.4805	0.161286	4.85e-35	525	103.613	421.387	NA	267	102.785	164.215	NA	NA	1.13747	1.32218:1.71494:1:1:1:1	0.604762(0.614286:0.448571:0.751429)	NA	NA	NA	NA
A_crys	DIP&DIP	Spe13|Spe15	GMYN	0.678409	3.64022	0.186365	7.15e-25	558	128.204	429.796	NA	305	117.638	187.362	NA	NA	1.3589	0.682004:1.11481:1:1:1:1	0.484767(0.583333:0.397849:0.473118)	NA	NA	NA	NA
A_crys	DIP&PAU	Spe16|Spe51	GMYN	0.911899	3.5716	0.25532	1.14e-08	477	116.995	360.005	NA	281	94.2717	186.728	NA	NA	1.56425	1.83458:1.46378:1:1:1:1	0.475891(0.512579:0.339623:0.575472)	NA	NA	NA	NA
A_crys	DIP&DIP	Spe11|Spe13	GMYN	0.630696	3.5731	0.176512	2.33e-15	504	117.23	386.77	NA	258	96.5401	161.46	NA	NA	1.31509	0.911018:0.900757:1:1:1:1	0.482143(0.574405:0.372024:0.5)	NA	NA	NA	NA
A_crys	DIP&CHI	Spe13|Spe36	GMYN	0.680584	3.65886	0.18601	1.26e-17	594	131.43	462.57	NA	314	111.099	202.901	NA	NA	1.33957	0.767549:1.22169:1:1:1:1	0.464646(0.575758:0.424242:0.393939)	NA	NA	NA	NA
A_crys	CHI&DIP	Spe40|Spe44	GMYN	0.638731	3.52589	0.181154	2.78e-16	483	110.078	372.922	NA	250	93.2436	156.756	NA	NA	1.29673	0.662067:1.30246:1:1:1:1	0.493789(0.593168:0.400621:0.487578)	NA	NA	NA	NA
A_crys	DIP&CHI	Spe17|Spe31	GMYN	0.546475	3.56793	0.153163	1.15e-24	555	116.425	438.575	NA	271	103.271	167.729	NA	NA	1.1803	1.80607:2.23294:1:1:1:1	0.576577(0.578378:0.424324:0.727027)	NA	NA	NA	NA
A_crys	DIP&SYM	Spe49|Spe52	GMYN	0.367435	3.76757	0.0975258	1.07e-41	564	151.932	412.068	NA	255	136.652	118.348	NA	NA	1.28337	1.33624:2.35127:1:1:1:1	0.523936(0.62234:0.401596:0.547872)	NA	NA	NA	NA
A_crys	CHI&SYM	Spe04|Spe08	GMYN	0.390934	3.61946	0.108009	1.12e-29	558	124.705	433.295	NA	237	106.997	130.003	NA	NA	1.11246	0.913227:0.827776:1:1:1:1	0.541219(0.604839:0.405914:0.612903)	NA	NA	NA	NA
A_crys	DIP&CHI	Spe11|Spe37	GMYN	0.731227	3.47679	0.210317	1.58e-25	519	103.102	415.898	NA	289	99.9688	189.031	NA	NA	1.27665	0.642723:1.11256:1:1:1:1	0.482659(0.583815:0.352601:0.511561)	NA	NA	NA	NA
A_crys	CHI&DIP	Spe04|Spe14	GMYN	0.362837	3.56069	0.101901	2.4e-31	522	115.306	406.694	NA	216	100.294	115.706	NA	NA	1.06922	1.15149:1.09958:1:1:1:1	0.558429(0.603448:0.408046:0.663793)	NA	NA	NA	NA
A_crys	PAU&DIP	Spe10|Spe13	GMYN	0.895357	3.47645	0.25755	1.01e-06	537	132.385	404.615	NA	303	98.3255	204.674	NA	NA	1.53167	1.73438:2.86478:1:1:1:1	0.452514(0.550279:0.379888:0.427374)	NA	NA	NA	NA
A_crys	SYM&CHI	Spe08|Spe32	GMYN	0.376022	3.67144	0.102418	6.47e-36	567	133.655	433.345	NA	245	118.628	126.372	NA	NA	1.15283	0.824405:1.35739:1:1:1:1	0.4903(0.600529:0.399471:0.470899)	NA	NA	NA	NA
A_crys	DIP&DIP	Spe15|Spe46	GMYN	0.381561	3.4311	0.111207	0	525	97.0088	427.991	NA	235	108.982	126.018	NA	NA	0.945052	0.620692:1.49657:1:1:1:1	0.592381(0.657143:0.4:0.72)	NA	NA	NA	NA
A_crys	PAU&DIP	Spe10|Spe12	GMYN	0.9104	3.63964	0.250135	5.29e-09	534	128.105	405.895	NA	312	102.528	209.472	NA	NA	1.56514	1.25507:1.34139:1:1:1:1	0.501873(0.564607:0.404494:0.536517)	NA	NA	NA	NA
A_crys	SYM&DIP	Spe08|Spe48	GMYN	0.365264	3.70826	0.0985001	2.26e-32	561	140.379	420.621	NA	239	118.753	120.247	NA	NA	1.20178	1.21937:1.52286:1:1:1:1	0.495544(0.609626:0.390374:0.486631)	NA	NA	NA	NA
A_crys	DIP&CHI	Spe11|Spe39	GMYN	0.581978	3.47869	0.167298	2.96e-17	474	103.364	370.636	NA	234	87.2898	146.71	NA	NA	1.21365	0.829548:1.39017:1:1:1:1	0.489451(0.566456:0.373418:0.528481)	NA	NA	NA	NA
A_crys	DIP&SYM	Spe44|Spe52	GMYN	0.298047	3.68149	0.0809583	6.63e-37	549	135.457	413.543	NA	215	114.124	100.876	NA	NA	1.13286	1.54129:1.44566:1:1:1:1	0.532787(0.606557:0.385246:0.606557)	NA	NA	NA	NA
A_crys	SYM&CHI	Spe08|Spe35	GMYN	0.504045	3.59936	0.140037	1.15e-25	534	121.407	412.593	NA	255	106.441	148.559	NA	NA	1.20778	0.837319:1.53235:1:1:1:1	0.511236(0.581461:0.365169:0.587079)	NA	NA	NA	NA
A_crys	CHI&DIP	Spe03|Spe48	GMYN	0.519875	3.68579	0.141048	2.19e-25	606	136.236	469.764	NA	289	116.099	172.901	NA	NA	1.23161	1.06307:2.59178:1:1:1:1	0.468647(0.571782:0.435644:0.398515)	NA	NA	NA	NA
A_crys	SYM&DIP	Spe08|Spe50	GMYN	0.279069	3.55208	0.0785648	8.41e-41	543	113.99	429.01	NA	202	102.982	99.0183	NA	NA	0.966161	1.2313:1.64897:1:1:1:1	0.566298(0.61326:0.395028:0.690608)	NA	NA	NA	NA
A_crys	CHI&DIP	Spe34|Spe43	GMYN	0.997601	3.63781	0.274231	1.04e-15	585	127.794	457.206	NA	359	114.98	244.02	NA	NA	1.57436	0.439448:0.902338:1:1:1:1	0.536752(0.571795:0.464103:0.574359)	NA	NA	NA	NA
A_crys	DIP&DIP	Spe12|Spe44	GMYN	0.344455	3.65319	0.0942889	1.26e-39	543	130.44	412.56	NA	230	117.301	112.699	NA	NA	1.13928	1.15265:1.36039:1:1:1:1	0.503683(0.582873:0.372928:0.555249)	NA	NA	NA	NA
A_crys	CHI&PAU	Spe37|Spe51	GMYN	0.861826	3.49237	0.246774	1.21e-19	585	105.267	479.733	NA	337	98.8087	238.191	NA	NA	1.33517	0.545544:1.38332:1:1:1:1	0.476068(0.512821:0.348718:0.566667)	NA	NA	NA	NA
A_crys	CHI&DIP	Spe04|Spe12	GMYN	0.412897	3.64619	0.113241	5.91e-25	570	129.229	440.771	NA	244	105.625	138.375	NA	NA	1.14594	1.25703:1.15122:1:1:1:1	0.542982(0.581579:0.415789:0.631579)	NA	NA	NA	NA
A_crys	CHI&DIP	Spe41|Spe48	GMYN	0.542517	2.81094	0.193002	8.83e-14	573	144.99	428.01	NA	269	106.18	162.82	NA	NA	1.11651	1.1393:1.65432:1:1:1:1	0.531414(0.63089:0.41623:0.54712)	NA	NA	NA	NA
A_crys	PAU&SYM	Spe51|Spe52	GMYN	0.714928	3.48755	0.204994	1.06e-22	522	104.592	417.408	NA	288	98.9682	189.032	NA	NA	1.27047	1.02295:1.81452:1:1:1:1	0.536398(0.545977:0.376437:0.686782)	NA	NA	NA	NA
A_crys	CHI&CHI	Spe04|Spe34	GMYN	0.766278	3.68807	0.207772	2.1e-13	576	136.651	439.349	NA	318	111.788	206.212	NA	NA	1.45945	1.04898:2.06407:1:1:1:1	0.507812(0.552083:0.411458:0.559896)	NA	NA	NA	NA
A_crys	DIP&DIP	Spe16|Spe47	GMYN	0.662346	3.62587	0.182672	7.15e-11	492	125.775	366.225	NA	253	95.2276	157.772	NA	NA	1.41994	1.49739:2.83425:1:1:1:1	0.50813(0.564024:0.396341:0.564024)	NA	NA	NA	NA
A_crys	DIP&DIP	Spe15|Spe43	GMYN	0.681821	3.64155	0.187233	1.6e-22	534	128.433	405.567	NA	293	115.451	177.549	NA	NA	1.39367	0.935719:2.19697:1:1:1:1	0.558989(0.629213:0.455056:0.592697)	NA	NA	NA	NA
A_crys	CHI&DIP	Spe03|Spe12	GMYN	0.575611	3.6596	0.157288	3.81e-26	555	131.56	423.44	NA	285	117.545	167.455	NA	NA	1.30665	1.13559:1.70709:1:1:1:1	0.475676(0.548649:0.383784:0.494595)	NA	NA	NA	NA
A_crys	CHI&DIP	Spe01|Spe50	GMYN	0.733546	3.63541	0.201778	6.01e-21	567	127.385	439.615	NA	316	114.059	201.941	NA	NA	1.3855	1.44173:1.88039:1:1:1:1	0.553792(0.589947:0.441799:0.62963)	NA	NA	NA	NA
A_crys	CHI&CHI	Spe04|Spe35	GMYN	0.541831	3.58809	0.151008	1.86e-27	555	119.597	435.403	NA	274	108.835	165.165	NA	NA	1.19827	0.944751:1.48307:1:1:1:1	0.528829(0.564865:0.391892:0.62973)	NA	NA	NA	NA
A_crys	CHI&DIP	Spe04|Spe45	GMYN	0.524696	3.64607	0.143907	1.18e-20	534	129.208	404.792	NA	258	107.15	150.85	NA	NA	1.27995	1.4452:1.18105:1:1:1:1	0.543071(0.606742:0.404494:0.617978)	NA	NA	NA	NA
A_crys	CHI&DIP	Spe40|Spe46	GMYN	0.72841	3.60129	0.202264	1.98e-31	573	121.72	451.28	NA	325	119.16	205.84	NA	NA	1.33868	1.04282:1.85873:1:1:1:1	0.576789(0.625654:0.429319:0.675393)	NA	NA	NA	NA
A_crys	DIP&DIP	Spe42|Spe49	GMYN	0.377437	3.71725	0.101537	5.64e-24	537	142.073	394.927	NA	226	110.253	115.747	NA	NA	1.26104	1.1078:1.85513:1:1:1:1	0.494413(0.606145:0.410615:0.46648)	NA	NA	NA	NA
A_crys	SYM&CHI	Spe09|Spe38	GMYN	0.592329	3.51497	0.168516	3.54e-17	510	108.487	401.513	NA	253	91.6474	161.353	NA	NA	1.21403	1.10996:2.13335:1:1:1:1	0.498039(0.529412:0.379412:0.585294)	NA	NA	NA	NA
A_crys	CHI&PAU	Spe41|Spe51	GMYN	0.800489	3.55576	0.225124	6.03e-09	531	114.55	416.45	NA	291	89.5849	201.415	NA	NA	1.39487	1.79175:1.28648:1:1:1:1	0.543315(0.536723:0.381356:0.711864)	NA	NA	NA	NA
A_crys	SYM&CHI	Spe09|Spe36	GMYN	0.570946	3.57189	0.159845	1.24e-32	534	117.04	416.96	NA	276	112.22	163.78	NA	NA	1.22868	0.957786:1.56948:1:1:1:1	0.485019(0.544944:0.396067:0.514045)	NA	NA	NA	NA
A_crys	CHI&CHI	Spe40|Spe41	GMYN	0.694364	3.59107	0.193358	3.68e-10	504	120.073	383.927	NA	262	91.7526	170.247	NA	NA	1.38447	0.885166:1.74241:1:1:1:1	0.534722(0.595238:0.434524:0.574405)	NA	NA	NA	NA
A_crys	DIP&PAU	Spe17|Spe51	GMYN	0.745615	3.41613	0.218263	4.27e-14	516	95.0915	420.908	NA	278	82.9303	195.07	NA	NA	1.23775	1.53505:2.55475:1:1:1:1	0.552326(0.546512:0.366279:0.744186)	NA	NA	NA	NA
A_crys	DIP&DIP	Spe11|Spe15	GMYN	0.292266	3.66082	0.0798362	2.5e-28	555	131.775	423.225	NA	203	101.73	101.27	NA	NA	1.09207	0.96164:1.9009:1:1:1:1	0.509009(0.605405:0.381081:0.540541)	NA	NA	NA	NA
A_crys	SYM&CHI	Spe08|Spe38	GMYN	0.273963	3.61067	0.0758759	3.17e-49	537	123.251	413.749	NA	210	115.993	94.0066	NA	NA	1.0398	0.872055:1.41414:1:1:1:1	0.499069(0.578212:0.382682:0.536313)	NA	NA	NA	NA
A_crys	DIP&DIP	Spe13|Spe46	GMYN	0.749916	3.71788	0.201705	2.45e-37	630	142.191	487.809	NA	367	140.555	226.445	NA	NA	1.41979	0.769012:1.74602:1:1:1:1	0.547619(0.592857:0.430952:0.619048)	NA	NA	NA	NA
A_crys	CHI&DIP	Spe40|Spe48	GMYN	0.697327	3.55183	0.196329	1.38e-13	528	113.952	414.048	NA	277	93.2853	183.715	NA	NA	1.31338	0.83804:1.28899:1:1:1:1	0.487689(0.596591:0.417614:0.448864)	NA	NA	NA	NA
A_crys	PAU&DIP	Spe10|Spe15	GMYN	0.94025	3.59596	0.261474	1.4e-10	540	120.858	419.142	NA	319	100.49	218.51	NA	NA	1.53463	0.966664:1.46738:1:1:1:1	0.493519(0.569444:0.405556:0.505556)	NA	NA	NA	NA
A_crys	CHI&CHI	Spe02|Spe03	GMYN	0.958522	3.49885	0.273954	2.2e-15	528	106.179	421.821	NA	315	96.7753	218.225	NA	NA	1.46937	0.923697:2.3328:1:1:1:1	0.429924(0.511364:0.372159:0.40625)	NA	NA	NA	NA
A_crys	PAU&PAU	Spe10|Spe51	GMYN	1.04404	3.50887	0.297542	2.84e-15	513	107.608	405.392	NA	322	99.8347	222.165	NA	NA	1.56107	0.880269:1.29141:1:1:1:1	0.481481(0.497076:0.383041:0.564327)	NA	NA	NA	NA
A_crys	SYM&DIP	Spe09|Spe14	GMYN	0.618328	3.44946	0.179254	3.84e-16	501	99.4126	401.587	NA	251	84.8183	166.182	NA	NA	1.1801	0.918573:1.41035:1:1:1:1	0.53493(0.571856:0.371257:0.661677)	NA	NA	NA	NA
A_crys	SYM&DIP	Spe08|Spe14	GMYN	0.276312	3.6135	0.0764665	8.09e-39	522	123.718	398.282	NA	199	107.878	91.1222	NA	NA	1.06725	1.15293:1.95633:1:1:1:1	0.532567(0.606322:0.376437:0.614943)	NA	NA	NA	NA
A_crys	CHI&CHI	Spe34|Spe35	GMYN	0.836673	3.65559	0.228875	3.13e-13	630	130.859	499.141	NA	352	108.216	243.784	NA	NA	1.4222	0.544609:1.51296:1:1:1:1	0.47619(0.533333:0.364286:0.530952)	NA	NA	NA	NA
A_crys	DIP&CHI	Spe13|Spe31	GMYN	0.609605	3.72167	0.163799	3.3e-20	597	142.911	454.089	NA	305	119.425	185.575	NA	NA	1.35458	0.787631:1.23839:1:1:1:1	0.494137(0.567839:0.424623:0.48995)	NA	NA	NA	NA
A_crys	CHI&DIP	Spe01|Spe13	GMYN	0.906374	3.75566	0.241336	6.24e-10	669	149.538	519.462	NA	386	118.418	267.582	NA	NA	1.54326	1.31483:1.24458:1:1:1:1	0.455904(0.53139:0.387892:0.44843)	NA	NA	NA	NA
A_crys	DIP&CHI	Spe11|Spe40	GMYN	0.630488	3.49222	0.180541	5.99e-18	471	105.245	365.755	NA	244	91.7125	152.288	NA	NA	1.26994	0.613191:1.19894:1:1:1:1	0.502123(0.592357:0.398089:0.515924)	NA	NA	NA	NA
A_crys	CHI&CHI	Spe01|Spe04	GMYN	0.862474	3.73475	0.230933	1.91e-14	621	145.425	475.575	NA	360	122.191	237.809	NA	NA	1.5351	0.941817:1.12543:1:1:1:1	0.52657(0.572464:0.458937:0.548309)	NA	NA	NA	NA
A_crys	CHI&DIP	Spe38|Spe47	GMYN	0.615814	1.79742	0.34261	4.2e-07	471	110.609	360.391	NA	222	75.4049	146.595	NA	NA	0.8933	0.622911:3.44968:1:1:1:1	0.52017(0.595541:0.394904:0.570064)	NA	NA	NA	NA
A_crys	CHI&CHI	Spe01|Spe36	GMYN	0.674249	3.61182	0.186678	6.85e-21	561	123.441	437.559	NA	301	109.809	191.191	NA	NA	1.32063	1.0632:1.08973:1:1:1:1	0.469697(0.55615:0.446524:0.406417)	NA	NA	NA	NA
A_crys	CHI&DIP	Spe37|Spe49	GMYN	0.952995	3.85103	0.247465	7.3e-11	717	169.816	547.184	NA	424	135.571	288.429	NA	NA	1.63937	0.976828:1.20216:1:1:1:1	0.481172(0.610879:0.433054:0.399582)	NA	NA	NA	NA
A_crys	DIP&DIP	Spe16|Spe49	GMYN	0.531542	3.67268	0.144729	2.18e-29	582	133.875	448.125	NA	289	120.814	168.186	NA	NA	1.25408	1.10759:1.63222:1:1:1:1	0.452749(0.551546:0.378866:0.427835)	NA	NA	NA	NA
A_crys	CHI&DIP	Spe05|Spe12	GMYN	0.59245	2.92301	0.202685	3.62e-11	534	127.014	406.986	NA	257	93.3268	163.673	NA	NA	1.14678	1.23624:1.80909:1:1:1:1	0.496255(0.570225:0.379213:0.539326)	NA	NA	NA	NA
A_crys	DIP&CHI	Spe15|Spe37	GMYN	0.720519	3.43976	0.209468	9.09e-21	546	98.1349	447.865	NA	292	91.2427	200.757	NA	NA	1.20926	0.226318:0.914353:1:1:1:1	0.486264(0.585165:0.384615:0.489011)	NA	NA	NA	NA
A_crys	CHI&CHI	Spe04|Spe39	GMYN	0.73397	3.55133	0.206674	4.47e-14	519	113.876	405.124	NA	281	95.7804	185.22	NA	NA	1.35214	0.784702:1.6098:1:1:1:1	0.515414(0.540462:0.424855:0.580925)	NA	NA	NA	NA
A_crys	CHI&PAU	Spe38|Spe51	GMYN	0.747163	3.54133	0.210984	8.13e-13	507	112.367	394.633	NA	277	93.5761	183.424	NA	NA	1.36644	1.22884:1.49149:1:1:1:1	0.504931(0.54142:0.37574:0.597633)	NA	NA	NA	NA
A_crys	DIP&CHI	Spe13|Spe32	GMYN	0.685624	3.65604	0.187532	3.02e-18	594	130.938	463.062	NA	315	111.014	203.986	NA	NA	1.34041	0.748059:1.21493:1:1:1:1	0.463805(0.573232:0.424242:0.393939)	NA	NA	NA	NA
A_crys	CHI&SYM	Spe05|Spe52	GMYN	0.558192	3.6304	0.153755	3.37e-18	546	126.538	419.462	NA	266	103.268	162.732	NA	NA	1.27019	1.06957:1.53868:1:1:1:1	0.518315(0.57967:0.395604:0.57967)	NA	NA	NA	NA
A_crys	DIP&CHI	Spe13|Spe35	GMYN	0.644767	3.62282	0.177974	1.3e-19	552	125.265	426.735	NA	289	108.346	180.654	NA	NA	1.32057	0.800614:1.43809:1:1:1:1	0.476449(0.529891:0.383152:0.516304)	NA	NA	NA	NA
A_crys	SYM&CHI	Spe07|Spe31	GMYN	0.668273	3.53962	0.188798	2.59e-18	528	112.112	415.888	NA	278	98.1628	179.837	NA	NA	1.27796	0.683802:1.47241:1:1:1:1	0.535038(0.514205:0.451705:0.639205)	NA	NA	NA	NA
A_crys	CHI&CHI	Spe34|Spe40	GMYN	0.958144	3.54222	0.270492	4.94e-15	588	112.501	475.499	NA	347	100.492	246.508	NA	NA	1.45255	0.27272:0.935753:1:1:1:1	0.481293(0.545918:0.415816:0.482143)	NA	NA	NA	NA
A_crys	SYM&CHI	Spe08|Spe33	GMYN	0.460886	3.56992	0.129102	0	522	116.734	405.266	NA	256	118.522	137.478	NA	NA	1.15616	0.848682:0.958012:1:1:1:1	0.499042(0.600575:0.364943:0.531609)	NA	NA	NA	NA
A_crys	DIP&PAU	Spe46|Spe51	GMYN	0.82329	3.38735	0.243048	4.08e-16	522	91.5116	430.488	NA	295	84.1474	210.853	NA	NA	1.27279	1.16509:2.06048:1:1:1:1	0.581418(0.597701:0.376437:0.770115)	NA	NA	NA	NA
A_crys	DIP&CHI	Spe12|Spe32	GMYN	0.305635	3.67252	0.083222	1.15e-40	567	133.847	433.153	NA	225	117.483	107.517	NA	NA	1.10043	0.85063:1.40531:1:1:1:1	0.5(0.587302:0.410053:0.502646)	NA	NA	NA	NA
A_crys	DIP&CHI	Spe13|Spe34	GMYN	0.759478	3.62748	0.209368	6.38e-22	642	126.044	515.956	NA	354	114.662	239.338	NA	NA	1.32255	0.379508:1.05129:1:1:1:1	0.454829(0.535047:0.383178:0.446262)	NA	NA	NA	NA
A_crys	CHI&DIP	Spe40|Spe42	GMYN	0.828987	3.67688	0.225459	2.22e-08	528	134.628	393.372	NA	295	102.383	192.617	NA	NA	1.55513	1.35215:1.97969:1:1:1:1	0.511364(0.588068:0.428977:0.517045)	NA	NA	NA	NA
A_crys	SYM&DIP	Spe09|Spe49	GMYN	0.66866	3.57818	0.186872	1.02e-29	546	118.026	427.974	NA	299	113.567	185.433	NA	NA	1.29759	0.754771:1.70708:1:1:1:1	0.482601(0.56044:0.381868:0.505495)	NA	NA	NA	NA
A_crys	DIP&DIP	Spe14|Spe47	GMYN	0.520854	1.54841	0.336379	9.47e-08	465	110.737	354.263	NA	203	72.5154	130.485	NA	NA	0.765562	1.47325:2.93077:1:1:1:1	0.567742(0.635484:0.406452:0.66129)	NA	NA	NA	NA
A_crys	CHI&CHI	Spe01|Spe03	GMYN	0.887616	3.69586	0.240165	2.11e-28	684	138.078	545.922	NA	410	133.601	276.399	NA	NA	1.45451	0.750587:0.806935:1:1:1:1	0.465643(0.524123:0.429825:0.442982)	NA	NA	NA	NA
A_crys	DIP&DIP	Spe11|Spe42	GMYN	0.293899	3.68735	0.0797045	1.38e-28	534	136.519	397.481	NA	201	105.28	95.7203	NA	NA	1.16145	1.14327:1.85168:1:1:1:1	0.515918(0.601124:0.38764:0.558989)	NA	NA	NA	NA
A_crys	CHI&CHI	Spe35|Spe39	GMYN	0.830769	3.6342	0.228597	4.97e-21	594	127.18	466.82	NA	344	116.94	227.06	NA	NA	1.43101	0.688012:1.43551:1:1:1:1	0.490741(0.530303:0.396465:0.545455)	NA	NA	NA	NA
A_crys	DIP&DIP	Spe47|Spe49	GMYN	0.625455	3.64568	0.171561	3.04e-16	495	129.141	365.859	NA	258	106.092	151.908	NA	NA	1.4134	1.13935:2.88309:1:1:1:1	0.517172(0.648485:0.393939:0.509091)	NA	NA	NA	NA
A_crys	PAU&DIP	Spe10|Spe16	GMYN	0.76919	3.37938	0.227613	1.35e-20	471	90.5439	380.456	NA	265	86.9416	178.058	NA	NA	1.27097	0.540089:1.29013:1:1:1:1	0.454352(0.515924:0.39172:0.455414)	NA	NA	NA	NA
A_crys	CHI&CHI	Spe05|Spe35	GMYN	0.208957	2.54533	0.0820943	1.22e-16	564	137.3	426.7	NA	154	76.7707	77.2293	NA	NA	0.777725	1.87534:1.47755:1:1:1:1	0.471631(0.571809:0.345745:0.49734)	NA	NA	NA	NA
A_crys	PAU&CHI	Spe10|Spe41	GMYN	1.10767	3.7812	0.292941	1.79e-05	627	154.717	472.283	NA	381	116.167	264.833	NA	NA	1.76738	0.789029:1.66353:1:1:1:1	0.527911(0.595694:0.442584:0.545455)	NA	NA	NA	NA
A_crys	DIP&CHI	Spe12|Spe38	GMYN	0.372573	3.63727	0.102432	3.72e-33	552	127.702	424.298	NA	235	111.93	123.07	NA	NA	1.12784	0.935815:1.51169:1:1:1:1	0.507246(0.57337:0.394022:0.554348)	NA	NA	NA	NA
A_crys	SYM&DIP	Spe07|Spe43	GMYN	0.730006	3.4543	0.211333	2.51e-24	486	100.056	385.944	NA	273	96.8532	176.147	NA	NA	1.29087	0.989758:2.02904:1:1:1:1	0.584362(0.546296:0.503086:0.703704)	NA	NA	NA	NA
A_crys	CHI&SYM	Spe01|Spe07	GMYN	1.0474	3.26541	0.320756	1.13e-05	672	156.853	515.147	NA	399	116.127	282.873	NA	NA	1.56511	1.47488:2.03015:1:1:1:1	0.49628(0.502232:0.401786:0.584821)	NA	NA	NA	NA
A_crys	PAU&DIP	Spe10|Spe48	GMYN	0.860044	3.67223	0.234202	2.93e-08	570	133.794	436.206	NA	321	102.593	218.407	NA	NA	1.52014	1.27002:1.70307:1:1:1:1	0.475439(0.581579:0.418421:0.426316)	NA	NA	NA	NA
A_crys	CHI&DIP	Spe03|Spe42	GMYN	0.434391	3.6065	0.120447	6.1e-34	540	122.568	417.432	NA	248	112.395	135.605	NA	NA	1.15439	0.637414:1.41521:1:1:1:1	0.481481(0.561111:0.408333:0.475)	NA	NA	NA	NA
A_crys	PAU&DIP	Spe10|Spe50	GMYN	0.824097	3.45206	0.238726	6.28e-27	510	99.7576	410.242	NA	299	99.0867	199.913	NA	NA	1.33813	0.694178:1.38488:1:1:1:1	0.544118(0.564706:0.429412:0.638235)	NA	NA	NA	NA
A_crys	DIP&DIP	Spe42|Spe48	GMYN	0.349861	3.71194	0.0942527	4.85e-28	549	141.07	407.93	NA	225	112.558	112.442	NA	NA	1.21378	0.886165:2.36833:1:1:1:1	0.504554(0.606557:0.420765:0.486339)	NA	NA	NA	NA
A_crys	DIP&DIP	Spe13|Spe16	GMYN	0.763136	3.66217	0.208383	4.87e-16	573	132.013	440.987	NA	320	112.519	207.481	NA	NA	1.43104	1.22517:1.83687:1:1:1:1	0.441536(0.5:0.374346:0.450262)	NA	NA	NA	NA
A_crys	DIP&DIP	Spe12|Spe49	GMYN	0.347476	3.62627	0.0958221	1.53e-37	540	125.841	414.159	NA	226	112.748	113.252	NA	NA	1.11156	0.538154:1.85522:1:1:1:1	0.497222(0.597222:0.388889:0.505556)	NA	NA	NA	NA
A_crys	CHI&CHI	Spe34|Spe36	GMYN	0.642796	3.54379	0.181387	1.1e-18	540	112.736	427.264	NA	277	97.2755	179.725	NA	NA	1.24844	0.538796:1.83668:1:1:1:1	0.456481(0.544444:0.394444:0.430556)	NA	NA	NA	NA
A_crys	DIP&CHI	Spe14|Spe35	GMYN	0.477444	3.59043	0.132977	5.54e-20	513	119.97	393.03	NA	234	97.1062	136.894	NA	NA	1.20545	1.50197:2.09658:1:1:1:1	0.538986(0.587719:0.383041:0.646199)	NA	NA	NA	NA
A_crys	CHI&CHI	Spe32|Spe39	GMYN	0.657294	3.53967	0.185693	7.48e-16	513	112.119	400.881	NA	266	94.4416	171.558	NA	NA	1.28726	1.07884:1.22437:1:1:1:1	0.465887(0.561404:0.418129:0.418129)	NA	NA	NA	NA
A_crys	CHI&PAU	Spe33|Spe51	GMYN	0.883478	3.6197	0.244075	6.84e-10	552	124.744	427.256	NA	316	100.256	215.744	NA	NA	1.50182	0.820017:2.17157:1:1:1:1	0.495471(0.532609:0.372283:0.581522)	NA	NA	NA	NA
A_crys	DIP&DIP	Spe16|Spe44	GMYN	0.512251	1.88192	0.272197	1.2e-10	495	130.634	364.366	NA	223	90.0072	132.993	NA	NA	0.873717	2.18502:2.89833:1:1:1:1	0.469697(0.551515:0.360606:0.49697)	NA	NA	NA	NA
A_crys	SYM&CHI	Spe09|Spe33	GMYN	0.650378	3.50802	0.185397	2.42e-21	516	107.486	408.514	NA	272	97.4664	174.534	NA	NA	1.24564	1.01821:1.06863:1:1:1:1	0.478682(0.520349:0.366279:0.549419)	NA	NA	NA	NA
A_crys	CHI&CHI	Spe05|Spe40	GMYN	0.821704	3.58236	0.229375	6.1e-10	528	118.687	409.313	NA	294	94.5284	199.472	NA	NA	1.44226	1.11139:1.46093:1:1:1:1	0.479167(0.556818:0.414773:0.465909)	NA	NA	NA	NA
A_crys	CHI&DIP	Spe03|Spe46	GMYN	0.578434	3.58891	0.161173	1.27e-30	555	119.726	435.274	NA	286	113.098	172.902	NA	NA	1.22786	1.06194:2.01193:1:1:1:1	0.552252(0.605405:0.402703:0.648649)	NA	NA	NA	NA
A_crys	CHI&SYM	Spe04|Spe09	GMYN	0.609441	3.44507	0.176903	7e-34	513	98.832	414.168	NA	268	98.7289	169.271	NA	NA	1.15574	0.614833:1.42686:1:1:1:1	0.535088(0.555556:0.397661:0.652047)	NA	NA	NA	NA
A_crys	SYM&DIP	Spe08|Spe12	GMYN	0.318688	3.645	0.0874314	6.83e-31	549	129.024	419.976	NA	213	105.468	107.532	NA	NA	1.10043	0.963887:1.69059:1:1:1:1	0.514572(0.587432:0.377049:0.579235)	NA	NA	NA	NA
A_crys	CHI&DIP	Spe33|Spe49	GMYN	0.651587	3.78498	0.172151	1.58e-18	645	155.5	489.5	NA	336	127.231	208.769	NA	NA	1.407	1.19225:1.92309:1:1:1:1	0.468217(0.572093:0.393023:0.439535)	NA	NA	NA	NA
A_crys	DIP&DIP	Spe15|Spe16	GMYN	0.479992	3.6238	0.132455	4.16e-17	501	125.428	375.572	NA	228	97.096	130.904	NA	NA	1.26706	1.87951:2.70689:1:1:1:1	0.479042(0.556886:0.371257:0.508982)	NA	NA	NA	NA
A_crys	SYM&CHI	Spe07|Spe34	GMYN	0.950477	3.68751	0.257756	1.15e-11	585	136.549	448.451	NA	349	114.104	234.896	NA	NA	1.58935	1.03557:2.25821:1:1:1:1	0.487179(0.487179:0.402564:0.571795)	NA	NA	NA	NA
A_crys	DIP&DIP	Spe17|Spe49	GMYN	0.44712	3.61989	0.123517	4.66e-45	534	124.776	409.224	NA	258	122.02	135.98	NA	NA	1.18848	0.947139:1.2856:1:1:1:1	0.53839(0.61236:0.401685:0.601124)	NA	NA	NA	NA
A_crys	CHI&DIP	Spe05|Spe16	GMYN	0.689757	3.50061	0.197039	3.9e-23	534	106.429	427.571	NA	287	99.3621	187.638	NA	NA	1.24998	0.517155:1.66864:1:1:1:1	0.455056(0.52809:0.379213:0.457865)	NA	NA	NA	NA
A_crys	DIP&DIP	Spe15|Spe44	GMYN	0.289551	2.02125	0.143254	7.27e-23	552	140.213	411.787	NA	196	98.0567	97.9433	NA	NA	0.729417	1.33144:2.11552:1:1:1:1	0.498188(0.600543:0.388587:0.505435)	NA	NA	NA	NA
A_crys	CHI&CHI	Spe04|Spe41	GMYN	0.387049	3.72555	0.10389	1.04e-25	582	143.653	438.347	NA	245	113.82	131.18	NA	NA	1.21108	1.37388:1.16397:1:1:1:1	0.579897(0.615979:0.453608:0.670103)	NA	NA	NA	NA
A_crys	CHI&DIP	Spe32|Spe46	GMYN	0.405109	3.55763	0.11387	0	525	114.837	410.163	NA	242	115.423	126.577	NA	NA	1.09468	0.728267:1.46073:1:1:1:1	0.567619(0.648571:0.417143:0.637143)	NA	NA	NA	NA
A_crys	CHI&CHI	Spe38|Spe40	GMYN	0.721443	3.6006	0.200367	6.93e-14	507	121.608	385.392	NA	275	100.714	174.286	NA	NA	1.41203	1.06147:2.27735:1:1:1:1	0.499014(0.579882:0.428994:0.488166)	NA	NA	NA	NA
A_crys	SYM&DIP	Spe07|Spe15	GMYN	0.70121	3.51393	0.199552	5.92e-13	474	108.336	365.664	NA	253	89.8326	163.167	NA	NA	1.34408	1.29149:1.73044:1:1:1:1	0.529536(0.591772:0.379747:0.617089)	NA	NA	NA	NA
A_crys	PAU&CHI	Spe10|Spe34	GMYN	0.881042	3.59088	0.245355	1.01e-08	483	120.042	362.958	NA	279	95.6387	183.361	NA	NA	1.55453	1.44926:2.16395:1:1:1:1	0.461698(0.531056:0.391304:0.462733)	NA	NA	NA	NA
A_crys	DIP&DIP	Spe11|Spe43	GMYN	0.694772	3.67807	0.188896	7.71e-11	516	134.84	381.16	NA	273	103.182	169.818	NA	NA	1.47436	1.46344:2.31133:1:1:1:1	0.553295(0.610465:0.450581:0.598837)	NA	NA	NA	NA
A_crys	SYM&CHI	Spe07|Spe33	GMYN	0.845257	3.69631	0.228676	7.43e-21	618	138.161	479.839	NA	362	125.513	236.487	NA	NA	1.48264	0.615989:1.24929:1:1:1:1	0.503236(0.514563:0.427184:0.567961)	NA	NA	NA	NA
A_crys	CHI&DIP	Spe33|Spe47	GMYN	0.793096	2.67028	0.297008	6.84e-07	519	126.006	392.994	NA	280	91.8177	188.182	NA	NA	1.24885	1.02143:1.68846:1:1:1:1	0.514451(0.589595:0.390173:0.563584)	NA	NA	NA	NA
A_crys	CHI&PAU	Spe36|Spe51	GMYN	0.757511	3.56393	0.212549	1.46e-12	504	115.805	388.195	NA	276	95.0002	181	NA	NA	1.40235	0.859615:1.94266:1:1:1:1	0.492063(0.553571:0.383929:0.53869)	NA	NA	NA	NA
A_crys	CHI&DIP	Spe40|Spe49	GMYN	0.700592	3.63988	0.192477	9.74e-14	549	128.146	420.854	NA	290	103.546	186.454	NA	NA	1.38667	0.928075:2.0967:1:1:1:1	0.485428(0.606557:0.415301:0.434426)	NA	NA	NA	NA
A_crys	DIP&DIP	Spe13|Spe48	GMYN	0.704669	3.72745	0.189049	2.65e-15	606	144.016	461.984	NA	324	117.1	206.9	NA	NA	1.42303	1.10043:1.74211:1:1:1:1	0.469472(0.594059:0.415842:0.398515)	NA	NA	NA	NA
A_crys	DIP&CHI	Spe17|Spe34	GMYN	0.68455	3.51708	0.194636	1.04e-42	540	108.793	431.207	NA	302	112.386	189.614	NA	NA	1.25522	0.858094:1.79018:1:1:1:1	0.525(0.55:0.369444:0.655556)	NA	NA	NA	NA
A_crys	PAU&CHI	Spe10|Spe40	GMYN	0.790263	3.46207	0.228263	1.28e-11	441	101.098	339.902	NA	245	84.716	160.284	NA	NA	1.40277	1.12581:2.58715:1:1:1:1	0.485261(0.557823:0.442177:0.455782)	NA	NA	NA	NA
A_crys	CHI&CHI	Spe04|Spe36	GMYN	0.436676	3.71817	0.117444	3.26e-35	582	142.246	439.754	NA	271	127.334	143.666	NA	NA	1.2387	1.02437:1.40993:1:1:1:1	0.514605(0.587629:0.445876:0.510309)	NA	NA	NA	NA
A_crys	DIP&DIP	Spe46|Spe48	GMYN	0.472166	3.61771	0.130515	6.3e-35	558	124.413	433.587	NA	266	116.168	149.832	NA	NA	1.1735	0.98513:1.4585:1:1:1:1	0.566308(0.639785:0.424731:0.634409)	NA	NA	NA	NA
A_crys	CHI&DIP	Spe02|Spe50	GMYN	0.693632	3.54952	0.195416	4.36e-32	513	113.601	399.399	NA	290	112.652	177.348	NA	NA	1.32605	1.35852:1.59956:1:1:1:1	0.517544(0.55848:0.388889:0.605263)	NA	NA	NA	NA
A_crys	CHI&CHI	Spe05|Spe33	GMYN	0.306442	2.39497	0.127952	1.16e-21	549	126.104	422.896	NA	196	90.697	105.303	NA	NA	0.786173	1.20938:1.36268:1:1:1:1	0.469035(0.562842:0.379781:0.464481)	NA	NA	NA	NA
A_crys	PAU&DIP	Spe10|Spe46	GMYN	0.831819	3.53002	0.235641	5.57e-14	504	110.686	393.314	NA	291	96.5954	194.405	NA	NA	1.42438	1.37717:1.56968:1:1:1:1	0.565476(0.604167:0.422619:0.669643)	NA	NA	NA	NA
A_crys	DIP&CHI	Spe16|Spe33	GMYN	0.649914	3.63025	0.179027	1.62e-18	564	126.512	437.488	NA	293	107.018	185.982	NA	NA	1.31844	0.979614:2.06611:1:1:1:1	0.458333(0.518617:0.369681:0.486702)	NA	NA	NA	NA
A_crys	CHI&CHI	Spe03|Spe05	GMYN	0.588171	3.48455	0.168794	0	555	104.174	450.826	NA	290	110.656	179.344	NA	NA	1.13182	0.528511:1.49871:1:1:1:1	0.436036(0.516216:0.375676:0.416216)	NA	NA	NA	NA
A_crys	SYM&CHI	Spe07|Spe37	GMYN	0.868419	3.68218	0.235844	3.41e-18	609	135.581	473.419	NA	360	121.383	238.617	NA	NA	1.49484	1.18514:1.53716:1:1:1:1	0.49179(0.507389:0.394089:0.573892)	NA	NA	NA	NA
A_crys	CHI&SYM	Spe01|Spe52	GMYN	0.783886	3.65552	0.214439	1.44e-17	561	130.847	430.153	NA	320	114.441	205.559	NA	NA	1.45366	1.35224:0.947565:1:1:1:1	0.525847(0.585561:0.411765:0.580214)	NA	NA	NA	NA
A_crys	DIP&CHI	Spe15|Spe31	GMYN	0.431868	3.7335	0.115674	9.46e-20	573	145.184	427.816	NA	248	109.06	138.94	NA	NA	1.26842	1.62033:1.34763:1:1:1:1	0.529668(0.594241:0.424084:0.570681)	NA	NA	NA	NA
A_crys	CHI&DIP	Spe02|Spe14	GMYN	0.664754	3.50183	0.18983	3.17e-19	483	106.603	376.397	NA	258	95.5243	162.476	NA	NA	1.29093	0.838541:1.51827:1:1:1:1	0.493789(0.57764:0.363354:0.540373)	NA	NA	NA	NA
A_crys	CHI&DIP	Spe01|Spe17	GMYN	0.823499	3.54681	0.23218	2.14e-23	555	113.192	441.808	NA	325	108.306	216.694	NA	NA	1.37892	1.25446:1.16411:1:1:1:1	0.537838(0.564865:0.397297:0.651351)	NA	NA	NA	NA
A_crys	CHI&CHI	Spe03|Spe34	GMYN	0.742317	3.63887	0.203997	2.39e-10	573	127.974	445.026	NA	303	98.6589	204.341	NA	NA	1.38923	1.01064:2.02593:1:1:1:1	0.440663(0.518325:0.361257:0.442408)	NA	NA	NA	NA
A_crys	CHI&CHI	Spe05|Spe32	GMYN	0.600661	3.56086	0.168684	8.64e-21	531	115.333	415.667	NA	268	100.732	167.268	NA	NA	1.24361	0.57414:2.37222:1:1:1:1	0.462335(0.573446:0.412429:0.40113)	NA	NA	NA	NA
A_crys	SYM&DIP	Spe07|Spe49	GMYN	0.664454	1.89748	0.350177	2.13e-07	519	139.942	379.058	NA	261	96.5954	164.405	NA	NA	0.996924	1.95608:2.07356:1:1:1:1	0.496146(0.552023:0.424855:0.511561)	NA	NA	NA	NA
A_crys	DIP&CHI	Spe13|Spe39	GMYN	0.780612	3.72723	0.209435	2.09e-13	606	143.975	462.025	NA	335	116.319	218.681	NA	NA	1.48068	1.23645:1.64965:1:1:1:1	0.462046(0.529703:0.413366:0.443069)	NA	NA	NA	NA
A_crys	DIP&DIP	Spe12|Spe46	GMYN	0.397577	3.37886	0.117666	0	528	90.4812	437.519	NA	226	93.0947	132.905	NA	NA	0.908467	0.626887:1.05572:1:1:1:1	0.597538(0.644886:0.383523:0.764205)	NA	NA	NA	NA
A_crys	CHI&CHI	Spe32|Spe36	GMYN	0.00219564	NA	NA	NA	609	152.761	456.239	NA	1	NA	1	NA	NA	0.00164489	2:2:1:1:1:1	0.475369(0.598522:0.448276:0.37931)	NA	NA	NA	NA
A_crys	CHI&DIP	Spe02|Spe42	GMYN	0.724692	3.54291	0.204547	1.65e-12	480	112.605	367.395	NA	258	92.1287	165.871	NA	NA	1.38583	1.0958:2.05264:1:1:1:1	0.475(0.571875:0.3625:0.490625)	NA	NA	NA	NA
A_crys	DIP&SYM	Spe12|Spe52	GMYN	0.337757	3.61029	0.093554	4.99e-35	555	123.189	431.811	NA	224	107.675	116.325	NA	NA	1.06413	1.37675:1.26323:1:1:1:1	0.55045(0.605405:0.386486:0.659459)	NA	NA	NA	NA
A_crys	DIP&CHI	Spe17|Spe35	GMYN	0.478338	3.45868	0.138301	9.31e-32	528	100.642	427.358	NA	244	95.1564	148.844	NA	NA	1.04642	1.19517:2.01567:1:1:1:1	0.549242(0.559659:0.363636:0.724432)	NA	NA	NA	NA
A_crys	CHI&DIP	Spe05|Spe50	GMYN	0.567661	3.5208	0.161231	5.16e-35	531	109.333	421.667	NA	272	107.697	164.303	NA	NA	1.17572	0.624575:1.84748:1:1:1:1	0.532015(0.581921:0.40113:0.612994)	NA	NA	NA	NA
A_crys	CHI&PAU	Spe40|Spe51	GMYN	0.795563	3.61634	0.219991	1.01e-17	567	124.187	442.813	NA	321	109.961	211.039	NA	NA	1.41339	0.815128:2.01976:1:1:1:1	0.500882(0.531746:0.399471:0.571429)	NA	NA	NA	NA
A_crys	DIP&CHI	Spe15|Spe39	GMYN	0.698769	3.56307	0.196114	7.54e-11	492	115.672	376.328	NA	258	90.4894	167.511	NA	NA	1.37218	1.47103:1.43755:1:1:1:1	0.472561(0.557927:0.362805:0.496951)	NA	NA	NA	NA
A_crys	DIP&CHI	Spe14|Spe40	GMYN	0.705053	3.55345	0.198414	7.25e-19	510	114.198	395.802	NA	277	101.451	175.549	NA	NA	1.34286	0.433758:1.63599:1:1:1:1	0.534314(0.611765:0.420588:0.570588)	NA	NA	NA	NA
A_crys	SYM&DIP	Spe09|Spe44	GMYN	0.605053	3.53437	0.171191	1.97e-22	495	111.33	383.67	NA	257	100.551	156.449	NA	NA	1.26388	1.17907:2.20852:1:1:1:1	0.491919(0.536364:0.369697:0.569697)	NA	NA	NA	NA
A_crys	CHI&DIP	Spe37|Spe48	GMYN	0.748271	3.62038	0.206683	5.5e-16	555	124.857	430.143	NA	306	106.543	199.457	NA	NA	1.3944	1.30076:1.38721:1:1:1:1	0.464865(0.597297:0.386486:0.410811)	NA	NA	NA	NA
A_crys	DIP&DIP	Spe11|Spe50	GMYN	0.32266	3.48573	0.0925659	1.72e-32	531	104.339	426.661	NA	202	91.6151	110.385	NA	NA	0.944189	0.567102:1.58274:1:1:1:1	0.559322(0.60452:0.387006:0.686441)	NA	NA	NA	NA
A_crys	SYM&DIP	Spe07|Spe48	GMYN	0.541783	3.52655	0.15363	2.97e-18	471	110.175	360.825	NA	230	92.866	137.134	NA	NA	1.23997	1.14878:1.09569:1:1:1:1	0.516985(0.566879:0.417197:0.566879)	NA	NA	NA	NA
A_crys	CHI&DIP	Spe40|Spe47	GMYN	0.869481	3.59411	0.241919	3.1e-07	498	120.559	377.441	NA	280	91.4845	188.515	NA	NA	1.52908	1.2562:2.69073:1:1:1:1	0.533133(0.608434:0.421687:0.569277)	NA	NA	NA	NA
A_crys	CHI&SYM	Spe39|Spe52	GMYN	0.647383	3.50413	0.184749	5.56e-19	498	106.93	391.07	NA	261	94.5372	166.463	NA	NA	1.26078	1.2352:1.45418:1:1:1:1	0.49498(0.551205:0.355422:0.578313)	NA	NA	NA	NA
A_crys	SYM&CHI	Spe07|Spe39	GMYN	0.311651	3.74407	0.0832386	1.15e-67	678	147.244	530.756	NA	279	145.203	133.797	NA	NA	1.05708	0.91666:1.29282:1:1:1:1	0.494838(0.486726:0.415929:0.581858)	NA	NA	NA	NA
A_crys	CHI&SYM	Spe01|Spe09	GMYN	0.780494	3.58028	0.217998	1.73e-11	537	118.358	418.642	NA	296	96.4426	199.557	NA	NA	1.39758	1.47209:1.13402:1:1:1:1	0.489758(0.522346:0.396648:0.550279)	NA	NA	NA	NA
A_crys	CHI&DIP	Spe41|Spe46	GMYN	0.45146	3.3277	0.135667	3.57e-29	519	84.515	434.485	NA	226	80.8003	145.2	NA	NA	0.919832	0.96191:1.7222:1:1:1:1	0.631985(0.653179:0.421965:0.820809)	NA	NA	NA	NA
A_crys	CHI&DIP	Spe01|Spe43	GMYN	1.02053	3.75284	0.271936	2.09e-17	636	148.977	487.023	NA	400	134.135	265.865	NA	NA	1.66055	1.08533:1.09538:1:1:1:1	0.541667(0.570755:0.488208:0.566038)	NA	NA	NA	NA
A_crys	CHI&DIP	Spe39|Spe43	GMYN	0.794763	3.54982	0.223888	7.95e-21	513	113.646	399.354	NA	295	105.215	189.785	NA	NA	1.4051	0.929675:2.02502:1:1:1:1	0.534113(0.54386:0.473684:0.584795)	NA	NA	NA	NA
A_crys	DIP&SYM	Spe50|Spe52	GMYN	0.281307	3.48664	0.0806814	0	546	104.465	441.535	NA	214	111.312	102.688	NA	NA	0.894577	1.11667:1.48508:1:1:1:1	0.590659(0.623626:0.403846:0.744505)	NA	NA	NA	NA
A_crys	DIP&PAU	Spe44|Spe51	GMYN	0.790274	3.58052	0.220715	6.44e-10	525	118.395	406.605	NA	289	93.967	195.033	NA	NA	1.41951	1.05216:1.62719:1:1:1:1	0.493333(0.531429:0.374286:0.574286)	NA	NA	NA	NA
A_crys	DIP&SYM	Spe17|Spe52	GMYN	0.379496	3.44622	0.110119	1.07e-40	549	98.9846	450.015	NA	229	96.3567	132.643	NA	NA	0.932426	1.18276:1.36766:1:1:1:1	0.590164(0.614754:0.39071:0.765027)	NA	NA	NA	NA
A_crys	CHI&DIP	Spe03|Spe44	GMYN	0.469621	3.62668	0.129491	1.11e-25	555	125.91	429.09	NA	255	107.684	147.316	NA	NA	1.18585	0.795018:1.96792:1:1:1:1	0.461261(0.556757:0.394595:0.432432)	NA	NA	NA	NA
A_crys	SYM&DIP	Spe07|Spe16	GMYN	0.854989	3.61027	0.236821	6.59e-10	558	123.186	434.814	NA	315	98.2657	216.734	NA	NA	1.46326	1.13234:2.18515:1:1:1:1	0.486559(0.478495:0.392473:0.58871)	NA	NA	NA	NA
A_crys	CHI&DIP	Spe05|Spe14	GMYN	0.517765	3.58792	0.144308	2.7e-14	519	119.568	399.432	NA	238	90.8697	147.13	NA	NA	1.22507	1.05149:1.66105:1:1:1:1	0.507707(0.580925:0.387283:0.554913)	NA	NA	NA	NA
A_crys	DIP&DIP	Spe44|Spe47	GMYN	0.596336	1.73442	0.343824	3.56e-07	447	117.967	329.033	NA	213	79.7158	133.284	NA	NA	0.896687	1.84733:2.42431:1:1:1:1	0.527964(0.607383:0.389262:0.587248)	NA	NA	NA	NA
A_crys	SYM&DIP	Spe09|Spe15	GMYN	0.692472	3.51515	0.196996	1.48e-19	528	108.512	419.488	NA	283	97.9513	185.049	NA	NA	1.27258	0.920531:1.77014:1:1:1:1	0.512311(0.559659:0.380682:0.596591)	NA	NA	NA	NA
A_crys	CHI&DIP	Spe33|Spe42	GMYN	0.440894	3.60585	0.122272	1.1e-28	516	122.462	393.538	NA	237	107.729	129.271	NA	NA	1.19203	0.961678:1.12145:1:1:1:1	0.501938(0.593023:0.383721:0.52907)	NA	NA	NA	NA
A_crys	DIP&CHI	Spe14|Spe32	GMYN	0.268103	3.66191	0.073214	4.19e-37	519	131.966	387.034	NA	197	110.549	86.4513	NA	NA	1.13105	1.31227:1.77323:1:1:1:1	0.514451(0.618497:0.407514:0.517341)	NA	NA	NA	NA
A_crys	DIP&DIP	Spe48|Spe49	GMYN	0.3884	3.68381	0.105434	1.91e-30	591	135.877	455.123	NA	251	114.809	136.191	NA	NA	1.14605	0.802953:1.5293:1:1:1:1	0.484772(0.624365:0.426396:0.403553)	NA	NA	NA	NA
A_crys	DIP&CHI	Spe12|Spe39	GMYN	0.742133	2.95546	0.251106	8.35e-08	516	121.714	394.286	NA	272	89.5115	182.489	NA	NA	1.26421	1.60906:1.15472:1:1:1:1	0.494186(0.546512:0.398256:0.537791)	NA	NA	NA	NA
A_crys	DIP&CHI	Spe11|Spe34	GMYN	0.644491	3.5961	0.17922	1.18e-12	519	120.88	398.12	NA	263	94.579	168.421	NA	NA	1.33195	0.714464:2.03536:1:1:1:1	0.484586(0.557803:0.364162:0.531792)	NA	NA	NA	NA
A_crys	CHI&DIP	Spe32|Spe43	GMYN	0.715789	3.73722	0.19153	7.53e-24	570	145.906	424.094	NA	324	131.628	192.372	NA	NA	1.4892	1.2134:1.77126:1:1:1:1	0.541228(0.6:0.494737:0.528947)	NA	NA	NA	NA
A_crys	CHI&SYM	Spe01|Spe08	GMYN	0.785303	3.59626	0.218366	2.47e-13	540	120.907	419.093	NA	300	101.14	198.86	NA	NA	1.41468	0.922643:1.36229:1:1:1:1	0.49537(0.575:0.394444:0.516667)	NA	NA	NA	NA
A_crys	CHI&DIP	Spe39|Spe50	GMYN	0.603696	3.49371	0.172795	2.21e-25	492	105.454	386.546	NA	256	98.7687	157.231	NA	NA	1.22314	1.06452:1.77091:1:1:1:1	0.542683(0.557927:0.429878:0.640244)	NA	NA	NA	NA
A_crys	DIP&CHI	Spe15|Spe32	GMYN	0.280942	3.62299	0.0775441	3.38e-60	570	125.294	444.706	NA	226	123.136	102.864	NA	NA	1.01557	0.569463:1.79259:1:1:1:1	0.49386(0.605263:0.415789:0.460526)	NA	NA	NA	NA
A_crys	SYM&PAU	Spe08|Spe10	GMYN	0.801642	3.60431	0.222412	4.47e-12	513	122.21	390.79	NA	289	100.721	188.279	NA	NA	1.46931	0.957071:1.54587:1:1:1:1	0.493177(0.570175:0.391813:0.517544)	NA	NA	NA	NA
A_crys	CHI&DIP	Spe38|Spe43	GMYN	0.711707	3.66612	0.194131	4.75e-19	546	132.708	413.292	NA	302	115.32	186.68	NA	NA	1.42979	1.08308:1.9123:1:1:1:1	0.548535(0.587912:0.464286:0.593407)	NA	NA	NA	NA
A_crys	CHI&DIP	Spe03|Spe13	GMYN	0.636422	3.58933	0.17731	4.39e-32	576	119.793	456.207	NA	306	115.178	190.822	NA	NA	1.25055	0.448909:1.42248:1:1:1:1	0.446181(0.53125:0.393229:0.414062)	NA	NA	NA	NA
A_crys	CHI&DIP	Spe02|Spe49	GMYN	0.639401	3.58995	0.178109	1.53e-13	504	119.893	384.107	NA	258	95.9495	162.051	NA	NA	1.34128	1.6454:1.75759:1:1:1:1	0.443452(0.568452:0.360119:0.401786)	NA	NA	NA	NA
A_crys	DIP&CHI	Spe11|Spe36	GMYN	0.298472	3.63242	0.0821689	7.12e-33	552	126.878	425.122	NA	208	104.725	103.275	NA	NA	1.06478	0.762156:1.0288:1:1:1:1	0.48913(0.600543:0.404891:0.461957)	NA	NA	NA	NA
A_crys	CHI&CHI	Spe04|Spe32	GMYN	0.432345	3.71856	0.116267	3.99e-35	582	142.321	439.679	NA	270	127.385	142.615	NA	NA	1.23595	1.03533:1.44043:1:1:1:1	0.513746(0.585052:0.445876:0.510309)	NA	NA	NA	NA
A_crys	SYM&CHI	Spe07|Spe35	GMYN	0.815254	3.56459	0.228709	5.09e-18	564	115.907	448.093	NA	323	104.899	218.101	NA	NA	1.38027	1.10034:1.56565:1:1:1:1	0.508865(0.492021:0.388298:0.646277)	NA	NA	NA	NA
A_crys	CHI&SYM	Spe02|Spe07	GMYN	0.227591	3.62169	0.0628411	1.19e-61	540	125.076	414.924	NA	202	121.299	80.7006	NA	NA	1.01374	1.45099:1.69619:1:1:1:1	0.477778(0.513889:0.366667:0.552778)	NA	NA	NA	NA
A_crys	DIP&DIP	Spe43|Spe44	GMYN	0.721381	2.65926	0.271271	4.05e-07	516	142.082	373.918	NA	270	99.5762	170.424	NA	NA	1.25498	1.8458:2.32385:1:1:1:1	0.542636(0.604651:0.459302:0.563953)	NA	NA	NA	NA
A_crys	CHI&DIP	Spe38|Spe44	GMYN	0.332963	3.66407	0.0908725	2.57e-30	534	132.347	401.653	NA	215	108.139	106.861	NA	NA	1.15855	1.18067:1.72041:1:1:1:1	0.487828(0.575843:0.393258:0.494382)	NA	NA	NA	NA
A_crys	DIP&DIP	Spe14|Spe46	GMYN	0.36191	3.36757	0.107469	2.11e-37	507	89.1298	417.87	NA	205	86.4513	118.549	NA	NA	0.890301	0.891576:1.78152:1:1:1:1	0.617357(0.659763:0.402367:0.789941)	NA	NA	NA	NA
A_crys	DIP&SYM	Spe14|Spe52	GMYN	0.270311	3.56811	0.0757577	4.17e-37	522	116.452	405.548	NA	192	100.736	91.2641	NA	NA	1.00601	1.53566:1.56716:1:1:1:1	0.564176(0.623563:0.387931:0.681034)	NA	NA	NA	NA
A_crys	CHI&DIP	Spe40|Spe50	GMYN	0.674564	3.56289	0.189331	2.94e-18	549	115.644	433.356	NA	290	100.928	189.072	NA	NA	1.28298	1.06263:1.12754:1:1:1:1	0.568306(0.60929:0.442623:0.653005)	NA	NA	NA	NA
A_crys	CHI&SYM	Spe33|Spe52	GMYN	0.458823	3.60297	0.127346	3.66e-38	522	121.992	400.008	NA	252	116.332	135.668	NA	NA	1.19362	1.33722:1.07851:1:1:1:1	0.525862(0.600575:0.37931:0.597701)	NA	NA	NA	NA
A_crys	CHI&CHI	Spe05|Spe36	GMYN	0.600661	3.56086	0.168684	8.64e-21	531	115.333	415.667	NA	268	100.732	167.268	NA	NA	1.24361	0.57414:2.37222:1:1:1:1	0.462335(0.573446:0.412429:0.40113)	NA	NA	NA	NA
A_crys	SYM&DIP	Spe09|Spe17	GMYN	0.617639	3.31449	0.186345	0	516	83.0396	432.96	NA	268	89.2875	178.713	NA	NA	1.05164	0.893323:1.98722:1:1:1:1	0.549419(0.534884:0.377907:0.735465)	NA	NA	NA	NA
A_crys	CHI&DIP	Spe05|Spe43	GMYN	0.969674	3.68657	0.263029	2.54e-07	561	136.378	424.622	NA	331	105.326	225.674	NA	NA	1.63015	1.23467:2.41716:1:1:1:1	0.534759(0.561497:0.465241:0.57754)	NA	NA	NA	NA
A_crys	PAU&CHI	Spe10|Spe32	GMYN	0.842726	3.61454	0.233149	2.9e-09	555	123.889	431.111	NA	310	97.1302	212.87	NA	NA	1.46146	0.940594:1.62626:1:1:1:1	0.47027(0.57027:0.427027:0.413514)	NA	NA	NA	NA
A_crys	DIP&PAU	Spe50|Spe51	GMYN	0.701233	3.41376	0.205414	1.38e-15	558	94.7914	463.209	NA	289	82.7346	206.265	NA	NA	1.16203	0.778342:2.11614:1:1:1:1	0.556452(0.548387:0.389785:0.731183)	NA	NA	NA	NA
A_crys	CHI&DIP	Spe34|Spe50	GMYN	0.742745	3.6062	0.205963	4.44e-21	567	122.519	444.481	NA	316	111.229	204.771	NA	NA	1.36149	1.28799:2.78022:1:1:1:1	0.538801(0.555556:0.399471:0.661376)	NA	NA	NA	NA
A_crys	DIP&DIP	Spe44|Spe48	GMYN	0.307286	3.61915	0.0849054	4.32e-26	549	124.653	424.347	NA	202	96.3678	105.632	NA	NA	1.05926	0.736001:1.20888:1:1:1:1	0.480874(0.601093:0.398907:0.442623)	NA	NA	NA	NA
A_crys	DIP&DIP	Spe43|Spe50	GMYN	0.661049	3.5175	0.187932	3.72e-24	534	108.853	425.147	NA	286	101.87	184.13	NA	NA	1.24332	1.57744:1.67199:1:1:1:1	0.61985(0.61236:0.491573:0.755618)	NA	NA	NA	NA
A_crys	CHI&SYM	Spe04|Spe52	GMYN	0.419992	3.62101	0.115987	3.15e-26	579	124.963	454.037	NA	248	104.083	143.917	NA	NA	1.11085	1.0488:0.786765:1:1:1:1	0.569948(0.61399:0.419689:0.676166)	NA	NA	NA	NA
A_crys	CHI&CHI	Spe35|Spe38	GMYN	0.486823	3.59958	0.135244	6.75e-24	534	121.442	412.558	NA	249	103.717	145.283	NA	NA	1.19473	0.929931:1.62554:1:1:1:1	0.497191(0.55618:0.382022:0.553371)	NA	NA	NA	NA
A_crys	DIP&PAU	Spe14|Spe51	GMYN	0.809421	2.18488	0.370465	1.67e-05	504	113.564	390.436	NA	270	80.548	189.452	NA	NA	1.11935	1.56288:2.64986:1:1:1:1	0.539683(0.574405:0.369048:0.675595)	NA	NA	NA	NA
A_crys	DIP&CHI	Spe14|Spe33	GMYN	0.444863	3.59695	0.123678	1.16e-25	513	121.017	391.983	NA	233	103.159	129.841	NA	NA	1.18844	1.03079:1.24212:1:1:1:1	0.525341(0.614035:0.385965:0.576023)	NA	NA	NA	NA
A_crys	CHI&DIP	Spe36|Spe48	GMYN	0.0517567	0.113073	0.45773	0.0246016	606	165.021	440.979	NA	39	17	22	NA	NA	0.0684537	3.00407:2.74192:1:1:1:1	0.479373(0.608911:0.433168:0.39604)	NA	NA	NA	NA
A_crys	CHI&DIP	Spe34|Spe47	GMYN	0.926795	3.64293	0.254409	6.67e-07	531	128.669	402.331	NA	308	98.4071	209.593	NA	NA	1.58496	1.12501:1.6409:1:1:1:1	0.499058(0.579096:0.372881:0.545198)	NA	NA	NA	NA
A_crys	CHI&DIP	Spe37|Spe47	GMYN	0.938958	3.58436	0.26196	8.17e-07	507	119.003	387.997	NA	294	91.6671	202.333	NA	NA	1.55988	1.05461:1.85676:1:1:1:1	0.504931(0.58284:0.387574:0.544379)	NA	NA	NA	NA
A_crys	PAU&DIP	Spe10|Spe47	GMYN	0.838014	4.41713	0.189719	0.000796268	444	107.053	336.947	NA	239	72.3334	166.667	NA	NA	1.70098	1.11145:1.67957:1:1:1:1	0.52027(0.577703:0.429054:0.554054)	NA	NA	NA	NA
A_crys	CHI&CHI	Spe02|Spe41	GMYN	0.797419	3.5763	0.222973	1.79e-11	498	117.731	380.269	NA	280	96.9294	183.071	NA	NA	1.45437	1.46998:1.66973:1:1:1:1	0.506024(0.557229:0.376506:0.584337)	NA	NA	NA	NA
A_crys	CHI&SYM	Spe05|Spe09	GMYN	0.881221	3.55214	0.248082	3.93e-09	513	113.998	399.002	NA	293	91.6982	201.302	NA	NA	1.47475	1.27491:2.52324:1:1:1:1	0.476608(0.51462:0.368421:0.546784)	NA	NA	NA	NA
A_crys	CHI&DIP	Spe40|Spe43	GMYN	0.891469	3.68137	0.242157	7.53e-10	573	135.435	437.565	NA	331	108.249	222.751	NA	NA	1.55089	0.880259:1.10593:1:1:1:1	0.554974(0.586387:0.497382:0.581152)	NA	NA	NA	NA
A_crys	CHI&CHI	Spe31|Spe37	GMYN	1.07873	3.76652	0.2864	5.69e-10	654	151.719	502.281	NA	406	125.439	280.561	NA	NA	1.70226	1.28406:0.811459:1:1:1:1	0.5(0.566514:0.419725:0.513761)	NA	NA	NA	NA
A_crys	CHI&DIP	Spe35|Spe47	GMYN	0.788297	3.54276	0.222509	4.29e-14	495	112.582	382.418	NA	279	96.9637	182.036	NA	NA	1.41477	0.652637:1.57089:1:1:1:1	0.540404(0.581818:0.412121:0.627273)	NA	NA	NA	NA
A_crys	SYM&DIP	Spe09|Spe47	GMYN	0.66615	3.45042	0.193064	1.39e-20	471	99.5396	371.46	NA	253	91.9946	161.005	NA	NA	1.25457	1.35833:2.24716:1:1:1:1	0.52017(0.55414:0.363057:0.643312)	NA	NA	NA	NA
A_crys	CHI&CHI	Spe36|Spe37	GMYN	0.920571	3.65993	0.251527	2.81e-13	582	131.618	450.382	NA	347	113	234	NA	NA	1.54007	1.46264:1.18601:1:1:1:1	0.465636(0.585052:0.407216:0.404639)	NA	NA	NA	NA
A_crys	CHI&SYM	Spe38|Spe52	GMYN	0.318931	3.58805	0.088887	6.04e-40	537	119.59	417.41	NA	216	108.763	107.237	NA	NA	1.04697	0.786518:1.47719:1:1:1:1	0.527002(0.592179:0.388268:0.600559)	NA	NA	NA	NA
A_crys	CHI&DIP	Spe01|Spe16	GMYN	1.0375	3.66711	0.28292	1.39e-07	612	132.884	479.116	NA	368	105.184	262.816	NA	NA	1.60847	1.24109:0.943978:1:1:1:1	0.454248(0.509804:0.382353:0.470588)	NA	NA	NA	NA
A_crys	DIP&CHI	Spe14|Spe39	GMYN	0.553172	3.54305	0.156129	1.88e-20	462	112.626	349.374	NA	232	97.6434	134.357	NA	NA	1.28204	1.48693:1.97887:1:1:1:1	0.50974(0.577922:0.363636:0.587662)	NA	NA	NA	NA
A_crys	SYM&CHI	Spe08|Spe36	GMYN	0.376022	3.67144	0.102418	6.47e-36	567	133.655	433.345	NA	245	118.628	126.372	NA	NA	1.15283	0.824405:1.35739:1:1:1:1	0.4903(0.600529:0.399471:0.470899)	NA	NA	NA	NA
A_crys	CHI&CHI	Spe03|Spe39	GMYN	1.11093	3.60994	0.307741	6.53e-10	564	123.132	440.868	NA	345	103.177	241.823	NA	NA	1.65651	1.18385:2.71498:1:1:1:1	0.449468(0.513298:0.388298:0.446809)	NA	NA	NA	NA
A_crys	CHI&DIP	Spe36|Spe43	GMYN	0.746541	3.7291	0.200193	1.03e-23	570	144.334	425.666	NA	329	131.142	197.858	NA	NA	1.50178	1.16426:1.65352:1:1:1:1	0.541228(0.597368:0.489474:0.536842)	NA	NA	NA	NA
A_crys	CHI&DIP	Spe03|Spe50	GMYN	0.503351	3.56521	0.141184	0	543	116.002	426.998	NA	279	124.993	154.007	NA	NA	1.15746	0.845703:1.99825:1:1:1:1	0.525783(0.569061:0.411602:0.596685)	NA	NA	NA	NA
A_crys	CHI&CHI	Spe37|Spe38	GMYN	0.81416	3.47349	0.234393	1.8e-09	495	102.649	392.351	NA	273	82.9892	190.011	NA	NA	1.36563	1.01866:1.05964:1:1:1:1	0.470707(0.566667:0.363636:0.481818)	NA	NA	NA	NA
A_crys	CHI&DIP	Spe04|Spe46	GMYN	0.451019	3.37814	0.133511	0	528	90.3948	437.605	NA	237	90.6248	146.375	NA	NA	0.952149	1.17808:1.77762:1:1:1:1	0.616477(0.633523:0.423295:0.792614)	NA	NA	NA	NA
A_crys	CHI&SYM	Spe36|Spe52	GMYN	0.383636	3.76046	0.102018	2.48e-28	573	150.497	422.503	NA	247	121.369	125.631	NA	NA	1.27055	1.74538:1.45191:1:1:1:1	0.526178(0.615183:0.41623:0.54712)	NA	NA	NA	NA
A_crys	CHI&DIP	Spe33|Spe43	GMYN	0.82942	2.88954	0.287042	2.38e-07	591	151.056	439.944	NA	328	110.888	217.112	NA	NA	1.35597	1.56103:1.53359:1:1:1:1	0.543147(0.581218:0.477157:0.571066)	NA	NA	NA	NA
A_crys	SYM&DIP	Spe07|Spe12	GMYN	0.655159	3.54623	0.184748	6.32e-16	483	113.104	369.896	NA	255	95.9128	159.087	NA	NA	1.33216	1.74551:1.64945:1:1:1:1	0.534161(0.552795:0.403727:0.645963)	NA	NA	NA	NA
A_crys	PAU&CHI	Spe10|Spe33	GMYN	0.817592	3.58304	0.228184	4.93e-09	519	118.793	400.207	NA	287	92.7775	194.223	NA	NA	1.45057	0.862462:1.33018:1:1:1:1	0.476879(0.540462:0.427746:0.462428)	NA	NA	NA	NA
A_crys	CHI&SYM	Spe03|Spe09	GMYN	0.708451	3.55293	0.199399	1.38e-21	546	114.119	431.881	NA	298	104.324	193.676	NA	NA	1.30297	0.984783:1.89037:1:1:1:1	0.467949(0.5:0.381868:0.521978)	NA	NA	NA	NA
A_crys	CHI&DIP	Spe32|Spe42	GMYN	0.300617	3.69847	0.0812816	1.23e-36	546	138.558	407.442	NA	216	116.386	99.6144	NA	NA	1.16289	0.777692:2.32231:1:1:1:1	0.499084(0.598901:0.425824:0.472527)	NA	NA	NA	NA
A_crys	SYM&DIP	Spe08|Spe44	GMYN	0.30164	3.70231	0.0814733	4.01e-45	555	139.271	415.729	NA	228	125.631	102.369	NA	NA	1.155	1.57677:1.31872:1:1:1:1	0.497297(0.589189:0.375676:0.527027)	NA	NA	NA	NA
A_crys	CHI&CHI	Spe03|Spe41	GMYN	0.845633	1.64986	0.51255	0.00166491	786	231.143	554.857	NA	420	143.569	276.431	NA	NA	1.08214	1.35178:2.00201:1:1:1:1	0.529898(0.614504:0.479008:0.496183)	NA	NA	NA	NA
A_crys	CHI&CHI	Spe03|Spe32	GMYN	0.490763	3.68789	0.133074	1.18e-21	591	136.617	454.383	NA	271	110.185	160.815	NA	NA	1.22982	1.34351:2.92277:1:1:1:1	0.461929(0.558376:0.436548:0.390863)	NA	NA	NA	NA
A_crys	CHI&DIP	Spe31|Spe46	GMYN	0.517751	3.49474	0.148151	5.16e-34	543	105.6	437.4	NA	264	102.752	161.248	NA	NA	1.0967	1.76154:1.98197:1:1:1:1	0.612339(0.638122:0.430939:0.767956)	NA	NA	NA	NA
A_crys	PAU&DIP	Spe10|Spe14	GMYN	0.868218	3.59042	0.241815	2.18e-10	510	119.969	390.031	NA	295	98.6157	196.384	NA	NA	1.50857	1.18715:1.55348:1:1:1:1	0.52549(0.594118:0.408824:0.573529)	NA	NA	NA	NA
A_crys	CHI&DIP	Spe05|Spe17	GMYN	0.587542	3.48185	0.168744	0	522	103.8	418.2	NA	279	111.728	167.272	NA	NA	1.16308	0.823213:1.77142:1:1:1:1	0.523946(0.560345:0.373563:0.637931)	NA	NA	NA	NA
A_crys	DIP&DIP	Spe11|Spe44	GMYN	0.0490219	0.470249	0.104247	3.71e-16	555	132.76	422.24	NA	64	44	20	NA	NA	0.149783	1.01572:1.17033:1:1:1:1	0.498198(0.594595:0.383784:0.516216)	NA	NA	NA	NA
A_crys	CHI&DIP	Spe32|Spe50	GMYN	0.297796	3.61521	0.0823731	0	555	123.999	431.001	NA	233	128.296	104.704	NA	NA	1.03898	0.691837:1.25594:1:1:1:1	0.545045(0.610811:0.432432:0.591892)	NA	NA	NA	NA
A_crys	CHI&DIP	Spe05|Spe49	GMYN	0.630695	3.63549	0.173483	3.03e-19	567	127.399	439.601	NA	292	108.251	183.749	NA	NA	1.30584	0.984113:1.80199:1:1:1:1	0.458554(0.57672:0.380952:0.417989)	NA	NA	NA	NA
A_crys	DIP&DIP	Spe12|Spe14	GMYN	0.238623	3.56261	0.0669798	3.06e-45	522	115.601	406.399	NA	187	104.621	82.3793	NA	NA	0.974742	0.98819:1.426:1:1:1:1	0.544061(0.600575:0.387931:0.643678)	NA	NA	NA	NA
A_crys	DIP&CHI	Spe12|Spe40	GMYN	0.798241	3.62959	0.219926	2.28e-13	540	126.399	413.601	NA	303	105.283	197.717	NA	NA	1.46098	0.797541:1.87181:1:1:1:1	0.509259(0.583333:0.411111:0.533333)	NA	NA	NA	NA
A_crys	CHI&CHI	Spe03|Spe36	GMYN	0.490763	3.68789	0.133074	1.18e-21	591	136.617	454.383	NA	271	110.185	160.815	NA	NA	1.22982	1.34351:2.92277:1:1:1:1	0.461929(0.558376:0.436548:0.390863)	NA	NA	NA	NA
A_crys	CHI&CHI	Spe34|Spe38	GMYN	0.616989	3.56157	0.173235	6.13e-15	531	115.44	415.56	NA	264	93.0078	170.992	NA	NA	1.25715	0.636793:1.48296:1:1:1:1	0.471751(0.539548:0.375706:0.5)	NA	NA	NA	NA
A_crys	PAU&DIP	Spe10|Spe11	GMYN	0.916987	3.60124	0.254631	2.14e-08	543	121.712	421.288	NA	314	96.7939	217.206	NA	NA	1.51866	0.905913:1.02632:1:1:1:1	0.488029(0.571823:0.395028:0.497238)	NA	NA	NA	NA
A_crys	CHI&DIP	Spe01|Spe12	GMYN	0.955188	4.18321	0.228339	5.55e-06	564	134.31	429.69	NA	328	100.352	227.648	NA	NA	1.7239	1.60555:1.16597:1:1:1:1	0.507979(0.566489:0.412234:0.545213)	NA	NA	NA	NA
A_crys	CHI&SYM	Spe37|Spe52	GMYN	0.774722	3.55102	0.218169	9.63e-11	543	113.828	429.172	NA	294	91.1961	202.804	NA	NA	1.35671	0.790901:1.00656:1:1:1:1	0.514733(0.61326:0.361878:0.569061)	NA	NA	NA	NA
A_crys	CHI&DIP	Spe01|Spe48	GMYN	0.922569	3.69102	0.24995	1.2e-07	582	137.188	444.812	NA	336	105.171	230.829	NA	NA	1.57514	1.39934:1.70438:1:1:1:1	0.474227(0.569588:0.409794:0.443299)	NA	NA	NA	NA
A_crys	CHI&CHI	Spe33|Spe36	GMYN	0.562942	3.62164	0.155439	3.49e-21	537	125.068	411.932	NA	267	106.668	160.332	NA	NA	1.27531	1.02508:1.62623:1:1:1:1	0.47486(0.583799:0.405028:0.435754)	NA	NA	NA	NA
A_crys	DIP&DIP	Spe45|Spe49	GMYN	0.442609	3.75422	0.117896	1.62e-23	582	149.251	432.749	NA	261	118.261	142.739	NA	NA	1.29186	1.09066:1.74274:1:1:1:1	0.504296(0.628866:0.39433:0.489691)	NA	NA	NA	NA
A_crys	CHI&CHI	Spe02|Spe32	GMYN	0.602222	3.51966	0.171102	2.22e-13	504	109.167	394.833	NA	247	86.5583	160.442	NA	NA	1.23414	1.36801:1.31485:1:1:1:1	0.443452(0.550595:0.377976:0.401786)	NA	NA	NA	NA
A_crys	DIP&DIP	Spe15|Spe45	GMYN	0.345373	3.60768	0.0957326	8.18e-39	534	122.762	411.238	NA	224	111.709	112.291	NA	NA	1.09535	0.788654:1.65108:1:1:1:1	0.521536(0.626404:0.373596:0.564607)	NA	NA	NA	NA
A_crys	DIP&DIP	Spe42|Spe50	GMYN	0.243835	3.62244	0.0673125	6.43e-32	543	125.2	417.8	NA	184	97.8797	86.1203	NA	NA	1.02285	1.11847:2.51751:1:1:1:1	0.571823(0.610497:0.428177:0.676796)	NA	NA	NA	NA
A_crys	CHI&DIP	Spe39|Spe44	GMYN	0.694182	3.60309	0.192663	3.78e-10	492	122.013	369.987	NA	258	93.3901	164.61	NA	NA	1.41557	1.69863:1.55789:1:1:1:1	0.477642(0.551829:0.387195:0.493902)	NA	NA	NA	NA
A_crys	PAU&DIP	Spe10|Spe49	GMYN	0.97971	3.31398	0.295629	2.45e-06	660	161.642	498.358	NA	386	119.771	266.229	NA	NA	1.5514	0.861963:1.29386:1:1:1:1	0.495455(0.602273:0.470455:0.413636)	NA	NA	NA	NA
A_crys	CHI&DIP	Spe31|Spe48	GMYN	0.440016	3.7299	0.11797	1.26e-28	594	144.488	449.512	NA	269	121.372	147.628	NA	NA	1.24027	0.975875:1.6026:1:1:1:1	0.508418(0.598485:0.431818:0.494949)	NA	NA	NA	NA
A_crys	CHI&DIP	Spe35|Spe43	GMYN	1.02561	2.44234	0.419928	0.000186103	558	134.72	423.28	NA	328	97.1472	230.853	NA	NA	1.36765	2.00906:2.61631:1:1:1:1	0.564516(0.580645:0.456989:0.655914)	NA	NA	NA	NA
A_crys	SYM&CHI	Spe08|Spe41	GMYN	0.444921	3.62156	0.122853	5.03e-22	543	125.054	417.946	NA	240	101.757	138.243	NA	NA	1.17651	1.03055:1.5869:1:1:1:1	0.54512(0.616022:0.381215:0.638122)	NA	NA	NA	NA
A_crys	CHI&CHI	Spe31|Spe35	GMYN	0.534945	3.66453	0.145979	4.16e-27	558	132.428	425.572	NA	278	117.555	160.445	NA	NA	1.27768	1.40219:1.73121:1:1:1:1	0.518817(0.540323:0.413978:0.602151)	NA	NA	NA	NA
A_crys	CHI&CHI	Spe04|Spe05	GMYN	0.595941	3.60392	0.165359	4.18e-20	546	122.148	423.852	NA	276	104.577	171.423	NA	NA	1.26887	0.99999:1.36569:1:1:1:1	0.498168(0.557692:0.398352:0.538462)	NA	NA	NA	NA
A_crys	DIP&CHI	Spe16|Spe39	GMYN	0.904448	3.74838	0.241291	2.85e-10	615	148.092	466.908	NA	359	118.63	240.37	NA	NA	1.58927	1.8332:1.834:1:1:1:1	0.444715(0.485366:0.387805:0.460976)	NA	NA	NA	NA
A_crys	CHI&CHI	Spe04|Spe31	GMYN	0.0537822	0.295307	0.182123	3.71e-10	630	166.534	463.466	NA	63	39	24	NA	NA	0.117627	2.04193:2.59469:1:1:1:1	0.555556(0.588095:0.457143:0.621429)	NA	NA	NA	NA
A_crys	CHI&PAU	Spe02|Spe51	GMYN	0.87262	3.54986	0.245818	9.16e-12	513	113.653	399.347	NA	294	95.2876	198.712	NA	NA	1.46575	0.852907:2.38199:1:1:1:1	0.462963(0.511696:0.347953:0.52924)	NA	NA	NA	NA
A_crys	DIP&DIP	Spe13|Spe14	GMYN	0.584291	3.6278	0.16106	7.21e-17	501	126.099	374.901	NA	253	103.111	149.889	NA	NA	1.35032	1.18461:1.63808:1:1:1:1	0.515968(0.58982:0.407186:0.550898)	NA	NA	NA	NA
A_crys	CHI&DIP	Spe38|Spe42	GMYN	0.326105	3.6609	0.0890779	7.52e-34	537	131.788	405.212	NA	217	111.046	105.954	NA	NA	1.14452	0.845378:1.69543:1:1:1:1	0.510242(0.586592:0.410615:0.53352)	NA	NA	NA	NA
A_crys	CHI&PAU	Spe05|Spe10	GMYN	0.931045	3.49995	0.266016	6.85e-07	468	106.336	361.664	NA	268	82.871	185.129	NA	NA	1.51473	1.2475:2.51543:1:1:1:1	0.46047(0.532051:0.400641:0.448718)	NA	NA	NA	NA
A_crys	CHI&CHI	Spe04|Spe33	GMYN	0.465886	3.61025	0.129045	5.66e-29	528	123.183	404.817	NA	248	109.374	138.626	NA	NA	1.19947	1.1416:1.40961:1:1:1:1	0.520833(0.582386:0.403409:0.576705)	NA	NA	NA	NA
A_crys	PAU&DIP	Spe10|Spe43	GMYN	1.06002	3.66521	0.289212	2.24e-09	537	132.548	404.452	NA	335	110.699	224.301	NA	NA	1.70307	1.15833:1.59662:1:1:1:1	0.540968(0.583799:0.480447:0.558659)	NA	NA	NA	NA
A_crys	CHI&CHI	Spe01|Spe40	GMYN	0.819459	3.62333	0.226162	1.6e-15	573	125.35	447.65	NA	325	108.306	216.694	NA	NA	1.43284	0.881602:0.833137:1:1:1:1	0.495637(0.586387:0.424084:0.47644)	NA	NA	NA	NA
A_crys	SYM&CHI	Spe09|Spe34	GMYN	0.827245	3.53428	0.234063	1.48e-14	519	111.317	407.683	NA	297	97.337	199.663	NA	NA	1.40786	0.95746:1.99023:1:1:1:1	0.481696(0.523121:0.361272:0.560694)	NA	NA	NA	NA
A_crys	CHI&SYM	Spe03|Spe52	GMYN	0.46319	3.73843	0.1239	4.28e-30	573	146.141	426.859	NA	272	126.379	145.621	NA	NA	1.29853	1.31736:2.25332:1:1:1:1	0.512216(0.575916:0.405759:0.554974)	NA	NA	NA	NA
A_crys	CHI&DIP	Spe01|Spe11	GMYN	0.735633	3.66839	0.200533	1.39e-15	555	133.112	421.888	NA	306	111.679	194.321	NA	NA	1.43903	1.41628:1.33581:1:1:1:1	0.496396(0.586486:0.397297:0.505405)	NA	NA	NA	NA
A_crys	SYM&CHI	Spe09|Spe39	GMYN	0.766199	3.34512	0.229049	6.78e-11	462	86.5018	375.498	NA	248	72.7231	175.277	NA	NA	1.24906	0.691393:1.44044:1:1:1:1	0.474026(0.522727:0.337662:0.561688)	NA	NA	NA	NA
A_crys	CHI&DIP	Spe37|Spe50	GMYN	0.755109	3.53271	0.213748	1.61e-26	564	111.084	452.916	NA	319	107.749	211.251	NA	NA	1.30218	0.816863:1.0022:1:1:1:1	0.537234(0.582447:0.398936:0.630319)	NA	NA	NA	NA
A_crys	CHI&DIP	Spe04|Spe43	GMYN	0.699261	3.69679	0.189153	1.1e-12	546	138.249	407.751	NA	292	109.221	182.779	NA	NA	1.45825	1.74558:1.62166:1:1:1:1	0.589744(0.629121:0.483516:0.656593)	NA	NA	NA	NA
A_crys	DIP&PAU	Spe15|Spe51	GMYN	0.689298	3.56378	0.193418	1.36e-17	516	115.782	400.218	NA	278	100.757	177.243	NA	NA	1.33428	1.27938:1.9356:1:1:1:1	0.510659(0.549419:0.372093:0.610465)	NA	NA	NA	NA
A_crys	CHI&PAU	Spe32|Spe51	GMYN	0.757511	3.56393	0.212549	1.46e-12	504	115.805	388.195	NA	276	95.0002	181	NA	NA	1.40235	0.859615:1.94266:1:1:1:1	0.492063(0.553571:0.383929:0.53869)	NA	NA	NA	NA
A_crys	CHI&DIP	Spe39|Spe46	GMYN	0.757287	3.57832	0.211632	1.22e-24	582	118.048	463.952	NA	329	111.783	217.217	NA	NA	1.32948	1.31855:1.2743:1:1:1:1	0.561856(0.579897:0.438144:0.667526)	NA	NA	NA	NA
A_crys	DIP&CHI	Spe11|Spe33	GMYN	0.512924	3.6504	0.140512	2.66e-15	522	129.957	392.043	NA	242	98.3605	143.639	NA	NA	1.29403	1.45907:1.32437:1:1:1:1	0.490421(0.583333:0.364943:0.522989)	NA	NA	NA	NA
A_crys	DIP&DIP	Spe17|Spe45	GMYN	0.438986	3.55331	0.123543	3.99e-23	522	114.177	407.823	NA	229	95.0316	133.968	NA	NA	1.12018	1.80046:1.6101:1:1:1:1	0.562261(0.614943:0.364943:0.706897)	NA	NA	NA	NA
A_crys	DIP&DIP	Spe16|Spe45	GMYN	0.668363	2.34448	0.285079	4.05e-09	537	146.215	390.785	NA	274	104.848	169.152	NA	NA	1.12474	2.65819:2.92562:1:1:1:1	0.475791(0.541899:0.368715:0.51676)	NA	NA	NA	NA
A_crys	CHI&DIP	Spe41|Spe49	GMYN	0.589064	1.72245	0.341993	1.22e-12	759	247.355	511.645	NA	372	166.853	205.147	NA	NA	0.958428	1.09607:1.67277:1:1:1:1	0.554677(0.687747:0.511858:0.464427)	NA	NA	NA	NA
A_crys	SYM&DIP	Spe07|Spe47	GMYN	0.781118	3.56482	0.219119	1.3e-10	489	115.942	373.058	NA	271	93.4654	177.535	NA	NA	1.44113	2.07961:2.25535:1:1:1:1	0.533742(0.539877:0.40184:0.659509)	NA	NA	NA	NA
A_crys	DIP&DIP	Spe45|Spe47	GMYN	0.624133	2.21083	0.282306	1.72e-05	474	125.783	348.217	NA	226	80.8881	145.112	NA	NA	1.04519	2.21721:2.32267:1:1:1:1	0.531646(0.60443:0.382911:0.607595)	NA	NA	NA	NA
A_crys	SYM&CHI	Spe07|Spe38	GMYN	0.710113	3.50966	0.202331	1.06e-16	489	107.722	381.278	NA	266	94.8682	171.132	NA	NA	1.32682	0.696704:1.72377:1:1:1:1	0.52045(0.555215:0.411043:0.595092)	NA	NA	NA	NA
A_crys	DIP&SYM	Spe45|Spe52	GMYN	0.408115	3.60565	0.113188	2.5e-25	537	122.429	414.571	NA	231	101.953	129.047	NA	NA	1.13711	1.24983:1.44711:1:1:1:1	0.554935(0.634078:0.374302:0.656425)	NA	NA	NA	NA
A_crys	DIP&CHI	Spe11|Spe38	GMYN	0.335362	2.76286	0.121382	1.91e-21	525	134.756	390.244	NA	203	98.5272	104.473	NA	NA	0.958446	1.63586:1.82443:1:1:1:1	0.497143(0.577143:0.385714:0.528571)	NA	NA	NA	NA
A_crys	SYM&DIP	Spe07|Spe42	GMYN	0.731947	3.55104	0.206122	5.55e-19	477	113.832	363.168	NA	268	102.567	165.433	NA	NA	1.4047	1.01075:2.17884:1:1:1:1	0.539832(0.58805:0.399371:0.632075)	NA	NA	NA	NA
A_crys	CHI&DIP	Spe05|Spe46	GMYN	0.844602	3.59597	0.234874	5.16e-21	558	120.86	437.14	NA	330	112.936	217.064	NA	NA	1.44053	1.3163:2.08986:1:1:1:1	0.560932(0.612903:0.403226:0.666667)	NA	NA	NA	NA
A_crys	DIP&CHI	Spe16|Spe32	GMYN	0.489327	3.57615	0.136831	7.1e-23	504	117.707	386.293	NA	237	100.064	136.936	NA	NA	1.21024	1.30118:1.87202:1:1:1:1	0.46131(0.559524:0.389881:0.434524)	NA	NA	NA	NA
A_crys	DIP&DIP	Spe16|Spe17	GMYN	0.337203	3.50267	0.0962702	0	504	106.722	397.278	NA	219	112.101	106.899	NA	NA	1.00749	1.51219:1.37924:1:1:1:1	0.532738(0.556548:0.372024:0.669643)	NA	NA	NA	NA
A_crys	CHI&DIP	Spe01|Spe47	GMYN	0.883521	3.66745	0.240909	3.26e-10	534	132.945	401.055	NA	311	107.186	203.814	NA	NA	1.57661	1.19496:2.05751:1:1:1:1	0.511236(0.581461:0.412921:0.539326)	NA	NA	NA	NA
A_crys	CHI&CHI	Spe33|Spe41	GMYN	0.500011	3.62681	0.137865	4.46e-37	537	125.933	411.067	NA	268	120.006	147.994	NA	NA	1.23329	1.11788:1.31853:1:1:1:1	0.528864(0.558659:0.421788:0.606145)	NA	NA	NA	NA
A_crys	DIP&DIP	Spe17|Spe46	GMYN	0.126253	3.18014	0.0397006	0	543	69.4207	473.579	NA	126	71.2558	54.7442	NA	NA	0.516682	0.797226:1.45957:1:1:1:1	0.639963(0.649171:0.39779:0.872928)	NA	NA	NA	NA
A_crys	SYM&DIP	Spe08|Spe17	GMYN	0.375575	3.51577	0.106826	2.9e-43	543	108.602	434.398	NA	232	105.11	126.89	NA	NA	1.00363	1.08322:1.16535:1:1:1:1	0.554328(0.596685:0.372928:0.69337)	NA	NA	NA	NA
A_crys	DIP&DIP	Spe43|Spe48	GMYN	0.715285	3.72813	0.191862	4.28e-24	570	144.148	425.852	NA	324	130.827	193.173	NA	NA	1.47721	1.27424:1.58033:1:1:1:1	0.542982(0.602632:0.484211:0.542105)	NA	NA	NA	NA
A_crys	CHI&CHI	Spe33|Spe39	GMYN	0.887952	3.71968	0.238717	1.48e-17	651	142.534	508.466	NA	382	125.339	256.661	NA	NA	1.50795	0.830774:1.08545:1:1:1:1	0.479263(0.539171:0.419355:0.479263)	NA	NA	NA	NA
A_crys	CHI&CHI	Spe32|Spe38	GMYN	0.363024	3.6325	0.0999379	5.3e-29	546	126.891	419.109	NA	225	105.829	119.171	NA	NA	1.12285	1.00408:1.49905:1:1:1:1	0.480769(0.585165:0.412088:0.445055)	NA	NA	NA	NA
A_crys	CHI&DIP	Spe32|Spe47	GMYN	0.665069	3.63495	0.182965	1.64e-15	483	127.307	355.693	NA	260	105.884	154.116	NA	NA	1.44786	1.62536:2.34369:1:1:1:1	0.521739(0.624224:0.419255:0.521739)	NA	NA	NA	NA
A_crys	CHI&DIP	Spe33|Spe46	GMYN	0.628719	3.65833	0.171859	3.51e-37	627	131.339	495.661	NA	336	128.271	207.729	NA	NA	1.26334	1.11984:1.46862:1:1:1:1	0.551037(0.590909:0.399522:0.662679)	NA	NA	NA	NA
A_crys	CHI&CHI	Spe01|Spe05	GMYN	0.810512	3.59788	0.225275	5.25e-19	585	121.167	463.833	NA	334	109.87	224.13	NA	NA	1.38784	1.00188:1.38293:1:1:1:1	0.45812(0.523077:0.405128:0.446154)	NA	NA	NA	NA
A_crys	CHI&CHI	Spe35|Spe37	GMYN	0.794741	3.57793	0.222123	2.31e-13	534	117.988	416.012	NA	299	99.3206	199.679	NA	NA	1.40969	1.1139:1.45967:1:1:1:1	0.48221(0.547753:0.370787:0.52809)	NA	NA	NA	NA
A_crys	CHI&CHI	Spe32|Spe40	GMYN	0.569949	3.50302	0.162702	2.35e-23	489	106.772	382.228	NA	246	96.314	149.686	NA	NA	1.21038	0.895212:1.27271:1:1:1:1	0.47955(0.579755:0.42638:0.432515)	NA	NA	NA	NA
A_crys	DIP&PAU	Spe12|Spe51	GMYN	0.784221	2.40892	0.325549	1.5e-05	438	102.664	335.336	NA	234	73.8967	160.103	NA	NA	1.16504	1.57063:1.96256:1:1:1:1	0.513699(0.534247:0.359589:0.64726)	NA	NA	NA	NA
A_crys	CHI&SYM	Spe31|Spe52	GMYN	0.461252	3.68644	0.125121	7.99e-26	579	136.354	442.646	NA	265	114.243	150.757	NA	NA	1.22078	1.45197:1.23774:1:1:1:1	0.562176(0.603627:0.427461:0.65544)	NA	NA	NA	NA
A_crys	DIP&CHI	Spe15|Spe34	GMYN	0.692024	1.59126	0.434891	1.9e-05	528	120.691	407.309	NA	259	79.6712	179.329	NA	NA	0.897572	0.805923:2.33873:1:1:1:1	0.482008(0.551136:0.377841:0.517045)	NA	NA	NA	NA
A_crys	CHI&DIP	Spe40|Spe45	GMYN	0.803384	3.64986	0.220113	2.77e-11	555	129.864	425.136	NA	308	104.192	203.808	NA	NA	1.46943	0.866384:1.83878:1:1:1:1	0.499099(0.583784:0.413514:0.5)	NA	NA	NA	NA
A_crys	SYM&CHI	Spe07|Spe41	GMYN	0.602004	3.48903	0.172542	3.12e-16	507	104.799	402.201	NA	252	88.0031	163.997	NA	NA	1.19877	1.45149:1.56246:1:1:1:1	0.557199(0.544379:0.414201:0.713018)	NA	NA	NA	NA
A_crys	CHI&CHI	Spe05|Spe31	GMYN	0.625205	3.67723	0.17002	8.95e-14	570	134.69	435.31	NA	286	104.392	181.608	NA	NA	1.3464	1.22457:1.71858:1:1:1:1	0.498246(0.557895:0.413158:0.523684)	NA	NA	NA	NA
A_crys	DIP&DIP	Spe12|Spe13	GMYN	0.676057	3.65479	0.184978	2.75e-15	558	130.72	427.28	NA	292	106.761	185.239	NA	NA	1.37387	0.572031:1.78166:1:1:1:1	0.491935(0.55914:0.408602:0.508065)	NA	NA	NA	NA
A_crys	DIP&DIP	Spe17|Spe47	GMYN	0.479528	3.29979	0.145321	1.13e-26	459	81.4277	377.572	NA	209	77.145	131.855	NA	NA	0.979848	1.06755:2.30349:1:1:1:1	0.586057(0.604575:0.385621:0.767974)	NA	NA	NA	NA
A_crys	SYM&SYM	Spe09|Spe52	GMYN	0.585417	3.48082	0.168184	3.85e-20	534	103.658	430.342	NA	263	91.1577	171.842	NA	NA	1.14746	0.956149:1.84818:1:1:1:1	0.537453(0.55618:0.376404:0.679775)	NA	NA	NA	NA
A_crys	CHI&CHI	Spe01|Spe35	GMYN	0.879234	3.73659	0.235304	2.34e-12	624	145.783	478.217	NA	362	119.976	242.024	NA	NA	1.54679	1.61373:1.55647:1:1:1:1	0.487981(0.552885:0.375:0.536058)	NA	NA	NA	NA
A_crys	CHI&DIP	Spe32|Spe49	GMYN	0.333157	3.68122	0.0905018	9.2e-36	588	135.408	452.592	NA	236	115.562	120.438	NA	NA	1.10417	0.790545:1.62891:1:1:1:1	0.47534(0.612245:0.436224:0.377551)	NA	NA	NA	NA
A_crys	DIP&DIP	Spe12|Spe47	GMYN	0.531151	2.64968	0.200458	1.31e-09	459	108.007	350.993	NA	208	76.164	131.836	NA	NA	1.02966	1.19846:1.44257:1:1:1:1	0.541394(0.604575:0.392157:0.627451)	NA	NA	NA	NA
A_crys	CHI&CHI	Spe05|Spe41	GMYN	0.676806	3.58072	0.189014	9.75e-17	528	118.426	409.574	NA	279	100.645	178.355	NA	NA	1.32813	0.464357:1.56583:1:1:1:1	0.523674(0.571023:0.426136:0.573864)	NA	NA	NA	NA
A_crys	DIP&CHI	Spe16|Spe41	GMYN	0.58978	3.50977	0.168039	9.85e-24	486	107.738	378.262	NA	251	98.9508	152.049	NA	NA	1.23709	1.18707:1.91578:1:1:1:1	0.51749(0.546296:0.385802:0.62037)	NA	NA	NA	NA
A_crys	DIP&DIP	Spe14|Spe50	GMYN	0.231935	3.46922	0.0668551	1.84e-42	519	102.066	416.934	NA	175	92.5461	82.4539	NA	NA	0.868576	1.06317:1.99252:1:1:1:1	0.590559(0.627168:0.407514:0.736994)	NA	NA	NA	NA
A_crys	CHI&SYM	Spe04|Spe07	GMYN	0.670869	3.43019	0.195578	2.83e-17	465	96.8904	368.11	NA	245	86.1377	158.862	NA	NA	1.24582	0.471576:1.66563:1:1:1:1	0.55914(0.558065:0.43871:0.680645)	NA	NA	NA	NA
A_crys	DIP&DIP	Spe47|Spe48	GMYN	0.646328	3.64649	0.177247	3.05e-17	492	129.281	362.719	NA	263	108.399	154.601	NA	NA	1.43467	1.54424:2.03818:1:1:1:1	0.523374(0.612805:0.42378:0.533537)	NA	NA	NA	NA
A_crys	CHI&CHI	Spe03|Spe40	GMYN	0.804702	3.57243	0.225253	1.48e-19	579	117.125	461.875	NA	327	106.659	220.341	NA	NA	1.36458	0.618187:1.78782:1:1:1:1	0.468912(0.544041:0.414508:0.448187)	NA	NA	NA	NA
A_crys	CHI&CHI	Spe33|Spe40	GMYN	0.850512	3.60839	0.235704	1.52e-13	555	122.877	432.123	NA	314	103.919	210.081	NA	NA	1.4611	0.522321:1.53719:1:1:1:1	0.492793(0.575676:0.435135:0.467568)	NA	NA	NA	NA
A_crys	CHI&DIP	Spe02|Spe44	GMYN	0.643092	3.54527	0.181394	2.57e-14	486	112.96	373.04	NA	251	92.8609	158.139	NA	NA	1.31764	1.32607:1.54227:1:1:1:1	0.461934(0.561728:0.361111:0.462963)	NA	NA	NA	NA
A_crys	DIP&DIP	Spe43|Spe47	GMYN	0.848776	3.60752	0.23528	2.4e-12	498	122.735	375.265	NA	291	103.68	187.32	NA	NA	1.52868	1.22072:1.41388:1:1:1:1	0.577309(0.611446:0.466867:0.653614)	NA	NA	NA	NA
A_crys	CHI&CHI	Spe37|Spe39	GMYN	0.788148	3.67809	0.214282	6.96e-10	591	134.844	456.156	NA	321	103.951	217.049	NA	NA	1.44752	1.43179:1.67374:1:1:1:1	0.465313(0.530457:0.393401:0.472081)	NA	NA	NA	NA
A_crys	CHI&DIP	Spe05|Spe42	GMYN	0.553497	3.63677	0.152195	3.99e-18	534	127.616	406.384	NA	260	103.752	156.248	NA	NA	1.29034	0.989156:1.75015:1:1:1:1	0.492509(0.575843:0.404494:0.497191)	NA	NA	NA	NA
A_crys	DIP&PAU	Spe13|Spe51	GMYN	0.87343	3.60596	0.242218	7.16e-09	540	122.48	417.52	NA	306	96.5621	209.438	NA	NA	1.49321	0.692121:1.73573:1:1:1:1	0.473148(0.508333:0.372222:0.538889)	NA	NA	NA	NA
A_crys	CHI&CHI	Spe33|Spe35	GMYN	0.324312	1.39135	0.233093	9.17e-16	567	145.979	421.021	NA	202	92.3574	109.643	NA	NA	0.599029	1.92228:2.08053:1:1:1:1	0.493827(0.57672:0.357143:0.547619)	NA	NA	NA	NA
A_crys	CHI&DIP	Spe04|Spe47	GMYN	0.688957	5.49976	0.12527	3.5e-09	489	112.079	376.921	NA	251	84.0045	166.995	NA	NA	1.7916	1.08626:1.62385:1:1:1:1	0.559305(0.610429:0.41411:0.653374)	NA	NA	NA	NA
A_crys	PAU&CHI	Spe10|Spe36	GMYN	0.836702	3.61848	0.23123	3.1e-09	555	124.541	430.459	NA	309	97.187	211.813	NA	NA	1.46093	0.965559:1.63052:1:1:1:1	0.471171(0.572973:0.427027:0.413514)	NA	NA	NA	NA
A_crys	DIP&CHI	Spe15|Spe40	GMYN	0.563419	3.59333	0.156796	5.56e-17	510	120.434	389.566	NA	250	98.3132	151.687	NA	NA	1.27892	1.20352:1.39011:1:1:1:1	0.496078(0.597059:0.411765:0.479412)	NA	NA	NA	NA
A_crys	CHI&DIP	Spe39|Spe49	GMYN	0.72334	3.60518	0.200639	8.83e-13	546	122.352	423.648	NA	290	98.8189	191.181	NA	NA	1.36912	1.37723:1.9055:1:1:1:1	0.453297(0.543956:0.381868:0.434066)	NA	NA	NA	NA
A_crys	CHI&DIP	Spe02|Spe47	GMYN	0.813825	3.5915	0.226597	1.03e-17	474	120.142	353.858	NA	281	108.368	172.632	NA	NA	1.51786	1.50201:1.45062:1:1:1:1	0.491561(0.572785:0.382911:0.518987)	NA	NA	NA	NA
A_crys	CHI&CHI	Spe31|Spe36	GMYN	0.424904	3.74553	0.113443	1.45e-31	588	147.531	440.469	NA	268	126.758	141.242	NA	NA	1.25806	1.21809:1.57415:1:1:1:1	0.505952(0.579082:0.454082:0.484694)	NA	NA	NA	NA
A_crys	CHI&SYM	Spe02|Spe08	GMYN	0.637532	3.48713	0.182824	9.43e-23	492	104.533	387.467	NA	259	96.4318	162.568	NA	NA	1.24297	0.851491:1.25383:1:1:1:1	0.465447(0.557927:0.353659:0.484756)	NA	NA	NA	NA
A_crys	CHI&DIP	Spe34|Spe48	GMYN	0.763066	3.59419	0.212306	3.06e-12	549	120.572	428.428	NA	296	97.7484	198.252	NA	NA	1.38484	0.63439:2.45327:1:1:1:1	0.460838(0.554645:0.377049:0.45082)	NA	NA	NA	NA
A_crys	CHI&DIP	Spe01|Spe45	GMYN	0.650261	3.68225	0.176593	1.06e-11	576	135.595	440.405	NA	291	102.567	188.433	NA	NA	1.36402	1.2785:1.31427:1:1:1:1	0.496528(0.575521:0.40625:0.507812)	NA	NA	NA	NA
A_crys	CHI&CHI	Spe01|Spe37	GMYN	0.340622	0.855212	0.398289	2.23e-05	711	156.729	554.271	NA	220	70.2769	149.723	NA	NA	0.454055	1.37006:1.65338:1:1:1:1	0.462025(0.550633:0.388186:0.447257)	NA	NA	NA	NA
A_crys	SYM&CHI	Spe07|Spe40	GMYN	0.717361	3.60246	0.199131	1.88e-10	498	121.91	376.09	NA	264	94.7595	169.24	NA	NA	1.42363	1.50436:2.63678:1:1:1:1	0.521084(0.554217:0.415663:0.593373)	NA	NA	NA	NA
A_crys	CHI&SYM	Spe02|Spe52	GMYN	0.72895	3.52735	0.206657	2.01e-21	492	110.292	381.708	NA	277	102.506	174.494	NA	NA	1.35627	1.34708:1.52756:1:1:1:1	0.486789(0.557927:0.353659:0.54878)	NA	NA	NA	NA
A_crys	SYM&PAU	Spe09|Spe10	GMYN	0.862017	3.45813	0.249273	1.02e-15	492	100.569	391.431	NA	288	91.6155	196.385	NA	NA	1.39268	1.01539:1.13404:1:1:1:1	0.489837(0.506098:0.390244:0.573171)	NA	NA	NA	NA
A_crys	CHI&CHI	Spe01|Spe38	GMYN	0.702331	3.57142	0.196653	9.75e-23	543	116.967	426.033	NA	298	107.591	190.409	NA	NA	1.32036	0.869374:1.02009:1:1:1:1	0.489871(0.560773:0.41989:0.48895)	NA	NA	NA	NA
A_crys	CHI&CHI	Spe02|Spe37	GMYN	0.930725	2.7377	0.339966	0.00801983	582	137.998	444.002	NA	321	89.8785	231.121	NA	NA	1.35918	2.01284:1.70328:1:1:1:1	0.445017(0.548969:0.358247:0.427835)	NA	NA	NA	NA
A_crys	DIP&DIP	Spe14|Spe43	GMYN	0.714095	3.6385	0.196261	2.23e-10	510	127.911	382.089	NA	272	98.7653	173.235	NA	NA	1.44755	1.93732:2.15891:1:1:1:1	0.581373(0.629412:0.452941:0.661765)	NA	NA	NA	NA
A_crys	DIP&DIP	Spe12|Spe17	GMYN	0.392297	3.4163	0.114831	0	540	95.1126	444.887	NA	232	98.516	133.484	NA	NA	0.924927	0.587929:0.851523:1:1:1:1	0.569444(0.602778:0.380556:0.725)	NA	NA	NA	NA
A_crys	CHI&CHI	Spe38|Spe39	GMYN	0.638415	3.46979	0.183993	2.39e-21	501	102.144	398.856	NA	261	93.465	167.535	NA	NA	1.21568	0.688421:0.877051:1:1:1:1	0.482036(0.547904:0.407186:0.491018)	NA	NA	NA	NA
A_crys	CHI&DIP	Spe02|Spe13	GMYN	0.633967	3.45212	0.183646	4.64e-15	507	99.7661	407.234	NA	254	83.9594	170.041	NA	NA	1.18852	0.748566:1.1876:1:1:1:1	0.434911(0.535503:0.363905:0.405325)	NA	NA	NA	NA
A_crys	CHI&DIP	Spe05|Spe45	GMYN	0.614547	3.5913	0.171121	9.82e-20	513	120.109	392.891	NA	265	103.863	161.137	NA	NA	1.3115	0.868798:2.14765:1:1:1:1	0.495127(0.576023:0.380117:0.52924)	NA	NA	NA	NA
A_crys	CHI&DIP	Spe37|Spe42	GMYN	0.690727	3.59219	0.192286	3.91e-14	528	120.251	407.749	NA	279	98.5835	180.417	NA	NA	1.35153	0.968096:1.18729:1:1:1:1	0.499053(0.582386:0.403409:0.511364)	NA	NA	NA	NA
A_crys	CHI&PAU	Spe05|Spe51	GMYN	0.865773	3.53313	0.245044	1.43e-22	537	111.145	425.855	NA	320	106.881	213.119	NA	NA	1.41785	0.913448:2.00351:1:1:1:1	0.472067(0.50838:0.351955:0.555866)	NA	NA	NA	NA
A_crys	DIP&CHI	Spe14|Spe34	GMYN	0.621514	3.56322	0.174425	9.76e-13	516	115.695	400.305	NA	256	90.0055	165.995	NA	NA	1.28109	0.927475:1.66906:1:1:1:1	0.508721(0.572674:0.369186:0.584302)	NA	NA	NA	NA
A_crys	CHI&CHI	Spe36|Spe40	GMYN	0.569949	3.50302	0.162702	2.35e-23	489	106.772	382.228	NA	246	96.314	149.686	NA	NA	1.21038	0.895212:1.27271:1:1:1:1	0.47955(0.579755:0.42638:0.432515)	NA	NA	NA	NA
A_crys	DIP&DIP	Spe45|Spe48	GMYN	0.433335	3.6618	0.118339	4.06e-27	549	131.947	417.053	NA	247	111.761	135.239	NA	NA	1.20926	0.964262:1.56094:1:1:1:1	0.501821(0.617486:0.401639:0.486339)	NA	NA	NA	NA
A_crys	SYM&DIP	Spe07|Spe14	GMYN	0.61501	3.37108	0.182437	9.62e-22	456	89.5476	366.452	NA	234	83.461	150.539	NA	NA	1.15624	0.700634:1.87722:1:1:1:1	0.555921(0.595395:0.371711:0.700658)	NA	NA	NA	NA
A_crys	CHI&DIP	Spe37|Spe43	GMYN	0.933188	3.70324	0.251992	2.97e-12	582	139.443	442.557	NA	350	117.794	232.206	NA	NA	1.59687	1.34407:1.26391:1:1:1:1	0.52921(0.579897:0.451031:0.556701)	NA	NA	NA	NA
A_crys	SYM&CHI	Spe08|Spe37	GMYN	0.701097	3.50879	0.199811	9.06e-14	534	107.597	426.403	NA	280	89.8872	190.113	NA	NA	1.26683	0.906141:0.679742:1:1:1:1	0.476592(0.570225:0.348315:0.511236)	NA	NA	NA	NA
A_crys	CHI&DIP	Spe03|Spe11	GMYN	0.488602	3.62958	0.134616	1.1e-31	552	126.399	425.601	NA	266	115.862	150.138	NA	NA	1.20784	0.785252:1.99953:1:1:1:1	0.476449(0.565217:0.388587:0.475543)	NA	NA	NA	NA
A_crys	DIP&DIP	Spe11|Spe14	GMYN	0.267271	3.63	0.0736283	5.5e-34	522	126.469	395.531	NA	192	103.798	88.2023	NA	NA	1.08199	1.30013:1.5046:1:1:1:1	0.533525(0.609195:0.385057:0.606322)	NA	NA	NA	NA
A_crys	DIP&CHI	Spe16|Spe40	GMYN	0.841602	3.59639	0.234013	2.76e-09	522	120.927	401.073	NA	293	95.5068	197.493	NA	NA	1.47978	1.19136:2.18012:1:1:1:1	0.475096(0.54023:0.399425:0.485632)	NA	NA	NA	NA
A_crys	CHI&DIP	Spe32|Spe45	GMYN	0.395798	3.63894	0.108767	1.31e-29	537	127.986	409.014	NA	234	109.947	124.053	NA	NA	1.16875	0.831785:1.52857:1:1:1:1	0.498138(0.622905:0.396648:0.47486)	NA	NA	NA	NA
A_crys	CHI&DIP	Spe37|Spe46	GMYN	0.805218	3.45183	0.233273	9.61e-36	549	99.7279	449.272	NA	320	103.058	216.942	NA	NA	1.28599	0.832431:1.04786:1:1:1:1	0.555556(0.601093:0.393443:0.672131)	NA	NA	NA	NA
A_crys	CHI&DIP	Spe01|Spe15	GMYN	0.700843	3.56583	0.196544	1.96e-21	525	116.098	408.902	NA	288	105.633	182.367	NA	NA	1.33441	0.87331:1.12597:1:1:1:1	0.502857(0.582857:0.428571:0.497143)	NA	NA	NA	NA
A_crys	CHI&DIP	Spe36|Spe45	GMYN	0.395798	3.63894	0.108767	1.31e-29	537	127.986	409.014	NA	234	109.947	124.053	NA	NA	1.16875	0.831785:1.52857:1:1:1:1	0.498138(0.622905:0.396648:0.47486)	NA	NA	NA	NA
A_crys	DIP&DIP	Spe17|Spe44	GMYN	0.382591	3.63381	0.105286	6.29e-34	540	127.114	412.886	NA	235	112.626	122.374	NA	NA	1.14792	1.62281:1.92001:1:1:1:1	0.549074(0.597222:0.386111:0.663889)	NA	NA	NA	NA
A_crys	DIP&DIP	Spe13|Spe17	GMYN	0.579572	3.60011	0.160987	2.49e-18	540	121.528	418.472	NA	267	101.009	165.991	NA	NA	1.25935	0.838688:1.53144:1:1:1:1	0.530556(0.569444:0.411111:0.611111)	NA	NA	NA	NA
A_crys	CHI&PAU	Spe39|Spe51	GMYN	0.890271	3.49426	0.254781	1.91e-11	495	105.532	389.468	NA	285	89.4119	195.588	NA	NA	1.44543	0.764154:2.25297:1:1:1:1	0.482828(0.521212:0.348485:0.578788)	NA	NA	NA	NA
A_crys	CHI&DIP	Spe33|Spe44	GMYN	0.503447	3.59851	0.139904	1.28e-19	519	121.269	397.731	NA	243	99.4948	143.505	NA	NA	1.22664	0.92295:1.29294:1:1:1:1	0.479769(0.578035:0.361272:0.5)	NA	NA	NA	NA
A_crys	SYM&DIP	Spe07|Spe50	GMYN	0.537333	3.26185	0.164732	0	450	77.4115	372.589	NA	218	77.1213	140.879	NA	NA	1.00602	0.962091:1.44769:1:1:1:1	0.582222(0.546667:0.43:0.77)	NA	NA	NA	NA
A_crys	CHI&DIP	Spe03|Spe47	GMYN	0.72807	3.60245	0.202104	1.65e-10	492	121.908	370.092	NA	265	95.6862	169.314	NA	NA	1.44029	1.20317:2.04576:1:1:1:1	0.5(0.567073:0.405488:0.527439)	NA	NA	NA	NA
A_crys	CHI&DIP	Spe31|Spe42	GMYN	0.407987	3.70991	0.109972	1.6e-25	552	140.687	411.313	NA	242	113.997	128.003	NA	NA	1.24954	1.35634:1.64228:1:1:1:1	0.538043(0.589674:0.440217:0.584239)	NA	NA	NA	NA
A_crys	CHI&DIP	Spe03|Spe14	GMYN	0.458406	3.60015	0.12733	4.05e-24	522	121.535	400.465	NA	238	102.822	135.178	NA	NA	1.18988	0.875274:2.06638:1:1:1:1	0.497126(0.568966:0.399425:0.522989)	NA	NA	NA	NA
A_crys	CHI&CHI	Spe01|Spe34	GMYN	0.841847	3.61441	0.232914	1.71e-47	651	123.868	527.132	NA	390	130.308	259.692	NA	NA	1.36939	0.712697:0.694116:1:1:1:1	0.460061(0.52765:0.380184:0.47235)	NA	NA	NA	NA
A_crys	CHI&SYM	Spe34|Spe52	GMYN	0.629923	3.58235	0.17584	2.66e-14	522	118.685	403.315	NA	264	95.7365	168.264	NA	NA	1.3012	0.821135:2.15331:1:1:1:1	0.501916(0.566092:0.359195:0.58046)	NA	NA	NA	NA
A_crys	CHI&CHI	Spe34|Spe41	GMYN	0.658084	3.65131	0.180232	5.98e-14	543	130.115	412.885	NA	281	103.779	177.221	NA	NA	1.37533	0.815702:1.74526:1:1:1:1	0.511971(0.585635:0.375691:0.574586)	NA	NA	NA	NA
A_crys	CHI&DIP	Spe33|Spe45	GMYN	0.667843	3.699	0.180547	2.02e-16	564	138.657	425.343	NA	299	114.161	184.839	NA	NA	1.41304	1.15151:1.67995:1:1:1:1	0.49734(0.571809:0.398936:0.521277)	NA	NA	NA	NA
A_crys	CHI&CHI	Spe02|Spe04	GMYN	0.668958	3.53295	0.189348	2.63e-11	465	111.12	353.88	NA	241	87.7711	153.229	NA	NA	1.35336	1.47957:2.02774:1:1:1:1	0.486022(0.551613:0.358065:0.548387)	NA	NA	NA	NA
A_crys	DIP&DIP	Spe15|Spe42	GMYN	0.278766	3.7041	0.0752588	1.84e-33	549	139.603	409.397	NA	206	111.96	94.0398	NA	NA	1.14978	0.978095:2.80246:1:1:1:1	0.518215(0.60929:0.401639:0.543716)	NA	NA	NA	NA
A_crys	CHI&DIP	Spe32|Spe44	GMYN	0.274993	3.6442	0.0754605	1.61e-34	549	128.886	420.114	NA	201	105.329	95.6712	NA	NA	1.06597	0.846558:1.35383:1:1:1:1	0.480874(0.590164:0.418033:0.434426)	NA	NA	NA	NA
A_crys	DIP&DIP	Spe42|Spe46	GMYN	0.397135	3.54497	0.112028	2.27e-39	525	112.914	412.086	NA	233	107.652	125.348	NA	NA	1.07416	0.88626:1.961:1:1:1:1	0.604762(0.66:0.422857:0.731429)	NA	NA	NA	NA
A_crys	SYM&CHI	Spe07|Spe32	GMYN	0.685945	3.58586	0.191291	2.02e-16	504	119.242	384.758	NA	272	101.938	170.062	NA	NA	1.37204	1.1879:1.41545:1:1:1:1	0.503968(0.53869:0.425595:0.547619)	NA	NA	NA	NA
A_crys	DIP&DIP	Spe14|Spe44	GMYN	0.236717	3.63948	0.0650415	8.15e-37	519	128.077	390.923	NA	183	104.263	78.7375	NA	NA	1.07644	1.2104:1.56218:1:1:1:1	0.525048(0.609827:0.381503:0.583815)	NA	NA	NA	NA
A_crys	DIP&DIP	Spe12|Spe15	GMYN	0.297816	3.66129	0.0813418	1.67e-37	555	131.858	423.142	NA	215	112.144	102.856	NA	NA	1.09692	1.09135:1.82819:1:1:1:1	0.516216(0.594595:0.389189:0.564865)	NA	NA	NA	NA
A_crys	CHI&DIP	Spe04|Spe15	GMYN	0.445532	3.69907	0.120444	1.32e-22	573	138.669	434.331	NA	255	110.926	144.074	NA	NA	1.2329	1.2202:1.48982:1:1:1:1	0.545375(0.615183:0.426702:0.594241)	NA	NA	NA	NA
A_crys	DIP&SYM	Spe43|Spe52	GMYN	0.672682	3.59186	0.18728	6.95e-27	531	120.199	410.801	NA	293	113.41	179.59	NA	NA	1.33348	1.32467:1.48458:1:1:1:1	0.595104(0.641243:0.463277:0.680791)	NA	NA	NA	NA
A_crys	CHI&DIP	Spe01|Spe49	GMYN	0.85386	3.85366	0.221571	1.09e-19	747	170.412	576.588	NA	434	147.709	286.291	NA	NA	1.5382	0.739932:1.20201:1:1:1:1	0.481258(0.594378:0.445783:0.403614)	NA	NA	NA	NA
A_crys	DIP&DIP	Spe16|Spe50	GMYN	0.480097	3.51757	0.136485	0	513	108.864	404.136	NA	257	115.492	141.508	NA	NA	1.12468	1.16583:1.15029:1:1:1:1	0.538986(0.564327:0.400585:0.652047)	NA	NA	NA	NA
A_crys	CHI&DIP	Spe38|Spe50	GMYN	0.377926	3.57763	0.105636	2.66e-31	546	117.939	428.061	NA	229	103.31	125.69	NA	NA	1.06908	1.07412:1.34093:1:1:1:1	0.555861(0.601648:0.412088:0.653846)	NA	NA	NA	NA
A_crys	CHI&DIP	Spe01|Spe14	GMYN	0.753303	3.53034	0.21338	1.4e-16	522	110.732	411.268	NA	289	97.6696	191.33	NA	NA	1.3424	0.897321:1.08489:1:1:1:1	0.515326(0.58908:0.387931:0.568966)	NA	NA	NA	NA
A_crys	SYM&DIP	Spe07|Spe46	GMYN	0.63215	3.46141	0.182628	1e-25	582	101.01	480.99	NA	298	95.9112	202.089	NA	NA	1.12319	1.16537:1.85767:1:1:1:1	0.588488(0.564433:0.42268:0.778351)	NA	NA	NA	NA
A_crys	DIP&CHI	Spe11|Spe31	GMYN	0.443328	2.32563	0.190627	2.17e-15	543	138.427	404.573	NA	233	99.147	133.853	NA	NA	0.923182	1.8857:1.16702:1:1:1:1	0.52302(0.574586:0.40884:0.585635)	NA	NA	NA	NA
A_crys	CHI&DIP	Spe37|Spe45	GMYN	0.712103	3.53348	0.20153	2.45e-13	543	111.198	431.802	NA	286	91.716	194.284	NA	NA	1.28988	0.679077:1.15366:1:1:1:1	0.488029(0.59116:0.367403:0.505525)	NA	NA	NA	NA
A_crys	DIP&DIP	Spe17|Spe48	GMYN	0.446628	3.58022	0.124749	4.4e-44	540	118.348	421.652	NA	256	116.062	139.938	NA	NA	1.1334	0.940321:1.63919:1:1:1:1	0.539815(0.602778:0.397222:0.619444)	NA	NA	NA	NA
A_crys	DIP&CHI	Spe16|Spe36	GMYN	0.489327	3.57615	0.136831	7.1e-23	504	117.707	386.293	NA	237	100.064	136.936	NA	NA	1.21024	1.30118:1.87202:1:1:1:1	0.46131(0.559524:0.389881:0.434524)	NA	NA	NA	NA
A_crys	SYM&DIP	Spe08|Spe42	GMYN	0.288684	3.6615	0.0788431	2.54e-45	537	131.894	405.106	NA	215	119.002	95.9982	NA	NA	1.11709	0.880915:1.64931:1:1:1:1	0.518622(0.600559:0.393855:0.561453)	NA	NA	NA	NA
A_crys	PAU&CHI	Spe10|Spe38	GMYN	0.868348	3.51403	0.247109	1.51e-17	531	108.351	422.649	NA	309	99.1465	209.854	NA	NA	1.4082	0.598088:1.20761:1:1:1:1	0.477401(0.542373:0.40678:0.483051)	NA	NA	NA	NA
A_crys	DIP&DIP	Spe42|Spe47	GMYN	0.642338	2.14202	0.299875	3.91e-08	483	129.989	353.011	NA	242	91.8866	150.113	NA	NA	1.04595	1.49799:1.82802:1:1:1:1	0.544513(0.614907:0.431677:0.586957)	NA	NA	NA	NA
A_crys	CHI&CHI	Spe01|Spe32	GMYN	0.678875	3.60753	0.188183	2.15e-21	561	122.736	438.264	NA	302	109.728	192.272	NA	NA	1.31961	1.03696:1.08251:1:1:1:1	0.468806(0.553476:0.446524:0.406417)	NA	NA	NA	NA
A_crys	CHI&CHI	Spe36|Spe38	GMYN	0.363024	3.6325	0.0999379	5.3e-29	546	126.891	419.109	NA	225	105.829	119.171	NA	NA	1.12285	1.00408:1.49905:1:1:1:1	0.480769(0.585165:0.412088:0.445055)	NA	NA	NA	NA
A_crys	CHI&PAU	Spe03|Spe51	GMYN	1.09252	3.64855	0.299441	1.78e-06	561	129.636	431.364	NA	345	102.279	242.721	NA	NA	1.68317	1.32385:1.76219:1:1:1:1	0.467914(0.489305:0.368984:0.545455)	NA	NA	NA	NA
A_crys	DIP&DIP	Spe49|Spe50	GMYN	0.392877	3.67459	0.106917	1.1e-37	540	134.216	405.784	NA	245	122.327	122.673	NA	NA	1.20854	1.49787:2.12656:1:1:1:1	0.542593(0.616667:0.413889:0.597222)	NA	NA	NA	NA
A_crys	CHI&CHI	Spe33|Spe34	GMYN	0.693662	3.65768	0.189645	2.81e-17	606	131.224	474.776	NA	320	110.501	209.499	NA	NA	1.3355	0.73616:1.44195:1:1:1:1	0.463696(0.549505:0.366337:0.475248)	NA	NA	NA	NA
A_crys	DIP&CHI	Spe14|Spe36	GMYN	0.251431	3.61749	0.0695042	6.04e-44	516	124.378	391.622	NA	193	110.192	82.8079	NA	NA	1.0628	0.883373:2.26419:1:1:1:1	0.513566(0.616279:0.40407:0.520349)	NA	NA	NA	NA
A_crys	CHI&DIP	Spe05|Spe15	GMYN	0.690696	1.60587	0.430106	7.71e-06	549	136.532	412.468	NA	273	90.3654	182.635	NA	NA	0.918294	1.62562:2.21339:1:1:1:1	0.489071(0.576503:0.398907:0.491803)	NA	NA	NA	NA
A_crys	DIP&DIP	Spe12|Spe16	GMYN	0.510361	3.58622	0.142312	9.08e-15	510	119.298	390.702	NA	234	91.2798	142.72	NA	NA	1.22986	1.38957:1.59311:1:1:1:1	0.489216(0.544118:0.373529:0.55)	NA	NA	NA	NA
A_crys	CHI&DIP	Spe05|Spe11	GMYN	0.584657	3.47988	0.168011	5.55e-12	528	125.268	402.732	NA	254	93.0436	160.956	NA	NA	1.27155	1.30726:1.69379:1:1:1:1	0.47822(0.5625:0.375:0.497159)	NA	NA	NA	NA
A_crys	CHI&DIP	Spe41|Spe42	GMYN	0.365733	3.65092	0.100176	2.94e-24	510	130.047	379.953	NA	211	102.451	108.549	NA	NA	1.20343	1.48254:2.43516:1:1:1:1	0.551961(0.602941:0.411765:0.641176)	NA	NA	NA	NA
A_crys	CHI&CHI	Spe37|Spe41	GMYN	0.947379	3.88196	0.244047	7.25e-10	705	176.963	528.037	NA	416	138.224	277.776	NA	NA	1.68399	1.19788:0.972853:1:1:1:1	0.511348(0.604255:0.429787:0.5)	NA	NA	NA	NA
A_crys	CHI&CHI	Spe32|Spe35	GMYN	0.608127	3.65782	0.166254	2.97e-20	546	131.249	414.751	NA	281	111.708	169.292	NA	NA	1.34122	0.886181:2.01271:1:1:1:1	0.489927(0.57967:0.395604:0.494505)	NA	NA	NA	NA
A_crys	DIP&DIP	Spe15|Spe49	GMYN	0.351255	3.68744	0.0952573	5.73e-33	552	136.535	415.465	NA	231	115.722	115.278	NA	NA	1.17645	1.1513:1.44184:1:1:1:1	0.490942(0.608696:0.404891:0.459239)	NA	NA	NA	NA
A_crys	CHI&CHI	Spe34|Spe39	GMYN	0.996248	3.59045	0.277472	1.27e-18	612	119.972	492.028	NA	371	111.196	259.804	NA	NA	1.5048	0.470847:1.25287:1:1:1:1	0.459967(0.512255:0.389706:0.477941)	NA	NA	NA	NA
A_crys	SYM&CHI	Spe08|Spe34	GMYN	0.578447	3.58677	0.161273	9.46e-20	525	119.385	405.615	NA	261	101.404	159.596	NA	NA	1.26254	0.569108:1.69738:1:1:1:1	0.469524(0.554286:0.345714:0.508571)	NA	NA	NA	NA
A_crys	DIP&CHI	Spe17|Spe33	GMYN	0.581082	3.55086	0.163646	5.11e-21	534	113.804	420.196	NA	267	99.7216	167.278	NA	NA	1.21399	1.29136:1.39602:1:1:1:1	0.547753(0.587079:0.379213:0.676966)	NA	NA	NA	NA
A_crys	SYM&PAU	Spe08|Spe51	GMYN	0.656547	3.49212	0.188008	6.64e-23	522	105.232	416.768	NA	276	97.424	178.576	NA	NA	1.22818	0.612778:1.20128:1:1:1:1	0.504789(0.545977:0.353448:0.614943)	NA	NA	NA	NA
A_crys	CHI&CHI	Spe32|Spe37	GMYN	0.92596	3.65521	0.253326	1.84e-13	582	130.792	451.208	NA	348	112.922	235.078	NA	NA	1.5393	1.43025:1.18242:1:1:1:1	0.464777(0.582474:0.407216:0.404639)	NA	NA	NA	NA
A_crys	DIP&DIP	Spe13|Spe50	GMYN	0.689103	3.61959	0.190381	4.1e-26	561	124.726	436.274	NA	309	116.453	192.547	NA	NA	1.34063	0.746629:0.939274:1:1:1:1	0.535651(0.57754:0.417112:0.612299)	NA	NA	NA	NA
A_crys	CHI&DIP	Spe32|Spe48	GMYN	0.0537481	0.115782	0.464219	0.0255451	606	161.465	444.535	NA	40	17	23	NA	NA	0.0702766	2.65123:2.51518:1:1:1:1	0.478548(0.606436:0.433168:0.39604)	NA	NA	NA	NA
A_crys	DIP&SYM	Spe48|Spe52	GMYN	0.372159	3.70488	0.100451	4.7e-26	564	139.748	424.252	NA	234	110.814	123.186	NA	NA	1.19794	1.26899:1.32379:1:1:1:1	0.529255(0.617021:0.409574:0.56117)	NA	NA	NA	NA
A_crys	CHI&CHI	Spe03|Spe31	GMYN	0.613155	3.67076	0.167037	4.25e-21	579	133.533	445.467	NA	298	114.719	183.281	NA	NA	1.31832	0.809978:1.40278:1:1:1:1	0.489637(0.531088:0.432642:0.505181)	NA	NA	NA	NA
A_crys	CHI&DIP	Spe35|Spe44	GMYN	0.516662	3.63166	0.142266	1.31e-15	519	126.749	392.251	NA	242	97.8718	144.128	NA	NA	1.2774	1.23682:2.06027:1:1:1:1	0.495183(0.557803:0.369942:0.557803)	NA	NA	NA	NA
A_crys	DIP&CHI	Spe16|Spe35	GMYN	0.60833	3.52717	0.17247	4.84e-15	474	110.265	363.735	NA	240	90.9862	149.014	NA	NA	1.28733	1.24083:1.94697:1:1:1:1	0.489451(0.525316:0.379747:0.563291)	NA	NA	NA	NA
A_crys	CHI&DIP	Spe01|Spe46	GMYN	0.80577	3.59856	0.223915	1.13e-38	621	121.277	499.723	NA	365	123.188	241.812	NA	NA	1.35118	0.982166:0.754474:1:1:1:1	0.557166(0.589372:0.425121:0.657005)	NA	NA	NA	NA
A_crys	DIP&SYM	Spe16|Spe52	GMYN	0.47334	3.52625	0.134233	4.41e-38	507	110.131	396.869	NA	245	107.437	137.563	NA	NA	1.13649	1.14604:1.54872:1:1:1:1	0.506903(0.556213:0.37574:0.588757)	NA	NA	NA	NA
A_crys	DIP&DIP	Spe15|Spe48	GMYN	0.311322	3.70005	0.0841401	5.94e-37	570	138.85	431.15	NA	226	117.456	108.544	NA	NA	1.1368	1.29294:2.38104:1:1:1:1	0.494737(0.610526:0.405263:0.468421)	NA	NA	NA	NA
A_crys	CHI&CHI	Spe04|Spe37	GMYN	0.796489	3.72318	0.213927	1.24e-19	606	143.2	462.8	NA	350	126.965	223.035	NA	NA	1.48808	1.42358:1.19911:1:1:1:1	0.514026(0.591584:0.405941:0.544554)	NA	NA	NA	NA
A_crys	CHI&CHI	Spe31|Spe32	GMYN	0.420758	3.74607	0.11232	5.54e-32	588	147.637	440.363	NA	267	126.804	140.196	NA	NA	1.25569	1.23048:1.60844:1:1:1:1	0.505102(0.576531:0.454082:0.484694)	NA	NA	NA	NA
A_crys	DIP&DIP	Spe43|Spe45	GMYN	0.728988	3.67065	0.198599	5.61e-15	582	133.513	448.487	NA	316	110.396	205.604	NA	NA	1.40382	1.05624:1.50113:1:1:1:1	0.56701(0.597938:0.471649:0.631443)	NA	NA	NA	NA
A_crys	DIP&DIP	Spe14|Spe48	GMYN	0.29122	3.66815	0.0793914	5.14e-30	519	133.07	385.93	NA	198	105.824	92.1757	NA	NA	1.15705	1.49617:1.85994:1:1:1:1	0.518304(0.627168:0.395954:0.531792)	NA	NA	NA	NA
A_crys	DIP&CHI	Spe11|Spe41	GMYN	0.485887	2.21083	0.219776	2.4e-12	534	122.136	411.864	NA	232	86.7972	145.203	NA	NA	0.880415	1.08497:1.33324:1:1:1:1	0.540262(0.615169:0.379213:0.626404)	NA	NA	NA	NA
A_crys	CHI&CHI	Spe05|Spe34	GMYN	0.674968	3.65715	0.184561	6.63e-13	588	131.132	456.868	NA	301	102.269	198.731	NA	NA	1.34004	1.24168:1.89373:1:1:1:1	0.441327(0.528061:0.354592:0.441327)	NA	NA	NA	NA
A_crys	CHI&DIP	Spe31|Spe47	GMYN	0.70589	3.58926	0.196667	1.08e-09	489	119.783	369.217	NA	258	91.8628	166.137	NA	NA	1.41219	1.21566:1.81532:1:1:1:1	0.55317(0.610429:0.423313:0.625767)	NA	NA	NA	NA
A_crys	DIP&DIP	Spe15|Spe50	GMYN	0.27009	3.55174	0.0760445	3.77e-43	552	113.937	438.063	NA	202	103.646	98.3544	NA	NA	0.947449	0.951516:1.70489:1:1:1:1	0.5625(0.61413:0.404891:0.668478)	NA	NA	NA	NA
A_crys	DIP&CHI	Spe16|Spe37	GMYN	0.832017	3.48442	0.238782	1.31e-14	501	104.156	396.844	NA	287	92.4109	194.589	NA	NA	1.38344	1.04842:1.23123:1:1:1:1	0.444112(0.502994:0.362275:0.467066)	NA	NA	NA	NA
A_crys	CHI&DIP	Spe41|Spe45	GMYN	0.516465	3.62611	0.14243	1.67e-17	549	125.815	423.185	NA	255	99.366	155.634	NA	NA	1.2291	1.0311:1.58247:1:1:1:1	0.547359(0.617486:0.39071:0.63388)	NA	NA	NA	NA
A_crys	DIP&CHI	Spe16|Spe34	GMYN	0.95048	3.68421	0.257988	2.88e-09	594	135.949	458.051	NA	351	109.088	241.912	NA	NA	1.57615	1.47944:1.42713:1:1:1:1	0.445286(0.505051:0.366162:0.464646)	NA	NA	NA	NA
A_crys	SYM&SYM	Spe08|Spe52	GMYN	0.216755	3.69052	0.0587329	4.7e-48	558	137.098	420.902	NA	197	118.319	78.6813	NA	NA	1.07025	1.91485:1.75311:1:1:1:1	0.542115(0.61828:0.376344:0.63172)	NA	NA	NA	NA
A_crys	CHI&DIP	Spe35|Spe48	GMYN	0.567801	3.64506	0.155773	6.55e-16	531	129.034	401.966	NA	259	102.003	156.997	NA	NA	1.31558	1.20198:2.22784:1:1:1:1	0.489642(0.576271:0.381356:0.511299)	NA	NA	NA	NA
A_crys	DIP&CHI	Spe16|Spe38	GMYN	0.461367	3.60063	0.128135	2.03e-25	498	121.613	376.387	NA	233	105.064	127.936	NA	NA	1.22798	1.55375:2.07261:1:1:1:1	0.4749(0.533133:0.388554:0.503012)	NA	NA	NA	NA
A_crys	CHI&PAU	Spe03|Spe10	GMYN	0.971129	3.71689	0.261275	1.21e-15	687	142.004	544.996	NA	412	124.491	287.509	NA	NA	1.53868	0.626953:1.27303:1:1:1:1	0.461426(0.519651:0.417031:0.447598)	NA	NA	NA	NA
A_crys	CHI&DIP	Spe02|Spe45	GMYN	0.737238	3.49735	0.210799	1.48e-19	528	105.968	422.032	NA	289	96.4141	192.586	NA	NA	1.29119	0.570621:1.03147:1:1:1:1	0.465909(0.548295:0.366477:0.482955)	NA	NA	NA	NA
A_crys	SYM&DIP	Spe08|Spe11	GMYN	0.268516	3.6387	0.0737945	4.17e-38	537	127.945	409.055	NA	200	108.463	91.5371	NA	NA	1.07149	1.24529:1.34766:1:1:1:1	0.503724(0.589385:0.357542:0.564246)	NA	NA	NA	NA
A_crys	DIP&CHI	Spe14|Spe41	GMYN	0.386093	3.53957	0.109079	1.34e-22	501	112.104	388.896	NA	206	90.345	115.655	NA	NA	1.09172	1.59781:2.75228:1:1:1:1	0.566866(0.610778:0.383234:0.706587)	NA	NA	NA	NA
A_crys	DIP&PAU	Spe48|Spe51	GMYN	0.767208	3.58328	0.214108	5.5e-11	504	118.831	385.169	NA	277	95.3403	181.66	NA	NA	1.43117	1.45651:1.80872:1:1:1:1	0.488095(0.541667:0.392857:0.529762)	NA	NA	NA	NA
A_crys	SYM&CHI	Spe09|Spe37	GMYN	0.733688	3.39474	0.216125	7.09e-17	513	92.4183	420.582	NA	276	83.9355	192.064	NA	NA	1.21308	0.585275:1.41776:1:1:1:1	0.47271(0.520468:0.350877:0.546784)	NA	NA	NA	NA
A_crys	CHI&DIP	Spe31|Spe43	GMYN	0.789602	3.73157	0.211601	4.29e-10	588	144.811	443.189	NA	324	111.658	212.342	NA	NA	1.51414	1.0295:1.5384:1:1:1:1	0.583333(0.596939:0.515306:0.637755)	NA	NA	NA	NA
A_crys	DIP&CHI	Spe17|Spe38	GMYN	0.42231	3.54067	0.119274	4.65e-36	540	112.269	427.731	NA	242	105.953	136.047	NA	NA	1.07063	0.821768:2.0893:1:1:1:1	0.548148(0.583333:0.397222:0.663889)	NA	NA	NA	NA
A_crys	DIP&DIP	Spe43|Spe49	GMYN	0.834207	3.76355	0.221654	3.52e-14	600	151.119	448.881	NA	347	125.418	221.582	NA	NA	1.57201	1.25766:1.85618:1:1:1:1	0.5475(0.6025:0.485:0.555)	NA	NA	NA	NA
A_crys	CHI&DIP	Spe41|Spe47	GMYN	0.595562	3.39867	0.175234	3.43e-19	450	92.9036	357.096	NA	227	83.5257	143.474	NA	NA	1.17427	0.495959:2.0945:1:1:1:1	0.576667(0.61:0.416667:0.703333)	NA	NA	NA	NA
A_crys	DIP&CHI	Spe12|Spe34	GMYN	0.677483	3.57695	0.189402	1.11e-14	531	117.833	413.167	NA	277	97.3212	179.679	NA	NA	1.3209	0.6877:1.65375:1:1:1:1	0.487759(0.556497:0.381356:0.525424)	NA	NA	NA	NA
A_crys	SYM&DIP	Spe09|Spe50	GMYN	0.574738	3.38162	0.169959	3.39e-20	516	90.815	425.185	NA	250	81.9299	168.07	NA	NA	1.06874	1.25953:1.608:1:1:1:1	0.55814(0.561047:0.377907:0.735465)	NA	NA	NA	NA
A_crys	CHI&CHI	Spe01|Spe33	GMYN	0.909191	3.714	0.244801	1.86e-10	636	141.457	494.543	NA	367	113.483	253.517	NA	NA	1.53303	1.08726:1.15281:1:1:1:1	0.47327(0.554245:0.396226:0.46934)	NA	NA	NA	NA
A_crys	SYM&DIP	Spe08|Spe16	GMYN	0.36508	3.54029	0.103122	3.42e-40	498	112.212	385.788	NA	217	106.858	110.142	NA	NA	1.08053	1.00792:1.50358:1:1:1:1	0.478916(0.554217:0.355422:0.527108)	NA	NA	NA	NA
A_crys	DIP&CHI	Spe12|Spe37	GMYN	0.782962	3.61881	0.216359	2.03e-13	540	124.597	415.403	NA	302	104.009	197.991	NA	NA	1.43729	1.32604:1.44046:1:1:1:1	0.487037(0.577778:0.355556:0.527778)	NA	NA	NA	NA
A_crys	SYM&DIP	Spe07|Spe44	GMYN	0.627801	3.43815	0.182599	1.15e-14	429	97.9245	331.076	NA	221	82.5519	138.448	NA	NA	1.2693	0.99616:1.37322:1:1:1:1	0.520979(0.566434:0.391608:0.604895)	NA	NA	NA	NA
A_crys	DIP&SYM	Spe15|Spe52	GMYN	0.289329	3.65321	0.0791985	4.21e-48	561	130.445	430.555	NA	223	120.581	102.419	NA	NA	1.07151	1.21054:1.69913:1:1:1:1	0.546346(0.617647:0.395722:0.625668)	NA	NA	NA	NA
A_crys	CHI&PAU	Spe04|Spe51	GMYN	0.857688	3.57876	0.23966	3.13e-11	546	118.118	427.882	NA	311	97.6407	213.359	NA	NA	1.44635	1.33006:2.45322:1:1:1:1	0.52381(0.519231:0.395604:0.656593)	NA	NA	NA	NA
A_crys	CHI&CHI	Spe38|Spe41	GMYN	0.300967	3.62655	0.0829899	2.28e-35	519	125.889	393.111	NA	204	107.638	96.3618	NA	NA	1.10763	1.19964:2.27654:1:1:1:1	0.522158(0.580925:0.372832:0.612717)	NA	NA	NA	NA
A_crys	SYM&CHI	Spe08|Spe31	GMYN	0.382547	3.68169	0.103905	2.82e-31	567	135.494	431.506	NA	243	115.238	127.762	NA	NA	1.17093	1.21988:1.01136:1:1:1:1	0.525573(0.584656:0.410053:0.582011)	NA	NA	NA	NA
A_crys	SYM&DIP	Spe07|Spe45	GMYN	0.817777	3.633	0.225097	2.33e-13	537	126.977	410.023	NA	307	106.947	200.053	NA	NA	1.48345	1.55965:2.20697:1:1:1:1	0.515829(0.522346:0.396648:0.628492)	NA	NA	NA	NA
A_crys	DIP&CHI	Spe15|Spe38	GMYN	0.337823	3.62497	0.0931933	1.57e-27	540	125.625	414.375	NA	213	101.702	111.298	NA	NA	1.10254	0.990662:1.79687:1:1:1:1	0.499074(0.588889:0.388889:0.519444)	NA	NA	NA	NA
A_crys	DIP&DIP	Spe14|Spe17	GMYN	0.358852	3.44158	0.10427	0	522	98.3741	423.626	NA	220	100.444	119.556	NA	NA	0.939811	1.1887:1.56377:1:1:1:1	0.587165(0.612069:0.396552:0.752874)	NA	NA	NA	NA
A_crys	DIP&DIP	Spe13|Spe45	GMYN	0.690783	3.72162	0.185614	2.22e-14	600	142.901	457.099	NA	317	114.088	202.912	NA	NA	1.41263	1.09059:1.00781:1:1:1:1	0.485(0.5725:0.3925:0.49)	NA	NA	NA	NA
A_crys	CHI&CHI	Spe03|Spe38	GMYN	0.576765	3.58121	0.161053	8.49e-23	537	118.504	418.496	NA	270	104.544	165.456	NA	NA	1.23978	0.896396:1.60428:1:1:1:1	0.464618(0.539106:0.393855:0.460894)	NA	NA	NA	NA
A_crys	DIP&CHI	Spe15|Spe41	GMYN	0.455374	3.65026	0.124751	1.87e-19	534	129.932	404.068	NA	238	101.75	136.25	NA	NA	1.23275	1.41385:1.69155:1:1:1:1	0.544944(0.609551:0.401685:0.623596)	NA	NA	NA	NA
A_crys	DIP&PAU	Spe42|Spe51	GMYN	0.806211	3.5854	0.22486	6.14e-11	516	119.168	396.832	NA	288	96.5789	191.421	NA	NA	1.44805	0.896028:2.42402:1:1:1:1	0.527132(0.561047:0.395349:0.625)	NA	NA	NA	NA
A_crys	CHI&DIP	Spe04|Spe17	GMYN	0.495851	3.49425	0.141905	1.35e-30	546	105.53	440.47	NA	257	99.1242	157.876	NA	NA	1.07538	1.56333:1.5246:1:1:1:1	0.584249(0.593407:0.414835:0.744505)	NA	NA	NA	NA
A_crys	DIP&DIP	Spe44|Spe49	GMYN	0.360424	3.67197	0.0981556	3.86e-34	555	133.748	421.252	NA	235	115.978	119.022	NA	NA	1.15846	0.818161:1.08639:1:1:1:1	0.482883(0.610811:0.405405:0.432432)	NA	NA	NA	NA
A_crys	CHI&DIP	Spe05|Spe44	GMYN	0.57963	3.58981	0.161465	3.64e-14	522	119.871	402.129	NA	253	93.8424	159.158	NA	NA	1.27088	0.838336:1.822:1:1:1:1	0.472222(0.554598:0.390805:0.471264)	NA	NA	NA	NA
A_crys	CHI&DIP	Spe38|Spe46	GMYN	0.414252	3.49013	0.118692	0	531	104.952	426.048	NA	240	106.26	133.74	NA	NA	1.0222	0.769774:1.84978:1:1:1:1	0.579096(0.624294:0.403955:0.70904)	NA	NA	NA	NA
A_crys	CHI&CHI	Spe03|Spe33	GMYN	0.639943	3.6552	0.175077	6.59e-18	612	130.792	481.208	NA	312	109.014	202.986	NA	NA	1.28434	0.817938:1.28211:1:1:1:1	0.451797(0.526961:0.384804:0.443627)	NA	NA	NA	NA
A_crys	DIP&DIP	Spe11|Spe48	GMYN	0.322166	3.22193	0.0999916	7.06e-22	528	123.55	404.45	NA	196	91.3997	104.6	NA	NA	1.0007	0.86461:1.4161:1:1:1:1	0.487689(0.602273:0.389205:0.471591)	NA	NA	NA	NA
A_crys	CHI&DIP	Spe04|Spe11	GMYN	0.442205	3.68735	0.119925	1.23e-18	558	136.52	421.48	NA	243	103.771	139.229	NA	NA	1.23616	1.35948:1.20516:1:1:1:1	0.537634(0.599462:0.413978:0.599462)	NA	NA	NA	NA
A_crys	CHI&DIP	Spe35|Spe45	GMYN	0.570974	3.55248	0.160726	6.97e-23	504	114.05	389.95	NA	255	101.811	153.189	NA	NA	1.24566	1.00691:1.60682:1:1:1:1	0.513889(0.583333:0.35119:0.607143)	NA	NA	NA	NA
A_crys	DIP&CHI	Spe17|Spe37	GMYN	0.913647	3.4936	0.26152	1.9e-24	522	105.44	416.56	NA	320	104.237	215.763	NA	NA	1.43478	1.18196:1.15981:1:1:1:1	0.529693(0.58046:0.367816:0.640805)	NA	NA	NA	NA
A_crys	SYM&DIP	Spe09|Spe12	GMYN	0.674644	3.52301	0.191496	4.9e-12	534	109.656	424.344	NA	272	87.4802	184.52	NA	NA	1.25955	1.01818:1.82433:1:1:1:1	0.514045(0.539326:0.373596:0.629213)	NA	NA	NA	NA
A_crys	SYM&DIP	Spe09|Spe16	GMYN	0.65506	3.4864	0.18789	4.9e-19	483	104.432	378.568	NA	256	93.5279	162.472	NA	NA	1.26724	1.31767:1.81967:1:1:1:1	0.473085(0.506211:0.357143:0.555901)	NA	NA	NA	NA
A_crys	DIP&CHI	Spe17|Spe41	GMYN	0.449666	3.35414	0.134063	2.58e-27	504	87.5479	416.452	NA	221	81.9029	139.097	NA	NA	0.954191	1.10881:1.58899:1:1:1:1	0.593254(0.580357:0.416667:0.782738)	NA	NA	NA	NA
A_crys	CHI&SYM	Spe03|Spe07	GMYN	0.963139	3.59847	0.267652	1.89e-11	564	121.263	442.737	NA	334	102.707	231.293	NA	NA	1.52975	0.603594:2.31256:1:1:1:1	0.492021(0.486702:0.422872:0.566489)	NA	NA	NA	NA
A_crys	DIP&SYM	Spe47|Spe52	GMYN	0.496723	3.44033	0.144382	1.19e-22	468	98.2102	369.79	NA	220	87.3889	132.611	NA	NA	1.11444	1.14916:1.63944:1:1:1:1	0.559829(0.615385:0.387821:0.676282)	NA	NA	NA	NA
A_crys	SYM&SYM	Spe08|Spe09	GMYN	0.573519	3.61357	0.158713	2.91e-15	528	123.729	404.271	NA	257	97.97	159.03	NA	NA	1.28591	1.65706:2.69009:1:1:1:1	0.508523(0.551136:0.363636:0.610795)	NA	NA	NA	NA
A_crys	CHI&CHI	Spe32|Spe34	GMYN	0.642796	3.54379	0.181387	1.1e-18	540	112.736	427.264	NA	277	97.2755	179.725	NA	NA	1.24844	0.538796:1.83668:1:1:1:1	0.456481(0.544444:0.394444:0.430556)	NA	NA	NA	NA
A_crys	SYM&DIP	Spe09|Spe48	GMYN	0.590318	3.6094	0.16355	3.27e-19	525	123.043	401.957	NA	266	104.3	161.7	NA	NA	1.2979	1.31287:1.73972:1:1:1:1	0.493333(0.562857:0.391429:0.525714)	NA	NA	NA	NA
A_crys	CHI&CHI	Spe03|Spe04	GMYN	0.701364	3.74823	0.187119	2.21e-18	621	148.063	472.937	NA	336	124.615	211.385	NA	NA	1.42782	0.855463:1.60082:1:1:1:1	0.505636(0.548309:0.437198:0.531401)	NA	NA	NA	NA
A_crys	CHI&DIP	Spe36|Spe46	GMYN	0.405109	3.55763	0.11387	0	525	114.837	410.163	NA	242	115.423	126.577	NA	NA	1.09468	0.728267:1.46073:1:1:1:1	0.567619(0.648571:0.417143:0.637143)	NA	NA	NA	NA
A_crys	CHI&DIP	Spe34|Spe44	GMYN	0.764729	2.41552	0.316589	2.12e-07	552	129.176	422.824	NA	291	93.0139	197.986	NA	NA	1.15104	0.850121:1.91051:1:1:1:1	0.474638(0.543478:0.377717:0.502717)	NA	NA	NA	NA
A_crys	DIP&DIP	Spe13|Spe44	GMYN	0.654296	3.5553	0.184034	2.48e-16	525	114.48	410.52	NA	271	96.5748	174.425	NA	NA	1.28688	0.670327:0.548249:1:1:1:1	0.469524(0.562857:0.4:0.445714)	NA	NA	NA	NA
A_crys	SYM&CHI	Spe09|Spe41	GMYN	0.649461	3.52229	0.184386	5.71e-14	519	109.551	409.449	NA	265	89.9896	175.01	NA	NA	1.25586	1.39406:1.96259:1:1:1:1	0.540462(0.546243:0.398844:0.676301)	NA	NA	NA	NA
A_crys	CHI&CHI	Spe33|Spe37	GMYN	0.925299	3.62966	0.254927	2.91e-10	594	126.412	467.588	NA	345	103.584	241.416	NA	NA	1.50083	1.10824:1.04468:1:1:1:1	0.462963(0.555556:0.358586:0.474747)	NA	NA	NA	NA
A_crys	DIP&CHI	Spe17|Spe40	GMYN	0.759636	3.45463	0.219889	5.02e-25	498	100.1	397.9	NA	283	97.4248	185.575	NA	NA	1.30134	0.910663:1.42267:1:1:1:1	0.543173(0.578313:0.400602:0.650602)	NA	NA	NA	NA
A_crys	CHI&DIP	Spe02|Spe17	GMYN	0.68387	3.54422	0.192954	4.64e-18	471	112.801	358.199	NA	257	99.387	157.613	NA	NA	1.3689	2.03731:2.35023:1:1:1:1	0.514862(0.563694:0.359873:0.621019)	NA	NA	NA	NA
A_crys	DIP&CHI	Spe15|Spe33	GMYN	0.53916	3.63521	0.148316	6.83e-18	522	127.351	394.649	NA	252	102.541	149.459	NA	NA	1.29449	1.35271:1.38007:1:1:1:1	0.491379(0.58908:0.373563:0.511494)	NA	NA	NA	NA
A_crys	CHI&DIP	Spe36|Spe47	GMYN	0.665069	3.63495	0.182965	1.64e-15	483	127.307	355.693	NA	260	105.884	154.116	NA	NA	1.44786	1.62536:2.34369:1:1:1:1	0.521739(0.624224:0.419255:0.521739)	NA	NA	NA	NA
A_crys	DIP&DIP	Spe11|Spe16	GMYN	0.515706	1.76209	0.292667	4.33e-10	498	136.511	361.489	NA	225	92.6138	132.386	NA	NA	0.857363	2.59532:3.02944:1:1:1:1	0.480924(0.554217:0.358434:0.53012)	NA	NA	NA	NA
A_crys	CHI&DIP	Spe39|Spe45	GMYN	0.821412	2.32714	0.352971	0.00489545	537	132.45	404.55	NA	282	83.6999	198.3	NA	NA	1.1928	2.0626:1.57601:1:1:1:1	0.480447(0.536313:0.374302:0.530726)	NA	NA	NA	NA
A_crys	CHI&DIP	Spe34|Spe49	GMYN	0.82724	3.71411	0.222729	8.65e-17	594	141.478	452.522	NA	344	122.753	221.247	NA	NA	1.51483	0.944184:1.95891:1:1:1:1	0.465488(0.575758:0.383838:0.436869)	NA	NA	NA	NA
A_crys	SYM&DIP	Spe09|Spe46	GMYN	0.636448	3.32233	0.191566	2.98e-26	522	83.9126	438.087	NA	267	82.5366	184.463	NA	NA	1.06821	1.21863:2.37779:1:1:1:1	0.585249(0.591954:0.387931:0.775862)	NA	NA	NA	NA
A_crys	DIP&DIP	Spe11|Spe17	GMYN	0.37355	3.61741	0.103264	1.25e-33	543	124.364	418.636	NA	231	109.151	121.849	NA	NA	1.11649	1.63824:1.97004:1:1:1:1	0.55709(0.604972:0.38674:0.679558)	NA	NA	NA	NA
A_crys	CHI&SYM	Spe05|Spe07	GMYN	0.89891	3.5907	0.250344	2.54e-10	525	120.013	404.987	NA	304	98.0605	205.939	NA	NA	1.51424	1.19299:2.43761:1:1:1:1	0.487619(0.508571:0.385714:0.568571)	NA	NA	NA	NA
A_crys	DIP&DIP	Spe13|Spe42	GMYN	0.680334	2.73512	0.24874	4.56e-09	537	133.606	403.394	NA	275	97.592	177.408	NA	NA	1.19157	1.05876:1.40047:1:1:1:1	0.496276(0.575419:0.410615:0.502793)	NA	NA	NA	NA
A_crys	DIP&DIP	Spe11|Spe12	GMYN	0.328763	3.64301	0.090245	2.64e-30	546	128.683	417.317	NA	216	106.037	109.963	NA	NA	1.10987	1.2752:1.21174:1:1:1:1	0.514652(0.590659:0.368132:0.585165)	NA	NA	NA	NA
A_crys	SYM&DIP	Spe09|Spe13	GMYN	0.777191	3.48507	0.223006	4.25e-10	474	104.246	369.754	NA	256	83.1252	172.875	NA	NA	1.37273	0.596085:2.48944:1:1:1:1	0.471519(0.528481:0.335443:0.550633)	NA	NA	NA	NA
A_crys	DIP&CHI	Spe14|Spe37	GMYN	0.699191	3.49024	0.200327	1.18e-20	480	104.968	375.032	NA	264	96.8369	167.163	NA	NA	1.30955	0.944908:1.33276:1:1:1:1	0.511458(0.60625:0.371875:0.55625)	NA	NA	NA	NA
A_crys	SYM&DIP	Spe09|Spe11	GMYN	0.62355	3.56368	0.174973	1.37e-13	498	115.767	382.233	NA	252	92.7334	159.267	NA	NA	1.30702	1.55866:2.23595:1:1:1:1	0.506024(0.551205:0.36747:0.599398)	NA	NA	NA	NA
A_crys	CHI&DIP	Spe35|Spe46	GMYN	0.57134	3.45358	0.165434	1.88e-20	531	99.9607	431.039	NA	258	88.6202	169.38	NA	NA	1.11392	1.12754:1.96238:1:1:1:1	0.589454(0.627119:0.387006:0.754237)	NA	NA	NA	NA
A_crys	DIP&DIP	Spe47|Spe50	GMYN	0.507303	3.44058	0.147447	1.04e-16	477	98.2423	378.758	NA	218	80.2161	137.784	NA	NA	1.11144	1.26437:1.92774:1:1:1:1	0.587002(0.619497:0.41195:0.72956)	NA	NA	NA	NA
A_crys	CHI&DIP	Spe02|Spe12	GMYN	0.729726	3.53033	0.206702	1.69e-16	522	110.732	411.268	NA	284	96.5539	187.446	NA	NA	1.32382	0.903577:0.86761:1:1:1:1	0.476054(0.551724:0.37069:0.505747)	NA	NA	NA	NA
A_crys	PAU&CHI	Spe10|Spe31	GMYN	0.969921	3.61916	0.267996	1.41e-06	531	124.654	406.346	NA	311	95.7317	215.268	NA	NA	1.59184	0.890047:1.30861:1:1:1:1	0.506591(0.553672:0.440678:0.525424)	NA	NA	NA	NA
A_crys	CHI&DIP	Spe04|Spe13	GMYN	0.731076	3.76902	0.19397	3.79e-19	597	152.225	444.775	NA	334	130.193	203.807	NA	NA	1.5057	1.16192:2.08988:1:1:1:1	0.50335(0.567839:0.407035:0.535176)	NA	NA	NA	NA
A_crys	SYM&PAU	Spe07|Spe51	GMYN	0.599887	3.42955	0.174917	2.14e-19	471	96.8084	374.192	NA	239	86.8989	152.101	NA	NA	1.18149	1.23627:1.37914:1:1:1:1	0.528662(0.528662:0.378981:0.678344)	NA	NA	NA	NA
A_crys	DIP&DIP	Spe42|Spe43	GMYN	0.691437	3.7075	0.186497	7.81e-13	519	140.237	378.763	NA	279	110.91	168.09	NA	NA	1.5064	1.43695:2.3934:1:1:1:1	0.565511(0.618497:0.473988:0.604046)	NA	NA	NA	NA
A_crys	CHI&DIP	Spe03|Spe16	GMYN	0.563371	3.59238	0.156824	1.06e-21	567	120.282	446.718	NA	277	103.262	173.738	NA	NA	1.20593	0.960641:2.25378:1:1:1:1	0.432099(0.5:0.37037:0.425926)	NA	NA	NA	NA
A_crys	DIP&CHI	Spe13|Spe38	GMYN	0.594987	3.59404	0.165548	6.7e-23	543	120.548	422.452	NA	276	106.26	169.74	NA	NA	1.26079	0.634937:1.42697:1:1:1:1	0.471455(0.560773:0.406077:0.447514)	NA	NA	NA	NA
A_crys	DIP&DIP	Spe16|Spe46	GMYN	0.422305	3.59993	0.117309	4.69e-49	588	121.498	466.502	NA	269	120.242	148.758	NA	NA	1.0789	1.16097:1.90575:1:1:1:1	0.543367(0.571429:0.395408:0.663265)	NA	NA	NA	NA
A_crys	CHI&DIP	Spe36|Spe44	GMYN	0.274993	3.6442	0.0754605	1.61e-34	549	128.886	420.114	NA	201	105.329	95.6712	NA	NA	1.06597	0.846558:1.35383:1:1:1:1	0.480874(0.590164:0.418033:0.434426)	NA	NA	NA	NA
A_crys	CHI&CHI	Spe31|Spe39	GMYN	0.785223	3.55891	0.220636	1.04e-14	540	115.033	424.967	NA	299	98.4238	200.576	NA	NA	1.37609	0.490373:1.37916:1:1:1:1	0.502778(0.538889:0.427778:0.541667)	NA	NA	NA	NA
A_crys	DIP&CHI	Spe14|Spe38	GMYN	0.295317	3.65718	0.0807499	5.26e-31	519	131.136	387.864	NA	199	105.328	93.6724	NA	NA	1.14476	1.55765:2.43317:1:1:1:1	0.527938(0.595376:0.395954:0.592486)	NA	NA	NA	NA
A_crys	CHI&DIP	Spe04|Spe42	GMYN	0.403839	3.69332	0.109343	2.65e-24	552	137.61	414.39	NA	237	109.165	127.835	NA	NA	1.22389	1.11476:1.75689:1:1:1:1	0.544384(0.595109:0.432065:0.605978)	NA	NA	NA	NA
A_crys	CHI&CHI	Spe02|Spe35	GMYN	0.775009	3.52885	0.219621	1.53e-18	510	110.513	399.487	NA	287	100.126	186.874	NA	NA	1.37174	0.747204:1.48891:1:1:1:1	0.470588(0.535294:0.364706:0.511765)	NA	NA	NA	NA
A_crys	CHI&CHI	Spe31|Spe33	GMYN	0.481727	3.61986	0.133079	1.64e-25	543	124.771	418.229	NA	254	107.636	146.364	NA	NA	1.20281	0.848571:1.32368:1:1:1:1	0.510129(0.577348:0.406077:0.546961)	NA	NA	NA	NA
A_crys	SYM&PAU	Spe07|Spe10	GMYN	1.08224	3.50195	0.30904	5.33e-06	477	106.619	370.381	NA	290	84.5559	205.444	NA	NA	1.62309	0.837908:1.70706:1:1:1:1	0.502096(0.506289:0.430818:0.569182)	NA	NA	NA	NA
A_crys	CHI&SYM	Spe35|Spe52	GMYN	0.546601	3.57861	0.152741	3.96e-15	531	118.093	412.907	NA	250	92.3225	157.678	NA	NA	1.22091	1.20651:1.78977:1:1:1:1	0.539548(0.584746:0.384181:0.649718)	NA	NA	NA	NA
A_crys	SYM&DIP	Spe09|Spe42	GMYN	0.614951	3.55366	0.173047	5.59e-14	516	114.231	401.769	NA	257	91.2833	165.717	NA	NA	1.26552	1.13926:1.79507:1:1:1:1	0.517442(0.546512:0.389535:0.616279)	NA	NA	NA	NA
A_crys	CHI&DIP	Spe05|Spe13	GMYN	0.652144	3.51196	0.185692	2.35e-17	501	108.053	392.947	NA	261	93.9086	167.091	NA	NA	1.26893	0.8963:1.3142:1:1:1:1	0.442116(0.54491:0.368263:0.413174)	NA	NA	NA	NA
A_crys	SYM&CHI	Spe07|Spe36	GMYN	0.685945	3.58586	0.191291	2.02e-16	504	119.242	384.758	NA	272	101.938	170.062	NA	NA	1.37204	1.1879:1.41545:1:1:1:1	0.503968(0.53869:0.425595:0.547619)	NA	NA	NA	NA
A_crys	CHI&CHI	Spe05|Spe38	GMYN	0.462801	3.58898	0.128951	1.17e-18	519	119.738	399.262	NA	230	94.17	135.83	NA	NA	1.18404	1.24355:1.62608:1:1:1:1	0.466281(0.549133:0.381503:0.468208)	NA	NA	NA	NA
A_crys	CHI&CHI	Spe32|Spe41	GMYN	0.571835	1.89803	0.301278	3.39e-10	567	149.772	417.228	NA	268	103.387	164.613	NA	NA	0.922148	1.1583:1.85333:1:1:1:1	0.528219(0.637566:0.431217:0.515873)	NA	NA	NA	NA
A_crys	DIP&CHI	Spe11|Spe35	GMYN	0.512917	3.56486	0.143881	1.36e-17	519	115.949	403.051	NA	241	93.5325	147.468	NA	NA	1.19475	1.01368:1.44115:1:1:1:1	0.50578(0.560694:0.358382:0.598266)	NA	NA	NA	NA
A_crys	DIP&DIP	Spe44|Spe45	GMYN	0.221383	1.82021	0.121625	2.15e-25	534	132.458	401.542	NA	167	90.5711	76.4289	NA	NA	0.61797	1.1993:1.40149:1:1:1:1	0.514045(0.617978:0.382022:0.542135)	NA	NA	NA	NA
A_crys	CHI&CHI	Spe01|Spe39	GMYN	0.850257	3.65754	0.232467	1.03e-09	630	131.2	498.8	NA	349	102.882	246.118	NA	NA	1.43488	0.979463:1.19204:1:1:1:1	0.45873(0.521429:0.383333:0.471429)	NA	NA	NA	NA
A_crys	CHI&DIP	Spe02|Spe15	GMYN	0.699416	3.46639	0.201771	2.99e-20	474	101.683	372.317	NA	259	93.6957	165.304	NA	NA	1.29299	0.908154:1.1845:1:1:1:1	0.462025(0.556962:0.363924:0.46519)	NA	NA	NA	NA
A_crys	DIP&DIP	Spe12|Spe50	GMYN	0.3089	3.52006	0.0877542	3.41e-39	552	109.225	442.775	NA	210	99.2017	110.798	NA	NA	0.944294	0.860605:1.76921:1:1:1:1	0.571558(0.600543:0.410326:0.703804)	NA	NA	NA	NA
A_crys	DIP&PAU	Spe43|Spe51	GMYN	0.942666	3.60231	0.261684	4.72e-23	573	121.885	451.115	NA	355	117.662	237.338	NA	NA	1.50841	1.03616:1.36605:1:1:1:1	0.54712(0.528796:0.445026:0.667539)	NA	NA	NA	NA
A_crys	CHI&CHI	Spe05|Spe39	GMYN	0.84565	3.58575	0.235836	3.06e-19	546	119.224	426.776	NA	319	109.239	209.761	NA	NA	1.44398	0.75063:1.85984:1:1:1:1	0.471612(0.53022:0.409341:0.475275)	NA	NA	NA	NA
A_crys	PAU&SYM	Spe10|Spe52	GMYN	0.855869	3.57825	0.239186	4.24e-13	534	118.038	415.962	NA	307	100.503	206.497	NA	NA	1.45764	0.587949:1.29071:1:1:1:1	0.525281(0.58427:0.410112:0.581461)	NA	NA	NA	NA
A_crys	DIP&DIP	Spe48|Spe50	GMYN	0.269992	3.59417	0.0751195	1.98e-58	552	120.569	431.431	NA	215	118.23	96.7704	NA	NA	0.996069	0.684656:1.33763:1:1:1:1	0.548913(0.619565:0.418478:0.608696)	NA	NA	NA	NA
A_crys	PAU&CHI	Spe10|Spe39	GMYN	0.99617	3.46929	0.28714	2.49e-05	480	102.076	377.924	NA	280	77.9606	202.039	NA	NA	1.5221	0.931569:1.1825:1:1:1:1	0.467708(0.525:0.409375:0.46875)	NA	NA	NA	NA
A_crys	DIP&DIP	Spe46|Spe49	GMYN	0.550215	3.6973	0.148815	1.1e-29	624	138.342	485.658	NA	311	124.709	186.291	NA	NA	1.24793	0.998029:1.7545:1:1:1:1	0.561699(0.637019:0.420673:0.627404)	NA	NA	NA	NA
A_crys	CHI&DIP	Spe01|Spe44	GMYN	0.765262	3.64195	0.210124	4.44e-21	552	128.501	423.499	NA	316	116.787	199.213	NA	NA	1.43493	1.16576:1.35669:1:1:1:1	0.486413(0.576087:0.404891:0.478261)	NA	NA	NA	NA
A_crys	CHI&DIP	Spe02|Spe43	GMYN	0.864783	3.56505	0.242573	4.78e-11	495	115.978	379.022	NA	286	96.5865	189.414	NA	NA	1.49745	1.38711:2.10838:1:1:1:1	0.513131(0.548485:0.442424:0.548485)	NA	NA	NA	NA
A_crys	DIP&DIP	Spe12|Spe43	GMYN	0.805056	3.67476	0.219077	2.42e-14	570	134.247	435.753	NA	324	113.075	210.925	NA	NA	1.48093	1.39512:2.15848:1:1:1:1	0.569298(0.592105:0.465789:0.65)	NA	NA	NA	NA
A_crys	SYM&CHI	Spe09|Spe40	GMYN	0.671829	3.47066	0.193574	2e-41	510	102.263	407.737	NA	283	106.159	176.841	NA	NA	1.23304	0.770701:1.40719:1:1:1:1	0.503922(0.555882:0.394118:0.561765)	NA	NA	NA	NA
A_crys	CHI&CHI	Spe37|Spe40	GMYN	0.759445	3.62744	0.209361	3.71e-14	576	126.038	449.962	NA	314	104.673	209.327	NA	NA	1.38701	1.01336:1.44283:1:1:1:1	0.480903(0.578125:0.411458:0.453125)	NA	NA	NA	NA
A_crys	CHI&DIP	Spe41|Spe44	GMYN	0.467287	3.16935	0.147439	1.35e-15	531	130.94	400.06	NA	234	96.7698	137.23	NA	NA	1.13359	1.21034:1.81921:1:1:1:1	0.526365(0.60452:0.384181:0.590395)	NA	NA	NA	NA
Alad	SYM&SYM	Spe07|Spe09	GMYN	0.748092	3.11273	0.240333	2.82e-12	267	63.4533	203.547	NA	152	58.4422	93.5578	NA	NA	1.31005	0.679482:1.89683:1:1:1:1	0.470037(0.573034:0.376404:0.460674)	NA	NA	NA	NA
Alad	CHI&PAU	Spe02|Spe10	GMYN	0.265898	3.5499	0.0749029	1.63e-55	468	113.658	354.342	NA	191	112.708	78.2917	NA	NA	1.06345	1.14176:2.09518:1:1:1:1	0.514957(0.564103:0.442308:0.538462)	NA	NA	NA	NA
Alad	SYM&CHI	Spe09|Spe31	GMYN	0.316234	3.66058	0.0863891	0	624	131.732	492.268	NA	260	134.773	125.227	NA	NA	1.02225	0.665849:1.34537:1:1:1:1	0.439904(0.519231:0.420673:0.379808)	NA	NA	NA	NA
Alad	CHI&PAU	Spe31|Spe51	GMYN	0.362732	3.76718	0.0962874	2.33e-32	615	151.851	463.149	NA	256	124.515	131.485	NA	NA	1.20333	1.36821:1.85286:1:1:1:1	0.450407(0.497561:0.417073:0.436585)	NA	NA	NA	NA
Alad	DIP&PAU	Spe47|Spe51	GMYN	0.884553	3.32173	0.266293	3.64e-07	375	83.8454	291.155	NA	215	67.7191	147.281	NA	NA	1.42948	0.851881:1.84778:1:1:1:1	0.438667(0.5:0.424:0.392)	NA	NA	NA	NA
Alad	CHI&SYM	Spe02|Spe09	GMYN	0.306243	3.22355	0.0950017	0	381	73.5578	307.442	NA	156	79.8756	76.1244	NA	NA	0.869473	0.366346:1.43805:1:1:1:1	0.435696(0.523622:0.456693:0.326772)	NA	NA	NA	NA
Alad	CHI&PAU	Spe04|Spe10	GMYN	0.310522	3.46987	0.0894909	2.4e-29	444	102.155	341.845	NA	173	87.2967	85.7033	NA	NA	1.03742	0.87304:2.59763:1:1:1:1	0.501126(0.523649:0.425676:0.554054)	NA	NA	NA	NA
Alad	CHI&CHI	Spe02|Spe31	GMYN	0.253177	3.65053	0.0693536	1.01e-23	438	112.513	325.487	NA	153	83.7352	69.2648	NA	NA	1.12588	1.34026:1.73856:1:1:1:1	0.473744(0.523973:0.458904:0.438356)	NA	NA	NA	NA
Alad	DIP&CHI	Spe12|Spe31	GMYN	0.245221	3.87482	0.0632859	2.08e-57	741	175.287	565.713	NA	269	151.775	117.225	NA	NA	1.10382	1.0572:1.6295:1:1:1:1	0.453441(0.51417:0.421053:0.425101)	NA	NA	NA	NA
Alad	SYM&PAU	Spe09|Spe51	GMYN	0.435547	3.48207	0.125083	3.69e-33	513	103.83	409.17	NA	230	97.0783	132.922	NA	NA	1.05216	0.806963:1.47913:1:1:1:1	0.41423(0.51462:0.394737:0.333333)	NA	NA	NA	NA
Alad	PAU&DIP	Spe10|Spe12	GMYN	0.324536	4.06132	0.0799091	6.48e-72	936	224.773	711.227	NA	389	204.012	184.988	NA	NA	1.22189	0.959496:1.98572:1:1:1:1	0.486111(0.548077:0.418269:0.491987)	NA	NA	NA	NA
Alad	CHI&DIP	Spe04|Spe12	GMYN	0.222578	3.51122	0.0633906	1.2e-42	438	107.945	330.055	NA	160	97.0496	62.9504	NA	NA	1.03307	1.08813:1.89049:1:1:1:1	0.464612(0.544521:0.410959:0.438356)	NA	NA	NA	NA
Alad	CHI&DIP	Spe03|Spe12	GMYN	0.260941	3.73765	0.0698142	0	756	145.99	610.01	NA	283	150.491	132.509	NA	NA	0.932325	0.828156:2.29271:1:1:1:1	0.420635(0.535714:0.412698:0.313492)	NA	NA	NA	NA
Alad	CHI&CHI	Spe02|Spe03	GMYN	0.221639	3.43189	0.0645821	5.04e-39	468	97.1115	370.889	NA	157	86.6591	70.3409	NA	NA	0.887777	0.48206:1.11769:1:1:1:1	0.451923(0.544872:0.445513:0.365385)	NA	NA	NA	NA
Alad	PAU&PAU	Spe10|Spe51	GMYN	0.393634	3.78617	0.103966	2.25e-45	657	155.745	501.255	NA	294	142.818	151.182	NA	NA	1.19785	0.617403:1.89109:1:1:1:1	0.487062(0.538813:0.447489:0.474886)	NA	NA	NA	NA
Alad	SYM&CHI	Spe07|Spe31	GMYN	1.00137	2.82797	0.354096	1.13e-10	198	43.4073	154.593	NA	125	43.2941	81.7059	NA	NA	1.40182	0.537333:2.09446:1:1:1:1	0.502525(0.537879:0.393939:0.575758)	NA	NA	NA	NA
Alad	CHI&SYM	Spe04|Spe09	GMYN	0.347878	2.77364	0.125423	0	174	40.3739	133.626	NA	83	46.2913	36.7087	NA	NA	0.910736	0.746552:1.0193:1:1:1:1	0.465517(0.491379:0.525862:0.37931)	NA	NA	NA	NA
Alad	CHI&SYM	Spe02|Spe07	GMYN	0.0706437	2.66492	0.0265088	4.46e-18	126	34.9257	91.0743	NA	36	29.892	6.10804	NA	NA	0.789745	2:2:1:1:1:1	0.515873(0.666667:0.380952:0.5)	NA	NA	NA	NA
Alad	PAU&DIP	Spe10|Spe47	GMYN	0.324879	3.41287	0.0951923	2.13e-23	393	94.6793	298.321	NA	156	78.1716	77.8284	NA	NA	1.06882	1.23215:1.82752:1:1:1:1	0.506361(0.530534:0.427481:0.561069)	NA	NA	NA	NA
Alad	SYM&DIP	Spe09|Spe47	GMYN	0.317536	2.70126	0.117551	0	135	36.66	98.34	NA	61	36.0872	24.9128	NA	NA	0.964851	2:2:1:1:1:1	0.488889(0.522222:0.566667:0.377778)	NA	NA	NA	NA
Alad	SYM&DIP	Spe07|Spe12	GMYN	0.212795	3.23143	0.0658515	9.98e-22	306	74.3347	231.665	NA	101	58.4555	42.5445	NA	NA	0.946094	0.653173:1.18706:1:1:1:1	0.506536(0.588235:0.372549:0.558824)	NA	NA	NA	NA
Alad	CHI&SYM	Spe03|Spe09	GMYN	0.323248	3.46723	0.0932295	0	627	101.796	525.204	NA	255	119.467	135.533	NA	NA	0.833684	0.419439:1.54827:1:1:1:1	0.405901(0.538278:0.409091:0.270335)	NA	NA	NA	NA
Alad	CHI&CHI	Spe04|Spe31	GMYN	0.222139	0.341785	0.649937	0.204714	243	61.649	181.351	NA	51	16.3864	34.6136	NA	NA	0.252493	1.4037:1.2322:1:1:1:1	0.479424(0.506173:0.469136:0.462963)	NA	NA	NA	NA
Alad	CHI&PAU	Spe02|Spe51	GMYN	0.315132	2.56502	0.122857	6.88e-13	273	73.4674	199.533	NA	104	53.2981	50.7019	NA	NA	0.920601	1.40817:1.35609:1:1:1:1	0.470696(0.516484:0.467033:0.428571)	NA	NA	NA	NA
Alad	SYM&DIP	Spe07|Spe47	GMYN	0.170291	3.1799	0.0535524	1.76e-22	300	69.3988	230.601	NA	88	53.1332	34.8668	NA	NA	0.866502	0.670497:1.11861:1:1:1:1	0.51(0.565:0.385:0.58)	NA	NA	NA	NA
Alad	DIP&PAU	Spe12|Spe51	GMYN	0.346766	3.66348	0.0946546	7.54e-33	561	132.244	428.756	NA	230	112.298	117.702	NA	NA	1.12861	1.21023:1.52078:1:1:1:1	0.430481(0.502674:0.427807:0.360963)	NA	NA	NA	NA
Alad	DIP&DIP	Spe12|Spe47	GMYN	0.125672	3.41716	0.0367768	3.99e-32	393	95.2226	297.777	NA	106	71.7455	34.2545	NA	NA	0.92319	0.937758:1.37949:1:1:1:1	0.468193(0.549618:0.416031:0.438931)	NA	NA	NA	NA
Alad	CHI&SYM	Spe04|Spe07	GMYN	0.204527	3.22237	0.063471	1.56e-26	306	73.4417	232.558	NA	104	62.7314	41.2686	NA	NA	0.928826	0.912956:1.0658:1:1:1:1	0.50817(0.573529:0.387255:0.563725)	NA	NA	NA	NA
Alad	CHI&DIP	Spe04|Spe47	GMYN	0.162447	3.42829	0.0473844	2.5e-29	393	96.6458	296.354	NA	117	73.9468	43.0532	NA	NA	0.965577	1.32876:1.54131:1:1:1:1	0.469466(0.530534:0.419847:0.458015)	NA	NA	NA	NA
Alad	CHI&DIP	Spe02|Spe47	GMYN	0.118195	3.02552	0.039066	5.34e-22	219	56.4878	162.512	NA	62	44.3314	17.6686	NA	NA	0.868097	1.28938:1.8611:1:1:1:1	0.488584(0.582192:0.452055:0.431507)	NA	NA	NA	NA
Alad	SYM&PAU	Spe09|Spe10	GMYN	0.437909	3.67575	0.119134	0	627	134.425	492.575	NA	303	142.555	160.445	NA	NA	1.13208	0.689828:1.78334:1:1:1:1	0.467305(0.559809:0.423445:0.41866)	NA	NA	NA	NA
Alad	CHI&DIP	Spe03|Spe47	GMYN	0.263205	2.96184	0.0888655	0	243	51.8894	191.111	NA	93	51.1448	41.8552	NA	NA	0.839462	0.674757:1.19857:1:1:1:1	0.460905(0.518519:0.450617:0.41358)	NA	NA	NA	NA
Alad	CHI&CHI	Spe02|Spe04	GMYN	0.143352	2.98667	0.0479974	8.18e-21	258	68.5233	189.477	NA	75	50.4343	24.5657	NA	NA	0.89852	1.63238:2.32064:1:1:1:1	0.472868(0.55814:0.424419:0.436047)	NA	NA	NA	NA
Alad	CHI&PAU	Spe03|Spe51	GMYN	0.385532	3.57978	0.107697	3.69e-26	519	118.279	400.721	NA	218	98.6887	119.311	NA	NA	1.11349	1.31401:1.64046:1:1:1:1	0.427746(0.534682:0.419075:0.32948)	NA	NA	NA	NA
Alad	CHI&CHI	Spe03|Spe31	GMYN	0.278418	3.76407	0.0739672	7e-65	696	151.224	544.776	NA	269	144.006	124.994	NA	NA	1.03577	0.567223:1.40504:1:1:1:1	0.458333(0.543103:0.439655:0.392241)	NA	NA	NA	NA
Alad	CHI&DIP	Spe31|Spe47	GMYN	0.351032	2.95059	0.11897	9.75e-13	204	51.1171	152.883	NA	85	42.6296	42.3704	NA	NA	1.00241	1.6025:1.74694:1:1:1:1	0.482843(0.522059:0.455882:0.470588)	NA	NA	NA	NA
Alad	CHI&PAU	Spe03|Spe10	GMYN	0.429749	3.88006	0.110758	3.73e-41	753	176.515	576.485	NA	340	154.438	185.562	NA	NA	1.23856	0.877251:1.76298:1:1:1:1	0.482072(0.569721:0.424303:0.452191)	NA	NA	NA	NA
Alad	CHI&PAU	Spe04|Spe51	GMYN	1.01061	3.97445	0.254276	0.000116227	459	115.166	343.834	NA	273	85.9427	187.057	NA	NA	1.75425	1.17125:1.89603:1:1:1:1	0.447712(0.509804:0.424837:0.408497)	NA	NA	NA	NA
Alad	SYM&DIP	Spe09|Spe12	GMYN	0.284351	3.49165	0.0814374	0	624	105.165	518.835	NA	238	117.192	120.808	NA	NA	0.824886	0.433588:1.72511:1:1:1:1	0.404647(0.514423:0.413462:0.286058)	NA	NA	NA	NA
Alad	CHI&SYM	Spe03|Spe07	GMYN	0.489427	2.61691	0.187025	2.15e-10	153	32.76	120.24	NA	73	30.7417	42.2583	NA	NA	0.944957	0.995819:0.786681:1:1:1:1	0.5(0.558824:0.421569:0.519608)	NA	NA	NA	NA
Alad	CHI&CHI	Spe03|Spe04	GMYN	0.332541	3.08006	0.107966	2.23e-15	285	60.7488	224.251	NA	109	49.7162	59.2838	NA	NA	0.918185	0.667968:0.708823:1:1:1:1	0.450877(0.510526:0.436842:0.405263)	NA	NA	NA	NA
Alad	CHI&DIP	Spe02|Spe12	GMYN	0.178458	2.72701	0.065441	3.21e-29	468	112.216	355.784	NA	138	81.9437	56.0563	NA	NA	0.789544	1.54517:1.79202:1:1:1:1	0.450855(0.544872:0.435897:0.371795)	NA	NA	NA	NA
Alad	PAU&CHI	Spe10|Spe31	GMYN	0.365738	3.93044	0.0930526	8.91e-55	795	188.782	606.218	NA	344	170.849	173.151	NA	NA	1.21222	1.00259:1.78124:1:1:1:1	0.510063(0.541509:0.439623:0.549057)	NA	NA	NA	NA
Alad	SYM&PAU	Spe07|Spe51	GMYN	1.30025	3.29727	0.394341	0.00014966	297	81.1547	215.845	NA	187	64.8407	122.159	NA	NA	1.84593	2.0626:4.84418:1:1:1:1	0.484848(0.540404:0.40404:0.510101)	NA	NA	NA	NA
Alad	SYM&PAU	Spe07|Spe10	GMYN	0.330919	3.185	0.103899	1.73e-22	306	69.8717	236.128	NA	125	62.4812	62.5188	NA	NA	0.982615	1.53649:1.81538:1:1:1:1	0.542484(0.558824:0.392157:0.676471)	NA	NA	NA	NA
Alas	DIP&DIP	Spe14|Spe42	GMYN	0.241985	3.65952	0.0661247	3.54e-52	561	131.547	429.453	NA	208	120.095	87.9052	NA	NA	1.04335	1.13171:2.57434:1:1:1:1	0.446524(0.524064:0.414439:0.40107)	NA	NA	NA	NA
Alas	CHI&PAU	Spe02|Spe10	GMYN	0.509385	4.18372	0.121754	4.79e-65	1146	264.618	881.382	NA	566	244.997	321.003	NA	NA	1.35781	1.04152:1.14492:1:1:1:1	0.488656(0.528796:0.421466:0.515707)	NA	NA	NA	NA
Alas	DIP&CHI	Spe14|Spe31	GMYN	0.228585	3.66813	0.0623163	1.54e-47	561	133.066	427.934	NA	200	116.58	83.4199	NA	NA	1.04442	0.779181:2.18688:1:1:1:1	0.506239(0.564171:0.433155:0.52139)	NA	NA	NA	NA
Alas	DIP&DIP	Spe12|Spe42	GMYN	0.140206	4.38826	0.0319503	2.35e-173	1464	347.588	1116.41	NA	462	320.426	141.574	NA	NA	1.1488	1.04235:2.54155:1:1:1:1	0.479508(0.545082:0.394467:0.498975)	NA	NA	NA	NA
Alas	SYM&CHI	Spe09|Spe31	GMYN	0.901925	4.40301	0.204843	1.63e-32	1479	354.489	1124.51	NA	882	302.546	579.454	NA	NA	1.74107	1.27413:1.47621:1:1:1:1	0.509128(0.547667:0.410751:0.568966)	NA	NA	NA	NA
Alas	CHI&PAU	Spe31|Spe51	GMYN	0.932726	4.43607	0.210259	5.79e-17	1527	370.466	1156.53	NA	889	283.098	605.902	NA	NA	1.78267	1.57293:1.82964:1:1:1:1	0.523903(0.532417:0.428291:0.611002)	NA	NA	NA	NA
Alas	DIP&PAU	Spe47|Spe51	GMYN	0.978861	3.49541	0.280042	4.6e-11	477	105.693	371.307	NA	289	91.8914	197.109	NA	NA	1.53648	0.82748:2.17424:1:1:1:1	0.505241(0.509434:0.393082:0.613208)	NA	NA	NA	NA
Alas	CHI&SYM	Spe02|Spe09	GMYN	0.328395	4.08102	0.0804688	3.74e-59	963	230.756	732.244	NA	389	196.786	192.214	NA	NA	1.22761	1.68237:1.88886:1:1:1:1	0.442887(0.512461:0.392523:0.423676)	NA	NA	NA	NA
Alas	CHI&PAU	Spe04|Spe10	GMYN	0.899001	4.44994	0.202025	6.4e-28	1602	377.382	1224.62	NA	940	309.783	630.217	NA	NA	1.73549	1.41825:1.80896:1:1:1:1	0.553059(0.558052:0.453184:0.64794)	NA	NA	NA	NA
Alas	CHI&CHI	Spe02|Spe31	GMYN	1.13309	2.39727	0.472658	8.21e-06	1149	291.626	857.374	NA	702	209.771	492.229	NA	NA	1.45395	1.60463:1.48109:1:1:1:1	0.479547(0.539164:0.43342:0.466057)	NA	NA	NA	NA
Alas	DIP&CHI	Spe12|Spe31	GMYN	0.228139	4.4449	0.051326	5.12e-149	1650	374.855	1275.15	NA	591	342.283	248.717	NA	NA	1.18612	1.13587:1.87772:1:1:1:1	0.536364(0.561818:0.425455:0.621818)	NA	NA	NA	NA
Alas	PAU&DIP	Spe10|Spe42	GMYN	0.928032	4.37067	0.212332	3.46e-26	1371	339.53	1031.47	NA	822	283.145	538.855	NA	NA	1.78061	1.46661:1.51709:1:1:1:1	0.48833(0.539387:0.411379:0.514223)	NA	NA	NA	NA
Alas	SYM&PAU	Spe09|Spe51	GMYN	0.440386	4.43502	0.0992975	2.08e-98	1554	369.946	1184.05	NA	729	340.519	388.481	NA	NA	1.39135	1.35288:1.89378:1:1:1:1	0.493887(0.511583:0.403475:0.566602)	NA	NA	NA	NA
Alas	CHI&DIP	Spe04|Spe14	GMYN	0.234435	3.66032	0.0640476	7.7e-47	561	131.687	429.313	NA	201	115.58	85.4195	NA	NA	1.03862	0.643701:2.1723:1:1:1:1	0.503565(0.558824:0.435829:0.516043)	NA	NA	NA	NA
Alas	PAU&DIP	Spe10|Spe12	GMYN	0.831726	4.31727	0.192651	1.59e-38	1527	316.195	1210.8	NA	873	276.615	596.385	NA	NA	1.55348	0.951028:1.45841:1:1:1:1	0.549771(0.560904:0.417485:0.670923)	NA	NA	NA	NA
Alas	CHI&DIP	Spe04|Spe12	GMYN	0.230292	4.45078	0.051742	4.29e-137	1650	377.805	1272.19	NA	586	335.896	250.104	NA	NA	1.19667	1.21324:1.91632:1:1:1:1	0.534242(0.557273:0.423636:0.621818)	NA	NA	NA	NA
Alas	CHI&DIP	Spe03|Spe12	GMYN	1.0274	4.443	0.231241	4.27e-33	1551	373.907	1177.09	NA	971	326.285	644.715	NA	NA	1.85082	1.41053:1.79758:1:1:1:1	0.461315(0.517408:0.422631:0.443907)	NA	NA	NA	NA
Alas	CHI&CHI	Spe02|Spe03	GMYN	0.380006	4.10131	0.0926549	8.18e-66	1197	237.083	959.917	NA	493	210.461	282.539	NA	NA	1.11706	1.52264:1.75346:1:1:1:1	0.394737(0.471178:0.399749:0.313283)	NA	NA	NA	NA
Alas	PAU&PAU	Spe10|Spe51	GMYN	0.295511	4.44179	0.0665297	8.56e-87	1575	373.304	1201.7	NA	592	301.348	290.652	NA	NA	1.27826	2.08855:1.71582:1:1:1:1	0.527302(0.511429:0.410476:0.66)	NA	NA	NA	NA
Alas	SYM&DIP	Spe09|Spe14	GMYN	1.20663	3.59146	0.335972	2.43e-08	483	120.135	362.865	NA	311	101.408	209.592	NA	NA	1.7998	0.76103:1.90575:1:1:1:1	0.482402(0.555901:0.444099:0.447205)	NA	NA	NA	NA
Alas	DIP&DIP	Spe14|Spe47	GMYN	0.28703	3.69592	0.0776615	3.79e-36	537	138.088	398.912	NA	208	114.381	93.6192	NA	NA	1.16361	1.33368:3.73319:1:1:1:1	0.489758(0.541899:0.410615:0.51676)	NA	NA	NA	NA
Alas	CHI&DIP	Spe03|Spe42	GMYN	0.863963	4.17318	0.207028	2.17e-29	1359	260.925	1098.07	NA	776	225.833	550.167	NA	NA	1.49933	1.19501:1.75997:1:1:1:1	0.398087(0.485651:0.4117:0.296909)	NA	NA	NA	NA
Alas	CHI&SYM	Spe04|Spe09	GMYN	0.969966	4.43671	0.218623	1.56e-23	1497	370.781	1126.22	NA	905	302.815	602.185	NA	NA	1.82862	1.44981:1.48397:1:1:1:1	0.511022(0.553106:0.413828:0.566132)	NA	NA	NA	NA
Alas	CHI&DIP	Spe02|Spe14	GMYN	1.14303	3.49739	0.326825	6.19e-05	465	105.973	359.027	NA	288	82.9955	205.005	NA	NA	1.67959	1.24142:1.85451:1:1:1:1	0.43871(0.529032:0.425806:0.36129)	NA	NA	NA	NA
Alas	CHI&DIP	Spe02|Spe42	GMYN	0.825898	3.7841	0.218255	1.62e-22	783	155.317	627.683	NA	447	139.078	307.922	NA	NA	1.41269	1.46508:1.62753:1:1:1:1	0.406769(0.507663:0.408046:0.304598)	NA	NA	NA	NA
Alas	DIP&PAU	Spe14|Spe51	GMYN	1.00786	3.51172	0.286999	1.74e-14	489	108.017	380.983	NA	304	98.8807	205.119	NA	NA	1.56095	0.692367:1.52747:1:1:1:1	0.468303(0.493865:0.411043:0.5)	NA	NA	NA	NA
Alas	PAU&DIP	Spe10|Spe47	GMYN	1.11956	3.4489	0.324613	7.02e-07	459	99.3386	359.661	NA	282	81.6256	200.374	NA	NA	1.62368	0.729041:2.77759:1:1:1:1	0.550109(0.568627:0.401961:0.679739)	NA	NA	NA	NA
Alas	SYM&DIP	Spe09|Spe47	GMYN	1.02582	3.54904	0.289042	3.22e-08	456	113.528	342.472	NA	280	93.4687	186.531	NA	NA	1.65402	0.873481:1.76494:1:1:1:1	0.507675(0.549342:0.417763:0.555921)	NA	NA	NA	NA
Alas	CHI&SYM	Spe03|Spe09	GMYN	0.273371	4.39036	0.0622662	3.64e-153	1554	348.559	1205.44	NA	611	337.682	273.318	NA	NA	1.1968	1.29883:1.67429:1:1:1:1	0.431467(0.505792:0.411197:0.377413)	NA	NA	NA	NA
Alas	PAU&DIP	Spe10|Spe14	GMYN	0.948375	3.49941	0.27101	9.6e-10	450	106.26	343.74	NA	269	89.0375	179.962	NA	NA	1.55076	0.823655:1.93996:1:1:1:1	0.514444(0.553333:0.423333:0.566667)	NA	NA	NA	NA
Alas	DIP&DIP	Spe12|Spe14	GMYN	0.28016	3.67125	0.0763119	2.5e-51	564	133.619	430.381	NA	224	124.702	99.2981	NA	NA	1.08356	1.16351:2.78773:1:1:1:1	0.49734(0.542553:0.409574:0.539894)	NA	NA	NA	NA
Alas	CHI&CHI	Spe04|Spe31	GMYN	0.0129833	0.176285	0.0736495	2.82e-31	1893	571.158	1321.84	NA	104	87	17	NA	NA	0.0622548	5.24634:3.86561:1:1:1:1	0.535394(0.558637:0.458003:0.58954)	NA	NA	NA	NA
Alas	CHI&PAU	Spe02|Spe51	GMYN	0.388028	4.12354	0.0941007	3.76e-52	996	244.217	751.783	NA	430	205.419	224.581	NA	NA	1.30397	1.53663:1.75055:1:1:1:1	0.463353(0.50753:0.394578:0.487952)	NA	NA	NA	NA
Alas	DIP&PAU	Spe12|Spe51	GMYN	0.94838	4.31067	0.220008	5.06e-27	1449	313.426	1135.57	NA	864	265.797	598.203	NA	NA	1.67566	1.14027:1.92605:1:1:1:1	0.523119(0.521739:0.404762:0.642857)	NA	NA	NA	NA
Alas	DIP&DIP	Spe12|Spe47	GMYN	0.126725	3.5697	0.0355001	3.89e-51	546	116.699	429.301	NA	147	97.1751	49.8249	NA	NA	0.862604	1.15859:0.729521:1:1:1:1	0.533883(0.552198:0.401099:0.648352)	NA	NA	NA	NA
Alas	CHI&DIP	Spe04|Spe47	GMYN	0.26282	3.61711	0.0726603	3.46e-52	540	124.314	415.686	NA	209	117.834	91.1657	NA	NA	1.03502	1.00409:2.47354:1:1:1:1	0.536111(0.563889:0.416667:0.627778)	NA	NA	NA	NA
Alas	CHI&DIP	Spe02|Spe47	GMYN	0.984107	3.47415	0.283265	1.75e-07	453	102.74	350.26	NA	272	83.7562	188.244	NA	NA	1.54885	1.34925:0.927956:1:1:1:1	0.475717(0.516556:0.374172:0.536424)	NA	NA	NA	NA
Alas	SYM&PAU	Spe09|Spe10	GMYN	0.453556	4.43813	0.102195	3.62e-74	1566	371.484	1194.52	NA	720	318.53	401.47	NA	NA	1.39877	1.46196:1.35404:1:1:1:1	0.520115(0.537356:0.41092:0.612069)	NA	NA	NA	NA
Alas	CHI&DIP	Spe03|Spe47	GMYN	0.893529	3.48972	0.256046	4.49e-26	453	104.895	348.105	NA	281	104.42	176.58	NA	NA	1.49469	0.784051:1.68076:1:1:1:1	0.450331(0.513245:0.413907:0.423841)	NA	NA	NA	NA
Alas	CHI&DIP	Spe31|Spe42	GMYN	0.170192	4.4065	0.038623	3.43e-145	1455	356.143	1098.86	NA	480	314.048	165.952	NA	NA	1.20712	1.36289:2.44061:1:1:1:1	0.478007(0.551546:0.405155:0.47732)	NA	NA	NA	NA
Alas	CHI&DIP	Spe03|Spe14	GMYN	1.19034	3.42781	0.347259	1.2e-06	465	96.5839	368.416	NA	283	78.9466	204.053	NA	NA	1.65508	0.630149:4.35268:1:1:1:1	0.413978(0.487097:0.429032:0.325806)	NA	NA	NA	NA
Alas	CHI&CHI	Spe02|Spe04	GMYN	1.06681	4.21956	0.252824	8.41e-16	1149	277.573	871.427	NA	713	226.97	486.03	NA	NA	1.82845	1.23676:1.65528:1:1:1:1	0.477372(0.531332:0.421671:0.479112)	NA	NA	NA	NA
Alas	DIP&DIP	Spe42|Spe47	GMYN	0.1473	3.73505	0.0394373	7.73e-64	546	145.484	400.516	NA	182	129.244	52.7559	NA	NA	1.10327	1.4551:4.94048:1:1:1:1	0.486264(0.535714:0.406593:0.516484)	NA	NA	NA	NA
Alas	CHI&PAU	Spe03|Spe51	GMYN	0.373509	4.42441	0.0844201	4.68e-129	1599	364.752	1234.25	NA	707	349.075	357.925	NA	NA	1.29757	1.14706:1.911:1:1:1:1	0.440275(0.482176:0.405253:0.433396)	NA	NA	NA	NA
Alas	CHI&CHI	Spe03|Spe31	GMYN	0.924636	4.49161	0.205859	1.59e-36	1692	398.939	1293.06	NA	1017	342.054	674.946	NA	NA	1.76565	1.3026:1.6414:1:1:1:1	0.455378(0.513298:0.437943:0.414894)	NA	NA	NA	NA
Alas	CHI&DIP	Spe31|Spe47	GMYN	0.256787	3.62308	0.0708752	4.24e-49	540	125.308	414.692	NA	205	115.739	89.2607	NA	NA	1.03794	1.15649:2.49246:1:1:1:1	0.537963(0.569444:0.413889:0.630556)	NA	NA	NA	NA
Alas	CHI&PAU	Spe03|Spe10	GMYN	0.472912	4.54714	0.104002	6.96e-99	1704	429.602	1274.4	NA	830	388.837	441.163	NA	NA	1.50008	1.73845:1.67587:1:1:1:1	0.47007(0.505282:0.432218:0.472711)	NA	NA	NA	NA
Alas	CHI&PAU	Spe04|Spe51	GMYN	0.95005	4.43968	0.213991	1.86e-17	1527	372.251	1154.75	NA	898	287.264	610.736	NA	NA	1.80075	1.5898:1.80482:1:1:1:1	0.521611(0.527505:0.426326:0.611002)	NA	NA	NA	NA
Alas	DIP&PAU	Spe42|Spe51	GMYN	0.931137	4.30973	0.216054	1.59e-30	1341	313.034	1027.97	NA	806	270.445	535.555	NA	NA	1.71981	1.19205:1.81452:1:1:1:1	0.456376(0.498881:0.392617:0.477629)	NA	NA	NA	NA
Alas	SYM&DIP	Spe09|Spe12	GMYN	0.969164	4.38242	0.221148	4.46e-26	1479	344.892	1134.11	NA	894	288.911	605.089	NA	NA	1.76511	1.25219:1.6903:1:1:1:1	0.513523(0.547667:0.406694:0.586207)	NA	NA	NA	NA
Alas	CHI&CHI	Spe03|Spe04	GMYN	0.91589	4.50456	0.203325	3.24e-38	1683	405.888	1277.11	NA	1014	349.784	664.216	NA	NA	1.78137	1.58106:1.6708:1:1:1:1	0.451872(0.502674:0.43672:0.416221)	NA	NA	NA	NA
Alas	CHI&DIP	Spe02|Spe12	GMYN	0.96277	4.14449	0.232301	1.27e-12	969	251.135	717.865	NA	579	196.187	382.813	NA	NA	1.78737	1.74601:1.56185:1:1:1:1	0.478844(0.55418:0.402477:0.479876)	NA	NA	NA	NA
Alas	PAU&CHI	Spe10|Spe31	GMYN	0.906546	4.45862	0.203324	8.94e-27	1605	381.773	1223.23	NA	944	311.23	632.77	NA	NA	1.75146	1.54928:1.82537:1:1:1:1	0.556386(0.558879:0.456075:0.654206)	NA	NA	NA	NA
Alas	CHI&DIP	Spe04|Spe42	GMYN	0.17262	4.38883	0.0393317	1.13e-144	1455	347.849	1107.15	NA	479	309.665	169.335	NA	NA	1.18059	1.14718:2.3241:1:1:1:1	0.476289(0.548454:0.405155:0.475258)	NA	NA	NA	NA
Alas	SYM&DIP	Spe09|Spe42	GMYN	0.918306	4.30207	0.213457	1.48e-23	1329	309.851	1019.15	NA	783	255.025	527.975	NA	NA	1.70722	1.1832:1.61578:1:1:1:1	0.455229(0.523702:0.405192:0.436795)	NA	NA	NA	NA
Arr	CHI&CHI	Spe01|Spe41	GMYN	0.400511	4.21829	0.0949463	1.93e-57	1203	277.103	925.897	NA	515	231.948	283.052	NA	NA	1.27991	1.3668:2.26749:1:1:1:1	0.539485(0.59601:0.362843:0.659601)	NA	NA	NA	NA
Arr	CHI&CHI	Spe03|Spe35	GMYN	0.344094	4.17259	0.0824653	1.14e-101	1218	260.721	957.279	NA	512	251.075	260.925	NA	NA	1.16361	1.11041:1.3804:1:1:1:1	0.431856(0.557882:0.353448:0.384236)	NA	NA	NA	NA
Arr	CHI&CHI	Spe31|Spe34	GMYN	0.722695	4.15544	0.173915	2.24e-26	1020	254.828	765.172	NA	557	209.614	347.386	NA	NA	1.5803	1.33329:2.21223:1:1:1:1	0.457843(0.532353:0.375:0.466176)	NA	NA	NA	NA
Arr	CHI&DIP	Spe39|Spe42	GMYN	0.384306	4.17792	0.0919849	1.78e-56	1134	262.581	871.419	NA	478	219.653	258.347	NA	NA	1.26273	1.27044:1.95706:1:1:1:1	0.436949(0.572751:0.343915:0.39418)	NA	NA	NA	NA
Arr	CHI&CHI	Spe31|Spe41	GMYN	0.711767	4.15906	0.171137	3.71e-20	1020	256.059	763.941	NA	543	198.653	344.347	NA	NA	1.57717	1.34913:2.11071:1:1:1:1	0.486765(0.536765:0.376471:0.547059)	NA	NA	NA	NA
Arr	CHI&CHI	Spe02|Spe34	GMYN	0.0951421	3.74213	0.0254246	1.42e-52	549	146.864	402.136	NA	146	110.198	35.8021	NA	NA	1.07076	2.14155:1.26417:1:1:1:1	0.457195(0.546448:0.371585:0.453552)	NA	NA	NA	NA
Arr	CHI&SYM	Spe41|Spe52	GMYN	0.628957	4.22648	0.148814	2.83e-38	1227	280.144	946.856	NA	632	235.985	396.015	NA	NA	1.45033	1.19404:2.08409:1:1:1:1	0.539935(0.585575:0.376528:0.657702)	NA	NA	NA	NA
Arr	CHI&CHI	Spe34|Spe37	GMYN	0.0496302	3.56807	0.0139095	9.14e-82	495	116.445	378.555	NA	128	109.887	18.1127	NA	NA	0.877319	0.637029:3.04482:1:1:1:1	0.457576(0.575758:0.378788:0.418182)	NA	NA	NA	NA
Arr	DIP&CHI	Spe16|Spe31	GMYN	0.748481	4.12679	0.181371	2.63e-28	1032	245.278	786.722	NA	572	207.617	364.383	NA	NA	1.55141	1.16825:2.05994:1:1:1:1	0.437984(0.536337:0.37936:0.398256)	NA	NA	NA	NA
Arr	SYM&CHI	Spe08|Spe39	GMYN	0.1206	4.23277	0.028492	2.62e-164	1224	282.503	941.497	NA	374	269.727	104.273	NA	NA	1.0697	0.793894:1.45031:1:1:1:1	0.480392(0.584559:0.362745:0.493873)	NA	NA	NA	NA
Arr	CHI&CHI	Spe32|Spe33	GMYN	0.00585197	1.06437	0.00549809	2.26e-52	663	147.09	515.91	NA	77	73.9999	3.00014	NA	NA	0.240689	2.30462:2.17544:1:1:1:1	0.396682(0.531674:0.332579:0.325792)	NA	NA	NA	NA
Arr	CHI&DIP	Spe37|Spe44	GMYN	0.343698	3.5922	0.095679	4.18e-27	489	120.254	368.746	NA	199	98.5634	100.437	NA	NA	1.14256	1.45863:1.80682:1:1:1:1	0.476483(0.564417:0.386503:0.478528)	NA	NA	NA	NA
Arr	DIP&CHI	Spe17|Spe32	GMYN	0.093361	3.76294	0.0248107	2.01e-83	663	150.995	512.005	NA	180	135.239	44.7613	NA	NA	0.929089	1.53469:1.6741:1:1:1:1	0.42006(0.538462:0.332579:0.38914)	NA	NA	NA	NA
Arr	CHI&DIP	Spe34|Spe46	GMYN	0.421334	4.19036	0.100548	4.08e-88	1203	266.972	936.028	NA	553	255.655	297.345	NA	NA	1.25776	0.97387:1.52539:1:1:1:1	0.524106(0.581047:0.372818:0.618454)	NA	NA	NA	NA
Arr	DIP&PAU	Spe11|Spe51	GMYN	0.129555	4.29459	0.0301669	4.05e-135	1320	306.777	1013.22	NA	384	264.122	119.878	NA	NA	1.09754	0.970009:1.33031:1:1:1:1	0.475(0.563636:0.367045:0.494318)	NA	NA	NA	NA
Arr	SYM&CHI	Spe09|Spe35	GMYN	0.0913857	4.18002	0.0218625	3.29e-148	1080	263.317	816.683	NA	311	241.043	69.9573	NA	NA	1.08824	1.62077:2.15977:1:1:1:1	0.441204(0.555556:0.361111:0.406944)	NA	NA	NA	NA
Arr	PAU&CHI	Spe10|Spe35	GMYN	0.0788738	3.70797	0.0212714	9.82e-62	510	140.325	369.675	NA	142	114.41	27.5899	NA	NA	1.07741	1.94117:2.02752:1:1:1:1	0.498039(0.605882:0.402941:0.485294)	NA	NA	NA	NA
Arr	CHI&SYM	Spe32|Spe52	GMYN	0.799266	3.7492	0.213183	5.83e-31	624	148.255	475.745	NA	371	142.264	228.736	NA	NA	1.50013	1.11052:2.05365:1:1:1:1	0.492788(0.572115:0.384615:0.521635)	NA	NA	NA	NA
Arr	CHI&CHI	Spe01|Spe02	GMYN	0.564066	3.58129	0.157503	5.62e-20	516	118.517	397.483	NA	254	100.443	153.557	NA	NA	1.25708	0.72646:2.43561:1:1:1:1	0.52907(0.581395:0.395349:0.610465)	NA	NA	NA	NA
Arr	CHI&DIP	Spe04|Spe50	GMYN	0.390693	3.97765	0.0982221	6.41e-40	816	201.047	614.953	NA	351	165.996	185.004	NA	NA	1.27445	1.30574:1.73745:1:1:1:1	0.507966(0.568015:0.382353:0.573529)	NA	NA	NA	NA
Arr	DIP&DIP	Spe17|Spe50	GMYN	0.0661277	3.11417	0.0212345	2.01e-124	1251	318.579	932.421	NA	294	235.176	58.824	NA	NA	0.84234	1.79923:2.00531:1:1:1:1	0.5004(0.581535:0.368106:0.551559)	NA	NA	NA	NA
Arr	CHI&PAU	Spe02|Spe10	GMYN	0.972413	3.51025	0.277021	2.49e-07	435	107.807	327.193	NA	261	86.7094	174.291	NA	NA	1.60137	0.981056:1.52208:1:1:1:1	0.517241(0.589655:0.396552:0.565517)	NA	NA	NA	NA
Arr	SYM&DIP	Spe08|Spe46	GMYN	0.395309	4.09669	0.0964948	1.58e-68	1203	235.627	967.373	NA	506	213.175	292.825	NA	NA	1.12028	0.821659:1.44686:1:1:1:1	0.558603(0.59601:0.369077:0.710723)	NA	NA	NA	NA
Arr	SYM&DIP	Spe08|Spe49	GMYN	0.401703	4.20394	0.095554	1.29e-67	1182	271.85	910.15	NA	518	239.246	278.754	NA	NA	1.27618	0.874976:1.66086:1:1:1:1	0.484349(0.55203:0.361675:0.53934)	NA	NA	NA	NA
Arr	DIP&CHI	Spe12|Spe41	GMYN	0.0979181	3.3357	0.0293546	7.5e-46	351	85.4219	265.578	NA	101	76.7153	24.2847	NA	NA	0.885889	1.22288:1.23582:1:1:1:1	0.480057(0.57265:0.354701:0.512821)	NA	NA	NA	NA
Arr	DIP&DIP	Spe11|Spe46	GMYN	0.410343	4.17518	0.0982815	1.28e-88	1215	261.623	953.377	NA	548	250.948	297.052	NA	NA	1.22102	0.965848:1.46436:1:1:1:1	0.539506(0.587654:0.366667:0.664198)	NA	NA	NA	NA
Arr	CHI&CHI	Spe35|Spe36	GMYN	0.0408257	1.52226	0.0268192	3.04e-111	1227	311.088	915.912	NA	239	202.663	36.3366	NA	NA	0.416421	1.9494:1.49937:1:1:1:1	0.450693(0.564792:0.359413:0.427873)	NA	NA	NA	NA
Arr	SYM&CHI	Spe08|Spe40	GMYN	0.55085	4.19489	0.131314	3.03e-29	1056	268.592	787.408	NA	510	207.359	302.641	NA	NA	1.47771	1.52178:1.92409:1:1:1:1	0.473011(0.521307:0.359375:0.538352)	NA	NA	NA	NA
Arr	DIP&DIP	Spe16|Spe43	GMYN	0.101266	4.23895	0.0238894	8.65e-150	1248	284.841	963.159	NA	345	254.229	90.7706	NA	NA	1.04564	1.32756:2.1408:1:1:1:1	0.439103(0.579327:0.36899:0.36899)	NA	NA	NA	NA
Arr	DIP&CHI	Spe15|Spe35	GMYN	0.062668	3.20163	0.0195738	9.72e-46	324	71.4385	252.562	NA	80	64.8649	15.1351	NA	NA	0.754774	1.13998:1.53855:1:1:1:1	0.429012(0.518519:0.37963:0.388889)	NA	NA	NA	NA
Arr	CHI&CHI	Spe39|Spe41	GMYN	0.0374326	4.37451	0.00855699	8.12e-162	1224	341.271	882.729	NA	301	268.816	32.1837	NA	NA	1.24668	2.59177:1.97169:1:1:1:1	0.479167(0.578431:0.365196:0.493873)	NA	NA	NA	NA
Arr	CHI&CHI	Spe02|Spe40	GMYN	0.558686	3.40316	0.164167	1.93e-20	387	93.4616	293.538	NA	198	84.8671	113.133	NA	NA	1.24563	0.923366:2.30102:1:1:1:1	0.413437(0.449612:0.368217:0.422481)	NA	NA	NA	NA
Arr	CHI&DIP	Spe41|Spe43	GMYN	0.10538	4.34396	0.0242591	1.84e-153	1308	327.649	980.351	NA	380	284.007	95.9928	NA	NA	1.16713	1.49168:1.58831:1:1:1:1	0.484709(0.573394:0.361239:0.519495)	NA	NA	NA	NA
Arr	CHI&CHI	Spe01|Spe31	GMYN	0.71977	4.13645	0.174007	4.01e-22	1038	248.456	789.544	NA	556	197.341	358.659	NA	NA	1.53759	1.16094:1.74646:1:1:1:1	0.520231(0.569364:0.380058:0.611272)	NA	NA	NA	NA
Arr	DIP&CHI	Spe12|Spe36	GMYN	0.0764536	3.55322	0.0215167	7.89e-35	333	93.7377	239.262	NA	87	69.6875	17.3125	NA	NA	1.05515	2.19224:2.55028:1:1:1:1	0.48048(0.603604:0.333333:0.504505)	NA	NA	NA	NA
Arr	CHI&CHI	Spe35|Spe41	GMYN	0.0617358	4.33	0.0142577	1.45e-139	1224	321.609	902.391	NA	305	251.658	53.3416	NA	NA	1.18323	1.97246:1.82934:1:1:1:1	0.475899(0.572304:0.363971:0.491422)	NA	NA	NA	NA
Arr	SYM&CHI	Spe09|Spe32	GMYN	0.0829416	3.61983	0.0229132	5.07e-68	516	124.765	391.235	NA	141	110.41	30.5903	NA	NA	0.938137	1.98788:2.84845:1:1:1:1	0.406008(0.517442:0.328488:0.372093)	NA	NA	NA	NA
Arr	DIP&SYM	Spe42|Spe52	GMYN	0.670234	4.1788	0.160389	1.35e-35	1095	262.89	832.11	NA	586	224.419	361.581	NA	NA	1.51258	1.00838:1.85132:1:1:1:1	0.509132(0.587671:0.368493:0.571233)	NA	NA	NA	NA
Arr	SYM&DIP	Spe09|Spe45	GMYN	0.0934299	4.19193	0.022288	1.12e-125	1116	267.532	848.468	NA	301	226.837	74.1629	NA	NA	1.07594	0.985477:2.11276:1:1:1:1	0.472222(0.555108:0.357527:0.504032)	NA	NA	NA	NA
Arr	CHI&DIP	Spe39|Spe48	GMYN	0.10399	4.1688	0.024945	2.41e-148	1224	259.406	964.594	NA	332	238.874	93.1263	NA	NA	0.965456	1.0605:2.24848:1:1:1:1	0.428105(0.572304:0.370098:0.341912)	NA	NA	NA	NA
Arr	DIP&CHI	Spe15|Spe36	GMYN	0.0596993	3.23422	0.0184586	0	324	74.6118	249.388	NA	94	79.7312	14.2688	NA	NA	0.79074	1.12825:1.13295:1:1:1:1	0.449074(0.518519:0.37963:0.449074)	NA	NA	NA	NA
Arr	DIP&DIP	Spe16|Spe48	GMYN	0.00841172	0.443248	0.0189775	8.57e-54	1260	302.61	957.39	NA	102	93.999	8.00099	NA	NA	0.112845	3.75285:1.82217:1:1:1:1	0.412302(0.572619:0.372619:0.291667)	NA	NA	NA	NA
Arr	CHI&CHI	Spe33|Spe38	GMYN	0.644021	3.36352	0.191472	6.7e-15	426	88.6499	337.35	NA	220	77.0794	142.921	NA	NA	1.20994	1.08186:1.52986:1:1:1:1	0.415493(0.588028:0.323944:0.334507)	NA	NA	NA	NA
Arr	CHI&SYM	Spe03|Spe08	GMYN	0.379906	4.21952	0.0900353	2.51e-79	1221	277.557	943.443	NA	529	251.568	277.432	NA	NA	1.25273	0.885218:1.25287:1:1:1:1	0.469697(0.566339:0.351351:0.4914)	NA	NA	NA	NA
Arr	DIP&DIP	Spe12|Spe42	GMYN	0.315103	3.14853	0.100079	4.58e-13	249	66.5556	182.444	NA	97	50.5717	46.4283	NA	NA	1.07245	1.1483:1.29244:1:1:1:1	0.47992(0.668675:0.283133:0.487952)	NA	NA	NA	NA
Arr	CHI&PAU	Spe35|Spe51	GMYN	0.114408	4.28653	0.0266902	6.26e-145	1227	303.498	923.502	NA	366	268.459	97.5406	NA	NA	1.14638	1.53136:1.81507:1:1:1:1	0.453138(0.562347:0.366748:0.430318)	NA	NA	NA	NA
Arr	DIP&CHI	Spe12|Spe33	GMYN	0.0618053	3.41115	0.0181186	1.84e-44	333	94.4628	238.537	NA	92	77.8882	14.1118	NA	NA	1.01192	3.10873:2.5136:1:1:1:1	0.448949(0.608108:0.333333:0.405405)	NA	NA	NA	NA
Arr	CHI&DIP	Spe04|Spe16	GMYN	0.409519	3.96918	0.103175	6.23e-39	813	198.787	614.213	NA	356	164.528	191.472	NA	NA	1.27989	1.36849:1.56937:1:1:1:1	0.452645(0.560886:0.385609:0.411439)	NA	NA	NA	NA
Arr	CHI&DIP	Spe04|Spe48	GMYN	0.402865	3.96418	0.101626	1.99e-49	813	197.468	615.532	NA	365	175.421	189.579	NA	NA	1.26786	1.34541:1.46786:1:1:1:1	0.452645(0.557196:0.387454:0.413284)	NA	NA	NA	NA
Arr	SYM&CHI	Spe09|Spe31	GMYN	0.798902	4.18468	0.190911	3.44e-17	1032	264.957	767.043	NA	573	204.175	368.825	NA	NA	1.66817	1.43719:2.309:1:1:1:1	0.462694(0.540698:0.375:0.472384)	NA	NA	NA	NA
Arr	SYM&DIP	Spe08|Spe45	GMYN	0.0956911	4.16749	0.0229613	0	1221	258.955	962.045	NA	349	263.011	85.9891	NA	NA	0.959258	0.602648:1.13213:1:1:1:1	0.507371(0.581081:0.35258:0.588452)	NA	NA	NA	NA
Arr	DIP&CHI	Spe17|Spe39	GMYN	0.0825184	4.34867	0.0189755	6.45e-140	1224	329.715	894.285	NA	337	267.397	69.6035	NA	NA	1.23171	2.2758:2.55187:1:1:1:1	0.465278(0.579657:0.362745:0.453431)	NA	NA	NA	NA
Arr	DIP&PAU	Spe45|Spe51	GMYN	0.128457	4.33299	0.0296464	3.68e-120	1317	322.892	994.108	NA	377	260.231	116.769	NA	NA	1.15929	1.29284:1.65458:1:1:1:1	0.481397(0.560364:0.359909:0.523918)	NA	NA	NA	NA
Arr	CHI&CHI	Spe04|Spe38	GMYN	0.549407	2.21656	0.247865	6.19e-06	252	65.7848	186.215	NA	118	46.7702	71.2298	NA	NA	0.984618	1.25319:1.70505:1:1:1:1	0.446429(0.583333:0.321429:0.434524)	NA	NA	NA	NA
Arr	CHI&PAU	Spe31|Spe51	GMYN	0.801849	4.21575	0.190203	5.25e-17	1032	276.166	755.834	NA	575	211.893	363.107	NA	NA	1.71542	1.7:2.72022:1:1:1:1	0.468992(0.530523:0.37936:0.497093)	NA	NA	NA	NA
Arr	DIP&DIP	Spe11|Spe45	GMYN	0.0137487	0.712932	0.0192848	2.79e-77	1335	377.854	957.146	NA	164	150.98	13.0198	NA	NA	0.211643	2.92581:3.82847:1:1:1:1	0.489513(0.569663:0.35618:0.542697)	NA	NA	NA	NA
Arr	DIP&CHI	Spe17|Spe36	GMYN	0.0941954	4.26652	0.0220778	1.05e-165	1254	295.509	958.491	NA	355	270.482	84.5181	NA	NA	1.07742	1.23826:1.47644:1:1:1:1	0.472488(0.565789:0.361244:0.490431)	NA	NA	NA	NA
Arr	CHI&DIP	Spe36|Spe50	GMYN	0.0798997	4.26353	0.0187403	7.6e-165	1230	294.331	935.669	NA	335	264.326	70.674	NA	NA	1.08101	1.2162:1.79011:1:1:1:1	0.486992(0.57439:0.360976:0.52561)	NA	NA	NA	NA
Arr	CHI&DIP	Spe04|Spe49	GMYN	0.519393	3.9971	0.129943	6.95e-27	804	206.328	597.672	NA	384	163.497	220.503	NA	NA	1.41186	1.66512:2.1816:1:1:1:1	0.477612(0.522388:0.389925:0.520522)	NA	NA	NA	NA
Arr	DIP&DIP	Spe11|Spe49	GMYN	0.42856	4.21243	0.101737	3.41e-71	1206	274.945	931.055	NA	548	248.778	299.222	NA	NA	1.29121	0.936015:1.49684:1:1:1:1	0.46393(0.543532:0.354478:0.493781)	NA	NA	NA	NA
Arr	CHI&CHI	Spe02|Spe36	GMYN	0.0914658	2.10162	0.0435216	1.49e-48	549	156.644	392.356	NA	144	110.355	33.6455	NA	NA	0.665016	2.7657:1.6301:1:1:1:1	0.458106(0.551913:0.368852:0.453552)	NA	NA	NA	NA
Arr	CHI&DIP	Spe33|Spe50	GMYN	0.0823893	4.27099	0.0192904	4.21e-170	1227	297.274	929.726	NA	344	271.722	72.2777	NA	NA	1.09719	1.35492:1.71638:1:1:1:1	0.468623(0.572127:0.359413:0.474328)	NA	NA	NA	NA
Arr	CHI&DIP	Spe38|Spe48	GMYN	0.750908	1.86326	0.403007	0.000165421	423	94.3236	328.676	NA	218	64.8442	153.156	NA	NA	0.998948	1.93017:1.72028:1:1:1:1	0.416076(0.592199:0.340426:0.315603)	NA	NA	NA	NA
Arr	DIP&DIP	Spe42|Spe44	GMYN	0.470178	4.20027	0.11194	5.53e-42	1098	270.523	827.477	NA	503	218.1	284.9	NA	NA	1.38919	1.27474:1.60641:1:1:1:1	0.479053(0.562842:0.362022:0.512295)	NA	NA	NA	NA
Arr	DIP&DIP	Spe46|Spe50	GMYN	0.418257	4.17178	0.100259	5.35e-74	1254	260.439	993.561	NA	553	238.635	314.365	NA	NA	1.19781	1.06419:1.50374:1:1:1:1	0.550638(0.588517:0.376794:0.686603)	NA	NA	NA	NA
Arr	DIP&SYM	Spe46|Spe52	GMYN	0.504267	4.11477	0.12255	9.95e-50	1227	241.377	985.623	NA	567	210.621	356.379	NA	NA	1.21453	1.43262:1.87004:1:1:1:1	0.584352(0.602689:0.389976:0.760391)	NA	NA	NA	NA
Arr	CHI&SYM	Spe40|Spe52	GMYN	0.705039	4.1993	0.167895	2.77e-33	1101	270.173	830.827	NA	602	229.7	372.3	NA	NA	1.56249	1.13689:2.44754:1:1:1:1	0.506358(0.535422:0.385559:0.598093)	NA	NA	NA	NA
Arr	CHI&DIP	Spe34|Spe42	GMYN	0.402116	4.17917	0.0962191	7.05e-68	1137	263.018	873.982	NA	503	234.861	268.139	NA	NA	1.27585	1.2197:1.79143:1:1:1:1	0.441073(0.563325:0.341689:0.418206)	NA	NA	NA	NA
Arr	SYM&DIP	Spe09|Spe43	GMYN	0.0930939	4.20619	0.0221326	5.55e-121	1113	272.666	840.334	NA	299	225.763	73.237	NA	NA	1.10073	1.35792:1.82322:1:1:1:1	0.454627(0.563342:0.363881:0.436658)	NA	NA	NA	NA
Arr	CHI&DIP	Spe35|Spe49	GMYN	0.429381	4.20453	0.102123	2.35e-43	1197	272.065	924.935	NA	512	214.406	297.594	NA	NA	1.28743	1.16759:1.63844:1:1:1:1	0.44528(0.541353:0.362155:0.432331)	NA	NA	NA	NA
Arr	CHI&DIP	Spe02|Spe11	GMYN	0.109546	3.73697	0.0293142	3.4e-53	549	145.856	403.144	NA	154	113.086	40.9144	NA	NA	1.07327	1.91566:1.4549:1:1:1:1	0.479964(0.568306:0.36612:0.505464)	NA	NA	NA	NA
Arr	CHI&CHI	Spe36|Spe39	GMYN	0.0531319	4.31914	0.0123015	2.66e-134	1224	316.987	907.013	NA	285	238.579	46.4212	NA	NA	1.15793	2.08192:1.69935:1:1:1:1	0.455065(0.571078:0.362745:0.431373)	NA	NA	NA	NA
Arr	CHI&DIP	Spe41|Spe50	GMYN	0.096469	4.3276	0.0222916	4.9e-154	1293	320.58	972.42	NA	365	277.389	87.6113	NA	NA	1.14551	1.78168:2.05481:1:1:1:1	0.510828(0.573086:0.364269:0.595128)	NA	NA	NA	NA
Arr	CHI&CHI	Spe02|Spe39	GMYN	0.0164956	0.613429	0.0268908	2.27e-29	546	169.878	376.122	NA	69	62.8987	6.10129	NA	NA	0.202221	4.21093:1.79339:1:1:1:1	0.461538(0.56044:0.370879:0.453297)	NA	NA	NA	NA
Arr	DIP&DIP	Spe15|Spe17	GMYN	0.0586289	2.19286	0.0267363	2.81e-33	324	89.9886	234.011	NA	77	63.8653	13.1347	NA	NA	0.651395	3.49971:4.60476:1:1:1:1	0.439815(0.518519:0.37963:0.421296)	NA	NA	NA	NA
Arr	DIP&DIP	Spe44|Spe46	GMYN	0.258566	4.16762	0.0620416	4.73e-86	1242	258.999	983.001	NA	439	225.997	213.003	NA	NA	1.07374	1.27895:1.66903:1:1:1:1	0.559984(0.57971:0.387681:0.71256)	NA	NA	NA	NA
Arr	CHI&PAU	Spe01|Spe51	GMYN	0.427597	4.27425	0.10004	1.52e-62	1209	298.569	910.431	NA	549	256.59	292.41	NA	NA	1.37755	1.24087:2.0105:1:1:1:1	0.516956(0.58933:0.362283:0.599256)	NA	NA	NA	NA
Arr	PAU&DIP	Spe10|Spe44	GMYN	0.293418	3.56748	0.0822481	2.19e-48	504	116.354	387.646	NA	205	111.876	93.1241	NA	NA	1.04927	1.06115:0.825521:1:1:1:1	0.525794(0.589286:0.392857:0.595238)	NA	NA	NA	NA
Arr	CHI&SYM	Spe02|Spe09	GMYN	0.0647619	3.44397	0.0188044	0	402	98.6882	303.312	NA	121	102.255	18.7446	NA	NA	0.894335	1.11025:2.48153:1:1:1:1	0.437811(0.514925:0.347015:0.451493)	NA	NA	NA	NA
Arr	CHI&PAU	Spe04|Spe10	GMYN	0.481446	3.2202	0.149508	2.45e-12	294	73.2297	220.77	NA	137	59.7462	77.2538	NA	NA	1.16362	0.810857:1.47091:1:1:1:1	0.542517(0.596939:0.428571:0.602041)	NA	NA	NA	NA
Arr	CHI&CHI	Spe31|Spe38	GMYN	0.726621	2.21149	0.328567	0.000137563	276	75.5985	200.401	NA	145	53.7273	91.2727	NA	NA	1.13334	1.27118:2.55585:1:1:1:1	0.463768(0.581522:0.369565:0.440217)	NA	NA	NA	NA
Arr	CHI&DIP	Spe02|Spe48	GMYN	0.12488	3.63787	0.0343277	3.38e-66	549	127.803	421.197	NA	165	116.798	48.2023	NA	NA	0.942677	1.30067:1.4633:1:1:1:1	0.432605(0.54918:0.360656:0.387978)	NA	NA	NA	NA
Arr	CHI&DIP	Spe04|Spe44	GMYN	0.415698	3.9207	0.106026	1.23e-38	804	186.346	617.654	NA	351	156.676	194.324	NA	NA	1.22806	0.81867:1.60234:1:1:1:1	0.506219(0.548507:0.38806:0.58209)	NA	NA	NA	NA
Arr	CHI&CHI	Spe39|Spe40	GMYN	0.537096	4.17436	0.128665	2.5e-36	1065	261.337	803.663	NA	515	212.558	302.442	NA	NA	1.42963	1.41235:2.3725:1:1:1:1	0.43662(0.515493:0.356338:0.438028)	NA	NA	NA	NA
Arr	CHI&CHI	Spe02|Spe31	GMYN	0.961891	3.43735	0.279835	1.5e-05	372	97.8199	274.18	NA	215	74.0759	140.924	NA	NA	1.61283	1.51595:3.93104:1:1:1:1	0.469086(0.53629:0.375:0.495968)	NA	NA	NA	NA
Arr	CHI&PAU	Spe34|Spe51	GMYN	0.100275	4.26051	0.0235359	6.75e-170	1236	293.148	942.852	NA	363	274.895	88.105	NA	NA	1.08698	1.13746:1.69597:1:1:1:1	0.456311(0.558252:0.370146:0.440534)	NA	NA	NA	NA
Arr	CHI&DIP	Spe31|Spe44	GMYN	0.789742	2.50636	0.315095	3.04e-12	1032	259.25	772.75	NA	557	187.56	369.44	NA	NA	1.22098	1.53884:2.2815:1:1:1:1	0.491764(0.530523:0.385174:0.559593)	NA	NA	NA	NA
Arr	CHI&DIP	Spe03|Spe45	GMYN	0.34626	4.23754	0.0817126	1.74e-85	1257	284.305	972.695	NA	523	256.48	266.52	NA	NA	1.22638	1.08174:1.19426:1:1:1:1	0.458632(0.553699:0.350835:0.47136)	NA	NA	NA	NA
Arr	CHI&DIP	Spe36|Spe49	GMYN	0.429636	4.21833	0.10185	4.91e-53	1200	277.118	922.882	NA	528	230.648	297.352	NA	NA	1.30456	1.12504:1.67661:1:1:1:1	0.460833(0.54125:0.36625:0.475)	NA	NA	NA	NA
Arr	CHI&DIP	Spe38|Spe45	GMYN	0.793618	3.55223	0.223414	1.15e-07	444	114.012	329.988	NA	245	86.4418	158.558	NA	NA	1.50199	1.72296:1.68463:1:1:1:1	0.468468(0.611486:0.351351:0.442568)	NA	NA	NA	NA
Arr	CHI&DIP	Spe02|Spe46	GMYN	0.522848	3.491	0.14977	3.86e-30	531	105.074	425.926	NA	257	99.8113	157.189	NA	NA	1.11018	0.731623:1.48171:1:1:1:1	0.556497(0.576271:0.392655:0.700565)	NA	NA	NA	NA
Arr	DIP&DIP	Spe45|Spe50	GMYN	0.107812	4.2858	0.0251555	3.7e-151	1326	303.203	1022.8	NA	370	267.812	102.188	NA	NA	1.06315	1.02711:1.64552:1:1:1:1	0.503394(0.571267:0.361991:0.576923)	NA	NA	NA	NA
Arr	DIP&PAU	Spe49|Spe51	GMYN	0.409116	4.24521	0.0963711	2.18e-61	1206	287.23	918.77	NA	530	244.597	285.403	NA	NA	1.32275	1.03989:1.75481:1:1:1:1	0.45937(0.542289:0.359453:0.476368)	NA	NA	NA	NA
Arr	CHI&DIP	Spe33|Spe48	GMYN	0.124741	4.19147	0.0297607	1.04e-117	1227	267.369	959.631	NA	336	226.361	109.639	NA	NA	1.0109	1.69135:2.2579:1:1:1:1	0.417685(0.561125:0.361858:0.330073)	NA	NA	NA	NA
Arr	DIP&SYM	Spe11|Spe52	GMYN	0.628232	4.24933	0.147843	3.01e-41	1188	288.811	899.189	NA	622	246.077	375.923	NA	NA	1.50855	1.16126:1.79713:1:1:1:1	0.52399(0.588384:0.380051:0.603535)	NA	NA	NA	NA
Arr	PAU&DIP	Spe10|Spe45	GMYN	0.113634	3.67276	0.0309398	8.6e-60	522	133.89	388.11	NA	155	114.298	40.7019	NA	NA	1.02653	1.58112:1.59559:1:1:1:1	0.537356(0.600575:0.402299:0.609195)	NA	NA	NA	NA
Arr	CHI&PAU	Spe01|Spe10	GMYN	0.288828	3.52529	0.0819302	7.35e-39	495	109.99	385.01	NA	191	99.5	91.5	NA	NA	1.00798	1.35309:0.979632:1:1:1:1	0.541414(0.606061:0.363636:0.654545)	NA	NA	NA	NA
Arr	CHI&DIP	Spe38|Spe49	GMYN	0.739703	3.34953	0.220837	4.8e-07	414	105.015	308.985	NA	220	77.8558	142.144	NA	NA	1.40171	2.02444:2.05229:1:1:1:1	0.456522(0.583333:0.369565:0.416667)	NA	NA	NA	NA
Arr	DIP&CHI	Spe12|Spe31	GMYN	0.527592	3.26937	0.161374	3e-12	315	78.1915	236.808	NA	152	63.877	88.123	NA	NA	1.20818	1.15699:1.58296:1:1:1:1	0.474603(0.557143:0.347619:0.519048)	NA	NA	NA	NA
Arr	DIP&CHI	Spe11|Spe32	GMYN	0.11911	3.78018	0.0315091	2.65e-69	663	154.507	508.493	NA	187	131.275	55.7246	NA	NA	0.972295	1.45478:1.50527:1:1:1:1	0.432881(0.549774:0.330317:0.418552)	NA	NA	NA	NA
Arr	DIP&DIP	Spe12|Spe48	GMYN	0.0879945	3.27038	0.0269065	5.23e-37	333	78.2968	254.703	NA	86	64.9251	21.0749	NA	NA	0.836255	1.06221:0.863582:1:1:1:1	0.454955(0.599099:0.346847:0.418919)	NA	NA	NA	NA
Arr	CHI&CHI	Spe36|Spe41	GMYN	0.060019	4.27754	0.0140312	9.69e-152	1230	299.883	930.117	NA	302	248.51	53.4904	NA	NA	1.08828	1.35715:1.73461:1:1:1:1	0.49065(0.571951:0.363415:0.536585)	NA	NA	NA	NA
Arr	CHI&CHI	Spe35|Spe40	GMYN	0.516165	4.17958	0.123497	1.45e-36	1065	263.163	801.837	NA	506	211.988	294.012	NA	NA	1.4214	1.62307:2.29734:1:1:1:1	0.431925(0.512676:0.356338:0.426761)	NA	NA	NA	NA
Arr	CHI&CHI	Spe31|Spe40	GMYN	0.742179	4.15668	0.178551	3.22e-22	1020	255.247	764.753	NA	558	204.201	353.799	NA	NA	1.59663	1.46469:2.13949:1:1:1:1	0.453431(0.480882:0.379412:0.5)	NA	NA	NA	NA
Arr	CHI&DIP	Spe31|Spe50	GMYN	0.699669	4.16067	0.168163	4.94e-22	1020	256.612	763.388	NA	543	201.972	341.028	NA	NA	1.57039	1.40718:2.03846:1:1:1:1	0.490196(0.545588:0.377941:0.547059)	NA	NA	NA	NA
Arr	CHI&DIP	Spe03|Spe15	GMYN	0.311126	3.22147	0.0965786	3.51e-23	324	73.354	250.646	NA	128	64.8509	63.1491	NA	NA	0.970032	1.24196:0.970534:1:1:1:1	0.430556(0.527778:0.37963:0.384259)	NA	NA	NA	NA
Arr	DIP&DIP	Spe44|Spe50	GMYN	0.451977	4.22758	0.106912	6.35e-56	1242	280.554	961.446	NA	560	238.419	321.581	NA	NA	1.30484	0.958702:1.33511:1:1:1:1	0.51409(0.565217:0.38285:0.594203)	NA	NA	NA	NA
Arr	PAU&DIP	Spe10|Spe42	GMYN	0.347495	3.51645	0.0988199	5.08e-32	429	108.701	320.299	NA	186	97.8154	88.1846	NA	NA	1.15045	1.16131:1.01278:1:1:1:1	0.506993(0.63986:0.367133:0.513986)	NA	NA	NA	NA
Arr	CHI&DIP	Spe31|Spe49	GMYN	0.789213	4.15056	0.190146	2.18e-15	1035	253.174	781.826	NA	561	190.979	370.021	NA	NA	1.61144	1.28779:2.80868:1:1:1:1	0.461353(0.505797:0.384058:0.494203)	NA	NA	NA	NA
Arr	CHI&DIP	Spe35|Spe50	GMYN	0.0892863	4.25743	0.0209719	6.75e-172	1227	291.946	935.054	NA	350	271.607	78.3935	NA	NA	1.08103	1.15641:1.69397:1:1:1:1	0.474328(0.577017:0.361858:0.484108)	NA	NA	NA	NA
Arr	CHI&DIP	Spe03|Spe17	GMYN	0.338912	4.20975	0.0805065	1.94e-79	1209	273.964	935.036	NA	496	243.927	252.073	NA	NA	1.21606	1.09217:1.29955:1:1:1:1	0.456989(0.557072:0.361042:0.452854)	NA	NA	NA	NA
Arr	CHI&CHI	Spe04|Spe40	GMYN	0.666455	3.9974	0.166722	7.25e-19	819	206.409	612.591	NA	428	161.776	266.224	NA	NA	1.50594	1.48317:1.48077:1:1:1:1	0.467033(0.501832:0.375458:0.52381)	NA	NA	NA	NA
Arr	CHI&DIP	Spe34|Spe45	GMYN	0.0957405	4.2527	0.0225129	7.29e-140	1242	290.11	951.89	NA	334	248.857	85.1428	NA	NA	1.06674	1.00707:1.70559:1:1:1:1	0.475443(0.570048:0.359903:0.496377)	NA	NA	NA	NA
Arr	DIP&DIP	Spe42|Spe45	GMYN	0.390028	4.21318	0.0925732	6.27e-56	1125	275.222	849.778	NA	484	228.973	255.027	NA	NA	1.32533	1.26937:1.71125:1:1:1:1	0.468889(0.574667:0.337333:0.494667)	NA	NA	NA	NA
Arr	DIP&DIP	Spe45|Spe46	GMYN	0.404503	4.14716	0.0975374	5.17e-83	1215	252.029	962.971	NA	536	238.988	297.012	NA	NA	1.18085	1.05378:1.4164:1:1:1:1	0.550617(0.588889:0.366667:0.696296)	NA	NA	NA	NA
Arr	CHI&DIP	Spe02|Spe16	GMYN	0.11191	3.7008	0.0302395	1.44e-56	549	138.99	410.01	NA	156	113.57	42.4302	NA	NA	1.0205	2.25921:1.71312:1:1:1:1	0.428051(0.551913:0.360656:0.371585)	NA	NA	NA	NA
Arr	DIP&DIP	Spe17|Spe42	GMYN	0.35545	4.20296	0.0845714	1.52e-68	1110	271.495	838.505	NA	470	235.571	234.429	NA	NA	1.29651	1.32664:1.83519:1:1:1:1	0.461261(0.571622:0.339189:0.472973)	NA	NA	NA	NA
Arr	CHI&CHI	Spe03|Spe37	GMYN	0.30955	3.53982	0.0874479	1.88e-41	489	112.141	376.859	NA	199	104.415	94.5848	NA	NA	1.05034	1.45452:1.4789:1:1:1:1	0.43865(0.567485:0.355828:0.392638)	NA	NA	NA	NA
Arr	CHI&DIP	Spe03|Spe43	GMYN	0.357102	4.23861	0.0842498	3.81e-67	1257	284.712	972.288	NA	514	240.885	273.115	NA	NA	1.23627	1.2155:1.23629:1:1:1:1	0.442721(0.560859:0.353222:0.414081)	NA	NA	NA	NA
Arr	CHI&DIP	Spe36|Spe42	GMYN	0.410028	4.19098	0.0978358	8.94e-68	1137	267.193	869.807	NA	509	238.16	270.84	NA	NA	1.29855	1.19047:1.80177:1:1:1:1	0.448109(0.563325:0.341689:0.439314)	NA	NA	NA	NA
Arr	SYM&DIP	Spe08|Spe15	GMYN	0.0962696	3.23468	0.0297617	0	324	74.6576	249.342	NA	102	79.5773	22.4227	NA	NA	0.819437	0.736995:1.24756:1:1:1:1	0.473765(0.527778:0.37037:0.523148)	NA	NA	NA	NA
Arr	CHI&DIP	Spe01|Spe42	GMYN	0.452822	4.21128	0.107526	2.07e-58	1119	274.526	844.474	NA	523	239.975	283.025	NA	NA	1.37489	1.28679:1.66563:1:1:1:1	0.49866(0.595174:0.345845:0.55496)	NA	NA	NA	NA
Arr	CHI&DIP	Spe35|Spe42	GMYN	0.409225	4.15541	0.09848	4.79e-68	1137	254.818	882.182	NA	504	229.989	274.011	NA	NA	1.2488	1.10989:1.80881:1:1:1:1	0.433157(0.565963:0.33905:0.394459)	NA	NA	NA	NA
Arr	DIP&DIP	Spe43|Spe46	GMYN	0.408474	4.18962	0.0974967	2.46e-79	1218	266.709	951.291	NA	543	247.492	295.508	NA	NA	1.23644	0.917018:1.46931:1:1:1:1	0.53243(0.587438:0.369458:0.640394)	NA	NA	NA	NA
Arr	PAU&DIP	Spe10|Spe17	GMYN	0.110004	2.42119	0.0454337	4.37e-43	510	139.244	370.756	NA	138	100.294	37.7055	NA	NA	0.741019	2.02894:2.66242:1:1:1:1	0.532353(0.611765:0.402941:0.582353)	NA	NA	NA	NA
Arr	SYM&PAU	Spe09|Spe51	GMYN	0.0979252	4.16429	0.0235154	5.1e-131	1107	257.854	849.146	NA	304	226.344	77.6558	NA	NA	1.0451	1.03947:1.04096:1:1:1:1	0.460253(0.552846:0.367209:0.460705)	NA	NA	NA	NA
Arr	SYM&DIP	Spe08|Spe43	GMYN	0.12762	4.23462	0.0301374	1.21e-152	1227	283.2	943.8	NA	375	264.864	110.136	NA	NA	1.07554	0.876889:1.28686:1:1:1:1	0.490628(0.58802:0.358191:0.525672)	NA	NA	NA	NA
Arr	DIP&DIP	Spe16|Spe42	GMYN	0.367636	4.13809	0.0888418	2.8e-66	1137	249.001	887.999	NA	473	218.345	254.655	NA	NA	1.19336	1.31677:1.85404:1:1:1:1	0.416007(0.563325:0.343008:0.341689)	NA	NA	NA	NA
Arr	DIP&DIP	Spe12|Spe45	GMYN	0.123717	3.40424	0.0363421	1.97e-39	339	93.5957	245.404	NA	107	79.3132	27.6868	NA	NA	1.02945	2:2:1:1:1:1	0.489676(0.59292:0.340708:0.535398)	NA	NA	NA	NA
Arr	CHI&CHI	Spe02|Spe33	GMYN	0.103712	1.91398	0.0541866	1.75e-43	549	154.677	394.323	NA	145	106.967	38.0326	NA	NA	0.613742	3.27811:1.71057:1:1:1:1	0.43898(0.551913:0.360656:0.404372)	NA	NA	NA	NA
Arr	CHI&DIP	Spe31|Spe45	GMYN	0.729032	4.18632	0.174146	4.04e-24	1032	265.537	766.463	NA	564	213.643	350.357	NA	NA	1.6186	1.41217:2.20824:1:1:1:1	0.485465(0.537791:0.375:0.543605)	NA	NA	NA	NA
Arr	CHI&DIP	Spe03|Spe49	GMYN	0.424095	4.19414	0.101116	2.86e-67	1185	268.322	916.678	NA	532	239.341	292.659	NA	NA	1.27775	1.19443:1.50428:1:1:1:1	0.439662(0.531646:0.355696:0.431646)	NA	NA	NA	NA
Arr	DIP&CHI	Spe12|Spe35	GMYN	0.0642992	2.08936	0.0307745	2.96e-34	333	102.041	230.959	NA	86	71.8103	14.1897	NA	NA	0.684837	4.04219:3.23291:1:1:1:1	0.457958(0.608108:0.333333:0.432432)	NA	NA	NA	NA
Arr	CHI&CHI	Spe02|Spe38	GMYN	0.746201	3.45499	0.215978	6.25e-12	408	100.149	307.851	NA	227	84.1889	142.811	NA	NA	1.41111	1.61015:1.61386:1:1:1:1	0.442402(0.569853:0.345588:0.411765)	NA	NA	NA	NA
Arr	DIP&DIP	Spe17|Spe43	GMYN	0.0497566	4.27019	0.0116521	1.3e-154	1257	296.959	960.041	NA	289	242.914	46.086	NA	NA	1.04681	1.02422:2.08198:1:1:1:1	0.478123(0.582339:0.367542:0.484487)	NA	NA	NA	NA
Arr	DIP&PAU	Spe16|Spe51	GMYN	0.129071	4.19236	0.0307872	3.71e-167	1245	267.685	977.315	NA	377	261.878	115.122	NA	NA	1.00271	0.682941:1.78257:1:1:1:1	0.437349(0.562651:0.373494:0.375904)	NA	NA	NA	NA
Arr	CHI&DIP	Spe40|Spe44	GMYN	0.633073	4.23273	0.149566	2.81e-33	1161	282.49	878.51	NA	601	231.497	369.503	NA	NA	1.50893	1.26539:1.82852:1:1:1:1	0.479328(0.511628:0.383721:0.542636)	NA	NA	NA	NA
Arr	DIP&CHI	Spe17|Spe31	GMYN	0.708	4.15923	0.170224	4.23e-24	1020	256.117	763.883	NA	549	205.94	343.06	NA	NA	1.57459	1.33619:2.13115:1:1:1:1	0.479412(0.541176:0.377941:0.519118)	NA	NA	NA	NA
Arr	DIP&SYM	Spe49|Spe52	GMYN	0.497894	4.21074	0.118244	7.27e-58	1185	274.327	910.673	NA	568	242.509	325.491	NA	NA	1.35742	0.997018:2.19367:1:1:1:1	0.51308(0.558228:0.383544:0.597468)	NA	NA	NA	NA
Arr	CHI&SYM	Spe04|Spe08	GMYN	0.361777	3.97855	0.0909317	1.1e-42	813	201.288	611.712	NA	339	165.606	173.394	NA	NA	1.25724	1.34701:1.99639:1:1:1:1	0.504305(0.557196:0.372694:0.583026)	NA	NA	NA	NA
Arr	DIP&CHI	Spe11|Spe37	GMYN	0.0651246	3.60418	0.0180692	1.3e-61	495	122.19	372.81	NA	125	101.856	23.1439	NA	NA	0.938733	1.13075:2.50199:1:1:1:1	0.462626(0.581818:0.381818:0.424242)	NA	NA	NA	NA
Arr	SYM&CHI	Spe08|Spe32	GMYN	0.159051	3.75577	0.0423485	0	663	149.56	513.44	NA	235	162.052	72.9479	NA	NA	0.970399	0.768642:1.8327:1:1:1:1	0.449472(0.554299:0.334842:0.459276)	NA	NA	NA	NA
Arr	DIP&DIP	Spe15|Spe46	GMYN	0.437183	3.22476	0.135571	1.22e-20	321	73.676	247.324	NA	148	67.1456	80.8544	NA	NA	1.07699	1.26102:1.5289:1:1:1:1	0.537383(0.551402:0.411215:0.649533)	NA	NA	NA	NA
Arr	PAU&DIP	Spe10|Spe12	GMYN	0.0568948	3.3793	0.0168363	3.02e-41	330	90.535	239.465	NA	85	71.9041	13.0959	NA	NA	0.968392	1.89293:0.967024:1:1:1:1	0.515152(0.636364:0.340909:0.568182)	NA	NA	NA	NA
Arr	SYM&DIP	Spe08|Spe48	GMYN	0.149367	4.22877	0.0353216	0	1227	281.003	945.997	NA	415	287.789	127.211	NA	NA	1.08362	0.802464:1.53823:1:1:1:1	0.463733(0.577017:0.364303:0.449878)	NA	NA	NA	NA
Arr	DIP&CHI	Spe11|Spe39	GMYN	0.0812212	4.21956	0.0192487	3.98e-150	1224	277.572	946.428	NA	316	243.39	72.6097	NA	NA	1.01969	0.978618:1.16161:1:1:1:1	0.461601(0.577206:0.360294:0.447304)	NA	NA	NA	NA
Arr	DIP&SYM	Spe44|Spe52	GMYN	0.552333	4.21908	0.130913	6.46e-43	1203	277.393	925.607	NA	588	232.328	355.672	NA	NA	1.39783	1.21:2.15009:1:1:1:1	0.54655(0.586035:0.390274:0.663342)	NA	NA	NA	NA
Arr	SYM&CHI	Spe08|Spe35	GMYN	0.132902	4.24591	0.0313012	7.31e-148	1227	287.498	939.502	NA	379	265.318	113.682	NA	NA	1.09662	0.886816:1.66544:1:1:1:1	0.476773(0.579462:0.359413:0.491443)	NA	NA	NA	NA
Arr	CHI&DIP	Spe03|Spe48	GMYN	0.354945	4.1518	0.0854918	8.19e-70	1203	253.593	949.407	NA	488	222.825	265.175	NA	NA	1.15532	1.31893:1.55215:1:1:1:1	0.416459(0.557357:0.355362:0.336658)	NA	NA	NA	NA
Arr	SYM&DIP	Spe08|Spe50	GMYN	0.125472	4.19214	0.0299303	5.15e-154	1230	267.608	962.392	NA	364	253.447	110.553	NA	NA	1.01025	0.792723:1.17195:1:1:1:1	0.510976(0.581707:0.362195:0.589024)	NA	NA	NA	NA
Arr	CHI&DIP	Spe34|Spe43	GMYN	0.0886163	4.17658	0.0212174	2.41e-191	1242	262.114	979.886	NA	341	259.432	81.5682	NA	NA	0.951349	0.666093:1.20809:1:1:1:1	0.458132(0.576087:0.363527:0.434783)	NA	NA	NA	NA
Arr	DIP&DIP	Spe12|Spe44	GMYN	0.378096	3.3407	0.113179	7.3e-17	345	85.9933	259.007	NA	144	68.0651	75.9349	NA	NA	1.11654	1.51542:0.949491:1:1:1:1	0.47971(0.573913:0.33913:0.526087)	NA	NA	NA	NA
Arr	CHI&PAU	Spe37|Spe51	GMYN	0.0700393	3.55414	0.0197064	1.67e-72	495	114.304	380.696	NA	131	105.639	25.3607	NA	NA	0.874577	0.710952:1.78751:1:1:1:1	0.465657(0.566667:0.390909:0.439394)	NA	NA	NA	NA
Arr	CHI&DIP	Spe04|Spe12	GMYN	0.536345	1.66164	0.322781	0.00281903	111	31.6495	79.3505	NA	51	21.1475	29.8525	NA	NA	0.857201	1.29254:1.83173:1:1:1:1	0.468468(0.567568:0.337838:0.5)	NA	NA	NA	NA
Arr	CHI&DIP	Spe41|Spe48	GMYN	0.120145	4.28739	0.028023	1.08e-137	1239	303.844	935.156	NA	368	264.877	103.123	NA	NA	1.14209	1.39698:2.20971:1:1:1:1	0.462873(0.572639:0.368039:0.447942)	NA	NA	NA	NA
Arr	PAU&SYM	Spe51|Spe52	GMYN	0.674902	4.29613	0.157096	7.56e-40	1221	307.406	913.594	NA	661	262.089	398.911	NA	NA	1.5866	1.23147:2.21349:1:1:1:1	0.520066(0.576167:0.386978:0.597052)	NA	NA	NA	NA
Arr	CHI&CHI	Spe04|Spe34	GMYN	0.397667	3.99174	0.0996223	1.55e-47	813	204.859	608.141	NA	363	177.84	185.16	NA	NA	1.3033	1.35554:2.04928:1:1:1:1	0.47294(0.54797:0.378229:0.49262)	NA	NA	NA	NA
Arr	DIP&DIP	Spe15|Spe43	GMYN	0.0411948	3.21416	0.0128166	4.36e-43	324	72.6425	251.357	NA	71	60.9419	10.0581	NA	NA	0.752591	1.30016:1.30576:1:1:1:1	0.416667(0.518519:0.37037:0.361111)	NA	NA	NA	NA
Arr	CHI&DIP	Spe03|Spe12	GMYN	0.286704	3.2037	0.0894916	0	345	71.6358	273.364	NA	136	71.7886	64.2114	NA	NA	0.892388	0.53209:1.29351:1:1:1:1	0.437681(0.552174:0.330435:0.430435)	NA	NA	NA	NA
Arr	CHI&DIP	Spe01|Spe50	GMYN	0.4198	4.19557	0.100058	1.09e-53	1209	268.833	940.167	NA	523	224.77	298.23	NA	NA	1.25938	1.15342:1.72075:1:1:1:1	0.537221(0.599256:0.361042:0.651365)	NA	NA	NA	NA
Arr	CHI&CHI	Spe04|Spe35	GMYN	0.388908	3.98339	0.0976326	8.26e-50	813	202.589	610.411	NA	360	177.167	182.833	NA	NA	1.28461	1.40146:1.92957:1:1:1:1	0.463715(0.542435:0.376384:0.472325)	NA	NA	NA	NA
Arr	CHI&DIP	Spe04|Spe45	GMYN	0.376541	3.98339	0.0945277	5.2e-60	816	202.591	613.409	NA	366	186.473	179.527	NA	NA	1.27203	1.39369:1.68825:1:1:1:1	0.503064(0.553309:0.378676:0.577206)	NA	NA	NA	NA
Arr	CHI&DIP	Spe40|Spe46	GMYN	0.615871	4.15435	0.148247	7.06e-43	1104	254.458	849.542	NA	575	223.468	351.532	NA	NA	1.43145	1.41991:1.87:1:1:1:1	0.515851(0.535326:0.375:0.637228)	NA	NA	NA	NA
Arr	DIP&DIP	Spe42|Spe49	GMYN	0.505668	4.21055	0.120096	4.57e-37	1113	274.255	838.745	NA	521	217.94	303.06	NA	NA	1.41859	1.64978:2.13385:1:1:1:1	0.445193(0.544474:0.346361:0.444744)	NA	NA	NA	NA
Arr	SYM&CHI	Spe09|Spe38	GMYN	0.606038	1.48926	0.40694	0.000812557	288	77.1699	210.83	NA	135	48.5887	86.4113	NA	NA	0.842698	1.84446:1.73321:1:1:1:1	0.4375(0.59375:0.333333:0.385417)	NA	NA	NA	NA
Arr	CHI&PAU	Spe41|Spe51	GMYN	0.162761	4.33101	0.0375803	1e-148	1332	322.043	1009.96	NA	442	295.037	146.963	NA	NA	1.17053	1.26923:1.19527:1:1:1:1	0.488363(0.554054:0.376126:0.53491)	NA	NA	NA	NA
Arr	SYM&CHI	Spe09|Spe36	GMYN	0.092273	4.15563	0.0222043	7.36e-155	1080	254.894	825.106	NA	312	240.648	71.3523	NA	NA	1.05128	1.09304:1.95028:1:1:1:1	0.460185(0.556944:0.358333:0.465278)	NA	NA	NA	NA
Arr	CHI&CHI	Spe40|Spe41	GMYN	0.584903	4.29848	0.136072	1.22e-34	1233	308.372	924.628	NA	614	244.629	369.371	NA	NA	1.51366	1.38535:2.1451:1:1:1:1	0.475669(0.504866:0.384428:0.537713)	NA	NA	NA	NA
Arr	DIP&PAU	Spe17|Spe51	GMYN	0.11238	4.3195	0.0260169	1.05e-142	1242	317.137	924.863	NA	371	274.843	96.1573	NA	NA	1.18664	1.66808:1.40189:1:1:1:1	0.479871(0.571256:0.369565:0.498792)	NA	NA	NA	NA
Arr	DIP&DIP	Spe11|Spe15	GMYN	0.074928	2.71993	0.0275478	3.36e-31	324	81.9281	242.072	NA	77	59.8112	17.1888	NA	NA	0.743755	1.4111:2.14776:1:1:1:1	0.455247(0.518519:0.375:0.472222)	NA	NA	NA	NA
Arr	SYM&CHI	Spe08|Spe38	GMYN	0.811619	3.50968	0.231251	7.09e-10	429	107.725	321.275	NA	244	87.9721	156.028	NA	NA	1.48912	1.19612:1.88112:1:1:1:1	0.47669(0.611888:0.346154:0.472028)	NA	NA	NA	NA
Arr	CHI&DIP	Spe40|Spe48	GMYN	0.553249	4.13218	0.133888	6.83e-35	1062	247.046	814.954	NA	515	202.023	312.977	NA	NA	1.38579	1.2777:2.06513:1:1:1:1	0.422787(0.516949:0.364407:0.387006)	NA	NA	NA	NA
Arr	PAU&DIP	Spe10|Spe15	GMYN	1.05685	1.83163	0.576998	0.423591	285	78.7172	206.283	NA	162	47.826	114.174	NA	NA	1.27084	1.899:1.03069:1:1:1:1	0.485965(0.589474:0.357895:0.510526)	NA	NA	NA	NA
Arr	CHI&CHI	Spe02|Spe03	GMYN	0.376753	3.60343	0.104554	3.69e-28	522	122.068	399.932	NA	220	103.066	116.934	NA	NA	1.1313	1.20598:1.52652:1:1:1:1	0.44636(0.54023:0.362069:0.436782)	NA	NA	NA	NA
Arr	PAU&PAU	Spe10|Spe51	GMYN	0.19643	3.70852	0.0529672	3.21e-42	582	140.428	441.572	NA	187	111.493	75.5069	NA	NA	1.04384	0.739756:1.73831:1:1:1:1	0.53866(0.587629:0.438144:0.590206)	NA	NA	NA	NA
Arr	CHI&CHI	Spe34|Spe35	GMYN	0.0372369	1.66104	0.0224178	7.89e-117	1227	299.905	927.095	NA	234	200.37	33.6297	NA	NA	0.43413	1.84202:1.48711:1:1:1:1	0.44295(0.56357:0.361858:0.403423)	NA	NA	NA	NA
Arr	DIP&CHI	Spe11|Spe40	GMYN	0.574734	4.23338	0.135762	2.87e-39	1137	282.736	854.264	NA	572	234.55	337.45	NA	NA	1.48452	1.32677:1.72755:1:1:1:1	0.459543(0.509235:0.370712:0.498681)	NA	NA	NA	NA
Arr	CHI&CHI	Spe01|Spe04	GMYN	0.443657	3.92254	0.113104	4.78e-48	810	186.803	623.197	NA	375	169.378	205.622	NA	NA	1.24596	1.07675:1.90881:1:1:1:1	0.531481(0.581481:0.383333:0.62963)	NA	NA	NA	NA
Arr	CHI&CHI	Spe01|Spe36	GMYN	0.42767	4.2405	0.100854	2.49e-70	1188	285.43	902.57	NA	545	255.017	289.983	NA	NA	1.34374	1.32854:2.082:1:1:1:1	0.515572(0.588384:0.367424:0.590909)	NA	NA	NA	NA
Arr	CHI&DIP	Spe37|Spe49	GMYN	0.375522	3.51188	0.106929	3.11e-24	489	108.041	380.959	NA	200	89.005	110.995	NA	NA	1.06848	1.12996:1.39216:1:1:1:1	0.445808(0.555215:0.361963:0.420245)	NA	NA	NA	NA
Arr	DIP&DIP	Spe16|Spe49	GMYN	0.425297	4.17994	0.101747	4.48e-52	1197	263.288	933.712	NA	518	219.809	298.191	NA	NA	1.25116	1.18458:1.80654:1:1:1:1	0.432749(0.548872:0.367168:0.382206)	NA	NA	NA	NA
Arr	DIP&CHI	Spe15|Spe37	GMYN	1.03155	2.63989	0.390753	0.00768213	204	48.6554	155.345	NA	115	35.4112	79.5888	NA	NA	1.41515	2:2:1:1:1:1	0.433824(0.544118:0.338235:0.419118)	NA	NA	NA	NA
Arr	CHI&CHI	Spe04|Spe39	GMYN	0.381047	3.97271	0.0959163	1.91e-51	813	199.726	613.274	NA	357	176.027	180.973	NA	NA	1.26339	1.28349:1.68625:1:1:1:1	0.4631(0.54428:0.378229:0.46679)	NA	NA	NA	NA
Arr	CHI&PAU	Spe38|Spe51	GMYN	0.741504	3.44669	0.215135	4.13e-08	426	99.0464	326.954	NA	228	76.565	151.435	NA	NA	1.37047	1.42304:1.44626:1:1:1:1	0.438967(0.59507:0.352113:0.369718)	NA	NA	NA	NA
Arr	CHI&CHI	Spe34|Spe40	GMYN	0.526672	3.66442	0.143726	2.91e-26	1065	260.233	804.767	NA	493	193.701	299.299	NA	NA	1.29338	1.46626:2.09129:1:1:1:1	0.439437(0.512676:0.35493:0.450704)	NA	NA	NA	NA
Arr	SYM&CHI	Spe08|Spe33	GMYN	0.134638	4.24576	0.0317112	8.52e-153	1227	287.439	939.561	NA	385	269.994	115.006	NA	NA	1.09771	0.889813:1.87647:1:1:1:1	0.471068(0.574572:0.356968:0.481663)	NA	NA	NA	NA
Arr	DIP&PAU	Spe46|Spe51	GMYN	0.426784	4.23401	0.100799	8.79e-80	1248	282.971	965.029	NA	571	261.378	309.622	NA	NA	1.29003	1.01295:1.59818:1:1:1:1	0.529647(0.576923:0.36899:0.643029)	NA	NA	NA	NA
Arr	DIP&CHI	Spe12|Spe32	GMYN	1.10084	3.26566	0.337095	1e-05	348	77.8056	270.194	NA	215	64.0386	150.961	NA	NA	1.58485	1.26585:1.44443:1:1:1:1	0.429598(0.551724:0.362069:0.375)	NA	NA	NA	NA
Arr	CHI&DIP	Spe40|Spe42	GMYN	0.549476	4.13565	0.132863	6.33e-26	981	248.193	732.807	NA	471	189.962	281.038	NA	NA	1.45678	1.61938:1.92075:1:1:1:1	0.436799(0.510703:0.340979:0.458716)	NA	NA	NA	NA
Arr	SYM&DIP	Spe09|Spe49	GMYN	0.380283	4.12308	0.0922327	1.29e-64	1077	244.067	832.933	NA	461	216.234	244.766	NA	NA	1.22846	0.828718:1.69872:1:1:1:1	0.453575(0.538997:0.360724:0.461003)	NA	NA	NA	NA
Arr	CHI&CHI	Spe01|Spe03	GMYN	0.42929	4.23753	0.101307	4.97e-66	1185	284.304	900.696	NA	541	250.452	290.548	NA	NA	1.34296	1.16723:1.43015:1:1:1:1	0.494093(0.581013:0.356962:0.544304)	NA	NA	NA	NA
Arr	DIP&DIP	Spe11|Spe42	GMYN	0.377624	4.20351	0.0898355	2.35e-55	1125	271.694	853.306	NA	473	223.076	249.924	NA	NA	1.3016	1.27599:1.66539:1:1:1:1	0.456889(0.573333:0.341333:0.456)	NA	NA	NA	NA
Arr	CHI&CHI	Spe35|Spe39	GMYN	0.0568562	4.30979	0.0131924	1.86e-136	1224	313.057	910.943	NA	290	240.233	49.767	NA	NA	1.14461	2.46982:1.79677:1:1:1:1	0.441176(0.573529:0.362745:0.387255)	NA	NA	NA	NA
Arr	PAU&DIP	Spe10|Spe16	GMYN	0.0924538	3.68392	0.0250966	3.8e-74	510	135.897	374.103	NA	157	124.555	32.4448	NA	NA	1.04945	1.78012:1.41309:1:1:1:1	0.489216(0.597059:0.4:0.470588)	NA	NA	NA	NA
Arr	PAU&CHI	Spe10|Spe41	GMYN	0.0884421	3.62248	0.0244148	8.85e-61	510	125.207	384.793	NA	139	106.999	32.0006	NA	NA	0.95606	1.14461:1.54299:1:1:1:1	0.532353(0.605882:0.4:0.591176)	NA	NA	NA	NA
Arr	DIP&CHI	Spe12|Spe38	GMYN	0.655141	3.0688	0.213484	1.19e-09	261	59.8436	201.156	NA	137	51.0309	85.9691	NA	NA	1.20856	0.704571:1.0286:1:1:1:1	0.47318(0.637931:0.350575:0.431034)	NA	NA	NA	NA
Arr	PAU&DIP	Spe10|Spe48	GMYN	0.0855092	3.7086	0.023057	3e-66	504	140.442	363.558	NA	150	120.699	29.3014	NA	NA	1.0951	2.12848:1.47434:1:1:1:1	0.49504(0.60119:0.407738:0.47619)	NA	NA	NA	NA
Arr	CHI&DIP	Spe03|Spe42	GMYN	0.276974	4.15004	0.06674	2.43e-79	1131	252.999	878.001	NA	422	220.752	201.248	NA	NA	1.14336	1.22161:1.57886:1:1:1:1	0.428382(0.555703:0.334218:0.395225)	NA	NA	NA	NA
Arr	PAU&DIP	Spe10|Spe50	GMYN	0.227112	5.01633	0.0452745	6.6e-36	585	152.334	432.666	NA	197	114.108	82.8917	NA	NA	1.47423	1.59171:4.594:1:1:1:1	0.558974(0.620513:0.441026:0.615385)	NA	NA	NA	NA
Arr	DIP&DIP	Spe42|Spe48	GMYN	0.35994	4.10852	0.0876081	6.11e-67	1131	239.373	891.627	NA	463	211.594	251.406	NA	NA	1.15332	1.01853:1.72285:1:1:1:1	0.41733(0.561008:0.343501:0.34748)	NA	NA	NA	NA
Arr	DIP&DIP	Spe12|Spe49	GMYN	0.344023	3.32688	0.103407	9.72e-20	336	84.4229	251.577	NA	138	69.4092	68.5908	NA	NA	1.09349	1.43581:1.56407:1:1:1:1	0.458333(0.575893:0.3125:0.486607)	NA	NA	NA	NA
Arr	CHI&CHI	Spe34|Spe36	GMYN	0.0209783	4.17039	0.0050303	5.18e-160	1230	259.957	970.043	NA	229	208.96	20.0398	NA	NA	0.897943	0.61361:1.8625:1:1:1:1	0.456504(0.562195:0.360976:0.446341)	NA	NA	NA	NA
Arr	CHI&CHI	Spe32|Spe39	GMYN	0.0686869	2.4846	0.0276451	6.83e-62	660	159.477	500.523	NA	148	115.253	32.7475	NA	NA	0.652448	2.5628:2.03478:1:1:1:1	0.415909(0.547727:0.340909:0.359091)	NA	NA	NA	NA
Arr	CHI&PAU	Spe33|Spe51	GMYN	0.115776	4.27409	0.0270878	9.74e-150	1227	298.506	928.494	NA	369	269.869	99.1312	NA	NA	1.12741	1.48822:1.9216:1:1:1:1	0.447433(0.557457:0.364303:0.420538)	NA	NA	NA	NA
Arr	DIP&DIP	Spe16|Spe44	GMYN	0.422693	4.22658	0.100008	1.02e-72	1179	280.181	898.819	NA	540	253.718	286.282	NA	NA	1.32666	1.17969:1.62621:1:1:1:1	0.464377(0.56743:0.374046:0.451654)	NA	NA	NA	NA
Arr	SYM&CHI	Spe09|Spe33	GMYN	0.0915172	4.1586	0.0220067	6.91e-161	1080	255.902	824.098	NA	315	244.312	70.6882	NA	NA	1.0552	1.46622:1.98257:1:1:1:1	0.437963(0.551389:0.359722:0.402778)	NA	NA	NA	NA
Arr	CHI&DIP	Spe03|Spe46	GMYN	0.388907	4.18414	0.0929478	6.55e-90	1149	264.769	884.231	NA	517	252.041	264.959	NA	NA	1.26346	1.1098:1.14352:1:1:1:1	0.509574(0.573107:0.362924:0.592689)	NA	NA	NA	NA
Arr	CHI&SYM	Spe04|Spe09	GMYN	0.374935	4.00098	0.0937108	3.65e-45	813	207.398	605.602	NA	351	174.415	176.585	NA	NA	1.29994	1.37387:1.72361:1:1:1:1	0.47786(0.555351:0.380074:0.498155)	NA	NA	NA	NA
Arr	SYM&DIP	Spe08|Spe12	GMYN	0.107345	3.38448	0.0317168	1.53e-45	333	91.1625	241.838	NA	105	81.0472	23.9528	NA	NA	1.0045	2:2:1:1:1:1	0.503003(0.608108:0.351351:0.54955)	NA	NA	NA	NA
Arr	CHI&DIP	Spe33|Spe49	GMYN	0.429894	4.18687	0.102677	1.04e-53	1197	265.732	931.268	NA	523	223.215	299.785	NA	NA	1.26394	1.10172:1.57367:1:1:1:1	0.43985(0.536341:0.358396:0.424812)	NA	NA	NA	NA
Arr	DIP&DIP	Spe15|Spe16	GMYN	0.0527927	3.1572	0.0167214	1.96e-48	324	67.3295	256.67	NA	76	62.9682	13.0318	NA	NA	0.69791	1.30552:2.79451:1:1:1:1	0.408951(0.527778:0.375:0.324074)	NA	NA	NA	NA
Arr	DIP&DIP	Spe17|Spe49	GMYN	0.428401	4.21887	0.101544	1.89e-81	1179	277.318	901.682	NA	550	260.008	289.992	NA	NA	1.31997	1.22371:1.74016:1:1:1:1	0.474131(0.548346:0.367684:0.506361)	NA	NA	NA	NA
Arr	DIP&DIP	Spe15|Spe44	GMYN	0.513557	3.19064	0.160957	1.92e-14	321	70.3998	250.6	NA	152	60.5623	91.4377	NA	NA	1.10068	0.946412:1.73563:1:1:1:1	0.476636(0.490654:0.392523:0.546729)	NA	NA	NA	NA
Arr	CHI&CHI	Spe04|Spe41	GMYN	0.382115	3.97835	0.0960485	1.08e-37	813	201.233	611.767	NA	343	162.017	180.983	NA	NA	1.27225	1.40354:1.83248:1:1:1:1	0.510455(0.562731:0.380074:0.588561)	NA	NA	NA	NA
Arr	CHI&DIP	Spe32|Spe46	GMYN	0.553413	3.73198	0.148289	0	645	144.891	500.109	NA	342	149.83	192.17	NA	NA	1.26744	1.00081:1.41844:1:1:1:1	0.512403(0.562791:0.365116:0.609302)	NA	NA	NA	NA
Arr	CHI&CHI	Spe38|Spe40	GMYN	0.69162	3.23156	0.21402	3.62e-07	282	74.3473	207.653	NA	149	57.616	91.384	NA	NA	1.36126	1.26602:3.03422:1:1:1:1	0.41844(0.547872:0.324468:0.382979)	NA	NA	NA	NA
Arr	PAU&CHI	Spe10|Spe34	GMYN	0.076406	3.61303	0.0211474	1.29e-61	510	123.64	386.36	NA	131	103.027	27.9729	NA	NA	0.933792	1.02324:1.26467:1:1:1:1	0.506863(0.602941:0.394118:0.523529)	NA	NA	NA	NA
Arr	DIP&DIP	Spe11|Spe43	GMYN	0.0917927	4.31244	0.0212855	2.52e-162	1314	314.167	999.833	NA	364	277.951	86.049	NA	NA	1.10092	1.17685:1.5023:1:1:1:1	0.471461(0.577626:0.356164:0.480594)	NA	NA	NA	NA
Arr	CHI&PAU	Spe36|Spe51	GMYN	0.0991929	4.27411	0.0232078	1.1e-143	1227	298.513	928.487	NA	344	258.083	85.9174	NA	NA	1.1149	1.22696:1.65304:1:1:1:1	0.463733(0.557457:0.367971:0.46577)	NA	NA	NA	NA
Arr	CHI&DIP	Spe40|Spe49	GMYN	0.609512	4.15455	0.146709	9.34e-33	1068	254.525	813.475	NA	542	209.601	332.399	NA	NA	1.45436	1.1973:2.31327:1:1:1:1	0.442416(0.483146:0.358146:0.485955)	NA	NA	NA	NA
Arr	DIP&CHI	Spe17|Spe34	GMYN	0.0880102	4.25499	0.020684	0	1242	291	951	NA	372	293.345	78.6547	NA	NA	1.06433	1.1436:1.77573:1:1:1:1	0.468196(0.572464:0.363527:0.468599)	NA	NA	NA	NA
Arr	PAU&CHI	Spe10|Spe40	GMYN	0.481809	1.87578	0.256858	2.13e-11	510	127.857	382.143	NA	222	88.0295	133.971	NA	NA	0.831277	1.71533:2.1401:1:1:1:1	0.518627(0.564706:0.394118:0.597059)	NA	NA	NA	NA
Arr	CHI&CHI	Spe04|Spe36	GMYN	0.380464	3.99698	0.0951879	2e-43	816	206.296	609.704	NA	352	172.239	179.761	NA	NA	1.29477	1.48622:1.87149:1:1:1:1	0.482843(0.547794:0.378676:0.522059)	NA	NA	NA	NA
Arr	DIP&DIP	Spe46|Spe48	GMYN	0.436108	4.26276	0.102307	7.19e-87	1203	294.028	908.972	NA	574	277.447	296.553	NA	NA	1.37139	1.26415:1.63131:1:1:1:1	0.507066(0.582294:0.381546:0.557357)	NA	NA	NA	NA
Arr	CHI&DIP	Spe02|Spe50	GMYN	0.0889397	3.74652	0.0237393	4.71e-61	549	147.726	401.274	NA	152	118.474	33.5261	NA	NA	1.07313	2.06828:1.74076:1:1:1:1	0.480874(0.560109:0.368852:0.513661)	NA	NA	NA	NA
Arr	PAU&DIP	Spe10|Spe46	GMYN	0.335144	3.54156	0.0946317	1.44e-30	501	112.401	388.599	NA	201	96.9619	104.038	NA	NA	1.05452	1.38376:1.35291:1:1:1:1	0.553892(0.610778:0.389222:0.661677)	NA	NA	NA	NA
Arr	DIP&CHI	Spe16|Spe33	GMYN	0.122463	4.21416	0.0290598	3.5e-122	1227	275.58	951.42	NA	341	234.083	106.917	NA	NA	1.04144	2.08244:2.32968:1:1:1:1	0.416055(0.562347:0.360636:0.325183)	NA	NA	NA	NA
Arr	CHI&SYM	Spe01|Spe52	GMYN	0.494464	4.16445	0.118734	2.5e-33	1203	257.909	945.091	NA	536	199.075	336.925	NA	NA	1.28127	1.37073:1.89735:1:1:1:1	0.570657(0.614713:0.382793:0.714464)	NA	NA	NA	NA
Arr	DIP&CHI	Spe15|Spe31	GMYN	0.697955	3.23093	0.216023	5.36e-10	300	74.2852	225.715	NA	163	62.6862	100.314	NA	NA	1.32516	1.59444:2.47266:1:1:1:1	0.446667(0.555:0.385:0.4)	NA	NA	NA	NA
Arr	CHI&DIP	Spe01|Spe17	GMYN	0.406696	4.22553	0.0962473	1.43e-61	1182	279.789	902.211	NA	519	239.604	279.396	NA	NA	1.31064	1.38915:1.99338:1:1:1:1	0.524112(0.596447:0.362944:0.612944)	NA	NA	NA	NA
Arr	CHI&CHI	Spe03|Spe34	GMYN	0.331917	4.17121	0.0795733	1.09e-81	1221	260.243	960.757	NA	489	234.353	254.647	NA	NA	1.15022	1.04981:1.32405:1:1:1:1	0.43448(0.555283:0.351351:0.396806)	NA	NA	NA	NA
Arr	DIP&DIP	Spe12|Spe46	GMYN	0.39397	3.2909	0.119715	3.3e-28	345	80.4687	264.531	NA	156	76.0547	79.9453	NA	NA	1.06966	1.10022:1.19642:1:1:1:1	0.5(0.595652:0.33913:0.565217)	NA	NA	NA	NA
Arr	CHI&CHI	Spe32|Spe36	GMYN	0.0504574	1.99658	0.0252719	9.11e-64	663	162.913	500.087	NA	138	113.656	24.3439	NA	NA	0.528661	2.42815:2.19287:1:1:1:1	0.414027(0.533937:0.339367:0.368778)	NA	NA	NA	NA
Arr	CHI&DIP	Spe02|Spe42	GMYN	0.454476	3.69944	0.12285	2.17e-18	543	138.738	404.262	NA	240	105.232	134.768	NA	NA	1.28358	1.77564:2.99206:1:1:1:1	0.437385(0.538674:0.339779:0.433702)	NA	NA	NA	NA
Arr	DIP&SYM	Spe12|Spe52	GMYN	0.441262	3.30451	0.133533	8.21e-15	321	81.942	239.058	NA	144	66.1435	77.8565	NA	NA	1.17217	0.784206:2.56784:1:1:1:1	0.493769(0.598131:0.345794:0.537383)	NA	NA	NA	NA
Arr	DIP&CHI	Spe17|Spe35	GMYN	0.0876321	4.28399	0.0204557	2.74e-148	1227	302.471	924.529	NA	337	260.787	76.2129	NA	NA	1.12209	1.55908:1.50976:1:1:1:1	0.462103(0.575795:0.359413:0.4511)	NA	NA	NA	NA
Arr	CHI&PAU	Spe40|Spe51	GMYN	0.642674	1.91403	0.33577	1.19e-16	1242	317.481	924.519	NA	612	219.557	392.443	NA	NA	0.96766	1.49461:1.94287:1:1:1:1	0.463366(0.506039:0.388889:0.495169)	NA	NA	NA	NA
Arr	DIP&CHI	Spe15|Spe39	GMYN	0.0552111	3.23801	0.017051	5.67e-44	324	74.989	249.011	NA	78	64.7823	13.2177	NA	NA	0.791862	1.31371:1.28994:1:1:1:1	0.436728(0.513889:0.37963:0.416667)	NA	NA	NA	NA
Arr	SYM&DIP	Spe09|Spe44	GMYN	0.391489	4.16249	0.0940516	7.36e-67	1107	257.234	849.766	NA	484	228.586	255.414	NA	NA	1.26776	0.876394:1.47732:1:1:1:1	0.481481(0.552846:0.376694:0.514905)	NA	NA	NA	NA
Arr	CHI&DIP	Spe37|Spe48	GMYN	0.115098	3.51943	0.0327036	6.79e-63	495	109.134	385.866	NA	142	101.088	40.9124	NA	NA	0.865664	1.1961:2.72164:1:1:1:1	0.433333(0.578788:0.390909:0.330303)	NA	NA	NA	NA
Arr	DIP&DIP	Spe11|Spe50	GMYN	0.0949007	4.30401	0.0220493	3.39e-148	1323	310.656	1012.34	NA	354	264.152	89.8479	NA	NA	1.08325	1.07299:1.71403:1:1:1:1	0.493953(0.573696:0.361678:0.546485)	NA	NA	NA	NA
Arr	CHI&SYM	Spe39|Spe52	GMYN	0.669006	4.26118	0.157	2.16e-43	1176	293.411	882.589	NA	640	256.632	383.368	NA	NA	1.56525	1.21245:2.07469:1:1:1:1	0.508503(0.589286:0.383929:0.552296)	NA	NA	NA	NA
Arr	CHI&SYM	Spe01|Spe09	GMYN	0.37697	4.18954	0.0899787	1.64e-73	1074	266.682	807.318	NA	477	240.814	236.186	NA	NA	1.32366	1.21813:1.7838:1:1:1:1	0.511173(0.600559:0.357542:0.575419)	NA	NA	NA	NA
Arr	CHI&DIP	Spe41|Spe46	GMYN	0.428596	4.18592	0.10239	3.71e-62	1284	265.397	1018.6	NA	559	231.385	327.615	NA	NA	1.20522	0.915592:1.7569:1:1:1:1	0.546729(0.580607:0.370327:0.689252)	NA	NA	NA	NA
Arr	CHI&DIP	Spe01|Spe43	GMYN	0.410581	4.2645	0.0962789	3.49e-71	1209	294.711	914.289	NA	546	260.886	285.114	NA	NA	1.35003	1.32369:1.929:1:1:1:1	0.512821(0.595533:0.356079:0.586849)	NA	NA	NA	NA
Arr	CHI&DIP	Spe39|Spe43	GMYN	0.0814905	4.25712	0.0191422	1.69e-156	1224	291.826	932.174	NA	329	257.244	71.7558	NA	NA	1.07704	1.33125:1.43253:1:1:1:1	0.455882(0.583333:0.362745:0.421569)	NA	NA	NA	NA
Arr	DIP&SYM	Spe50|Spe52	GMYN	0.660777	4.19572	0.157489	2.93e-42	1206	268.886	937.114	NA	639	235.713	403.287	NA	NA	1.44892	0.917483:2.02663:1:1:1:1	0.54063(0.589552:0.386816:0.645522)	NA	NA	NA	NA
Arr	DIP&PAU	Spe44|Spe51	GMYN	0.439764	4.27345	0.102906	2.53e-59	1239	298.249	940.751	NA	562	253.5	308.5	NA	NA	1.3626	1.01313:1.43726:1:1:1:1	0.493543(0.552058:0.378935:0.549637)	NA	NA	NA	NA
Arr	DIP&SYM	Spe17|Spe52	GMYN	0.659141	4.19086	0.15728	1.9e-46	1164	267.151	896.849	NA	625	239.828	385.172	NA	NA	1.46971	0.953905:2.10303:1:1:1:1	0.533505(0.596649:0.389175:0.614691)	NA	NA	NA	NA
Arr	CHI&DIP	Spe03|Spe44	GMYN	0.432096	4.2637	0.101343	1.65e-56	1215	294.399	920.601	NA	545	246.749	298.251	NA	NA	1.36051	1.202:1.61171:1:1:1:1	0.472016(0.554321:0.367901:0.493827)	NA	NA	NA	NA
Arr	SYM&DIP	Spe09|Spe15	GMYN	0.0932139	3.24031	0.028767	8.6e-47	324	75.2198	248.78	NA	92	70.3269	21.6731	NA	NA	0.823844	0.904826:2.63476:1:1:1:1	0.436728(0.518519:0.375:0.416667)	NA	NA	NA	NA
Arr	CHI&DIP	Spe33|Spe42	GMYN	0.401206	4.1417	0.0968699	3.08e-75	1137	250.202	886.798	NA	503	231.594	271.406	NA	NA	1.22432	1.10163:1.81698:1:1:1:1	0.42788(0.562005:0.336412:0.385224)	NA	NA	NA	NA
Arr	DIP&DIP	Spe48|Spe49	GMYN	0.432872	4.18161	0.103518	7.99e-54	1197	263.875	933.125	NA	525	223.124	301.876	NA	NA	1.25927	1.12751:1.72454:1:1:1:1	0.434419(0.547619:0.367168:0.388471)	NA	NA	NA	NA
Arr	DIP&CHI	Spe12|Spe39	GMYN	0.0641079	2.78672	0.0230048	1.69e-36	333	99.3852	233.615	NA	87	72.7246	14.2754	NA	NA	0.876683	3.2741:6.59622:1:1:1:1	0.463964(0.608108:0.333333:0.45045)	NA	NA	NA	NA
Arr	DIP&CHI	Spe11|Spe34	GMYN	0.0896062	4.18836	0.0213941	1.65e-159	1242	266.262	975.738	NA	328	245.955	82.0454	NA	NA	0.968303	0.64677:1.24334:1:1:1:1	0.464171(0.570048:0.359903:0.46256)	NA	NA	NA	NA
Arr	CHI&DIP	Spe32|Spe43	GMYN	0.0902111	3.73539	0.0241504	3.71e-66	663	145.549	517.451	NA	161	117.179	43.8211	NA	NA	0.890441	1.53745:1.34817:1:1:1:1	0.413273(0.545249:0.330317:0.364253)	NA	NA	NA	NA
Arr	CHI&SYM	Spe01|Spe08	GMYN	0.399621	4.19576	0.095244	2.26e-61	1170	268.902	901.098	NA	507	231.525	275.475	NA	NA	1.27209	1.27569:1.742:1:1:1:1	0.540171(0.60641:0.362821:0.651282)	NA	NA	NA	NA
Arr	CHI&DIP	Spe39|Spe50	GMYN	0.0763651	4.32674	0.0176496	1.98e-149	1224	320.213	903.787	NA	333	267.613	65.3869	NA	NA	1.18831	1.84206:1.84276:1:1:1:1	0.47835(0.583333:0.363971:0.487745)	NA	NA	NA	NA
Arr	DIP&CHI	Spe15|Spe32	GMYN	0.061064	3.12096	0.0195658	1.13e-45	324	64.1532	259.847	NA	75	59.8139	15.1861	NA	NA	0.666934	0.909413:1.45074:1:1:1:1	0.408951(0.5:0.37963:0.347222)	NA	NA	NA	NA
Arr	SYM&PAU	Spe08|Spe10	GMYN	0.132566	3.61481	0.036673	1.86e-56	510	123.934	386.066	NA	155	108.359	46.6413	NA	NA	0.97878	1.16494:1.588:1:1:1:1	0.540196(0.620588:0.4:0.6)	NA	NA	NA	NA
Arr	CHI&DIP	Spe38|Spe43	GMYN	0.648854	3.48246	0.186321	5.64e-11	420	103.884	316.116	NA	217	82.0016	134.998	NA	NA	1.34972	1.43776:1.77596:1:1:1:1	0.454762(0.607143:0.346429:0.410714)	NA	NA	NA	NA
Arr	CHI&DIP	Spe02|Spe49	GMYN	0.569515	3.59987	0.158205	1.15e-17	525	121.489	403.511	NA	257	99.4217	157.578	NA	NA	1.27076	0.952217:1.68309:1:1:1:1	0.470476(0.537143:0.382857:0.491429)	NA	NA	NA	NA
Arr	DIP&CHI	Spe11|Spe36	GMYN	0.0925737	4.23885	0.0218394	1.13e-141	1230	284.803	945.197	NA	327	245.012	81.9885	NA	NA	1.05263	1.00532:1.38656:1:1:1:1	0.470732(0.570732:0.356098:0.485366)	NA	NA	NA	NA
Arr	CHI&CHI	Spe04|Spe32	GMYN	0.370984	3.57481	0.103777	4.21e-35	471	117.498	353.502	NA	210	107.822	102.178	NA	NA	1.17022	1.80367:1.68811:1:1:1:1	0.428875(0.509554:0.33758:0.43949)	NA	NA	NA	NA
Arr	DIP&DIP	Spe43|Spe44	GMYN	0.470508	4.27803	0.109982	1.39e-59	1242	300.079	941.921	NA	584	259.421	324.579	NA	NA	1.39044	1.23274:1.17791:1:1:1:1	0.487923(0.566425:0.365942:0.531401)	NA	NA	NA	NA
Arr	CHI&DIP	Spe38|Spe44	GMYN	0.721034	1.81977	0.396222	8.45e-05	387	103.652	283.348	NA	200	70.8704	129.13	NA	NA	1.01532	1.41697:1.60149:1:1:1:1	0.50646(0.604651:0.414729:0.5)	NA	NA	NA	NA
Arr	CHI&DIP	Spe40|Spe50	GMYN	0.57325	4.20177	0.13643	8.13e-34	1131	271.066	859.934	NA	558	218.826	339.174	NA	NA	1.4429	1.20808:1.76871:1:1:1:1	0.478338(0.52122:0.371353:0.54244)	NA	NA	NA	NA
Arr	CHI&SYM	Spe33|Spe52	GMYN	0.691231	4.23746	0.163124	1.49e-48	1188	284.278	903.722	NA	657	257.588	399.412	NA	NA	1.53981	0.991844:2.07881:1:1:1:1	0.5(0.580808:0.380051:0.539141)	NA	NA	NA	NA
Arr	SYM&DIP	Spe09|Spe17	GMYN	0.0941567	4.17656	0.0225441	4.19e-117	1080	262.106	817.894	NA	290	217.903	72.0973	NA	NA	1.08492	1.25159:1.69573:1:1:1:1	0.469444(0.563889:0.3625:0.481944)	NA	NA	NA	NA
Arr	PAU&CHI	Spe10|Spe32	GMYN	0.993536	3.53039	0.281424	1.3e-07	471	110.74	360.26	NA	282	89.14	192.86	NA	NA	1.58999	0.985427:1.45768:1:1:1:1	0.467091(0.573248:0.382166:0.44586)	NA	NA	NA	NA
Arr	DIP&PAU	Spe50|Spe51	GMYN	0.169836	4.34363	0.0391	5.76e-143	1380	327.505	1052.49	NA	454	295.196	158.804	NA	NA	1.16037	1.03571:1.61383:1:1:1:1	0.494203(0.566304:0.38913:0.527174)	NA	NA	NA	NA
Arr	CHI&DIP	Spe34|Spe50	GMYN	0.0859089	4.29025	0.0200243	9.25e-156	1242	305.005	936.995	NA	342	266.242	75.758	NA	NA	1.11839	1.41412:1.81097:1:1:1:1	0.480274(0.573671:0.364734:0.502415)	NA	NA	NA	NA
Arr	DIP&DIP	Spe44|Spe48	GMYN	0.418712	4.22895	0.0990109	4.6e-79	1179	281.07	897.93	NA	544	259.978	284.022	NA	NA	1.32706	1.15957:1.56769:1:1:1:1	0.466073(0.566158:0.37659:0.455471)	NA	NA	NA	NA
Arr	DIP&DIP	Spe43|Spe50	GMYN	0.0608885	4.34567	0.0140113	4.37e-157	1314	328.397	985.603	NA	324	266.481	57.5187	NA	NA	1.13175	1.54957:1.23412:1:1:1:1	0.486682(0.579909:0.364155:0.515982)	NA	NA	NA	NA
Arr	CHI&SYM	Spe04|Spe52	GMYN	0.659697	3.94262	0.167324	4.85e-28	810	191.873	618.127	NA	432	165.876	266.124	NA	NA	1.43736	1.00047:2.10156:1:1:1:1	0.545679(0.592593:0.396296:0.648148)	NA	NA	NA	NA
Arr	CHI&CHI	Spe35|Spe38	GMYN	0.737468	3.41943	0.21567	7.32e-10	426	95.511	330.489	NA	229	77.0453	151.955	NA	NA	1.33878	1.19498:1.79138:1:1:1:1	0.428404(0.591549:0.330986:0.362676)	NA	NA	NA	NA
Arr	CHI&DIP	Spe36|Spe48	GMYN	0.115293	4.24094	0.0271858	2.45e-121	1230	285.598	944.402	NA	338	237.544	100.456	NA	NA	1.07324	1.48419:1.80716:1:1:1:1	0.439024(0.564634:0.368293:0.384146)	NA	NA	NA	NA
Arr	CHI&CHI	Spe02|Spe41	GMYN	0.0583778	3.6969	0.015791	5.29e-69	549	138.268	410.732	NA	137	113.979	23.0208	NA	NA	0.974755	1.55701:1.1175:1:1:1:1	0.505464(0.576503:0.374317:0.565574)	NA	NA	NA	NA
Arr	CHI&DIP	Spe40|Spe43	GMYN	0.578367	2.57902	0.224258	4.7e-22	1128	282.313	845.687	NA	540	204.937	335.063	NA	NA	1.07909	1.47063:2.0807:1:1:1:1	0.449025(0.513298:0.365691:0.468085)	NA	NA	NA	NA
Arr	CHI&CHI	Spe31|Spe37	GMYN	0.729211	3.61568	0.20168	5.53e-15	495	124.078	370.922	NA	274	104.979	169.021	NA	NA	1.45274	1.21342:2.28513:1:1:1:1	0.460606(0.533333:0.40303:0.445455)	NA	NA	NA	NA
Arr	CHI&CHI	Spe36|Spe37	GMYN	0.0455467	3.60221	0.0126441	1.18e-69	495	121.869	373.131	NA	120	103.541	16.4594	NA	NA	0.921195	1.62298:1.79957:1:1:1:1	0.462626(0.566667:0.369697:0.451515)	NA	NA	NA	NA
Arr	CHI&SYM	Spe38|Spe52	GMYN	0.638686	3.36621	0.189735	1.45e-25	402	88.9677	313.032	NA	219	87.0022	131.998	NA	NA	1.24232	0.691853:1.42361:1:1:1:1	0.507463(0.597015:0.380597:0.544776)	NA	NA	NA	NA
Arr	CHI&DIP	Spe01|Spe16	GMYN	0.429474	4.26116	0.100788	3.82e-72	1182	293.404	888.596	NA	550	263.668	286.332	NA	NA	1.3806	1.31418:1.87948:1:1:1:1	0.484772(0.59264:0.365482:0.496193)	NA	NA	NA	NA
Arr	SYM&CHI	Spe08|Spe36	GMYN	0.122114	4.2695	0.0286015	3.85e-131	1227	296.684	930.316	NA	360	255.771	104.229	NA	NA	1.12494	1.09584:1.99844:1:1:1:1	0.491035(0.57824:0.359413:0.535452)	NA	NA	NA	NA
Arr	CHI&CHI	Spe03|Spe39	GMYN	0.316768	4.1721	0.0759253	2.94e-80	1215	260.552	954.448	NA	476	231.892	244.108	NA	NA	1.14353	1.15001:1.14988:1:1:1:1	0.434568(0.564198:0.354321:0.385185)	NA	NA	NA	NA
Arr	CHI&DIP	Spe36|Spe43	GMYN	0.0887621	4.2436	0.0209167	3.99e-156	1236	286.613	949.387	NA	336	256.82	79.1801	NA	NA	1.05222	1.09101:1.35118:1:1:1:1	0.465615(0.575243:0.359223:0.462379)	NA	NA	NA	NA
Arr	CHI&DIP	Spe03|Spe50	GMYN	0.354493	4.25404	0.0833309	2.37e-90	1257	290.63	966.37	NA	536	266.082	269.918	NA	NA	1.2561	1.20119:1.10918:1:1:1:1	0.465394(0.562053:0.353222:0.480907)	NA	NA	NA	NA
Arr	CHI&CHI	Spe37|Spe38	GMYN	0.866848	3.21241	0.269843	3.75e-10	375	72.4731	302.527	NA	214	63.6361	150.364	NA	NA	1.32016	0.595808:0.686068:1:1:1:1	0.446667(0.6:0.38:0.36)	NA	NA	NA	NA
Arr	CHI&DIP	Spe04|Spe46	GMYN	0.424508	3.88719	0.109207	1.65e-45	804	178.203	625.797	NA	360	159.636	200.364	NA	NA	1.192	1.47126:1.84798:1:1:1:1	0.560323(0.576493:0.401119:0.703358)	NA	NA	NA	NA
Arr	CHI&SYM	Spe36|Spe52	GMYN	0.688528	4.19655	0.16407	1.36e-51	1185	269.186	915.814	NA	652	248.568	403.432	NA	NA	1.48541	0.887317:2.12771:1:1:1:1	0.517722(0.581013:0.382278:0.589873)	NA	NA	NA	NA
Arr	CHI&DIP	Spe33|Spe43	GMYN	0.0894932	4.27205	0.0209485	1.74e-142	1227	297.696	929.304	NA	332	253.875	78.125	NA	NA	1.10427	1.67602:1.4663:1:1:1:1	0.44621(0.57335:0.356968:0.408313)	NA	NA	NA	NA
Arr	PAU&CHI	Spe10|Spe33	GMYN	0.080446	3.71863	0.0216332	1.79e-53	510	142.333	367.667	NA	135	107.092	27.9082	NA	NA	1.09581	2.10242:2.25115:1:1:1:1	0.497059(0.608824:0.4:0.482353)	NA	NA	NA	NA
Arr	CHI&SYM	Spe03|Spe09	GMYN	0.303304	4.15137	0.0730612	1.32e-92	1110	253.449	856.551	NA	448	236.381	211.619	NA	NA	1.18194	1.24458:1.13694:1:1:1:1	0.436937(0.548649:0.354054:0.408108)	NA	NA	NA	NA
Arr	CHI&DIP	Spe32|Spe42	GMYN	0.469835	3.73687	0.12573	3.82e-28	657	145.837	511.163	NA	297	122.553	174.447	NA	NA	1.19503	1.51182:2.68775:1:1:1:1	0.396499(0.525114:0.315068:0.349315)	NA	NA	NA	NA
Arr	SYM&DIP	Spe08|Spe44	GMYN	0.412667	4.20413	0.0981574	3.27e-47	1179	271.921	907.079	NA	501	217.25	283.75	NA	NA	1.28712	1.07525:1.49147:1:1:1:1	0.518236(0.57888:0.371501:0.604326)	NA	NA	NA	NA
Arr	CHI&CHI	Spe03|Spe41	GMYN	0.34854	4.27932	0.0814475	1.11e-84	1257	300.593	956.407	NA	532	268.213	263.787	NA	NA	1.28853	1.34868:1.2855:1:1:1:1	0.466189(0.559666:0.354415:0.484487)	NA	NA	NA	NA
Arr	CHI&CHI	Spe03|Spe32	GMYN	0.390934	3.6555	0.106944	3.79e-39	660	130.843	529.157	NA	277	118.246	158.754	NA	NA	1.03812	0.983282:1.38869:1:1:1:1	0.412121(0.547727:0.338636:0.35)	NA	NA	NA	NA
Arr	CHI&DIP	Spe31|Spe46	GMYN	0.794913	4.09986	0.193888	9.57e-20	1035	236.626	798.374	NA	573	190.132	382.868	NA	NA	1.5505	1.27197:2.07959:1:1:1:1	0.535266(0.556522:0.394203:0.655072)	NA	NA	NA	NA
Arr	DIP&DIP	Spe11|Spe44	GMYN	0.432508	4.24737	0.10183	8.36e-60	1245	288.057	956.943	NA	555	245.203	309.797	NA	NA	1.31516	0.996354:1.3106:1:1:1:1	0.495582(0.562651:0.371084:0.553012)	NA	NA	NA	NA
Arr	CHI&DIP	Spe32|Spe50	GMYN	0.0892342	3.75129	0.0237876	2.96e-99	663	148.668	514.332	NA	187	143.909	43.091	NA	NA	0.910397	1.15063:1.46037:1:1:1:1	0.440422(0.549774:0.337104:0.434389)	NA	NA	NA	NA
Arr	DIP&CHI	Spe12|Spe40	GMYN	0.462044	1.85637	0.248896	8.08e-09	348	91.1028	256.897	NA	150	62.5775	87.4225	NA	NA	0.827065	2.14239:1.90393:1:1:1:1	0.471264(0.538793:0.353448:0.521552)	NA	NA	NA	NA
Arr	CHI&CHI	Spe03|Spe36	GMYN	0.335143	4.22535	0.0793173	6.31e-87	1218	279.722	938.278	NA	504	253.266	250.734	NA	NA	1.22856	1.27266:1.55836:1:1:1:1	0.444171(0.557882:0.352217:0.422414)	NA	NA	NA	NA
Arr	CHI&CHI	Spe34|Spe38	GMYN	0.684353	3.46619	0.197437	1.67e-08	429	101.655	327.345	NA	221	76.8287	144.171	NA	NA	1.34353	1.59303:2.23009:1:1:1:1	0.432401(0.58042:0.339161:0.377622)	NA	NA	NA	NA
Arr	PAU&DIP	Spe10|Spe11	GMYN	0.109846	3.67132	0.0299201	5.78e-69	519	133.632	385.368	NA	161	121.826	39.1739	NA	NA	1.02685	1.29751:1.66953:1:1:1:1	0.524085(0.609827:0.401734:0.560694)	NA	NA	NA	NA
Arr	CHI&DIP	Spe01|Spe12	GMYN	0.272069	3.25907	0.0834805	1.53e-20	309	77.1254	231.875	NA	115	62.7336	52.2664	NA	NA	1.01762	1.69643:2.31891:1:1:1:1	0.509709(0.61165:0.296117:0.621359)	NA	NA	NA	NA
Arr	CHI&SYM	Spe37|Spe52	GMYN	0.741129	3.62961	0.20419	1.46e-10	495	126.403	368.597	NA	267	98.2411	168.759	NA	NA	1.47873	1.0532:2.5593:1:1:1:1	0.5(0.578788:0.378788:0.542424)	NA	NA	NA	NA
Arr	CHI&DIP	Spe01|Spe48	GMYN	0.43815	4.25959	0.102862	1.42e-69	1182	292.789	889.211	NA	552	261.222	290.778	NA	NA	1.38474	1.24346:1.81273:1:1:1:1	0.487733(0.590102:0.36802:0.505076)	NA	NA	NA	NA
Arr	CHI&CHI	Spe33|Spe36	GMYN	0.044241	1.86799	0.0236837	4.02e-119	1227	310.695	916.305	NA	253	213.714	39.2858	NA	NA	0.506043	2.07584:2.33852:1:1:1:1	0.444988(0.559902:0.356968:0.418093)	NA	NA	NA	NA
Arr	DIP&DIP	Spe45|Spe49	GMYN	0.42909	4.21638	0.101767	2.61e-63	1206	276.398	929.602	NA	541	241.82	299.18	NA	NA	1.29708	0.979334:1.50237:1:1:1:1	0.475539(0.547264:0.354478:0.524876)	NA	NA	NA	NA
Arr	CHI&CHI	Spe02|Spe32	GMYN	0.101908	3.75472	0.0271413	8.76e-53	549	149.351	399.649	NA	151	113.095	37.9051	NA	NA	1.09562	3.24341:1.91327:1:1:1:1	0.429872(0.546448:0.363388:0.379781)	NA	NA	NA	NA
Arr	DIP&DIP	Spe15|Spe45	GMYN	0.0808645	3.31027	0.0244284	4.25e-33	324	82.5738	241.426	NA	81	62.5866	18.4134	NA	NA	0.903902	1.26748:2.92713:1:1:1:1	0.46142(0.513889:0.37037:0.5)	NA	NA	NA	NA
Arr	DIP&DIP	Spe42|Spe50	GMYN	0.358296	4.19876	0.0853337	3.43e-56	1119	269.979	849.021	NA	460	220.869	239.131	NA	NA	1.28488	1.28534:1.43876:1:1:1:1	0.474531(0.577748:0.343164:0.502681)	NA	NA	NA	NA
Arr	CHI&DIP	Spe39|Spe44	GMYN	0.428842	4.2411	0.101116	5.64e-71	1179	285.661	893.339	NA	544	256.192	287.808	NA	NA	1.35252	1.20256:1.44556:1:1:1:1	0.483036(0.569975:0.374046:0.505089)	NA	NA	NA	NA
Arr	PAU&DIP	Spe10|Spe49	GMYN	0.325775	3.55298	0.0916907	4.5e-40	504	114.126	389.874	NA	207	105.124	101.876	NA	NA	1.05655	0.760521:1.19863:1:1:1:1	0.498016(0.583333:0.372024:0.53869)	NA	NA	NA	NA
Arr	CHI&DIP	Spe31|Spe48	GMYN	0.758689	4.14294	0.183128	9.71e-27	1032	250.614	781.386	NA	574	209.588	364.412	NA	NA	1.58053	1.28696:2.1827:1:1:1:1	0.438953(0.534884:0.380814:0.401163)	NA	NA	NA	NA
Arr	CHI&DIP	Spe35|Spe43	GMYN	0.0943524	4.26504	0.0221223	1.56e-143	1227	294.927	932.073	NA	337	254.658	82.342	NA	NA	1.09684	1.45318:1.54133:1:1:1:1	0.451915(0.57824:0.359413:0.418093)	NA	NA	NA	NA
Arr	SYM&CHI	Spe08|Spe41	GMYN	0.11819	4.20264	0.0281228	3.27e-137	1227	271.382	955.618	NA	346	242.134	103.866	NA	NA	1.02157	0.772949:1.54853:1:1:1:1	0.5163(0.584352:0.363081:0.601467)	NA	NA	NA	NA
Arr	CHI&CHI	Spe31|Spe35	GMYN	0.716399	4.16197	0.17213	2.75e-31	1020	257.055	762.945	NA	563	218.467	344.533	NA	NA	1.58473	1.53732:2.3686:1:1:1:1	0.448529(0.530882:0.376471:0.438235)	NA	NA	NA	NA
Arr	DIP&CHI	Spe16|Spe39	GMYN	0.0946652	4.19163	0.0225843	6.36e-160	1224	267.426	956.574	NA	333	248.331	84.6693	NA	NA	0.989794	1.35288:2.18584:1:1:1:1	0.428513(0.57598:0.368873:0.340686)	NA	NA	NA	NA
Arr	CHI&CHI	Spe04|Spe31	GMYN	0.754277	3.97526	0.189743	1.4e-15	804	200.407	603.593	NA	437	156.13	280.87	NA	NA	1.55715	0.939353:1.88373:1:1:1:1	0.485075(0.533582:0.399254:0.522388)	NA	NA	NA	NA
Arr	CHI&PAU	Spe02|Spe51	GMYN	0.115013	3.67261	0.0313163	2.13e-60	549	133.863	415.137	NA	159	114.92	44.0797	NA	NA	0.982466	1.24063:1.13992:1:1:1:1	0.457195(0.560109:0.371585:0.439891)	NA	NA	NA	NA
Arr	CHI&DIP	Spe38|Spe42	GMYN	0.47396	3.47178	0.136518	1.34e-13	426	102.416	323.584	NA	189	77.224	111.776	NA	NA	1.19467	1.85287:2.3784:1:1:1:1	0.423709(0.588028:0.320423:0.362676)	NA	NA	NA	NA
Arr	CHI&CHI	Spe04|Spe33	GMYN	0.392204	3.976	0.0986429	8.48e-37	813	200.605	612.395	NA	346	161.492	184.508	NA	NA	1.27649	1.37414:1.97763:1:1:1:1	0.460025(0.5369:0.372694:0.47048)	NA	NA	NA	NA
Arr	PAU&DIP	Spe10|Spe43	GMYN	0.110852	3.63178	0.0305227	1.14e-56	510	126.769	383.231	NA	147	107.725	39.2753	NA	NA	0.986037	1.02959:1.71716:1:1:1:1	0.52451(0.614706:0.405882:0.552941)	NA	NA	NA	NA
Arr	CHI&CHI	Spe01|Spe40	GMYN	0.627166	4.15635	0.150893	1.47e-35	1071	255.137	815.863	NA	557	216.138	340.862	NA	NA	1.4679	1.29909:2.01697:1:1:1:1	0.501867(0.544818:0.357143:0.603641)	NA	NA	NA	NA
Arr	SYM&CHI	Spe09|Spe34	GMYN	0.0875897	4.15314	0.02109	5.54e-171	1080	254.046	825.954	NA	315	247.015	67.9855	NA	NA	1.04392	1.17135:2.01722:1:1:1:1	0.449537(0.558333:0.359722:0.430556)	NA	NA	NA	NA
Arr	CHI&SYM	Spe03|Spe52	GMYN	0.6764	4.2705	0.158389	1.56e-33	1218	297.081	920.919	NA	648	245.051	402.949	NA	NA	1.55303	1.05175:1.77458:1:1:1:1	0.498358(0.57266:0.373153:0.549261)	NA	NA	NA	NA
Arr	CHI&DIP	Spe01|Spe11	GMYN	0.409441	4.23681	0.0966389	2.21e-66	1206	284.03	921.97	NA	534	247.324	286.676	NA	NA	1.31084	1.07378:1.81095:1:1:1:1	0.524046(0.598259:0.360697:0.613184)	NA	NA	NA	NA
Arr	SYM&CHI	Spe09|Spe39	GMYN	0.0860147	4.16164	0.0206685	3.72e-162	1080	256.942	823.058	NA	311	244.421	66.5786	NA	NA	1.05564	1.29568:2.31075:1:1:1:1	0.443981(0.558333:0.359722:0.413889)	NA	NA	NA	NA
Arr	CHI&DIP	Spe37|Spe50	GMYN	0.0639796	3.66258	0.0174685	1.14e-56	495	132.084	362.916	NA	125	102.832	22.1677	NA	NA	1.02421	1.47748:3.34116:1:1:1:1	0.492929(0.584848:0.375758:0.518182)	NA	NA	NA	NA
Arr	CHI&DIP	Spe04|Spe43	GMYN	0.389208	3.98226	0.0977353	1.85e-52	813	202.286	610.714	NA	364	180.726	183.274	NA	NA	1.28321	1.26954:1.6053:1:1:1:1	0.472325(0.559041:0.376384:0.48155)	NA	NA	NA	NA
Arr	DIP&PAU	Spe15|Spe51	GMYN	0.0963565	3.17161	0.030381	0	324	68.6356	255.364	NA	92	69.0707	22.9293	NA	NA	0.747812	0.254705:1.36613:1:1:1:1	0.436728(0.513889:0.375:0.421296)	NA	NA	NA	NA
Arr	CHI&PAU	Spe32|Spe51	GMYN	0.125389	3.78171	0.0331567	2.02e-66	663	154.822	508.178	NA	189	130.604	58.3961	NA	NA	0.9792	1.93777:1.76335:1:1:1:1	0.409502(0.536199:0.334842:0.357466)	NA	NA	NA	NA
Arr	CHI&DIP	Spe39|Spe46	GMYN	0.441491	4.20368	0.105025	2.13e-104	1203	271.755	931.245	NA	577	270.89	306.11	NA	NA	1.29136	0.957878:1.42295:1:1:1:1	0.52286(0.587282:0.372818:0.608479)	NA	NA	NA	NA
Arr	DIP&CHI	Spe11|Spe33	GMYN	0.101407	4.20832	0.0240968	9.13e-158	1227	273.442	953.558	NA	344	253.94	90.0601	NA	NA	1.01665	0.993816:1.19675:1:1:1:1	0.452323(0.569682:0.353301:0.433985)	NA	NA	NA	NA
Arr	DIP&DIP	Spe17|Spe45	GMYN	0.077023	4.26427	0.0180624	5.68e-179	1251	294.623	956.377	NA	342	272.225	69.7748	NA	NA	1.06316	1.1396:1.49468:1:1:1:1	0.495604(0.576739:0.36211:0.547962)	NA	NA	NA	NA
Arr	DIP&DIP	Spe16|Spe45	GMYN	0.114652	4.24609	0.0270017	0	1236	287.567	948.433	NA	393	292.736	100.264	NA	NA	1.07587	1.03495:1.82692:1:1:1:1	0.456311(0.571602:0.366505:0.430825)	NA	NA	NA	NA
Arr	CHI&DIP	Spe41|Spe49	GMYN	0.41472	4.25433	0.0974817	2.29e-53	1206	290.745	915.255	NA	525	237.695	287.305	NA	NA	1.34038	1.27938:2.0059:1:1:1:1	0.484245(0.543532:0.364428:0.544776)	NA	NA	NA	NA
Arr	DIP&SYM	Spe45|Spe52	GMYN	0.621732	4.2239	0.147194	1.21e-39	1188	279.183	908.817	NA	614	236.54	377.46	NA	NA	1.46825	1.13638:1.88371:1:1:1:1	0.536195(0.588384:0.377525:0.642677)	NA	NA	NA	NA
Arr	DIP&CHI	Spe11|Spe38	GMYN	0.776127	3.53546	0.219527	6.65e-09	444	111.491	332.509	NA	245	87.2483	157.752	NA	NA	1.46901	1.63126:1.72347:1:1:1:1	0.463964(0.60473:0.35473:0.432432)	NA	NA	NA	NA
Arr	DIP&CHI	Spe16|Spe32	GMYN	0.121337	3.6393	0.0333408	4.29e-58	663	128.047	534.953	NA	166	106.409	59.5911	NA	NA	0.800773	1.6303:1.85628:1:1:1:1	0.381599(0.536199:0.330317:0.278281)	NA	NA	NA	NA
Arr	DIP&DIP	Spe16|Spe17	GMYN	0.101017	4.33177	0.02332	5.96e-123	1248	322.37	925.63	NA	342	254.907	87.0934	NA	NA	1.19386	2.26353:2.45646:1:1:1:1	0.449119(0.575721:0.36899:0.402644)	NA	NA	NA	NA
Arr	CHI&CHI	Spe33|Spe41	GMYN	0.0632202	4.33997	0.014567	3.76e-134	1224	325.913	898.087	NA	304	249.697	54.303	NA	NA	1.20198	2.18065:2.00442:1:1:1:1	0.470588(0.567402:0.36152:0.482843)	NA	NA	NA	NA
Arr	DIP&DIP	Spe17|Spe46	GMYN	0.427324	4.13164	0.103427	0	1203	246.867	956.133	NA	557	249.917	307.083	NA	NA	1.18749	0.928437:1.2669:1:1:1:1	0.54655(0.592269:0.374065:0.673317)	NA	NA	NA	NA
Arr	SYM&DIP	Spe08|Spe17	GMYN	0.131841	4.19436	0.0314328	2.28e-134	1230	268.401	961.599	NA	358	242.387	115.613	NA	NA	1.01833	0.739732:1.06538:1:1:1:1	0.501626(0.586585:0.359756:0.558537)	NA	NA	NA	NA
Arr	DIP&DIP	Spe43|Spe48	GMYN	0.10791	4.2523	0.0253769	3.81e-129	1248	289.956	958.044	NA	339	243.221	95.7791	NA	NA	1.0708	1.41519:2.25079:1:1:1:1	0.440705(0.579327:0.370192:0.372596)	NA	NA	NA	NA
Arr	CHI&CHI	Spe33|Spe39	GMYN	0.057274	4.27636	0.0133932	9.48e-135	1224	299.409	924.591	NA	282	231.139	50.8607	NA	NA	1.08933	2.2295:1.8666:1:1:1:1	0.435049(0.568627:0.360294:0.376225)	NA	NA	NA	NA
Arr	CHI&CHI	Spe32|Spe38	GMYN	0.66958	3.33656	0.20068	4.44e-15	426	85.5198	340.48	NA	223	75.1121	147.888	NA	NA	1.20498	1.12904:1.65356:1:1:1:1	0.406103(0.580986:0.330986:0.306338)	NA	NA	NA	NA
Arr	CHI&DIP	Spe33|Spe46	GMYN	0.449437	4.20656	0.106842	1.9e-92	1203	272.803	930.197	NA	575	265.337	309.663	NA	NA	1.30144	0.971434:1.50041:1:1:1:1	0.513716(0.5798:0.370324:0.591022)	NA	NA	NA	NA
Arr	CHI&CHI	Spe35|Spe37	GMYN	0.039483	3.60534	0.0109513	3.08e-72	495	122.378	372.622	NA	119	104.694	14.3064	NA	NA	0.921066	1.82016:2.05924:1:1:1:1	0.447475(0.569697:0.381818:0.390909)	NA	NA	NA	NA
Arr	CHI&CHI	Spe32|Spe40	GMYN	0.529588	3.52166	0.15038	1.86e-15	501	109.458	391.542	NA	232	86.5819	145.418	NA	NA	1.18329	1.17276:2.12835:1:1:1:1	0.376248(0.452096:0.335329:0.341317)	NA	NA	NA	NA
Arr	DIP&PAU	Spe12|Spe51	GMYN	0.113889	2.02871	0.0561384	1.08e-29	351	104.453	246.547	NA	99	73.1007	25.8993	NA	NA	0.683714	3.07998:2.25681:1:1:1:1	0.490028(0.568376:0.363248:0.538462)	NA	NA	NA	NA
Arr	CHI&SYM	Spe31|Spe52	GMYN	0.857662	4.17499	0.205429	6.62e-14	1041	261.557	779.443	NA	589	198.994	390.006	NA	NA	1.69116	1.31619:2.24763:1:1:1:1	0.523055(0.564841:0.400576:0.603746)	NA	NA	NA	NA
Arr	DIP&CHI	Spe15|Spe34	GMYN	0.0614051	3.14758	0.0195087	2.77e-43	324	66.4711	257.529	NA	75	59.8657	15.1343	NA	NA	0.694556	0.828469:1.27637:1:1:1:1	0.430556(0.513889:0.37963:0.398148)	NA	NA	NA	NA
Arr	CHI&DIP	Spe40|Spe45	GMYN	0.59835	4.23135	0.141409	7.39e-28	1137	281.97	855.03	NA	565	218.053	346.947	NA	NA	1.49932	1.39217:1.6346:1:1:1:1	0.469217(0.51715:0.365435:0.525066)	NA	NA	NA	NA
Arr	SYM&SYM	Spe09|Spe52	GMYN	0.628725	4.19141	0.150003	3.65e-44	1092	267.348	824.652	NA	580	235.921	344.079	NA	NA	1.50096	0.86617:1.95326:1:1:1:1	0.51511(0.596154:0.377747:0.571429)	NA	NA	NA	NA
Arr	CHI&CHI	Spe01|Spe35	GMYN	0.42412	4.29045	0.0988522	1.86e-72	1185	305.086	879.914	NA	552	271.222	280.778	NA	NA	1.41953	1.66249:2.27706:1:1:1:1	0.50211(0.589873:0.368354:0.548101)	NA	NA	NA	NA
Arr	CHI&DIP	Spe32|Spe49	GMYN	0.503396	3.71961	0.135336	6.13e-21	639	142.519	496.481	NA	292	113.279	178.721	NA	NA	1.22072	1.37846:1.72511:1:1:1:1	0.422535(0.50939:0.36385:0.394366)	NA	NA	NA	NA
Arr	DIP&CHI	Spe16|Spe41	GMYN	0.119846	4.29512	0.0279028	3.09e-132	1245	306.994	938.006	NA	365	261.665	103.335	NA	NA	1.14939	1.48496:1.8564:1:1:1:1	0.463454(0.575904:0.36988:0.444578)	NA	NA	NA	NA
Arr	CHI&CHI	Spe03|Spe40	GMYN	0.50704	4.19421	0.120891	2.43e-33	1095	268.346	826.654	NA	509	208.802	300.198	NA	NA	1.41064	1.55715:1.73218:1:1:1:1	0.429224(0.50411:0.350685:0.432877)	NA	NA	NA	NA
Arr	CHI&CHI	Spe33|Spe40	GMYN	0.507979	4.16702	0.121905	2.86e-28	1065	258.791	806.209	NA	487	194.507	292.493	NA	NA	1.39711	1.57097:2.20004:1:1:1:1	0.42723(0.504225:0.35493:0.422535)	NA	NA	NA	NA
Arr	CHI&DIP	Spe02|Spe44	GMYN	0.575052	3.59636	0.159898	3.2e-14	507	120.922	386.078	NA	247	94.5368	152.463	NA	NA	1.29565	1.20493:1.53196:1:1:1:1	0.503945(0.550296:0.390533:0.571006)	NA	NA	NA	NA
Arr	CHI&CHI	Spe37|Spe39	GMYN	0.0461983	3.53976	0.0130513	1.52e-66	495	112.132	382.868	NA	113	95.8773	17.1227	NA	NA	0.837593	1.29962:1.49093:1:1:1:1	0.443434(0.578788:0.384848:0.366667)	NA	NA	NA	NA
Arr	CHI&CHI	Spe33|Spe35	GMYN	0.0120385	1.02823	0.0117079	9.27e-93	1227	301.523	925.477	NA	162	150.964	11.036	NA	NA	0.261758	2.30471:6.54822:1:1:1:1	0.431133(0.562347:0.356968:0.374083)	NA	NA	NA	NA
Arr	PAU&CHI	Spe10|Spe36	GMYN	0.0845244	3.66315	0.0230743	2.02e-62	510	132.184	377.816	NA	142	111.898	30.1022	NA	NA	1.01205	1.62165:1.45845:1:1:1:1	0.521569(0.608824:0.394118:0.561765)	NA	NA	NA	NA
Arr	DIP&CHI	Spe15|Spe40	GMYN	0.58605	3.23494	0.181162	2.5e-11	324	74.6831	249.317	NA	161	61.6228	99.3772	NA	NA	1.19663	1.33309:1.90192:1:1:1:1	0.410494(0.462963:0.37963:0.388889)	NA	NA	NA	NA
Arr	CHI&DIP	Spe39|Spe49	GMYN	0.422651	4.22974	0.0999236	7.07e-53	1197	281.365	915.635	NA	524	232.405	291.595	NA	NA	1.31754	1.29274:1.65041:1:1:1:1	0.45071(0.548872:0.367168:0.43609)	NA	NA	NA	NA
Arr	CHI&CHI	Spe31|Spe36	GMYN	0.75019	4.16802	0.179987	2.09e-24	1020	259.139	760.861	NA	565	211.438	353.562	NA	NA	1.61852	1.48771:2.22921:1:1:1:1	0.467157(0.529412:0.375:0.497059)	NA	NA	NA	NA
Arr	CHI&SYM	Spe02|Spe08	GMYN	0.139491	3.5777	0.0389891	0	549	117.951	431.049	NA	177	122.564	54.436	NA	NA	0.878179	0.555158:0.882106:1:1:1:1	0.494536(0.571038:0.360656:0.551913)	NA	NA	NA	NA
Arr	CHI&DIP	Spe34|Spe48	GMYN	0.111764	4.18522	0.0267045	2.32e-143	1242	265.15	976.85	NA	341	240.075	100.925	NA	NA	0.981391	1.14483:1.71274:1:1:1:1	0.431562(0.567633:0.370773:0.35628)	NA	NA	NA	NA
Arr	CHI&DIP	Spe01|Spe45	GMYN	0.409663	4.21115	0.0972804	8.91e-70	1206	274.478	931.522	NA	534	244.167	289.833	NA	NA	1.27486	1.12259:1.84414:1:1:1:1	0.534826(0.597015:0.359453:0.64801)	NA	NA	NA	NA
Arr	CHI&CHI	Spe01|Spe37	GMYN	0.358473	3.57669	0.100225	2.32e-34	492	117.792	374.208	NA	211	105.65	105.35	NA	NA	1.12896	1.45389:1.74999:1:1:1:1	0.492886(0.597561:0.353659:0.527439)	NA	NA	NA	NA
Arr	CHI&SYM	Spe02|Spe52	GMYN	0.764978	3.56869	0.214358	5.58e-20	498	116.542	381.458	NA	286	106.455	179.545	NA	NA	1.42111	1.15987:2.0091:1:1:1:1	0.539157(0.590361:0.406627:0.620482)	NA	NA	NA	NA
Arr	SYM&PAU	Spe09|Spe10	GMYN	0.138826	3.62179	0.0383308	3.96e-58	510	125.092	384.908	NA	160	111.467	48.533	NA	NA	0.993122	1.06388:0.616456:1:1:1:1	0.512745(0.605882:0.405882:0.526471)	NA	NA	NA	NA
Arr	CHI&CHI	Spe01|Spe38	GMYN	0.885932	2.66755	0.332115	0.00353934	411	110.86	300.14	NA	228	74.8156	153.184	NA	NA	1.36649	1.70535:1.6198:1:1:1:1	0.513382(0.620438:0.390511:0.529197)	NA	NA	NA	NA
Arr	CHI&CHI	Spe02|Spe37	GMYN	0.885947	3.34714	0.264688	1.12e-06	375	86.7344	288.266	NA	215	68.9373	146.063	NA	NA	1.4552	0.909086:1.40799:1:1:1:1	0.464(0.604:0.352:0.436)	NA	NA	NA	NA
Arr	DIP&DIP	Spe12|Spe17	GMYN	0.0342953	3.4212	0.0100243	5.33e-33	333	93.1534	239.847	NA	68	60	8	NA	NA	0.981749	2:2:1:1:1:1	0.493994(0.621622:0.342342:0.518018)	NA	NA	NA	NA
Arr	CHI&CHI	Spe38|Spe39	GMYN	0.711808	3.48193	0.204429	7.85e-14	420	103.811	316.189	NA	232	88.9245	143.075	NA	NA	1.3965	1.98825:1.23908:1:1:1:1	0.440476(0.585714:0.357143:0.378571)	NA	NA	NA	NA
Arr	CHI&DIP	Spe37|Spe42	GMYN	0.393315	3.50875	0.112095	5.64e-38	492	107.591	384.409	NA	218	102.076	115.924	NA	NA	1.0746	0.858626:1.27293:1:1:1:1	0.450203(0.567073:0.368902:0.414634)	NA	NA	NA	NA
Arr	CHI&CHI	Spe36|Spe40	GMYN	0.524557	4.17572	0.125621	9.4e-32	1065	261.812	803.188	NA	503	204.66	298.34	NA	NA	1.42213	1.48118:1.95542:1:1:1:1	0.446479(0.502817:0.349296:0.487324)	NA	NA	NA	NA
Arr	DIP&DIP	Spe45|Spe48	GMYN	0.119975	4.24322	0.0282745	1.25e-170	1236	286.467	949.533	NA	380	275.345	104.655	NA	NA	1.07562	0.981848:1.79438:1:1:1:1	0.457929(0.571602:0.367718:0.434466)	NA	NA	NA	NA
Arr	CHI&DIP	Spe37|Spe43	GMYN	0.0756181	3.63479	0.020804	2.87e-66	495	127.28	367.72	NA	137	110.633	26.3665	NA	NA	0.990792	1.78511:2.44305:1:1:1:1	0.467677(0.587879:0.375758:0.439394)	NA	NA	NA	NA
Arr	PAU&CHI	Spe10|Spe37	GMYN	0.127113	3.5332	0.0359767	2.07e-35	366	111.156	254.844	NA	115	85.4648	29.5352	NA	NA	1.16156	4.01284:3.13331:1:1:1:1	0.504098(0.590164:0.413934:0.508197)	NA	NA	NA	NA
Arr	SYM&CHI	Spe08|Spe37	GMYN	0.081385	3.60164	0.0225967	4.73e-71	492	121.776	370.224	NA	140	111.56	28.4399	NA	NA	0.952693	1.15826:2.18793:1:1:1:1	0.486789(0.585366:0.381098:0.493902)	NA	NA	NA	NA
Arr	CHI&DIP	Spe03|Spe11	GMYN	0.344594	4.24019	0.0812687	1.23e-69	1257	285.312	971.688	NA	507	241.559	265.441	NA	NA	1.22881	1.296:1.01556:1:1:1:1	0.448687(0.552506:0.350835:0.442721)	NA	NA	NA	NA
Arr	DIP&CHI	Spe16|Spe40	GMYN	0.537649	4.1276	0.130257	4.43e-40	1062	245.543	816.457	NA	515	207.126	307.874	NA	NA	1.36768	1.32806:2.00513:1:1:1:1	0.420904(0.516949:0.362994:0.382768)	NA	NA	NA	NA
Arr	CHI&DIP	Spe32|Spe45	GMYN	0.1139	3.78638	0.0300816	7.1e-79	660	155.789	504.211	NA	193	139.965	53.0352	NA	NA	0.980767	1.43311:1.52507:1:1:1:1	0.438636(0.545455:0.331818:0.438636)	NA	NA	NA	NA
Arr	CHI&DIP	Spe37|Spe46	GMYN	0.413766	3.58782	0.115325	2.71e-25	489	119.552	369.448	NA	216	100.24	115.76	NA	NA	1.18977	1.35585:1.96997:1:1:1:1	0.514315(0.576687:0.386503:0.579755)	NA	NA	NA	NA
Arr	CHI&DIP	Spe01|Spe15	GMYN	0.458996	3.26647	0.140518	3.51e-22	321	77.8894	243.111	NA	155	72.8646	82.1354	NA	NA	1.14022	1.5311:2.06929:1:1:1:1	0.501558(0.53271:0.392523:0.579439)	NA	NA	NA	NA
Arr	CHI&DIP	Spe36|Spe45	GMYN	0.0991369	4.26931	0.0232208	2.51e-141	1230	296.609	933.391	NA	342	255.703	86.2974	NA	NA	1.10476	1.1825:1.84164:1:1:1:1	0.48252(0.570732:0.356098:0.520732)	NA	NA	NA	NA
Arr	DIP&DIP	Spe17|Spe44	GMYN	0.425178	4.18113	0.10169	1.35e-60	1179	263.708	915.292	NA	523	230.012	292.988	NA	NA	1.26527	0.945236:1.16785:1:1:1:1	0.505937(0.568702:0.379135:0.569975)	NA	NA	NA	NA
Arr	CHI&PAU	Spe39|Spe51	GMYN	0.101817	4.21638	0.0241479	1.36e-165	1224	276.398	947.602	NA	350	260.183	89.8167	NA	NA	1.03095	0.900625:1.25673:1:1:1:1	0.456291(0.568627:0.371324:0.428922)	NA	NA	NA	NA
Arr	CHI&DIP	Spe33|Spe44	GMYN	0.433418	4.21423	0.102846	1.58e-88	1179	275.606	903.394	NA	557	264.036	292.964	NA	NA	1.31723	1.05619:1.54122:1:1:1:1	0.473707(0.559796:0.371501:0.489822)	NA	NA	NA	NA
Arr	CHI&DIP	Spe31|Spe42	GMYN	0.819197	4.13448	0.198138	2.3e-13	972	247.805	724.195	NA	538	185.884	352.116	NA	NA	1.66441	1.22958:2.41803:1:1:1:1	0.45679(0.541667:0.365741:0.462963)	NA	NA	NA	NA
Arr	CHI&CHI	Spe01|Spe34	GMYN	0.405036	4.25563	0.0951765	1.8e-62	1185	291.249	893.751	NA	524	248.116	275.884	NA	NA	1.35144	1.41257:2.04771:1:1:1:1	0.506751(0.586076:0.367089:0.567089)	NA	NA	NA	NA
Arr	CHI&SYM	Spe34|Spe52	GMYN	0.667229	4.22227	0.158026	1.17e-46	1179	278.577	900.423	NA	639	249.012	389.988	NA	NA	1.50722	0.952343:1.92941:1:1:1:1	0.512299(0.581425:0.386768:0.568702)	NA	NA	NA	NA
Arr	CHI&CHI	Spe34|Spe41	GMYN	0.0594044	4.29122	0.0138432	7.49e-167	1242	305.402	936.598	NA	317	263.639	53.3607	NA	NA	1.09999	1.4222:1.57365:1:1:1:1	0.483092(0.571256:0.365942:0.512077)	NA	NA	NA	NA
Arr	CHI&DIP	Spe33|Spe45	GMYN	0.101334	4.25544	0.0238128	2.16e-156	1227	291.172	935.828	NA	353	264.681	88.3185	NA	NA	1.08712	1.22704:1.53844:1:1:1:1	0.46251(0.567237:0.352078:0.468215)	NA	NA	NA	NA
Arr	CHI&CHI	Spe02|Spe04	GMYN	0.408175	3.38438	0.120606	5.99e-23	357	91.1499	265.85	NA	163	80.3764	82.6236	NA	NA	1.16806	1.61923:1.74888:1:1:1:1	0.462185(0.495798:0.365546:0.52521)	NA	NA	NA	NA
Arr	DIP&DIP	Spe15|Spe42	GMYN	0.270083	3.20802	0.0841898	3.49e-30	324	72.0502	251.95	NA	124	67.6366	56.3634	NA	NA	0.923413	0.957969:1.98213:1:1:1:1	0.430556(0.513889:0.351852:0.425926)	NA	NA	NA	NA
Arr	CHI&DIP	Spe32|Spe44	GMYN	0.528783	3.73542	0.141559	1.39e-31	621	145.556	475.444	NA	308	130.763	177.237	NA	NA	1.28039	1.15116:1.66324:1:1:1:1	0.462158(0.538647:0.369565:0.478261)	NA	NA	NA	NA
Arr	DIP&DIP	Spe42|Spe46	GMYN	0.489714	4.16693	0.117524	3.07e-67	1119	258.761	860.239	NA	545	240.496	304.504	NA	NA	1.34005	1.26268:1.81929:1:1:1:1	0.520554(0.580429:0.357909:0.623324)	NA	NA	NA	NA
Arr	DIP&DIP	Spe12|Spe15	GMYN	1.15072	3.19299	0.360389	0.00287965	285	70.6208	214.379	NA	177	54.1202	122.88	NA	NA	1.65678	1.42105:1.62938:1:1:1:1	0.459649(0.584211:0.363158:0.431579)	NA	NA	NA	NA
Arr	CHI&DIP	Spe04|Spe15	GMYN	0.416061	3.32608	0.125091	3.61e-18	324	84.333	239.667	NA	147	71.4284	75.5716	NA	NA	1.1735	1.58395:1.67857:1:1:1:1	0.475309(0.537037:0.384259:0.50463)	NA	NA	NA	NA
Arr	DIP&SYM	Spe43|Spe52	GMYN	0.674436	4.24431	0.158904	3.54e-31	1152	286.883	865.117	NA	612	234.437	377.563	NA	NA	1.56344	1.22842:2.2022:1:1:1:1	0.520399(0.592448:0.385417:0.583333)	NA	NA	NA	NA
Arr	CHI&DIP	Spe01|Spe49	GMYN	0.269677	4.26319	0.0632572	3.06e-70	1185	294.198	890.802	NA	434	234.785	199.215	NA	NA	1.26114	1.69345:2.19268:1:1:1:1	0.510127(0.56962:0.368354:0.592405)	NA	NA	NA	NA
Arr	DIP&DIP	Spe16|Spe50	GMYN	0.117717	4.25355	0.027675	4.03e-164	1248	290.44	957.56	NA	377	273.294	103.706	NA	NA	1.08022	1.10628:1.89072:1:1:1:1	0.459936(0.576923:0.371394:0.43149)	NA	NA	NA	NA
Arr	CHI&DIP	Spe38|Spe50	GMYN	0.72316	3.51291	0.205858	4.82e-10	438	108.189	329.811	NA	236	85.6469	150.353	NA	NA	1.41225	1.55551:1.72614:1:1:1:1	0.464612(0.589041:0.349315:0.455479)	NA	NA	NA	NA
Arr	DIP&CHI	Spe11|Spe31	GMYN	0.71086	2.93081	0.242547	4.49e-16	1020	262.743	757.257	NA	534	193.099	340.901	NA	NA	1.2827	1.40965:2.19874:1:1:1:1	0.468627(0.535294:0.376471:0.494118)	NA	NA	NA	NA
Arr	CHI&DIP	Spe37|Spe45	GMYN	0.0665173	3.6459	0.0182444	2.59e-63	495	129.179	365.821	NA	131	107.85	23.1495	NA	NA	1.00062	1.21373:3.00776:1:1:1:1	0.487879(0.578788:0.384848:0.5)	NA	NA	NA	NA
Arr	DIP&DIP	Spe17|Spe48	GMYN	0.106946	4.32513	0.0247266	3.81e-127	1248	319.528	928.472	NA	352	259.885	92.1153	NA	NA	1.18694	2.11605:2.41872:1:1:1:1	0.450721(0.575721:0.370192:0.40625)	NA	NA	NA	NA
Arr	DIP&CHI	Spe16|Spe36	GMYN	0.112763	4.21978	0.0267226	9.6e-120	1230	277.653	952.347	NA	330	230.741	99.2592	NA	NA	1.03986	1.3194:1.59778:1:1:1:1	0.437398(0.565854:0.367073:0.379268)	NA	NA	NA	NA
Arr	SYM&DIP	Spe08|Spe42	GMYN	0.409855	4.21805	0.0971668	1.6e-55	1137	277.015	859.985	NA	499	231.493	267.507	NA	NA	1.33767	1.09618:1.82433:1:1:1:1	0.474934(0.580475:0.337731:0.506596)	NA	NA	NA	NA
Arr	PAU&CHI	Spe10|Spe38	GMYN	0.867063	3.37576	0.25685	7.93e-08	366	90.1083	275.892	NA	212	73.1106	138.889	NA	NA	1.4847	1.06017:1.18205:1:1:1:1	0.497268(0.57377:0.405738:0.512295)	NA	NA	NA	NA
Arr	CHI&CHI	Spe01|Spe32	GMYN	0.542108	3.81559	0.142077	1.09e-37	639	161.977	477.023	NA	330	149.705	180.295	NA	NA	1.37189	1.48904:2.51645:1:1:1:1	0.485915(0.568075:0.366197:0.523474)	NA	NA	NA	NA
Arr	CHI&CHI	Spe36|Spe38	GMYN	0.640233	3.407	0.187917	2.87e-14	426	93.9408	332.059	NA	220	79.9898	140.01	NA	NA	1.25036	1.20097:1.65648:1:1:1:1	0.42723(0.570423:0.327465:0.383803)	NA	NA	NA	NA
Arr	CHI&PAU	Spe03|Spe51	GMYN	0.351538	4.22941	0.0831174	2.44e-90	1242	281.243	960.757	NA	526	259.43	266.57	NA	NA	1.22966	1.17422:1.23562:1:1:1:1	0.442834(0.549517:0.353865:0.425121)	NA	NA	NA	NA
Arr	DIP&DIP	Spe49|Spe50	GMYN	0.427113	4.20826	0.101494	2.58e-66	1194	273.42	920.58	NA	538	242.544	295.456	NA	NA	1.29298	1.07207:1.55265:1:1:1:1	0.479481(0.548995:0.356784:0.532663)	NA	NA	NA	NA
Arr	CHI&CHI	Spe33|Spe34	GMYN	0.0380598	2.1414	0.0177733	5.09e-127	1227	300.897	926.103	NA	247	212.686	34.3137	NA	NA	0.553862	2.04319:1.89073:1:1:1:1	0.437245(0.55868:0.359413:0.393643)	NA	NA	NA	NA
Arr	DIP&DIP	Spe12|Spe16	GMYN	0.0840664	3.28502	0.0255908	5.35e-45	333	79.8398	253.16	NA	92	71.9375	20.0625	NA	NA	0.851524	1.32523:0.906861:1:1:1:1	0.445946(0.59009:0.342342:0.405405)	NA	NA	NA	NA
Arr	CHI&DIP	Spe41|Spe42	GMYN	0.402844	4.22299	0.095393	3.74e-52	1137	278.844	858.156	NA	491	227.325	263.675	NA	NA	1.33972	1.29503:1.83851:1:1:1:1	0.475374(0.572559:0.344327:0.509235)	NA	NA	NA	NA
Arr	CHI&CHI	Spe37|Spe41	GMYN	0.0322001	3.54863	0.00907394	5.47e-66	495	113.466	381.534	NA	105	92.9918	12.0082	NA	NA	0.838254	0.901402:1.50679:1:1:1:1	0.479798(0.569697:0.375758:0.493939)	NA	NA	NA	NA
Arr	CHI&CHI	Spe32|Spe35	GMYN	0.00805379	1.10727	0.00727359	3.14e-53	663	162.944	500.056	NA	86	82	4	NA	NA	0.278204	3.08704:3.09041:1:1:1:1	0.404977(0.538462:0.334842:0.341629)	NA	NA	NA	NA
Arr	DIP&DIP	Spe15|Spe49	GMYN	0.509725	3.24079	0.157284	1.13e-12	321	75.2675	245.733	NA	151	61.5876	89.4124	NA	NA	1.1501	1.25681:1.28098:1:1:1:1	0.443925(0.46729:0.406542:0.457944)	NA	NA	NA	NA
Arr	CHI&CHI	Spe34|Spe39	GMYN	0.0519679	4.26942	0.0121721	9.51e-152	1224	296.653	927.347	NA	289	242.568	46.4323	NA	NA	1.07413	1.63194:2.66494:1:1:1:1	0.447304(0.569853:0.365196:0.406863)	NA	NA	NA	NA
Arr	SYM&CHI	Spe08|Spe34	GMYN	0.119125	4.21932	0.0282331	2.42e-166	1224	277.484	946.516	NA	370	266.398	103.602	NA	NA	1.04865	0.723832:1.64634:1:1:1:1	0.481209(0.574755:0.359069:0.509804)	NA	NA	NA	NA
Arr	DIP&CHI	Spe17|Spe33	GMYN	0.0811862	4.30774	0.0188466	2.55e-129	1227	312.204	914.796	NA	317	246.83	70.1695	NA	NA	1.15661	1.91339:1.7871:1:1:1:1	0.456398(0.570905:0.356968:0.44132)	NA	NA	NA	NA
Arr	SYM&PAU	Spe08|Spe51	GMYN	0.115127	4.2655	0.0269902	5.57e-148	1230	295.105	934.895	NA	365	265.663	99.3371	NA	NA	1.1109	1.2138:1.11498:1:1:1:1	0.49065(0.576829:0.358537:0.536585)	NA	NA	NA	NA
Arr	CHI&CHI	Spe32|Spe37	GMYN	0.0978626	2.17588	0.0449762	2.23e-10	78	18.1954	59.8046	NA	21	15.5602	5.43976	NA	NA	0.58261	2:2:1:1:1:1	0.371795(0.480769:0.230769:0.403846)	NA	NA	NA	NA
Arr	CHI&DIP	Spe32|Spe48	GMYN	0.129653	3.69512	0.0350877	1.89e-53	663	137.941	525.059	NA	172	109.837	62.1628	NA	NA	0.871472	2.12122:1.86633:1:1:1:1	0.386878(0.533937:0.330317:0.29638)	NA	NA	NA	NA
Arr	DIP&SYM	Spe48|Spe52	GMYN	0.652056	4.24099	0.153751	4.81e-62	1188	285.619	902.381	NA	654	269.131	384.869	NA	NA	1.51491	0.943584:1.94347:1:1:1:1	0.491162(0.582071:0.386364:0.505051)	NA	NA	NA	NA
Arr	CHI&CHI	Spe03|Spe31	GMYN	0.671636	4.15851	0.161509	2.04e-26	1032	255.874	776.126	NA	544	206.498	337.502	NA	NA	1.53617	1.29892:2.06152:1:1:1:1	0.446221(0.531977:0.367733:0.438953)	NA	NA	NA	NA
Arr	CHI&DIP	Spe35|Spe44	GMYN	0.432824	4.22081	0.102545	2.08e-95	1179	278.034	900.966	NA	562	270.105	291.895	NA	NA	1.32611	1.06303:1.4555:1:1:1:1	0.47922(0.566158:0.374046:0.497455)	NA	NA	NA	NA
Arr	DIP&CHI	Spe16|Spe35	GMYN	0.120237	4.1885	0.0287066	2.11e-132	1227	266.311	960.689	NA	343	236.817	106.183	NA	NA	1.00322	1.48508:1.84578:1:1:1:1	0.42176(0.567237:0.363081:0.334963)	NA	NA	NA	NA
Arr	CHI&DIP	Spe01|Spe46	GMYN	0.301867	4.03334	0.074843	8.98e-108	1200	216.542	983.458	NA	457	215.474	241.526	NA	NA	0.975218	0.838589:1.4806:1:1:1:1	0.585(0.6075:0.38:0.7675)	NA	NA	NA	NA
Arr	DIP&SYM	Spe16|Spe52	GMYN	0.634695	4.23371	0.149914	3.16e-57	1146	282.86	863.14	NA	623	261.134	361.866	NA	NA	1.52302	0.95784:2.15092:1:1:1:1	0.494328(0.586387:0.393979:0.502618)	NA	NA	NA	NA
Arr	DIP&DIP	Spe15|Spe48	GMYN	0.0538144	3.20488	0.0167914	4.31e-44	324	71.7489	252.251	NA	76	62.971	13.029	NA	NA	0.751609	1.53972:4.11348:1:1:1:1	0.41358(0.523148:0.375:0.342593)	NA	NA	NA	NA
Arr	CHI&CHI	Spe04|Spe37	GMYN	0.374179	3.49025	0.107207	7.95e-21	420	104.97	315.03	NA	176	84.4301	91.5699	NA	NA	1.15297	1.09029:1.82187:1:1:1:1	0.483333(0.571429:0.392857:0.485714)	NA	NA	NA	NA
Arr	CHI&CHI	Spe31|Spe32	GMYN	0.809944	3.55681	0.227717	1.67e-07	474	114.71	359.29	NA	259	86.3736	172.626	NA	NA	1.4747	1.59258:2.90529:1:1:1:1	0.420886(0.506329:0.357595:0.398734)	NA	NA	NA	NA
Arr	DIP&DIP	Spe43|Spe45	GMYN	0.0928756	4.27012	0.0217501	5.01e-180	1314	296.93	1017.07	NA	367	278.528	88.4724	NA	NA	1.03682	0.841207:1.33443:1:1:1:1	0.480594(0.575342:0.356164:0.510274)	NA	NA	NA	NA
Arr	DIP&CHI	Spe11|Spe41	GMYN	0.116104	4.30315	0.0269812	3.12e-142	1311	310.299	1000.7	NA	376	268.935	107.065	NA	NA	1.10713	1.21113:1.4425:1:1:1:1	0.494661(0.569794:0.363844:0.550343)	NA	NA	NA	NA
Arr	DIP&DIP	Spe15|Spe50	GMYN	0.0222568	1.29956	0.0171265	4.98e-33	324	93.8739	230.126	NA	63	57.9578	5.04217	NA	NA	0.392335	2.84079:1.76002:1:1:1:1	0.466049(0.537037:0.37963:0.481481)	NA	NA	NA	NA
Arr	DIP&CHI	Spe16|Spe37	GMYN	0.11651	3.53973	0.032915	4.34e-62	495	112.128	382.872	NA	145	103.945	41.0545	NA	NA	0.891941	1.19387:2.72525:1:1:1:1	0.439394(0.581818:0.387879:0.348485)	NA	NA	NA	NA
Arr	CHI&DIP	Spe41|Spe45	GMYN	0.133726	4.30464	0.0310656	4.46e-148	1314	310.916	1003.08	NA	402	279.891	122.109	NA	NA	1.12064	1.30726:1.73613:1:1:1:1	0.501522(0.561644:0.361872:0.58105)	NA	NA	NA	NA
Arr	DIP&CHI	Spe16|Spe34	GMYN	0.109027	4.18731	0.0260376	1.11e-143	1242	265.888	976.112	NA	339	240.426	98.5742	NA	NA	0.982108	1.18755:1.71406:1:1:1:1	0.430354(0.567633:0.369565:0.353865)	NA	NA	NA	NA
Arr	SYM&SYM	Spe08|Spe52	GMYN	0.638584	4.17492	0.152957	6.15e-37	1137	261.532	875.468	NA	591	222.334	368.666	NA	NA	1.45201	0.898883:2.01921:1:1:1:1	0.544855(0.601583:0.385224:0.647757)	NA	NA	NA	NA
Arr	CHI&DIP	Spe35|Spe48	GMYN	0.12282	4.16923	0.0294587	5.08e-135	1227	259.557	967.443	NA	343	234.005	108.995	NA	NA	0.978788	1.2129:1.84355:1:1:1:1	0.42339(0.566015:0.364303:0.339853)	NA	NA	NA	NA
Arr	DIP&CHI	Spe16|Spe38	GMYN	0.698549	3.3488	0.208597	1.66e-08	426	86.9269	339.073	NA	219	67.6284	151.372	NA	NA	1.23934	1.51849:1.53401:1:1:1:1	0.410798(0.602113:0.338028:0.292254)	NA	NA	NA	NA
Arr	CHI&PAU	Spe03|Spe10	GMYN	0.269717	3.59719	0.0749798	2.63e-44	504	121.056	382.944	NA	197	110.988	86.0118	NA	NA	1.06894	1.03764:1.33251:1:1:1:1	0.483135(0.58631:0.380952:0.482143)	NA	NA	NA	NA
Arr	CHI&DIP	Spe02|Spe45	GMYN	0.111472	3.75324	0.0297002	1.5e-53	549	149.057	399.943	NA	158	116.74	41.2604	NA	NA	1.10023	2.18971:1.32976:1:1:1:1	0.48725(0.57377:0.363388:0.52459)	NA	NA	NA	NA
Arr	SYM&DIP	Spe08|Spe11	GMYN	0.103591	4.19098	0.0247176	0	1224	267.192	956.808	NA	364	271.916	92.0835	NA	NA	0.995843	0.665603:1.00264:1:1:1:1	0.497958(0.584559:0.356618:0.552696)	NA	NA	NA	NA
Arr	DIP&PAU	Spe48|Spe51	GMYN	0.130859	4.18794	0.0312467	3.17e-169	1245	266.114	978.886	NA	378	261.192	116.808	NA	NA	0.998044	0.679824:1.62164:1:1:1:1	0.438956(0.562651:0.374699:0.379518)	NA	NA	NA	NA
Arr	SYM&CHI	Spe09|Spe37	GMYN	0.0894453	3.63234	0.0246247	7.06e-56	495	126.865	368.135	NA	134	103.076	30.924	NA	NA	0.997466	1.95319:2.01528:1:1:1:1	0.461616(0.578788:0.378788:0.427273)	NA	NA	NA	NA
Arr	CHI&DIP	Spe31|Spe43	GMYN	0.735909	4.17752	0.176159	2.42e-23	1032	262.44	769.56	NA	564	210.735	353.265	NA	NA	1.61112	1.42462:2.36165:1:1:1:1	0.463663(0.537791:0.376453:0.476744)	NA	NA	NA	NA
Arr	DIP&CHI	Spe17|Spe38	GMYN	0.751618	3.52352	0.213314	1.68e-08	426	109.731	316.269	NA	232	84.3287	147.671	NA	NA	1.46562	1.86284:1.62958:1:1:1:1	0.45892(0.588028:0.359155:0.429577)	NA	NA	NA	NA
Arr	DIP&DIP	Spe43|Spe49	GMYN	0.406266	4.22755	0.0960996	6.68e-58	1188	280.545	907.455	NA	516	235.386	280.614	NA	NA	1.30866	1.17225:1.74987:1:1:1:1	0.457912(0.549242:0.361111:0.463384)	NA	NA	NA	NA
Arr	DIP&CHI	Spe12|Spe34	GMYN	0.0597038	3.33821	0.017885	0	333	85.7075	247.292	NA	101	86.8602	14.1398	NA	NA	0.903525	1.46661:2.4595:1:1:1:1	0.463964(0.603604:0.333333:0.454955)	NA	NA	NA	NA
Arr	SYM&DIP	Spe09|Spe50	GMYN	0.0882086	4.25315	0.0207396	3.23e-116	1113	290.284	822.716	NA	298	229.752	68.2485	NA	NA	1.17448	1.7919:1.63096:1:1:1:1	0.483378(0.571429:0.367925:0.510782)	NA	NA	NA	NA
Arr	CHI&CHI	Spe01|Spe33	GMYN	0.427308	4.27175	0.100031	2.84e-65	1185	297.575	887.425	NA	544	259.058	284.942	NA	NA	1.39272	1.45561:2.07155:1:1:1:1	0.496624(0.586076:0.364557:0.539241)	NA	NA	NA	NA
Arr	SYM&DIP	Spe08|Spe16	GMYN	0.148845	4.25568	0.0349756	7.43e-170	1227	291.268	935.732	NA	411	285.572	125.428	NA	NA	1.12374	1.02899:1.7956:1:1:1:1	0.461695(0.57824:0.363081:0.443765)	NA	NA	NA	NA
Arr	DIP&CHI	Spe12|Spe37	GMYN	0.0970107	2.93061	0.0331026	3.02e-29	186	49.7732	136.227	NA	59	46.6537	12.3463	NA	NA	0.855276	1.29572:1.83296:1:1:1:1	0.462366(0.596774:0.330645:0.459677)	NA	NA	NA	NA
Arr	DIP&SYM	Spe15|Spe52	GMYN	0.781872	3.29285	0.237445	6.68e-12	321	80.6781	240.322	NA	186	71.2465	114.753	NA	NA	1.41296	1.42352:1.81509:1:1:1:1	0.537383(0.598131:0.429907:0.584112)	NA	NA	NA	NA
Arr	CHI&PAU	Spe04|Spe51	GMYN	0.405883	4.03362	0.100625	6.28e-48	816	216.623	599.377	NA	373	187.353	185.647	NA	NA	1.36893	1.76941:1.82018:1:1:1:1	0.480392(0.545956:0.386029:0.509191)	NA	NA	NA	NA
Arr	CHI&CHI	Spe38|Spe41	GMYN	0.674458	3.45681	0.19511	9.68e-11	402	100.392	301.608	NA	212	80.3793	131.621	NA	NA	1.3693	1.12562:2.10991:1:1:1:1	0.487562(0.615672:0.343284:0.503731)	NA	NA	NA	NA
Arr	SYM&CHI	Spe08|Spe31	GMYN	0.780834	2.44163	0.319801	1.68e-12	1032	265.823	766.177	NA	555	191.68	363.32	NA	NA	1.20862	1.41301:2.46571:1:1:1:1	0.491764(0.549419:0.372093:0.553779)	NA	NA	NA	NA
Arr	DIP&CHI	Spe15|Spe38	GMYN	0.950527	2.75054	0.345579	0.00934071	171	39.1493	131.851	NA	99	29.9769	69.0231	NA	NA	1.36263	0.997973:1.36658:1:1:1:1	0.435673(0.54386:0.359649:0.403509)	NA	NA	NA	NA
Arr	CHI&CHI	Spe03|Spe38	GMYN	0.413623	3.35999	0.123103	9.85e-19	438	88.2331	349.767	NA	182	72.6157	109.384	NA	NA	1.00715	0.793464:1.59932:1:1:1:1	0.434932(0.575342:0.356164:0.373288)	NA	NA	NA	NA
Arr	DIP&CHI	Spe15|Spe41	GMYN	0.0613462	3.29892	0.0185959	3.61e-48	324	81.3336	242.666	NA	87	72.7516	14.2484	NA	NA	0.874073	1.31929:2.27996:1:1:1:1	0.475309(0.532407:0.37963:0.513889)	NA	NA	NA	NA
Arr	DIP&PAU	Spe42|Spe51	GMYN	0.403225	4.22507	0.0954362	5.15e-53	1137	279.62	857.38	NA	494	229.989	264.011	NA	NA	1.34312	1.41279:1.7297:1:1:1:1	0.44635(0.560686:0.341689:0.436675)	NA	NA	NA	NA
Arr	CHI&DIP	Spe04|Spe17	GMYN	0.37733	3.97434	0.0949415	9.79e-49	813	200.162	612.838	NA	353	173.416	179.584	NA	NA	1.26292	1.20009:1.58017:1:1:1:1	0.49508(0.562731:0.380074:0.542435)	NA	NA	NA	NA
Arr	DIP&DIP	Spe44|Spe49	GMYN	0.24501	4.2668	0.0574223	5.16e-86	1191	295.618	895.382	NA	433	247.545	185.455	NA	NA	1.24326	1.62951:1.89943:1:1:1:1	0.488245(0.540302:0.371537:0.552897)	NA	NA	NA	NA
Arr	CHI&DIP	Spe38|Spe46	GMYN	0.705235	3.45533	0.2041	1.56e-09	351	100.194	250.806	NA	192	79.7139	112.286	NA	NA	1.49026	2.68315:2.00897:1:1:1:1	0.538462(0.623932:0.376068:0.615385)	NA	NA	NA	NA
Arr	CHI&CHI	Spe03|Spe33	GMYN	0.328476	4.13426	0.0794521	2.88e-112	1218	247.732	970.268	NA	501	245.928	255.072	NA	NA	1.10254	0.97264:1.19336:1:1:1:1	0.426108(0.552956:0.350985:0.374384)	NA	NA	NA	NA
Arr	DIP&DIP	Spe11|Spe48	GMYN	0.116948	4.21613	0.0277382	6.26e-135	1236	276.306	959.694	NA	347	243.703	103.297	NA	NA	1.03332	0.837989:1.8989:1:1:1:1	0.447411(0.574029:0.366505:0.401699)	NA	NA	NA	NA
Arr	CHI&DIP	Spe04|Spe11	GMYN	0.367516	4.00574	0.0917475	9.91e-47	816	208.718	607.282	NA	351	176.509	174.491	NA	NA	1.29811	1.51681:1.66685:1:1:1:1	0.487745(0.556985:0.382353:0.523897)	NA	NA	NA	NA
Arr	CHI&DIP	Spe35|Spe45	GMYN	0.0923996	4.25046	0.0217387	2.98e-167	1224	289.247	934.753	NA	348	267.052	80.9475	NA	NA	1.075	1.1586:1.33847:1:1:1:1	0.469363(0.569853:0.356618:0.481618)	NA	NA	NA	NA
Arr	DIP&CHI	Spe17|Spe37	GMYN	0.073701	3.57418	0.0206204	1.26e-64	495	117.398	377.602	NA	129	102.583	26.4166	NA	NA	0.903903	0.985664:1.65373:1:1:1:1	0.494949(0.59697:0.375758:0.512121)	NA	NA	NA	NA
Arr	SYM&DIP	Spe09|Spe12	GMYN	0.136496	3.37877	0.0403983	1.11e-35	342	90.4703	251.53	NA	107	75.8719	31.1281	NA	NA	0.994184	1.62729:2.35747:1:1:1:1	0.473684(0.587719:0.359649:0.473684)	NA	NA	NA	NA
Arr	SYM&DIP	Spe09|Spe16	GMYN	0.107869	4.12756	0.0261338	1.89e-132	1080	245.528	834.472	NA	307	223.543	83.4566	NA	NA	1.02171	1.38221:1.86468:1:1:1:1	0.428241(0.558333:0.366667:0.359722)	NA	NA	NA	NA
Arr	DIP&CHI	Spe17|Spe41	GMYN	0.0855606	4.31307	0.0198375	7.2e-121	1242	314.43	927.57	NA	315	240.3	74.7001	NA	NA	1.15582	1.64527:2.58619:1:1:1:1	0.50161(0.57971:0.364734:0.560386)	NA	NA	NA	NA
Arr	SYM&SYM	Spe08|Spe09	GMYN	0.0744752	4.09367	0.0181928	1.33e-157	1080	234.681	845.319	NA	282	222.29	59.71	NA	NA	0.947837	0.52916:1.02071:1:1:1:1	0.480556(0.573611:0.352778:0.515278)	NA	NA	NA	NA
Arr	CHI&CHI	Spe32|Spe34	GMYN	0.0484021	1.90177	0.0254511	6.59e-63	663	158.42	504.58	NA	133	109.404	23.5962	NA	NA	0.491252	2.44035:1.9259:1:1:1:1	0.412519(0.531674:0.341629:0.364253)	NA	NA	NA	NA
Arr	SYM&DIP	Spe09|Spe48	GMYN	0.110242	4.1252	0.026724	4.53e-120	1080	244.758	835.242	NA	300	214.764	85.236	NA	NA	1.02014	1.34816:1.82571:1:1:1:1	0.429167(0.556944:0.368056:0.3625)	NA	NA	NA	NA
Arr	CHI&CHI	Spe03|Spe04	GMYN	0.227255	3.96123	0.0573698	1.39e-72	807	196.691	610.309	NA	294	175.549	118.451	NA	NA	1.13734	0.970529:2.14885:1:1:1:1	0.464684(0.550186:0.369888:0.473978)	NA	NA	NA	NA
Arr	CHI&DIP	Spe36|Spe46	GMYN	0.432559	4.20334	0.102908	6.61e-61	1206	271.633	934.367	NA	540	236.907	303.093	NA	NA	1.28187	1.3266:1.70436:1:1:1:1	0.532753(0.578358:0.371891:0.64801)	NA	NA	NA	NA
Arr	CHI&DIP	Spe34|Spe44	GMYN	0.404589	4.22355	0.0957936	1.67e-55	1179	279.053	899.947	NA	509	231.385	277.615	NA	NA	1.30848	1.13115:1.5459:1:1:1:1	0.484733(0.559796:0.372774:0.521628)	NA	NA	NA	NA
Arr	SYM&CHI	Spe09|Spe41	GMYN	0.0972901	4.20121	0.0231576	2.54e-144	1116	270.862	845.138	NA	321	244.277	76.7229	NA	NA	1.09334	1.13865:1.9715:1:1:1:1	0.478943(0.557796:0.364247:0.514785)	NA	NA	NA	NA
Arr	CHI&CHI	Spe33|Spe37	GMYN	0.0476045	3.59787	0.0132313	6.98e-59	495	121.166	373.834	NA	112	94.7959	17.2041	NA	NA	0.916636	1.6118:2.18411:1:1:1:1	0.449495(0.563636:0.378788:0.406061)	NA	NA	NA	NA
Arr	DIP&CHI	Spe17|Spe40	GMYN	0.566523	2.26625	0.249982	1.57e-20	1068	266.541	801.459	NA	503	190.167	312.833	NA	NA	0.990725	1.47649:2.37217:1:1:1:1	0.458333(0.516854:0.360955:0.497191)	NA	NA	NA	NA
Arr	CHI&DIP	Spe02|Spe17	GMYN	0.10584	3.72912	0.0283819	1.13e-55	549	144.338	404.662	NA	154	114.214	39.7864	NA	NA	1.05844	1.8931:1.67847:1:1:1:1	0.466302(0.554645:0.36612:0.478142)	NA	NA	NA	NA
Arr	DIP&CHI	Spe15|Spe33	GMYN	0.0665599	3.17384	0.0209714	0	324	68.8405	255.159	NA	87	70.8081	16.1919	NA	NA	0.726767	1.13287:1.95364:1:1:1:1	0.419753(0.509259:0.37963:0.37037)	NA	NA	NA	NA
Arr	DIP&DIP	Spe11|Spe16	GMYN	0.111684	4.23652	0.0263623	8.61e-155	1236	283.919	952.081	NA	360	261.784	98.2159	NA	NA	1.05919	1.07358:1.95587:1:1:1:1	0.445793(0.574029:0.365291:0.398058)	NA	NA	NA	NA
Arr	CHI&DIP	Spe39|Spe45	GMYN	0.0883647	4.30424	0.0205297	2.08e-135	1224	310.75	913.25	NA	330	254.203	75.7969	NA	NA	1.15869	1.56051:1.91008:1:1:1:1	0.473039(0.57598:0.360294:0.482843)	NA	NA	NA	NA
Arr	CHI&DIP	Spe34|Spe49	GMYN	0.416741	4.19717	0.0992908	1.37e-62	1197	269.409	927.591	NA	526	234.114	291.886	NA	NA	1.2676	1.0366:1.71824:1:1:1:1	0.452381(0.5401:0.364662:0.452381)	NA	NA	NA	NA
Arr	SYM&DIP	Spe09|Spe46	GMYN	0.378897	4.12047	0.0919546	1.07e-93	1101	243.22	857.78	NA	489	237.484	251.516	NA	NA	1.20544	0.753456:1.45762:1:1:1:1	0.521798(0.581744:0.373297:0.610354)	NA	NA	NA	NA
[truncated: 21,833 more rows]
