# Supplementary material for: Reinvestigating the phylogeny of Myriapoda with more extensive taxon sampling and novel genetic perspective
Source: PeerJ journal article supplement (doi:10.7717/peerj.12691), 2021-12-23

Tree scale: 0.1

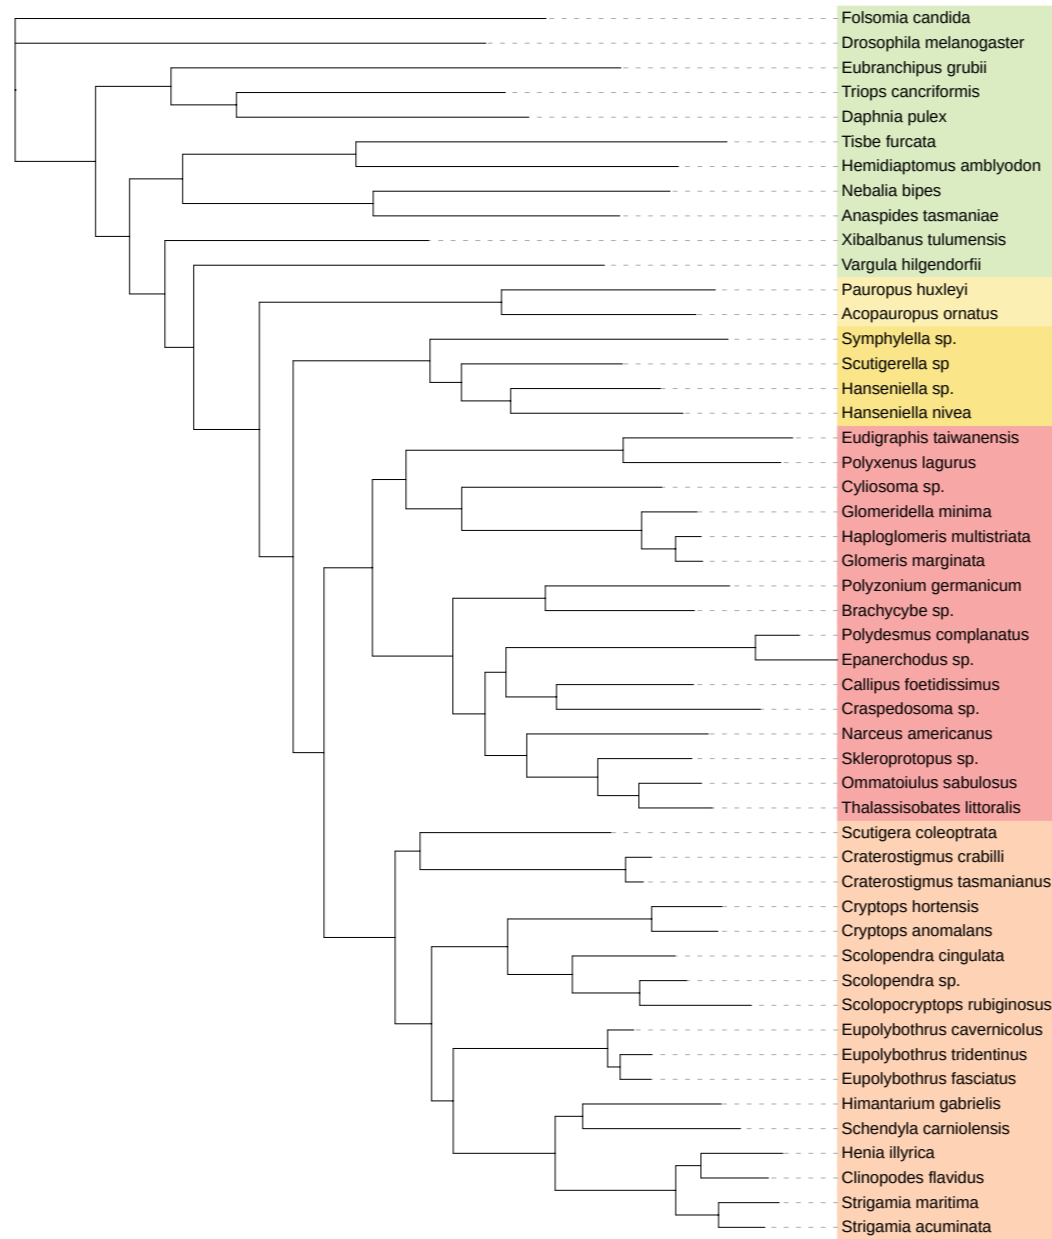

Supplement: Supplementary_Figure_5._ML_tree_on_matrix_OCC100_without_outgroups_from_Chelicerata.pdf [file Supplementary_Figure_5._ML_tree_on_matrix_OCC100_without_outgroups_from_Chelicerata.pdf]
